# Supplementary material for: Shedding light on the bacterial resistance to toxic UV filters: a comparative genomic study
Source: PeerJ. 2021 Nov 1;9:e12278. doi: 10.7717/peerj.12278 (PMC8567853; doi:10.7717/peerj.12278)
Supplement: Supplemental Information 1 [file peerj-09-12278-s001.xlsx]

## Sheet: Title page
Supplementary material
Title	Shedding light on the bacterial resistance to toxic UV filters: a comparative genomic study
Authors	Clément Lozano; Philippe Lebaron; Sabine Matallana-Surget

## Sheet: a ornithini A VS A mannitolivor
Presence	Category	Subcategory	Subsystem	Role	Organism A	SS active A	Organism B	SS active B
A and B	Amino Acids and Derivatives	Alanine, serine, and glycine	Alanine biosynthesis	Alanine racemase (EC 5.1.1.1)	<a href=&#39;?page=Annotation&feature=fig|6666666.640606.peg.1211&#39; target=_blank>fig|6666666.640606.peg.1211</a>, <a href=&#39;?page=Annotation&feature=fig|6666666.640606.peg.1972&#39; target=_blank>fig|6666666.640606.peg.1972</a>	yes	<a href=&#39;?page=Annotation&feature=fig|6666666.640605.peg.764&#39; target=_blank>fig|6666666.640605.peg.764</a>, <a href=&#39;?page=Annotation&feature=fig|6666666.640605.peg.784&#39; target=_blank>fig|6666666.640605.peg.784</a>	yes
A and B	Amino Acids and Derivatives	Alanine, serine, and glycine	Alanine biosynthesis	Branched-chain amino acid aminotransferase (EC 2.6.1.42)	<a href=&#39;?page=Annotation&feature=fig|6666666.640606.peg.588&#39; target=_blank>fig|6666666.640606.peg.588</a>	yes	<a href=&#39;?page=Annotation&feature=fig|6666666.640605.peg.2591&#39; target=_blank>fig|6666666.640605.peg.2591</a>	yes
A and B	Amino Acids and Derivatives	Alanine, serine, and glycine	Alanine biosynthesis	Cysteine desulfurase (EC 2.8.1.7)	<a href=&#39;?page=Annotation&feature=fig|6666666.640606.peg.852&#39; target=_blank>fig|6666666.640606.peg.852</a>, <a href=&#39;?page=Annotation&feature=fig|6666666.640606.peg.875&#39; target=_blank>fig|6666666.640606.peg.875</a>, <a href=&#39;?page=Annotation&feature=fig|6666666.640606.peg.1817&#39; target=_blank>fig|6666666.640606.peg.1817</a>, <a href=&#39;?page=Annotation&feature=fig|6666666…	yes	<a href=&#39;?page=Annotation&feature=fig|6666666.640605.peg.284&#39; target=_blank>fig|6666666.640605.peg.284</a>, <a href=&#39;?page=Annotation&feature=fig|6666666.640605.peg.1779&#39; target=_blank>fig|6666666.640605.peg.1779</a>, <a href=&#39;?page=Annotation&feature=fig|6666666.640605.peg.1799&#39; target=_blank>fig|6666666.640605.peg.1799</a>, <a href=&#39;?page=Annotation&feature=fig|66666…	yes
A and B	Amino Acids and Derivatives	Alanine, serine, and glycine	Alanine biosynthesis	Ferredoxin, 2Fe-2S	<a href=&#39;?page=Annotation&feature=fig|6666666.640606.peg.1326&#39; target=_blank>fig|6666666.640606.peg.1326</a>, <a href=&#39;?page=Annotation&feature=fig|6666666.640606.peg.3088&#39; target=_blank>fig|6666666.640606.peg.3088</a>	yes	<a href=&#39;?page=Annotation&feature=fig|6666666.640605.peg.1158&#39; target=_blank>fig|6666666.640605.peg.1158</a>, <a href=&#39;?page=Annotation&feature=fig|6666666.640605.peg.3357&#39; target=_blank>fig|6666666.640605.peg.3357</a>	yes
A and B	Amino Acids and Derivatives	Alanine, serine, and glycine	Glycine Biosynthesis	2-amino-3-ketobutyrate coenzyme A ligase (EC 2.3.1.29)	<a href=&#39;?page=Annotation&feature=fig|6666666.640606.peg.731&#39; target=_blank>fig|6666666.640606.peg.731</a>, <a href=&#39;?page=Annotation&feature=fig|6666666.640606.peg.2370&#39; target=_blank>fig|6666666.640606.peg.2370</a>	yes	<a href=&#39;?page=Annotation&feature=fig|6666666.640605.peg.367&#39; target=_blank>fig|6666666.640605.peg.367</a>, <a href=&#39;?page=Annotation&feature=fig|6666666.640605.peg.2769&#39; target=_blank>fig|6666666.640605.peg.2769</a>	yes
A and B	Amino Acids and Derivatives	Alanine, serine, and glycine	Glycine Biosynthesis	L-threonine 3-dehydrogenase (EC 1.1.1.103)	<a href=&#39;?page=Annotation&feature=fig|6666666.640606.peg.2371&#39; target=_blank>fig|6666666.640606.peg.2371</a>	yes	<a href=&#39;?page=Annotation&feature=fig|6666666.640605.peg.368&#39; target=_blank>fig|6666666.640605.peg.368</a>	yes
A and B	Amino Acids and Derivatives	Alanine, serine, and glycine	Glycine Biosynthesis	Serine hydroxymethyltransferase (EC 2.1.2.1)	<a href=&#39;?page=Annotation&feature=fig|6666666.640606.peg.1995&#39; target=_blank>fig|6666666.640606.peg.1995</a>	yes	<a href=&#39;?page=Annotation&feature=fig|6666666.640605.peg.742&#39; target=_blank>fig|6666666.640605.peg.742</a>	yes
A and B	Amino Acids and Derivatives	Alanine, serine, and glycine	Glycine and Serine Utilization	2-amino-3-ketobutyrate coenzyme A ligase (EC 2.3.1.29)	<a href=&#39;?page=Annotation&feature=fig|6666666.640606.peg.731&#39; target=_blank>fig|6666666.640606.peg.731</a>, <a href=&#39;?page=Annotation&feature=fig|6666666.640606.peg.2370&#39; target=_blank>fig|6666666.640606.peg.2370</a>	yes	<a href=&#39;?page=Annotation&feature=fig|6666666.640605.peg.367&#39; target=_blank>fig|6666666.640605.peg.367</a>, <a href=&#39;?page=Annotation&feature=fig|6666666.640605.peg.2769&#39; target=_blank>fig|6666666.640605.peg.2769</a>	yes
A and B	Amino Acids and Derivatives	Alanine, serine, and glycine	Glycine and Serine Utilization	Aminomethyltransferase (glycine cleavage system T protein) (EC 2.1.2.10)	<a href=&#39;?page=Annotation&feature=fig|6666666.640606.peg.2458&#39; target=_blank>fig|6666666.640606.peg.2458</a>	yes	<a href=&#39;?page=Annotation&feature=fig|6666666.640605.peg.292&#39; target=_blank>fig|6666666.640605.peg.292</a>	yes
A and B	Amino Acids and Derivatives	Alanine, serine, and glycine	Glycine and Serine Utilization	Cystathionine beta-synthase (EC 4.2.1.22)	<a href=&#39;?page=Annotation&feature=fig|6666666.640606.peg.3037&#39; target=_blank>fig|6666666.640606.peg.3037</a>	yes	<a href=&#39;?page=Annotation&feature=fig|6666666.640605.peg.2184&#39; target=_blank>fig|6666666.640605.peg.2184</a>	yes
A and B	Amino Acids and Derivatives	Alanine, serine, and glycine	Glycine and Serine Utilization	Cystathionine gamma-lyase (EC 4.4.1.1)	<a href=&#39;?page=Annotation&feature=fig|6666666.640606.peg.36&#39; target=_blank>fig|6666666.640606.peg.36</a>, <a href=&#39;?page=Annotation&feature=fig|6666666.640606.peg.355&#39; target=_blank>fig|6666666.640606.peg.355</a>	yes	<a href=&#39;?page=Annotation&feature=fig|6666666.640605.peg.933&#39; target=_blank>fig|6666666.640605.peg.933</a>, <a href=&#39;?page=Annotation&feature=fig|6666666.640605.peg.1219&#39; target=_blank>fig|6666666.640605.peg.1219</a>	yes
A and B	Amino Acids and Derivatives	Alanine, serine, and glycine	Glycine and Serine Utilization	D-3-phosphoglycerate dehydrogenase (EC 1.1.1.95)	<a href=&#39;?page=Annotation&feature=fig|6666666.640606.peg.255&#39; target=_blank>fig|6666666.640606.peg.255</a>, <a href=&#39;?page=Annotation&feature=fig|6666666.640606.peg.2121&#39; target=_blank>fig|6666666.640606.peg.2121</a>, <a href=&#39;?page=Annotation&feature=fig|6666666.640606.peg.2283&#39; target=_blank>fig|6666666.640606.peg.2283</a>, <a href=&#39;?page=Annotation&feature=fig|66666…	yes	<a href=&#39;?page=Annotation&feature=fig|6666666.640605.peg.18&#39; target=_blank>fig|6666666.640605.peg.18</a>, <a href=&#39;?page=Annotation&feature=fig|6666666.640605.peg.1663&#39; target=_blank>fig|6666666.640605.peg.1663</a>, <a href=&#39;?page=Annotation&feature=fig|6666666.640605.peg.3020&#39; target=_blank>fig|6666666.640605.peg.3020</a>	yes
A and B	Amino Acids and Derivatives	Alanine, serine, and glycine	Glycine and Serine Utilization	Glycerate kinase (EC 2.7.1.31)	<a href=&#39;?page=Annotation&feature=fig|6666666.640606.peg.2209&#39; target=_blank>fig|6666666.640606.peg.2209</a>	yes	<a href=&#39;?page=Annotation&feature=fig|6666666.640605.peg.1698&#39; target=_blank>fig|6666666.640605.peg.1698</a>	yes
A and B	Amino Acids and Derivatives	Alanine, serine, and glycine	Glycine and Serine Utilization	Glycine cleavage system H protein	<a href=&#39;?page=Annotation&feature=fig|6666666.640606.peg.419&#39; target=_blank>fig|6666666.640606.peg.419</a>	yes	<a href=&#39;?page=Annotation&feature=fig|6666666.640605.peg.1460&#39; target=_blank>fig|6666666.640605.peg.1460</a>	yes
A and B	Amino Acids and Derivatives	Alanine, serine, and glycine	Glycine and Serine Utilization	Glycine dehydrogenase [decarboxylating] (glycine cleavage system P protein) (EC 1.4.4.2)	<a href=&#39;?page=Annotation&feature=fig|6666666.640606.peg.3479&#39; target=_blank>fig|6666666.640606.peg.3479</a>	yes	<a href=&#39;?page=Annotation&feature=fig|6666666.640605.peg.1991&#39; target=_blank>fig|6666666.640605.peg.1991</a>	yes
A and B	Amino Acids and Derivatives	Alanine, serine, and glycine	Glycine and Serine Utilization	L-serine dehydratase, (PLP)-dependent (EC 4.3.1.17)	<a href=&#39;?page=Annotation&feature=fig|6666666.640606.peg.1757&#39; target=_blank>fig|6666666.640606.peg.1757</a>	yes	<a href=&#39;?page=Annotation&feature=fig|6666666.640605.peg.533&#39; target=_blank>fig|6666666.640605.peg.533</a>	yes
A and B	Amino Acids and Derivatives	Alanine, serine, and glycine	Glycine and Serine Utilization	L-serine dehydratase, alpha subunit (EC 4.3.1.17)	<a href=&#39;?page=Annotation&feature=fig|6666666.640606.peg.2982&#39; target=_blank>fig|6666666.640606.peg.2982</a>	yes	<a href=&#39;?page=Annotation&feature=fig|6666666.640605.peg.1987&#39; target=_blank>fig|6666666.640605.peg.1987</a>	yes
A and B	Amino Acids and Derivatives	Alanine, serine, and glycine	Glycine and Serine Utilization	L-serine dehydratase, beta subunit (EC 4.3.1.17)	<a href=&#39;?page=Annotation&feature=fig|6666666.640606.peg.2315&#39; target=_blank>fig|6666666.640606.peg.2315</a>	yes	<a href=&#39;?page=Annotation&feature=fig|6666666.640605.peg.2953&#39; target=_blank>fig|6666666.640605.peg.2953</a>	yes
A and B	Amino Acids and Derivatives	Alanine, serine, and glycine	Glycine and Serine Utilization	Phosphoserine aminotransferase (EC 2.6.1.52)	<a href=&#39;?page=Annotation&feature=fig|6666666.640606.peg.1598&#39; target=_blank>fig|6666666.640606.peg.1598</a>	yes	<a href=&#39;?page=Annotation&feature=fig|6666666.640605.peg.2117&#39; target=_blank>fig|6666666.640605.peg.2117</a>	yes
A and B	Amino Acids and Derivatives	Alanine, serine, and glycine	Glycine and Serine Utilization	Phosphoserine phosphatase (EC 3.1.3.3)	<a href=&#39;?page=Annotation&feature=fig|6666666.640606.peg.2121&#39; target=_blank>fig|6666666.640606.peg.2121</a>	yes	<a href=&#39;?page=Annotation&feature=fig|6666666.640605.peg.3020&#39; target=_blank>fig|6666666.640605.peg.3020</a>	yes
A and B	Amino Acids and Derivatives	Alanine, serine, and glycine	Glycine and Serine Utilization	Serine hydroxymethyltransferase (EC 2.1.2.1)	<a href=&#39;?page=Annotation&feature=fig|6666666.640606.peg.1995&#39; target=_blank>fig|6666666.640606.peg.1995</a>	yes	<a href=&#39;?page=Annotation&feature=fig|6666666.640605.peg.742&#39; target=_blank>fig|6666666.640605.peg.742</a>	yes
A and B	Amino Acids and Derivatives	Alanine, serine, and glycine	Glycine and Serine Utilization	Seryl-tRNA synthetase (EC 6.1.1.11)	<a href=&#39;?page=Annotation&feature=fig|6666666.640606.peg.1361&#39; target=_blank>fig|6666666.640606.peg.1361</a>	yes	<a href=&#39;?page=Annotation&feature=fig|6666666.640605.peg.3390&#39; target=_blank>fig|6666666.640605.peg.3390</a>	yes
A and B	Amino Acids and Derivatives	Alanine, serine, and glycine	Glycine cleavage system	Aminomethyltransferase (glycine cleavage system T protein) (EC 2.1.2.10)	<a href=&#39;?page=Annotation&feature=fig|6666666.640606.peg.2458&#39; target=_blank>fig|6666666.640606.peg.2458</a>	yes	<a href=&#39;?page=Annotation&feature=fig|6666666.640605.peg.292&#39; target=_blank>fig|6666666.640605.peg.292</a>	yes
A and B	Amino Acids and Derivatives	Alanine, serine, and glycine	Glycine cleavage system	Dihydrolipoamide dehydrogenase (EC 1.8.1.4)	<a href=&#39;?page=Annotation&feature=fig|6666666.640606.peg.3411&#39; target=_blank>fig|6666666.640606.peg.3411</a>	yes	<a href=&#39;?page=Annotation&feature=fig|6666666.640605.peg.944&#39; target=_blank>fig|6666666.640605.peg.944</a>	yes
A and B	Amino Acids and Derivatives	Alanine, serine, and glycine	Glycine cleavage system	Glycine cleavage system H protein	<a href=&#39;?page=Annotation&feature=fig|6666666.640606.peg.419&#39; target=_blank>fig|6666666.640606.peg.419</a>	yes	<a href=&#39;?page=Annotation&feature=fig|6666666.640605.peg.1460&#39; target=_blank>fig|6666666.640605.peg.1460</a>	yes
A and B	Amino Acids and Derivatives	Alanine, serine, and glycine	Glycine cleavage system	Glycine dehydrogenase [decarboxylating] (glycine cleavage system P protein) (EC 1.4.4.2)	<a href=&#39;?page=Annotation&feature=fig|6666666.640606.peg.3479&#39; target=_blank>fig|6666666.640606.peg.3479</a>	yes	<a href=&#39;?page=Annotation&feature=fig|6666666.640605.peg.1991&#39; target=_blank>fig|6666666.640605.peg.1991</a>	yes
A and B	Amino Acids and Derivatives	Alanine, serine, and glycine	Serine Biosynthesis	D-3-phosphoglycerate dehydrogenase (EC 1.1.1.95)	<a href=&#39;?page=Annotation&feature=fig|6666666.640606.peg.255&#39; target=_blank>fig|6666666.640606.peg.255</a>, <a href=&#39;?page=Annotation&feature=fig|6666666.640606.peg.2121&#39; target=_blank>fig|6666666.640606.peg.2121</a>, <a href=&#39;?page=Annotation&feature=fig|6666666.640606.peg.2283&#39; target=_blank>fig|6666666.640606.peg.2283</a>, <a href=&#39;?page=Annotation&feature=fig|66666…	yes	<a href=&#39;?page=Annotation&feature=fig|6666666.640605.peg.18&#39; target=_blank>fig|6666666.640605.peg.18</a>, <a href=&#39;?page=Annotation&feature=fig|6666666.640605.peg.1663&#39; target=_blank>fig|6666666.640605.peg.1663</a>, <a href=&#39;?page=Annotation&feature=fig|6666666.640605.peg.3020&#39; target=_blank>fig|6666666.640605.peg.3020</a>	yes
A and B	Amino Acids and Derivatives	Alanine, serine, and glycine	Serine Biosynthesis	Phosphoserine aminotransferase (EC 2.6.1.52)	<a href=&#39;?page=Annotation&feature=fig|6666666.640606.peg.1598&#39; target=_blank>fig|6666666.640606.peg.1598</a>	yes	<a href=&#39;?page=Annotation&feature=fig|6666666.640605.peg.2117&#39; target=_blank>fig|6666666.640605.peg.2117</a>	yes
A and B	Amino Acids and Derivatives	Alanine, serine, and glycine	Serine Biosynthesis	Phosphoserine phosphatase (EC 3.1.3.3)	<a href=&#39;?page=Annotation&feature=fig|6666666.640606.peg.2121&#39; target=_blank>fig|6666666.640606.peg.2121</a>, <a href=&#39;?page=Annotation&feature=fig|6666666.640606.peg.2121&#39; target=_blank>fig|6666666.640606.peg.2121</a>	yes	<a href=&#39;?page=Annotation&feature=fig|6666666.640605.peg.3020&#39; target=_blank>fig|6666666.640605.peg.3020</a>, <a href=&#39;?page=Annotation&feature=fig|6666666.640605.peg.3020&#39; target=_blank>fig|6666666.640605.peg.3020</a>	yes
A and B	Amino Acids and Derivatives	Alanine, serine, and glycine	Serine Biosynthesis	Serine hydroxymethyltransferase (EC 2.1.2.1)	<a href=&#39;?page=Annotation&feature=fig|6666666.640606.peg.1995&#39; target=_blank>fig|6666666.640606.peg.1995</a>	yes	<a href=&#39;?page=Annotation&feature=fig|6666666.640605.peg.742&#39; target=_blank>fig|6666666.640605.peg.742</a>	yes
A and B	Amino Acids and Derivatives	Aromatic amino acids and derivatives	Aromatic amino acid degradation	4-hydroxyphenylpyruvate dioxygenase (EC 1.13.11.27)	<a href=&#39;?page=Annotation&feature=fig|6666666.640606.peg.2194&#39; target=_blank>fig|6666666.640606.peg.2194</a>	yes	<a href=&#39;?page=Annotation&feature=fig|6666666.640605.peg.1710&#39; target=_blank>fig|6666666.640605.peg.1710</a>	yes
A and B	Amino Acids and Derivatives	Aromatic amino acids and derivatives	Aromatic amino acid degradation	5-carboxymethyl-2-oxo-hex-3- ene-1,7-dioate decarboxylase (EC 4.1.1.68)	<a href=&#39;?page=Annotation&feature=fig|6666666.640606.peg.2651&#39; target=_blank>fig|6666666.640606.peg.2651</a>	yes	<a href=&#39;?page=Annotation&feature=fig|6666666.640605.peg.267&#39; target=_blank>fig|6666666.640605.peg.267</a>	yes
A and B	Amino Acids and Derivatives	Aromatic amino acids and derivatives	Aromatic amino acid degradation	Phenylalanine-4-hydroxylase (EC 1.14.16.1)	<a href=&#39;?page=Annotation&feature=fig|6666666.640606.peg.2798&#39; target=_blank>fig|6666666.640606.peg.2798</a>	yes	<a href=&#39;?page=Annotation&feature=fig|6666666.640605.peg.1240&#39; target=_blank>fig|6666666.640605.peg.1240</a>	yes
A and B	Amino Acids and Derivatives	Aromatic amino acids and derivatives	Aromatic amino acid degradation	Tryptophan 2,3-dioxygenase (EC 1.13.11.11)	<a href=&#39;?page=Annotation&feature=fig|6666666.640606.peg.2251&#39; target=_blank>fig|6666666.640606.peg.2251</a>	yes	<a href=&#39;?page=Annotation&feature=fig|6666666.640605.peg.10&#39; target=_blank>fig|6666666.640605.peg.10</a>	yes
A and B	Amino Acids and Derivatives	Aromatic amino acids and derivatives	Chorismate: Intermediate for synthesis of Tryptophan, PAPA antibiotics, PABA, 3-hydroxyanthranilate and more.	Anthranilate phosphoribosyltransferase (EC 2.4.2.18)	<a href=&#39;?page=Annotation&feature=fig|6666666.640606.peg.2804&#39; target=_blank>fig|6666666.640606.peg.2804</a>	yes	<a href=&#39;?page=Annotation&feature=fig|6666666.640605.peg.1233&#39; target=_blank>fig|6666666.640605.peg.1233</a>	yes
A and B	Amino Acids and Derivatives	Aromatic amino acids and derivatives	Chorismate: Intermediate for synthesis of Tryptophan, PAPA antibiotics, PABA, 3-hydroxyanthranilate and more.	Anthranilate synthase, amidotransferase component (EC 4.1.3.27)	<a href=&#39;?page=Annotation&feature=fig|6666666.640606.peg.2805&#39; target=_blank>fig|6666666.640606.peg.2805</a>	yes	<a href=&#39;?page=Annotation&feature=fig|6666666.640605.peg.1232&#39; target=_blank>fig|6666666.640605.peg.1232</a>, <a href=&#39;?page=Annotation&feature=fig|6666666.640605.peg.2152&#39; target=_blank>fig|6666666.640605.peg.2152</a>	yes
A and B	Amino Acids and Derivatives	Aromatic amino acids and derivatives	Chorismate: Intermediate for synthesis of Tryptophan, PAPA antibiotics, PABA, 3-hydroxyanthranilate and more.	Anthranilate synthase, aminase component (EC 4.1.3.27)	<a href=&#39;?page=Annotation&feature=fig|6666666.640606.peg.2806&#39; target=_blank>fig|6666666.640606.peg.2806</a>	yes	<a href=&#39;?page=Annotation&feature=fig|6666666.640605.peg.1230&#39; target=_blank>fig|6666666.640605.peg.1230</a>	yes
A and B	Amino Acids and Derivatives	Aromatic amino acids and derivatives	Chorismate: Intermediate for synthesis of Tryptophan, PAPA antibiotics, PABA, 3-hydroxyanthranilate and more.	Indole-3-glycerol phosphate synthase (EC 4.1.1.48)	<a href=&#39;?page=Annotation&feature=fig|6666666.640606.peg.2803&#39; target=_blank>fig|6666666.640606.peg.2803</a>	yes	<a href=&#39;?page=Annotation&feature=fig|6666666.640605.peg.1234&#39; target=_blank>fig|6666666.640605.peg.1234</a>	yes
A and B	Amino Acids and Derivatives	Aromatic amino acids and derivatives	Chorismate: Intermediate for synthesis of Tryptophan, PAPA antibiotics, PABA, 3-hydroxyanthranilate and more.	Isochorismate synthase (EC 5.4.4.2)	<a href=&#39;?page=Annotation&feature=fig|6666666.640606.peg.3379&#39; target=_blank>fig|6666666.640606.peg.3379</a>	yes	<a href=&#39;?page=Annotation&feature=fig|6666666.640605.peg.2516&#39; target=_blank>fig|6666666.640605.peg.2516</a>	yes
A and B	Amino Acids and Derivatives	Aromatic amino acids and derivatives	Chorismate: Intermediate for synthesis of Tryptophan, PAPA antibiotics, PABA, 3-hydroxyanthranilate and more.	Para-aminobenzoate synthase, amidotransferase component (EC 2.6.1.85)	<a href=&#39;?page=Annotation&feature=fig|6666666.640606.peg.2805&#39; target=_blank>fig|6666666.640606.peg.2805</a>	yes	<a href=&#39;?page=Annotation&feature=fig|6666666.640605.peg.1232&#39; target=_blank>fig|6666666.640605.peg.1232</a>	yes
A and B	Amino Acids and Derivatives	Aromatic amino acids and derivatives	Chorismate: Intermediate for synthesis of Tryptophan, PAPA antibiotics, PABA, 3-hydroxyanthranilate and more.	Para-aminobenzoate synthase, aminase component (EC 2.6.1.85)	<a href=&#39;?page=Annotation&feature=fig|6666666.640606.peg.3192&#39; target=_blank>fig|6666666.640606.peg.3192</a>	yes	<a href=&#39;?page=Annotation&feature=fig|6666666.640605.peg.3204&#39; target=_blank>fig|6666666.640605.peg.3204</a>	yes
A and B	Amino Acids and Derivatives	Aromatic amino acids and derivatives	Chorismate: Intermediate for synthesis of Tryptophan, PAPA antibiotics, PABA, 3-hydroxyanthranilate and more.	Phosphoribosylanthranilate isomerase (EC 5.3.1.24)	<a href=&#39;?page=Annotation&feature=fig|6666666.640606.peg.2297&#39; target=_blank>fig|6666666.640606.peg.2297</a>, <a href=&#39;?page=Annotation&feature=fig|6666666.640606.peg.2802&#39; target=_blank>fig|6666666.640606.peg.2802</a>	yes	<a href=&#39;?page=Annotation&feature=fig|6666666.640605.peg.1235&#39; target=_blank>fig|6666666.640605.peg.1235</a>	yes
A and B	Amino Acids and Derivatives	Aromatic amino acids and derivatives	Chorismate: Intermediate for synthesis of Tryptophan, PAPA antibiotics, PABA, 3-hydroxyanthranilate and more.	Phosphoribosylformimino-5-aminoimidazole carboxamide ribotide isomerase (EC 5.3.1.16)	<a href=&#39;?page=Annotation&feature=fig|6666666.640606.peg.1788&#39; target=_blank>fig|6666666.640606.peg.1788</a>, <a href=&#39;?page=Annotation&feature=fig|6666666.640606.peg.2796&#39; target=_blank>fig|6666666.640606.peg.2796</a>	yes	<a href=&#39;?page=Annotation&feature=fig|6666666.640605.peg.585&#39; target=_blank>fig|6666666.640605.peg.585</a>, <a href=&#39;?page=Annotation&feature=fig|6666666.640605.peg.1242&#39; target=_blank>fig|6666666.640605.peg.1242</a>	yes
A and B	Amino Acids and Derivatives	Aromatic amino acids and derivatives	Chorismate: Intermediate for synthesis of Tryptophan, PAPA antibiotics, PABA, 3-hydroxyanthranilate and more.	Tryptophan synthase alpha chain (EC 4.2.1.20)	<a href=&#39;?page=Annotation&feature=fig|6666666.640606.peg.2800&#39; target=_blank>fig|6666666.640606.peg.2800</a>	yes	<a href=&#39;?page=Annotation&feature=fig|6666666.640605.peg.1237&#39; target=_blank>fig|6666666.640605.peg.1237</a>	yes
A and B	Amino Acids and Derivatives	Aromatic amino acids and derivatives	Chorismate: Intermediate for synthesis of Tryptophan, PAPA antibiotics, PABA, 3-hydroxyanthranilate and more.	Tryptophan synthase beta chain (EC 4.2.1.20)	<a href=&#39;?page=Annotation&feature=fig|6666666.640606.peg.2801&#39; target=_blank>fig|6666666.640606.peg.2801</a>	yes	<a href=&#39;?page=Annotation&feature=fig|6666666.640605.peg.1236&#39; target=_blank>fig|6666666.640605.peg.1236</a>	yes
A and B	Amino Acids and Derivatives	Aromatic amino acids and derivatives	Common Pathway For Synthesis of Aromatic Compounds (DAHP synthase to chorismate)	2-keto-3-deoxy-D-arabino-heptulosonate-7-phosphate synthase I beta (EC 2.5.1.54)	<a href=&#39;?page=Annotation&feature=fig|6666666.640606.peg.582&#39; target=_blank>fig|6666666.640606.peg.582</a>, <a href=&#39;?page=Annotation&feature=fig|6666666.640606.peg.583&#39; target=_blank>fig|6666666.640606.peg.583</a>, <a href=&#39;?page=Annotation&feature=fig|6666666.640606.peg.2799&#39; target=_blank>fig|6666666.640606.peg.2799</a>	yes	<a href=&#39;?page=Annotation&feature=fig|6666666.640605.peg.323&#39; target=_blank>fig|6666666.640605.peg.323</a>, <a href=&#39;?page=Annotation&feature=fig|6666666.640605.peg.1238&#39; target=_blank>fig|6666666.640605.peg.1238</a>	yes
A and B	Amino Acids and Derivatives	Aromatic amino acids and derivatives	Common Pathway For Synthesis of Aromatic Compounds (DAHP synthase to chorismate)	3-dehydroquinate dehydratase II (EC 4.2.1.10)	<a href=&#39;?page=Annotation&feature=fig|6666666.640606.peg.1597&#39; target=_blank>fig|6666666.640606.peg.1597</a>	yes	<a href=&#39;?page=Annotation&feature=fig|6666666.640605.peg.2118&#39; target=_blank>fig|6666666.640605.peg.2118</a>	yes
A and B	Amino Acids and Derivatives	Aromatic amino acids and derivatives	Common Pathway For Synthesis of Aromatic Compounds (DAHP synthase to chorismate)	3-dehydroquinate synthase (EC 4.2.3.4)	<a href=&#39;?page=Annotation&feature=fig|6666666.640606.peg.581&#39; target=_blank>fig|6666666.640606.peg.581</a>, <a href=&#39;?page=Annotation&feature=fig|6666666.640606.peg.1143&#39; target=_blank>fig|6666666.640606.peg.1143</a>	yes	<a href=&#39;?page=Annotation&feature=fig|6666666.640605.peg.324&#39; target=_blank>fig|6666666.640605.peg.324</a>, <a href=&#39;?page=Annotation&feature=fig|6666666.640605.peg.822&#39; target=_blank>fig|6666666.640605.peg.822</a>	yes
A and B	Amino Acids and Derivatives	Aromatic amino acids and derivatives	Common Pathway For Synthesis of Aromatic Compounds (DAHP synthase to chorismate)	Chorismate synthase (EC 4.2.3.5)	<a href=&#39;?page=Annotation&feature=fig|6666666.640606.peg.1746&#39; target=_blank>fig|6666666.640606.peg.1746</a>	yes	<a href=&#39;?page=Annotation&feature=fig|6666666.640605.peg.2115&#39; target=_blank>fig|6666666.640605.peg.2115</a>	yes
A and B	Amino Acids and Derivatives	Aromatic amino acids and derivatives	Common Pathway For Synthesis of Aromatic Compounds (DAHP synthase to chorismate)	Shikimate 5-dehydrogenase I alpha (EC 1.1.1.25)	<a href=&#39;?page=Annotation&feature=fig|6666666.640606.peg.1970&#39; target=_blank>fig|6666666.640606.peg.1970</a>	yes	<a href=&#39;?page=Annotation&feature=fig|6666666.640605.peg.766&#39; target=_blank>fig|6666666.640605.peg.766</a>	yes
A and B	Amino Acids and Derivatives	Aromatic amino acids and derivatives	Common Pathway For Synthesis of Aromatic Compounds (DAHP synthase to chorismate)	Shikimate kinase I (EC 2.7.1.71)	<a href=&#39;?page=Annotation&feature=fig|6666666.640606.peg.2365&#39; target=_blank>fig|6666666.640606.peg.2365</a>	yes	<a href=&#39;?page=Annotation&feature=fig|6666666.640605.peg.362&#39; target=_blank>fig|6666666.640605.peg.362</a>	yes
A and B	Amino Acids and Derivatives	Aromatic amino acids and derivatives	Phenylalanine and Tyrosine Branches from Chorismate	Biosynthetic Aromatic amino acid aminotransferase alpha (EC 2.6.1.57)	<a href=&#39;?page=Annotation&feature=fig|6666666.640606.peg.578&#39; target=_blank>fig|6666666.640606.peg.578</a>	yes	<a href=&#39;?page=Annotation&feature=fig|6666666.640605.peg.327&#39; target=_blank>fig|6666666.640605.peg.327</a>	yes
A and B	Amino Acids and Derivatives	Aromatic amino acids and derivatives	Phenylalanine and Tyrosine Branches from Chorismate	Chorismate mutase I (EC 5.4.99.5)	<a href=&#39;?page=Annotation&feature=fig|6666666.640606.peg.582&#39; target=_blank>fig|6666666.640606.peg.582</a>, <a href=&#39;?page=Annotation&feature=fig|6666666.640606.peg.583&#39; target=_blank>fig|6666666.640606.peg.583</a>	yes	<a href=&#39;?page=Annotation&feature=fig|6666666.640605.peg.323&#39; target=_blank>fig|6666666.640605.peg.323</a>	yes
A and B	Amino Acids and Derivatives	Aromatic amino acids and derivatives	Phenylalanine and Tyrosine Branches from Chorismate	Prephenate and/or arogenate dehydrogenase (unknown specificity) (EC 1.3.1.12)(EC 1.3.1.43)	<a href=&#39;?page=Annotation&feature=fig|6666666.640606.peg.577&#39; target=_blank>fig|6666666.640606.peg.577</a>	yes	<a href=&#39;?page=Annotation&feature=fig|6666666.640605.peg.328&#39; target=_blank>fig|6666666.640605.peg.328</a>	yes
A and B	Amino Acids and Derivatives	Aromatic amino acids and derivatives	Phenylalanine and Tyrosine Branches from Chorismate	Prephenate dehydratase (EC 4.2.1.51)	<a href=&#39;?page=Annotation&feature=fig|6666666.640606.peg.579&#39; target=_blank>fig|6666666.640606.peg.579</a>	yes	<a href=&#39;?page=Annotation&feature=fig|6666666.640605.peg.326&#39; target=_blank>fig|6666666.640605.peg.326</a>	yes
A and B	Amino Acids and Derivatives	Aromatic amino acids and derivatives	Tryptophan synthesis	Anthranilate phosphoribosyltransferase (EC 2.4.2.18)	<a href=&#39;?page=Annotation&feature=fig|6666666.640606.peg.2804&#39; target=_blank>fig|6666666.640606.peg.2804</a>	yes	<a href=&#39;?page=Annotation&feature=fig|6666666.640605.peg.1233&#39; target=_blank>fig|6666666.640605.peg.1233</a>	yes
A and B	Amino Acids and Derivatives	Aromatic amino acids and derivatives	Tryptophan synthesis	Anthranilate synthase, amidotransferase component (EC 4.1.3.27)	<a href=&#39;?page=Annotation&feature=fig|6666666.640606.peg.2805&#39; target=_blank>fig|6666666.640606.peg.2805</a>	yes	<a href=&#39;?page=Annotation&feature=fig|6666666.640605.peg.1232&#39; target=_blank>fig|6666666.640605.peg.1232</a>, <a href=&#39;?page=Annotation&feature=fig|6666666.640605.peg.2152&#39; target=_blank>fig|6666666.640605.peg.2152</a>	yes
A and B	Amino Acids and Derivatives	Aromatic amino acids and derivatives	Tryptophan synthesis	Anthranilate synthase, aminase component (EC 4.1.3.27)	<a href=&#39;?page=Annotation&feature=fig|6666666.640606.peg.2806&#39; target=_blank>fig|6666666.640606.peg.2806</a>	yes	<a href=&#39;?page=Annotation&feature=fig|6666666.640605.peg.1230&#39; target=_blank>fig|6666666.640605.peg.1230</a>	yes
A and B	Amino Acids and Derivatives	Aromatic amino acids and derivatives	Tryptophan synthesis	Indole-3-glycerol phosphate synthase (EC 4.1.1.48)	<a href=&#39;?page=Annotation&feature=fig|6666666.640606.peg.2803&#39; target=_blank>fig|6666666.640606.peg.2803</a>	yes	<a href=&#39;?page=Annotation&feature=fig|6666666.640605.peg.1234&#39; target=_blank>fig|6666666.640605.peg.1234</a>	yes
A and B	Amino Acids and Derivatives	Aromatic amino acids and derivatives	Tryptophan synthesis	Para-aminobenzoate synthase, amidotransferase component (EC 2.6.1.85)	<a href=&#39;?page=Annotation&feature=fig|6666666.640606.peg.2805&#39; target=_blank>fig|6666666.640606.peg.2805</a>	yes	<a href=&#39;?page=Annotation&feature=fig|6666666.640605.peg.1232&#39; target=_blank>fig|6666666.640605.peg.1232</a>	yes
A and B	Amino Acids and Derivatives	Aromatic amino acids and derivatives	Tryptophan synthesis	Para-aminobenzoate synthase, aminase component (EC 2.6.1.85)	<a href=&#39;?page=Annotation&feature=fig|6666666.640606.peg.3192&#39; target=_blank>fig|6666666.640606.peg.3192</a>	yes	<a href=&#39;?page=Annotation&feature=fig|6666666.640605.peg.3204&#39; target=_blank>fig|6666666.640605.peg.3204</a>	yes
A and B	Amino Acids and Derivatives	Aromatic amino acids and derivatives	Tryptophan synthesis	Phosphoribosylanthranilate isomerase (EC 5.3.1.24)	<a href=&#39;?page=Annotation&feature=fig|6666666.640606.peg.2297&#39; target=_blank>fig|6666666.640606.peg.2297</a>, <a href=&#39;?page=Annotation&feature=fig|6666666.640606.peg.2802&#39; target=_blank>fig|6666666.640606.peg.2802</a>	yes	<a href=&#39;?page=Annotation&feature=fig|6666666.640605.peg.1235&#39; target=_blank>fig|6666666.640605.peg.1235</a>	yes
A and B	Amino Acids and Derivatives	Aromatic amino acids and derivatives	Tryptophan synthesis	Tryptophan synthase alpha chain (EC 4.2.1.20)	<a href=&#39;?page=Annotation&feature=fig|6666666.640606.peg.2800&#39; target=_blank>fig|6666666.640606.peg.2800</a>	yes	<a href=&#39;?page=Annotation&feature=fig|6666666.640605.peg.1237&#39; target=_blank>fig|6666666.640605.peg.1237</a>	yes
A and B	Amino Acids and Derivatives	Aromatic amino acids and derivatives	Tryptophan synthesis	Tryptophan synthase beta chain (EC 4.2.1.20)	<a href=&#39;?page=Annotation&feature=fig|6666666.640606.peg.2801&#39; target=_blank>fig|6666666.640606.peg.2801</a>	yes	<a href=&#39;?page=Annotation&feature=fig|6666666.640605.peg.1236&#39; target=_blank>fig|6666666.640605.peg.1236</a>	yes
A	Amino Acids and Derivatives	Aromatic amino acids and derivatives	Aromatic amino acid degradation	Aromatic-L-amino-acid decarboxylase (EC 4.1.1.28)	<a href=&#39;?page=Annotation&feature=fig|6666666.640606.peg.1879&#39; target=_blank>fig|6666666.640606.peg.1879</a>	yes	<input type=&#39;button&#39; class=&#39;button&#39; value=&#39;find&#39; onclick=&#39;window.open("?page=SearchGene&fr=Aromatic-L-amino-acid decarboxylase (EC 4.1.1.28)&organism=6666666.640605&subsystem=Aromatic_amino_acid_degradation&template_gene=fig|6666666.640606.peg.1879");&#39;>	no
A and B	Amino Acids and Derivatives	Branched-chain amino acids	Branched-Chain Amino Acid Biosynthesis	(R)-citramalate synthase (EC 2.3.1.182)	<a href=&#39;?page=Annotation&feature=fig|6666666.640606.peg.2932&#39; target=_blank>fig|6666666.640606.peg.2932</a>	yes	<a href=&#39;?page=Annotation&feature=fig|6666666.640605.peg.1933&#39; target=_blank>fig|6666666.640605.peg.1933</a>	yes
A and B	Amino Acids and Derivatives	Branched-chain amino acids	Branched-Chain Amino Acid Biosynthesis	2-isopropylmalate synthase (EC 2.3.3.13)	<a href=&#39;?page=Annotation&feature=fig|6666666.640606.peg.2935&#39; target=_blank>fig|6666666.640606.peg.2935</a>	yes	<a href=&#39;?page=Annotation&feature=fig|6666666.640605.peg.1936&#39; target=_blank>fig|6666666.640605.peg.1936</a>	yes
A and B	Amino Acids and Derivatives	Branched-chain amino acids	Branched-Chain Amino Acid Biosynthesis	3-isopropylmalate dehydratase large subunit (EC 4.2.1.33)	<a href=&#39;?page=Annotation&feature=fig|6666666.640606.peg.2934&#39; target=_blank>fig|6666666.640606.peg.2934</a>	yes	<a href=&#39;?page=Annotation&feature=fig|6666666.640605.peg.1935&#39; target=_blank>fig|6666666.640605.peg.1935</a>	yes
A and B	Amino Acids and Derivatives	Branched-chain amino acids	Branched-Chain Amino Acid Biosynthesis	3-isopropylmalate dehydratase small subunit (EC 4.2.1.33)	<a href=&#39;?page=Annotation&feature=fig|6666666.640606.peg.2933&#39; target=_blank>fig|6666666.640606.peg.2933</a>	yes	<a href=&#39;?page=Annotation&feature=fig|6666666.640605.peg.1934&#39; target=_blank>fig|6666666.640605.peg.1934</a>	yes
A and B	Amino Acids and Derivatives	Branched-chain amino acids	Branched-Chain Amino Acid Biosynthesis	3-isopropylmalate dehydrogenase (EC 1.1.1.85)	<a href=&#39;?page=Annotation&feature=fig|6666666.640606.peg.2931&#39; target=_blank>fig|6666666.640606.peg.2931</a>	yes	<a href=&#39;?page=Annotation&feature=fig|6666666.640605.peg.1932&#39; target=_blank>fig|6666666.640605.peg.1932</a>	yes
A and B	Amino Acids and Derivatives	Branched-chain amino acids	Branched-Chain Amino Acid Biosynthesis	Acetolactate synthase large subunit (EC 2.2.1.6)	<a href=&#39;?page=Annotation&feature=fig|6666666.640606.peg.2938&#39; target=_blank>fig|6666666.640606.peg.2938</a>	yes	<a href=&#39;?page=Annotation&feature=fig|6666666.640605.peg.1939&#39; target=_blank>fig|6666666.640605.peg.1939</a>	yes
A and B	Amino Acids and Derivatives	Branched-chain amino acids	Branched-Chain Amino Acid Biosynthesis	Acetolactate synthase small subunit (EC 2.2.1.6)	<a href=&#39;?page=Annotation&feature=fig|6666666.640606.peg.2937&#39; target=_blank>fig|6666666.640606.peg.2937</a>	yes	<a href=&#39;?page=Annotation&feature=fig|6666666.640605.peg.1938&#39; target=_blank>fig|6666666.640605.peg.1938</a>	yes
A and B	Amino Acids and Derivatives	Branched-chain amino acids	Branched-Chain Amino Acid Biosynthesis	Branched-chain amino acid aminotransferase (EC 2.6.1.42)	<a href=&#39;?page=Annotation&feature=fig|6666666.640606.peg.588&#39; target=_blank>fig|6666666.640606.peg.588</a>	yes	<a href=&#39;?page=Annotation&feature=fig|6666666.640605.peg.2591&#39; target=_blank>fig|6666666.640605.peg.2591</a>	yes
A and B	Amino Acids and Derivatives	Branched-chain amino acids	Branched-Chain Amino Acid Biosynthesis	Dihydroxy-acid dehydratase (EC 4.2.1.9)	<a href=&#39;?page=Annotation&feature=fig|6666666.640606.peg.2939&#39; target=_blank>fig|6666666.640606.peg.2939</a>	yes	<a href=&#39;?page=Annotation&feature=fig|6666666.640605.peg.1940&#39; target=_blank>fig|6666666.640605.peg.1940</a>	yes
A and B	Amino Acids and Derivatives	Branched-chain amino acids	Isoleucine degradation	3-hydroxyacyl-CoA dehydrogenase (EC 1.1.1.35)	<a href=&#39;?page=Annotation&feature=fig|6666666.640606.peg.2270&#39; target=_blank>fig|6666666.640606.peg.2270</a>	yes	<a href=&#39;?page=Annotation&feature=fig|6666666.640605.peg.1676&#39; target=_blank>fig|6666666.640605.peg.1676</a>	yes
A and B	Amino Acids and Derivatives	Branched-chain amino acids	Isoleucine degradation	Branched-chain alpha-keto acid dehydrogenase, E1 component, alpha subunit (EC 1.2.4.4)	<a href=&#39;?page=Annotation&feature=fig|6666666.640606.peg.1704&#39; target=_blank>fig|6666666.640606.peg.1704</a>, <a href=&#39;?page=Annotation&feature=fig|6666666.640606.peg.2424&#39; target=_blank>fig|6666666.640606.peg.2424</a>	yes	<a href=&#39;?page=Annotation&feature=fig|6666666.640605.peg.7&#39; target=_blank>fig|6666666.640605.peg.7</a>, <a href=&#39;?page=Annotation&feature=fig|6666666.640605.peg.1925&#39; target=_blank>fig|6666666.640605.peg.1925</a>	yes
A and B	Amino Acids and Derivatives	Branched-chain amino acids	Isoleucine degradation	Branched-chain alpha-keto acid dehydrogenase, E1 component, beta subunit (EC 1.2.4.4)	<a href=&#39;?page=Annotation&feature=fig|6666666.640606.peg.1704&#39; target=_blank>fig|6666666.640606.peg.1704</a>, <a href=&#39;?page=Annotation&feature=fig|6666666.640606.peg.2424&#39; target=_blank>fig|6666666.640606.peg.2424</a>	yes	<a href=&#39;?page=Annotation&feature=fig|6666666.640605.peg.7&#39; target=_blank>fig|6666666.640605.peg.7</a>, <a href=&#39;?page=Annotation&feature=fig|6666666.640605.peg.1925&#39; target=_blank>fig|6666666.640605.peg.1925</a>	yes
A and B	Amino Acids and Derivatives	Branched-chain amino acids	Isoleucine degradation	Branched-chain amino acid aminotransferase (EC 2.6.1.42)	<a href=&#39;?page=Annotation&feature=fig|6666666.640606.peg.588&#39; target=_blank>fig|6666666.640606.peg.588</a>	yes	<a href=&#39;?page=Annotation&feature=fig|6666666.640605.peg.2591&#39; target=_blank>fig|6666666.640605.peg.2591</a>	yes
A and B	Amino Acids and Derivatives	Branched-chain amino acids	Isoleucine degradation	Butyryl-CoA dehydrogenase (EC 1.3.8.1)	<a href=&#39;?page=Annotation&feature=fig|6666666.640606.peg.1580&#39; target=_blank>fig|6666666.640606.peg.1580</a>, <a href=&#39;?page=Annotation&feature=fig|6666666.640606.peg.1769&#39; target=_blank>fig|6666666.640606.peg.1769</a>	yes	<a href=&#39;?page=Annotation&feature=fig|6666666.640605.peg.602&#39; target=_blank>fig|6666666.640605.peg.602</a>, <a href=&#39;?page=Annotation&feature=fig|6666666.640605.peg.3473&#39; target=_blank>fig|6666666.640605.peg.3473</a>	yes
A and B	Amino Acids and Derivatives	Branched-chain amino acids	Isoleucine degradation	Dihydrolipoamide acyltransferase component of branched-chain alpha-keto acid dehydrogenase complex (EC 2.3.1.168)	<a href=&#39;?page=Annotation&feature=fig|6666666.640606.peg.688&#39; target=_blank>fig|6666666.640606.peg.688</a>	yes	<a href=&#39;?page=Annotation&feature=fig|6666666.640605.peg.53&#39; target=_blank>fig|6666666.640605.peg.53</a>	yes
A and B	Amino Acids and Derivatives	Branched-chain amino acids	Isoleucine degradation	Dihydrolipoamide dehydrogenase of branched-chain alpha-keto acid dehydrogenase (EC 1.8.1.4)	<a href=&#39;?page=Annotation&feature=fig|6666666.640606.peg.3411&#39; target=_blank>fig|6666666.640606.peg.3411</a>	yes	<a href=&#39;?page=Annotation&feature=fig|6666666.640605.peg.944&#39; target=_blank>fig|6666666.640605.peg.944</a>	yes
A and B	Amino Acids and Derivatives	Branched-chain amino acids	Isoleucine degradation	Enoyl-CoA hydratase (EC 4.2.1.17)	<a href=&#39;?page=Annotation&feature=fig|6666666.640606.peg.431&#39; target=_blank>fig|6666666.640606.peg.431</a>, <a href=&#39;?page=Annotation&feature=fig|6666666.640606.peg.2902&#39; target=_blank>fig|6666666.640606.peg.2902</a>	yes	<a href=&#39;?page=Annotation&feature=fig|6666666.640605.peg.981&#39; target=_blank>fig|6666666.640605.peg.981</a>, <a href=&#39;?page=Annotation&feature=fig|6666666.640605.peg.1472&#39; target=_blank>fig|6666666.640605.peg.1472</a>	yes
A and B	Amino Acids and Derivatives	Branched-chain amino acids	Leucine Biosynthesis	2-isopropylmalate synthase (EC 2.3.3.13)	<a href=&#39;?page=Annotation&feature=fig|6666666.640606.peg.2935&#39; target=_blank>fig|6666666.640606.peg.2935</a>	yes	<a href=&#39;?page=Annotation&feature=fig|6666666.640605.peg.1936&#39; target=_blank>fig|6666666.640605.peg.1936</a>	yes
A and B	Amino Acids and Derivatives	Branched-chain amino acids	Leucine Biosynthesis	3-isopropylmalate dehydratase large subunit (EC 4.2.1.33)	<a href=&#39;?page=Annotation&feature=fig|6666666.640606.peg.2934&#39; target=_blank>fig|6666666.640606.peg.2934</a>	yes	<a href=&#39;?page=Annotation&feature=fig|6666666.640605.peg.1935&#39; target=_blank>fig|6666666.640605.peg.1935</a>	yes
A and B	Amino Acids and Derivatives	Branched-chain amino acids	Leucine Biosynthesis	3-isopropylmalate dehydratase small subunit (EC 4.2.1.33)	<a href=&#39;?page=Annotation&feature=fig|6666666.640606.peg.2933&#39; target=_blank>fig|6666666.640606.peg.2933</a>	yes	<a href=&#39;?page=Annotation&feature=fig|6666666.640605.peg.1934&#39; target=_blank>fig|6666666.640605.peg.1934</a>	yes
A and B	Amino Acids and Derivatives	Branched-chain amino acids	Leucine Biosynthesis	3-isopropylmalate dehydrogenase (EC 1.1.1.85)	<a href=&#39;?page=Annotation&feature=fig|6666666.640606.peg.2931&#39; target=_blank>fig|6666666.640606.peg.2931</a>	yes	<a href=&#39;?page=Annotation&feature=fig|6666666.640605.peg.1932&#39; target=_blank>fig|6666666.640605.peg.1932</a>	yes
A and B	Amino Acids and Derivatives	Branched-chain amino acids	Leucine Biosynthesis	Branched-chain amino acid aminotransferase (EC 2.6.1.42)	<a href=&#39;?page=Annotation&feature=fig|6666666.640606.peg.588&#39; target=_blank>fig|6666666.640606.peg.588</a>	yes	<a href=&#39;?page=Annotation&feature=fig|6666666.640605.peg.2591&#39; target=_blank>fig|6666666.640605.peg.2591</a>	yes
A and B	Amino Acids and Derivatives	Branched-chain amino acids	Valine degradation	3-hydroxyacyl-CoA dehydrogenase (EC 1.1.1.35)	<a href=&#39;?page=Annotation&feature=fig|6666666.640606.peg.2270&#39; target=_blank>fig|6666666.640606.peg.2270</a>	yes	<a href=&#39;?page=Annotation&feature=fig|6666666.640605.peg.1676&#39; target=_blank>fig|6666666.640605.peg.1676</a>	yes
A and B	Amino Acids and Derivatives	Branched-chain amino acids	Valine degradation	Branched-chain alpha-keto acid dehydrogenase, E1 component, alpha subunit (EC 1.2.4.4)	<a href=&#39;?page=Annotation&feature=fig|6666666.640606.peg.1704&#39; target=_blank>fig|6666666.640606.peg.1704</a>, <a href=&#39;?page=Annotation&feature=fig|6666666.640606.peg.2424&#39; target=_blank>fig|6666666.640606.peg.2424</a>	yes	<a href=&#39;?page=Annotation&feature=fig|6666666.640605.peg.7&#39; target=_blank>fig|6666666.640605.peg.7</a>, <a href=&#39;?page=Annotation&feature=fig|6666666.640605.peg.1925&#39; target=_blank>fig|6666666.640605.peg.1925</a>	yes
A and B	Amino Acids and Derivatives	Branched-chain amino acids	Valine degradation	Branched-chain alpha-keto acid dehydrogenase, E1 component, beta subunit (EC 1.2.4.4)	<a href=&#39;?page=Annotation&feature=fig|6666666.640606.peg.1704&#39; target=_blank>fig|6666666.640606.peg.1704</a>, <a href=&#39;?page=Annotation&feature=fig|6666666.640606.peg.2424&#39; target=_blank>fig|6666666.640606.peg.2424</a>	yes	<a href=&#39;?page=Annotation&feature=fig|6666666.640605.peg.7&#39; target=_blank>fig|6666666.640605.peg.7</a>, <a href=&#39;?page=Annotation&feature=fig|6666666.640605.peg.1925&#39; target=_blank>fig|6666666.640605.peg.1925</a>	yes
A and B	Amino Acids and Derivatives	Branched-chain amino acids	Valine degradation	Branched-chain amino acid aminotransferase (EC 2.6.1.42)	<a href=&#39;?page=Annotation&feature=fig|6666666.640606.peg.588&#39; target=_blank>fig|6666666.640606.peg.588</a>	yes	<a href=&#39;?page=Annotation&feature=fig|6666666.640605.peg.2591&#39; target=_blank>fig|6666666.640605.peg.2591</a>	yes
A and B	Amino Acids and Derivatives	Branched-chain amino acids	Valine degradation	Butyryl-CoA dehydrogenase (EC 1.3.8.1)	<a href=&#39;?page=Annotation&feature=fig|6666666.640606.peg.1580&#39; target=_blank>fig|6666666.640606.peg.1580</a>, <a href=&#39;?page=Annotation&feature=fig|6666666.640606.peg.1769&#39; target=_blank>fig|6666666.640606.peg.1769</a>	yes	<a href=&#39;?page=Annotation&feature=fig|6666666.640605.peg.602&#39; target=_blank>fig|6666666.640605.peg.602</a>, <a href=&#39;?page=Annotation&feature=fig|6666666.640605.peg.3473&#39; target=_blank>fig|6666666.640605.peg.3473</a>	yes
A and B	Amino Acids and Derivatives	Branched-chain amino acids	Valine degradation	Dihydrolipoamide acyltransferase component of branched-chain alpha-keto acid dehydrogenase complex (EC 2.3.1.168)	<a href=&#39;?page=Annotation&feature=fig|6666666.640606.peg.688&#39; target=_blank>fig|6666666.640606.peg.688</a>	yes	<a href=&#39;?page=Annotation&feature=fig|6666666.640605.peg.53&#39; target=_blank>fig|6666666.640605.peg.53</a>	yes
A and B	Amino Acids and Derivatives	Branched-chain amino acids	Valine degradation	Dihydrolipoamide dehydrogenase of branched-chain alpha-keto acid dehydrogenase (EC 1.8.1.4)	<a href=&#39;?page=Annotation&feature=fig|6666666.640606.peg.3411&#39; target=_blank>fig|6666666.640606.peg.3411</a>	yes	<a href=&#39;?page=Annotation&feature=fig|6666666.640605.peg.944&#39; target=_blank>fig|6666666.640605.peg.944</a>	yes
A and B	Amino Acids and Derivatives	Branched-chain amino acids	Valine degradation	Enoyl-CoA hydratase (EC 4.2.1.17)	<a href=&#39;?page=Annotation&feature=fig|6666666.640606.peg.431&#39; target=_blank>fig|6666666.640606.peg.431</a>, <a href=&#39;?page=Annotation&feature=fig|6666666.640606.peg.2902&#39; target=_blank>fig|6666666.640606.peg.2902</a>	yes	<a href=&#39;?page=Annotation&feature=fig|6666666.640605.peg.981&#39; target=_blank>fig|6666666.640605.peg.981</a>, <a href=&#39;?page=Annotation&feature=fig|6666666.640605.peg.1472&#39; target=_blank>fig|6666666.640605.peg.1472</a>	yes
A and B	Amino Acids and Derivatives	Glutamine, glutamate, aspartate, asparagine; ammonia assimilation	Glutamate dehydrogenases	NAD-specific glutamate dehydrogenase (EC 1.4.1.2)	<a href=&#39;?page=Annotation&feature=fig|6666666.640606.peg.943&#39; target=_blank>fig|6666666.640606.peg.943</a>	yes	<a href=&#39;?page=Annotation&feature=fig|6666666.640605.peg.2075&#39; target=_blank>fig|6666666.640605.peg.2075</a>	yes
A and B	Amino Acids and Derivatives	Glutamine, glutamate, aspartate, asparagine; ammonia assimilation	Glutamate dehydrogenases	NADP-specific glutamate dehydrogenase (EC 1.4.1.4)	<a href=&#39;?page=Annotation&feature=fig|6666666.640606.peg.943&#39; target=_blank>fig|6666666.640606.peg.943</a>	yes	<a href=&#39;?page=Annotation&feature=fig|6666666.640605.peg.2075&#39; target=_blank>fig|6666666.640605.peg.2075</a>	yes
A and B	Amino Acids and Derivatives	Glutamine, glutamate, aspartate, asparagine; ammonia assimilation	Glutamine, Glutamate, Aspartate and Asparagine Biosynthesis	Asparagine synthetase [glutamine-hydrolyzing] (EC 6.3.5.4)	<a href=&#39;?page=Annotation&feature=fig|6666666.640606.peg.1833&#39; target=_blank>fig|6666666.640606.peg.1833</a>, <a href=&#39;?page=Annotation&feature=fig|6666666.640606.peg.2542&#39; target=_blank>fig|6666666.640606.peg.2542</a>, <a href=&#39;?page=Annotation&feature=fig|6666666.640606.peg.2553&#39; target=_blank>fig|6666666.640606.peg.2553</a>, <a href=&#39;?page=Annotation&feature=fig|666…	yes	<a href=&#39;?page=Annotation&feature=fig|6666666.640605.peg.2853&#39; target=_blank>fig|6666666.640605.peg.2853</a>	yes
A and B	Amino Acids and Derivatives	Glutamine, glutamate, aspartate, asparagine; ammonia assimilation	Glutamine, Glutamate, Aspartate and Asparagine Biosynthesis	Aspartate aminotransferase (EC 2.6.1.1)	<a href=&#39;?page=Annotation&feature=fig|6666666.640606.peg.557&#39; target=_blank>fig|6666666.640606.peg.557</a>, <a href=&#39;?page=Annotation&feature=fig|6666666.640606.peg.578&#39; target=_blank>fig|6666666.640606.peg.578</a>, <a href=&#39;?page=Annotation&feature=fig|6666666.640606.peg.3462&#39; target=_blank>fig|6666666.640606.peg.3462</a>	yes	<a href=&#39;?page=Annotation&feature=fig|6666666.640605.peg.327&#39; target=_blank>fig|6666666.640605.peg.327</a>, <a href=&#39;?page=Annotation&feature=fig|6666666.640605.peg.2705&#39; target=_blank>fig|6666666.640605.peg.2705</a>, <a href=&#39;?page=Annotation&feature=fig|6666666.640605.peg.3132&#39; target=_blank>fig|6666666.640605.peg.3132</a>	yes
A and B	Amino Acids and Derivatives	Glutamine, glutamate, aspartate, asparagine; ammonia assimilation	Glutamine, Glutamate, Aspartate and Asparagine Biosynthesis	Ferredoxin-dependent glutamate synthase (EC 1.4.7.1)	<a href=&#39;?page=Annotation&feature=fig|6666666.640606.peg.811&#39; target=_blank>fig|6666666.640606.peg.811</a>	yes	<a href=&#39;?page=Annotation&feature=fig|6666666.640605.peg.1873&#39; target=_blank>fig|6666666.640605.peg.1873</a>	yes
A and B	Amino Acids and Derivatives	Glutamine, glutamate, aspartate, asparagine; ammonia assimilation	Glutamine, Glutamate, Aspartate and Asparagine Biosynthesis	Glutamate synthase [NADPH] large chain (EC 1.4.1.13)	<a href=&#39;?page=Annotation&feature=fig|6666666.640606.peg.1244&#39; target=_blank>fig|6666666.640606.peg.1244</a>	yes	<a href=&#39;?page=Annotation&feature=fig|6666666.640605.peg.3314&#39; target=_blank>fig|6666666.640605.peg.3314</a>	yes
A and B	Amino Acids and Derivatives	Glutamine, glutamate, aspartate, asparagine; ammonia assimilation	Glutamine, Glutamate, Aspartate and Asparagine Biosynthesis	Glutamate synthase [NADPH] small chain (EC 1.4.1.13)	<a href=&#39;?page=Annotation&feature=fig|6666666.640606.peg.1245&#39; target=_blank>fig|6666666.640606.peg.1245</a>	yes	<a href=&#39;?page=Annotation&feature=fig|6666666.640605.peg.3313&#39; target=_blank>fig|6666666.640605.peg.3313</a>	yes
A and B	Amino Acids and Derivatives	Glutamine, glutamate, aspartate, asparagine; ammonia assimilation	Glutamine, Glutamate, Aspartate and Asparagine Biosynthesis	Glutamine synthetase type III, GlnN (EC 6.3.1.2)	<a href=&#39;?page=Annotation&feature=fig|6666666.640606.peg.3357&#39; target=_blank>fig|6666666.640606.peg.3357</a>	yes	<a href=&#39;?page=Annotation&feature=fig|6666666.640605.peg.173&#39; target=_blank>fig|6666666.640605.peg.173</a>	yes
A and B	Amino Acids and Derivatives	Glutamine, glutamate, aspartate, asparagine; ammonia assimilation	Glutamine, Glutamate, Aspartate and Asparagine Biosynthesis	L-asparaginase I, cytoplasmic (EC 3.5.1.1)	<a href=&#39;?page=Annotation&feature=fig|6666666.640606.peg.107&#39; target=_blank>fig|6666666.640606.peg.107</a>	yes	<a href=&#39;?page=Annotation&feature=fig|6666666.640605.peg.1016&#39; target=_blank>fig|6666666.640605.peg.1016</a>	yes
A and B	Amino Acids and Derivatives	Glutamine, glutamate, aspartate, asparagine; ammonia assimilation	Glutamine, Glutamate, Aspartate and Asparagine Biosynthesis	NAD-specific glutamate dehydrogenase (EC 1.4.1.2)	<a href=&#39;?page=Annotation&feature=fig|6666666.640606.peg.943&#39; target=_blank>fig|6666666.640606.peg.943</a>	yes	<a href=&#39;?page=Annotation&feature=fig|6666666.640605.peg.2075&#39; target=_blank>fig|6666666.640605.peg.2075</a>	yes
A and B	Amino Acids and Derivatives	Glutamine, glutamate, aspartate, asparagine; ammonia assimilation	Glutamine, Glutamate, Aspartate and Asparagine Biosynthesis	NADP-specific glutamate dehydrogenase (EC 1.4.1.4)	<a href=&#39;?page=Annotation&feature=fig|6666666.640606.peg.943&#39; target=_blank>fig|6666666.640606.peg.943</a>	yes	<a href=&#39;?page=Annotation&feature=fig|6666666.640605.peg.2075&#39; target=_blank>fig|6666666.640605.peg.2075</a>	yes
A and B	Amino Acids and Derivatives	Glutamine, glutamate, aspartate, asparagine; ammonia assimilation	Glutamine synthetases	Glutamine synthetase type III, GlnN (EC 6.3.1.2)	<a href=&#39;?page=Annotation&feature=fig|6666666.640606.peg.3357&#39; target=_blank>fig|6666666.640606.peg.3357</a>	yes	<a href=&#39;?page=Annotation&feature=fig|6666666.640605.peg.173&#39; target=_blank>fig|6666666.640605.peg.173</a>	yes
A	Amino Acids and Derivatives	Glutamine, glutamate, aspartate, asparagine; ammonia assimilation	Glutamine, Glutamate, Aspartate and Asparagine Biosynthesis	Glutaminase (EC 3.5.1.2)	<a href=&#39;?page=Annotation&feature=fig|6666666.640606.peg.180&#39; target=_blank>fig|6666666.640606.peg.180</a>	yes	<input type=&#39;button&#39; class=&#39;button&#39; value=&#39;find&#39; onclick=&#39;window.open("?page=SearchGene&fr=Glutaminase (EC 3.5.1.2)&organism=6666666.640605&subsystem=Glutamine,_Glutamate,_Aspartate_and_Asparagine_Biosynthesis&template_gene=fig|6666666.640606.peg.180");&#39;>	no
A and B	Amino Acids and Derivatives	Histidine Metabolism	Histidine Biosynthesis	Histidinol dehydrogenase (EC 1.1.1.23)	<a href=&#39;?page=Annotation&feature=fig|6666666.640606.peg.700&#39; target=_blank>fig|6666666.640606.peg.700</a>	yes	<a href=&#39;?page=Annotation&feature=fig|6666666.640605.peg.40&#39; target=_blank>fig|6666666.640605.peg.40</a>	yes
A and B	Amino Acids and Derivatives	Histidine Metabolism	Histidine Biosynthesis	Histidinol-phosphatase (EC 3.1.3.15)	<a href=&#39;?page=Annotation&feature=fig|6666666.640606.peg.698&#39; target=_blank>fig|6666666.640606.peg.698</a>	yes	<a href=&#39;?page=Annotation&feature=fig|6666666.640605.peg.42&#39; target=_blank>fig|6666666.640605.peg.42</a>	yes
A and B	Amino Acids and Derivatives	Histidine Metabolism	Histidine Biosynthesis	Histidinol-phosphate aminotransferase (EC 2.6.1.9)	<a href=&#39;?page=Annotation&feature=fig|6666666.640606.peg.699&#39; target=_blank>fig|6666666.640606.peg.699</a>	yes	<a href=&#39;?page=Annotation&feature=fig|6666666.640605.peg.41&#39; target=_blank>fig|6666666.640605.peg.41</a>	yes
A and B	Amino Acids and Derivatives	Histidine Metabolism	Histidine Biosynthesis	Imidazoleglycerol-phosphate dehydratase (EC 4.2.1.19)	<a href=&#39;?page=Annotation&feature=fig|6666666.640606.peg.698&#39; target=_blank>fig|6666666.640606.peg.698</a>	yes	<a href=&#39;?page=Annotation&feature=fig|6666666.640605.peg.42&#39; target=_blank>fig|6666666.640605.peg.42</a>	yes
A and B	Amino Acids and Derivatives	Histidine Metabolism	Histidine Biosynthesis	Phosphoribosyl-AMP cyclohydrolase (EC 3.5.4.19)	<a href=&#39;?page=Annotation&feature=fig|6666666.640606.peg.2794&#39; target=_blank>fig|6666666.640606.peg.2794</a>	yes	<a href=&#39;?page=Annotation&feature=fig|6666666.640605.peg.1244&#39; target=_blank>fig|6666666.640605.peg.1244</a>	yes
A and B	Amino Acids and Derivatives	Histidine Metabolism	Histidine Biosynthesis	Phosphoribosyl-ATP pyrophosphatase (EC 3.6.1.31)	<a href=&#39;?page=Annotation&feature=fig|6666666.640606.peg.2794&#39; target=_blank>fig|6666666.640606.peg.2794</a>	yes	<a href=&#39;?page=Annotation&feature=fig|6666666.640605.peg.1244&#39; target=_blank>fig|6666666.640605.peg.1244</a>	yes
A and B	Amino Acids and Derivatives	Histidine Metabolism	Histidine Biosynthesis	Phosphoribosylformimino-5-aminoimidazole carboxamide ribotide isomerase (EC 5.3.1.16)	<a href=&#39;?page=Annotation&feature=fig|6666666.640606.peg.1788&#39; target=_blank>fig|6666666.640606.peg.1788</a>, <a href=&#39;?page=Annotation&feature=fig|6666666.640606.peg.2796&#39; target=_blank>fig|6666666.640606.peg.2796</a>	yes	<a href=&#39;?page=Annotation&feature=fig|6666666.640605.peg.585&#39; target=_blank>fig|6666666.640605.peg.585</a>, <a href=&#39;?page=Annotation&feature=fig|6666666.640605.peg.1242&#39; target=_blank>fig|6666666.640605.peg.1242</a>	yes
A and B	Amino Acids and Derivatives	Histidine Metabolism	Histidine Degradation	Formiminoglutamase (EC 3.5.3.8)	<a href=&#39;?page=Annotation&feature=fig|6666666.640606.peg.1343&#39; target=_blank>fig|6666666.640606.peg.1343</a>, <a href=&#39;?page=Annotation&feature=fig|6666666.640606.peg.3388&#39; target=_blank>fig|6666666.640606.peg.3388</a>	yes	<a href=&#39;?page=Annotation&feature=fig|6666666.640605.peg.2508&#39; target=_blank>fig|6666666.640605.peg.2508</a>, <a href=&#39;?page=Annotation&feature=fig|6666666.640605.peg.3374&#39; target=_blank>fig|6666666.640605.peg.3374</a>	yes
A and B	Amino Acids and Derivatives	Histidine Metabolism	Histidine Degradation	Histidine ammonia-lyase (EC 4.3.1.3)	<a href=&#39;?page=Annotation&feature=fig|6666666.640606.peg.3384&#39; target=_blank>fig|6666666.640606.peg.3384</a>	yes	<a href=&#39;?page=Annotation&feature=fig|6666666.640605.peg.2511&#39; target=_blank>fig|6666666.640605.peg.2511</a>	yes
A and B	Amino Acids and Derivatives	Histidine Metabolism	Histidine Degradation	Imidazolonepropionase (EC 3.5.2.7)	<a href=&#39;?page=Annotation&feature=fig|6666666.640606.peg.3385&#39; target=_blank>fig|6666666.640606.peg.3385</a>	yes	<a href=&#39;?page=Annotation&feature=fig|6666666.640605.peg.2510&#39; target=_blank>fig|6666666.640605.peg.2510</a>	yes
A and B	Amino Acids and Derivatives	Histidine Metabolism	Histidine Degradation	Urocanate hydratase (EC 4.2.1.49)	<a href=&#39;?page=Annotation&feature=fig|6666666.640606.peg.3386&#39; target=_blank>fig|6666666.640606.peg.3386</a>	yes	<a href=&#39;?page=Annotation&feature=fig|6666666.640605.peg.2509&#39; target=_blank>fig|6666666.640605.peg.2509</a>	yes
A and B	Amino Acids and Derivatives	Lysine, threonine, methionine, and cysteine	Cysteine Biosynthesis	Cystathionine beta-synthase (EC 4.2.1.22)	<a href=&#39;?page=Annotation&feature=fig|6666666.640606.peg.3037&#39; target=_blank>fig|6666666.640606.peg.3037</a>	yes	<a href=&#39;?page=Annotation&feature=fig|6666666.640605.peg.2184&#39; target=_blank>fig|6666666.640605.peg.2184</a>	yes
A and B	Amino Acids and Derivatives	Lysine, threonine, methionine, and cysteine	Cysteine Biosynthesis	Cystathionine gamma-lyase (EC 4.4.1.1)	<a href=&#39;?page=Annotation&feature=fig|6666666.640606.peg.36&#39; target=_blank>fig|6666666.640606.peg.36</a>, <a href=&#39;?page=Annotation&feature=fig|6666666.640606.peg.355&#39; target=_blank>fig|6666666.640606.peg.355</a>	yes	<a href=&#39;?page=Annotation&feature=fig|6666666.640605.peg.933&#39; target=_blank>fig|6666666.640605.peg.933</a>, <a href=&#39;?page=Annotation&feature=fig|6666666.640605.peg.1219&#39; target=_blank>fig|6666666.640605.peg.1219</a>	yes
A and B	Amino Acids and Derivatives	Lysine, threonine, methionine, and cysteine	Cysteine Biosynthesis	Cysteine synthase (EC 2.5.1.47)	<a href=&#39;?page=Annotation&feature=fig|6666666.640606.peg.1663&#39; target=_blank>fig|6666666.640606.peg.1663</a>	yes	<a href=&#39;?page=Annotation&feature=fig|6666666.640605.peg.3677&#39; target=_blank>fig|6666666.640605.peg.3677</a>	yes
A and B	Amino Acids and Derivatives	Lysine, threonine, methionine, and cysteine	Cysteine Biosynthesis	Serine acetyltransferase (EC 2.3.1.30)	<a href=&#39;?page=Annotation&feature=fig|6666666.640606.peg.1662&#39; target=_blank>fig|6666666.640606.peg.1662</a>	yes	<a href=&#39;?page=Annotation&feature=fig|6666666.640605.peg.3676&#39; target=_blank>fig|6666666.640605.peg.3676</a>	yes
A and B	Amino Acids and Derivatives	Lysine, threonine, methionine, and cysteine	Cysteine Biosynthesis	Sulfate adenylyltransferase subunit 1 (EC 2.7.7.4)	<a href=&#39;?page=Annotation&feature=fig|6666666.640606.peg.1070&#39; target=_blank>fig|6666666.640606.peg.1070</a>	yes	<a href=&#39;?page=Annotation&feature=fig|6666666.640605.peg.2166&#39; target=_blank>fig|6666666.640605.peg.2166</a>	yes
A and B	Amino Acids and Derivatives	Lysine, threonine, methionine, and cysteine	Cysteine Biosynthesis	Sulfate adenylyltransferase subunit 2 (EC 2.7.7.4)	<a href=&#39;?page=Annotation&feature=fig|6666666.640606.peg.1071&#39; target=_blank>fig|6666666.640606.peg.1071</a>	yes	<a href=&#39;?page=Annotation&feature=fig|6666666.640605.peg.2165&#39; target=_blank>fig|6666666.640605.peg.2165</a>	yes
A and B	Amino Acids and Derivatives	Lysine, threonine, methionine, and cysteine	Cysteine Biosynthesis	Sulfate permease	<a href=&#39;?page=Annotation&feature=fig|6666666.640606.peg.250&#39; target=_blank>fig|6666666.640606.peg.250</a>	yes	<a href=&#39;?page=Annotation&feature=fig|6666666.640605.peg.667&#39; target=_blank>fig|6666666.640605.peg.667</a>	yes
A and B	Amino Acids and Derivatives	Lysine, threonine, methionine, and cysteine	Lysine Biosynthesis DAP Pathway	2,3,4,5-tetrahydropyridine-2,6-dicarboxylate N-succinyltransferase (EC 2.3.1.117)	<a href=&#39;?page=Annotation&feature=fig|6666666.640606.peg.802&#39; target=_blank>fig|6666666.640606.peg.802</a>	yes	<a href=&#39;?page=Annotation&feature=fig|6666666.640605.peg.1881&#39; target=_blank>fig|6666666.640605.peg.1881</a>	yes
A and B	Amino Acids and Derivatives	Lysine, threonine, methionine, and cysteine	Lysine Biosynthesis DAP Pathway	4-hydroxy-tetrahydrodipicolinate reductase (EC 1.17.1.8)	<a href=&#39;?page=Annotation&feature=fig|6666666.640606.peg.3672&#39; target=_blank>fig|6666666.640606.peg.3672</a>	yes	<a href=&#39;?page=Annotation&feature=fig|6666666.640605.peg.3820&#39; target=_blank>fig|6666666.640605.peg.3820</a>	yes
A and B	Amino Acids and Derivatives	Lysine, threonine, methionine, and cysteine	Lysine Biosynthesis DAP Pathway	4-hydroxy-tetrahydrodipicolinate synthase (EC 4.3.3.7)	<a href=&#39;?page=Annotation&feature=fig|6666666.640606.peg.3215&#39; target=_blank>fig|6666666.640606.peg.3215</a>	yes	<a href=&#39;?page=Annotation&feature=fig|6666666.640605.peg.454&#39; target=_blank>fig|6666666.640605.peg.454</a>	yes
A and B	Amino Acids and Derivatives	Lysine, threonine, methionine, and cysteine	Lysine Biosynthesis DAP Pathway	Aspartate-semialdehyde dehydrogenase (EC 1.2.1.11)	<a href=&#39;?page=Annotation&feature=fig|6666666.640606.peg.1519&#39; target=_blank>fig|6666666.640606.peg.1519</a>	yes	<a href=&#39;?page=Annotation&feature=fig|6666666.640605.peg.3502&#39; target=_blank>fig|6666666.640605.peg.3502</a>	yes
A and B	Amino Acids and Derivatives	Lysine, threonine, methionine, and cysteine	Lysine Biosynthesis DAP Pathway	Aspartokinase (EC 2.7.2.4)	<a href=&#39;?page=Annotation&feature=fig|6666666.640606.peg.1734&#39; target=_blank>fig|6666666.640606.peg.1734</a>, <a href=&#39;?page=Annotation&feature=fig|6666666.640606.peg.3497&#39; target=_blank>fig|6666666.640606.peg.3497</a>, <a href=&#39;?page=Annotation&feature=fig|6666666.640606.peg.3507&#39; target=_blank>fig|6666666.640606.peg.3507</a>	yes	<a href=&#39;?page=Annotation&feature=fig|6666666.640605.peg.2008&#39; target=_blank>fig|6666666.640605.peg.2008</a>, <a href=&#39;?page=Annotation&feature=fig|6666666.640605.peg.2021&#39; target=_blank>fig|6666666.640605.peg.2021</a>, <a href=&#39;?page=Annotation&feature=fig|6666666.640605.peg.2105&#39; target=_blank>fig|6666666.640605.peg.2105</a>	yes
A and B	Amino Acids and Derivatives	Lysine, threonine, methionine, and cysteine	Lysine Biosynthesis DAP Pathway	Diaminopimelate decarboxylase (EC 4.1.1.20)	<a href=&#39;?page=Annotation&feature=fig|6666666.640606.peg.1723&#39; target=_blank>fig|6666666.640606.peg.1723</a>	yes	<a href=&#39;?page=Annotation&feature=fig|6666666.640605.peg.2825&#39; target=_blank>fig|6666666.640605.peg.2825</a>	yes
A and B	Amino Acids and Derivatives	Lysine, threonine, methionine, and cysteine	Lysine Biosynthesis DAP Pathway	Diaminopimelate epimerase (EC 5.1.1.7)	<a href=&#39;?page=Annotation&feature=fig|6666666.640606.peg.1893&#39; target=_blank>fig|6666666.640606.peg.1893</a>	yes	<a href=&#39;?page=Annotation&feature=fig|6666666.640605.peg.845&#39; target=_blank>fig|6666666.640605.peg.845</a>	yes
A and B	Amino Acids and Derivatives	Lysine, threonine, methionine, and cysteine	Lysine Biosynthesis DAP Pathway, GJO scratch	2,3,4,5-tetrahydropyridine-2,6-dicarboxylate N-succinyltransferase (EC 2.3.1.117)	<a href=&#39;?page=Annotation&feature=fig|6666666.640606.peg.802&#39; target=_blank>fig|6666666.640606.peg.802</a>	yes	<a href=&#39;?page=Annotation&feature=fig|6666666.640605.peg.1881&#39; target=_blank>fig|6666666.640605.peg.1881</a>	yes
A and B	Amino Acids and Derivatives	Lysine, threonine, methionine, and cysteine	Lysine Biosynthesis DAP Pathway, GJO scratch	4-hydroxy-tetrahydrodipicolinate reductase (EC 1.17.1.8)	<a href=&#39;?page=Annotation&feature=fig|6666666.640606.peg.3672&#39; target=_blank>fig|6666666.640606.peg.3672</a>	yes	<a href=&#39;?page=Annotation&feature=fig|6666666.640605.peg.3820&#39; target=_blank>fig|6666666.640605.peg.3820</a>	yes
A and B	Amino Acids and Derivatives	Lysine, threonine, methionine, and cysteine	Lysine Biosynthesis DAP Pathway, GJO scratch	4-hydroxy-tetrahydrodipicolinate synthase (EC 4.3.3.7)	<a href=&#39;?page=Annotation&feature=fig|6666666.640606.peg.3215&#39; target=_blank>fig|6666666.640606.peg.3215</a>	yes	<a href=&#39;?page=Annotation&feature=fig|6666666.640605.peg.454&#39; target=_blank>fig|6666666.640605.peg.454</a>	yes
A and B	Amino Acids and Derivatives	Lysine, threonine, methionine, and cysteine	Lysine Biosynthesis DAP Pathway, GJO scratch	Aspartate-semialdehyde dehydrogenase (EC 1.2.1.11)	<a href=&#39;?page=Annotation&feature=fig|6666666.640606.peg.1519&#39; target=_blank>fig|6666666.640606.peg.1519</a>	yes	<a href=&#39;?page=Annotation&feature=fig|6666666.640605.peg.3502&#39; target=_blank>fig|6666666.640605.peg.3502</a>	yes
A and B	Amino Acids and Derivatives	Lysine, threonine, methionine, and cysteine	Lysine Biosynthesis DAP Pathway, GJO scratch	Aspartokinase (EC 2.7.2.4)	<a href=&#39;?page=Annotation&feature=fig|6666666.640606.peg.1734&#39; target=_blank>fig|6666666.640606.peg.1734</a>, <a href=&#39;?page=Annotation&feature=fig|6666666.640606.peg.3497&#39; target=_blank>fig|6666666.640606.peg.3497</a>, <a href=&#39;?page=Annotation&feature=fig|6666666.640606.peg.3507&#39; target=_blank>fig|6666666.640606.peg.3507</a>	yes	<a href=&#39;?page=Annotation&feature=fig|6666666.640605.peg.2008&#39; target=_blank>fig|6666666.640605.peg.2008</a>, <a href=&#39;?page=Annotation&feature=fig|6666666.640605.peg.2021&#39; target=_blank>fig|6666666.640605.peg.2021</a>, <a href=&#39;?page=Annotation&feature=fig|6666666.640605.peg.2105&#39; target=_blank>fig|6666666.640605.peg.2105</a>	yes
A and B	Amino Acids and Derivatives	Lysine, threonine, methionine, and cysteine	Lysine Biosynthesis DAP Pathway, GJO scratch	Diaminopimelate decarboxylase (EC 4.1.1.20)	<a href=&#39;?page=Annotation&feature=fig|6666666.640606.peg.1723&#39; target=_blank>fig|6666666.640606.peg.1723</a>	yes	<a href=&#39;?page=Annotation&feature=fig|6666666.640605.peg.2825&#39; target=_blank>fig|6666666.640605.peg.2825</a>	yes
A and B	Amino Acids and Derivatives	Lysine, threonine, methionine, and cysteine	Lysine Biosynthesis DAP Pathway, GJO scratch	Diaminopimelate epimerase (EC 5.1.1.7)	<a href=&#39;?page=Annotation&feature=fig|6666666.640606.peg.1893&#39; target=_blank>fig|6666666.640606.peg.1893</a>	yes	<a href=&#39;?page=Annotation&feature=fig|6666666.640605.peg.845&#39; target=_blank>fig|6666666.640605.peg.845</a>	yes
A and B	Amino Acids and Derivatives	Lysine, threonine, methionine, and cysteine	Methionine Biosynthesis	5,10-methylenetetrahydrofolate reductase (EC 1.5.1.20)	<a href=&#39;?page=Annotation&feature=fig|6666666.640606.peg.614&#39; target=_blank>fig|6666666.640606.peg.614</a>	yes	<a href=&#39;?page=Annotation&feature=fig|6666666.640605.peg.1632&#39; target=_blank>fig|6666666.640605.peg.1632</a>	yes
A and B	Amino Acids and Derivatives	Lysine, threonine, methionine, and cysteine	Methionine Biosynthesis	5-methyltetrahydrofolate--homocysteine methyltransferase (EC 2.1.1.13)	<a href=&#39;?page=Annotation&feature=fig|6666666.640606.peg.612&#39; target=_blank>fig|6666666.640606.peg.612</a>	yes	<a href=&#39;?page=Annotation&feature=fig|6666666.640605.peg.1630&#39; target=_blank>fig|6666666.640605.peg.1630</a>	yes
A and B	Amino Acids and Derivatives	Lysine, threonine, methionine, and cysteine	Methionine Biosynthesis	Adenosylhomocysteinase (EC 3.3.1.1)	<a href=&#39;?page=Annotation&feature=fig|6666666.640606.peg.387&#39; target=_blank>fig|6666666.640606.peg.387</a>	yes	<a href=&#39;?page=Annotation&feature=fig|6666666.640605.peg.1434&#39; target=_blank>fig|6666666.640605.peg.1434</a>	yes
A and B	Amino Acids and Derivatives	Lysine, threonine, methionine, and cysteine	Methionine Biosynthesis	Cystathionine beta-synthase (EC 4.2.1.22)	<a href=&#39;?page=Annotation&feature=fig|6666666.640606.peg.3037&#39; target=_blank>fig|6666666.640606.peg.3037</a>	yes	<a href=&#39;?page=Annotation&feature=fig|6666666.640605.peg.2184&#39; target=_blank>fig|6666666.640605.peg.2184</a>	yes
A and B	Amino Acids and Derivatives	Lysine, threonine, methionine, and cysteine	Methionine Biosynthesis	Cystathionine gamma-lyase (EC 4.4.1.1)	<a href=&#39;?page=Annotation&feature=fig|6666666.640606.peg.36&#39; target=_blank>fig|6666666.640606.peg.36</a>, <a href=&#39;?page=Annotation&feature=fig|6666666.640606.peg.355&#39; target=_blank>fig|6666666.640606.peg.355</a>	yes	<a href=&#39;?page=Annotation&feature=fig|6666666.640605.peg.933&#39; target=_blank>fig|6666666.640605.peg.933</a>, <a href=&#39;?page=Annotation&feature=fig|6666666.640605.peg.1219&#39; target=_blank>fig|6666666.640605.peg.1219</a>	yes
A and B	Amino Acids and Derivatives	Lysine, threonine, methionine, and cysteine	Methionine Biosynthesis	Cystathionine gamma-synthase (EC 2.5.1.48)	<a href=&#39;?page=Annotation&feature=fig|6666666.640606.peg.1780&#39; target=_blank>fig|6666666.640606.peg.1780</a>	yes	<a href=&#39;?page=Annotation&feature=fig|6666666.640605.peg.592&#39; target=_blank>fig|6666666.640605.peg.592</a>	yes
A and B	Amino Acids and Derivatives	Lysine, threonine, methionine, and cysteine	Methionine Biosynthesis	Cysteine synthase (EC 2.5.1.47)	<a href=&#39;?page=Annotation&feature=fig|6666666.640606.peg.1663&#39; target=_blank>fig|6666666.640606.peg.1663</a>	yes	<a href=&#39;?page=Annotation&feature=fig|6666666.640605.peg.3677&#39; target=_blank>fig|6666666.640605.peg.3677</a>	yes
A and B	Amino Acids and Derivatives	Lysine, threonine, methionine, and cysteine	Methionine Biosynthesis	Homoserine O-acetyltransferase (EC 2.3.1.31)	<a href=&#39;?page=Annotation&feature=fig|6666666.640606.peg.887&#39; target=_blank>fig|6666666.640606.peg.887</a>	yes	<a href=&#39;?page=Annotation&feature=fig|6666666.640605.peg.1765&#39; target=_blank>fig|6666666.640605.peg.1765</a>	yes
A and B	Amino Acids and Derivatives	Lysine, threonine, methionine, and cysteine	Methionine Biosynthesis	Homoserine dehydrogenase (EC 1.1.1.3)	<a href=&#39;?page=Annotation&feature=fig|6666666.640606.peg.3507&#39; target=_blank>fig|6666666.640606.peg.3507</a>	yes	<a href=&#39;?page=Annotation&feature=fig|6666666.640605.peg.2021&#39; target=_blank>fig|6666666.640605.peg.2021</a>	yes
A and B	Amino Acids and Derivatives	Lysine, threonine, methionine, and cysteine	Methionine Biosynthesis	Homoserine kinase (EC 2.7.1.39)	<a href=&#39;?page=Annotation&feature=fig|6666666.640606.peg.3506&#39; target=_blank>fig|6666666.640606.peg.3506</a>	yes	<a href=&#39;?page=Annotation&feature=fig|6666666.640605.peg.2020&#39; target=_blank>fig|6666666.640605.peg.2020</a>	yes
A and B	Amino Acids and Derivatives	Lysine, threonine, methionine, and cysteine	Methionine Biosynthesis	O-acetylhomoserine sulfhydrylase (EC 2.5.1.49)	<a href=&#39;?page=Annotation&feature=fig|6666666.640606.peg.886&#39; target=_blank>fig|6666666.640606.peg.886</a>, <a href=&#39;?page=Annotation&feature=fig|6666666.640606.peg.3654&#39; target=_blank>fig|6666666.640606.peg.3654</a>	yes	<a href=&#39;?page=Annotation&feature=fig|6666666.640605.peg.1766&#39; target=_blank>fig|6666666.640605.peg.1766</a>, <a href=&#39;?page=Annotation&feature=fig|6666666.640605.peg.3836&#39; target=_blank>fig|6666666.640605.peg.3836</a>	yes
A and B	Amino Acids and Derivatives	Lysine, threonine, methionine, and cysteine	Methionine Biosynthesis	O-succinylhomoserine sulfhydrylase (EC 2.5.1.48)	<a href=&#39;?page=Annotation&feature=fig|6666666.640606.peg.886&#39; target=_blank>fig|6666666.640606.peg.886</a>, <a href=&#39;?page=Annotation&feature=fig|6666666.640606.peg.3654&#39; target=_blank>fig|6666666.640606.peg.3654</a>	yes	<a href=&#39;?page=Annotation&feature=fig|6666666.640605.peg.1766&#39; target=_blank>fig|6666666.640605.peg.1766</a>, <a href=&#39;?page=Annotation&feature=fig|6666666.640605.peg.3836&#39; target=_blank>fig|6666666.640605.peg.3836</a>	yes
A and B	Amino Acids and Derivatives	Lysine, threonine, methionine, and cysteine	Methionine Biosynthesis	S-adenosylmethionine synthetase (EC 2.5.1.6)	<a href=&#39;?page=Annotation&feature=fig|6666666.640606.peg.1058&#39; target=_blank>fig|6666666.640606.peg.1058</a>	yes	<a href=&#39;?page=Annotation&feature=fig|6666666.640605.peg.2171&#39; target=_blank>fig|6666666.640605.peg.2171</a>	yes
A and B	Amino Acids and Derivatives	Lysine, threonine, methionine, and cysteine	Methionine Biosynthesis	Serine acetyltransferase (EC 2.3.1.30)	<a href=&#39;?page=Annotation&feature=fig|6666666.640606.peg.1662&#39; target=_blank>fig|6666666.640606.peg.1662</a>	yes	<a href=&#39;?page=Annotation&feature=fig|6666666.640605.peg.3676&#39; target=_blank>fig|6666666.640605.peg.3676</a>	yes
A and B	Amino Acids and Derivatives	Lysine, threonine, methionine, and cysteine	Threonine and Homoserine Biosynthesis	Aspartate aminotransferase (EC 2.6.1.1)	<a href=&#39;?page=Annotation&feature=fig|6666666.640606.peg.557&#39; target=_blank>fig|6666666.640606.peg.557</a>, <a href=&#39;?page=Annotation&feature=fig|6666666.640606.peg.578&#39; target=_blank>fig|6666666.640606.peg.578</a>, <a href=&#39;?page=Annotation&feature=fig|6666666.640606.peg.3462&#39; target=_blank>fig|6666666.640606.peg.3462</a>	yes	<a href=&#39;?page=Annotation&feature=fig|6666666.640605.peg.327&#39; target=_blank>fig|6666666.640605.peg.327</a>, <a href=&#39;?page=Annotation&feature=fig|6666666.640605.peg.2705&#39; target=_blank>fig|6666666.640605.peg.2705</a>, <a href=&#39;?page=Annotation&feature=fig|6666666.640605.peg.3132&#39; target=_blank>fig|6666666.640605.peg.3132</a>	yes
A and B	Amino Acids and Derivatives	Lysine, threonine, methionine, and cysteine	Threonine and Homoserine Biosynthesis	Aspartate-semialdehyde dehydrogenase (EC 1.2.1.11)	<a href=&#39;?page=Annotation&feature=fig|6666666.640606.peg.1519&#39; target=_blank>fig|6666666.640606.peg.1519</a>	yes	<a href=&#39;?page=Annotation&feature=fig|6666666.640605.peg.3502&#39; target=_blank>fig|6666666.640605.peg.3502</a>	yes
A and B	Amino Acids and Derivatives	Lysine, threonine, methionine, and cysteine	Threonine and Homoserine Biosynthesis	Aspartokinase (EC 2.7.2.4)	<a href=&#39;?page=Annotation&feature=fig|6666666.640606.peg.1734&#39; target=_blank>fig|6666666.640606.peg.1734</a>, <a href=&#39;?page=Annotation&feature=fig|6666666.640606.peg.3497&#39; target=_blank>fig|6666666.640606.peg.3497</a>, <a href=&#39;?page=Annotation&feature=fig|6666666.640606.peg.3507&#39; target=_blank>fig|6666666.640606.peg.3507</a>	yes	<a href=&#39;?page=Annotation&feature=fig|6666666.640605.peg.2008&#39; target=_blank>fig|6666666.640605.peg.2008</a>, <a href=&#39;?page=Annotation&feature=fig|6666666.640605.peg.2021&#39; target=_blank>fig|6666666.640605.peg.2021</a>, <a href=&#39;?page=Annotation&feature=fig|6666666.640605.peg.2105&#39; target=_blank>fig|6666666.640605.peg.2105</a>	yes
A and B	Amino Acids and Derivatives	Lysine, threonine, methionine, and cysteine	Threonine and Homoserine Biosynthesis	Homoserine dehydrogenase (EC 1.1.1.3)	<a href=&#39;?page=Annotation&feature=fig|6666666.640606.peg.3507&#39; target=_blank>fig|6666666.640606.peg.3507</a>	yes	<a href=&#39;?page=Annotation&feature=fig|6666666.640605.peg.2021&#39; target=_blank>fig|6666666.640605.peg.2021</a>	yes
A and B	Amino Acids and Derivatives	Lysine, threonine, methionine, and cysteine	Threonine and Homoserine Biosynthesis	Homoserine kinase (EC 2.7.1.39)	<a href=&#39;?page=Annotation&feature=fig|6666666.640606.peg.3506&#39; target=_blank>fig|6666666.640606.peg.3506</a>	yes	<a href=&#39;?page=Annotation&feature=fig|6666666.640605.peg.2020&#39; target=_blank>fig|6666666.640605.peg.2020</a>	yes
A and B	Amino Acids and Derivatives	Lysine, threonine, methionine, and cysteine	Threonine and Homoserine Biosynthesis	Threonine synthase (EC 4.2.3.1)	<a href=&#39;?page=Annotation&feature=fig|6666666.640606.peg.3505&#39; target=_blank>fig|6666666.640606.peg.3505</a>	yes	<a href=&#39;?page=Annotation&feature=fig|6666666.640605.peg.2019&#39; target=_blank>fig|6666666.640605.peg.2019</a>	yes
A and B	Amino Acids and Derivatives	Lysine, threonine, methionine, and cysteine	Threonine degradation	L-allo-threonine aldolase (EC 2.1.2.1)	<a href=&#39;?page=Annotation&feature=fig|6666666.640606.peg.3406&#39; target=_blank>fig|6666666.640606.peg.3406</a>	yes	<a href=&#39;?page=Annotation&feature=fig|6666666.640605.peg.937&#39; target=_blank>fig|6666666.640605.peg.937</a>	yes
A and B	Amino Acids and Derivatives	Lysine, threonine, methionine, and cysteine	Threonine degradation	L-threonine 3-dehydrogenase (EC 1.1.1.103)	<a href=&#39;?page=Annotation&feature=fig|6666666.640606.peg.2371&#39; target=_blank>fig|6666666.640606.peg.2371</a>	yes	<a href=&#39;?page=Annotation&feature=fig|6666666.640605.peg.368&#39; target=_blank>fig|6666666.640605.peg.368</a>	yes
A and B	Amino Acids and Derivatives	Proline and 4-hydroxyproline	Proline, 4-hydroxyproline uptake and utilization	1-pyrroline-4-hydroxy-2-carboxylate deaminase (EC 3.5.4.22)	<a href=&#39;?page=Annotation&feature=fig|6666666.640606.peg.1405&#39; target=_blank>fig|6666666.640606.peg.1405</a>	yes	<a href=&#39;?page=Annotation&feature=fig|6666666.640605.peg.2093&#39; target=_blank>fig|6666666.640605.peg.2093</a>	yes
A and B	Amino Acids and Derivatives	Proline and 4-hydroxyproline	Proline, 4-hydroxyproline uptake and utilization	4-hydroxyproline epimerase (EC 5.1.1.8)	<a href=&#39;?page=Annotation&feature=fig|6666666.640606.peg.1403&#39; target=_blank>fig|6666666.640606.peg.1403</a>	yes	<a href=&#39;?page=Annotation&feature=fig|6666666.640605.peg.2095&#39; target=_blank>fig|6666666.640605.peg.2095</a>	yes
A and B	Amino Acids and Derivatives	Proline and 4-hydroxyproline	Proline, 4-hydroxyproline uptake and utilization	D-amino-acid oxidase (EC 1.4.3.3)	<a href=&#39;?page=Annotation&feature=fig|6666666.640606.peg.251&#39; target=_blank>fig|6666666.640606.peg.251</a>	yes	<a href=&#39;?page=Annotation&feature=fig|6666666.640605.peg.1382&#39; target=_blank>fig|6666666.640605.peg.1382</a>	yes
A and B	Amino Acids and Derivatives	Proline and 4-hydroxyproline	Proline, 4-hydroxyproline uptake and utilization	Delta-1-pyrroline-5-carboxylate dehydrogenase (EC 1.2.1.88)	<a href=&#39;?page=Annotation&feature=fig|6666666.640606.peg.3416&#39; target=_blank>fig|6666666.640606.peg.3416</a>	yes	<a href=&#39;?page=Annotation&feature=fig|6666666.640605.peg.950&#39; target=_blank>fig|6666666.640605.peg.950</a>	yes
A and B	Amino Acids and Derivatives	Proline and 4-hydroxyproline	Proline, 4-hydroxyproline uptake and utilization	Proline iminopeptidase (EC 3.4.11.5)	<a href=&#39;?page=Annotation&feature=fig|6666666.640606.peg.158&#39; target=_blank>fig|6666666.640606.peg.158</a>	yes	<a href=&#39;?page=Annotation&feature=fig|6666666.640605.peg.1086&#39; target=_blank>fig|6666666.640605.peg.1086</a>	yes
A and B	Amino Acids and Derivatives	Proline and 4-hydroxyproline	Proline Synthesis	Gamma-glutamyl phosphate reductase (EC 1.2.1.41)	<a href=&#39;?page=Annotation&feature=fig|6666666.640606.peg.2791&#39; target=_blank>fig|6666666.640606.peg.2791</a>	yes	<a href=&#39;?page=Annotation&feature=fig|6666666.640605.peg.1326&#39; target=_blank>fig|6666666.640605.peg.1326</a>	yes
A and B	Amino Acids and Derivatives	Proline and 4-hydroxyproline	Proline Synthesis	Glutamate 5-kinase (EC 2.7.2.11)	<a href=&#39;?page=Annotation&feature=fig|6666666.640606.peg.2790&#39; target=_blank>fig|6666666.640606.peg.2790</a>	yes	<a href=&#39;?page=Annotation&feature=fig|6666666.640605.peg.1327&#39; target=_blank>fig|6666666.640605.peg.1327</a>	yes
A and B	Amino Acids and Derivatives	Proline and 4-hydroxyproline	Proline Synthesis	NADP-specific glutamate dehydrogenase (EC 1.4.1.4)	<a href=&#39;?page=Annotation&feature=fig|6666666.640606.peg.943&#39; target=_blank>fig|6666666.640606.peg.943</a>	yes	<a href=&#39;?page=Annotation&feature=fig|6666666.640605.peg.2075&#39; target=_blank>fig|6666666.640605.peg.2075</a>	yes
A and B	Amino Acids and Derivatives	Proline and 4-hydroxyproline	Proline Synthesis	Pyrroline-5-carboxylate reductase (EC 1.5.1.2)	<a href=&#39;?page=Annotation&feature=fig|6666666.640606.peg.722&#39; target=_blank>fig|6666666.640606.peg.722</a>	yes	<a href=&#39;?page=Annotation&feature=fig|6666666.640605.peg.2646&#39; target=_blank>fig|6666666.640605.peg.2646</a>	yes
A and B	Amino Acids and Derivatives	Proline and 4-hydroxyproline	Proline Synthesis	RNA-binding C-terminal domain PUA	<a href=&#39;?page=Annotation&feature=fig|6666666.640606.peg.2790&#39; target=_blank>fig|6666666.640606.peg.2790</a>	yes	<a href=&#39;?page=Annotation&feature=fig|6666666.640605.peg.1327&#39; target=_blank>fig|6666666.640605.peg.1327</a>	yes
A and B	Amino Acids and Derivatives	no subcategory	Creatine and Creatinine Degradation	Creatinine amidohydrolase (EC 3.5.2.10)	<a href=&#39;?page=Annotation&feature=fig|6666666.640606.peg.2408&#39; target=_blank>fig|6666666.640606.peg.2408</a>, <a href=&#39;?page=Annotation&feature=fig|6666666.640606.peg.3649&#39; target=_blank>fig|6666666.640606.peg.3649</a>	yes	<a href=&#39;?page=Annotation&feature=fig|6666666.640605.peg.404&#39; target=_blank>fig|6666666.640605.peg.404</a>, <a href=&#39;?page=Annotation&feature=fig|6666666.640605.peg.3768&#39; target=_blank>fig|6666666.640605.peg.3768</a>	yes
B	Carbohydrates	Aminosugars	Chitin and N-acetylglucosamine utilization	Glucosamine-6-phosphate deaminase (EC 3.5.99.6)	<input type=&#39;button&#39; value=&#39;find&#39; onclick=&#39;window.open("?page=SearchGene&fr=Glucosamine-6-phosphate deaminase (EC 3.5.99.6)&organism=6666666.640606&subsystem=Chitin_and_N-acetylglucosamine_utilization&template_gene=fig|6666666.640605.peg.1808");&#39;>	no	<a href=&#39;?page=Annotation&feature=fig|6666666.640605.peg.1808&#39; target=_blank>fig|6666666.640605.peg.1808</a>	yes
B	Carbohydrates	Aminosugars	Chitin and N-acetylglucosamine utilization	N-acetyl glucosamine transporter, NagP	<input type=&#39;button&#39; value=&#39;find&#39; onclick=&#39;window.open("?page=SearchGene&fr=N-acetyl glucosamine transporter, NagP&organism=6666666.640606&subsystem=Chitin_and_N-acetylglucosamine_utilization&template_gene=fig|6666666.640605.peg.1809");&#39;>	no	<a href=&#39;?page=Annotation&feature=fig|6666666.640605.peg.1809&#39; target=_blank>fig|6666666.640605.peg.1809</a>	yes
B	Carbohydrates	Aminosugars	Chitin and N-acetylglucosamine utilization	N-acetylglucosamine-6-phosphate deacetylase (EC 3.5.1.25)	<input type=&#39;button&#39; value=&#39;find&#39; onclick=&#39;window.open("?page=SearchGene&fr=N-acetylglucosamine-6-phosphate deacetylase (EC 3.5.1.25)&organism=6666666.640606&subsystem=Chitin_and_N-acetylglucosamine_utilization&template_gene=fig|6666666.640605.peg.1810");&#39;>	no	<a href=&#39;?page=Annotation&feature=fig|6666666.640605.peg.1810&#39; target=_blank>fig|6666666.640605.peg.1810</a>	yes
B	Carbohydrates	CO2 fixation	CO2 uptake, carboxysome	RuBisCO operon transcriptional regulator CbbR	<input type=&#39;button&#39; value=&#39;find&#39; onclick=&#39;window.open("?page=SearchGene&fr=RuBisCO operon transcriptional regulator CbbR&organism=6666666.640606&subsystem=CO2_uptake,_carboxysome&template_gene=fig|6666666.640605.peg.994");&#39;>	no	<a href=&#39;?page=Annotation&feature=fig|6666666.640605.peg.994&#39; target=_blank>fig|6666666.640605.peg.994</a>	yes
A and B	Carbohydrates	Central carbohydrate metabolism	Dehydrogenase complexes	2-oxoglutarate dehydrogenase E1 component (EC 1.2.4.2)	<a href=&#39;?page=Annotation&feature=fig|6666666.640606.peg.928&#39; target=_blank>fig|6666666.640606.peg.928</a>	yes	<a href=&#39;?page=Annotation&feature=fig|6666666.640605.peg.2061&#39; target=_blank>fig|6666666.640605.peg.2061</a>	yes
A and B	Carbohydrates	Central carbohydrate metabolism	Dehydrogenase complexes	Branched-chain alpha-keto acid dehydrogenase, E1 component, alpha subunit (EC 1.2.4.4)	<a href=&#39;?page=Annotation&feature=fig|6666666.640606.peg.1704&#39; target=_blank>fig|6666666.640606.peg.1704</a>, <a href=&#39;?page=Annotation&feature=fig|6666666.640606.peg.2424&#39; target=_blank>fig|6666666.640606.peg.2424</a>	yes	<a href=&#39;?page=Annotation&feature=fig|6666666.640605.peg.7&#39; target=_blank>fig|6666666.640605.peg.7</a>, <a href=&#39;?page=Annotation&feature=fig|6666666.640605.peg.1925&#39; target=_blank>fig|6666666.640605.peg.1925</a>	yes
A and B	Carbohydrates	Central carbohydrate metabolism	Dehydrogenase complexes	Branched-chain alpha-keto acid dehydrogenase, E1 component, beta subunit (EC 1.2.4.4)	<a href=&#39;?page=Annotation&feature=fig|6666666.640606.peg.1704&#39; target=_blank>fig|6666666.640606.peg.1704</a>, <a href=&#39;?page=Annotation&feature=fig|6666666.640606.peg.2424&#39; target=_blank>fig|6666666.640606.peg.2424</a>	yes	<a href=&#39;?page=Annotation&feature=fig|6666666.640605.peg.7&#39; target=_blank>fig|6666666.640605.peg.7</a>, <a href=&#39;?page=Annotation&feature=fig|6666666.640605.peg.1925&#39; target=_blank>fig|6666666.640605.peg.1925</a>	yes
A and B	Carbohydrates	Central carbohydrate metabolism	Dehydrogenase complexes	Cytosol aminopeptidase PepA (EC 3.4.11.1)	<a href=&#39;?page=Annotation&feature=fig|6666666.640606.peg.601&#39; target=_blank>fig|6666666.640606.peg.601</a>	yes	<a href=&#39;?page=Annotation&feature=fig|6666666.640605.peg.1619&#39; target=_blank>fig|6666666.640605.peg.1619</a>	yes
A and B	Carbohydrates	Central carbohydrate metabolism	Dehydrogenase complexes	Dihydrolipoamide acetyltransferase component of pyruvate dehydrogenase complex (EC 2.3.1.12)	<a href=&#39;?page=Annotation&feature=fig|6666666.640606.peg.3293&#39; target=_blank>fig|6666666.640606.peg.3293</a>	yes	<a href=&#39;?page=Annotation&feature=fig|6666666.640605.peg.157&#39; target=_blank>fig|6666666.640605.peg.157</a>	yes
A and B	Carbohydrates	Central carbohydrate metabolism	Dehydrogenase complexes	Dihydrolipoamide acyltransferase component of branched-chain alpha-keto acid dehydrogenase complex (EC 2.3.1.168)	<a href=&#39;?page=Annotation&feature=fig|6666666.640606.peg.688&#39; target=_blank>fig|6666666.640606.peg.688</a>	yes	<a href=&#39;?page=Annotation&feature=fig|6666666.640605.peg.53&#39; target=_blank>fig|6666666.640605.peg.53</a>	yes
A and B	Carbohydrates	Central carbohydrate metabolism	Dehydrogenase complexes	Dihydrolipoamide dehydrogenase of 2-oxoglutarate dehydrogenase (EC 1.8.1.4)	<a href=&#39;?page=Annotation&feature=fig|6666666.640606.peg.925&#39; target=_blank>fig|6666666.640606.peg.925</a>	yes	<a href=&#39;?page=Annotation&feature=fig|6666666.640605.peg.2058&#39; target=_blank>fig|6666666.640605.peg.2058</a>	yes
A and B	Carbohydrates	Central carbohydrate metabolism	Dehydrogenase complexes	Dihydrolipoamide dehydrogenase of branched-chain alpha-keto acid dehydrogenase (EC 1.8.1.4)	<a href=&#39;?page=Annotation&feature=fig|6666666.640606.peg.3411&#39; target=_blank>fig|6666666.640606.peg.3411</a>	yes	<a href=&#39;?page=Annotation&feature=fig|6666666.640605.peg.944&#39; target=_blank>fig|6666666.640605.peg.944</a>	yes
A and B	Carbohydrates	Central carbohydrate metabolism	Dehydrogenase complexes	Dihydrolipoamide succinyltransferase component (E2) of 2-oxoglutarate dehydrogenase complex (EC 2.3.1.61)	<a href=&#39;?page=Annotation&feature=fig|6666666.640606.peg.927&#39; target=_blank>fig|6666666.640606.peg.927</a>	yes	<a href=&#39;?page=Annotation&feature=fig|6666666.640605.peg.2060&#39; target=_blank>fig|6666666.640605.peg.2060</a>	yes
A and B	Carbohydrates	Central carbohydrate metabolism	Dehydrogenase complexes	Pyruvate dehydrogenase E1 component alpha subunit (EC 1.2.4.1)	<a href=&#39;?page=Annotation&feature=fig|6666666.640606.peg.1737&#39; target=_blank>fig|6666666.640606.peg.1737</a>	yes	<a href=&#39;?page=Annotation&feature=fig|6666666.640605.peg.2108&#39; target=_blank>fig|6666666.640605.peg.2108</a>	yes
A and B	Carbohydrates	Central carbohydrate metabolism	Dehydrogenase complexes	Pyruvate dehydrogenase E1 component beta subunit (EC 1.2.4.1)	<a href=&#39;?page=Annotation&feature=fig|6666666.640606.peg.3635&#39; target=_blank>fig|6666666.640606.peg.3635</a>	yes	<a href=&#39;?page=Annotation&feature=fig|6666666.640605.peg.3784&#39; target=_blank>fig|6666666.640605.peg.3784</a>	yes
A and B	Carbohydrates	Central carbohydrate metabolism	Methylglyoxal Metabolism	Aldehyde dehydrogenase (EC 1.2.1.3)	<a href=&#39;?page=Annotation&feature=fig|6666666.640606.peg.2096&#39; target=_blank>fig|6666666.640606.peg.2096</a>, <a href=&#39;?page=Annotation&feature=fig|6666666.640606.peg.2096&#39; target=_blank>fig|6666666.640606.peg.2096</a>	yes	<a href=&#39;?page=Annotation&feature=fig|6666666.640605.peg.3328&#39; target=_blank>fig|6666666.640605.peg.3328</a>, <a href=&#39;?page=Annotation&feature=fig|6666666.640605.peg.3328&#39; target=_blank>fig|6666666.640605.peg.3328</a>	yes
A and B	Carbohydrates	Central carbohydrate metabolism	Methylglyoxal Metabolism	Aldehyde dehydrogenase B (EC 1.2.1.22)	<a href=&#39;?page=Annotation&feature=fig|6666666.640606.peg.3457&#39; target=_blank>fig|6666666.640606.peg.3457</a>	yes	<a href=&#39;?page=Annotation&feature=fig|6666666.640605.peg.3126&#39; target=_blank>fig|6666666.640605.peg.3126</a>	yes
A and B	Carbohydrates	Central carbohydrate metabolism	Methylglyoxal Metabolism	Methylglyoxal synthase (EC 4.2.3.3)	<a href=&#39;?page=Annotation&feature=fig|6666666.640606.peg.664&#39; target=_blank>fig|6666666.640606.peg.664</a>	yes	<a href=&#39;?page=Annotation&feature=fig|6666666.640605.peg.72&#39; target=_blank>fig|6666666.640605.peg.72</a>	yes
A and B	Carbohydrates	Central carbohydrate metabolism	Pentose phosphate pathway	6-phosphogluconate dehydrogenase, decarboxylating (EC 1.1.1.44)	<a href=&#39;?page=Annotation&feature=fig|6666666.640606.peg.2024&#39; target=_blank>fig|6666666.640606.peg.2024</a>	yes	<a href=&#39;?page=Annotation&feature=fig|6666666.640605.peg.3031&#39; target=_blank>fig|6666666.640605.peg.3031</a>	yes
A and B	Carbohydrates	Central carbohydrate metabolism	Pentose phosphate pathway	6-phosphogluconolactonase (EC 3.1.1.31), eukaryotic type	<a href=&#39;?page=Annotation&feature=fig|6666666.640606.peg.2022&#39; target=_blank>fig|6666666.640606.peg.2022</a>	yes	<a href=&#39;?page=Annotation&feature=fig|6666666.640605.peg.1896&#39; target=_blank>fig|6666666.640605.peg.1896</a>	yes
A and B	Carbohydrates	Central carbohydrate metabolism	Pentose phosphate pathway	Glucose-6-phosphate 1-dehydrogenase (EC 1.1.1.49)	<a href=&#39;?page=Annotation&feature=fig|6666666.640606.peg.2023&#39; target=_blank>fig|6666666.640606.peg.2023</a>	yes	<a href=&#39;?page=Annotation&feature=fig|6666666.640605.peg.1895&#39; target=_blank>fig|6666666.640605.peg.1895</a>	yes
A and B	Carbohydrates	Central carbohydrate metabolism	Pentose phosphate pathway	Ribose-phosphate pyrophosphokinase (EC 2.7.6.1)	<a href=&#39;?page=Annotation&feature=fig|6666666.640606.peg.3657&#39; target=_blank>fig|6666666.640606.peg.3657</a>	yes	<a href=&#39;?page=Annotation&feature=fig|6666666.640605.peg.3833&#39; target=_blank>fig|6666666.640605.peg.3833</a>	yes
A and B	Carbohydrates	Central carbohydrate metabolism	Pentose phosphate pathway	Ribulose-phosphate 3-epimerase (EC 5.1.3.1)	<a href=&#39;?page=Annotation&feature=fig|6666666.640606.peg.2293&#39; target=_blank>fig|6666666.640606.peg.2293</a>	yes	<a href=&#39;?page=Annotation&feature=fig|6666666.640605.peg.1654&#39; target=_blank>fig|6666666.640605.peg.1654</a>	yes
A and B	Carbohydrates	Central carbohydrate metabolism	Pentose phosphate pathway	Transaldolase (EC 2.2.1.2)	<a href=&#39;?page=Annotation&feature=fig|6666666.640606.peg.3690&#39; target=_blank>fig|6666666.640606.peg.3690</a>	yes	<a href=&#39;?page=Annotation&feature=fig|6666666.640605.peg.3804&#39; target=_blank>fig|6666666.640605.peg.3804</a>	yes
A and B	Carbohydrates	Central carbohydrate metabolism	Pentose phosphate pathway	Transketolase, C-terminal section (EC 2.2.1.1)	<a href=&#39;?page=Annotation&feature=fig|6666666.640606.peg.2443&#39; target=_blank>fig|6666666.640606.peg.2443</a>	yes	<a href=&#39;?page=Annotation&feature=fig|6666666.640605.peg.2790&#39; target=_blank>fig|6666666.640605.peg.2790</a>	yes
A and B	Carbohydrates	Central carbohydrate metabolism	Pentose phosphate pathway	Transketolase, N-terminal section (EC 2.2.1.1)	<a href=&#39;?page=Annotation&feature=fig|6666666.640606.peg.2442&#39; target=_blank>fig|6666666.640606.peg.2442</a>	yes	<a href=&#39;?page=Annotation&feature=fig|6666666.640605.peg.2789&#39; target=_blank>fig|6666666.640605.peg.2789</a>	yes
A and B	Carbohydrates	Central carbohydrate metabolism	Pyruvate Alanine Serine Interconversions	Alanine dehydrogenase (EC 1.4.1.1)	<a href=&#39;?page=Annotation&feature=fig|6666666.640606.peg.2426&#39; target=_blank>fig|6666666.640606.peg.2426</a>, <a href=&#39;?page=Annotation&feature=fig|6666666.640606.peg.2710&#39; target=_blank>fig|6666666.640606.peg.2710</a>	yes	<a href=&#39;?page=Annotation&feature=fig|6666666.640605.peg.9&#39; target=_blank>fig|6666666.640605.peg.9</a>, <a href=&#39;?page=Annotation&feature=fig|6666666.640605.peg.3851&#39; target=_blank>fig|6666666.640605.peg.3851</a>	yes
A and B	Carbohydrates	Central carbohydrate metabolism	Pyruvate Alanine Serine Interconversions	Alanine racemase (EC 5.1.1.1)	<a href=&#39;?page=Annotation&feature=fig|6666666.640606.peg.1211&#39; target=_blank>fig|6666666.640606.peg.1211</a>, <a href=&#39;?page=Annotation&feature=fig|6666666.640606.peg.1972&#39; target=_blank>fig|6666666.640606.peg.1972</a>	yes	<a href=&#39;?page=Annotation&feature=fig|6666666.640605.peg.764&#39; target=_blank>fig|6666666.640605.peg.764</a>, <a href=&#39;?page=Annotation&feature=fig|6666666.640605.peg.784&#39; target=_blank>fig|6666666.640605.peg.784</a>	yes
A and B	Carbohydrates	Central carbohydrate metabolism	Pyruvate Alanine Serine Interconversions	Branched-chain amino acid aminotransferase (EC 2.6.1.42)	<a href=&#39;?page=Annotation&feature=fig|6666666.640606.peg.588&#39; target=_blank>fig|6666666.640606.peg.588</a>	yes	<a href=&#39;?page=Annotation&feature=fig|6666666.640605.peg.2591&#39; target=_blank>fig|6666666.640605.peg.2591</a>	yes
A and B	Carbohydrates	Central carbohydrate metabolism	Pyruvate Alanine Serine Interconversions	L-serine dehydratase, alpha subunit (EC 4.3.1.17)	<a href=&#39;?page=Annotation&feature=fig|6666666.640606.peg.2982&#39; target=_blank>fig|6666666.640606.peg.2982</a>	yes	<a href=&#39;?page=Annotation&feature=fig|6666666.640605.peg.1987&#39; target=_blank>fig|6666666.640605.peg.1987</a>	yes
A and B	Carbohydrates	Central carbohydrate metabolism	Pyruvate Alanine Serine Interconversions	L-serine dehydratase, beta subunit (EC 4.3.1.17)	<a href=&#39;?page=Annotation&feature=fig|6666666.640606.peg.2315&#39; target=_blank>fig|6666666.640606.peg.2315</a>	yes	<a href=&#39;?page=Annotation&feature=fig|6666666.640605.peg.2953&#39; target=_blank>fig|6666666.640605.peg.2953</a>	yes
A and B	Carbohydrates	Central carbohydrate metabolism	Pyruvate metabolism I: anaplerotic reactions, PEP	NADP-dependent malic enzyme (EC 1.1.1.40)	<a href=&#39;?page=Annotation&feature=fig|6666666.640606.peg.422&#39; target=_blank>fig|6666666.640606.peg.422</a>	yes	<a href=&#39;?page=Annotation&feature=fig|6666666.640605.peg.1463&#39; target=_blank>fig|6666666.640605.peg.1463</a>	yes
A and B	Carbohydrates	Central carbohydrate metabolism	Pyruvate metabolism I: anaplerotic reactions, PEP	Phosphoenolpyruvate carboxykinase [ATP] (EC 4.1.1.49)	<a href=&#39;?page=Annotation&feature=fig|6666666.640606.peg.2228&#39; target=_blank>fig|6666666.640606.peg.2228</a>	yes	<a href=&#39;?page=Annotation&feature=fig|6666666.640605.peg.1752&#39; target=_blank>fig|6666666.640605.peg.1752</a>	yes
A and B	Carbohydrates	Central carbohydrate metabolism	Pyruvate metabolism I: anaplerotic reactions, PEP	Phosphoenolpyruvate carboxylase (EC 4.1.1.31)	<a href=&#39;?page=Annotation&feature=fig|6666666.640606.peg.2629&#39; target=_blank>fig|6666666.640606.peg.2629</a>	yes	<a href=&#39;?page=Annotation&feature=fig|6666666.640605.peg.2286&#39; target=_blank>fig|6666666.640605.peg.2286</a>	yes
A and B	Carbohydrates	Central carbohydrate metabolism	Pyruvate metabolism I: anaplerotic reactions, PEP	Pyruvate kinase (EC 2.7.1.40)	<a href=&#39;?page=Annotation&feature=fig|6666666.640606.peg.488&#39; target=_blank>fig|6666666.640606.peg.488</a>	yes	<a href=&#39;?page=Annotation&feature=fig|6666666.640605.peg.123&#39; target=_blank>fig|6666666.640605.peg.123</a>	yes
A and B	Carbohydrates	Central carbohydrate metabolism	Pyruvate metabolism II: acetyl-CoA, acetogenesis from pyruvate	Acetate permease ActP (cation/acetate symporter)	<a href=&#39;?page=Annotation&feature=fig|6666666.640606.peg.2007&#39; target=_blank>fig|6666666.640606.peg.2007</a>	yes	<a href=&#39;?page=Annotation&feature=fig|6666666.640605.peg.556&#39; target=_blank>fig|6666666.640605.peg.556</a>	yes
A and B	Carbohydrates	Central carbohydrate metabolism	Pyruvate metabolism II: acetyl-CoA, acetogenesis from pyruvate	Aldehyde dehydrogenase (EC 1.2.1.3)	<a href=&#39;?page=Annotation&feature=fig|6666666.640606.peg.2096&#39; target=_blank>fig|6666666.640606.peg.2096</a>	yes	<a href=&#39;?page=Annotation&feature=fig|6666666.640605.peg.3328&#39; target=_blank>fig|6666666.640605.peg.3328</a>	yes
A and B	Carbohydrates	Central carbohydrate metabolism	Pyruvate metabolism II: acetyl-CoA, acetogenesis from pyruvate	Dihydrolipoamide acetyltransferase component of pyruvate dehydrogenase complex (EC 2.3.1.12)	<a href=&#39;?page=Annotation&feature=fig|6666666.640606.peg.3293&#39; target=_blank>fig|6666666.640606.peg.3293</a>	yes	<a href=&#39;?page=Annotation&feature=fig|6666666.640605.peg.157&#39; target=_blank>fig|6666666.640605.peg.157</a>	yes
A and B	Carbohydrates	Central carbohydrate metabolism	Pyruvate metabolism II: acetyl-CoA, acetogenesis from pyruvate	NAD-dependent protein deacetylase of SIR2 family	<a href=&#39;?page=Annotation&feature=fig|6666666.640606.peg.3280&#39; target=_blank>fig|6666666.640606.peg.3280</a>	yes	<a href=&#39;?page=Annotation&feature=fig|6666666.640605.peg.64&#39; target=_blank>fig|6666666.640605.peg.64</a>	yes
A and B	Carbohydrates	Central carbohydrate metabolism	Pyruvate metabolism II: acetyl-CoA, acetogenesis from pyruvate	Pyruvate dehydrogenase E1 component alpha subunit (EC 1.2.4.1)	<a href=&#39;?page=Annotation&feature=fig|6666666.640606.peg.1737&#39; target=_blank>fig|6666666.640606.peg.1737</a>	yes	<a href=&#39;?page=Annotation&feature=fig|6666666.640605.peg.2108&#39; target=_blank>fig|6666666.640605.peg.2108</a>	yes
A and B	Carbohydrates	Central carbohydrate metabolism	Pyruvate metabolism II: acetyl-CoA, acetogenesis from pyruvate	Pyruvate dehydrogenase E1 component beta subunit (EC 1.2.4.1)	<a href=&#39;?page=Annotation&feature=fig|6666666.640606.peg.3635&#39; target=_blank>fig|6666666.640606.peg.3635</a>	yes	<a href=&#39;?page=Annotation&feature=fig|6666666.640605.peg.3784&#39; target=_blank>fig|6666666.640605.peg.3784</a>	yes
B	Carbohydrates	Central carbohydrate metabolism	Pyruvate metabolism I: anaplerotic reactions, PEP	Phosphoenolpyruvate synthase (EC 2.7.9.2)	<input type=&#39;button&#39; value=&#39;find&#39; onclick=&#39;window.open("?page=SearchGene&fr=Phosphoenolpyruvate synthase (EC 2.7.9.2)&organism=6666666.640606&subsystem=Pyruvate_metabolism_I:_anaplerotic_reactions,_PEP&template_gene=fig|6666666.640605.peg.2217");&#39;>	no	<a href=&#39;?page=Annotation&feature=fig|6666666.640605.peg.2217&#39; target=_blank>fig|6666666.640605.peg.2217</a>	yes
A and B	Carbohydrates	Di- and oligosaccharides	Lactose and Galactose Uptake and Utilization	Aldose 1-epimerase (EC 5.1.3.3)	<a href=&#39;?page=Annotation&feature=fig|6666666.640606.peg.2761&#39; target=_blank>fig|6666666.640606.peg.2761</a>	yes	<a href=&#39;?page=Annotation&feature=fig|6666666.640605.peg.3028&#39; target=_blank>fig|6666666.640605.peg.3028</a>	yes
A and B	Carbohydrates	Di- and oligosaccharides	Lactose and Galactose Uptake and Utilization	Galactokinase (EC 2.7.1.6)	<a href=&#39;?page=Annotation&feature=fig|6666666.640606.peg.727&#39; target=_blank>fig|6666666.640606.peg.727</a>	yes	<a href=&#39;?page=Annotation&feature=fig|6666666.640605.peg.1116&#39; target=_blank>fig|6666666.640605.peg.1116</a>	yes
A and B	Carbohydrates	Di- and oligosaccharides	Lactose and Galactose Uptake and Utilization	UDP-glucose 4-epimerase (EC 5.1.3.2)	<a href=&#39;?page=Annotation&feature=fig|6666666.640606.peg.259&#39; target=_blank>fig|6666666.640606.peg.259</a>, <a href=&#39;?page=Annotation&feature=fig|6666666.640606.peg.2555&#39; target=_blank>fig|6666666.640606.peg.2555</a>, <a href=&#39;?page=Annotation&feature=fig|6666666.640606.peg.3265&#39; target=_blank>fig|6666666.640606.peg.3265</a>	yes	<a href=&#39;?page=Annotation&feature=fig|6666666.640605.peg.1389&#39; target=_blank>fig|6666666.640605.peg.1389</a>, <a href=&#39;?page=Annotation&feature=fig|6666666.640605.peg.2359&#39; target=_blank>fig|6666666.640605.peg.2359</a>, <a href=&#39;?page=Annotation&feature=fig|6666666.640605.peg.2537&#39; target=_blank>fig|6666666.640605.peg.2537</a>, <a href=&#39;?page=Annotation&feature=fig|666…	yes
A and B	Carbohydrates	Di- and oligosaccharides	Trehalose Biosynthesis	1,4-alpha-glucan (glycogen) branching enzyme, GH-13-type (EC 2.4.1.18)	<a href=&#39;?page=Annotation&feature=fig|6666666.640606.peg.3360&#39; target=_blank>fig|6666666.640606.peg.3360</a>	yes	<a href=&#39;?page=Annotation&feature=fig|6666666.640605.peg.176&#39; target=_blank>fig|6666666.640605.peg.176</a>	yes
A and B	Carbohydrates	Di- and oligosaccharides	Trehalose Biosynthesis	Alpha,alpha-trehalose-phosphate synthase [UDP-forming] (EC 2.4.1.15)	<a href=&#39;?page=Annotation&feature=fig|6666666.640606.peg.1057&#39; target=_blank>fig|6666666.640606.peg.1057</a>	yes	<a href=&#39;?page=Annotation&feature=fig|6666666.640605.peg.2172&#39; target=_blank>fig|6666666.640605.peg.2172</a>	yes
A and B	Carbohydrates	Di- and oligosaccharides	Trehalose Biosynthesis	Alpha-amylase (EC 3.2.1.1)	<a href=&#39;?page=Annotation&feature=fig|6666666.640606.peg.3488&#39; target=_blank>fig|6666666.640606.peg.3488</a>	yes	<a href=&#39;?page=Annotation&feature=fig|6666666.640605.peg.76&#39; target=_blank>fig|6666666.640605.peg.76</a>, <a href=&#39;?page=Annotation&feature=fig|6666666.640605.peg.1998&#39; target=_blank>fig|6666666.640605.peg.1998</a>	yes
A and B	Carbohydrates	Di- and oligosaccharides	Trehalose Biosynthesis	Glucoamylase (EC 3.2.1.3)	<a href=&#39;?page=Annotation&feature=fig|6666666.640606.peg.1049&#39; target=_blank>fig|6666666.640606.peg.1049</a>	yes	<a href=&#39;?page=Annotation&feature=fig|6666666.640605.peg.2173&#39; target=_blank>fig|6666666.640605.peg.2173</a>	yes
A and B	Carbohydrates	Di- and oligosaccharides	Trehalose Biosynthesis	Trehalose-6-phosphate phosphatase (EC 3.1.3.12)	<a href=&#39;?page=Annotation&feature=fig|6666666.640606.peg.1057&#39; target=_blank>fig|6666666.640606.peg.1057</a>	yes	<a href=&#39;?page=Annotation&feature=fig|6666666.640605.peg.2172&#39; target=_blank>fig|6666666.640605.peg.2172</a>	yes
A and B	Carbohydrates	Fermentation	Acetolactate synthase subunits	Acetolactate synthase large subunit (EC 2.2.1.6)	<a href=&#39;?page=Annotation&feature=fig|6666666.640606.peg.2938&#39; target=_blank>fig|6666666.640606.peg.2938</a>	yes	<a href=&#39;?page=Annotation&feature=fig|6666666.640605.peg.1939&#39; target=_blank>fig|6666666.640605.peg.1939</a>	yes
A and B	Carbohydrates	Fermentation	Acetolactate synthase subunits	Acetolactate synthase small subunit (EC 2.2.1.6)	<a href=&#39;?page=Annotation&feature=fig|6666666.640606.peg.2937&#39; target=_blank>fig|6666666.640606.peg.2937</a>	yes	<a href=&#39;?page=Annotation&feature=fig|6666666.640605.peg.1938&#39; target=_blank>fig|6666666.640605.peg.1938</a>	yes
A and B	Carbohydrates	Fermentation	Acetyl-CoA fermentation to Butyrate	3-hydroxyacyl-CoA dehydrogenase (EC 1.1.1.35)	<a href=&#39;?page=Annotation&feature=fig|6666666.640606.peg.2270&#39; target=_blank>fig|6666666.640606.peg.2270</a>	yes	<a href=&#39;?page=Annotation&feature=fig|6666666.640605.peg.1676&#39; target=_blank>fig|6666666.640605.peg.1676</a>	yes
A and B	Carbohydrates	Fermentation	Acetyl-CoA fermentation to Butyrate	3-hydroxybutyryl-CoA dehydrogenase (EC 1.1.1.157)	<a href=&#39;?page=Annotation&feature=fig|6666666.640606.peg.2242&#39; target=_blank>fig|6666666.640606.peg.2242</a>, <a href=&#39;?page=Annotation&feature=fig|6666666.640606.peg.2270&#39; target=_blank>fig|6666666.640606.peg.2270</a>	yes	<a href=&#39;?page=Annotation&feature=fig|6666666.640605.peg.1676&#39; target=_blank>fig|6666666.640605.peg.1676</a>, <a href=&#39;?page=Annotation&feature=fig|6666666.640605.peg.1740&#39; target=_blank>fig|6666666.640605.peg.1740</a>	yes
A and B	Carbohydrates	Fermentation	Acetyl-CoA fermentation to Butyrate	Acetyl-CoA acetyltransferase (EC 2.3.1.9)	<a href=&#39;?page=Annotation&feature=fig|6666666.640606.peg.629&#39; target=_blank>fig|6666666.640606.peg.629</a>	yes	<a href=&#39;?page=Annotation&feature=fig|6666666.640605.peg.2624&#39; target=_blank>fig|6666666.640605.peg.2624</a>	yes
A and B	Carbohydrates	Fermentation	Acetyl-CoA fermentation to Butyrate	Butyryl-CoA dehydrogenase (EC 1.3.8.1)	<a href=&#39;?page=Annotation&feature=fig|6666666.640606.peg.1580&#39; target=_blank>fig|6666666.640606.peg.1580</a>, <a href=&#39;?page=Annotation&feature=fig|6666666.640606.peg.1769&#39; target=_blank>fig|6666666.640606.peg.1769</a>	yes	<a href=&#39;?page=Annotation&feature=fig|6666666.640605.peg.602&#39; target=_blank>fig|6666666.640605.peg.602</a>, <a href=&#39;?page=Annotation&feature=fig|6666666.640605.peg.3473&#39; target=_blank>fig|6666666.640605.peg.3473</a>	yes
A and B	Carbohydrates	Fermentation	Acetyl-CoA fermentation to Butyrate	Electron transfer flavoprotein, alpha subunit	<a href=&#39;?page=Annotation&feature=fig|6666666.640606.peg.763&#39; target=_blank>fig|6666666.640606.peg.763</a>	yes	<a href=&#39;?page=Annotation&feature=fig|6666666.640605.peg.2679&#39; target=_blank>fig|6666666.640605.peg.2679</a>	yes
A and B	Carbohydrates	Fermentation	Acetyl-CoA fermentation to Butyrate	Electron transfer flavoprotein, beta subunit	<a href=&#39;?page=Annotation&feature=fig|6666666.640606.peg.762&#39; target=_blank>fig|6666666.640606.peg.762</a>	yes	<a href=&#39;?page=Annotation&feature=fig|6666666.640605.peg.2680&#39; target=_blank>fig|6666666.640605.peg.2680</a>	yes
A and B	Carbohydrates	Fermentation	Acetyl-CoA fermentation to Butyrate	Enoyl-CoA hydratase (EC 4.2.1.17)	<a href=&#39;?page=Annotation&feature=fig|6666666.640606.peg.431&#39; target=_blank>fig|6666666.640606.peg.431</a>, <a href=&#39;?page=Annotation&feature=fig|6666666.640606.peg.2902&#39; target=_blank>fig|6666666.640606.peg.2902</a>	yes	<a href=&#39;?page=Annotation&feature=fig|6666666.640605.peg.981&#39; target=_blank>fig|6666666.640605.peg.981</a>, <a href=&#39;?page=Annotation&feature=fig|6666666.640605.peg.1472&#39; target=_blank>fig|6666666.640605.peg.1472</a>	yes
A and B	Carbohydrates	Fermentation	Butanol Biosynthesis	3-hydroxybutyryl-CoA dehydrogenase (EC 1.1.1.157)	<a href=&#39;?page=Annotation&feature=fig|6666666.640606.peg.2242&#39; target=_blank>fig|6666666.640606.peg.2242</a>, <a href=&#39;?page=Annotation&feature=fig|6666666.640606.peg.2270&#39; target=_blank>fig|6666666.640606.peg.2270</a>	yes	<a href=&#39;?page=Annotation&feature=fig|6666666.640605.peg.1676&#39; target=_blank>fig|6666666.640605.peg.1676</a>, <a href=&#39;?page=Annotation&feature=fig|6666666.640605.peg.1740&#39; target=_blank>fig|6666666.640605.peg.1740</a>	yes
A and B	Carbohydrates	Fermentation	Butanol Biosynthesis	Acetyl-CoA acetyltransferase (EC 2.3.1.9)	<a href=&#39;?page=Annotation&feature=fig|6666666.640606.peg.629&#39; target=_blank>fig|6666666.640606.peg.629</a>	yes	<a href=&#39;?page=Annotation&feature=fig|6666666.640605.peg.2624&#39; target=_blank>fig|6666666.640605.peg.2624</a>	yes
A and B	Carbohydrates	Fermentation	Butanol Biosynthesis	Alcohol dehydrogenase (EC 1.1.1.1)	<a href=&#39;?page=Annotation&feature=fig|6666666.640606.peg.759&#39; target=_blank>fig|6666666.640606.peg.759</a>, <a href=&#39;?page=Annotation&feature=fig|6666666.640606.peg.2021&#39; target=_blank>fig|6666666.640606.peg.2021</a>, <a href=&#39;?page=Annotation&feature=fig|6666666.640606.peg.2464&#39; target=_blank>fig|6666666.640606.peg.2464</a>	yes	<a href=&#39;?page=Annotation&feature=fig|6666666.640605.peg.1402&#39; target=_blank>fig|6666666.640605.peg.1402</a>, <a href=&#39;?page=Annotation&feature=fig|6666666.640605.peg.2683&#39; target=_blank>fig|6666666.640605.peg.2683</a>	yes
A and B	Carbohydrates	Fermentation	Butanol Biosynthesis	Butyryl-CoA dehydrogenase (EC 1.3.8.1)	<a href=&#39;?page=Annotation&feature=fig|6666666.640606.peg.1580&#39; target=_blank>fig|6666666.640606.peg.1580</a>, <a href=&#39;?page=Annotation&feature=fig|6666666.640606.peg.1769&#39; target=_blank>fig|6666666.640606.peg.1769</a>	yes	<a href=&#39;?page=Annotation&feature=fig|6666666.640605.peg.602&#39; target=_blank>fig|6666666.640605.peg.602</a>, <a href=&#39;?page=Annotation&feature=fig|6666666.640605.peg.3473&#39; target=_blank>fig|6666666.640605.peg.3473</a>	yes
A and B	Carbohydrates	Fermentation	Butanol Biosynthesis	Enoyl-CoA hydratase (EC 4.2.1.17)	<a href=&#39;?page=Annotation&feature=fig|6666666.640606.peg.431&#39; target=_blank>fig|6666666.640606.peg.431</a>, <a href=&#39;?page=Annotation&feature=fig|6666666.640606.peg.2902&#39; target=_blank>fig|6666666.640606.peg.2902</a>	yes	<a href=&#39;?page=Annotation&feature=fig|6666666.640605.peg.981&#39; target=_blank>fig|6666666.640605.peg.981</a>, <a href=&#39;?page=Annotation&feature=fig|6666666.640605.peg.1472&#39; target=_blank>fig|6666666.640605.peg.1472</a>	yes
A and B	Carbohydrates	Fermentation	Fermentations: Lactate	D-lactate dehydrogenase (EC 1.1.1.28)	<a href=&#39;?page=Annotation&feature=fig|6666666.640606.peg.215&#39; target=_blank>fig|6666666.640606.peg.215</a>	yes	<a href=&#39;?page=Annotation&feature=fig|6666666.640605.peg.233&#39; target=_blank>fig|6666666.640605.peg.233</a>	yes
B	Carbohydrates	Fermentation	Fermentations: Lactate	Acetate kinase (EC 2.7.2.1)	<input type=&#39;button&#39; value=&#39;find&#39; onclick=&#39;window.open("?page=SearchGene&fr=Acetate kinase (EC 2.7.2.1)&organism=6666666.640606&subsystem=Fermentations:_Lactate&template_gene=fig|6666666.640605.peg.429");&#39;>	no	<a href=&#39;?page=Annotation&feature=fig|6666666.640605.peg.429&#39; target=_blank>fig|6666666.640605.peg.429</a>	yes
B	Carbohydrates	Fermentation	Fermentations: Lactate	Phosphate acetyltransferase (EC 2.3.1.8)	<input type=&#39;button&#39; value=&#39;find&#39; onclick=&#39;window.open("?page=SearchGene&fr=Phosphate acetyltransferase (EC 2.3.1.8)&organism=6666666.640606&subsystem=Fermentations:_Lactate&template_gene=fig|6666666.640605.peg.431");&#39;>	no	<a href=&#39;?page=Annotation&feature=fig|6666666.640605.peg.431&#39; target=_blank>fig|6666666.640605.peg.431</a>	yes
A and B	Carbohydrates	Monosaccharides	D-Galacturonate and D-Glucuronate Utilization	2-dehydro-3-deoxyphosphogluconate aldolase (EC 4.1.2.14)	<a href=&#39;?page=Annotation&feature=fig|6666666.640606.peg.2106&#39; target=_blank>fig|6666666.640606.peg.2106</a>	yes	<a href=&#39;?page=Annotation&feature=fig|6666666.640605.peg.874&#39; target=_blank>fig|6666666.640605.peg.874</a>, <a href=&#39;?page=Annotation&feature=fig|6666666.640605.peg.3005&#39; target=_blank>fig|6666666.640605.peg.3005</a>	yes
A and B	Carbohydrates	Monosaccharides	D-Galacturonate and D-Glucuronate Utilization	Alpha-glucosidase (EC 3.2.1.20)	<a href=&#39;?page=Annotation&feature=fig|6666666.640606.peg.3573&#39; target=_blank>fig|6666666.640606.peg.3573</a>	yes	<a href=&#39;?page=Annotation&feature=fig|6666666.640605.peg.80&#39; target=_blank>fig|6666666.640605.peg.80</a>	yes
A and B	Carbohydrates	Monosaccharides	D-Galacturonate and D-Glucuronate Utilization	Altronate oxidoreductase (EC 1.1.1.58)	<a href=&#39;?page=Annotation&feature=fig|6666666.640606.peg.2848&#39; target=_blank>fig|6666666.640606.peg.2848</a>	yes	<a href=&#39;?page=Annotation&feature=fig|6666666.640605.peg.3010&#39; target=_blank>fig|6666666.640605.peg.3010</a>	yes
A and B	Carbohydrates	Monosaccharides	D-Galacturonate and D-Glucuronate Utilization	D-mannonate oxidoreductase (EC 1.1.1.57)	<a href=&#39;?page=Annotation&feature=fig|6666666.640606.peg.542&#39; target=_blank>fig|6666666.640606.peg.542</a>	yes	<a href=&#39;?page=Annotation&feature=fig|6666666.640605.peg.3251&#39; target=_blank>fig|6666666.640605.peg.3251</a>	yes
A and B	Carbohydrates	Monosaccharides	D-Galacturonate and D-Glucuronate Utilization	Mannonate dehydratase (EC 4.2.1.8)	<a href=&#39;?page=Annotation&feature=fig|6666666.640606.peg.541&#39; target=_blank>fig|6666666.640606.peg.541</a>	yes	<a href=&#39;?page=Annotation&feature=fig|6666666.640605.peg.3252&#39; target=_blank>fig|6666666.640605.peg.3252</a>	yes
A and B	Carbohydrates	Monosaccharides	D-Galacturonate and D-Glucuronate Utilization	Uronate isomerase (EC 5.3.1.12)	<a href=&#39;?page=Annotation&feature=fig|6666666.640606.peg.543&#39; target=_blank>fig|6666666.640606.peg.543</a>	yes	<a href=&#39;?page=Annotation&feature=fig|6666666.640605.peg.3250&#39; target=_blank>fig|6666666.640605.peg.3250</a>	yes
A and B	Carbohydrates	Monosaccharides	D-galactarate, D-glucarate and D-glycerate catabolism	D-glycerate transporter (predicted)	<a href=&#39;?page=Annotation&feature=fig|6666666.640606.peg.3123&#39; target=_blank>fig|6666666.640606.peg.3123</a>	yes	<a href=&#39;?page=Annotation&feature=fig|6666666.640605.peg.3837&#39; target=_blank>fig|6666666.640605.peg.3837</a>	yes
A and B	Carbohydrates	Monosaccharides	D-galactarate, D-glucarate and D-glycerate catabolism	Glycerate kinase (EC 2.7.1.31)	<a href=&#39;?page=Annotation&feature=fig|6666666.640606.peg.2209&#39; target=_blank>fig|6666666.640606.peg.2209</a>	yes	<a href=&#39;?page=Annotation&feature=fig|6666666.640605.peg.1698&#39; target=_blank>fig|6666666.640605.peg.1698</a>	yes
A and B	Carbohydrates	Monosaccharides	D-galactarate, D-glucarate and D-glycerate catabolism - gjo	D-glycerate transporter (predicted)	<a href=&#39;?page=Annotation&feature=fig|6666666.640606.peg.3123&#39; target=_blank>fig|6666666.640606.peg.3123</a>	yes	<a href=&#39;?page=Annotation&feature=fig|6666666.640605.peg.3837&#39; target=_blank>fig|6666666.640605.peg.3837</a>	yes
A and B	Carbohydrates	Monosaccharides	D-galactarate, D-glucarate and D-glycerate catabolism - gjo	Glycerate kinase (EC 2.7.1.31)	<a href=&#39;?page=Annotation&feature=fig|6666666.640606.peg.2209&#39; target=_blank>fig|6666666.640606.peg.2209</a>	yes	<a href=&#39;?page=Annotation&feature=fig|6666666.640605.peg.1698&#39; target=_blank>fig|6666666.640605.peg.1698</a>	yes
A and B	Carbohydrates	Monosaccharides	D-gluconate and ketogluconates metabolism	6-phosphogluconate dehydrogenase, decarboxylating (EC 1.1.1.44)	<a href=&#39;?page=Annotation&feature=fig|6666666.640606.peg.2024&#39; target=_blank>fig|6666666.640606.peg.2024</a>	yes	<a href=&#39;?page=Annotation&feature=fig|6666666.640605.peg.3031&#39; target=_blank>fig|6666666.640605.peg.3031</a>	yes
A and B	Carbohydrates	Monosaccharides	D-gluconate and ketogluconates metabolism	Gluconate permease, Bsu4004 homolog	<a href=&#39;?page=Annotation&feature=fig|6666666.640606.peg.3717&#39; target=_blank>fig|6666666.640606.peg.3717</a>	yes	<a href=&#39;?page=Annotation&feature=fig|6666666.640605.peg.3343&#39; target=_blank>fig|6666666.640605.peg.3343</a>	yes
A and B	Carbohydrates	Monosaccharides	D-gluconate and ketogluconates metabolism	Glucose dehydrogenase, PQQ-dependent (EC 1.1.5.2)	<a href=&#39;?page=Annotation&feature=fig|6666666.640606.peg.1583&#39; target=_blank>fig|6666666.640606.peg.1583</a>	yes	<a href=&#39;?page=Annotation&feature=fig|6666666.640605.peg.2088&#39; target=_blank>fig|6666666.640605.peg.2088</a>	yes
A and B	Carbohydrates	Monosaccharides	D-ribose utilization	Ribokinase (EC 2.7.1.15)	<a href=&#39;?page=Annotation&feature=fig|6666666.640606.peg.2913&#39; target=_blank>fig|6666666.640606.peg.2913</a>	yes	<a href=&#39;?page=Annotation&feature=fig|6666666.640605.peg.1920&#39; target=_blank>fig|6666666.640605.peg.1920</a>	yes
A and B	Carbohydrates	Monosaccharides	Deoxyribose and Deoxynucleoside Catabolism	Deoxyribose-phosphate aldolase (EC 4.1.2.4)	<a href=&#39;?page=Annotation&feature=fig|6666666.640606.peg.1271&#39; target=_blank>fig|6666666.640606.peg.1271</a>	yes	<a href=&#39;?page=Annotation&feature=fig|6666666.640605.peg.3293&#39; target=_blank>fig|6666666.640605.peg.3293</a>	yes
A and B	Carbohydrates	Monosaccharides	Deoxyribose and Deoxynucleoside Catabolism	Purine nucleoside phosphorylase (EC 2.4.2.1)	<a href=&#39;?page=Annotation&feature=fig|6666666.640606.peg.957&#39; target=_blank>fig|6666666.640606.peg.957</a>, <a href=&#39;?page=Annotation&feature=fig|6666666.640606.peg.1568&#39; target=_blank>fig|6666666.640606.peg.1568</a>	yes	<a href=&#39;?page=Annotation&feature=fig|6666666.640605.peg.524&#39; target=_blank>fig|6666666.640605.peg.524</a>, <a href=&#39;?page=Annotation&feature=fig|6666666.640605.peg.3540&#39; target=_blank>fig|6666666.640605.peg.3540</a>	yes
A and B	Carbohydrates	Monosaccharides	Deoxyribose and Deoxynucleoside Catabolism	Ribokinase (EC 2.7.1.15)	<a href=&#39;?page=Annotation&feature=fig|6666666.640606.peg.2913&#39; target=_blank>fig|6666666.640606.peg.2913</a>	yes	<a href=&#39;?page=Annotation&feature=fig|6666666.640605.peg.1920&#39; target=_blank>fig|6666666.640605.peg.1920</a>	yes
A and B	Carbohydrates	Monosaccharides	Xylose utilization	D-xylose proton-symporter XylE	<a href=&#39;?page=Annotation&feature=fig|6666666.640606.peg.681&#39; target=_blank>fig|6666666.640606.peg.681</a>	yes	<a href=&#39;?page=Annotation&feature=fig|6666666.640605.peg.59&#39; target=_blank>fig|6666666.640605.peg.59</a>	yes
A and B	Carbohydrates	Monosaccharides	Xylose utilization	Xylose isomerase (EC 5.3.1.5)	<a href=&#39;?page=Annotation&feature=fig|6666666.640606.peg.2311&#39; target=_blank>fig|6666666.640606.peg.2311</a>	yes	<a href=&#39;?page=Annotation&feature=fig|6666666.640605.peg.2949&#39; target=_blank>fig|6666666.640605.peg.2949</a>	yes
A and B	Carbohydrates	Monosaccharides	Xylose utilization	Xylulose kinase (EC 2.7.1.17)	<a href=&#39;?page=Annotation&feature=fig|6666666.640606.peg.2312&#39; target=_blank>fig|6666666.640606.peg.2312</a>	yes	<a href=&#39;?page=Annotation&feature=fig|6666666.640605.peg.2950&#39; target=_blank>fig|6666666.640605.peg.2950</a>	yes
A	Carbohydrates	Monosaccharides	D-Galacturonate and D-Glucuronate Utilization	Endo-1,4-beta-xylanase A precursor (EC 3.2.1.8)	<a href=&#39;?page=Annotation&feature=fig|6666666.640606.peg.1685&#39; target=_blank>fig|6666666.640606.peg.1685</a>	yes	<input type=&#39;button&#39; class=&#39;button&#39; value=&#39;find&#39; onclick=&#39;window.open("?page=SearchGene&fr=Endo-1,4-beta-xylanase A precursor (EC 3.2.1.8)&organism=6666666.640605&subsystem=D-Galacturonate_and_D-Glucuronate_Utilization&template_gene=fig|6666666.640606.peg.1685");&#39;>	no
A	Carbohydrates	Monosaccharides	D-gluconate and ketogluconates metabolism	Gluconokinase (EC 2.7.1.12)	<a href=&#39;?page=Annotation&feature=fig|6666666.640606.peg.2763&#39; target=_blank>fig|6666666.640606.peg.2763</a>	yes	<input type=&#39;button&#39; class=&#39;button&#39; value=&#39;find&#39; onclick=&#39;window.open("?page=SearchGene&fr=Gluconokinase (EC 2.7.1.12)&organism=6666666.640605&subsystem=D-gluconate_and_ketogluconates_metabolism&template_gene=fig|6666666.640606.peg.2763");&#39;>	no
B	Carbohydrates	Monosaccharides	D-Galacturonate and D-Glucuronate Utilization	Pectin degradation protein KdgF	<input type=&#39;button&#39; value=&#39;find&#39; onclick=&#39;window.open("?page=SearchGene&fr=Pectin degradation protein KdgF&organism=6666666.640606&subsystem=D-Galacturonate_and_D-Glucuronate_Utilization&template_gene=fig|6666666.640605.peg.882");&#39;>	no	<a href=&#39;?page=Annotation&feature=fig|6666666.640605.peg.882&#39; target=_blank>fig|6666666.640605.peg.882</a>	yes
B	Carbohydrates	Monosaccharides	Deoxyribose and Deoxynucleoside Catabolism	Putative deoxyribonuclease YjjV	<input type=&#39;button&#39; value=&#39;find&#39; onclick=&#39;window.open("?page=SearchGene&fr=Putative deoxyribonuclease YjjV&organism=6666666.640606&subsystem=Deoxyribose_and_Deoxynucleoside_Catabolism&template_gene=fig|6666666.640605.peg.3299");&#39;>	no	<a href=&#39;?page=Annotation&feature=fig|6666666.640605.peg.3299&#39; target=_blank>fig|6666666.640605.peg.3299</a>	yes
A and B	Carbohydrates	One-carbon Metabolism	One-carbon metabolism by tetrahydropterines	5,10-methylenetetrahydrofolate reductase (EC 1.5.1.20)	<a href=&#39;?page=Annotation&feature=fig|6666666.640606.peg.614&#39; target=_blank>fig|6666666.640606.peg.614</a>	yes	<a href=&#39;?page=Annotation&feature=fig|6666666.640605.peg.1632&#39; target=_blank>fig|6666666.640605.peg.1632</a>	yes
A and B	Carbohydrates	One-carbon Metabolism	One-carbon metabolism by tetrahydropterines	5-formyltetrahydrofolate cyclo-ligase (EC 6.3.3.2)	<a href=&#39;?page=Annotation&feature=fig|6666666.640606.peg.934&#39; target=_blank>fig|6666666.640606.peg.934</a>	yes	<a href=&#39;?page=Annotation&feature=fig|6666666.640605.peg.2067&#39; target=_blank>fig|6666666.640605.peg.2067</a>	yes
A and B	Carbohydrates	One-carbon Metabolism	One-carbon metabolism by tetrahydropterines	Formyltetrahydrofolate deformylase (EC 3.5.1.10)	<a href=&#39;?page=Annotation&feature=fig|6666666.640606.peg.1971&#39; target=_blank>fig|6666666.640606.peg.1971</a>	yes	<a href=&#39;?page=Annotation&feature=fig|6666666.640605.peg.765&#39; target=_blank>fig|6666666.640605.peg.765</a>	yes
A and B	Carbohydrates	One-carbon Metabolism	One-carbon metabolism by tetrahydropterines	Methenyltetrahydrofolate cyclohydrolase (EC 3.5.4.9)	<a href=&#39;?page=Annotation&feature=fig|6666666.640606.peg.2694&#39; target=_blank>fig|6666666.640606.peg.2694</a>	yes	<a href=&#39;?page=Annotation&feature=fig|6666666.640605.peg.420&#39; target=_blank>fig|6666666.640605.peg.420</a>	yes
A and B	Carbohydrates	One-carbon Metabolism	One-carbon metabolism by tetrahydropterines	Methylenetetrahydrofolate dehydrogenase (NADP+) (EC 1.5.1.5)	<a href=&#39;?page=Annotation&feature=fig|6666666.640606.peg.2694&#39; target=_blank>fig|6666666.640606.peg.2694</a>	yes	<a href=&#39;?page=Annotation&feature=fig|6666666.640605.peg.420&#39; target=_blank>fig|6666666.640605.peg.420</a>	yes
A and B	Carbohydrates	Organic acids	Glycerate metabolism	D-glycerate transporter (predicted)	<a href=&#39;?page=Annotation&feature=fig|6666666.640606.peg.3123&#39; target=_blank>fig|6666666.640606.peg.3123</a>	yes	<a href=&#39;?page=Annotation&feature=fig|6666666.640605.peg.3837&#39; target=_blank>fig|6666666.640605.peg.3837</a>	yes
A and B	Carbohydrates	Organic acids	Glycerate metabolism	Glycerate kinase (EC 2.7.1.31)	<a href=&#39;?page=Annotation&feature=fig|6666666.640606.peg.2209&#39; target=_blank>fig|6666666.640606.peg.2209</a>	yes	<a href=&#39;?page=Annotation&feature=fig|6666666.640605.peg.1698&#39; target=_blank>fig|6666666.640605.peg.1698</a>	yes
A and B	Carbohydrates	Organic acids	Glycerate metabolism	Hydroxypyruvate isomerase (EC 5.3.1.22)	<a href=&#39;?page=Annotation&feature=fig|6666666.640606.peg.1786&#39; target=_blank>fig|6666666.640606.peg.1786</a>, <a href=&#39;?page=Annotation&feature=fig|6666666.640606.peg.3430&#39; target=_blank>fig|6666666.640606.peg.3430</a>	yes	<a href=&#39;?page=Annotation&feature=fig|6666666.640605.peg.587&#39; target=_blank>fig|6666666.640605.peg.587</a>, <a href=&#39;?page=Annotation&feature=fig|6666666.640605.peg.3104&#39; target=_blank>fig|6666666.640605.peg.3104</a>	yes
A and B	Carbohydrates	Organic acids	Glycerate metabolism	Pyruvate kinase (EC 2.7.1.40)	<a href=&#39;?page=Annotation&feature=fig|6666666.640606.peg.488&#39; target=_blank>fig|6666666.640606.peg.488</a>	yes	<a href=&#39;?page=Annotation&feature=fig|6666666.640605.peg.123&#39; target=_blank>fig|6666666.640605.peg.123</a>	yes
A and B	Carbohydrates	Organic acids	Lactate utilization	Predicted L-lactate dehydrogenase, Fe-S oxidoreductase subunit YkgE	<a href=&#39;?page=Annotation&feature=fig|6666666.640606.peg.2836&#39; target=_blank>fig|6666666.640606.peg.2836</a>	yes	<a href=&#39;?page=Annotation&feature=fig|6666666.640605.peg.1098&#39; target=_blank>fig|6666666.640605.peg.1098</a>	yes
A and B	Carbohydrates	Organic acids	Lactate utilization	Predicted L-lactate dehydrogenase, Iron-sulfur cluster-binding subunit YkgF	<a href=&#39;?page=Annotation&feature=fig|6666666.640606.peg.2837&#39; target=_blank>fig|6666666.640606.peg.2837</a>	yes	<a href=&#39;?page=Annotation&feature=fig|6666666.640605.peg.1097&#39; target=_blank>fig|6666666.640605.peg.1097</a>	yes
A and B	Carbohydrates	Organic acids	Lactate utilization	Predicted L-lactate dehydrogenase, hypothetical protein subunit SO1518	<a href=&#39;?page=Annotation&feature=fig|6666666.640606.peg.2838&#39; target=_blank>fig|6666666.640606.peg.2838</a>	yes	<a href=&#39;?page=Annotation&feature=fig|6666666.640605.peg.1096&#39; target=_blank>fig|6666666.640605.peg.1096</a>	yes
A and B	Carbohydrates	Polysaccharides	Glycogen metabolism	1,4-alpha-glucan (glycogen) branching enzyme, GH-13-type (EC 2.4.1.18)	<a href=&#39;?page=Annotation&feature=fig|6666666.640606.peg.3360&#39; target=_blank>fig|6666666.640606.peg.3360</a>	yes	<a href=&#39;?page=Annotation&feature=fig|6666666.640605.peg.176&#39; target=_blank>fig|6666666.640605.peg.176</a>	yes
A and B	Carbohydrates	Polysaccharides	Glycogen metabolism	Glycogen phosphorylase (EC 2.4.1.1)	<a href=&#39;?page=Annotation&feature=fig|6666666.640606.peg.1165&#39; target=_blank>fig|6666666.640606.peg.1165</a>	yes	<a href=&#39;?page=Annotation&feature=fig|6666666.640605.peg.887&#39; target=_blank>fig|6666666.640605.peg.887</a>	yes
A and B	Carbohydrates	Polysaccharides	Glycogen metabolism	Putative glycogen debranching enzyme, archaeal type, TIGR01561	<a href=&#39;?page=Annotation&feature=fig|6666666.640606.peg.3486&#39; target=_blank>fig|6666666.640606.peg.3486</a>	yes	<a href=&#39;?page=Annotation&feature=fig|6666666.640605.peg.1996&#39; target=_blank>fig|6666666.640605.peg.1996</a>	yes
A and B	Carbohydrates	Sugar alcohols	Glycerol and Glycerol-3-phosphate Uptake and Utilization	Glycerol kinase (EC 2.7.1.30)	<a href=&#39;?page=Annotation&feature=fig|6666666.640606.peg.983&#39; target=_blank>fig|6666666.640606.peg.983</a>	yes	<a href=&#39;?page=Annotation&feature=fig|6666666.640605.peg.3447&#39; target=_blank>fig|6666666.640605.peg.3447</a>	yes
A and B	Carbohydrates	Sugar alcohols	Glycerol and Glycerol-3-phosphate Uptake and Utilization	Glycerol uptake facilitator protein	<a href=&#39;?page=Annotation&feature=fig|6666666.640606.peg.984&#39; target=_blank>fig|6666666.640606.peg.984</a>	yes	<a href=&#39;?page=Annotation&feature=fig|6666666.640605.peg.3448&#39; target=_blank>fig|6666666.640605.peg.3448</a>	yes
A and B	Carbohydrates	Sugar alcohols	Glycerol and Glycerol-3-phosphate Uptake and Utilization	Glycerol-3-phosphate dehydrogenase (EC 1.1.5.3)	<a href=&#39;?page=Annotation&feature=fig|6666666.640606.peg.982&#39; target=_blank>fig|6666666.640606.peg.982</a>	yes	<a href=&#39;?page=Annotation&feature=fig|6666666.640605.peg.3446&#39; target=_blank>fig|6666666.640605.peg.3446</a>	yes
A and B	Carbohydrates	Sugar alcohols	Glycerol and Glycerol-3-phosphate Uptake and Utilization	Glycerol-3-phosphate dehydrogenase [NAD(P)+] (EC 1.1.1.94)	<a href=&#39;?page=Annotation&feature=fig|6666666.640606.peg.3500&#39; target=_blank>fig|6666666.640606.peg.3500</a>	yes	<a href=&#39;?page=Annotation&feature=fig|6666666.640605.peg.2012&#39; target=_blank>fig|6666666.640605.peg.2012</a>	yes
A and B	Carbohydrates	Sugar alcohols	Glycerol and Glycerol-3-phosphate Uptake and Utilization	Glycerophosphoryl diester phosphodiesterase (EC 3.1.4.46)	<a href=&#39;?page=Annotation&feature=fig|6666666.640606.peg.2916&#39; target=_blank>fig|6666666.640606.peg.2916</a>, <a href=&#39;?page=Annotation&feature=fig|6666666.640606.peg.3407&#39; target=_blank>fig|6666666.640606.peg.3407</a>	yes	<a href=&#39;?page=Annotation&feature=fig|6666666.640605.peg.938&#39; target=_blank>fig|6666666.640605.peg.938</a>, <a href=&#39;?page=Annotation&feature=fig|6666666.640605.peg.3797&#39; target=_blank>fig|6666666.640605.peg.3797</a>	yes
A	Carbohydrates	Sugar alcohols	Glycerol and Glycerol-3-phosphate Uptake and Utilization	Glycerol-3-phosphate regulon repressor GlpR	<a href=&#39;?page=Annotation&feature=fig|6666666.640606.peg.981&#39; target=_blank>fig|6666666.640606.peg.981</a>	yes	<input type=&#39;button&#39; class=&#39;button&#39; value=&#39;find&#39; onclick=&#39;window.open("?page=SearchGene&fr=Glycerol-3-phosphate regulon repressor GlpR&organism=6666666.640605&subsystem=Glycerol_and_Glycerol-3-phosphate_Uptake_and_Utilization&template_gene=fig|6666666.640606.peg.981");&#39;>	no
A and B	Carbohydrates	no subcategory	VC0266	Hypothetical protein VC0266 (sugar utilization related?)	<a href=&#39;?page=Annotation&feature=fig|6666666.640606.peg.3592&#39; target=_blank>fig|6666666.640606.peg.3592</a>	yes	<a href=&#39;?page=Annotation&feature=fig|6666666.640605.peg.193&#39; target=_blank>fig|6666666.640605.peg.193</a>	yes
A and B	Cell Division and Cell Cycle	Checkpoint control	Bacterial checkpoint-control-related cluster	Bacterial checkpoint controller DisA with nucleotide-binding domain	<a href=&#39;?page=Annotation&feature=fig|6666666.640606.peg.2369&#39; target=_blank>fig|6666666.640606.peg.2369</a>	yes	<a href=&#39;?page=Annotation&feature=fig|6666666.640605.peg.366&#39; target=_blank>fig|6666666.640605.peg.366</a>	yes
A and B	Cell Division and Cell Cycle	Checkpoint control	Bacterial checkpoint-control-related cluster	Diadenylate cyclase spyDAC	<a href=&#39;?page=Annotation&feature=fig|6666666.640606.peg.2369&#39; target=_blank>fig|6666666.640606.peg.2369</a>	yes	<a href=&#39;?page=Annotation&feature=fig|6666666.640605.peg.366&#39; target=_blank>fig|6666666.640605.peg.366</a>	yes
A and B	Cell Division and Cell Cycle	Checkpoint control	Bacterial checkpoint-control-related cluster	Phosphoglucosamine mutase (EC 5.4.2.10)	<a href=&#39;?page=Annotation&feature=fig|6666666.640606.peg.1818&#39; target=_blank>fig|6666666.640606.peg.1818</a>	yes	<a href=&#39;?page=Annotation&feature=fig|6666666.640605.peg.2144&#39; target=_blank>fig|6666666.640605.peg.2144</a>	yes
A and B	Cell Wall and Capsule	Capsular and extracellular polysacchrides	CMP-N-acetylneuraminate Biosynthesis	N-acetylneuraminate synthase (EC 2.5.1.56)	<a href=&#39;?page=Annotation&feature=fig|6666666.640606.peg.2545&#39; target=_blank>fig|6666666.640606.peg.2545</a>	yes	<a href=&#39;?page=Annotation&feature=fig|6666666.640605.peg.2355&#39; target=_blank>fig|6666666.640605.peg.2355</a>	yes
A and B	Cell Wall and Capsule	Capsular and extracellular polysacchrides	CMP-N-acetylneuraminate Biosynthesis	UDP-N-acetylglucosamine 2-epimerase (EC 5.1.3.14)	<a href=&#39;?page=Annotation&feature=fig|6666666.640606.peg.2065&#39; target=_blank>fig|6666666.640606.peg.2065</a>, <a href=&#39;?page=Annotation&feature=fig|6666666.640606.peg.2544&#39; target=_blank>fig|6666666.640606.peg.2544</a>	yes	<a href=&#39;?page=Annotation&feature=fig|6666666.640605.peg.659&#39; target=_blank>fig|6666666.640605.peg.659</a>, <a href=&#39;?page=Annotation&feature=fig|6666666.640605.peg.2356&#39; target=_blank>fig|6666666.640605.peg.2356</a>, <a href=&#39;?page=Annotation&feature=fig|6666666.640605.peg.2538&#39; target=_blank>fig|6666666.640605.peg.2538</a>	yes
A and B	Cell Wall and Capsule	Capsular and extracellular polysacchrides	Rhamnose containing glycans	Alpha-D-GlcNAc alpha-1,2-L-rhamnosyltransferase (EC 2.4.1.-)	<a href=&#39;?page=Annotation&feature=fig|6666666.640606.peg.1822&#39; target=_blank>fig|6666666.640606.peg.1822</a>	yes	<a href=&#39;?page=Annotation&feature=fig|6666666.640605.peg.2837&#39; target=_blank>fig|6666666.640605.peg.2837</a>	yes
A and B	Cell Wall and Capsule	Capsular and extracellular polysacchrides	Rhamnose containing glycans	Glucose-1-phosphate thymidylyltransferase (EC 2.7.7.24)	<a href=&#39;?page=Annotation&feature=fig|6666666.640606.peg.787&#39; target=_blank>fig|6666666.640606.peg.787</a>	yes	<a href=&#39;?page=Annotation&feature=fig|6666666.640605.peg.1724&#39; target=_blank>fig|6666666.640605.peg.1724</a>	yes
A and B	Cell Wall and Capsule	Capsular and extracellular polysacchrides	Rhamnose containing glycans	Teichoic acid export ATP-binding protein TagH (EC 3.6.3.40)	<a href=&#39;?page=Annotation&feature=fig|6666666.640606.peg.2522&#39; target=_blank>fig|6666666.640606.peg.2522</a>	yes	<a href=&#39;?page=Annotation&feature=fig|6666666.640605.peg.2392&#39; target=_blank>fig|6666666.640605.peg.2392</a>	yes
A and B	Cell Wall and Capsule	Capsular and extracellular polysacchrides	Rhamnose containing glycans	UDP-glucose 4-epimerase (EC 5.1.3.2)	<a href=&#39;?page=Annotation&feature=fig|6666666.640606.peg.259&#39; target=_blank>fig|6666666.640606.peg.259</a>, <a href=&#39;?page=Annotation&feature=fig|6666666.640606.peg.2555&#39; target=_blank>fig|6666666.640606.peg.2555</a>, <a href=&#39;?page=Annotation&feature=fig|6666666.640606.peg.3265&#39; target=_blank>fig|6666666.640606.peg.3265</a>	yes	<a href=&#39;?page=Annotation&feature=fig|6666666.640605.peg.1389&#39; target=_blank>fig|6666666.640605.peg.1389</a>, <a href=&#39;?page=Annotation&feature=fig|6666666.640605.peg.2359&#39; target=_blank>fig|6666666.640605.peg.2359</a>, <a href=&#39;?page=Annotation&feature=fig|6666666.640605.peg.2537&#39; target=_blank>fig|6666666.640605.peg.2537</a>, <a href=&#39;?page=Annotation&feature=fig|666…	yes
A and B	Cell Wall and Capsule	Capsular and extracellular polysacchrides	Rhamnose containing glycans	dTDP-4-dehydrorhamnose 3,5-epimerase (EC 5.1.3.13)	<a href=&#39;?page=Annotation&feature=fig|6666666.640606.peg.1964&#39; target=_blank>fig|6666666.640606.peg.1964</a>	yes	<a href=&#39;?page=Annotation&feature=fig|6666666.640605.peg.772&#39; target=_blank>fig|6666666.640605.peg.772</a>	yes
A and B	Cell Wall and Capsule	Capsular and extracellular polysacchrides	Rhamnose containing glycans	dTDP-4-dehydrorhamnose reductase (EC 1.1.1.133)	<a href=&#39;?page=Annotation&feature=fig|6666666.640606.peg.56&#39; target=_blank>fig|6666666.640606.peg.56</a>	yes	<a href=&#39;?page=Annotation&feature=fig|6666666.640605.peg.961&#39; target=_blank>fig|6666666.640605.peg.961</a>, <a href=&#39;?page=Annotation&feature=fig|6666666.640605.peg.2329&#39; target=_blank>fig|6666666.640605.peg.2329</a>, <a href=&#39;?page=Annotation&feature=fig|6666666.640605.peg.2547&#39; target=_blank>fig|6666666.640605.peg.2547</a>	yes
A and B	Cell Wall and Capsule	Capsular and extracellular polysacchrides	Rhamnose containing glycans	dTDP-glucose 4,6-dehydratase (EC 4.2.1.46)	<a href=&#39;?page=Annotation&feature=fig|6666666.640606.peg.724&#39; target=_blank>fig|6666666.640606.peg.724</a>, <a href=&#39;?page=Annotation&feature=fig|6666666.640606.peg.725&#39; target=_blank>fig|6666666.640606.peg.725</a>	yes	<a href=&#39;?page=Annotation&feature=fig|6666666.640605.peg.2651&#39; target=_blank>fig|6666666.640605.peg.2651</a>, <a href=&#39;?page=Annotation&feature=fig|6666666.640605.peg.2652&#39; target=_blank>fig|6666666.640605.peg.2652</a>	yes
A and B	Cell Wall and Capsule	Capsular and extracellular polysacchrides	dTDP-rhamnose synthesis	Glucose-1-phosphate thymidylyltransferase (EC 2.7.7.24)	<a href=&#39;?page=Annotation&feature=fig|6666666.640606.peg.787&#39; target=_blank>fig|6666666.640606.peg.787</a>	yes	<a href=&#39;?page=Annotation&feature=fig|6666666.640605.peg.1724&#39; target=_blank>fig|6666666.640605.peg.1724</a>	yes
A and B	Cell Wall and Capsule	Capsular and extracellular polysacchrides	dTDP-rhamnose synthesis	dTDP-4-dehydrorhamnose 3,5-epimerase (EC 5.1.3.13)	<a href=&#39;?page=Annotation&feature=fig|6666666.640606.peg.1964&#39; target=_blank>fig|6666666.640606.peg.1964</a>	yes	<a href=&#39;?page=Annotation&feature=fig|6666666.640605.peg.772&#39; target=_blank>fig|6666666.640605.peg.772</a>	yes
A and B	Cell Wall and Capsule	Capsular and extracellular polysacchrides	dTDP-rhamnose synthesis	dTDP-4-dehydrorhamnose reductase (EC 1.1.1.133)	<a href=&#39;?page=Annotation&feature=fig|6666666.640606.peg.56&#39; target=_blank>fig|6666666.640606.peg.56</a>	yes	<a href=&#39;?page=Annotation&feature=fig|6666666.640605.peg.961&#39; target=_blank>fig|6666666.640605.peg.961</a>, <a href=&#39;?page=Annotation&feature=fig|6666666.640605.peg.2329&#39; target=_blank>fig|6666666.640605.peg.2329</a>, <a href=&#39;?page=Annotation&feature=fig|6666666.640605.peg.2547&#39; target=_blank>fig|6666666.640605.peg.2547</a>	yes
A and B	Cell Wall and Capsule	Capsular and extracellular polysacchrides	dTDP-rhamnose synthesis	dTDP-glucose 4,6-dehydratase (EC 4.2.1.46)	<a href=&#39;?page=Annotation&feature=fig|6666666.640606.peg.724&#39; target=_blank>fig|6666666.640606.peg.724</a>, <a href=&#39;?page=Annotation&feature=fig|6666666.640606.peg.725&#39; target=_blank>fig|6666666.640606.peg.725</a>	yes	<a href=&#39;?page=Annotation&feature=fig|6666666.640605.peg.2651&#39; target=_blank>fig|6666666.640605.peg.2651</a>, <a href=&#39;?page=Annotation&feature=fig|6666666.640605.peg.2652&#39; target=_blank>fig|6666666.640605.peg.2652</a>	yes
A	Cell Wall and Capsule	Capsular and extracellular polysacchrides	Rhamnose containing glycans	capsular polysaccharide biosynthesis protein	<a href=&#39;?page=Annotation&feature=fig|6666666.640606.peg.2547&#39; target=_blank>fig|6666666.640606.peg.2547</a>	yes	<input type=&#39;button&#39; class=&#39;button&#39; value=&#39;find&#39; onclick=&#39;window.open("?page=SearchGene&fr=capsular polysaccharide biosynthesis protein&organism=6666666.640605&subsystem=Rhamnose_containing_glycans&template_gene=fig|6666666.640606.peg.2547");&#39;>	no
A	Cell Wall and Capsule	Capsular and extracellular polysacchrides	Rhamnose containing glycans	putative glycosyltransferase - possibly involved in cell wall localization and side chain formation of rhamnose-glucose polysaccharide	<a href=&#39;?page=Annotation&feature=fig|6666666.640606.peg.2580&#39; target=_blank>fig|6666666.640606.peg.2580</a>	yes	<input type=&#39;button&#39; class=&#39;button&#39; value=&#39;find&#39; onclick=&#39;window.open("?page=SearchGene&fr=putative glycosyltransferase - possibly involved in cell wall localization and side chain formation of rhamnose-glucose polysaccharide&organism=6666666.640605&subsystem=Rhamnose_containing_glycans&template_gene=fig|6666666.640606.peg.2580");&#39;>	no
B	Cell Wall and Capsule	Capsular and extracellular polysacchrides	Rhamnose containing glycans	Alpha-L-Rha alpha-1,3-L-rhamnosyltransferase (EC 2.4.1.-)	<input type=&#39;button&#39; value=&#39;find&#39; onclick=&#39;window.open("?page=SearchGene&fr=Alpha-L-Rha alpha-1,3-L-rhamnosyltransferase (EC 2.4.1.-)&organism=6666666.640606&subsystem=Rhamnose_containing_glycans&template_gene=fig|6666666.640605.peg.2327");&#39;>	no	<a href=&#39;?page=Annotation&feature=fig|6666666.640605.peg.2327&#39; target=_blank>fig|6666666.640605.peg.2327</a>	yes
A and B	Cell Wall and Capsule	Gram-Negative cell wall components	Lipoprotein sorting system	Outer membrane lipoprotein carrier protein LolA	<a href=&#39;?page=Annotation&feature=fig|6666666.640606.peg.1443&#39; target=_blank>fig|6666666.640606.peg.1443</a>	yes	<a href=&#39;?page=Annotation&feature=fig|6666666.640605.peg.2153&#39; target=_blank>fig|6666666.640605.peg.2153</a>	yes
A	Cell Wall and Capsule	Gram-Positive cell wall components	Teichuronic acid biosynthesis	Putative N-acetylgalactosaminyl-diphosphoundecaprenol glucuronosyltransferase	<a href=&#39;?page=Annotation&feature=fig|6666666.640606.peg.2517&#39; target=_blank>fig|6666666.640606.peg.2517</a>	yes	<input type=&#39;button&#39; class=&#39;button&#39; value=&#39;find&#39; onclick=&#39;window.open("?page=SearchGene&fr=Putative N-acetylgalactosaminyl-diphosphoundecaprenol glucuronosyltransferase&organism=6666666.640605&subsystem=Teichuronic_acid_biosynthesis&template_gene=fig|6666666.640606.peg.2517");&#39;>	no
A and B	Cell Wall and Capsule	no subcategory	Murein Hydrolases	D-alanyl-D-alanine carboxypeptidase (EC 3.4.16.4)	<a href=&#39;?page=Annotation&feature=fig|6666666.640606.peg.2431&#39; target=_blank>fig|6666666.640606.peg.2431</a>, <a href=&#39;?page=Annotation&feature=fig|6666666.640606.peg.3146&#39; target=_blank>fig|6666666.640606.peg.3146</a>	yes	<a href=&#39;?page=Annotation&feature=fig|6666666.640605.peg.1045&#39; target=_blank>fig|6666666.640605.peg.1045</a>, <a href=&#39;?page=Annotation&feature=fig|6666666.640605.peg.2443&#39; target=_blank>fig|6666666.640605.peg.2443</a>, <a href=&#39;?page=Annotation&feature=fig|6666666.640605.peg.2777&#39; target=_blank>fig|6666666.640605.peg.2777</a>, <a href=&#39;?page=Annotation&feature=fig|666…	yes
A and B	Cell Wall and Capsule	no subcategory	Murein Hydrolases	Muramoyltetrapeptide carboxypeptidase (EC 3.4.17.13)	<a href=&#39;?page=Annotation&feature=fig|6666666.640606.peg.2435&#39; target=_blank>fig|6666666.640606.peg.2435</a>	yes	<a href=&#39;?page=Annotation&feature=fig|6666666.640605.peg.2781&#39; target=_blank>fig|6666666.640605.peg.2781</a>	yes
A and B	Cell Wall and Capsule	no subcategory	Murein Hydrolases	N-acetylmuramoyl-L-alanine amidase (EC 3.5.1.28)	<a href=&#39;?page=Annotation&feature=fig|6666666.640606.peg.1053&#39; target=_blank>fig|6666666.640606.peg.1053</a>, <a href=&#39;?page=Annotation&feature=fig|6666666.640606.peg.2485&#39; target=_blank>fig|6666666.640606.peg.2485</a>	yes	<a href=&#39;?page=Annotation&feature=fig|6666666.640605.peg.314&#39; target=_blank>fig|6666666.640605.peg.314</a>	yes
A and B	Cell Wall and Capsule	no subcategory	Recycling of Peptidoglycan Amino Acids	AmpG permease	<a href=&#39;?page=Annotation&feature=fig|6666666.640606.peg.2756&#39; target=_blank>fig|6666666.640606.peg.2756</a>	yes	<a href=&#39;?page=Annotation&feature=fig|6666666.640605.peg.1292&#39; target=_blank>fig|6666666.640605.peg.1292</a>	yes
A and B	Cell Wall and Capsule	no subcategory	Recycling of Peptidoglycan Amino Acids	Muramoyltetrapeptide carboxypeptidase (EC 3.4.17.13)	<a href=&#39;?page=Annotation&feature=fig|6666666.640606.peg.2435&#39; target=_blank>fig|6666666.640606.peg.2435</a>	yes	<a href=&#39;?page=Annotation&feature=fig|6666666.640605.peg.2781&#39; target=_blank>fig|6666666.640605.peg.2781</a>	yes
A and B	Cell Wall and Capsule	no subcategory	Recycling of Peptidoglycan Amino Acids	N-acetylmuramoyl-L-alanine amidase (EC 3.5.1.28)	<a href=&#39;?page=Annotation&feature=fig|6666666.640606.peg.1053&#39; target=_blank>fig|6666666.640606.peg.1053</a>, <a href=&#39;?page=Annotation&feature=fig|6666666.640606.peg.2485&#39; target=_blank>fig|6666666.640606.peg.2485</a>	yes	<a href=&#39;?page=Annotation&feature=fig|6666666.640605.peg.314&#39; target=_blank>fig|6666666.640605.peg.314</a>	yes
B	Cell Wall and Capsule	no subcategory	UDP-N-acetylmuramate from Fructose-6-phosphate Biosynthesis	Glucosamine-1-phosphate N-acetyltransferase (EC 2.3.1.157)	<input type=&#39;button&#39; value=&#39;find&#39; onclick=&#39;window.open("?page=SearchGene&fr=Glucosamine-1-phosphate N-acetyltransferase (EC 2.3.1.157)&organism=6666666.640606&subsystem=UDP-N-acetylmuramate_from_Fructose-6-phosphate_Biosynthesis&template_gene=fig|6666666.640605.peg.522");&#39;>	no	<a href=&#39;?page=Annotation&feature=fig|6666666.640605.peg.522&#39; target=_blank>fig|6666666.640605.peg.522</a>	yes
B	Cell Wall and Capsule	no subcategory	UDP-N-acetylmuramate from Fructose-6-phosphate Biosynthesis	N-acetylglucosamine-1-phosphate uridyltransferase (EC 2.7.7.23)	<input type=&#39;button&#39; value=&#39;find&#39; onclick=&#39;window.open("?page=SearchGene&fr=N-acetylglucosamine-1-phosphate uridyltransferase (EC 2.7.7.23)&organism=6666666.640606&subsystem=UDP-N-acetylmuramate_from_Fructose-6-phosphate_Biosynthesis&template_gene=fig|6666666.640605.peg.522");&#39;>	no	<a href=&#39;?page=Annotation&feature=fig|6666666.640605.peg.522&#39; target=_blank>fig|6666666.640605.peg.522</a>	yes
A and B	Clustering-based subsystems	Cell Division	Septum site-determining cluster Min	Septum site-determining protein MinD	<a href=&#39;?page=Annotation&feature=fig|6666666.640606.peg.3581&#39; target=_blank>fig|6666666.640606.peg.3581</a>	yes	<a href=&#39;?page=Annotation&feature=fig|6666666.640605.peg.88&#39; target=_blank>fig|6666666.640605.peg.88</a>	yes
A and B	Clustering-based subsystems	Cofactors	Riboflavin synthesis cluster	3,4-dihydroxy-2-butanone 4-phosphate synthase (EC 4.1.99.12)	<a href=&#39;?page=Annotation&feature=fig|6666666.640606.peg.3579&#39; target=_blank>fig|6666666.640606.peg.3579</a>	yes	<a href=&#39;?page=Annotation&feature=fig|6666666.640605.peg.86&#39; target=_blank>fig|6666666.640605.peg.86</a>	yes
A and B	Clustering-based subsystems	Cofactors	Riboflavin synthesis cluster	5-amino-6-(5-phosphoribosylamino)uracil reductase (EC 1.1.1.193)	<a href=&#39;?page=Annotation&feature=fig|6666666.640606.peg.1857&#39; target=_blank>fig|6666666.640606.peg.1857</a>	yes	<a href=&#39;?page=Annotation&feature=fig|6666666.640605.peg.778&#39; target=_blank>fig|6666666.640605.peg.778</a>	yes
A and B	Clustering-based subsystems	Cofactors	Riboflavin synthesis cluster	6,7-dimethyl-8-ribityllumazine synthase (EC 2.5.1.78)	<a href=&#39;?page=Annotation&feature=fig|6666666.640606.peg.1735&#39; target=_blank>fig|6666666.640606.peg.1735</a>	yes	<a href=&#39;?page=Annotation&feature=fig|6666666.640605.peg.2106&#39; target=_blank>fig|6666666.640605.peg.2106</a>	yes
A and B	Clustering-based subsystems	Cofactors	Riboflavin synthesis cluster	Diaminohydroxyphosphoribosylaminopyrimidine deaminase (EC 3.5.4.26)	<a href=&#39;?page=Annotation&feature=fig|6666666.640606.peg.1857&#39; target=_blank>fig|6666666.640606.peg.1857</a>	yes	<a href=&#39;?page=Annotation&feature=fig|6666666.640605.peg.778&#39; target=_blank>fig|6666666.640605.peg.778</a>	yes
A and B	Clustering-based subsystems	Cofactors	Riboflavin synthesis cluster	GTP cyclohydrolase II (EC 3.5.4.25)	<a href=&#39;?page=Annotation&feature=fig|6666666.640606.peg.3579&#39; target=_blank>fig|6666666.640606.peg.3579</a>	yes	<a href=&#39;?page=Annotation&feature=fig|6666666.640605.peg.86&#39; target=_blank>fig|6666666.640605.peg.86</a>	yes
A and B	Clustering-based subsystems	Cofactors	Riboflavin synthesis cluster	Inner membrane protein YihY, formerly thought to be RNase BN	<a href=&#39;?page=Annotation&feature=fig|6666666.640606.peg.3019&#39; target=_blank>fig|6666666.640606.peg.3019</a>	yes	<a href=&#39;?page=Annotation&feature=fig|6666666.640605.peg.1201&#39; target=_blank>fig|6666666.640605.peg.1201</a>	yes
A and B	Clustering-based subsystems	Cofactors	Riboflavin synthesis cluster	NADH dehydrogenase (EC 1.6.99.3)	<a href=&#39;?page=Annotation&feature=fig|6666666.640606.peg.1249&#39; target=_blank>fig|6666666.640606.peg.1249</a>	yes	<a href=&#39;?page=Annotation&feature=fig|6666666.640605.peg.3311&#39; target=_blank>fig|6666666.640605.peg.3311</a>	yes
A and B	Clustering-based subsystems	Cofactors	Riboflavin synthesis cluster	Orotidine 5&#39;-phosphate decarboxylase (EC 4.1.1.23)	<a href=&#39;?page=Annotation&feature=fig|6666666.640606.peg.1564&#39; target=_blank>fig|6666666.640606.peg.1564</a>	yes	<a href=&#39;?page=Annotation&feature=fig|6666666.640605.peg.519&#39; target=_blank>fig|6666666.640605.peg.519</a>	yes
A and B	Clustering-based subsystems	Cofactors	Riboflavin synthesis cluster	Phosphoribosyl-ATP pyrophosphatase (EC 3.6.1.31)	<a href=&#39;?page=Annotation&feature=fig|6666666.640606.peg.2794&#39; target=_blank>fig|6666666.640606.peg.2794</a>	yes	<a href=&#39;?page=Annotation&feature=fig|6666666.640605.peg.1244&#39; target=_blank>fig|6666666.640605.peg.1244</a>	yes
A and B	Clustering-based subsystems	Cofactors	Riboflavin synthesis cluster	Riboflavin synthase eubacterial/eukaryotic (EC 2.5.1.9)	<a href=&#39;?page=Annotation&feature=fig|6666666.640606.peg.740&#39; target=_blank>fig|6666666.640606.peg.740</a>	yes	<a href=&#39;?page=Annotation&feature=fig|6666666.640605.peg.1732&#39; target=_blank>fig|6666666.640605.peg.1732</a>	yes
A and B	Clustering-based subsystems	Cofactors	Riboflavin synthesis cluster	Ribulose-phosphate 3-epimerase (EC 5.1.3.1)	<a href=&#39;?page=Annotation&feature=fig|6666666.640606.peg.2293&#39; target=_blank>fig|6666666.640606.peg.2293</a>	yes	<a href=&#39;?page=Annotation&feature=fig|6666666.640605.peg.1654&#39; target=_blank>fig|6666666.640605.peg.1654</a>	yes
A and B	Clustering-based subsystems	Cofactors	Riboflavin synthesis cluster	Thiamine-monophosphate kinase (EC 2.7.4.16)	<a href=&#39;?page=Annotation&feature=fig|6666666.640606.peg.2455&#39; target=_blank>fig|6666666.640606.peg.2455</a>	yes	<a href=&#39;?page=Annotation&feature=fig|6666666.640605.peg.295&#39; target=_blank>fig|6666666.640605.peg.295</a>	yes
A and B	Clustering-based subsystems	Cofactors	Riboflavin synthesis cluster	Transcription termination protein NusB	<a href=&#39;?page=Annotation&feature=fig|6666666.640606.peg.1371&#39; target=_blank>fig|6666666.640606.peg.1371</a>	yes	<a href=&#39;?page=Annotation&feature=fig|6666666.640605.peg.3403&#39; target=_blank>fig|6666666.640605.peg.3403</a>	yes
B	Clustering-based subsystems	Cofactors	Riboflavin synthesis cluster	Diacylglycerol kinase (EC 2.7.1.107)	<input type=&#39;button&#39; value=&#39;find&#39; onclick=&#39;window.open("?page=SearchGene&fr=Diacylglycerol kinase (EC 2.7.1.107)&organism=6666666.640606&subsystem=Riboflavin_synthesis_cluster&template_gene=fig|6666666.640605.peg.1332");&#39;>	no	<a href=&#39;?page=Annotation&feature=fig|6666666.640605.peg.1332&#39; target=_blank>fig|6666666.640605.peg.1332</a>	yes
A and B	Clustering-based subsystems	DNA metabolism	Rad50-Mre11 DNA repair cluster	Exonuclease SbcC	<a href=&#39;?page=Annotation&feature=fig|6666666.640606.peg.1694&#39; target=_blank>fig|6666666.640606.peg.1694</a>	yes	<a href=&#39;?page=Annotation&feature=fig|6666666.640605.peg.3709&#39; target=_blank>fig|6666666.640605.peg.3709</a>	yes
A and B	Clustering-based subsystems	DNA metabolism	Rad50-Mre11 DNA repair cluster	Exonuclease SbcD	<a href=&#39;?page=Annotation&feature=fig|6666666.640606.peg.1695&#39; target=_blank>fig|6666666.640606.peg.1695</a>	yes	<a href=&#39;?page=Annotation&feature=fig|6666666.640605.peg.3710&#39; target=_blank>fig|6666666.640605.peg.3710</a>	yes
A and B	Clustering-based subsystems	DNA polymerase III epsilon cluster	CBSS-342610.3.peg.1536	DNA polymerase III epsilon subunit (EC 2.7.7.7)	<a href=&#39;?page=Annotation&feature=fig|6666666.640606.peg.452&#39; target=_blank>fig|6666666.640606.peg.452</a>	yes	<a href=&#39;?page=Annotation&feature=fig|6666666.640605.peg.559&#39; target=_blank>fig|6666666.640605.peg.559</a>, <a href=&#39;?page=Annotation&feature=fig|6666666.640605.peg.2556&#39; target=_blank>fig|6666666.640605.peg.2556</a>	yes
A and B	Clustering-based subsystems	DNA polymerase III epsilon cluster	CBSS-342610.3.peg.1536	Predicted signal-transduction protein containing cAMP-binding and CBS domains	<a href=&#39;?page=Annotation&feature=fig|6666666.640606.peg.2005&#39; target=_blank>fig|6666666.640606.peg.2005</a>, <a href=&#39;?page=Annotation&feature=fig|6666666.640606.peg.2764&#39; target=_blank>fig|6666666.640606.peg.2764</a>	yes	<a href=&#39;?page=Annotation&feature=fig|6666666.640605.peg.558&#39; target=_blank>fig|6666666.640605.peg.558</a>, <a href=&#39;?page=Annotation&feature=fig|6666666.640605.peg.1131&#39; target=_blank>fig|6666666.640605.peg.1131</a>	yes
A and B	Clustering-based subsystems	DNA polymerase III epsilon cluster	CBSS-342610.3.peg.1536	Ribonuclease HI (EC 3.1.26.4)	<a href=&#39;?page=Annotation&feature=fig|6666666.640606.peg.1600&#39; target=_blank>fig|6666666.640606.peg.1600</a>	yes	<a href=&#39;?page=Annotation&feature=fig|6666666.640605.peg.3457&#39; target=_blank>fig|6666666.640605.peg.3457</a>	yes
A and B	Clustering-based subsystems	Isoprenoid/cell wall biosynthesis: PREDICTED UNDECAPRENYL DIPHOSPHATE PHOSPHATASE	CBSS-83331.1.peg.3039	1-deoxy-D-xylulose 5-phosphate reductoisomerase (EC 1.1.1.267)	<a href=&#39;?page=Annotation&feature=fig|6666666.640606.peg.3097&#39; target=_blank>fig|6666666.640606.peg.3097</a>	yes	<a href=&#39;?page=Annotation&feature=fig|6666666.640605.peg.1363&#39; target=_blank>fig|6666666.640605.peg.1363</a>	yes
A and B	Clustering-based subsystems	Isoprenoid/cell wall biosynthesis: PREDICTED UNDECAPRENYL DIPHOSPHATE PHOSPHATASE	CBSS-83331.1.peg.3039	Cell division protein FtsI [Peptidoglycan synthetase] (EC 2.4.1.129)	<a href=&#39;?page=Annotation&feature=fig|6666666.640606.peg.968&#39; target=_blank>fig|6666666.640606.peg.968</a>	yes	<a href=&#39;?page=Annotation&feature=fig|6666666.640605.peg.3529&#39; target=_blank>fig|6666666.640605.peg.3529</a>	yes
A and B	Clustering-based subsystems	Isoprenoid/cell wall biosynthesis: PREDICTED UNDECAPRENYL DIPHOSPHATE PHOSPHATASE	CBSS-83331.1.peg.3039	Undecaprenyl diphosphate synthase (EC 2.5.1.31)	<a href=&#39;?page=Annotation&feature=fig|6666666.640606.peg.1354&#39; target=_blank>fig|6666666.640606.peg.1354</a>	yes	<a href=&#39;?page=Annotation&feature=fig|6666666.640605.peg.3383&#39; target=_blank>fig|6666666.640605.peg.3383</a>	yes
A and B	Clustering-based subsystems	Lysine, threonine, methionine, and cysteine	CBSS-84588.1.peg.1247	Cysteine desulfurase (EC 2.8.1.7)	<a href=&#39;?page=Annotation&feature=fig|6666666.640606.peg.852&#39; target=_blank>fig|6666666.640606.peg.852</a>, <a href=&#39;?page=Annotation&feature=fig|6666666.640606.peg.875&#39; target=_blank>fig|6666666.640606.peg.875</a>, <a href=&#39;?page=Annotation&feature=fig|6666666.640606.peg.1817&#39; target=_blank>fig|6666666.640606.peg.1817</a>, <a href=&#39;?page=Annotation&feature=fig|6666666…	yes	<a href=&#39;?page=Annotation&feature=fig|6666666.640605.peg.284&#39; target=_blank>fig|6666666.640605.peg.284</a>, <a href=&#39;?page=Annotation&feature=fig|6666666.640605.peg.1779&#39; target=_blank>fig|6666666.640605.peg.1779</a>, <a href=&#39;?page=Annotation&feature=fig|6666666.640605.peg.1799&#39; target=_blank>fig|6666666.640605.peg.1799</a>, <a href=&#39;?page=Annotation&feature=fig|66666…	yes
A and B	Clustering-based subsystems	Lysine, threonine, methionine, and cysteine	CBSS-84588.1.peg.1247	D-alanyl-D-alanine carboxypeptidase (EC 3.4.16.4)	<a href=&#39;?page=Annotation&feature=fig|6666666.640606.peg.2431&#39; target=_blank>fig|6666666.640606.peg.2431</a>, <a href=&#39;?page=Annotation&feature=fig|6666666.640606.peg.3146&#39; target=_blank>fig|6666666.640606.peg.3146</a>	yes	<a href=&#39;?page=Annotation&feature=fig|6666666.640605.peg.1045&#39; target=_blank>fig|6666666.640605.peg.1045</a>, <a href=&#39;?page=Annotation&feature=fig|6666666.640605.peg.2443&#39; target=_blank>fig|6666666.640605.peg.2443</a>, <a href=&#39;?page=Annotation&feature=fig|6666666.640605.peg.2777&#39; target=_blank>fig|6666666.640605.peg.2777</a>, <a href=&#39;?page=Annotation&feature=fig|666…	yes
A and B	Clustering-based subsystems	Lysine, threonine, methionine, and cysteine	CBSS-84588.1.peg.1247	Diaminopimelate epimerase (EC 5.1.1.7)	<a href=&#39;?page=Annotation&feature=fig|6666666.640606.peg.1893&#39; target=_blank>fig|6666666.640606.peg.1893</a>	yes	<a href=&#39;?page=Annotation&feature=fig|6666666.640605.peg.845&#39; target=_blank>fig|6666666.640605.peg.845</a>	yes
A and B	Clustering-based subsystems	May be related to ADP-phosphoribose and NAD-dependent acetylation	CBSS-216591.1.peg.168	ADP-ribose pyrophosphatase (EC 3.6.1.13)	<a href=&#39;?page=Annotation&feature=fig|6666666.640606.peg.657&#39; target=_blank>fig|6666666.640606.peg.657</a>	yes	<a href=&#39;?page=Annotation&feature=fig|6666666.640605.peg.2584&#39; target=_blank>fig|6666666.640605.peg.2584</a>	yes
A and B	Clustering-based subsystems	May be related to ADP-phosphoribose and NAD-dependent acetylation	CBSS-216591.1.peg.168	Aspartate aminotransferase (EC 2.6.1.1)	<a href=&#39;?page=Annotation&feature=fig|6666666.640606.peg.557&#39; target=_blank>fig|6666666.640606.peg.557</a>, <a href=&#39;?page=Annotation&feature=fig|6666666.640606.peg.578&#39; target=_blank>fig|6666666.640606.peg.578</a>, <a href=&#39;?page=Annotation&feature=fig|6666666.640606.peg.3462&#39; target=_blank>fig|6666666.640606.peg.3462</a>	yes	<a href=&#39;?page=Annotation&feature=fig|6666666.640605.peg.327&#39; target=_blank>fig|6666666.640605.peg.327</a>, <a href=&#39;?page=Annotation&feature=fig|6666666.640605.peg.2705&#39; target=_blank>fig|6666666.640605.peg.2705</a>, <a href=&#39;?page=Annotation&feature=fig|6666666.640605.peg.3132&#39; target=_blank>fig|6666666.640605.peg.3132</a>	yes
A and B	Clustering-based subsystems	May be related to ADP-phosphoribose and NAD-dependent acetylation	CBSS-216591.1.peg.168	Aspartokinase (EC 2.7.2.4)	<a href=&#39;?page=Annotation&feature=fig|6666666.640606.peg.1734&#39; target=_blank>fig|6666666.640606.peg.1734</a>, <a href=&#39;?page=Annotation&feature=fig|6666666.640606.peg.3497&#39; target=_blank>fig|6666666.640606.peg.3497</a>, <a href=&#39;?page=Annotation&feature=fig|6666666.640606.peg.3507&#39; target=_blank>fig|6666666.640606.peg.3507</a>	yes	<a href=&#39;?page=Annotation&feature=fig|6666666.640605.peg.2008&#39; target=_blank>fig|6666666.640605.peg.2008</a>, <a href=&#39;?page=Annotation&feature=fig|6666666.640605.peg.2021&#39; target=_blank>fig|6666666.640605.peg.2021</a>, <a href=&#39;?page=Annotation&feature=fig|6666666.640605.peg.2105&#39; target=_blank>fig|6666666.640605.peg.2105</a>	yes
A and B	Clustering-based subsystems	May be related to ADP-phosphoribose and NAD-dependent acetylation	CBSS-216591.1.peg.168	Competence protein F homolog, phosphoribosyltransferase domain	<a href=&#39;?page=Annotation&feature=fig|6666666.640606.peg.1876&#39; target=_blank>fig|6666666.640606.peg.1876</a>	yes	<a href=&#39;?page=Annotation&feature=fig|6666666.640605.peg.857&#39; target=_blank>fig|6666666.640605.peg.857</a>	yes
A and B	Clustering-based subsystems	Probably GTP or GMP signaling related	CBSS-176299.4.peg.1292	DNA recombination and repair protein RecO	<a href=&#39;?page=Annotation&feature=fig|6666666.640606.peg.1324&#39; target=_blank>fig|6666666.640606.peg.1324</a>	yes	<a href=&#39;?page=Annotation&feature=fig|6666666.640605.peg.3355&#39; target=_blank>fig|6666666.640605.peg.3355</a>	yes
A and B	Clustering-based subsystems	Probably GTP or GMP signaling related	CBSS-176299.4.peg.1292	DNA-directed RNA polymerase omega subunit (EC 2.7.7.6)	<a href=&#39;?page=Annotation&feature=fig|6666666.640606.peg.1678&#39; target=_blank>fig|6666666.640606.peg.1678</a>	yes	<a href=&#39;?page=Annotation&feature=fig|6666666.640605.peg.3692&#39; target=_blank>fig|6666666.640605.peg.3692</a>	yes
A and B	Clustering-based subsystems	Probably GTP or GMP signaling related	CBSS-176299.4.peg.1292	GTP pyrophosphokinase (EC 2.7.6.5), (p)ppGpp synthetase II	<a href=&#39;?page=Annotation&feature=fig|6666666.640606.peg.3114&#39; target=_blank>fig|6666666.640606.peg.3114</a>	yes	<a href=&#39;?page=Annotation&feature=fig|6666666.640605.peg.1278&#39; target=_blank>fig|6666666.640605.peg.1278</a>	yes
A and B	Clustering-based subsystems	Probably GTP or GMP signaling related	CBSS-176299.4.peg.1292	GTP-binding protein Era	<a href=&#39;?page=Annotation&feature=fig|6666666.640606.peg.1528&#39; target=_blank>fig|6666666.640606.peg.1528</a>	yes	<a href=&#39;?page=Annotation&feature=fig|6666666.640605.peg.3510&#39; target=_blank>fig|6666666.640605.peg.3510</a>	yes
A and B	Clustering-based subsystems	Probably GTP or GMP signaling related	CBSS-176299.4.peg.1292	Guanosine-3&#39;,5&#39;-bis(diphosphate) 3&#39;-pyrophosphohydrolase (EC 3.1.7.2)	<a href=&#39;?page=Annotation&feature=fig|6666666.640606.peg.3114&#39; target=_blank>fig|6666666.640606.peg.3114</a>	yes	<a href=&#39;?page=Annotation&feature=fig|6666666.640605.peg.1278&#39; target=_blank>fig|6666666.640605.peg.1278</a>	yes
A and B	Clustering-based subsystems	Probably GTP or GMP signaling related	CBSS-176299.4.peg.1292	Ribonuclease III (EC 3.1.26.3)	<a href=&#39;?page=Annotation&feature=fig|6666666.640606.peg.484&#39; target=_blank>fig|6666666.640606.peg.484</a>	yes	<a href=&#39;?page=Annotation&feature=fig|6666666.640605.peg.127&#39; target=_blank>fig|6666666.640605.peg.127</a>	yes
A and B	Clustering-based subsystems	Probably GTP or GMP signaling related	CBSS-176299.4.peg.1292	Signal peptidase I (EC 3.4.21.89)	<a href=&#39;?page=Annotation&feature=fig|6666666.640606.peg.3671&#39; target=_blank>fig|6666666.640606.peg.3671</a>	yes	<a href=&#39;?page=Annotation&feature=fig|6666666.640605.peg.3821&#39; target=_blank>fig|6666666.640605.peg.3821</a>	yes
A and B	Clustering-based subsystems	Probably organic hydroperoxide resistance related hypothetical protein	CBSS-269482.1.peg.1294	Homoserine kinase (EC 2.7.1.39)	<a href=&#39;?page=Annotation&feature=fig|6666666.640606.peg.3506&#39; target=_blank>fig|6666666.640606.peg.3506</a>	yes	<a href=&#39;?page=Annotation&feature=fig|6666666.640605.peg.2020&#39; target=_blank>fig|6666666.640605.peg.2020</a>	yes
A and B	Clustering-based subsystems	Probably organic hydroperoxide resistance related hypothetical protein	CBSS-269482.1.peg.1294	Organic hydroperoxide resistance protein	<a href=&#39;?page=Annotation&feature=fig|6666666.640606.peg.1306&#39; target=_blank>fig|6666666.640606.peg.1306</a>	yes	<a href=&#39;?page=Annotation&feature=fig|6666666.640605.peg.2905&#39; target=_blank>fig|6666666.640605.peg.2905</a>	yes
A and B	Clustering-based subsystems	Probably organic hydroperoxide resistance related hypothetical protein	CBSS-269482.1.peg.1294	Organic hydroperoxide resistance transcriptional regulator	<a href=&#39;?page=Annotation&feature=fig|6666666.640606.peg.1305&#39; target=_blank>fig|6666666.640606.peg.1305</a>	yes	<a href=&#39;?page=Annotation&feature=fig|6666666.640605.peg.2906&#39; target=_blank>fig|6666666.640605.peg.2906</a>	yes
A and B	Clustering-based subsystems	Recombination related cluster	CBSS-198094.1.peg.4426	DNA polymerase X family	<a href=&#39;?page=Annotation&feature=fig|6666666.640606.peg.3029&#39; target=_blank>fig|6666666.640606.peg.3029</a>	yes	<a href=&#39;?page=Annotation&feature=fig|6666666.640605.peg.1585&#39; target=_blank>fig|6666666.640605.peg.1585</a>	yes
A and B	Clustering-based subsystems	Recombination related cluster	CBSS-198094.1.peg.4426	Recombination inhibitory protein MutS2	<a href=&#39;?page=Annotation&feature=fig|6666666.640606.peg.2719&#39; target=_blank>fig|6666666.640606.peg.2719</a>	yes	<a href=&#39;?page=Annotation&feature=fig|6666666.640605.peg.3860&#39; target=_blank>fig|6666666.640605.peg.3860</a>	yes
A and B	Clustering-based subsystems	Sulfatases and sulfatase modifying factor 1 (and a hypothetical)	Sulfatases and sulfatase modifying factor 1	Arylsulfatase (EC 3.1.6.1)	<a href=&#39;?page=Annotation&feature=fig|6666666.640606.peg.280&#39; target=_blank>fig|6666666.640606.peg.280</a>, <a href=&#39;?page=Annotation&feature=fig|6666666.640606.peg.1084&#39; target=_blank>fig|6666666.640606.peg.1084</a>, <a href=&#39;?page=Annotation&feature=fig|6666666.640606.peg.1087&#39; target=_blank>fig|6666666.640606.peg.1087</a>, <a href=&#39;?page=Annotation&feature=fig|66666…	yes	<a href=&#39;?page=Annotation&feature=fig|6666666.640605.peg.168&#39; target=_blank>fig|6666666.640605.peg.168</a>, <a href=&#39;?page=Annotation&feature=fig|6666666.640605.peg.1109&#39; target=_blank>fig|6666666.640605.peg.1109</a>, <a href=&#39;?page=Annotation&feature=fig|6666666.640605.peg.1513&#39; target=_blank>fig|6666666.640605.peg.1513</a>, <a href=&#39;?page=Annotation&feature=fig|66666…	yes
A and B	Clustering-based subsystems	Sulfatases and sulfatase modifying factor 1 (and a hypothetical)	Sulfatases and sulfatase modifying factor 1	Sulfatase	<a href=&#39;?page=Annotation&feature=fig|6666666.640606.peg.1012&#39; target=_blank>fig|6666666.640606.peg.1012</a>, <a href=&#39;?page=Annotation&feature=fig|6666666.640606.peg.2134&#39; target=_blank>fig|6666666.640606.peg.2134</a>	yes	<a href=&#39;?page=Annotation&feature=fig|6666666.640605.peg.296&#39; target=_blank>fig|6666666.640605.peg.296</a>, <a href=&#39;?page=Annotation&feature=fig|6666666.640605.peg.1047&#39; target=_blank>fig|6666666.640605.peg.1047</a>, <a href=&#39;?page=Annotation&feature=fig|6666666.640605.peg.1514&#39; target=_blank>fig|6666666.640605.peg.1514</a>, <a href=&#39;?page=Annotation&feature=fig|66666…	yes
A and B	Clustering-based subsystems	Sulfatases and sulfatase modifying factor 1 (and a hypothetical)	Sulfatases and sulfatase modifying factor 1	Sulfatase modifying factor 1 precursor (C-alpha-formyglycine- generating enzyme 1)	<a href=&#39;?page=Annotation&feature=fig|6666666.640606.peg.742&#39; target=_blank>fig|6666666.640606.peg.742</a>	yes	<a href=&#39;?page=Annotation&feature=fig|6666666.640605.peg.2701&#39; target=_blank>fig|6666666.640605.peg.2701</a>	yes
B	Clustering-based subsystems	Translation	CBSS-243265.1.peg.198	Transcription elongation factor GreB	<input type=&#39;button&#39; value=&#39;find&#39; onclick=&#39;window.open("?page=SearchGene&fr=Transcription elongation factor GreB&organism=6666666.640606&subsystem=CBSS-243265.1.peg.198&template_gene=fig|6666666.640605.peg.3745");&#39;>	no	<a href=&#39;?page=Annotation&feature=fig|6666666.640605.peg.3745&#39; target=_blank>fig|6666666.640605.peg.3745</a>	yes
A and B	Clustering-based subsystems	no subcategory	Aerotolerance operon in Bacteroides and potentially orthologous operons in other organisms	MoxR-like ATPase in aerotolerance operon	<a href=&#39;?page=Annotation&feature=fig|6666666.640606.peg.2061&#39; target=_blank>fig|6666666.640606.peg.2061</a>	yes	<a href=&#39;?page=Annotation&feature=fig|6666666.640605.peg.663&#39; target=_blank>fig|6666666.640605.peg.663</a>	yes
A and B	Clustering-based subsystems	no subcategory	Aerotolerance operon in Bacteroides and potentially orthologous operons in other organisms	hypothetical protein PA3071	<a href=&#39;?page=Annotation&feature=fig|6666666.640606.peg.2721&#39; target=_blank>fig|6666666.640606.peg.2721</a>	yes	<a href=&#39;?page=Annotation&feature=fig|6666666.640605.peg.3862&#39; target=_blank>fig|6666666.640605.peg.3862</a>	yes
A and B	Clustering-based subsystems	no subcategory	Butyrate metabolism cluster	3-hydroxyacyl-CoA dehydrogenase (EC 1.1.1.35)	<a href=&#39;?page=Annotation&feature=fig|6666666.640606.peg.2270&#39; target=_blank>fig|6666666.640606.peg.2270</a>	yes	<a href=&#39;?page=Annotation&feature=fig|6666666.640605.peg.1676&#39; target=_blank>fig|6666666.640605.peg.1676</a>	yes
A and B	Clustering-based subsystems	no subcategory	Butyrate metabolism cluster	Acetyl-CoA acetyltransferase (EC 2.3.1.9)	<a href=&#39;?page=Annotation&feature=fig|6666666.640606.peg.629&#39; target=_blank>fig|6666666.640606.peg.629</a>	yes	<a href=&#39;?page=Annotation&feature=fig|6666666.640605.peg.2624&#39; target=_blank>fig|6666666.640605.peg.2624</a>	yes
A and B	Clustering-based subsystems	no subcategory	Butyrate metabolism cluster	Enoyl-CoA hydratase (EC 4.2.1.17)	<a href=&#39;?page=Annotation&feature=fig|6666666.640606.peg.431&#39; target=_blank>fig|6666666.640606.peg.431</a>, <a href=&#39;?page=Annotation&feature=fig|6666666.640606.peg.2902&#39; target=_blank>fig|6666666.640606.peg.2902</a>	yes	<a href=&#39;?page=Annotation&feature=fig|6666666.640605.peg.981&#39; target=_blank>fig|6666666.640605.peg.981</a>, <a href=&#39;?page=Annotation&feature=fig|6666666.640605.peg.1472&#39; target=_blank>fig|6666666.640605.peg.1472</a>	yes
A and B	Clustering-based subsystems	no subcategory	CBSS-1352.1.peg.856	Transcriptional regulator, PadR family	<a href=&#39;?page=Annotation&feature=fig|6666666.640606.peg.179&#39; target=_blank>fig|6666666.640606.peg.179</a>, <a href=&#39;?page=Annotation&feature=fig|6666666.640606.peg.351&#39; target=_blank>fig|6666666.640606.peg.351</a>	yes	<a href=&#39;?page=Annotation&feature=fig|6666666.640605.peg.1214&#39; target=_blank>fig|6666666.640605.peg.1214</a>, <a href=&#39;?page=Annotation&feature=fig|6666666.640605.peg.1484&#39; target=_blank>fig|6666666.640605.peg.1484</a>	yes
A and B	Clustering-based subsystems	no subcategory	CBSS-138119.3.peg.2719	Ribosome-binding factor A	<a href=&#39;?page=Annotation&feature=fig|6666666.640606.peg.2035&#39; target=_blank>fig|6666666.640606.peg.2035</a>	yes	<a href=&#39;?page=Annotation&feature=fig|6666666.640605.peg.718&#39; target=_blank>fig|6666666.640605.peg.718</a>	yes
A and B	Clustering-based subsystems	no subcategory	CBSS-138119.3.peg.2719	Translation initiation factor 2	<a href=&#39;?page=Annotation&feature=fig|6666666.640606.peg.1335&#39; target=_blank>fig|6666666.640606.peg.1335</a>	yes	<a href=&#39;?page=Annotation&feature=fig|6666666.640605.peg.3366&#39; target=_blank>fig|6666666.640605.peg.3366</a>	yes
A and B	Clustering-based subsystems	no subcategory	CBSS-176279.3.peg.868	GTP-binding protein Obg	<a href=&#39;?page=Annotation&feature=fig|6666666.640606.peg.2973&#39; target=_blank>fig|6666666.640606.peg.2973</a>	yes	<a href=&#39;?page=Annotation&feature=fig|6666666.640605.peg.1978&#39; target=_blank>fig|6666666.640605.peg.1978</a>	yes
A and B	Clustering-based subsystems	no subcategory	CBSS-176279.3.peg.868	LSU ribosomal protein L21p	<a href=&#39;?page=Annotation&feature=fig|6666666.640606.peg.3475&#39; target=_blank>fig|6666666.640606.peg.3475</a>	yes	<a href=&#39;?page=Annotation&feature=fig|6666666.640605.peg.3144&#39; target=_blank>fig|6666666.640605.peg.3144</a>	yes
A and B	Clustering-based subsystems	no subcategory	CBSS-176279.3.peg.868	LSU ribosomal protein L27p	<a href=&#39;?page=Annotation&feature=fig|6666666.640606.peg.3474&#39; target=_blank>fig|6666666.640606.peg.3474</a>	yes	<a href=&#39;?page=Annotation&feature=fig|6666666.640605.peg.3143&#39; target=_blank>fig|6666666.640605.peg.3143</a>	yes
A and B	Clustering-based subsystems	no subcategory	CBSS-1806.1.peg.3045	FIG007959: peptidase, M16 family	<a href=&#39;?page=Annotation&feature=fig|6666666.640606.peg.78&#39; target=_blank>fig|6666666.640606.peg.78</a>	yes	<a href=&#39;?page=Annotation&feature=fig|6666666.640605.peg.3074&#39; target=_blank>fig|6666666.640605.peg.3074</a>	yes
A and B	Clustering-based subsystems	no subcategory	CBSS-1806.1.peg.3045	Polyribonucleotide nucleotidyltransferase (EC 2.7.7.8)	<a href=&#39;?page=Annotation&feature=fig|6666666.640606.peg.826&#39; target=_blank>fig|6666666.640606.peg.826</a>	yes	<a href=&#39;?page=Annotation&feature=fig|6666666.640605.peg.1858&#39; target=_blank>fig|6666666.640605.peg.1858</a>	yes
A and B	Clustering-based subsystems	no subcategory	CBSS-211586.9.peg.2560	Acetate permease ActP (cation/acetate symporter)	<a href=&#39;?page=Annotation&feature=fig|6666666.640606.peg.2007&#39; target=_blank>fig|6666666.640606.peg.2007</a>	yes	<a href=&#39;?page=Annotation&feature=fig|6666666.640605.peg.556&#39; target=_blank>fig|6666666.640605.peg.556</a>	yes
A and B	Clustering-based subsystems	no subcategory	CBSS-211586.9.peg.2560	FIG152265: Sodium:solute symporter associated protein	<a href=&#39;?page=Annotation&feature=fig|6666666.640606.peg.2008&#39; target=_blank>fig|6666666.640606.peg.2008</a>	yes	<a href=&#39;?page=Annotation&feature=fig|6666666.640605.peg.555&#39; target=_blank>fig|6666666.640605.peg.555</a>	yes
A and B	Clustering-based subsystems	no subcategory	CBSS-211586.9.peg.2560	Predicted signal-transduction protein containing cAMP-binding and CBS domains	<a href=&#39;?page=Annotation&feature=fig|6666666.640606.peg.2005&#39; target=_blank>fig|6666666.640606.peg.2005</a>, <a href=&#39;?page=Annotation&feature=fig|6666666.640606.peg.2764&#39; target=_blank>fig|6666666.640606.peg.2764</a>	yes	<a href=&#39;?page=Annotation&feature=fig|6666666.640605.peg.558&#39; target=_blank>fig|6666666.640605.peg.558</a>, <a href=&#39;?page=Annotation&feature=fig|6666666.640605.peg.1131&#39; target=_blank>fig|6666666.640605.peg.1131</a>	yes
A and B	Clustering-based subsystems	no subcategory	CBSS-226186.1.peg.4253	DNA recombination and repair protein RecF	<a href=&#39;?page=Annotation&feature=fig|6666666.640606.peg.1738&#39; target=_blank>fig|6666666.640606.peg.1738</a>	yes	<a href=&#39;?page=Annotation&feature=fig|6666666.640605.peg.2109&#39; target=_blank>fig|6666666.640605.peg.2109</a>	yes
A and B	Clustering-based subsystems	no subcategory	CBSS-226186.1.peg.4253	FIG170660: TPR domain protein	<a href=&#39;?page=Annotation&feature=fig|6666666.640606.peg.1736&#39; target=_blank>fig|6666666.640606.peg.1736</a>	yes	<a href=&#39;?page=Annotation&feature=fig|6666666.640605.peg.2107&#39; target=_blank>fig|6666666.640605.peg.2107</a>	yes
A and B	Clustering-based subsystems	no subcategory	CBSS-228410.1.peg.134	DNA polymerase III epsilon subunit (EC 2.7.7.7)	<a href=&#39;?page=Annotation&feature=fig|6666666.640606.peg.452&#39; target=_blank>fig|6666666.640606.peg.452</a>	yes	<a href=&#39;?page=Annotation&feature=fig|6666666.640605.peg.559&#39; target=_blank>fig|6666666.640605.peg.559</a>, <a href=&#39;?page=Annotation&feature=fig|6666666.640605.peg.2556&#39; target=_blank>fig|6666666.640605.peg.2556</a>	yes
A and B	Clustering-based subsystems	no subcategory	CBSS-228410.1.peg.134	Ribonuclease HI (EC 3.1.26.4)	<a href=&#39;?page=Annotation&feature=fig|6666666.640606.peg.1600&#39; target=_blank>fig|6666666.640606.peg.1600</a>	yes	<a href=&#39;?page=Annotation&feature=fig|6666666.640605.peg.3457&#39; target=_blank>fig|6666666.640605.peg.3457</a>	yes
A and B	Clustering-based subsystems	no subcategory	CBSS-266117.6.peg.1260	Phosphopantetheine adenylyltransferase (EC 2.7.7.3)	<a href=&#39;?page=Annotation&feature=fig|6666666.640606.peg.3203&#39; target=_blank>fig|6666666.640606.peg.3203</a>	yes	<a href=&#39;?page=Annotation&feature=fig|6666666.640605.peg.3215&#39; target=_blank>fig|6666666.640605.peg.3215</a>	yes
A and B	Clustering-based subsystems	no subcategory	CBSS-272943.3.peg.1367	DNA topoisomerase I (EC 5.99.1.2)	<a href=&#39;?page=Annotation&feature=fig|6666666.640606.peg.3279&#39; target=_blank>fig|6666666.640606.peg.3279</a>	yes	<a href=&#39;?page=Annotation&feature=fig|6666666.640605.peg.62&#39; target=_blank>fig|6666666.640605.peg.62</a>	yes
A and B	Clustering-based subsystems	no subcategory	CBSS-272943.3.peg.1367	Rossmann fold nucleotide-binding protein Smf possibly involved in DNA uptake	<a href=&#39;?page=Annotation&feature=fig|6666666.640606.peg.620&#39; target=_blank>fig|6666666.640606.peg.620</a>	yes	<a href=&#39;?page=Annotation&feature=fig|6666666.640605.peg.1638&#39; target=_blank>fig|6666666.640605.peg.1638</a>	yes
A and B	Clustering-based subsystems	no subcategory	CBSS-296591.1.peg.2330	Alpha-1,3-N-acetylgalactosamine transferase PglA (EC 2.4.1.-)	<a href=&#39;?page=Annotation&feature=fig|6666666.640606.peg.723&#39; target=_blank>fig|6666666.640606.peg.723</a>	yes	<a href=&#39;?page=Annotation&feature=fig|6666666.640605.peg.2650&#39; target=_blank>fig|6666666.640605.peg.2650</a>	yes
A and B	Clustering-based subsystems	no subcategory	CBSS-296591.1.peg.2330	Lipid carrier : UDP-N-acetylgalactosaminyltransferase (EC 2.4.1.-)	<a href=&#39;?page=Annotation&feature=fig|6666666.640606.peg.445&#39; target=_blank>fig|6666666.640606.peg.445</a>	yes	<a href=&#39;?page=Annotation&feature=fig|6666666.640605.peg.2553&#39; target=_blank>fig|6666666.640605.peg.2553</a>	yes
A and B	Clustering-based subsystems	no subcategory	CBSS-296591.1.peg.2330	NAD-dependent epimerase/dehydratase	<a href=&#39;?page=Annotation&feature=fig|6666666.640606.peg.1585&#39; target=_blank>fig|6666666.640606.peg.1585</a>, <a href=&#39;?page=Annotation&feature=fig|6666666.640606.peg.2299&#39; target=_blank>fig|6666666.640606.peg.2299</a>	yes	<a href=&#39;?page=Annotation&feature=fig|6666666.640605.peg.2159&#39; target=_blank>fig|6666666.640605.peg.2159</a>	yes
A and B	Clustering-based subsystems	no subcategory	CBSS-296591.1.peg.2330	Putative glycosyltransferase	<a href=&#39;?page=Annotation&feature=fig|6666666.640606.peg.1832&#39; target=_blank>fig|6666666.640606.peg.1832</a>	yes	<a href=&#39;?page=Annotation&feature=fig|6666666.640605.peg.2852&#39; target=_blank>fig|6666666.640605.peg.2852</a>	yes
A and B	Clustering-based subsystems	no subcategory	CBSS-296591.1.peg.2330	UDP-glucose 4-epimerase (EC 5.1.3.2)	<a href=&#39;?page=Annotation&feature=fig|6666666.640606.peg.259&#39; target=_blank>fig|6666666.640606.peg.259</a>, <a href=&#39;?page=Annotation&feature=fig|6666666.640606.peg.2555&#39; target=_blank>fig|6666666.640606.peg.2555</a>, <a href=&#39;?page=Annotation&feature=fig|6666666.640606.peg.3265&#39; target=_blank>fig|6666666.640606.peg.3265</a>	yes	<a href=&#39;?page=Annotation&feature=fig|6666666.640605.peg.1389&#39; target=_blank>fig|6666666.640605.peg.1389</a>, <a href=&#39;?page=Annotation&feature=fig|6666666.640605.peg.2359&#39; target=_blank>fig|6666666.640605.peg.2359</a>, <a href=&#39;?page=Annotation&feature=fig|6666666.640605.peg.2537&#39; target=_blank>fig|6666666.640605.peg.2537</a>, <a href=&#39;?page=Annotation&feature=fig|666…	yes
A and B	Clustering-based subsystems	no subcategory	CBSS-296591.1.peg.2330	dTDP-glucose 4,6-dehydratase (EC 4.2.1.46)	<a href=&#39;?page=Annotation&feature=fig|6666666.640606.peg.724&#39; target=_blank>fig|6666666.640606.peg.724</a>, <a href=&#39;?page=Annotation&feature=fig|6666666.640606.peg.725&#39; target=_blank>fig|6666666.640606.peg.725</a>	yes	<a href=&#39;?page=Annotation&feature=fig|6666666.640605.peg.2651&#39; target=_blank>fig|6666666.640605.peg.2651</a>, <a href=&#39;?page=Annotation&feature=fig|6666666.640605.peg.2652&#39; target=_blank>fig|6666666.640605.peg.2652</a>	yes
A and B	Clustering-based subsystems	no subcategory	CBSS-312309.3.peg.1965	Methionine aminopeptidase (EC 3.4.11.18)	<a href=&#39;?page=Annotation&feature=fig|6666666.640606.peg.1649&#39; target=_blank>fig|6666666.640606.peg.1649</a>	yes	<a href=&#39;?page=Annotation&feature=fig|6666666.640605.peg.3663&#39; target=_blank>fig|6666666.640605.peg.3663</a>	yes
A and B	Clustering-based subsystems	no subcategory	CBSS-312309.3.peg.1965	SSU ribosomal protein S2p (SAe)	<a href=&#39;?page=Annotation&feature=fig|6666666.640606.peg.2887&#39; target=_blank>fig|6666666.640606.peg.2887</a>	yes	<a href=&#39;?page=Annotation&feature=fig|6666666.640605.peg.3070&#39; target=_blank>fig|6666666.640605.peg.3070</a>	yes
A and B	Clustering-based subsystems	no subcategory	CBSS-312309.3.peg.1965	Translation elongation factor Ts	<a href=&#39;?page=Annotation&feature=fig|6666666.640606.peg.2888&#39; target=_blank>fig|6666666.640606.peg.2888</a>	yes	<a href=&#39;?page=Annotation&feature=fig|6666666.640605.peg.3071&#39; target=_blank>fig|6666666.640605.peg.3071</a>	yes
A and B	Clustering-based subsystems	no subcategory	CBSS-336982.3.peg.1011	FIG024850: short form Mg-chelase associated protein with vWA domain	<a href=&#39;?page=Annotation&feature=fig|6666666.640606.peg.1957&#39; target=_blank>fig|6666666.640606.peg.1957</a>	yes	<a href=&#39;?page=Annotation&feature=fig|6666666.640605.peg.2864&#39; target=_blank>fig|6666666.640605.peg.2864</a>	yes
A and B	Clustering-based subsystems	no subcategory	CBSS-336982.3.peg.1011	Magnesium chelatase, subunit ChlI (EC 6.6.1.1)	<a href=&#39;?page=Annotation&feature=fig|6666666.640606.peg.1958&#39; target=_blank>fig|6666666.640606.peg.1958</a>	yes	<a href=&#39;?page=Annotation&feature=fig|6666666.640605.peg.2863&#39; target=_blank>fig|6666666.640605.peg.2863</a>	yes
A and B	Clustering-based subsystems	no subcategory	CBSS-56780.10.peg.1536	Metal-dependent hydrolase YbeY, involved in rRNA and/or ribosome maturation and assembly	<a href=&#39;?page=Annotation&feature=fig|6666666.640606.peg.1871&#39; target=_blank>fig|6666666.640606.peg.1871</a>	yes	<a href=&#39;?page=Annotation&feature=fig|6666666.640605.peg.862&#39; target=_blank>fig|6666666.640605.peg.862</a>	yes
A and B	Clustering-based subsystems	no subcategory	CBSS-56780.10.peg.1536	Phosphate starvation-inducible protein PhoH, predicted ATPase	<a href=&#39;?page=Annotation&feature=fig|6666666.640606.peg.2906&#39; target=_blank>fig|6666666.640606.peg.2906</a>, <a href=&#39;?page=Annotation&feature=fig|6666666.640606.peg.2906&#39; target=_blank>fig|6666666.640606.peg.2906</a>	yes	<a href=&#39;?page=Annotation&feature=fig|6666666.640605.peg.977&#39; target=_blank>fig|6666666.640605.peg.977</a>, <a href=&#39;?page=Annotation&feature=fig|6666666.640605.peg.977&#39; target=_blank>fig|6666666.640605.peg.977</a>	yes
A and B	Clustering-based subsystems	no subcategory	DNA gyrase subunits	DNA gyrase subunit A (EC 5.99.1.3)	<a href=&#39;?page=Annotation&feature=fig|6666666.640606.peg.2290&#39; target=_blank>fig|6666666.640606.peg.2290</a>	yes	<a href=&#39;?page=Annotation&feature=fig|6666666.640605.peg.1657&#39; target=_blank>fig|6666666.640605.peg.1657</a>	yes
A and B	Clustering-based subsystems	no subcategory	DNA gyrase subunits	DNA gyrase subunit B (EC 5.99.1.3)	<a href=&#39;?page=Annotation&feature=fig|6666666.640606.peg.516&#39; target=_blank>fig|6666666.640606.peg.516</a>	yes	<a href=&#39;?page=Annotation&feature=fig|6666666.640605.peg.2612&#39; target=_blank>fig|6666666.640605.peg.2612</a>	yes
A and B	Clustering-based subsystems	no subcategory	DNA replication cluster 1	Chromosomal replication initiator protein DnaA	<a href=&#39;?page=Annotation&feature=fig|6666666.640606.peg.3094&#39; target=_blank>fig|6666666.640606.peg.3094</a>	yes	<a href=&#39;?page=Annotation&feature=fig|6666666.640605.peg.1146&#39; target=_blank>fig|6666666.640605.peg.1146</a>	yes
A and B	Clustering-based subsystems	no subcategory	DNA replication cluster 1	DNA gyrase subunit A (EC 5.99.1.3)	<a href=&#39;?page=Annotation&feature=fig|6666666.640606.peg.2290&#39; target=_blank>fig|6666666.640606.peg.2290</a>	yes	<a href=&#39;?page=Annotation&feature=fig|6666666.640605.peg.1657&#39; target=_blank>fig|6666666.640605.peg.1657</a>	yes
A and B	Clustering-based subsystems	no subcategory	DNA replication cluster 1	DNA gyrase subunit B (EC 5.99.1.3)	<a href=&#39;?page=Annotation&feature=fig|6666666.640606.peg.516&#39; target=_blank>fig|6666666.640606.peg.516</a>	yes	<a href=&#39;?page=Annotation&feature=fig|6666666.640605.peg.2612&#39; target=_blank>fig|6666666.640605.peg.2612</a>	yes
A and B	Clustering-based subsystems	no subcategory	DNA replication cluster 1	DNA polymerase III beta subunit (EC 2.7.7.7)	<a href=&#39;?page=Annotation&feature=fig|6666666.640606.peg.991&#39; target=_blank>fig|6666666.640606.peg.991</a>	yes	<a href=&#39;?page=Annotation&feature=fig|6666666.640605.peg.3557&#39; target=_blank>fig|6666666.640605.peg.3557</a>	yes
A and B	Clustering-based subsystems	no subcategory	DNA replication cluster 1	DNA recombination and repair protein RecF	<a href=&#39;?page=Annotation&feature=fig|6666666.640606.peg.1738&#39; target=_blank>fig|6666666.640606.peg.1738</a>	yes	<a href=&#39;?page=Annotation&feature=fig|6666666.640605.peg.2109&#39; target=_blank>fig|6666666.640605.peg.2109</a>	yes
A and B	Clustering-based subsystems	no subcategory	EC699-706	Allophanate hydrolase 2 subunit 1 (EC 3.5.1.54)	<a href=&#39;?page=Annotation&feature=fig|6666666.640606.peg.552&#39; target=_blank>fig|6666666.640606.peg.552</a>	yes	<a href=&#39;?page=Annotation&feature=fig|6666666.640605.peg.2712&#39; target=_blank>fig|6666666.640605.peg.2712</a>	yes
A and B	Clustering-based subsystems	no subcategory	EC699-706	Allophanate hydrolase 2 subunit 2 (EC 3.5.1.54)	<a href=&#39;?page=Annotation&feature=fig|6666666.640606.peg.551&#39; target=_blank>fig|6666666.640606.peg.551</a>	yes	<a href=&#39;?page=Annotation&feature=fig|6666666.640605.peg.2713&#39; target=_blank>fig|6666666.640605.peg.2713</a>	yes
A and B	Clustering-based subsystems	no subcategory	EC699-706	Deoxyribodipyrimidine photolyase (EC 4.1.99.3)	<a href=&#39;?page=Annotation&feature=fig|6666666.640606.peg.358&#39; target=_blank>fig|6666666.640606.peg.358</a>	yes	<a href=&#39;?page=Annotation&feature=fig|6666666.640605.peg.1222&#39; target=_blank>fig|6666666.640605.peg.1222</a>	yes
A and B	Clustering-based subsystems	no subcategory	EC699-706	Lactam utilization protein LamB	<a href=&#39;?page=Annotation&feature=fig|6666666.640606.peg.553&#39; target=_blank>fig|6666666.640606.peg.553</a>	yes	<a href=&#39;?page=Annotation&feature=fig|6666666.640605.peg.2711&#39; target=_blank>fig|6666666.640605.peg.2711</a>	yes
A and B	Clustering-based subsystems	no subcategory	ECSIG4-SIG7	4-hydroxythreonine-4-phosphate dehydrogenase (EC 1.1.1.262)	<a href=&#39;?page=Annotation&feature=fig|6666666.640606.peg.3251&#39; target=_blank>fig|6666666.640606.peg.3251</a>	yes	<a href=&#39;?page=Annotation&feature=fig|6666666.640605.peg.21&#39; target=_blank>fig|6666666.640605.peg.21</a>	yes
A and B	Clustering-based subsystems	no subcategory	ECSIG4-SIG7	Organic solvent tolerance protein precursor	<a href=&#39;?page=Annotation&feature=fig|6666666.640606.peg.2486&#39; target=_blank>fig|6666666.640606.peg.2486</a>	yes	<a href=&#39;?page=Annotation&feature=fig|6666666.640605.peg.315&#39; target=_blank>fig|6666666.640605.peg.315</a>	yes
A and B	Clustering-based subsystems	no subcategory	ECSIG4-SIG7	SSU rRNA (adenine(1518)-N(6)/adenine(1519)-N(6))-dimethyltransferase (EC 2.1.1.182)	<a href=&#39;?page=Annotation&feature=fig|6666666.640606.peg.3252&#39; target=_blank>fig|6666666.640606.peg.3252</a>	yes	<a href=&#39;?page=Annotation&feature=fig|6666666.640605.peg.20&#39; target=_blank>fig|6666666.640605.peg.20</a>	yes
A and B	Clustering-based subsystems	no subcategory	Glycyl-tRNA synthetase containing cluster	DNA recombination and repair protein RecO	<a href=&#39;?page=Annotation&feature=fig|6666666.640606.peg.1324&#39; target=_blank>fig|6666666.640606.peg.1324</a>	yes	<a href=&#39;?page=Annotation&feature=fig|6666666.640605.peg.3355&#39; target=_blank>fig|6666666.640605.peg.3355</a>	yes
A and B	Clustering-based subsystems	no subcategory	Glycyl-tRNA synthetase containing cluster	GTP-binding protein Era	<a href=&#39;?page=Annotation&feature=fig|6666666.640606.peg.1528&#39; target=_blank>fig|6666666.640606.peg.1528</a>	yes	<a href=&#39;?page=Annotation&feature=fig|6666666.640605.peg.3510&#39; target=_blank>fig|6666666.640605.peg.3510</a>	yes
A and B	Clustering-based subsystems	no subcategory	Glycyl-tRNA synthetase containing cluster	Glycyl-tRNA synthetase (EC 6.1.1.14)	<a href=&#39;?page=Annotation&feature=fig|6666666.640606.peg.1805&#39; target=_blank>fig|6666666.640606.peg.1805</a>	yes	<a href=&#39;?page=Annotation&feature=fig|6666666.640605.peg.625&#39; target=_blank>fig|6666666.640605.peg.625</a>	yes
A and B	Clustering-based subsystems	no subcategory	Glycyl-tRNA synthetase containing cluster	Metal-dependent hydrolase YbeY, involved in rRNA and/or ribosome maturation and assembly	<a href=&#39;?page=Annotation&feature=fig|6666666.640606.peg.1871&#39; target=_blank>fig|6666666.640606.peg.1871</a>	yes	<a href=&#39;?page=Annotation&feature=fig|6666666.640605.peg.862&#39; target=_blank>fig|6666666.640605.peg.862</a>	yes
A and B	Clustering-based subsystems	no subcategory	Glycyl-tRNA synthetase containing cluster	Phosphate starvation-inducible protein PhoH, predicted ATPase	<a href=&#39;?page=Annotation&feature=fig|6666666.640606.peg.2906&#39; target=_blank>fig|6666666.640606.peg.2906</a>	yes	<a href=&#39;?page=Annotation&feature=fig|6666666.640605.peg.977&#39; target=_blank>fig|6666666.640605.peg.977</a>	yes
A and B	Clustering-based subsystems	no subcategory	LMPTP YfkJ cluster	Inner membrane protein YihY, formerly thought to be RNase BN	<a href=&#39;?page=Annotation&feature=fig|6666666.640606.peg.3019&#39; target=_blank>fig|6666666.640606.peg.3019</a>	yes	<a href=&#39;?page=Annotation&feature=fig|6666666.640605.peg.1201&#39; target=_blank>fig|6666666.640605.peg.1201</a>	yes
A and B	Clustering-based subsystems	no subcategory	LMPTP YfkJ cluster	Low molecular weight protein tyrosine phosphatase (EC 3.1.3.48)	<a href=&#39;?page=Annotation&feature=fig|6666666.640606.peg.3493&#39; target=_blank>fig|6666666.640606.peg.3493</a>	yes	<a href=&#39;?page=Annotation&feature=fig|6666666.640605.peg.2004&#39; target=_blank>fig|6666666.640605.peg.2004</a>	yes
A and B	Clustering-based subsystems	no subcategory	NusA-TFII Cluster	Ribosome-binding factor A	<a href=&#39;?page=Annotation&feature=fig|6666666.640606.peg.2035&#39; target=_blank>fig|6666666.640606.peg.2035</a>	yes	<a href=&#39;?page=Annotation&feature=fig|6666666.640605.peg.718&#39; target=_blank>fig|6666666.640605.peg.718</a>	yes
A and B	Clustering-based subsystems	no subcategory	NusA-TFII Cluster	Transcription termination protein NusA	<a href=&#39;?page=Annotation&feature=fig|6666666.640606.peg.1334&#39; target=_blank>fig|6666666.640606.peg.1334</a>	yes	<a href=&#39;?page=Annotation&feature=fig|6666666.640605.peg.3365&#39; target=_blank>fig|6666666.640605.peg.3365</a>	yes
A and B	Clustering-based subsystems	no subcategory	NusA-TFII Cluster	Translation initiation factor 2	<a href=&#39;?page=Annotation&feature=fig|6666666.640606.peg.1335&#39; target=_blank>fig|6666666.640606.peg.1335</a>	yes	<a href=&#39;?page=Annotation&feature=fig|6666666.640605.peg.3366&#39; target=_blank>fig|6666666.640605.peg.3366</a>	yes
A and B	Clustering-based subsystems	no subcategory	Purine salvage cluster	Exodeoxyribonuclease VII large subunit (EC 3.1.11.6)	<a href=&#39;?page=Annotation&feature=fig|6666666.640606.peg.3214&#39; target=_blank>fig|6666666.640606.peg.3214</a>	yes	<a href=&#39;?page=Annotation&feature=fig|6666666.640605.peg.455&#39; target=_blank>fig|6666666.640605.peg.455</a>	yes
A and B	Clustering-based subsystems	no subcategory	Purine salvage cluster	GMP synthase [glutamine-hydrolyzing], ATP pyrophosphatase subunit (EC 6.3.5.2)	<a href=&#39;?page=Annotation&feature=fig|6666666.640606.peg.2377&#39; target=_blank>fig|6666666.640606.peg.2377</a>	yes	<a href=&#39;?page=Annotation&feature=fig|6666666.640605.peg.375&#39; target=_blank>fig|6666666.640605.peg.375</a>	yes
A and B	Clustering-based subsystems	no subcategory	Purine salvage cluster	GMP synthase [glutamine-hydrolyzing], amidotransferase subunit (EC 6.3.5.2)	<a href=&#39;?page=Annotation&feature=fig|6666666.640606.peg.2377&#39; target=_blank>fig|6666666.640606.peg.2377</a>	yes	<a href=&#39;?page=Annotation&feature=fig|6666666.640605.peg.375&#39; target=_blank>fig|6666666.640605.peg.375</a>	yes
A and B	Clustering-based subsystems	no subcategory	Purine salvage cluster	Inosine-5&#39;-monophosphate dehydrogenase (EC 1.1.1.205)	<a href=&#39;?page=Annotation&feature=fig|6666666.640606.peg.1761&#39; target=_blank>fig|6666666.640606.peg.1761</a>	yes	<a href=&#39;?page=Annotation&feature=fig|6666666.640605.peg.3519&#39; target=_blank>fig|6666666.640605.peg.3519</a>	yes
A and B	Clustering-based subsystems	no subcategory	Ribosome recycling related cluster	Ribosome recycling factor	<a href=&#39;?page=Annotation&feature=fig|6666666.640606.peg.1610&#39; target=_blank>fig|6666666.640606.peg.1610</a>	yes	<a href=&#39;?page=Annotation&feature=fig|6666666.640605.peg.3624&#39; target=_blank>fig|6666666.640605.peg.3624</a>	yes
A and B	Clustering-based subsystems	no subcategory	Ribosome recycling related cluster	SSU ribosomal protein S2p (SAe)	<a href=&#39;?page=Annotation&feature=fig|6666666.640606.peg.2887&#39; target=_blank>fig|6666666.640606.peg.2887</a>	yes	<a href=&#39;?page=Annotation&feature=fig|6666666.640605.peg.3070&#39; target=_blank>fig|6666666.640605.peg.3070</a>	yes
A and B	Clustering-based subsystems	no subcategory	Ribosome recycling related cluster	Translation elongation factor Ts	<a href=&#39;?page=Annotation&feature=fig|6666666.640606.peg.2888&#39; target=_blank>fig|6666666.640606.peg.2888</a>	yes	<a href=&#39;?page=Annotation&feature=fig|6666666.640605.peg.3071&#39; target=_blank>fig|6666666.640605.peg.3071</a>	yes
A and B	Clustering-based subsystems	no subcategory	Stationary phase repair cluster	2-C-methyl-D-erythritol 2,4-cyclodiphosphate synthase (EC 4.6.1.12)	<a href=&#39;?page=Annotation&feature=fig|6666666.640606.peg.937&#39; target=_blank>fig|6666666.640606.peg.937</a>	yes	<a href=&#39;?page=Annotation&feature=fig|6666666.640605.peg.2070&#39; target=_blank>fig|6666666.640605.peg.2070</a>	yes
A and B	Clustering-based subsystems	no subcategory	Stationary phase repair cluster	2-C-methyl-D-erythritol 4-phosphate cytidylyltransferase (EC 2.7.7.60)	<a href=&#39;?page=Annotation&feature=fig|6666666.640606.peg.2876&#39; target=_blank>fig|6666666.640606.peg.2876</a>	yes	<a href=&#39;?page=Annotation&feature=fig|6666666.640605.peg.3058&#39; target=_blank>fig|6666666.640605.peg.3058</a>	yes
A and B	Clustering-based subsystems	no subcategory	Stationary phase repair cluster	Cell division protein DivIC (FtsB), stabilizes FtsL against RasP cleavage	<a href=&#39;?page=Annotation&feature=fig|6666666.640606.peg.1660&#39; target=_blank>fig|6666666.640606.peg.1660</a>	yes	<a href=&#39;?page=Annotation&feature=fig|6666666.640605.peg.3674&#39; target=_blank>fig|6666666.640605.peg.3674</a>	yes
A and B	Clustering-based subsystems	no subcategory	Stationary phase repair cluster	Cell division protein FtsL	<a href=&#39;?page=Annotation&feature=fig|6666666.640606.peg.969&#39; target=_blank>fig|6666666.640606.peg.969</a>	yes	<a href=&#39;?page=Annotation&feature=fig|6666666.640605.peg.3528&#39; target=_blank>fig|6666666.640605.peg.3528</a>	yes
A and B	Clustering-based subsystems	no subcategory	Stationary phase repair cluster	Protein-L-isoaspartate O-methyltransferase (EC 2.1.1.77)	<a href=&#39;?page=Annotation&feature=fig|6666666.640606.peg.739&#39; target=_blank>fig|6666666.640606.peg.739</a>	yes	<a href=&#39;?page=Annotation&feature=fig|6666666.640605.peg.1391&#39; target=_blank>fig|6666666.640605.peg.1391</a>, <a href=&#39;?page=Annotation&feature=fig|6666666.640605.peg.1731&#39; target=_blank>fig|6666666.640605.peg.1731</a>	yes
B	Clustering-based subsystems	no subcategory	CBSS-296591.1.peg.2330	UDP-N-acetylglucosamine 4,6-dehydratase (EC 4.2.1.-)	<input type=&#39;button&#39; value=&#39;find&#39; onclick=&#39;window.open("?page=SearchGene&fr=UDP-N-acetylglucosamine 4,6-dehydratase (EC 4.2.1.-)&organism=6666666.640606&subsystem=CBSS-296591.1.peg.2330&template_gene=fig|6666666.640605.peg.2365");&#39;>	no	<a href=&#39;?page=Annotation&feature=fig|6666666.640605.peg.2365&#39; target=_blank>fig|6666666.640605.peg.2365</a>	yes
B	Clustering-based subsystems	no subcategory	Cell division-ribosomal stress proteins cluster	Cell division protein FtsH (EC 3.4.24.-)	<input type=&#39;button&#39; value=&#39;find&#39; onclick=&#39;window.open("?page=SearchGene&fr=Cell division protein FtsH (EC 3.4.24.-)&organism=6666666.640606&subsystem=Cell_division-ribosomal_stress_proteins_cluster&template_gene=fig|6666666.640605.peg.736");&#39;>	no	<a href=&#39;?page=Annotation&feature=fig|6666666.640605.peg.736&#39; target=_blank>fig|6666666.640605.peg.736</a>	yes
A and B	Clustering-based subsystems	proteosome related	Cluster-based Subsystem Grouping Hypotheticals - perhaps Proteosome Related	Twin-arginine translocation protein TatA	<a href=&#39;?page=Annotation&feature=fig|6666666.640606.peg.426&#39; target=_blank>fig|6666666.640606.peg.426</a>	yes	<a href=&#39;?page=Annotation&feature=fig|6666666.640605.peg.1467&#39; target=_blank>fig|6666666.640605.peg.1467</a>	yes
A and B	Clustering-based subsystems	proteosome related	Cluster-based Subsystem Grouping Hypotheticals - perhaps Proteosome Related	Twin-arginine translocation protein TatC	<a href=&#39;?page=Annotation&feature=fig|6666666.640606.peg.1996&#39; target=_blank>fig|6666666.640606.peg.1996</a>	yes	<a href=&#39;?page=Annotation&feature=fig|6666666.640605.peg.741&#39; target=_blank>fig|6666666.640605.peg.741</a>	yes
A and B	Cofactors, Vitamins, Prosthetic Groups, Pigments	Biotin	Biotin biosynthesis Experimental	Competence protein F homolog, phosphoribosyltransferase domain	<a href=&#39;?page=Annotation&feature=fig|6666666.640606.peg.1876&#39; target=_blank>fig|6666666.640606.peg.1876</a>	yes	<a href=&#39;?page=Annotation&feature=fig|6666666.640605.peg.857&#39; target=_blank>fig|6666666.640605.peg.857</a>	yes
A and B	Cofactors, Vitamins, Prosthetic Groups, Pigments	Coenzyme A	Coenzyme A Biosynthesis	3-methyl-2-oxobutanoate hydroxymethyltransferase (EC 2.1.2.11)	<a href=&#39;?page=Annotation&feature=fig|6666666.640606.peg.3489&#39; target=_blank>fig|6666666.640606.peg.3489</a>	yes	<a href=&#39;?page=Annotation&feature=fig|6666666.640605.peg.2000&#39; target=_blank>fig|6666666.640605.peg.2000</a>	yes
A and B	Cofactors, Vitamins, Prosthetic Groups, Pigments	Coenzyme A	Coenzyme A Biosynthesis	Aspartate 1-decarboxylase (EC 4.1.1.11)	<a href=&#39;?page=Annotation&feature=fig|6666666.640606.peg.1772&#39; target=_blank>fig|6666666.640606.peg.1772</a>	yes	<a href=&#39;?page=Annotation&feature=fig|6666666.640605.peg.599&#39; target=_blank>fig|6666666.640605.peg.599</a>	yes
A and B	Cofactors, Vitamins, Prosthetic Groups, Pigments	Coenzyme A	Coenzyme A Biosynthesis	Dephospho-CoA kinase (EC 2.7.1.24)	<a href=&#39;?page=Annotation&feature=fig|6666666.640606.peg.1366&#39; target=_blank>fig|6666666.640606.peg.1366</a>	yes	<a href=&#39;?page=Annotation&feature=fig|6666666.640605.peg.3398&#39; target=_blank>fig|6666666.640605.peg.3398</a>	yes
A and B	Cofactors, Vitamins, Prosthetic Groups, Pigments	Coenzyme A	Coenzyme A Biosynthesis	Ketopantoate reductase PanG (EC 1.1.1.169)	<a href=&#39;?page=Annotation&feature=fig|6666666.640606.peg.924&#39; target=_blank>fig|6666666.640606.peg.924</a>	yes	<a href=&#39;?page=Annotation&feature=fig|6666666.640605.peg.2057&#39; target=_blank>fig|6666666.640605.peg.2057</a>	yes
A and B	Cofactors, Vitamins, Prosthetic Groups, Pigments	Coenzyme A	Coenzyme A Biosynthesis	Pantoate--beta-alanine ligase (EC 6.3.2.1)	<a href=&#39;?page=Annotation&feature=fig|6666666.640606.peg.1773&#39; target=_blank>fig|6666666.640606.peg.1773</a>	yes	<a href=&#39;?page=Annotation&feature=fig|6666666.640605.peg.598&#39; target=_blank>fig|6666666.640605.peg.598</a>	yes
A and B	Cofactors, Vitamins, Prosthetic Groups, Pigments	Coenzyme A	Coenzyme A Biosynthesis	Pantothenate kinase type III, CoaX-like (EC 2.7.1.33)	<a href=&#39;?page=Annotation&feature=fig|6666666.640606.peg.1759&#39; target=_blank>fig|6666666.640606.peg.1759</a>, <a href=&#39;?page=Annotation&feature=fig|6666666.640606.peg.1980&#39; target=_blank>fig|6666666.640606.peg.1980</a>	yes	<a href=&#39;?page=Annotation&feature=fig|6666666.640605.peg.756&#39; target=_blank>fig|6666666.640605.peg.756</a>, <a href=&#39;?page=Annotation&feature=fig|6666666.640605.peg.3442&#39; target=_blank>fig|6666666.640605.peg.3442</a>	yes
A and B	Cofactors, Vitamins, Prosthetic Groups, Pigments	Coenzyme A	Coenzyme A Biosynthesis	Phosphopantetheine adenylyltransferase (EC 2.7.7.3)	<a href=&#39;?page=Annotation&feature=fig|6666666.640606.peg.3203&#39; target=_blank>fig|6666666.640606.peg.3203</a>	yes	<a href=&#39;?page=Annotation&feature=fig|6666666.640605.peg.3215&#39; target=_blank>fig|6666666.640605.peg.3215</a>	yes
A and B	Cofactors, Vitamins, Prosthetic Groups, Pigments	Coenzyme A	Coenzyme A Biosynthesis	Phosphopantothenoylcysteine decarboxylase (EC 4.1.1.36)	<a href=&#39;?page=Annotation&feature=fig|6666666.640606.peg.1679&#39; target=_blank>fig|6666666.640606.peg.1679</a>	yes	<a href=&#39;?page=Annotation&feature=fig|6666666.640605.peg.3693&#39; target=_blank>fig|6666666.640605.peg.3693</a>	yes
A and B	Cofactors, Vitamins, Prosthetic Groups, Pigments	Coenzyme A	Coenzyme A Biosynthesis	Phosphopantothenoylcysteine synthetase (EC 6.3.2.5)	<a href=&#39;?page=Annotation&feature=fig|6666666.640606.peg.1679&#39; target=_blank>fig|6666666.640606.peg.1679</a>	yes	<a href=&#39;?page=Annotation&feature=fig|6666666.640605.peg.3693&#39; target=_blank>fig|6666666.640605.peg.3693</a>	yes
A and B	Cofactors, Vitamins, Prosthetic Groups, Pigments	Coenzyme A	Coenzyme A Biosynthesis cluster	3-methyl-2-oxobutanoate hydroxymethyltransferase (EC 2.1.2.11)	<a href=&#39;?page=Annotation&feature=fig|6666666.640606.peg.3489&#39; target=_blank>fig|6666666.640606.peg.3489</a>	yes	<a href=&#39;?page=Annotation&feature=fig|6666666.640605.peg.2000&#39; target=_blank>fig|6666666.640605.peg.2000</a>	yes
A and B	Cofactors, Vitamins, Prosthetic Groups, Pigments	Coenzyme A	Coenzyme A Biosynthesis cluster	Aspartate 1-decarboxylase (EC 4.1.1.11)	<a href=&#39;?page=Annotation&feature=fig|6666666.640606.peg.1772&#39; target=_blank>fig|6666666.640606.peg.1772</a>	yes	<a href=&#39;?page=Annotation&feature=fig|6666666.640605.peg.599&#39; target=_blank>fig|6666666.640605.peg.599</a>	yes
A and B	Cofactors, Vitamins, Prosthetic Groups, Pigments	Coenzyme A	Coenzyme A Biosynthesis cluster	Ketopantoate reductase PanG (EC 1.1.1.169)	<a href=&#39;?page=Annotation&feature=fig|6666666.640606.peg.924&#39; target=_blank>fig|6666666.640606.peg.924</a>	yes	<a href=&#39;?page=Annotation&feature=fig|6666666.640605.peg.2057&#39; target=_blank>fig|6666666.640605.peg.2057</a>	yes
A and B	Cofactors, Vitamins, Prosthetic Groups, Pigments	Coenzyme A	Coenzyme A Biosynthesis cluster	Pantoate--beta-alanine ligase (EC 6.3.2.1)	<a href=&#39;?page=Annotation&feature=fig|6666666.640606.peg.1773&#39; target=_blank>fig|6666666.640606.peg.1773</a>	yes	<a href=&#39;?page=Annotation&feature=fig|6666666.640605.peg.598&#39; target=_blank>fig|6666666.640605.peg.598</a>	yes
A and B	Cofactors, Vitamins, Prosthetic Groups, Pigments	Coenzyme A	Coenzyme A Biosynthesis cluster	Pantothenate kinase type III, CoaX-like (EC 2.7.1.33)	<a href=&#39;?page=Annotation&feature=fig|6666666.640606.peg.1759&#39; target=_blank>fig|6666666.640606.peg.1759</a>, <a href=&#39;?page=Annotation&feature=fig|6666666.640606.peg.1980&#39; target=_blank>fig|6666666.640606.peg.1980</a>	yes	<a href=&#39;?page=Annotation&feature=fig|6666666.640605.peg.756&#39; target=_blank>fig|6666666.640605.peg.756</a>, <a href=&#39;?page=Annotation&feature=fig|6666666.640605.peg.3442&#39; target=_blank>fig|6666666.640605.peg.3442</a>	yes
A and B	Cofactors, Vitamins, Prosthetic Groups, Pigments	Folate and pterines	5-FCL-like protein	5,10-methylenetetrahydrofolate reductase (EC 1.5.1.20)	<a href=&#39;?page=Annotation&feature=fig|6666666.640606.peg.614&#39; target=_blank>fig|6666666.640606.peg.614</a>	yes	<a href=&#39;?page=Annotation&feature=fig|6666666.640605.peg.1632&#39; target=_blank>fig|6666666.640605.peg.1632</a>	yes
A and B	Cofactors, Vitamins, Prosthetic Groups, Pigments	Folate and pterines	5-FCL-like protein	5-formyltetrahydrofolate cyclo-ligase (EC 6.3.3.2)	<a href=&#39;?page=Annotation&feature=fig|6666666.640606.peg.934&#39; target=_blank>fig|6666666.640606.peg.934</a>	yes	<a href=&#39;?page=Annotation&feature=fig|6666666.640605.peg.2067&#39; target=_blank>fig|6666666.640605.peg.2067</a>	yes
A and B	Cofactors, Vitamins, Prosthetic Groups, Pigments	Folate and pterines	5-FCL-like protein	Alcohol dehydrogenase (EC 1.1.1.1)	<a href=&#39;?page=Annotation&feature=fig|6666666.640606.peg.759&#39; target=_blank>fig|6666666.640606.peg.759</a>, <a href=&#39;?page=Annotation&feature=fig|6666666.640606.peg.2021&#39; target=_blank>fig|6666666.640606.peg.2021</a>, <a href=&#39;?page=Annotation&feature=fig|6666666.640606.peg.2464&#39; target=_blank>fig|6666666.640606.peg.2464</a>	yes	<a href=&#39;?page=Annotation&feature=fig|6666666.640605.peg.1402&#39; target=_blank>fig|6666666.640605.peg.1402</a>, <a href=&#39;?page=Annotation&feature=fig|6666666.640605.peg.2683&#39; target=_blank>fig|6666666.640605.peg.2683</a>	yes
A and B	Cofactors, Vitamins, Prosthetic Groups, Pigments	Folate and pterines	5-FCL-like protein	Butyryl-CoA dehydrogenase (EC 1.3.8.1)	<a href=&#39;?page=Annotation&feature=fig|6666666.640606.peg.1580&#39; target=_blank>fig|6666666.640606.peg.1580</a>, <a href=&#39;?page=Annotation&feature=fig|6666666.640606.peg.1769&#39; target=_blank>fig|6666666.640606.peg.1769</a>	yes	<a href=&#39;?page=Annotation&feature=fig|6666666.640605.peg.602&#39; target=_blank>fig|6666666.640605.peg.602</a>, <a href=&#39;?page=Annotation&feature=fig|6666666.640605.peg.3473&#39; target=_blank>fig|6666666.640605.peg.3473</a>	yes
A and B	Cofactors, Vitamins, Prosthetic Groups, Pigments	Folate and pterines	5-FCL-like protein	Dihydrofolate reductase (EC 1.5.1.3)	<a href=&#39;?page=Annotation&feature=fig|6666666.640606.peg.691&#39; target=_blank>fig|6666666.640606.peg.691</a>	yes	<a href=&#39;?page=Annotation&feature=fig|6666666.640605.peg.50&#39; target=_blank>fig|6666666.640605.peg.50</a>	yes
A and B	Cofactors, Vitamins, Prosthetic Groups, Pigments	Folate and pterines	5-FCL-like protein	Dihydrolipoamide acetyltransferase component of pyruvate dehydrogenase complex (EC 2.3.1.12)	<a href=&#39;?page=Annotation&feature=fig|6666666.640606.peg.3293&#39; target=_blank>fig|6666666.640606.peg.3293</a>	yes	<a href=&#39;?page=Annotation&feature=fig|6666666.640605.peg.157&#39; target=_blank>fig|6666666.640605.peg.157</a>	yes
A and B	Cofactors, Vitamins, Prosthetic Groups, Pigments	Folate and pterines	5-FCL-like protein	Dihydrolipoamide dehydrogenase (EC 1.8.1.4)	<a href=&#39;?page=Annotation&feature=fig|6666666.640606.peg.3411&#39; target=_blank>fig|6666666.640606.peg.3411</a>	yes	<a href=&#39;?page=Annotation&feature=fig|6666666.640605.peg.944&#39; target=_blank>fig|6666666.640605.peg.944</a>	yes
A and B	Cofactors, Vitamins, Prosthetic Groups, Pigments	Folate and pterines	5-FCL-like protein	Formyltetrahydrofolate deformylase (EC 3.5.1.10)	<a href=&#39;?page=Annotation&feature=fig|6666666.640606.peg.1971&#39; target=_blank>fig|6666666.640606.peg.1971</a>	yes	<a href=&#39;?page=Annotation&feature=fig|6666666.640605.peg.765&#39; target=_blank>fig|6666666.640605.peg.765</a>	yes
A and B	Cofactors, Vitamins, Prosthetic Groups, Pigments	Folate and pterines	5-FCL-like protein	Isocitrate dehydrogenase [NADP] (EC 1.1.1.42)	<a href=&#39;?page=Annotation&feature=fig|6666666.640606.peg.432&#39; target=_blank>fig|6666666.640606.peg.432</a>, <a href=&#39;?page=Annotation&feature=fig|6666666.640606.peg.3447&#39; target=_blank>fig|6666666.640606.peg.3447</a>	yes	<a href=&#39;?page=Annotation&feature=fig|6666666.640605.peg.1474&#39; target=_blank>fig|6666666.640605.peg.1474</a>, <a href=&#39;?page=Annotation&feature=fig|6666666.640605.peg.3091&#39; target=_blank>fig|6666666.640605.peg.3091</a>	yes
A and B	Cofactors, Vitamins, Prosthetic Groups, Pigments	Folate and pterines	5-FCL-like protein	Methylenetetrahydrofolate dehydrogenase (NADP+) (EC 1.5.1.5)	<a href=&#39;?page=Annotation&feature=fig|6666666.640606.peg.2694&#39; target=_blank>fig|6666666.640606.peg.2694</a>	yes	<a href=&#39;?page=Annotation&feature=fig|6666666.640605.peg.420&#39; target=_blank>fig|6666666.640605.peg.420</a>	yes
A and B	Cofactors, Vitamins, Prosthetic Groups, Pigments	Folate and pterines	5-FCL-like protein	Phosphoribosylaminoimidazolecarboxamide formyltransferase (EC 2.1.2.3)	<a href=&#39;?page=Annotation&feature=fig|6666666.640606.peg.167&#39; target=_blank>fig|6666666.640606.peg.167</a>	yes	<a href=&#39;?page=Annotation&feature=fig|6666666.640605.peg.1124&#39; target=_blank>fig|6666666.640605.peg.1124</a>	yes
A and B	Cofactors, Vitamins, Prosthetic Groups, Pigments	Folate and pterines	5-FCL-like protein	Phosphoribosylglycinamide formyltransferase (EC 2.1.2.2)	<a href=&#39;?page=Annotation&feature=fig|6666666.640606.peg.170&#39; target=_blank>fig|6666666.640606.peg.170</a>	yes	<a href=&#39;?page=Annotation&feature=fig|6666666.640605.peg.1128&#39; target=_blank>fig|6666666.640605.peg.1128</a>	yes
A and B	Cofactors, Vitamins, Prosthetic Groups, Pigments	Folate and pterines	5-FCL-like protein	Serine hydroxymethyltransferase (EC 2.1.2.1)	<a href=&#39;?page=Annotation&feature=fig|6666666.640606.peg.1995&#39; target=_blank>fig|6666666.640606.peg.1995</a>	yes	<a href=&#39;?page=Annotation&feature=fig|6666666.640605.peg.742&#39; target=_blank>fig|6666666.640605.peg.742</a>	yes
A and B	Cofactors, Vitamins, Prosthetic Groups, Pigments	Folate and pterines	5-FCL-like protein	Thiamine-monophosphate kinase (EC 2.7.4.16)	<a href=&#39;?page=Annotation&feature=fig|6666666.640606.peg.2455&#39; target=_blank>fig|6666666.640606.peg.2455</a>	yes	<a href=&#39;?page=Annotation&feature=fig|6666666.640605.peg.295&#39; target=_blank>fig|6666666.640605.peg.295</a>	yes
A and B	Cofactors, Vitamins, Prosthetic Groups, Pigments	Folate and pterines	Folate Biosynthesis	2-amino-4-hydroxy-6-hydroxymethyldihydropteridine pyrophosphokinase (EC 2.7.6.3)	<a href=&#39;?page=Annotation&feature=fig|6666666.640606.peg.83&#39; target=_blank>fig|6666666.640606.peg.83</a>	yes	<a href=&#39;?page=Annotation&feature=fig|6666666.640605.peg.992&#39; target=_blank>fig|6666666.640605.peg.992</a>	yes
A and B	Cofactors, Vitamins, Prosthetic Groups, Pigments	Folate and pterines	Folate Biosynthesis	5-formyltetrahydrofolate cyclo-ligase (EC 6.3.3.2)	<a href=&#39;?page=Annotation&feature=fig|6666666.640606.peg.934&#39; target=_blank>fig|6666666.640606.peg.934</a>	yes	<a href=&#39;?page=Annotation&feature=fig|6666666.640605.peg.2067&#39; target=_blank>fig|6666666.640605.peg.2067</a>	yes
A and B	Cofactors, Vitamins, Prosthetic Groups, Pigments	Folate and pterines	Folate Biosynthesis	Dihydrofolate reductase (EC 1.5.1.3)	<a href=&#39;?page=Annotation&feature=fig|6666666.640606.peg.691&#39; target=_blank>fig|6666666.640606.peg.691</a>	yes	<a href=&#39;?page=Annotation&feature=fig|6666666.640605.peg.50&#39; target=_blank>fig|6666666.640605.peg.50</a>	yes
A and B	Cofactors, Vitamins, Prosthetic Groups, Pigments	Folate and pterines	Folate Biosynthesis	Dihydrofolate synthase (EC 6.3.2.12)	<a href=&#39;?page=Annotation&feature=fig|6666666.640606.peg.2273&#39; target=_blank>fig|6666666.640606.peg.2273</a>	yes	<a href=&#39;?page=Annotation&feature=fig|6666666.640605.peg.1673&#39; target=_blank>fig|6666666.640605.peg.1673</a>	yes
A and B	Cofactors, Vitamins, Prosthetic Groups, Pigments	Folate and pterines	Folate Biosynthesis	Dihydroneopterin aldolase (EC 4.1.2.25)	<a href=&#39;?page=Annotation&feature=fig|6666666.640606.peg.2476&#39; target=_blank>fig|6666666.640606.peg.2476</a>	yes	<a href=&#39;?page=Annotation&feature=fig|6666666.640605.peg.306&#39; target=_blank>fig|6666666.640605.peg.306</a>	yes
A and B	Cofactors, Vitamins, Prosthetic Groups, Pigments	Folate and pterines	Folate Biosynthesis	Dihydropteroate synthase (EC 2.5.1.15)	<a href=&#39;?page=Annotation&feature=fig|6666666.640606.peg.2368&#39; target=_blank>fig|6666666.640606.peg.2368</a>	yes	<a href=&#39;?page=Annotation&feature=fig|6666666.640605.peg.365&#39; target=_blank>fig|6666666.640605.peg.365</a>	yes
A and B	Cofactors, Vitamins, Prosthetic Groups, Pigments	Folate and pterines	Folate Biosynthesis	Folylpolyglutamate synthase (EC 6.3.2.17)	<a href=&#39;?page=Annotation&feature=fig|6666666.640606.peg.2273&#39; target=_blank>fig|6666666.640606.peg.2273</a>	yes	<a href=&#39;?page=Annotation&feature=fig|6666666.640605.peg.1673&#39; target=_blank>fig|6666666.640605.peg.1673</a>	yes
A and B	Cofactors, Vitamins, Prosthetic Groups, Pigments	Folate and pterines	Folate Biosynthesis	GTP cyclohydrolase I (EC 3.5.4.16) type 1	<a href=&#39;?page=Annotation&feature=fig|6666666.640606.peg.2384&#39; target=_blank>fig|6666666.640606.peg.2384</a>	yes	<a href=&#39;?page=Annotation&feature=fig|6666666.640605.peg.380&#39; target=_blank>fig|6666666.640605.peg.380</a>	yes
A and B	Cofactors, Vitamins, Prosthetic Groups, Pigments	Folate and pterines	Folate Biosynthesis	Para-aminobenzoate synthase, amidotransferase component (EC 2.6.1.85)	<a href=&#39;?page=Annotation&feature=fig|6666666.640606.peg.2805&#39; target=_blank>fig|6666666.640606.peg.2805</a>	yes	<a href=&#39;?page=Annotation&feature=fig|6666666.640605.peg.1232&#39; target=_blank>fig|6666666.640605.peg.1232</a>	yes
A and B	Cofactors, Vitamins, Prosthetic Groups, Pigments	Folate and pterines	Folate Biosynthesis	Para-aminobenzoate synthase, aminase component (EC 2.6.1.85)	<a href=&#39;?page=Annotation&feature=fig|6666666.640606.peg.3192&#39; target=_blank>fig|6666666.640606.peg.3192</a>	yes	<a href=&#39;?page=Annotation&feature=fig|6666666.640605.peg.3204&#39; target=_blank>fig|6666666.640605.peg.3204</a>	yes
A and B	Cofactors, Vitamins, Prosthetic Groups, Pigments	Folate and pterines	Folate Biosynthesis	Thymidylate synthase (EC 2.1.1.45)	<a href=&#39;?page=Annotation&feature=fig|6666666.640606.peg.2599&#39; target=_blank>fig|6666666.640606.peg.2599</a>	yes	<a href=&#39;?page=Annotation&feature=fig|6666666.640605.peg.2307&#39; target=_blank>fig|6666666.640605.peg.2307</a>	yes
A and B	Cofactors, Vitamins, Prosthetic Groups, Pigments	Folate and pterines	Folate biosynthesis cluster	2-amino-4-hydroxy-6-hydroxymethyldihydropteridine pyrophosphokinase (EC 2.7.6.3)	<a href=&#39;?page=Annotation&feature=fig|6666666.640606.peg.83&#39; target=_blank>fig|6666666.640606.peg.83</a>	yes	<a href=&#39;?page=Annotation&feature=fig|6666666.640605.peg.992&#39; target=_blank>fig|6666666.640605.peg.992</a>	yes
A and B	Cofactors, Vitamins, Prosthetic Groups, Pigments	Folate and pterines	Folate biosynthesis cluster	Aspartate 1-decarboxylase (EC 4.1.1.11)	<a href=&#39;?page=Annotation&feature=fig|6666666.640606.peg.1772&#39; target=_blank>fig|6666666.640606.peg.1772</a>	yes	<a href=&#39;?page=Annotation&feature=fig|6666666.640605.peg.599&#39; target=_blank>fig|6666666.640605.peg.599</a>	yes
A and B	Cofactors, Vitamins, Prosthetic Groups, Pigments	Folate and pterines	Folate biosynthesis cluster	Dihydroneopterin aldolase (EC 4.1.2.25)	<a href=&#39;?page=Annotation&feature=fig|6666666.640606.peg.2476&#39; target=_blank>fig|6666666.640606.peg.2476</a>	yes	<a href=&#39;?page=Annotation&feature=fig|6666666.640605.peg.306&#39; target=_blank>fig|6666666.640605.peg.306</a>	yes
A and B	Cofactors, Vitamins, Prosthetic Groups, Pigments	Folate and pterines	Folate biosynthesis cluster	Dihydropteroate synthase (EC 2.5.1.15)	<a href=&#39;?page=Annotation&feature=fig|6666666.640606.peg.2368&#39; target=_blank>fig|6666666.640606.peg.2368</a>	yes	<a href=&#39;?page=Annotation&feature=fig|6666666.640605.peg.365&#39; target=_blank>fig|6666666.640605.peg.365</a>	yes
A and B	Cofactors, Vitamins, Prosthetic Groups, Pigments	Folate and pterines	Folate biosynthesis cluster	GTP cyclohydrolase I (EC 3.5.4.16) type 1	<a href=&#39;?page=Annotation&feature=fig|6666666.640606.peg.2384&#39; target=_blank>fig|6666666.640606.peg.2384</a>	yes	<a href=&#39;?page=Annotation&feature=fig|6666666.640605.peg.380&#39; target=_blank>fig|6666666.640605.peg.380</a>	yes
A and B	Cofactors, Vitamins, Prosthetic Groups, Pigments	Folate and pterines	Folate biosynthesis cluster	Hypoxanthine-guanine phosphoribosyltransferase (EC 2.4.2.8)	<a href=&#39;?page=Annotation&feature=fig|6666666.640606.peg.2975&#39; target=_blank>fig|6666666.640606.peg.2975</a>	yes	<a href=&#39;?page=Annotation&feature=fig|6666666.640605.peg.1980&#39; target=_blank>fig|6666666.640605.peg.1980</a>	yes
A and B	Cofactors, Vitamins, Prosthetic Groups, Pigments	Folate and pterines	Folate biosynthesis cluster	Ketopantoate reductase PanG (EC 1.1.1.169)	<a href=&#39;?page=Annotation&feature=fig|6666666.640606.peg.924&#39; target=_blank>fig|6666666.640606.peg.924</a>	yes	<a href=&#39;?page=Annotation&feature=fig|6666666.640605.peg.2057&#39; target=_blank>fig|6666666.640605.peg.2057</a>	yes
A and B	Cofactors, Vitamins, Prosthetic Groups, Pigments	Folate and pterines	Folate biosynthesis cluster	Pantoate--beta-alanine ligase (EC 6.3.2.1)	<a href=&#39;?page=Annotation&feature=fig|6666666.640606.peg.1773&#39; target=_blank>fig|6666666.640606.peg.1773</a>	yes	<a href=&#39;?page=Annotation&feature=fig|6666666.640605.peg.598&#39; target=_blank>fig|6666666.640605.peg.598</a>	yes
A and B	Cofactors, Vitamins, Prosthetic Groups, Pigments	Folate and pterines	Folate biosynthesis cluster	tRNA(Ile)-lysidine synthetase (EC 6.3.4.19)	<a href=&#39;?page=Annotation&feature=fig|6666666.640606.peg.1674&#39; target=_blank>fig|6666666.640606.peg.1674</a>	yes	<a href=&#39;?page=Annotation&feature=fig|6666666.640605.peg.3688&#39; target=_blank>fig|6666666.640605.peg.3688</a>	yes
A and B	Cofactors, Vitamins, Prosthetic Groups, Pigments	Folate and pterines	Pterin carbinolamine dehydratase	4-hydroxyphenylpyruvate dioxygenase (EC 1.13.11.27)	<a href=&#39;?page=Annotation&feature=fig|6666666.640606.peg.2194&#39; target=_blank>fig|6666666.640606.peg.2194</a>	yes	<a href=&#39;?page=Annotation&feature=fig|6666666.640605.peg.1710&#39; target=_blank>fig|6666666.640605.peg.1710</a>	yes
A and B	Cofactors, Vitamins, Prosthetic Groups, Pigments	Folate and pterines	Pterin carbinolamine dehydratase	Fumarylacetoacetase (EC 3.7.1.2)	<a href=&#39;?page=Annotation&feature=fig|6666666.640606.peg.2681&#39; target=_blank>fig|6666666.640606.peg.2681</a>	yes	<a href=&#39;?page=Annotation&feature=fig|6666666.640605.peg.3798&#39; target=_blank>fig|6666666.640605.peg.3798</a>	yes
A and B	Cofactors, Vitamins, Prosthetic Groups, Pigments	Folate and pterines	Pterin carbinolamine dehydratase	Fumarylacetoacetate hydrolase family protein	<a href=&#39;?page=Annotation&feature=fig|6666666.640606.peg.1900&#39; target=_blank>fig|6666666.640606.peg.1900</a>, <a href=&#39;?page=Annotation&feature=fig|6666666.640606.peg.2439&#39; target=_blank>fig|6666666.640606.peg.2439</a>	yes	<a href=&#39;?page=Annotation&feature=fig|6666666.640605.peg.802&#39; target=_blank>fig|6666666.640605.peg.802</a>, <a href=&#39;?page=Annotation&feature=fig|6666666.640605.peg.2786&#39; target=_blank>fig|6666666.640605.peg.2786</a>	yes
A and B	Cofactors, Vitamins, Prosthetic Groups, Pigments	Folate and pterines	Pterin carbinolamine dehydratase	Homogentisate 1,2-dioxygenase (EC 1.13.11.5)	<a href=&#39;?page=Annotation&feature=fig|6666666.640606.peg.3424&#39; target=_blank>fig|6666666.640606.peg.3424</a>	yes	<a href=&#39;?page=Annotation&feature=fig|6666666.640605.peg.3110&#39; target=_blank>fig|6666666.640605.peg.3110</a>	yes
A and B	Cofactors, Vitamins, Prosthetic Groups, Pigments	Folate and pterines	Pterin carbinolamine dehydratase	Phenylalanine-4-hydroxylase (EC 1.14.16.1)	<a href=&#39;?page=Annotation&feature=fig|6666666.640606.peg.2798&#39; target=_blank>fig|6666666.640606.peg.2798</a>	yes	<a href=&#39;?page=Annotation&feature=fig|6666666.640605.peg.1240&#39; target=_blank>fig|6666666.640605.peg.1240</a>	yes
A and B	Cofactors, Vitamins, Prosthetic Groups, Pigments	Folate and pterines	Pterin carbinolamine dehydratase	Pterin-4-alpha-carbinolamine dehydratase (EC 4.2.1.96)	<a href=&#39;?page=Annotation&feature=fig|6666666.640606.peg.1988&#39; target=_blank>fig|6666666.640606.peg.1988</a>	yes	<a href=&#39;?page=Annotation&feature=fig|6666666.640605.peg.748&#39; target=_blank>fig|6666666.640605.peg.748</a>	yes
A and B	Cofactors, Vitamins, Prosthetic Groups, Pigments	Folate and pterines	Pterin metabolism	6-pyruvoyl tetrahydrobiopterin synthase (EC 4.2.3.12)	<a href=&#39;?page=Annotation&feature=fig|6666666.640606.peg.245&#39; target=_blank>fig|6666666.640606.peg.245</a>, <a href=&#39;?page=Annotation&feature=fig|6666666.640606.peg.2385&#39; target=_blank>fig|6666666.640606.peg.2385</a>	yes	<a href=&#39;?page=Annotation&feature=fig|6666666.640605.peg.381&#39; target=_blank>fig|6666666.640605.peg.381</a>, <a href=&#39;?page=Annotation&feature=fig|6666666.640605.peg.1272&#39; target=_blank>fig|6666666.640605.peg.1272</a>	yes
A and B	Cofactors, Vitamins, Prosthetic Groups, Pigments	Folate and pterines	Pterin metabolism	GTP cyclohydrolase I (EC 3.5.4.16) type 1	<a href=&#39;?page=Annotation&feature=fig|6666666.640606.peg.2384&#39; target=_blank>fig|6666666.640606.peg.2384</a>	yes	<a href=&#39;?page=Annotation&feature=fig|6666666.640605.peg.380&#39; target=_blank>fig|6666666.640605.peg.380</a>	yes
A and B	Cofactors, Vitamins, Prosthetic Groups, Pigments	Folate and pterines	Pterin metabolism	Phenylalanine-4-hydroxylase (EC 1.14.16.1)	<a href=&#39;?page=Annotation&feature=fig|6666666.640606.peg.2798&#39; target=_blank>fig|6666666.640606.peg.2798</a>	yes	<a href=&#39;?page=Annotation&feature=fig|6666666.640605.peg.1240&#39; target=_blank>fig|6666666.640605.peg.1240</a>	yes
A and B	Cofactors, Vitamins, Prosthetic Groups, Pigments	Folate and pterines	Pterin metabolism	Pterin-4-alpha-carbinolamine dehydratase (EC 4.2.1.96)	<a href=&#39;?page=Annotation&feature=fig|6666666.640606.peg.1988&#39; target=_blank>fig|6666666.640606.peg.1988</a>	yes	<a href=&#39;?page=Annotation&feature=fig|6666666.640605.peg.748&#39; target=_blank>fig|6666666.640605.peg.748</a>	yes
A and B	Cofactors, Vitamins, Prosthetic Groups, Pigments	Folate and pterines	Pterin synthesis related cluster	6-pyruvoyl tetrahydrobiopterin synthase (EC 4.2.3.12)	<a href=&#39;?page=Annotation&feature=fig|6666666.640606.peg.245&#39; target=_blank>fig|6666666.640606.peg.245</a>, <a href=&#39;?page=Annotation&feature=fig|6666666.640606.peg.2385&#39; target=_blank>fig|6666666.640606.peg.2385</a>	yes	<a href=&#39;?page=Annotation&feature=fig|6666666.640605.peg.381&#39; target=_blank>fig|6666666.640605.peg.381</a>, <a href=&#39;?page=Annotation&feature=fig|6666666.640605.peg.1272&#39; target=_blank>fig|6666666.640605.peg.1272</a>	yes
A and B	Cofactors, Vitamins, Prosthetic Groups, Pigments	Folate and pterines	Pterin synthesis related cluster	Acetyl-coenzyme A carboxyl transferase alpha chain (EC 6.4.1.2)	<a href=&#39;?page=Annotation&feature=fig|6666666.640606.peg.3623&#39; target=_blank>fig|6666666.640606.peg.3623</a>	yes	<a href=&#39;?page=Annotation&feature=fig|6666666.640605.peg.1614&#39; target=_blank>fig|6666666.640605.peg.1614</a>	yes
A and B	Cofactors, Vitamins, Prosthetic Groups, Pigments	Folate and pterines	Pterin synthesis related cluster	Alkaline phosphatase (EC 3.1.3.1)	<a href=&#39;?page=Annotation&feature=fig|6666666.640606.peg.2262&#39; target=_blank>fig|6666666.640606.peg.2262</a>, <a href=&#39;?page=Annotation&feature=fig|6666666.640606.peg.3422&#39; target=_blank>fig|6666666.640606.peg.3422</a>	yes	<a href=&#39;?page=Annotation&feature=fig|6666666.640605.peg.13&#39; target=_blank>fig|6666666.640605.peg.13</a>, <a href=&#39;?page=Annotation&feature=fig|6666666.640605.peg.3111&#39; target=_blank>fig|6666666.640605.peg.3111</a>	yes
A and B	Cofactors, Vitamins, Prosthetic Groups, Pigments	Folate and pterines	Pterin synthesis related cluster	GTP cyclohydrolase I (EC 3.5.4.16) type 1	<a href=&#39;?page=Annotation&feature=fig|6666666.640606.peg.2384&#39; target=_blank>fig|6666666.640606.peg.2384</a>	yes	<a href=&#39;?page=Annotation&feature=fig|6666666.640605.peg.380&#39; target=_blank>fig|6666666.640605.peg.380</a>	yes
A and B	Cofactors, Vitamins, Prosthetic Groups, Pigments	Folate and pterines	Pterin synthesis related cluster	Phosphoribosylanthranilate isomerase (EC 5.3.1.24)	<a href=&#39;?page=Annotation&feature=fig|6666666.640606.peg.2297&#39; target=_blank>fig|6666666.640606.peg.2297</a>, <a href=&#39;?page=Annotation&feature=fig|6666666.640606.peg.2802&#39; target=_blank>fig|6666666.640606.peg.2802</a>	yes	<a href=&#39;?page=Annotation&feature=fig|6666666.640605.peg.1235&#39; target=_blank>fig|6666666.640605.peg.1235</a>	yes
A and B	Cofactors, Vitamins, Prosthetic Groups, Pigments	NAD and NADP	NAD and NADP cofactor biosynthesis global	3-hydroxyanthranilate 3,4-dioxygenase (EC 1.13.11.6)	<a href=&#39;?page=Annotation&feature=fig|6666666.640606.peg.1853&#39; target=_blank>fig|6666666.640606.peg.1853</a>	yes	<a href=&#39;?page=Annotation&feature=fig|6666666.640605.peg.549&#39; target=_blank>fig|6666666.640605.peg.549</a>	yes
A and B	Cofactors, Vitamins, Prosthetic Groups, Pigments	NAD and NADP	NAD and NADP cofactor biosynthesis global	ADP-ribose pyrophosphatase (EC 3.6.1.13)	<a href=&#39;?page=Annotation&feature=fig|6666666.640606.peg.657&#39; target=_blank>fig|6666666.640606.peg.657</a>	yes	<a href=&#39;?page=Annotation&feature=fig|6666666.640605.peg.2584&#39; target=_blank>fig|6666666.640605.peg.2584</a>	yes
A and B	Cofactors, Vitamins, Prosthetic Groups, Pigments	NAD and NADP	NAD and NADP cofactor biosynthesis global	Glutamine amidotransferase chain of NAD synthetase	<a href=&#39;?page=Annotation&feature=fig|6666666.640606.peg.483&#39; target=_blank>fig|6666666.640606.peg.483</a>	yes	<a href=&#39;?page=Annotation&feature=fig|6666666.640605.peg.128&#39; target=_blank>fig|6666666.640605.peg.128</a>	yes
A and B	Cofactors, Vitamins, Prosthetic Groups, Pigments	NAD and NADP	NAD and NADP cofactor biosynthesis global	Kynureninase (EC 3.7.1.3)	<a href=&#39;?page=Annotation&feature=fig|6666666.640606.peg.1852&#39; target=_blank>fig|6666666.640606.peg.1852</a>	yes	<a href=&#39;?page=Annotation&feature=fig|6666666.640605.peg.550&#39; target=_blank>fig|6666666.640605.peg.550</a>	yes
A and B	Cofactors, Vitamins, Prosthetic Groups, Pigments	NAD and NADP	NAD and NADP cofactor biosynthesis global	Kynurenine 3-monooxygenase (EC 1.14.13.9)	<a href=&#39;?page=Annotation&feature=fig|6666666.640606.peg.1851&#39; target=_blank>fig|6666666.640606.peg.1851</a>	yes	<a href=&#39;?page=Annotation&feature=fig|6666666.640605.peg.551&#39; target=_blank>fig|6666666.640605.peg.551</a>	yes
A and B	Cofactors, Vitamins, Prosthetic Groups, Pigments	NAD and NADP	NAD and NADP cofactor biosynthesis global	NAD kinase (EC 2.7.1.23)	<a href=&#39;?page=Annotation&feature=fig|6666666.640606.peg.1356&#39; target=_blank>fig|6666666.640606.peg.1356</a>	yes	<a href=&#39;?page=Annotation&feature=fig|6666666.640605.peg.3385&#39; target=_blank>fig|6666666.640605.peg.3385</a>	yes
A and B	Cofactors, Vitamins, Prosthetic Groups, Pigments	NAD and NADP	NAD and NADP cofactor biosynthesis global	NAD synthetase (EC 6.3.1.5)	<a href=&#39;?page=Annotation&feature=fig|6666666.640606.peg.483&#39; target=_blank>fig|6666666.640606.peg.483</a>	yes	<a href=&#39;?page=Annotation&feature=fig|6666666.640605.peg.128&#39; target=_blank>fig|6666666.640605.peg.128</a>	yes
A and B	Cofactors, Vitamins, Prosthetic Groups, Pigments	NAD and NADP	NAD and NADP cofactor biosynthesis global	Nicotinamidase (EC 3.5.1.19)	<a href=&#39;?page=Annotation&feature=fig|6666666.640606.peg.532&#39; target=_blank>fig|6666666.640606.peg.532</a>	yes	<a href=&#39;?page=Annotation&feature=fig|6666666.640605.peg.100&#39; target=_blank>fig|6666666.640605.peg.100</a>	yes
A and B	Cofactors, Vitamins, Prosthetic Groups, Pigments	NAD and NADP	NAD and NADP cofactor biosynthesis global	Nicotinate-nucleotide adenylyltransferase (EC 2.7.7.18)	<a href=&#39;?page=Annotation&feature=fig|6666666.640606.peg.1045&#39; target=_blank>fig|6666666.640606.peg.1045</a>	yes	<a href=&#39;?page=Annotation&feature=fig|6666666.640605.peg.3610&#39; target=_blank>fig|6666666.640605.peg.3610</a>	yes
A and B	Cofactors, Vitamins, Prosthetic Groups, Pigments	NAD and NADP	NAD and NADP cofactor biosynthesis global	Quinolinate phosphoribosyltransferase [decarboxylating] (EC 2.4.2.19)	<a href=&#39;?page=Annotation&feature=fig|6666666.640606.peg.1951&#39; target=_blank>fig|6666666.640606.peg.1951</a>	yes	<a href=&#39;?page=Annotation&feature=fig|6666666.640605.peg.2869&#39; target=_blank>fig|6666666.640605.peg.2869</a>	yes
A and B	Cofactors, Vitamins, Prosthetic Groups, Pigments	NAD and NADP	NAD and NADP cofactor biosynthesis global	Ribosyl nicotinamide transporter, PnuC-like	<a href=&#39;?page=Annotation&feature=fig|6666666.640606.peg.1154&#39; target=_blank>fig|6666666.640606.peg.1154</a>	yes	<a href=&#39;?page=Annotation&feature=fig|6666666.640605.peg.189&#39; target=_blank>fig|6666666.640605.peg.189</a>, <a href=&#39;?page=Annotation&feature=fig|6666666.640605.peg.832&#39; target=_blank>fig|6666666.640605.peg.832</a>	yes
A and B	Cofactors, Vitamins, Prosthetic Groups, Pigments	NAD and NADP	NAD and NADP cofactor biosynthesis global	Ribosylnicotinamide kinase (EC 2.7.1.22)	<a href=&#39;?page=Annotation&feature=fig|6666666.640606.peg.1153&#39; target=_blank>fig|6666666.640606.peg.1153</a>	yes	<a href=&#39;?page=Annotation&feature=fig|6666666.640605.peg.831&#39; target=_blank>fig|6666666.640605.peg.831</a>	yes
A and B	Cofactors, Vitamins, Prosthetic Groups, Pigments	NAD and NADP	NAD and NADP cofactor biosynthesis global	Tryptophan 2,3-dioxygenase (EC 1.13.11.11)	<a href=&#39;?page=Annotation&feature=fig|6666666.640606.peg.2251&#39; target=_blank>fig|6666666.640606.peg.2251</a>	yes	<a href=&#39;?page=Annotation&feature=fig|6666666.640605.peg.10&#39; target=_blank>fig|6666666.640605.peg.10</a>	yes
A and B	Cofactors, Vitamins, Prosthetic Groups, Pigments	Pyridoxine	Pyridoxin (Vitamin B6) Biosynthesis	1-deoxy-D-xylulose 5-phosphate synthase (EC 2.2.1.7)	<a href=&#39;?page=Annotation&feature=fig|6666666.640606.peg.1208&#39; target=_blank>fig|6666666.640606.peg.1208</a>	yes	<a href=&#39;?page=Annotation&feature=fig|6666666.640605.peg.781&#39; target=_blank>fig|6666666.640605.peg.781</a>	yes
A and B	Cofactors, Vitamins, Prosthetic Groups, Pigments	Pyridoxine	Pyridoxin (Vitamin B6) Biosynthesis	4-hydroxythreonine-4-phosphate dehydrogenase (EC 1.1.1.262)	<a href=&#39;?page=Annotation&feature=fig|6666666.640606.peg.3251&#39; target=_blank>fig|6666666.640606.peg.3251</a>	yes	<a href=&#39;?page=Annotation&feature=fig|6666666.640605.peg.21&#39; target=_blank>fig|6666666.640605.peg.21</a>	yes
A and B	Cofactors, Vitamins, Prosthetic Groups, Pigments	Pyridoxine	Pyridoxin (Vitamin B6) Biosynthesis	D-3-phosphoglycerate dehydrogenase (EC 1.1.1.95)	<a href=&#39;?page=Annotation&feature=fig|6666666.640606.peg.255&#39; target=_blank>fig|6666666.640606.peg.255</a>, <a href=&#39;?page=Annotation&feature=fig|6666666.640606.peg.2121&#39; target=_blank>fig|6666666.640606.peg.2121</a>, <a href=&#39;?page=Annotation&feature=fig|6666666.640606.peg.2283&#39; target=_blank>fig|6666666.640606.peg.2283</a>, <a href=&#39;?page=Annotation&feature=fig|66666…	yes	<a href=&#39;?page=Annotation&feature=fig|6666666.640605.peg.18&#39; target=_blank>fig|6666666.640605.peg.18</a>, <a href=&#39;?page=Annotation&feature=fig|6666666.640605.peg.1663&#39; target=_blank>fig|6666666.640605.peg.1663</a>, <a href=&#39;?page=Annotation&feature=fig|6666666.640605.peg.3020&#39; target=_blank>fig|6666666.640605.peg.3020</a>	yes
A and B	Cofactors, Vitamins, Prosthetic Groups, Pigments	Pyridoxine	Pyridoxin (Vitamin B6) Biosynthesis	NAD-dependent glyceraldehyde-3-phosphate dehydrogenase (EC 1.2.1.12)	<a href=&#39;?page=Annotation&feature=fig|6666666.640606.peg.2101&#39; target=_blank>fig|6666666.640606.peg.2101</a>, <a href=&#39;?page=Annotation&feature=fig|6666666.640606.peg.3438&#39; target=_blank>fig|6666666.640606.peg.3438</a>	yes	<a href=&#39;?page=Annotation&feature=fig|6666666.640605.peg.2994&#39; target=_blank>fig|6666666.640605.peg.2994</a>, <a href=&#39;?page=Annotation&feature=fig|6666666.640605.peg.3094&#39; target=_blank>fig|6666666.640605.peg.3094</a>	yes
A and B	Cofactors, Vitamins, Prosthetic Groups, Pigments	Pyridoxine	Pyridoxin (Vitamin B6) Biosynthesis	Phosphoserine aminotransferase (EC 2.6.1.52)	<a href=&#39;?page=Annotation&feature=fig|6666666.640606.peg.1598&#39; target=_blank>fig|6666666.640606.peg.1598</a>	yes	<a href=&#39;?page=Annotation&feature=fig|6666666.640605.peg.2117&#39; target=_blank>fig|6666666.640605.peg.2117</a>	yes
A and B	Cofactors, Vitamins, Prosthetic Groups, Pigments	Pyridoxine	Pyridoxin (Vitamin B6) Biosynthesis	Pyridoxamine 5&#39;-phosphate oxidase (EC 1.4.3.5)	<a href=&#39;?page=Annotation&feature=fig|6666666.640606.peg.831&#39; target=_blank>fig|6666666.640606.peg.831</a>	yes	<a href=&#39;?page=Annotation&feature=fig|6666666.640605.peg.1853&#39; target=_blank>fig|6666666.640605.peg.1853</a>	yes
A and B	Cofactors, Vitamins, Prosthetic Groups, Pigments	Pyridoxine	Pyridoxin (Vitamin B6) Biosynthesis	Pyridoxine 5&#39;-phosphate synthase (EC 2.6.99.2)	<a href=&#39;?page=Annotation&feature=fig|6666666.640606.peg.1439&#39; target=_blank>fig|6666666.640606.peg.1439</a>	yes	<a href=&#39;?page=Annotation&feature=fig|6666666.640605.peg.2149&#39; target=_blank>fig|6666666.640605.peg.2149</a>	yes
A and B	Cofactors, Vitamins, Prosthetic Groups, Pigments	Quinone cofactors	Menaquinone and Phylloquinone Biosynthesis	1,4-dihydroxy-2-naphthoate polyprenyltransferase (EC 2.5.1.74)	<a href=&#39;?page=Annotation&feature=fig|6666666.640606.peg.705&#39; target=_blank>fig|6666666.640606.peg.705</a>	yes	<a href=&#39;?page=Annotation&feature=fig|6666666.640605.peg.3262&#39; target=_blank>fig|6666666.640605.peg.3262</a>	yes
A and B	Cofactors, Vitamins, Prosthetic Groups, Pigments	Quinone cofactors	Menaquinone and Phylloquinone Biosynthesis	2-succinyl-5-enolpyruvyl-6-hydroxy-3-cyclohexene-1-carboxylic-acid synthase (EC 2.2.1.9)	<a href=&#39;?page=Annotation&feature=fig|6666666.640606.peg.3380&#39; target=_blank>fig|6666666.640606.peg.3380</a>	yes	<a href=&#39;?page=Annotation&feature=fig|6666666.640605.peg.2515&#39; target=_blank>fig|6666666.640605.peg.2515</a>	yes
A and B	Cofactors, Vitamins, Prosthetic Groups, Pigments	Quinone cofactors	Menaquinone and Phylloquinone Biosynthesis	Menaquinone-specific isochorismate synthase (EC 5.4.4.2)	<a href=&#39;?page=Annotation&feature=fig|6666666.640606.peg.3379&#39; target=_blank>fig|6666666.640606.peg.3379</a>	yes	<a href=&#39;?page=Annotation&feature=fig|6666666.640605.peg.2516&#39; target=_blank>fig|6666666.640605.peg.2516</a>	yes
A and B	Cofactors, Vitamins, Prosthetic Groups, Pigments	Quinone cofactors	Menaquinone and Phylloquinone Biosynthesis	Naphthoate synthase (EC 4.1.3.36)	<a href=&#39;?page=Annotation&feature=fig|6666666.640606.peg.3306&#39; target=_blank>fig|6666666.640606.peg.3306</a>	yes	<a href=&#39;?page=Annotation&feature=fig|6666666.640605.peg.2507&#39; target=_blank>fig|6666666.640605.peg.2507</a>	yes
A and B	Cofactors, Vitamins, Prosthetic Groups, Pigments	Quinone cofactors	Menaquinone and Phylloquinone Biosynthesis	O-succinylbenzoate synthase (EC 4.2.1.113)	<a href=&#39;?page=Annotation&feature=fig|6666666.640606.peg.2631&#39; target=_blank>fig|6666666.640606.peg.2631</a>	yes	<a href=&#39;?page=Annotation&feature=fig|6666666.640605.peg.2284&#39; target=_blank>fig|6666666.640605.peg.2284</a>	yes
A and B	Cofactors, Vitamins, Prosthetic Groups, Pigments	Quinone cofactors	Menaquinone and Phylloquinone Biosynthesis	O-succinylbenzoic acid--CoA ligase (EC 6.2.1.26)	<a href=&#39;?page=Annotation&feature=fig|6666666.640606.peg.3307&#39; target=_blank>fig|6666666.640606.peg.3307</a>	yes	<a href=&#39;?page=Annotation&feature=fig|6666666.640605.peg.2506&#39; target=_blank>fig|6666666.640605.peg.2506</a>	yes
A and B	Cofactors, Vitamins, Prosthetic Groups, Pigments	Quinone cofactors	Menaquinone and Phylloquinone Biosynthesis -- gjo	1,4-dihydroxy-2-naphthoate polyprenyltransferase (EC 2.5.1.74)	<a href=&#39;?page=Annotation&feature=fig|6666666.640606.peg.705&#39; target=_blank>fig|6666666.640606.peg.705</a>	yes	<a href=&#39;?page=Annotation&feature=fig|6666666.640605.peg.3262&#39; target=_blank>fig|6666666.640605.peg.3262</a>	yes
A and B	Cofactors, Vitamins, Prosthetic Groups, Pigments	Quinone cofactors	Menaquinone and Phylloquinone Biosynthesis -- gjo	2-succinyl-5-enolpyruvyl-6-hydroxy-3-cyclohexene-1-carboxylic-acid synthase (EC 2.2.1.9)	<a href=&#39;?page=Annotation&feature=fig|6666666.640606.peg.3380&#39; target=_blank>fig|6666666.640606.peg.3380</a>	yes	<a href=&#39;?page=Annotation&feature=fig|6666666.640605.peg.2515&#39; target=_blank>fig|6666666.640605.peg.2515</a>	yes
A and B	Cofactors, Vitamins, Prosthetic Groups, Pigments	Quinone cofactors	Menaquinone and Phylloquinone Biosynthesis -- gjo	Menaquinone-specific isochorismate synthase (EC 5.4.4.2)	<a href=&#39;?page=Annotation&feature=fig|6666666.640606.peg.3379&#39; target=_blank>fig|6666666.640606.peg.3379</a>	yes	<a href=&#39;?page=Annotation&feature=fig|6666666.640605.peg.2516&#39; target=_blank>fig|6666666.640605.peg.2516</a>	yes
A and B	Cofactors, Vitamins, Prosthetic Groups, Pigments	Quinone cofactors	Menaquinone and Phylloquinone Biosynthesis -- gjo	Naphthoate synthase (EC 4.1.3.36)	<a href=&#39;?page=Annotation&feature=fig|6666666.640606.peg.3306&#39; target=_blank>fig|6666666.640606.peg.3306</a>	yes	<a href=&#39;?page=Annotation&feature=fig|6666666.640605.peg.2507&#39; target=_blank>fig|6666666.640605.peg.2507</a>	yes
A and B	Cofactors, Vitamins, Prosthetic Groups, Pigments	Quinone cofactors	Menaquinone and Phylloquinone Biosynthesis -- gjo	O-succinylbenzoate synthase (EC 4.2.1.113)	<a href=&#39;?page=Annotation&feature=fig|6666666.640606.peg.2631&#39; target=_blank>fig|6666666.640606.peg.2631</a>	yes	<a href=&#39;?page=Annotation&feature=fig|6666666.640605.peg.2284&#39; target=_blank>fig|6666666.640605.peg.2284</a>	yes
A and B	Cofactors, Vitamins, Prosthetic Groups, Pigments	Quinone cofactors	Menaquinone and Phylloquinone Biosynthesis -- gjo	O-succinylbenzoic acid--CoA ligase (EC 6.2.1.26)	<a href=&#39;?page=Annotation&feature=fig|6666666.640606.peg.3307&#39; target=_blank>fig|6666666.640606.peg.3307</a>	yes	<a href=&#39;?page=Annotation&feature=fig|6666666.640605.peg.2506&#39; target=_blank>fig|6666666.640605.peg.2506</a>	yes
A and B	Cofactors, Vitamins, Prosthetic Groups, Pigments	Riboflavin, FMN, FAD	Riboflavin, FMN and FAD metabolism	3,4-dihydroxy-2-butanone 4-phosphate synthase (EC 4.1.99.12)	<a href=&#39;?page=Annotation&feature=fig|6666666.640606.peg.3579&#39; target=_blank>fig|6666666.640606.peg.3579</a>	yes	<a href=&#39;?page=Annotation&feature=fig|6666666.640605.peg.86&#39; target=_blank>fig|6666666.640605.peg.86</a>	yes
A and B	Cofactors, Vitamins, Prosthetic Groups, Pigments	Riboflavin, FMN, FAD	Riboflavin, FMN and FAD metabolism	5-amino-6-(5-phosphoribosylamino)uracil reductase (EC 1.1.1.193)	<a href=&#39;?page=Annotation&feature=fig|6666666.640606.peg.1857&#39; target=_blank>fig|6666666.640606.peg.1857</a>	yes	<a href=&#39;?page=Annotation&feature=fig|6666666.640605.peg.778&#39; target=_blank>fig|6666666.640605.peg.778</a>	yes
A and B	Cofactors, Vitamins, Prosthetic Groups, Pigments	Riboflavin, FMN, FAD	Riboflavin, FMN and FAD metabolism	6,7-dimethyl-8-ribityllumazine synthase (EC 2.5.1.78)	<a href=&#39;?page=Annotation&feature=fig|6666666.640606.peg.1735&#39; target=_blank>fig|6666666.640606.peg.1735</a>	yes	<a href=&#39;?page=Annotation&feature=fig|6666666.640605.peg.2106&#39; target=_blank>fig|6666666.640605.peg.2106</a>	yes
A and B	Cofactors, Vitamins, Prosthetic Groups, Pigments	Riboflavin, FMN, FAD	Riboflavin, FMN and FAD metabolism	Diaminohydroxyphosphoribosylaminopyrimidine deaminase (EC 3.5.4.26)	<a href=&#39;?page=Annotation&feature=fig|6666666.640606.peg.1857&#39; target=_blank>fig|6666666.640606.peg.1857</a>	yes	<a href=&#39;?page=Annotation&feature=fig|6666666.640605.peg.778&#39; target=_blank>fig|6666666.640605.peg.778</a>	yes
A and B	Cofactors, Vitamins, Prosthetic Groups, Pigments	Riboflavin, FMN, FAD	Riboflavin, FMN and FAD metabolism	FMN adenylyltransferase (EC 2.7.7.2)	<a href=&#39;?page=Annotation&feature=fig|6666666.640606.peg.894&#39; target=_blank>fig|6666666.640606.peg.894</a>	yes	<a href=&#39;?page=Annotation&feature=fig|6666666.640605.peg.1759&#39; target=_blank>fig|6666666.640605.peg.1759</a>	yes
A and B	Cofactors, Vitamins, Prosthetic Groups, Pigments	Riboflavin, FMN, FAD	Riboflavin, FMN and FAD metabolism	GTP cyclohydrolase II (EC 3.5.4.25)	<a href=&#39;?page=Annotation&feature=fig|6666666.640606.peg.3579&#39; target=_blank>fig|6666666.640606.peg.3579</a>	yes	<a href=&#39;?page=Annotation&feature=fig|6666666.640605.peg.86&#39; target=_blank>fig|6666666.640605.peg.86</a>	yes
A and B	Cofactors, Vitamins, Prosthetic Groups, Pigments	Riboflavin, FMN, FAD	Riboflavin, FMN and FAD metabolism	Riboflavin kinase (EC 2.7.1.26)	<a href=&#39;?page=Annotation&feature=fig|6666666.640606.peg.894&#39; target=_blank>fig|6666666.640606.peg.894</a>	yes	<a href=&#39;?page=Annotation&feature=fig|6666666.640605.peg.1759&#39; target=_blank>fig|6666666.640605.peg.1759</a>	yes
A and B	Cofactors, Vitamins, Prosthetic Groups, Pigments	Riboflavin, FMN, FAD	Riboflavin, FMN and FAD metabolism	Riboflavin synthase eubacterial/eukaryotic (EC 2.5.1.9)	<a href=&#39;?page=Annotation&feature=fig|6666666.640606.peg.740&#39; target=_blank>fig|6666666.640606.peg.740</a>	yes	<a href=&#39;?page=Annotation&feature=fig|6666666.640605.peg.1732&#39; target=_blank>fig|6666666.640605.peg.1732</a>	yes
A and B	Cofactors, Vitamins, Prosthetic Groups, Pigments	Riboflavin, FMN, FAD	riboflavin to FAD	3,4-dihydroxy-2-butanone 4-phosphate synthase (EC 4.1.99.12)	<a href=&#39;?page=Annotation&feature=fig|6666666.640606.peg.3579&#39; target=_blank>fig|6666666.640606.peg.3579</a>	yes	<a href=&#39;?page=Annotation&feature=fig|6666666.640605.peg.86&#39; target=_blank>fig|6666666.640605.peg.86</a>	yes
A and B	Cofactors, Vitamins, Prosthetic Groups, Pigments	Riboflavin, FMN, FAD	riboflavin to FAD	FMN adenylyltransferase (EC 2.7.7.2)	<a href=&#39;?page=Annotation&feature=fig|6666666.640606.peg.894&#39; target=_blank>fig|6666666.640606.peg.894</a>	yes	<a href=&#39;?page=Annotation&feature=fig|6666666.640605.peg.1759&#39; target=_blank>fig|6666666.640605.peg.1759</a>	yes
A and B	Cofactors, Vitamins, Prosthetic Groups, Pigments	Riboflavin, FMN, FAD	riboflavin to FAD	Riboflavin kinase (EC 2.7.1.26)	<a href=&#39;?page=Annotation&feature=fig|6666666.640606.peg.894&#39; target=_blank>fig|6666666.640606.peg.894</a>	yes	<a href=&#39;?page=Annotation&feature=fig|6666666.640605.peg.1759&#39; target=_blank>fig|6666666.640605.peg.1759</a>	yes
A and B	Cofactors, Vitamins, Prosthetic Groups, Pigments	Riboflavin, FMN, FAD	riboflavin to FAD	Riboflavin synthase eubacterial/eukaryotic (EC 2.5.1.9)	<a href=&#39;?page=Annotation&feature=fig|6666666.640606.peg.740&#39; target=_blank>fig|6666666.640606.peg.740</a>	yes	<a href=&#39;?page=Annotation&feature=fig|6666666.640605.peg.1732&#39; target=_blank>fig|6666666.640605.peg.1732</a>	yes
A and B	Cofactors, Vitamins, Prosthetic Groups, Pigments	Tetrapyrroles	Heme and Siroheme Biosynthesis	Coproporphyrinogen III oxidase, aerobic (EC 1.3.3.3)	<a href=&#39;?page=Annotation&feature=fig|6666666.640606.peg.2616&#39; target=_blank>fig|6666666.640606.peg.2616</a>	yes	<a href=&#39;?page=Annotation&feature=fig|6666666.640605.peg.2290&#39; target=_blank>fig|6666666.640605.peg.2290</a>	yes
A and B	Cofactors, Vitamins, Prosthetic Groups, Pigments	Tetrapyrroles	Heme and Siroheme Biosynthesis	Coproporphyrinogen III oxidase, oxygen-independent (EC 1.3.99.22)	<a href=&#39;?page=Annotation&feature=fig|6666666.640606.peg.2726&#39; target=_blank>fig|6666666.640606.peg.2726</a>	yes	<a href=&#39;?page=Annotation&feature=fig|6666666.640605.peg.3866&#39; target=_blank>fig|6666666.640605.peg.3866</a>	yes
A and B	Cofactors, Vitamins, Prosthetic Groups, Pigments	Tetrapyrroles	Heme and Siroheme Biosynthesis	Ferrochelatase, protoheme ferro-lyase (EC 4.99.1.1)	<a href=&#39;?page=Annotation&feature=fig|6666666.640606.peg.1500&#39; target=_blank>fig|6666666.640606.peg.1500</a>	yes	<a href=&#39;?page=Annotation&feature=fig|6666666.640605.peg.484&#39; target=_blank>fig|6666666.640605.peg.484</a>	yes
A and B	Cofactors, Vitamins, Prosthetic Groups, Pigments	Tetrapyrroles	Heme and Siroheme Biosynthesis	Glutamyl-tRNA reductase (EC 1.2.1.70)	<a href=&#39;?page=Annotation&feature=fig|6666666.640606.peg.2358&#39; target=_blank>fig|6666666.640606.peg.2358</a>	yes	<a href=&#39;?page=Annotation&feature=fig|6666666.640605.peg.354&#39; target=_blank>fig|6666666.640605.peg.354</a>	yes
A and B	Cofactors, Vitamins, Prosthetic Groups, Pigments	Tetrapyrroles	Heme and Siroheme Biosynthesis	Glutamyl-tRNA synthetase (EC 6.1.1.17)	<a href=&#39;?page=Annotation&feature=fig|6666666.640606.peg.1420&#39; target=_blank>fig|6666666.640606.peg.1420</a>	yes	<a href=&#39;?page=Annotation&feature=fig|6666666.640605.peg.2123&#39; target=_blank>fig|6666666.640605.peg.2123</a>	yes
A and B	Cofactors, Vitamins, Prosthetic Groups, Pigments	Tetrapyrroles	Heme and Siroheme Biosynthesis	Porphobilinogen deaminase (EC 2.5.1.61)	<a href=&#39;?page=Annotation&feature=fig|6666666.640606.peg.54&#39; target=_blank>fig|6666666.640606.peg.54</a>	yes	<a href=&#39;?page=Annotation&feature=fig|6666666.640605.peg.959&#39; target=_blank>fig|6666666.640605.peg.959</a>	yes
A and B	Cofactors, Vitamins, Prosthetic Groups, Pigments	Tetrapyrroles	Heme and Siroheme Biosynthesis	Porphobilinogen synthase (EC 4.2.1.24)	<a href=&#39;?page=Annotation&feature=fig|6666666.640606.peg.21&#39; target=_blank>fig|6666666.640606.peg.21</a>	yes	<a href=&#39;?page=Annotation&feature=fig|6666666.640605.peg.917&#39; target=_blank>fig|6666666.640605.peg.917</a>	yes
A and B	Cofactors, Vitamins, Prosthetic Groups, Pigments	Tetrapyrroles	Heme and Siroheme Biosynthesis	Precorrin-2 oxidase (EC 1.3.1.76)	<a href=&#39;?page=Annotation&feature=fig|6666666.640606.peg.1067&#39; target=_blank>fig|6666666.640606.peg.1067</a>	yes	<a href=&#39;?page=Annotation&feature=fig|6666666.640605.peg.2169&#39; target=_blank>fig|6666666.640605.peg.2169</a>	yes
A and B	Cofactors, Vitamins, Prosthetic Groups, Pigments	Tetrapyrroles	Heme and Siroheme Biosynthesis	Protoporphyrinogen IX oxidase, novel form, HemJ (EC 1.3.-.-)	<a href=&#39;?page=Annotation&feature=fig|6666666.640606.peg.3078&#39; target=_blank>fig|6666666.640606.peg.3078</a>	yes	<a href=&#39;?page=Annotation&feature=fig|6666666.640605.peg.1142&#39; target=_blank>fig|6666666.640605.peg.1142</a>	yes
A and B	Cofactors, Vitamins, Prosthetic Groups, Pigments	Tetrapyrroles	Heme and Siroheme Biosynthesis	Uroporphyrinogen III decarboxylase (EC 4.1.1.37)	<a href=&#39;?page=Annotation&feature=fig|6666666.640606.peg.29&#39; target=_blank>fig|6666666.640606.peg.29</a>	yes	<a href=&#39;?page=Annotation&feature=fig|6666666.640605.peg.926&#39; target=_blank>fig|6666666.640605.peg.926</a>	yes
A and B	Cofactors, Vitamins, Prosthetic Groups, Pigments	Tetrapyrroles	Heme and Siroheme Biosynthesis	Uroporphyrinogen-III methyltransferase (EC 2.1.1.107)	<a href=&#39;?page=Annotation&feature=fig|6666666.640606.peg.1068&#39; target=_blank>fig|6666666.640606.peg.1068</a>	yes	<a href=&#39;?page=Annotation&feature=fig|6666666.640605.peg.2168&#39; target=_blank>fig|6666666.640605.peg.2168</a>	yes
A and B	Cofactors, Vitamins, Prosthetic Groups, Pigments	Tetrapyrroles	Heme and Siroheme Biosynthesis	Uroporphyrinogen-III synthase (EC 4.2.1.75)	<a href=&#39;?page=Annotation&feature=fig|6666666.640606.peg.1384&#39; target=_blank>fig|6666666.640606.peg.1384</a>	yes	<a href=&#39;?page=Annotation&feature=fig|6666666.640605.peg.3417&#39; target=_blank>fig|6666666.640605.peg.3417</a>	yes
A and B	Cofactors, Vitamins, Prosthetic Groups, Pigments	no subcategory	Thiamin biosynthesis	1-deoxy-D-xylulose 5-phosphate synthase (EC 2.2.1.7)	<a href=&#39;?page=Annotation&feature=fig|6666666.640606.peg.1208&#39; target=_blank>fig|6666666.640606.peg.1208</a>	yes	<a href=&#39;?page=Annotation&feature=fig|6666666.640605.peg.781&#39; target=_blank>fig|6666666.640605.peg.781</a>	yes
A and B	Cofactors, Vitamins, Prosthetic Groups, Pigments	no subcategory	Thiamin biosynthesis	Thiamin-regulated outer membrane receptor Omr1	<a href=&#39;?page=Annotation&feature=fig|6666666.640606.peg.1961&#39; target=_blank>fig|6666666.640606.peg.1961</a>	yes	<a href=&#39;?page=Annotation&feature=fig|6666666.640605.peg.800&#39; target=_blank>fig|6666666.640605.peg.800</a>	yes
A and B	Cofactors, Vitamins, Prosthetic Groups, Pigments	no subcategory	Thiamin biosynthesis	Thiamine-monophosphate kinase (EC 2.7.4.16)	<a href=&#39;?page=Annotation&feature=fig|6666666.640606.peg.2455&#39; target=_blank>fig|6666666.640606.peg.2455</a>	yes	<a href=&#39;?page=Annotation&feature=fig|6666666.640605.peg.295&#39; target=_blank>fig|6666666.640605.peg.295</a>	yes
A	Cofactors, Vitamins, Prosthetic Groups, Pigments	no subcategory	Thiamin biosynthesis	Hydroxymethylpyrimidine ABC transporter, substrate-binding component	<a href=&#39;?page=Annotation&feature=fig|6666666.640606.peg.3739&#39; target=_blank>fig|6666666.640606.peg.3739</a>	yes	<input type=&#39;button&#39; class=&#39;button&#39; value=&#39;find&#39; onclick=&#39;window.open("?page=SearchGene&fr=Hydroxymethylpyrimidine ABC transporter, substrate-binding component&organism=6666666.640605&subsystem=Thiamin_biosynthesis&template_gene=fig|6666666.640606.peg.3739");&#39;>	no
A	DNA Metabolism	CRISPs	CRISPRs	CRISPR repeat RNA endoribonuclease Cas6	<a href=&#39;?page=Annotation&feature=fig|6666666.640606.peg.1214&#39; target=_blank>fig|6666666.640606.peg.1214</a>	yes	<input type=&#39;button&#39; class=&#39;button&#39; value=&#39;find&#39; onclick=&#39;window.open("?page=SearchGene&fr=CRISPR repeat RNA endoribonuclease Cas6&organism=6666666.640605&subsystem=CRISPRs&template_gene=fig|6666666.640606.peg.1214");&#39;>	no
A	DNA Metabolism	CRISPs	CRISPRs	CRISPR-associated helicase Cas3	<a href=&#39;?page=Annotation&feature=fig|6666666.640606.peg.1218&#39; target=_blank>fig|6666666.640606.peg.1218</a>	yes	<input type=&#39;button&#39; class=&#39;button&#39; value=&#39;find&#39; onclick=&#39;window.open("?page=SearchGene&fr=CRISPR-associated helicase Cas3&organism=6666666.640605&subsystem=CRISPRs&template_gene=fig|6666666.640606.peg.1218");&#39;>	no
A	DNA Metabolism	CRISPs	CRISPRs	CRISPR-associated protein Cas1	<a href=&#39;?page=Annotation&feature=fig|6666666.640606.peg.1220&#39; target=_blank>fig|6666666.640606.peg.1220</a>	yes	<input type=&#39;button&#39; class=&#39;button&#39; value=&#39;find&#39; onclick=&#39;window.open("?page=SearchGene&fr=CRISPR-associated protein Cas1&organism=6666666.640605&subsystem=CRISPRs&template_gene=fig|6666666.640606.peg.1220");&#39;>	no
A	DNA Metabolism	CRISPs	CRISPRs	CRISPR-associated protein Cas2	<a href=&#39;?page=Annotation&feature=fig|6666666.640606.peg.1221&#39; target=_blank>fig|6666666.640606.peg.1221</a>	yes	<input type=&#39;button&#39; class=&#39;button&#39; value=&#39;find&#39; onclick=&#39;window.open("?page=SearchGene&fr=CRISPR-associated protein Cas2&organism=6666666.640605&subsystem=CRISPRs&template_gene=fig|6666666.640606.peg.1221");&#39;>	no
A	DNA Metabolism	CRISPs	CRISPRs	CRISPR-associated protein, Csd1 family	<a href=&#39;?page=Annotation&feature=fig|6666666.640606.peg.1215&#39; target=_blank>fig|6666666.640606.peg.1215</a>	yes	<input type=&#39;button&#39; class=&#39;button&#39; value=&#39;find&#39; onclick=&#39;window.open("?page=SearchGene&fr=CRISPR-associated protein, Csd1 family&organism=6666666.640605&subsystem=CRISPRs&template_gene=fig|6666666.640606.peg.1215");&#39;>	no
A and B	DNA Metabolism	DNA repair	DNA repair, UvrABC system	Excinuclease ABC subunit A	<a href=&#39;?page=Annotation&feature=fig|6666666.640606.peg.1168&#39; target=_blank>fig|6666666.640606.peg.1168</a>	yes	<a href=&#39;?page=Annotation&feature=fig|6666666.640605.peg.688&#39; target=_blank>fig|6666666.640605.peg.688</a>	yes
A and B	DNA Metabolism	DNA repair	DNA repair, UvrABC system	Excinuclease ABC subunit A paralog in greater Bacteroides group	<a href=&#39;?page=Annotation&feature=fig|6666666.640606.peg.1158&#39; target=_blank>fig|6666666.640606.peg.1158</a>	yes	<a href=&#39;?page=Annotation&feature=fig|6666666.640605.peg.834&#39; target=_blank>fig|6666666.640605.peg.834</a>	yes
A and B	DNA Metabolism	DNA repair	DNA repair, UvrABC system	Excinuclease ABC subunit B	<a href=&#39;?page=Annotation&feature=fig|6666666.640606.peg.3720&#39; target=_blank>fig|6666666.640606.peg.3720</a>	yes	<a href=&#39;?page=Annotation&feature=fig|6666666.640605.peg.3346&#39; target=_blank>fig|6666666.640605.peg.3346</a>	yes
A and B	DNA Metabolism	DNA repair	DNA repair, UvrABC system	Excinuclease ABC subunit C	<a href=&#39;?page=Annotation&feature=fig|6666666.640606.peg.1390&#39; target=_blank>fig|6666666.640606.peg.1390</a>	yes	<a href=&#39;?page=Annotation&feature=fig|6666666.640605.peg.3423&#39; target=_blank>fig|6666666.640605.peg.3423</a>	yes
A and B	DNA Metabolism	DNA repair	DNA repair, bacterial	A/G-specific adenine glycosylase (EC 3.2.2.-)	<a href=&#39;?page=Annotation&feature=fig|6666666.640606.peg.1241&#39; target=_blank>fig|6666666.640606.peg.1241</a>	yes	<a href=&#39;?page=Annotation&feature=fig|6666666.640605.peg.3319&#39; target=_blank>fig|6666666.640605.peg.3319</a>	yes
A and B	DNA Metabolism	DNA repair	DNA repair, bacterial	Alkylated DNA repair protein AlkB	<a href=&#39;?page=Annotation&feature=fig|6666666.640606.peg.219&#39; target=_blank>fig|6666666.640606.peg.219</a>	yes	<a href=&#39;?page=Annotation&feature=fig|6666666.640605.peg.230&#39; target=_blank>fig|6666666.640605.peg.230</a>	yes
A and B	DNA Metabolism	DNA repair	DNA repair, bacterial	DNA polymerase IV (EC 2.7.7.7)	<a href=&#39;?page=Annotation&feature=fig|6666666.640606.peg.3170&#39; target=_blank>fig|6666666.640606.peg.3170</a>, <a href=&#39;?page=Annotation&feature=fig|6666666.640606.peg.3191&#39; target=_blank>fig|6666666.640606.peg.3191</a>	yes	<a href=&#39;?page=Annotation&feature=fig|6666666.640605.peg.396&#39; target=_blank>fig|6666666.640605.peg.396</a>, <a href=&#39;?page=Annotation&feature=fig|6666666.640605.peg.3203&#39; target=_blank>fig|6666666.640605.peg.3203</a>	yes
A and B	DNA Metabolism	DNA repair	DNA repair, bacterial	DNA recombination protein RmuC	<a href=&#39;?page=Annotation&feature=fig|6666666.640606.peg.672&#39; target=_blank>fig|6666666.640606.peg.672</a>	yes	<a href=&#39;?page=Annotation&feature=fig|6666666.640605.peg.2972&#39; target=_blank>fig|6666666.640605.peg.2972</a>	yes
A and B	DNA Metabolism	DNA repair	DNA repair, bacterial	DNA repair protein RadA	<a href=&#39;?page=Annotation&feature=fig|6666666.640606.peg.1941&#39; target=_blank>fig|6666666.640606.peg.1941</a>	yes	<a href=&#39;?page=Annotation&feature=fig|6666666.640605.peg.2877&#39; target=_blank>fig|6666666.640605.peg.2877</a>	yes
A and B	DNA Metabolism	DNA repair	DNA repair, bacterial	DNA repair protein RecN	<a href=&#39;?page=Annotation&feature=fig|6666666.640606.peg.1681&#39; target=_blank>fig|6666666.640606.peg.1681</a>	yes	<a href=&#39;?page=Annotation&feature=fig|6666666.640605.peg.3695&#39; target=_blank>fig|6666666.640605.peg.3695</a>	yes
A and B	DNA Metabolism	DNA repair	DNA repair, bacterial	Exodeoxyribonuclease III (EC 3.1.11.2)	<a href=&#39;?page=Annotation&feature=fig|6666666.640606.peg.1873&#39; target=_blank>fig|6666666.640606.peg.1873</a>	yes	<a href=&#39;?page=Annotation&feature=fig|6666666.640605.peg.860&#39; target=_blank>fig|6666666.640605.peg.860</a>	yes
A and B	DNA Metabolism	DNA repair	DNA repair, bacterial	Exodeoxyribonuclease VII large subunit (EC 3.1.11.6)	<a href=&#39;?page=Annotation&feature=fig|6666666.640606.peg.3214&#39; target=_blank>fig|6666666.640606.peg.3214</a>	yes	<a href=&#39;?page=Annotation&feature=fig|6666666.640605.peg.455&#39; target=_blank>fig|6666666.640605.peg.455</a>	yes
A and B	DNA Metabolism	DNA repair	DNA repair, bacterial	Exonuclease SbcC	<a href=&#39;?page=Annotation&feature=fig|6666666.640606.peg.1694&#39; target=_blank>fig|6666666.640606.peg.1694</a>	yes	<a href=&#39;?page=Annotation&feature=fig|6666666.640605.peg.3709&#39; target=_blank>fig|6666666.640605.peg.3709</a>	yes
A and B	DNA Metabolism	DNA repair	DNA repair, bacterial	Exonuclease SbcD	<a href=&#39;?page=Annotation&feature=fig|6666666.640606.peg.1695&#39; target=_blank>fig|6666666.640606.peg.1695</a>	yes	<a href=&#39;?page=Annotation&feature=fig|6666666.640605.peg.3710&#39; target=_blank>fig|6666666.640605.peg.3710</a>	yes
A and B	DNA Metabolism	DNA repair	DNA repair, bacterial	Methylated-DNA--protein-cysteine methyltransferase (EC 2.1.1.63)	<a href=&#39;?page=Annotation&feature=fig|6666666.640606.peg.437&#39; target=_blank>fig|6666666.640606.peg.437</a>	yes	<a href=&#39;?page=Annotation&feature=fig|6666666.640605.peg.434&#39; target=_blank>fig|6666666.640605.peg.434</a>	yes
A and B	DNA Metabolism	DNA repair	DNA repair, bacterial	RecA protein	<a href=&#39;?page=Annotation&feature=fig|6666666.640606.peg.2879&#39; target=_blank>fig|6666666.640606.peg.2879</a>	yes	<a href=&#39;?page=Annotation&feature=fig|6666666.640605.peg.3061&#39; target=_blank>fig|6666666.640605.peg.3061</a>	yes
A and B	DNA Metabolism	DNA repair	DNA repair, bacterial	Single-stranded DNA-binding protein	<a href=&#39;?page=Annotation&feature=fig|6666666.640606.peg.1242&#39; target=_blank>fig|6666666.640606.peg.1242</a>, <a href=&#39;?page=Annotation&feature=fig|6666666.640606.peg.2660&#39; target=_blank>fig|6666666.640606.peg.2660</a>, <a href=&#39;?page=Annotation&feature=fig|6666666.640606.peg.3228&#39; target=_blank>fig|6666666.640606.peg.3228</a>	yes	<a href=&#39;?page=Annotation&feature=fig|6666666.640605.peg.3224&#39; target=_blank>fig|6666666.640605.peg.3224</a>, <a href=&#39;?page=Annotation&feature=fig|6666666.640605.peg.3318&#39; target=_blank>fig|6666666.640605.peg.3318</a>	yes
A and B	DNA Metabolism	DNA repair	DNA repair, bacterial MutL-MutS system	DNA mismatch repair protein MutL	<a href=&#39;?page=Annotation&feature=fig|6666666.640606.peg.1591&#39; target=_blank>fig|6666666.640606.peg.1591</a>	yes	<a href=&#39;?page=Annotation&feature=fig|6666666.640605.peg.502&#39; target=_blank>fig|6666666.640605.peg.502</a>	yes
A and B	DNA Metabolism	DNA repair	DNA repair, bacterial MutL-MutS system	DNA mismatch repair protein MutS	<a href=&#39;?page=Annotation&feature=fig|6666666.640606.peg.1884&#39; target=_blank>fig|6666666.640606.peg.1884</a>	yes	<a href=&#39;?page=Annotation&feature=fig|6666666.640605.peg.851&#39; target=_blank>fig|6666666.640605.peg.851</a>	yes
A and B	DNA Metabolism	DNA repair	DNA repair, bacterial MutL-MutS system	MutS-related protein, family 1	<a href=&#39;?page=Annotation&feature=fig|6666666.640606.peg.2085&#39; target=_blank>fig|6666666.640606.peg.2085</a>	yes	<a href=&#39;?page=Annotation&feature=fig|6666666.640605.peg.636&#39; target=_blank>fig|6666666.640605.peg.636</a>	yes
A and B	DNA Metabolism	DNA repair	DNA repair, bacterial MutL-MutS system	Recombination inhibitory protein MutS2	<a href=&#39;?page=Annotation&feature=fig|6666666.640606.peg.2719&#39; target=_blank>fig|6666666.640606.peg.2719</a>	yes	<a href=&#39;?page=Annotation&feature=fig|6666666.640605.peg.3860&#39; target=_blank>fig|6666666.640605.peg.3860</a>	yes
A and B	DNA Metabolism	DNA repair	DNA repair, bacterial RecFOR pathway	ATP-dependent DNA helicase RecQ	<a href=&#39;?page=Annotation&feature=fig|6666666.640606.peg.194&#39; target=_blank>fig|6666666.640606.peg.194</a>, <a href=&#39;?page=Annotation&feature=fig|6666666.640606.peg.2901&#39; target=_blank>fig|6666666.640606.peg.2901</a>	yes	<a href=&#39;?page=Annotation&feature=fig|6666666.640605.peg.249&#39; target=_blank>fig|6666666.640605.peg.249</a>, <a href=&#39;?page=Annotation&feature=fig|6666666.640605.peg.982&#39; target=_blank>fig|6666666.640605.peg.982</a>	yes
A and B	DNA Metabolism	DNA repair	DNA repair, bacterial RecFOR pathway	DNA recombination and repair protein RecF	<a href=&#39;?page=Annotation&feature=fig|6666666.640606.peg.1738&#39; target=_blank>fig|6666666.640606.peg.1738</a>	yes	<a href=&#39;?page=Annotation&feature=fig|6666666.640605.peg.2109&#39; target=_blank>fig|6666666.640605.peg.2109</a>	yes
A and B	DNA Metabolism	DNA repair	DNA repair, bacterial RecFOR pathway	DNA recombination and repair protein RecO	<a href=&#39;?page=Annotation&feature=fig|6666666.640606.peg.1324&#39; target=_blank>fig|6666666.640606.peg.1324</a>	yes	<a href=&#39;?page=Annotation&feature=fig|6666666.640605.peg.3355&#39; target=_blank>fig|6666666.640605.peg.3355</a>	yes
A and B	DNA Metabolism	DNA repair	DNA repair, bacterial RecFOR pathway	RecA protein	<a href=&#39;?page=Annotation&feature=fig|6666666.640606.peg.2879&#39; target=_blank>fig|6666666.640606.peg.2879</a>	yes	<a href=&#39;?page=Annotation&feature=fig|6666666.640605.peg.3061&#39; target=_blank>fig|6666666.640605.peg.3061</a>	yes
A and B	DNA Metabolism	DNA repair	DNA repair, bacterial RecFOR pathway	Recombination protein RecR	<a href=&#39;?page=Annotation&feature=fig|6666666.640606.peg.3515&#39; target=_blank>fig|6666666.640606.peg.3515</a>	yes	<a href=&#39;?page=Annotation&feature=fig|6666666.640605.peg.2031&#39; target=_blank>fig|6666666.640605.peg.2031</a>	yes
A and B	DNA Metabolism	DNA repair	DNA repair, bacterial RecFOR pathway	Single-stranded DNA-binding protein	<a href=&#39;?page=Annotation&feature=fig|6666666.640606.peg.1242&#39; target=_blank>fig|6666666.640606.peg.1242</a>, <a href=&#39;?page=Annotation&feature=fig|6666666.640606.peg.2660&#39; target=_blank>fig|6666666.640606.peg.2660</a>, <a href=&#39;?page=Annotation&feature=fig|6666666.640606.peg.3228&#39; target=_blank>fig|6666666.640606.peg.3228</a>	yes	<a href=&#39;?page=Annotation&feature=fig|6666666.640605.peg.3224&#39; target=_blank>fig|6666666.640605.peg.3224</a>, <a href=&#39;?page=Annotation&feature=fig|6666666.640605.peg.3318&#39; target=_blank>fig|6666666.640605.peg.3318</a>	yes
A and B	DNA Metabolism	DNA repair	DNA repair, bacterial photolyase	Deoxyribodipyrimidine photolyase (EC 4.1.99.3)	<a href=&#39;?page=Annotation&feature=fig|6666666.640606.peg.358&#39; target=_blank>fig|6666666.640606.peg.358</a>	yes	<a href=&#39;?page=Annotation&feature=fig|6666666.640605.peg.1222&#39; target=_blank>fig|6666666.640605.peg.1222</a>	yes
A and B	DNA Metabolism	DNA repair	DNA repair system including RecA, MutS and a hypothetical protein	DNA mismatch repair protein MutS	<a href=&#39;?page=Annotation&feature=fig|6666666.640606.peg.1884&#39; target=_blank>fig|6666666.640606.peg.1884</a>	yes	<a href=&#39;?page=Annotation&feature=fig|6666666.640605.peg.851&#39; target=_blank>fig|6666666.640605.peg.851</a>	yes
A and B	DNA Metabolism	DNA repair	DNA repair system including RecA, MutS and a hypothetical protein	RecA protein	<a href=&#39;?page=Annotation&feature=fig|6666666.640606.peg.2879&#39; target=_blank>fig|6666666.640606.peg.2879</a>	yes	<a href=&#39;?page=Annotation&feature=fig|6666666.640605.peg.3061&#39; target=_blank>fig|6666666.640605.peg.3061</a>	yes
A and B	DNA Metabolism	DNA repair	DNA repair system including RecA, MutS and a hypothetical protein	Regulatory protein RecX	<a href=&#39;?page=Annotation&feature=fig|6666666.640606.peg.1798&#39; target=_blank>fig|6666666.640606.peg.1798</a>	yes	<a href=&#39;?page=Annotation&feature=fig|6666666.640605.peg.700&#39; target=_blank>fig|6666666.640605.peg.700</a>	yes
A and B	DNA Metabolism	DNA repair	RecA and RecX	RecA protein	<a href=&#39;?page=Annotation&feature=fig|6666666.640606.peg.2879&#39; target=_blank>fig|6666666.640606.peg.2879</a>	yes	<a href=&#39;?page=Annotation&feature=fig|6666666.640605.peg.3061&#39; target=_blank>fig|6666666.640605.peg.3061</a>	yes
A and B	DNA Metabolism	DNA repair	RecA and RecX	Regulatory protein RecX	<a href=&#39;?page=Annotation&feature=fig|6666666.640606.peg.1798&#39; target=_blank>fig|6666666.640606.peg.1798</a>	yes	<a href=&#39;?page=Annotation&feature=fig|6666666.640605.peg.700&#39; target=_blank>fig|6666666.640605.peg.700</a>	yes
B	DNA Metabolism	DNA repair	DNA repair, bacterial	DNA-cytosine methyltransferase (EC 2.1.1.37)	<input type=&#39;button&#39; value=&#39;find&#39; onclick=&#39;window.open("?page=SearchGene&fr=DNA-cytosine methyltransferase (EC 2.1.1.37)&organism=6666666.640606&subsystem=DNA_repair,_bacterial&template_gene=fig|6666666.640605.peg.2849");&#39;>	no	<a href=&#39;?page=Annotation&feature=fig|6666666.640605.peg.2849&#39; target=_blank>fig|6666666.640605.peg.2849</a>	yes
A and B	DNA Metabolism	DNA replication	DNA replication strays	Error-prone repair homolog of DNA polymerase III alpha subunit (EC 2.7.7.7)	<a href=&#39;?page=Annotation&feature=fig|6666666.640606.peg.2411&#39; target=_blank>fig|6666666.640606.peg.2411</a>	yes	<a href=&#39;?page=Annotation&feature=fig|6666666.640605.peg.1495&#39; target=_blank>fig|6666666.640605.peg.1495</a>	yes
A and B	DNA Metabolism	DNA replication	DNA topoisomerases, Type I, ATP-independent	DNA topoisomerase I (EC 5.99.1.2)	<a href=&#39;?page=Annotation&feature=fig|6666666.640606.peg.3279&#39; target=_blank>fig|6666666.640606.peg.3279</a>	yes	<a href=&#39;?page=Annotation&feature=fig|6666666.640605.peg.62&#39; target=_blank>fig|6666666.640605.peg.62</a>	yes
A and B	DNA Metabolism	DNA replication	DNA topoisomerases, Type II, ATP-dependent	DNA gyrase subunit A (EC 5.99.1.3)	<a href=&#39;?page=Annotation&feature=fig|6666666.640606.peg.2290&#39; target=_blank>fig|6666666.640606.peg.2290</a>	yes	<a href=&#39;?page=Annotation&feature=fig|6666666.640605.peg.1657&#39; target=_blank>fig|6666666.640605.peg.1657</a>	yes
A and B	DNA Metabolism	DNA replication	DNA topoisomerases, Type II, ATP-dependent	DNA gyrase subunit B (EC 5.99.1.3)	<a href=&#39;?page=Annotation&feature=fig|6666666.640606.peg.516&#39; target=_blank>fig|6666666.640606.peg.516</a>	yes	<a href=&#39;?page=Annotation&feature=fig|6666666.640605.peg.2612&#39; target=_blank>fig|6666666.640605.peg.2612</a>	yes
A and B	DNA Metabolism	DNA uptake, competence	DNA processing cluster	DNA polymerase III subunits gamma and tau (EC 2.7.7.7)	<a href=&#39;?page=Annotation&feature=fig|6666666.640606.peg.73&#39; target=_blank>fig|6666666.640606.peg.73</a>	yes	<a href=&#39;?page=Annotation&feature=fig|6666666.640605.peg.3079&#39; target=_blank>fig|6666666.640605.peg.3079</a>	yes
A and B	DNA Metabolism	DNA uptake, competence	DNA processing cluster	Recombination protein RecR	<a href=&#39;?page=Annotation&feature=fig|6666666.640606.peg.3515&#39; target=_blank>fig|6666666.640606.peg.3515</a>	yes	<a href=&#39;?page=Annotation&feature=fig|6666666.640605.peg.2031&#39; target=_blank>fig|6666666.640605.peg.2031</a>	yes
A and B	DNA Metabolism	no subcategory	DNA structural proteins, bacterial	Chromosome partition protein smc	<a href=&#39;?page=Annotation&feature=fig|6666666.640606.peg.2153&#39; target=_blank>fig|6666666.640606.peg.2153</a>	yes	<a href=&#39;?page=Annotation&feature=fig|6666666.640605.peg.2722&#39; target=_blank>fig|6666666.640605.peg.2722</a>	yes
A and B	DNA Metabolism	no subcategory	DNA structural proteins, bacterial	DNA-binding protein HU	<a href=&#39;?page=Annotation&feature=fig|6666666.640606.peg.1240&#39; target=_blank>fig|6666666.640606.peg.1240</a>	yes	<a href=&#39;?page=Annotation&feature=fig|6666666.640605.peg.3320&#39; target=_blank>fig|6666666.640605.peg.3320</a>	yes
A and B	DNA Metabolism	no subcategory	Restriction-Modification System	Type I restriction-modification system, DNA-methyltransferase subunit M (EC 2.1.1.72)	<a href=&#39;?page=Annotation&feature=fig|6666666.640606.peg.2257&#39; target=_blank>fig|6666666.640606.peg.2257</a>	yes	<a href=&#39;?page=Annotation&feature=fig|6666666.640605.peg.1190&#39; target=_blank>fig|6666666.640605.peg.1190</a>, <a href=&#39;?page=Annotation&feature=fig|6666666.640605.peg.1192&#39; target=_blank>fig|6666666.640605.peg.1192</a>, <a href=&#39;?page=Annotation&feature=fig|6666666.640605.peg.2724&#39; target=_blank>fig|6666666.640605.peg.2724</a>	yes
A and B	DNA Metabolism	no subcategory	Restriction-Modification System	Type I restriction-modification system, restriction subunit R (EC 3.1.21.3)	<a href=&#39;?page=Annotation&feature=fig|6666666.640606.peg.2253&#39; target=_blank>fig|6666666.640606.peg.2253</a>, <a href=&#39;?page=Annotation&feature=fig|6666666.640606.peg.2258&#39; target=_blank>fig|6666666.640606.peg.2258</a>	yes	<a href=&#39;?page=Annotation&feature=fig|6666666.640605.peg.1179&#39; target=_blank>fig|6666666.640605.peg.1179</a>, <a href=&#39;?page=Annotation&feature=fig|6666666.640605.peg.2727&#39; target=_blank>fig|6666666.640605.peg.2727</a>	yes
A and B	DNA Metabolism	no subcategory	Type I Restriction-Modification	Type I restriction-modification system, DNA-methyltransferase subunit M (EC 2.1.1.72)	<a href=&#39;?page=Annotation&feature=fig|6666666.640606.peg.2257&#39; target=_blank>fig|6666666.640606.peg.2257</a>	yes	<a href=&#39;?page=Annotation&feature=fig|6666666.640605.peg.1190&#39; target=_blank>fig|6666666.640605.peg.1190</a>, <a href=&#39;?page=Annotation&feature=fig|6666666.640605.peg.1192&#39; target=_blank>fig|6666666.640605.peg.1192</a>, <a href=&#39;?page=Annotation&feature=fig|6666666.640605.peg.2724&#39; target=_blank>fig|6666666.640605.peg.2724</a>	yes
A and B	DNA Metabolism	no subcategory	Type I Restriction-Modification	Type I restriction-modification system, restriction subunit R (EC 3.1.21.3)	<a href=&#39;?page=Annotation&feature=fig|6666666.640606.peg.2253&#39; target=_blank>fig|6666666.640606.peg.2253</a>, <a href=&#39;?page=Annotation&feature=fig|6666666.640606.peg.2258&#39; target=_blank>fig|6666666.640606.peg.2258</a>	yes	<a href=&#39;?page=Annotation&feature=fig|6666666.640605.peg.1179&#39; target=_blank>fig|6666666.640605.peg.1179</a>, <a href=&#39;?page=Annotation&feature=fig|6666666.640605.peg.2727&#39; target=_blank>fig|6666666.640605.peg.2727</a>	yes
A	DNA Metabolism	no subcategory	DNA ligases	ATP-dependent DNA ligase (EC 6.5.1.1) LigC	<a href=&#39;?page=Annotation&feature=fig|6666666.640606.peg.676&#39; target=_blank>fig|6666666.640606.peg.676</a>	yes	<input type=&#39;button&#39; class=&#39;button&#39; value=&#39;find&#39; onclick=&#39;window.open("?page=SearchGene&fr=ATP-dependent DNA ligase (EC 6.5.1.1) LigC&organism=6666666.640605&subsystem=DNA_ligases&template_gene=fig|6666666.640606.peg.676");&#39;>	no
A and B	Dormancy and Sporulation	no subcategory	Sporulation-associated proteins with broader functions	Peptidyl-tRNA hydrolase (EC 3.1.1.29)	<a href=&#39;?page=Annotation&feature=fig|6666666.640606.peg.3655&#39; target=_blank>fig|6666666.640606.peg.3655</a>	yes	<a href=&#39;?page=Annotation&feature=fig|6666666.640605.peg.3835&#39; target=_blank>fig|6666666.640605.peg.3835</a>	yes
A and B	Fatty Acids, Lipids, and Isoprenoids	Fatty acids	Fatty Acid Biosynthesis FASII	3-hydroxyacyl-[acyl-carrier-protein] dehydratase, FabZ form (EC 4.2.1.59)	<a href=&#39;?page=Annotation&feature=fig|6666666.640606.peg.2715&#39; target=_blank>fig|6666666.640606.peg.2715</a>	yes	<a href=&#39;?page=Annotation&feature=fig|6666666.640605.peg.3856&#39; target=_blank>fig|6666666.640605.peg.3856</a>	yes
A and B	Fatty Acids, Lipids, and Isoprenoids	Fatty acids	Fatty Acid Biosynthesis FASII	Acetyl-coenzyme A carboxyl transferase alpha chain (EC 6.4.1.2)	<a href=&#39;?page=Annotation&feature=fig|6666666.640606.peg.3623&#39; target=_blank>fig|6666666.640606.peg.3623</a>	yes	<a href=&#39;?page=Annotation&feature=fig|6666666.640605.peg.1614&#39; target=_blank>fig|6666666.640605.peg.1614</a>	yes
A and B	Fatty Acids, Lipids, and Isoprenoids	Fatty acids	Fatty Acid Biosynthesis FASII	Acetyl-coenzyme A carboxyl transferase beta chain (EC 6.4.1.2)	<a href=&#39;?page=Annotation&feature=fig|6666666.640606.peg.1341&#39; target=_blank>fig|6666666.640606.peg.1341</a>	yes	<a href=&#39;?page=Annotation&feature=fig|6666666.640605.peg.3372&#39; target=_blank>fig|6666666.640605.peg.3372</a>	yes
A and B	Fatty Acids, Lipids, and Isoprenoids	Fatty acids	Fatty Acid Biosynthesis FASII	Acyl carrier protein	<a href=&#39;?page=Annotation&feature=fig|6666666.640606.peg.486&#39; target=_blank>fig|6666666.640606.peg.486</a>	yes	<a href=&#39;?page=Annotation&feature=fig|6666666.640605.peg.125&#39; target=_blank>fig|6666666.640605.peg.125</a>	yes
A and B	Fatty Acids, Lipids, and Isoprenoids	Fatty acids	Fatty Acid Biosynthesis FASII	Acyl carrier protein phosphodiesterase (EC 3.1.4.14)	<a href=&#39;?page=Annotation&feature=fig|6666666.640606.peg.2702&#39; target=_blank>fig|6666666.640606.peg.2702</a>	yes	<a href=&#39;?page=Annotation&feature=fig|6666666.640605.peg.3843&#39; target=_blank>fig|6666666.640605.peg.3843</a>	yes
A and B	Fatty Acids, Lipids, and Isoprenoids	Fatty acids	Fatty Acid Biosynthesis FASII	Biotin carboxyl carrier protein	<a href=&#39;?page=Annotation&feature=fig|6666666.640606.peg.1612&#39; target=_blank>fig|6666666.640606.peg.1612</a>	yes	<a href=&#39;?page=Annotation&feature=fig|6666666.640605.peg.3626&#39; target=_blank>fig|6666666.640605.peg.3626</a>	yes
A and B	Fatty Acids, Lipids, and Isoprenoids	Fatty acids	Fatty Acid Biosynthesis FASII	Biotin carboxyl carrier protein of acetyl-CoA carboxylase	<a href=&#39;?page=Annotation&feature=fig|6666666.640606.peg.3245&#39; target=_blank>fig|6666666.640606.peg.3245</a>	yes	<a href=&#39;?page=Annotation&feature=fig|6666666.640605.peg.26&#39; target=_blank>fig|6666666.640605.peg.26</a>	yes
A and B	Fatty Acids, Lipids, and Isoprenoids	Fatty acids	Fatty Acid Biosynthesis FASII	Biotin carboxylase of acetyl-CoA carboxylase (EC 6.3.4.14)	<a href=&#39;?page=Annotation&feature=fig|6666666.640606.peg.3244&#39; target=_blank>fig|6666666.640606.peg.3244</a>	yes	<a href=&#39;?page=Annotation&feature=fig|6666666.640605.peg.27&#39; target=_blank>fig|6666666.640605.peg.27</a>	yes
A and B	Fatty Acids, Lipids, and Isoprenoids	Fatty acids	Fatty Acid Biosynthesis FASII	Enoyl-[acyl-carrier-protein] reductase [NADH] (EC 1.3.1.9)	<a href=&#39;?page=Annotation&feature=fig|6666666.640606.peg.1682&#39; target=_blank>fig|6666666.640606.peg.1682</a>	yes	<a href=&#39;?page=Annotation&feature=fig|6666666.640605.peg.3696&#39; target=_blank>fig|6666666.640605.peg.3696</a>	yes
A and B	Fatty Acids, Lipids, and Isoprenoids	Fatty acids	Fatty Acid Biosynthesis FASII	Malonyl CoA-acyl carrier protein transacylase (EC 2.3.1.39)	<a href=&#39;?page=Annotation&feature=fig|6666666.640606.peg.84&#39; target=_blank>fig|6666666.640606.peg.84</a>	yes	<a href=&#39;?page=Annotation&feature=fig|6666666.640605.peg.993&#39; target=_blank>fig|6666666.640605.peg.993</a>	yes
B	Fatty Acids, Lipids, and Isoprenoids	Fatty acids	Fatty Acid Biosynthesis FASII	3-oxoacyl-[acyl-carrier protein] reductase (EC 1.1.1.100)	<input type=&#39;button&#39; value=&#39;find&#39; onclick=&#39;window.open("?page=SearchGene&fr=3-oxoacyl-[acyl-carrier protein] reductase (EC 1.1.1.100)&organism=6666666.640606&subsystem=Fatty_Acid_Biosynthesis_FASII&template_gene=fig|6666666.640605.peg.3470");&#39;>	no	<a href=&#39;?page=Annotation&feature=fig|6666666.640605.peg.3470&#39; target=_blank>fig|6666666.640605.peg.3470</a>	yes
A and B	Fatty Acids, Lipids, and Isoprenoids	Isoprenoids	Isoprenoinds for Quinones	Geranylgeranyl diphosphate synthase (EC 2.5.1.29)	<a href=&#39;?page=Annotation&feature=fig|6666666.640606.peg.3469&#39; target=_blank>fig|6666666.640606.peg.3469</a>	yes	<a href=&#39;?page=Annotation&feature=fig|6666666.640605.peg.3140&#39; target=_blank>fig|6666666.640605.peg.3140</a>	yes
A and B	Fatty Acids, Lipids, and Isoprenoids	Isoprenoids	Isoprenoinds for Quinones	Undecaprenyl diphosphate synthase (EC 2.5.1.31)	<a href=&#39;?page=Annotation&feature=fig|6666666.640606.peg.1354&#39; target=_blank>fig|6666666.640606.peg.1354</a>	yes	<a href=&#39;?page=Annotation&feature=fig|6666666.640605.peg.3383&#39; target=_blank>fig|6666666.640605.peg.3383</a>	yes
A and B	Fatty Acids, Lipids, and Isoprenoids	Isoprenoids	Nonmevalonate Branch of Isoprenoid Biosynthesis	1-deoxy-D-xylulose 5-phosphate reductoisomerase (EC 1.1.1.267)	<a href=&#39;?page=Annotation&feature=fig|6666666.640606.peg.3097&#39; target=_blank>fig|6666666.640606.peg.3097</a>	yes	<a href=&#39;?page=Annotation&feature=fig|6666666.640605.peg.1363&#39; target=_blank>fig|6666666.640605.peg.1363</a>	yes
A and B	Fatty Acids, Lipids, and Isoprenoids	Isoprenoids	Nonmevalonate Branch of Isoprenoid Biosynthesis	1-deoxy-D-xylulose 5-phosphate synthase (EC 2.2.1.7)	<a href=&#39;?page=Annotation&feature=fig|6666666.640606.peg.1208&#39; target=_blank>fig|6666666.640606.peg.1208</a>	yes	<a href=&#39;?page=Annotation&feature=fig|6666666.640605.peg.781&#39; target=_blank>fig|6666666.640605.peg.781</a>	yes
A and B	Fatty Acids, Lipids, and Isoprenoids	Isoprenoids	Nonmevalonate Branch of Isoprenoid Biosynthesis	2-C-methyl-D-erythritol 2,4-cyclodiphosphate synthase (EC 4.6.1.12)	<a href=&#39;?page=Annotation&feature=fig|6666666.640606.peg.937&#39; target=_blank>fig|6666666.640606.peg.937</a>	yes	<a href=&#39;?page=Annotation&feature=fig|6666666.640605.peg.2070&#39; target=_blank>fig|6666666.640605.peg.2070</a>	yes
A and B	Fatty Acids, Lipids, and Isoprenoids	Isoprenoids	Nonmevalonate Branch of Isoprenoid Biosynthesis	2-C-methyl-D-erythritol 4-phosphate cytidylyltransferase (EC 2.7.7.60)	<a href=&#39;?page=Annotation&feature=fig|6666666.640606.peg.2876&#39; target=_blank>fig|6666666.640606.peg.2876</a>	yes	<a href=&#39;?page=Annotation&feature=fig|6666666.640605.peg.3058&#39; target=_blank>fig|6666666.640605.peg.3058</a>	yes
A and B	Fatty Acids, Lipids, and Isoprenoids	Isoprenoids	Nonmevalonate Branch of Isoprenoid Biosynthesis	4-diphosphocytidyl-2-C-methyl-D-erythritol kinase (EC 2.7.1.148)	<a href=&#39;?page=Annotation&feature=fig|6666666.640606.peg.2940&#39; target=_blank>fig|6666666.640606.peg.2940</a>	yes	<a href=&#39;?page=Annotation&feature=fig|6666666.640605.peg.1941&#39; target=_blank>fig|6666666.640605.peg.1941</a>	yes
A	Fatty Acids, Lipids, and Isoprenoids	Phospholipids	Glycerolipid and Glycerophospholipid Metabolism in Bacteria	1-acyl-sn-glycerol-3-phosphate acyltransferase (EC 2.3.1.51)	<a href=&#39;?page=Annotation&feature=fig|6666666.640606.peg.3039&#39; target=_blank>fig|6666666.640606.peg.3039</a>	yes	<input type=&#39;button&#39; class=&#39;button&#39; value=&#39;find&#39; onclick=&#39;window.open("?page=SearchGene&fr=1-acyl-sn-glycerol-3-phosphate acyltransferase (EC 2.3.1.51)&organism=6666666.640605&subsystem=Glycerolipid_and_Glycerophospholipid_Metabolism_in_Bacteria&template_gene=fig|6666666.640606.peg.3039");&#39;>	no
A and B	Fatty Acids, Lipids, and Isoprenoids	Triacylglycerols	Triacylglycerol metabolism	Lysophospholipase (EC 3.1.1.5)	<a href=&#39;?page=Annotation&feature=fig|6666666.640606.peg.3154&#39; target=_blank>fig|6666666.640606.peg.3154</a>	yes	<a href=&#39;?page=Annotation&feature=fig|6666666.640605.peg.2267&#39; target=_blank>fig|6666666.640605.peg.2267</a>	yes
A and B	Fatty Acids, Lipids, and Isoprenoids	Triacylglycerols	Triacylglycerol metabolism	Monoglyceride lipase (EC 3.1.1.23)	<a href=&#39;?page=Annotation&feature=fig|6666666.640606.peg.3154&#39; target=_blank>fig|6666666.640606.peg.3154</a>	yes	<a href=&#39;?page=Annotation&feature=fig|6666666.640605.peg.2267&#39; target=_blank>fig|6666666.640605.peg.2267</a>	yes
A and B	Fatty Acids, Lipids, and Isoprenoids	no subcategory	Polyhydroxybutyrate metabolism	3-hydroxyacyl-CoA dehydrogenase (EC 1.1.1.35)	<a href=&#39;?page=Annotation&feature=fig|6666666.640606.peg.2270&#39; target=_blank>fig|6666666.640606.peg.2270</a>	yes	<a href=&#39;?page=Annotation&feature=fig|6666666.640605.peg.1676&#39; target=_blank>fig|6666666.640605.peg.1676</a>	yes
A and B	Fatty Acids, Lipids, and Isoprenoids	no subcategory	Polyhydroxybutyrate metabolism	3-hydroxybutyryl-CoA dehydrogenase (EC 1.1.1.157)	<a href=&#39;?page=Annotation&feature=fig|6666666.640606.peg.2242&#39; target=_blank>fig|6666666.640606.peg.2242</a>, <a href=&#39;?page=Annotation&feature=fig|6666666.640606.peg.2270&#39; target=_blank>fig|6666666.640606.peg.2270</a>	yes	<a href=&#39;?page=Annotation&feature=fig|6666666.640605.peg.1676&#39; target=_blank>fig|6666666.640605.peg.1676</a>, <a href=&#39;?page=Annotation&feature=fig|6666666.640605.peg.1740&#39; target=_blank>fig|6666666.640605.peg.1740</a>	yes
A and B	Fatty Acids, Lipids, and Isoprenoids	no subcategory	Polyhydroxybutyrate metabolism	Acetyl-CoA acetyltransferase (EC 2.3.1.9)	<a href=&#39;?page=Annotation&feature=fig|6666666.640606.peg.629&#39; target=_blank>fig|6666666.640606.peg.629</a>	yes	<a href=&#39;?page=Annotation&feature=fig|6666666.640605.peg.2624&#39; target=_blank>fig|6666666.640605.peg.2624</a>	yes
A and B	Fatty Acids, Lipids, and Isoprenoids	no subcategory	Polyhydroxybutyrate metabolism	Enoyl-CoA hydratase (EC 4.2.1.17)	<a href=&#39;?page=Annotation&feature=fig|6666666.640606.peg.431&#39; target=_blank>fig|6666666.640606.peg.431</a>, <a href=&#39;?page=Annotation&feature=fig|6666666.640606.peg.2902&#39; target=_blank>fig|6666666.640606.peg.2902</a>	yes	<a href=&#39;?page=Annotation&feature=fig|6666666.640605.peg.981&#39; target=_blank>fig|6666666.640605.peg.981</a>, <a href=&#39;?page=Annotation&feature=fig|6666666.640605.peg.1472&#39; target=_blank>fig|6666666.640605.peg.1472</a>	yes
B	Iron acquisition and metabolism	no subcategory	Hemin transport system	Ferric siderophore transport system, periplasmic binding protein TonB	<input type=&#39;button&#39; value=&#39;find&#39; onclick=&#39;window.open("?page=SearchGene&fr=Ferric siderophore transport system, periplasmic binding protein TonB&organism=6666666.640606&subsystem=Hemin_transport_system&template_gene=fig|6666666.640605.peg.1457");&#39;>	no	<a href=&#39;?page=Annotation&feature=fig|6666666.640605.peg.1457&#39; target=_blank>fig|6666666.640605.peg.1457</a>, <a href=&#39;?page=Annotation&feature=fig|6666666.640605.peg.2633&#39; target=_blank>fig|6666666.640605.peg.2633</a>	yes
B	Membrane Transport	ABC transporters	ABC transporter oligopeptide (TC 3.A.1.5.1)	Oligopeptide transport system permease protein OppB (TC 3.A.1.5.1)	<input type=&#39;button&#39; value=&#39;find&#39; onclick=&#39;window.open("?page=SearchGene&fr=Oligopeptide transport system permease protein OppB (TC 3.A.1.5.1)&organism=6666666.640606&subsystem=ABC_transporter_oligopeptide_(TC_3.A.1.5.1)&template_gene=fig|6666666.640605.peg.2260");&#39;>	no	<a href=&#39;?page=Annotation&feature=fig|6666666.640605.peg.2260&#39; target=_blank>fig|6666666.640605.peg.2260</a>	yes
A and B	Membrane Transport	Cation transporters	Copper Transport System	Copper-translocating P-type ATPase (EC 3.6.3.4)	<a href=&#39;?page=Annotation&feature=fig|6666666.640606.peg.567&#39; target=_blank>fig|6666666.640606.peg.567</a>, <a href=&#39;?page=Annotation&feature=fig|6666666.640606.peg.2322&#39; target=_blank>fig|6666666.640606.peg.2322</a>, <a href=&#39;?page=Annotation&feature=fig|6666666.640606.peg.2734&#39; target=_blank>fig|6666666.640606.peg.2734</a>	yes	<a href=&#39;?page=Annotation&feature=fig|6666666.640605.peg.2663&#39; target=_blank>fig|6666666.640605.peg.2663</a>, <a href=&#39;?page=Annotation&feature=fig|6666666.640605.peg.3874&#39; target=_blank>fig|6666666.640605.peg.3874</a>	yes
A and B	Membrane Transport	Cation transporters	Magnesium transport	Magnesium and cobalt transport protein CorA	<a href=&#39;?page=Annotation&feature=fig|6666666.640606.peg.1952&#39; target=_blank>fig|6666666.640606.peg.1952</a>	yes	<a href=&#39;?page=Annotation&feature=fig|6666666.640605.peg.1726&#39; target=_blank>fig|6666666.640605.peg.1726</a>	yes
A and B	Membrane Transport	Protein translocation across cytoplasmic membrane	Twin-arginine translocation system	Twin-arginine translocation protein TatA	<a href=&#39;?page=Annotation&feature=fig|6666666.640606.peg.426&#39; target=_blank>fig|6666666.640606.peg.426</a>	yes	<a href=&#39;?page=Annotation&feature=fig|6666666.640605.peg.1467&#39; target=_blank>fig|6666666.640605.peg.1467</a>	yes
A and B	Membrane Transport	Protein translocation across cytoplasmic membrane	Twin-arginine translocation system	Twin-arginine translocation protein TatC	<a href=&#39;?page=Annotation&feature=fig|6666666.640606.peg.1996&#39; target=_blank>fig|6666666.640606.peg.1996</a>	yes	<a href=&#39;?page=Annotation&feature=fig|6666666.640605.peg.741&#39; target=_blank>fig|6666666.640605.peg.741</a>	yes
A and B	Membrane Transport	TRAP transporters	TRAP Transporter collection	TRAP-type C4-dicarboxylate transport system, large permease component	<a href=&#39;?page=Annotation&feature=fig|6666666.640606.peg.2843&#39; target=_blank>fig|6666666.640606.peg.2843</a>	yes	<a href=&#39;?page=Annotation&feature=fig|6666666.640605.peg.3002&#39; target=_blank>fig|6666666.640605.peg.3002</a>	yes
A and B	Membrane Transport	TRAP transporters	TRAP Transporter collection	TRAP-type C4-dicarboxylate transport system, periplasmic component	<a href=&#39;?page=Annotation&feature=fig|6666666.640606.peg.2845&#39; target=_blank>fig|6666666.640606.peg.2845</a>	yes	<a href=&#39;?page=Annotation&feature=fig|6666666.640605.peg.3004&#39; target=_blank>fig|6666666.640605.peg.3004</a>	yes
A and B	Membrane Transport	Uni- Sym- and Antiporters	NhaA, NhaD and Sodium-dependent phosphate transporters	Sodium-dependent phosphate transporter	<a href=&#39;?page=Annotation&feature=fig|6666666.640606.peg.1270&#39; target=_blank>fig|6666666.640606.peg.1270</a>, <a href=&#39;?page=Annotation&feature=fig|6666666.640606.peg.2393&#39; target=_blank>fig|6666666.640606.peg.2393</a>	yes	<a href=&#39;?page=Annotation&feature=fig|6666666.640605.peg.3294&#39; target=_blank>fig|6666666.640605.peg.3294</a>	yes
A and B	Metabolism of Aromatic Compounds	Metabolism of central aromatic intermediates	Catechol branch of beta-ketoadipate pathway	Beta-ketoadipate enol-lactone hydrolase (EC 3.1.1.24)	<a href=&#39;?page=Annotation&feature=fig|6666666.640606.peg.1684&#39; target=_blank>fig|6666666.640606.peg.1684</a>	yes	<a href=&#39;?page=Annotation&feature=fig|6666666.640605.peg.3699&#39; target=_blank>fig|6666666.640605.peg.3699</a>	yes
A and B	Metabolism of Aromatic Compounds	Metabolism of central aromatic intermediates	Catechol branch of beta-ketoadipate pathway	Succinyl-CoA:3-ketoacid-coenzyme A transferase subunit A (EC 2.8.3.5)	<a href=&#39;?page=Annotation&feature=fig|6666666.640606.peg.895&#39; target=_blank>fig|6666666.640606.peg.895</a>	yes	<a href=&#39;?page=Annotation&feature=fig|6666666.640605.peg.1758&#39; target=_blank>fig|6666666.640605.peg.1758</a>	yes
A and B	Metabolism of Aromatic Compounds	Metabolism of central aromatic intermediates	Catechol branch of beta-ketoadipate pathway	Succinyl-CoA:3-ketoacid-coenzyme A transferase subunit B (EC 2.8.3.5)	<a href=&#39;?page=Annotation&feature=fig|6666666.640606.peg.896&#39; target=_blank>fig|6666666.640606.peg.896</a>	yes	<a href=&#39;?page=Annotation&feature=fig|6666666.640605.peg.1757&#39; target=_blank>fig|6666666.640605.peg.1757</a>	yes
A and B	Metabolism of Aromatic Compounds	Metabolism of central aromatic intermediates	Homogentisate pathway of aromatic compound degradation	4-hydroxyphenylpyruvate dioxygenase (EC 1.13.11.27)	<a href=&#39;?page=Annotation&feature=fig|6666666.640606.peg.2194&#39; target=_blank>fig|6666666.640606.peg.2194</a>	yes	<a href=&#39;?page=Annotation&feature=fig|6666666.640605.peg.1710&#39; target=_blank>fig|6666666.640605.peg.1710</a>	yes
A and B	Metabolism of Aromatic Compounds	Metabolism of central aromatic intermediates	Homogentisate pathway of aromatic compound degradation	Fumarylacetoacetase (EC 3.7.1.2)	<a href=&#39;?page=Annotation&feature=fig|6666666.640606.peg.2681&#39; target=_blank>fig|6666666.640606.peg.2681</a>	yes	<a href=&#39;?page=Annotation&feature=fig|6666666.640605.peg.3798&#39; target=_blank>fig|6666666.640605.peg.3798</a>	yes
A and B	Metabolism of Aromatic Compounds	Metabolism of central aromatic intermediates	Homogentisate pathway of aromatic compound degradation	Homogentisate 1,2-dioxygenase (EC 1.13.11.5)	<a href=&#39;?page=Annotation&feature=fig|6666666.640606.peg.3424&#39; target=_blank>fig|6666666.640606.peg.3424</a>	yes	<a href=&#39;?page=Annotation&feature=fig|6666666.640605.peg.3110&#39; target=_blank>fig|6666666.640605.peg.3110</a>	yes
A and B	Metabolism of Aromatic Compounds	Metabolism of central aromatic intermediates	Salicylate and gentisate catabolism	Fumarylacetoacetase (EC 3.7.1.2)	<a href=&#39;?page=Annotation&feature=fig|6666666.640606.peg.2681&#39; target=_blank>fig|6666666.640606.peg.2681</a>	yes	<a href=&#39;?page=Annotation&feature=fig|6666666.640605.peg.3798&#39; target=_blank>fig|6666666.640605.peg.3798</a>	yes
A and B	Metabolism of Aromatic Compounds	Metabolism of central aromatic intermediates	Salicylate and gentisate catabolism	Fumarylacetoacetate hydrolase family protein	<a href=&#39;?page=Annotation&feature=fig|6666666.640606.peg.1900&#39; target=_blank>fig|6666666.640606.peg.1900</a>, <a href=&#39;?page=Annotation&feature=fig|6666666.640606.peg.2439&#39; target=_blank>fig|6666666.640606.peg.2439</a>	yes	<a href=&#39;?page=Annotation&feature=fig|6666666.640605.peg.802&#39; target=_blank>fig|6666666.640605.peg.802</a>, <a href=&#39;?page=Annotation&feature=fig|6666666.640605.peg.2786&#39; target=_blank>fig|6666666.640605.peg.2786</a>	yes
A and B	Metabolism of Aromatic Compounds	Peripheral pathways for catabolism of aromatic compounds	Quinate degradation	3-dehydroquinate dehydratase II (EC 4.2.1.10)	<a href=&#39;?page=Annotation&feature=fig|6666666.640606.peg.1597&#39; target=_blank>fig|6666666.640606.peg.1597</a>	yes	<a href=&#39;?page=Annotation&feature=fig|6666666.640605.peg.2118&#39; target=_blank>fig|6666666.640605.peg.2118</a>	yes
A and B	Metabolism of Aromatic Compounds	no subcategory	Gentisate degradation	Fumarylacetoacetate hydrolase family protein	<a href=&#39;?page=Annotation&feature=fig|6666666.640606.peg.1900&#39; target=_blank>fig|6666666.640606.peg.1900</a>, <a href=&#39;?page=Annotation&feature=fig|6666666.640606.peg.2439&#39; target=_blank>fig|6666666.640606.peg.2439</a>	yes	<a href=&#39;?page=Annotation&feature=fig|6666666.640605.peg.802&#39; target=_blank>fig|6666666.640605.peg.802</a>, <a href=&#39;?page=Annotation&feature=fig|6666666.640605.peg.2786&#39; target=_blank>fig|6666666.640605.peg.2786</a>	yes
A and B	Miscellaneous	Plant-Prokaryote DOE project	Iron-sulfur cluster assembly	Cysteine desulfurase (EC 2.8.1.7)	<a href=&#39;?page=Annotation&feature=fig|6666666.640606.peg.852&#39; target=_blank>fig|6666666.640606.peg.852</a>, <a href=&#39;?page=Annotation&feature=fig|6666666.640606.peg.875&#39; target=_blank>fig|6666666.640606.peg.875</a>, <a href=&#39;?page=Annotation&feature=fig|6666666.640606.peg.1817&#39; target=_blank>fig|6666666.640606.peg.1817</a>, <a href=&#39;?page=Annotation&feature=fig|6666666…	yes	<a href=&#39;?page=Annotation&feature=fig|6666666.640605.peg.284&#39; target=_blank>fig|6666666.640605.peg.284</a>, <a href=&#39;?page=Annotation&feature=fig|6666666.640605.peg.1779&#39; target=_blank>fig|6666666.640605.peg.1779</a>, <a href=&#39;?page=Annotation&feature=fig|6666666.640605.peg.1799&#39; target=_blank>fig|6666666.640605.peg.1799</a>, <a href=&#39;?page=Annotation&feature=fig|66666…	yes
A and B	Miscellaneous	Plant-Prokaryote DOE project	Iron-sulfur cluster assembly	Ferredoxin, 2Fe-2S	<a href=&#39;?page=Annotation&feature=fig|6666666.640606.peg.1326&#39; target=_blank>fig|6666666.640606.peg.1326</a>, <a href=&#39;?page=Annotation&feature=fig|6666666.640606.peg.3088&#39; target=_blank>fig|6666666.640606.peg.3088</a>	yes	<a href=&#39;?page=Annotation&feature=fig|6666666.640605.peg.1158&#39; target=_blank>fig|6666666.640605.peg.1158</a>, <a href=&#39;?page=Annotation&feature=fig|6666666.640605.peg.3357&#39; target=_blank>fig|6666666.640605.peg.3357</a>	yes
A and B	Miscellaneous	Plant-Prokaryote DOE project	Iron-sulfur cluster assembly	Iron-sulfur cluster assembly ATPase protein SufC	<a href=&#39;?page=Annotation&feature=fig|6666666.640606.peg.2605&#39; target=_blank>fig|6666666.640606.peg.2605</a>, <a href=&#39;?page=Annotation&feature=fig|6666666.640606.peg.3598&#39; target=_blank>fig|6666666.640606.peg.3598</a>	yes	<a href=&#39;?page=Annotation&feature=fig|6666666.640605.peg.198&#39; target=_blank>fig|6666666.640605.peg.198</a>, <a href=&#39;?page=Annotation&feature=fig|6666666.640605.peg.2301&#39; target=_blank>fig|6666666.640605.peg.2301</a>	yes
A and B	Miscellaneous	Plant-Prokaryote DOE project	Iron-sulfur cluster assembly	Iron-sulfur cluster assembly protein SufB	<a href=&#39;?page=Annotation&feature=fig|6666666.640606.peg.2604&#39; target=_blank>fig|6666666.640606.peg.2604</a>	yes	<a href=&#39;?page=Annotation&feature=fig|6666666.640605.peg.2302&#39; target=_blank>fig|6666666.640605.peg.2302</a>	yes
A and B	Miscellaneous	Plant-Prokaryote DOE project	Iron-sulfur cluster assembly	Iron-sulfur cluster assembly protein SufD	<a href=&#39;?page=Annotation&feature=fig|6666666.640606.peg.2606&#39; target=_blank>fig|6666666.640606.peg.2606</a>	yes	<a href=&#39;?page=Annotation&feature=fig|6666666.640605.peg.2300&#39; target=_blank>fig|6666666.640605.peg.2300</a>	yes
A and B	Miscellaneous	Plant-Prokaryote DOE project	Iron-sulfur cluster assembly	Nitric oxide-dependent regulator DnrN or NorA	<a href=&#39;?page=Annotation&feature=fig|6666666.640606.peg.284&#39; target=_blank>fig|6666666.640606.peg.284</a>	yes	<a href=&#39;?page=Annotation&feature=fig|6666666.640605.peg.1532&#39; target=_blank>fig|6666666.640605.peg.1532</a>	yes
A and B	Miscellaneous	Plant-Prokaryote DOE project	Iron-sulfur cluster assembly	PaaD-like protein (DUF59) involved in Fe-S cluster assembly	<a href=&#39;?page=Annotation&feature=fig|6666666.640606.peg.2609&#39; target=_blank>fig|6666666.640606.peg.2609</a>	yes	<a href=&#39;?page=Annotation&feature=fig|6666666.640605.peg.2297&#39; target=_blank>fig|6666666.640605.peg.2297</a>	yes
A and B	Miscellaneous	Plant-Prokaryote DOE project	Iron-sulfur cluster assembly	probable iron binding protein from the HesB_IscA_SufA family	<a href=&#39;?page=Annotation&feature=fig|6666666.640606.peg.2457&#39; target=_blank>fig|6666666.640606.peg.2457</a>, <a href=&#39;?page=Annotation&feature=fig|6666666.640606.peg.2472&#39; target=_blank>fig|6666666.640606.peg.2472</a>	yes	<a href=&#39;?page=Annotation&feature=fig|6666666.640605.peg.293&#39; target=_blank>fig|6666666.640605.peg.293</a>, <a href=&#39;?page=Annotation&feature=fig|6666666.640605.peg.303&#39; target=_blank>fig|6666666.640605.peg.303</a>	yes
A and B	Miscellaneous	Plant-Prokaryote DOE project	Single-Rhodanese-domain proteins	Rhodanese domain protein UPF0176, Firmicutes subgroup	<a href=&#39;?page=Annotation&feature=fig|6666666.640606.peg.1567&#39; target=_blank>fig|6666666.640606.peg.1567</a>	yes	<a href=&#39;?page=Annotation&feature=fig|6666666.640605.peg.523&#39; target=_blank>fig|6666666.640605.peg.523</a>	yes
A and B	Miscellaneous	no subcategory	Broadly distributed proteins not in subsystems	YpfJ protein, zinc metalloprotease superfamily	<a href=&#39;?page=Annotation&feature=fig|6666666.640606.peg.639&#39; target=_blank>fig|6666666.640606.peg.639</a>	yes	<a href=&#39;?page=Annotation&feature=fig|6666666.640605.peg.2975&#39; target=_blank>fig|6666666.640605.peg.2975</a>	yes
A and B	Miscellaneous	no subcategory	Muconate lactonizing enzyme family	O-succinylbenzoate synthase (EC 4.2.1.113)	<a href=&#39;?page=Annotation&feature=fig|6666666.640606.peg.2631&#39; target=_blank>fig|6666666.640606.peg.2631</a>	yes	<a href=&#39;?page=Annotation&feature=fig|6666666.640605.peg.2284&#39; target=_blank>fig|6666666.640605.peg.2284</a>	yes
A and B	Nitrogen Metabolism	Denitrification	Denitrifying reductase gene clusters	Nitrous oxide reductase maturation protein NosD	<a href=&#39;?page=Annotation&feature=fig|6666666.640606.peg.295&#39; target=_blank>fig|6666666.640606.peg.295</a>	yes	<a href=&#39;?page=Annotation&feature=fig|6666666.640605.peg.1548&#39; target=_blank>fig|6666666.640605.peg.1548</a>	yes
A and B	Nitrogen Metabolism	Denitrification	Denitrifying reductase gene clusters	Nitrous oxide reductase maturation protein NosF (ATPase)	<a href=&#39;?page=Annotation&feature=fig|6666666.640606.peg.296&#39; target=_blank>fig|6666666.640606.peg.296</a>	yes	<a href=&#39;?page=Annotation&feature=fig|6666666.640605.peg.1549&#39; target=_blank>fig|6666666.640605.peg.1549</a>	yes
A and B	Nitrogen Metabolism	Denitrification	Denitrifying reductase gene clusters	Nitrous oxide reductase maturation transmembrane protein NosY	<a href=&#39;?page=Annotation&feature=fig|6666666.640606.peg.297&#39; target=_blank>fig|6666666.640606.peg.297</a>	yes	<a href=&#39;?page=Annotation&feature=fig|6666666.640605.peg.1550&#39; target=_blank>fig|6666666.640605.peg.1550</a>	yes
A and B	Nitrogen Metabolism	Denitrification	Denitrifying reductase gene clusters	Nitrous-oxide reductase (EC 1.7.99.6)	<a href=&#39;?page=Annotation&feature=fig|6666666.640606.peg.292&#39; target=_blank>fig|6666666.640606.peg.292</a>	yes	<a href=&#39;?page=Annotation&feature=fig|6666666.640605.peg.1545&#39; target=_blank>fig|6666666.640605.peg.1545</a>	yes
A and B	Nitrogen Metabolism	no subcategory	Ammonia assimilation	Ammonium transporter	<a href=&#39;?page=Annotation&feature=fig|6666666.640606.peg.22&#39; target=_blank>fig|6666666.640606.peg.22</a>, <a href=&#39;?page=Annotation&feature=fig|6666666.640606.peg.1743&#39; target=_blank>fig|6666666.640606.peg.1743</a>	yes	<a href=&#39;?page=Annotation&feature=fig|6666666.640605.peg.919&#39; target=_blank>fig|6666666.640605.peg.919</a>, <a href=&#39;?page=Annotation&feature=fig|6666666.640605.peg.2112&#39; target=_blank>fig|6666666.640605.peg.2112</a>	yes
A and B	Nitrogen Metabolism	no subcategory	Ammonia assimilation	Ferredoxin-dependent glutamate synthase (EC 1.4.7.1)	<a href=&#39;?page=Annotation&feature=fig|6666666.640606.peg.811&#39; target=_blank>fig|6666666.640606.peg.811</a>	yes	<a href=&#39;?page=Annotation&feature=fig|6666666.640605.peg.1873&#39; target=_blank>fig|6666666.640605.peg.1873</a>	yes
A and B	Nitrogen Metabolism	no subcategory	Ammonia assimilation	Glutamate synthase [NADPH] large chain (EC 1.4.1.13)	<a href=&#39;?page=Annotation&feature=fig|6666666.640606.peg.1244&#39; target=_blank>fig|6666666.640606.peg.1244</a>	yes	<a href=&#39;?page=Annotation&feature=fig|6666666.640605.peg.3314&#39; target=_blank>fig|6666666.640605.peg.3314</a>	yes
A and B	Nitrogen Metabolism	no subcategory	Ammonia assimilation	Glutamate synthase [NADPH] small chain (EC 1.4.1.13)	<a href=&#39;?page=Annotation&feature=fig|6666666.640606.peg.1245&#39; target=_blank>fig|6666666.640606.peg.1245</a>	yes	<a href=&#39;?page=Annotation&feature=fig|6666666.640605.peg.3313&#39; target=_blank>fig|6666666.640605.peg.3313</a>	yes
A and B	Nitrogen Metabolism	no subcategory	Ammonia assimilation	Glutamine synthetase type III, GlnN (EC 6.3.1.2)	<a href=&#39;?page=Annotation&feature=fig|6666666.640606.peg.3357&#39; target=_blank>fig|6666666.640606.peg.3357</a>	yes	<a href=&#39;?page=Annotation&feature=fig|6666666.640605.peg.173&#39; target=_blank>fig|6666666.640605.peg.173</a>	yes
A and B	Nitrogen Metabolism	no subcategory	Ammonia assimilation	Nitrogen regulatory protein P-II	<a href=&#39;?page=Annotation&feature=fig|6666666.640606.peg.1742&#39; target=_blank>fig|6666666.640606.peg.1742</a>	yes	<a href=&#39;?page=Annotation&feature=fig|6666666.640605.peg.2111&#39; target=_blank>fig|6666666.640605.peg.2111</a>	yes
A and B	Nitrogen Metabolism	no subcategory	Nitrate and nitrite ammonification	Nitrite reductase probable [NAD(P)H] subunit (EC 1.7.1.4)	<a href=&#39;?page=Annotation&feature=fig|6666666.640606.peg.2352&#39; target=_blank>fig|6666666.640606.peg.2352</a>	yes	<a href=&#39;?page=Annotation&feature=fig|6666666.640605.peg.348&#39; target=_blank>fig|6666666.640605.peg.348</a>	yes
A and B	Nitrogen Metabolism	no subcategory	Nitrosative stress	Nitric oxide-dependent regulator DnrN or NorA	<a href=&#39;?page=Annotation&feature=fig|6666666.640606.peg.284&#39; target=_blank>fig|6666666.640606.peg.284</a>	yes	<a href=&#39;?page=Annotation&feature=fig|6666666.640605.peg.1532&#39; target=_blank>fig|6666666.640605.peg.1532</a>	yes
B	Nitrogen Metabolism	no subcategory	Nitrate and nitrite ammonification	Cytochrome c nitrite reductase, small subunit NrfH	<input type=&#39;button&#39; value=&#39;find&#39; onclick=&#39;window.open("?page=SearchGene&fr=Cytochrome c nitrite reductase, small subunit NrfH&organism=6666666.640606&subsystem=Nitrate_and_nitrite_ammonification&template_gene=fig|6666666.640605.peg.1425");&#39;>	no	<a href=&#39;?page=Annotation&feature=fig|6666666.640605.peg.1425&#39; target=_blank>fig|6666666.640605.peg.1425</a>	yes
B	Nitrogen Metabolism	no subcategory	Nitrate and nitrite ammonification	Cytochrome c552 precursor (EC 1.7.2.2)	<input type=&#39;button&#39; value=&#39;find&#39; onclick=&#39;window.open("?page=SearchGene&fr=Cytochrome c552 precursor (EC 1.7.2.2)&organism=6666666.640606&subsystem=Nitrate_and_nitrite_ammonification&template_gene=fig|6666666.640605.peg.1424");&#39;>	no	<a href=&#39;?page=Annotation&feature=fig|6666666.640605.peg.1424&#39; target=_blank>fig|6666666.640605.peg.1424</a>	yes
B	Nitrogen Metabolism	no subcategory	Nitrosative stress	Nitric-oxide reductase (EC 1.7.99.7), quinol-dependent	<input type=&#39;button&#39; value=&#39;find&#39; onclick=&#39;window.open("?page=SearchGene&fr=Nitric-oxide reductase (EC 1.7.99.7), quinol-dependent&organism=6666666.640606&subsystem=Nitrosative_stress&template_gene=fig|6666666.640605.peg.1540");&#39;>	no	<a href=&#39;?page=Annotation&feature=fig|6666666.640605.peg.1540&#39; target=_blank>fig|6666666.640605.peg.1540</a>	yes
A and B	Nucleosides and Nucleotides	Detoxification	Nucleoside triphosphate pyrophosphohydrolase MazG	Nucleoside triphosphate pyrophosphohydrolase MazG (EC 3.6.1.8)	<a href=&#39;?page=Annotation&feature=fig|6666666.640606.peg.1820&#39; target=_blank>fig|6666666.640606.peg.1820</a>	yes	<a href=&#39;?page=Annotation&feature=fig|6666666.640605.peg.2142&#39; target=_blank>fig|6666666.640605.peg.2142</a>	yes
A and B	Nucleosides and Nucleotides	Detoxification	Nudix proteins (nucleoside triphosphate hydrolases)	ADP-ribose pyrophosphatase (EC 3.6.1.13)	<a href=&#39;?page=Annotation&feature=fig|6666666.640606.peg.657&#39; target=_blank>fig|6666666.640606.peg.657</a>	yes	<a href=&#39;?page=Annotation&feature=fig|6666666.640605.peg.2584&#39; target=_blank>fig|6666666.640605.peg.2584</a>	yes
B	Nucleosides and Nucleotides	Detoxification	Nudix proteins (nucleoside triphosphate hydrolases)	Mutator mutT protein (7,8-dihydro-8-oxoguanine-triphosphatase) (EC 3.6.1.-)	<input type=&#39;button&#39; value=&#39;find&#39; onclick=&#39;window.open("?page=SearchGene&fr=Mutator mutT protein (7,8-dihydro-8-oxoguanine-triphosphatase) (EC 3.6.1.-)&organism=6666666.640606&subsystem=Nudix_proteins_(nucleoside_triphosphate_hydrolases)&template_gene=fig|6666666.640605.peg.1205");&#39;>	no	<a href=&#39;?page=Annotation&feature=fig|6666666.640605.peg.1205&#39; target=_blank>fig|6666666.640605.peg.1205</a>	yes
A and B	Nucleosides and Nucleotides	Purines	De Novo Purine Biosynthesis	Adenylosuccinate lyase (EC 4.3.2.2)	<a href=&#39;?page=Annotation&feature=fig|6666666.640606.peg.338&#39; target=_blank>fig|6666666.640606.peg.338</a>	yes	<a href=&#39;?page=Annotation&feature=fig|6666666.640605.peg.1576&#39; target=_blank>fig|6666666.640605.peg.1576</a>	yes
A and B	Nucleosides and Nucleotides	Purines	De Novo Purine Biosynthesis	Amidophosphoribosyltransferase (EC 2.4.2.14)	<a href=&#39;?page=Annotation&feature=fig|6666666.640606.peg.2688&#39; target=_blank>fig|6666666.640606.peg.2688</a>	yes	<a href=&#39;?page=Annotation&feature=fig|6666666.640605.peg.417&#39; target=_blank>fig|6666666.640605.peg.417</a>	yes
A and B	Nucleosides and Nucleotides	Purines	De Novo Purine Biosynthesis	IMP cyclohydrolase (EC 3.5.4.10)	<a href=&#39;?page=Annotation&feature=fig|6666666.640606.peg.167&#39; target=_blank>fig|6666666.640606.peg.167</a>	yes	<a href=&#39;?page=Annotation&feature=fig|6666666.640605.peg.1124&#39; target=_blank>fig|6666666.640605.peg.1124</a>	yes
A and B	Nucleosides and Nucleotides	Purines	De Novo Purine Biosynthesis	Phosphoribosylamine--glycine ligase (EC 6.3.4.13)	<a href=&#39;?page=Annotation&feature=fig|6666666.640606.peg.193&#39; target=_blank>fig|6666666.640606.peg.193</a>	yes	<a href=&#39;?page=Annotation&feature=fig|6666666.640605.peg.250&#39; target=_blank>fig|6666666.640605.peg.250</a>	yes
A and B	Nucleosides and Nucleotides	Purines	De Novo Purine Biosynthesis	Phosphoribosylaminoimidazole-succinocarboxamide synthase (EC 6.3.2.6)	<a href=&#39;?page=Annotation&feature=fig|6666666.640606.peg.627&#39; target=_blank>fig|6666666.640606.peg.627</a>	yes	<a href=&#39;?page=Annotation&feature=fig|6666666.640605.peg.2621&#39; target=_blank>fig|6666666.640605.peg.2621</a>	yes
A and B	Nucleosides and Nucleotides	Purines	De Novo Purine Biosynthesis	Phosphoribosylaminoimidazolecarboxamide formyltransferase (EC 2.1.2.3)	<a href=&#39;?page=Annotation&feature=fig|6666666.640606.peg.167&#39; target=_blank>fig|6666666.640606.peg.167</a>	yes	<a href=&#39;?page=Annotation&feature=fig|6666666.640605.peg.1124&#39; target=_blank>fig|6666666.640605.peg.1124</a>	yes
A and B	Nucleosides and Nucleotides	Purines	De Novo Purine Biosynthesis	Phosphoribosylformylglycinamidine cyclo-ligase (EC 6.3.3.1)	<a href=&#39;?page=Annotation&feature=fig|6666666.640606.peg.1548&#39; target=_blank>fig|6666666.640606.peg.1548</a>	yes	<a href=&#39;?page=Annotation&feature=fig|6666666.640605.peg.3441&#39; target=_blank>fig|6666666.640605.peg.3441</a>	yes
A and B	Nucleosides and Nucleotides	Purines	De Novo Purine Biosynthesis	Phosphoribosylformylglycinamidine synthase, glutamine amidotransferase subunit (EC 6.3.5.3)	<a href=&#39;?page=Annotation&feature=fig|6666666.640606.peg.2667&#39; target=_blank>fig|6666666.640606.peg.2667</a>	yes	<a href=&#39;?page=Annotation&feature=fig|6666666.640605.peg.465&#39; target=_blank>fig|6666666.640605.peg.465</a>	yes
A and B	Nucleosides and Nucleotides	Purines	De Novo Purine Biosynthesis	Phosphoribosylformylglycinamidine synthase, synthetase subunit (EC 6.3.5.3)	<a href=&#39;?page=Annotation&feature=fig|6666666.640606.peg.2667&#39; target=_blank>fig|6666666.640606.peg.2667</a>	yes	<a href=&#39;?page=Annotation&feature=fig|6666666.640605.peg.465&#39; target=_blank>fig|6666666.640605.peg.465</a>	yes
A and B	Nucleosides and Nucleotides	Purines	De Novo Purine Biosynthesis	Phosphoribosylglycinamide formyltransferase (EC 2.1.2.2)	<a href=&#39;?page=Annotation&feature=fig|6666666.640606.peg.170&#39; target=_blank>fig|6666666.640606.peg.170</a>	yes	<a href=&#39;?page=Annotation&feature=fig|6666666.640605.peg.1128&#39; target=_blank>fig|6666666.640605.peg.1128</a>	yes
A and B	Nucleosides and Nucleotides	Purines	De Novo Purine Biosynthesis	Ribose-phosphate pyrophosphokinase (EC 2.7.6.1)	<a href=&#39;?page=Annotation&feature=fig|6666666.640606.peg.3657&#39; target=_blank>fig|6666666.640606.peg.3657</a>	yes	<a href=&#39;?page=Annotation&feature=fig|6666666.640605.peg.3833&#39; target=_blank>fig|6666666.640605.peg.3833</a>	yes
A and B	Nucleosides and Nucleotides	Purines	GMP synthase	GMP synthase [glutamine-hydrolyzing], ATP pyrophosphatase subunit (EC 6.3.5.2)	<a href=&#39;?page=Annotation&feature=fig|6666666.640606.peg.2377&#39; target=_blank>fig|6666666.640606.peg.2377</a>	yes	<a href=&#39;?page=Annotation&feature=fig|6666666.640605.peg.375&#39; target=_blank>fig|6666666.640605.peg.375</a>	yes
A and B	Nucleosides and Nucleotides	Purines	GMP synthase	GMP synthase [glutamine-hydrolyzing], amidotransferase subunit (EC 6.3.5.2)	<a href=&#39;?page=Annotation&feature=fig|6666666.640606.peg.2377&#39; target=_blank>fig|6666666.640606.peg.2377</a>	yes	<a href=&#39;?page=Annotation&feature=fig|6666666.640605.peg.375&#39; target=_blank>fig|6666666.640605.peg.375</a>	yes
A and B	Nucleosides and Nucleotides	Purines	Purine Utilization	Guanine deaminase (EC 3.5.4.3)	<a href=&#39;?page=Annotation&feature=fig|6666666.640606.peg.3631&#39; target=_blank>fig|6666666.640606.peg.3631</a>	yes	<a href=&#39;?page=Annotation&feature=fig|6666666.640605.peg.3790&#39; target=_blank>fig|6666666.640605.peg.3790</a>	yes
A and B	Nucleosides and Nucleotides	Purines	Purine Utilization	Xanthine and CO dehydrogenases maturation factor, XdhC/CoxF family	<a href=&#39;?page=Annotation&feature=fig|6666666.640606.peg.850&#39; target=_blank>fig|6666666.640606.peg.850</a>	yes	<a href=&#39;?page=Annotation&feature=fig|6666666.640605.peg.1802&#39; target=_blank>fig|6666666.640605.peg.1802</a>	yes
A and B	Nucleosides and Nucleotides	Purines	Purine conversions	5&#39;-nucleotidase (EC 3.1.3.5)	<a href=&#39;?page=Annotation&feature=fig|6666666.640606.peg.2750&#39; target=_blank>fig|6666666.640606.peg.2750</a>	yes	<a href=&#39;?page=Annotation&feature=fig|6666666.640605.peg.1297&#39; target=_blank>fig|6666666.640605.peg.1297</a>	yes
A and B	Nucleosides and Nucleotides	Purines	Purine conversions	Adenine deaminase (EC 3.5.4.2)	<a href=&#39;?page=Annotation&feature=fig|6666666.640606.peg.2964&#39; target=_blank>fig|6666666.640606.peg.2964</a>	yes	<a href=&#39;?page=Annotation&feature=fig|6666666.640605.peg.1967&#39; target=_blank>fig|6666666.640605.peg.1967</a>	yes
A and B	Nucleosides and Nucleotides	Purines	Purine conversions	Adenylate kinase (EC 2.7.4.3)	<a href=&#39;?page=Annotation&feature=fig|6666666.640606.peg.2974&#39; target=_blank>fig|6666666.640606.peg.2974</a>	yes	<a href=&#39;?page=Annotation&feature=fig|6666666.640605.peg.1979&#39; target=_blank>fig|6666666.640605.peg.1979</a>	yes
A and B	Nucleosides and Nucleotides	Purines	Purine conversions	Adenylosuccinate lyase (EC 4.3.2.2)	<a href=&#39;?page=Annotation&feature=fig|6666666.640606.peg.338&#39; target=_blank>fig|6666666.640606.peg.338</a>	yes	<a href=&#39;?page=Annotation&feature=fig|6666666.640605.peg.1576&#39; target=_blank>fig|6666666.640605.peg.1576</a>	yes
A and B	Nucleosides and Nucleotides	Purines	Purine conversions	Adenylosuccinate synthetase (EC 6.3.4.4)	<a href=&#39;?page=Annotation&feature=fig|6666666.640606.peg.3117&#39; target=_blank>fig|6666666.640606.peg.3117</a>	yes	<a href=&#39;?page=Annotation&feature=fig|6666666.640605.peg.1281&#39; target=_blank>fig|6666666.640605.peg.1281</a>	yes
A and B	Nucleosides and Nucleotides	Purines	Purine conversions	Deoxyadenosine kinase (EC 2.7.1.76)	<a href=&#39;?page=Annotation&feature=fig|6666666.640606.peg.2243&#39; target=_blank>fig|6666666.640606.peg.2243</a>	yes	<a href=&#39;?page=Annotation&feature=fig|6666666.640605.peg.1739&#39; target=_blank>fig|6666666.640605.peg.1739</a>	yes
A and B	Nucleosides and Nucleotides	Purines	Purine conversions	Deoxyguanosine kinase (EC 2.7.1.113)	<a href=&#39;?page=Annotation&feature=fig|6666666.640606.peg.2243&#39; target=_blank>fig|6666666.640606.peg.2243</a>	yes	<a href=&#39;?page=Annotation&feature=fig|6666666.640605.peg.1739&#39; target=_blank>fig|6666666.640605.peg.1739</a>	yes
A and B	Nucleosides and Nucleotides	Purines	Purine conversions	GMP synthase [glutamine-hydrolyzing], ATP pyrophosphatase subunit (EC 6.3.5.2)	<a href=&#39;?page=Annotation&feature=fig|6666666.640606.peg.2377&#39; target=_blank>fig|6666666.640606.peg.2377</a>	yes	<a href=&#39;?page=Annotation&feature=fig|6666666.640605.peg.375&#39; target=_blank>fig|6666666.640605.peg.375</a>	yes
A and B	Nucleosides and Nucleotides	Purines	Purine conversions	GMP synthase [glutamine-hydrolyzing], amidotransferase subunit (EC 6.3.5.2)	<a href=&#39;?page=Annotation&feature=fig|6666666.640606.peg.2377&#39; target=_blank>fig|6666666.640606.peg.2377</a>	yes	<a href=&#39;?page=Annotation&feature=fig|6666666.640605.peg.375&#39; target=_blank>fig|6666666.640605.peg.375</a>	yes
A and B	Nucleosides and Nucleotides	Purines	Purine conversions	Guanine deaminase (EC 3.5.4.3)	<a href=&#39;?page=Annotation&feature=fig|6666666.640606.peg.3631&#39; target=_blank>fig|6666666.640606.peg.3631</a>	yes	<a href=&#39;?page=Annotation&feature=fig|6666666.640605.peg.3790&#39; target=_blank>fig|6666666.640605.peg.3790</a>	yes
A and B	Nucleosides and Nucleotides	Purines	Purine conversions	Guanylate kinase (EC 2.7.4.8)	<a href=&#39;?page=Annotation&feature=fig|6666666.640606.peg.1044&#39; target=_blank>fig|6666666.640606.peg.1044</a>	yes	<a href=&#39;?page=Annotation&feature=fig|6666666.640605.peg.3609&#39; target=_blank>fig|6666666.640605.peg.3609</a>	yes
A and B	Nucleosides and Nucleotides	Purines	Purine conversions	Hypoxanthine-guanine phosphoribosyltransferase (EC 2.4.2.8)	<a href=&#39;?page=Annotation&feature=fig|6666666.640606.peg.2975&#39; target=_blank>fig|6666666.640606.peg.2975</a>	yes	<a href=&#39;?page=Annotation&feature=fig|6666666.640605.peg.1980&#39; target=_blank>fig|6666666.640605.peg.1980</a>	yes
A and B	Nucleosides and Nucleotides	Purines	Purine conversions	Inosine-5&#39;-monophosphate dehydrogenase (EC 1.1.1.205)	<a href=&#39;?page=Annotation&feature=fig|6666666.640606.peg.1761&#39; target=_blank>fig|6666666.640606.peg.1761</a>	yes	<a href=&#39;?page=Annotation&feature=fig|6666666.640605.peg.3519&#39; target=_blank>fig|6666666.640605.peg.3519</a>	yes
A and B	Nucleosides and Nucleotides	Purines	Purine conversions	Nucleoside diphosphate kinase (EC 2.7.4.6)	<a href=&#39;?page=Annotation&feature=fig|6666666.640606.peg.1278&#39; target=_blank>fig|6666666.640606.peg.1278</a>	yes	<a href=&#39;?page=Annotation&feature=fig|6666666.640605.peg.3285&#39; target=_blank>fig|6666666.640605.peg.3285</a>	yes
A and B	Nucleosides and Nucleotides	Purines	Purine conversions	Nucleotide pyrophosphatase (EC 3.6.1.9)	<a href=&#39;?page=Annotation&feature=fig|6666666.640606.peg.3235&#39; target=_blank>fig|6666666.640606.peg.3235</a>	yes	<a href=&#39;?page=Annotation&feature=fig|6666666.640605.peg.1488&#39; target=_blank>fig|6666666.640605.peg.1488</a>	yes
A and B	Nucleosides and Nucleotides	Purines	Purine conversions	Polyphosphate kinase (EC 2.7.4.1)	<a href=&#39;?page=Annotation&feature=fig|6666666.640606.peg.517&#39; target=_blank>fig|6666666.640606.peg.517</a>	yes	<a href=&#39;?page=Annotation&feature=fig|6666666.640605.peg.2613&#39; target=_blank>fig|6666666.640605.peg.2613</a>	yes
A and B	Nucleosides and Nucleotides	Purines	Purine conversions	Purine nucleoside phosphorylase (EC 2.4.2.1)	<a href=&#39;?page=Annotation&feature=fig|6666666.640606.peg.957&#39; target=_blank>fig|6666666.640606.peg.957</a>, <a href=&#39;?page=Annotation&feature=fig|6666666.640606.peg.1568&#39; target=_blank>fig|6666666.640606.peg.1568</a>	yes	<a href=&#39;?page=Annotation&feature=fig|6666666.640605.peg.524&#39; target=_blank>fig|6666666.640605.peg.524</a>, <a href=&#39;?page=Annotation&feature=fig|6666666.640605.peg.3540&#39; target=_blank>fig|6666666.640605.peg.3540</a>	yes
A and B	Nucleosides and Nucleotides	Purines	Purine conversions	dNTP triphosphohydrolase, broad substrate specificity, subgroup 3	<a href=&#39;?page=Annotation&feature=fig|6666666.640606.peg.1860&#39; target=_blank>fig|6666666.640606.peg.1860</a>	yes	<a href=&#39;?page=Annotation&feature=fig|6666666.640605.peg.775&#39; target=_blank>fig|6666666.640605.peg.775</a>	yes
B	Nucleosides and Nucleotides	Purines	Purine Utilization	Xanthine/uracil/thiamine/ascorbate permease family protein	<input type=&#39;button&#39; value=&#39;find&#39; onclick=&#39;window.open("?page=SearchGene&fr=Xanthine/uracil/thiamine/ascorbate permease family protein&organism=6666666.640606&subsystem=Purine_Utilization&template_gene=fig|6666666.640605.peg.3471");&#39;>	no	<a href=&#39;?page=Annotation&feature=fig|6666666.640605.peg.3471&#39; target=_blank>fig|6666666.640605.peg.3471</a>	yes
A and B	Nucleosides and Nucleotides	Pyrimidines	pyrimidine conversions	5&#39;-nucleotidase (EC 3.1.3.5)	<a href=&#39;?page=Annotation&feature=fig|6666666.640606.peg.2750&#39; target=_blank>fig|6666666.640606.peg.2750</a>	yes	<a href=&#39;?page=Annotation&feature=fig|6666666.640605.peg.1297&#39; target=_blank>fig|6666666.640605.peg.1297</a>	yes
A and B	Nucleosides and Nucleotides	Pyrimidines	pyrimidine conversions	CTP synthase (EC 6.3.4.2)	<a href=&#39;?page=Annotation&feature=fig|6666666.640606.peg.3677&#39; target=_blank>fig|6666666.640606.peg.3677</a>	yes	<a href=&#39;?page=Annotation&feature=fig|6666666.640605.peg.3815&#39; target=_blank>fig|6666666.640605.peg.3815</a>	yes
A and B	Nucleosides and Nucleotides	Pyrimidines	pyrimidine conversions	Cytidine deaminase (EC 3.5.4.5)	<a href=&#39;?page=Annotation&feature=fig|6666666.640606.peg.1508&#39; target=_blank>fig|6666666.640606.peg.1508</a>	yes	<a href=&#39;?page=Annotation&feature=fig|6666666.640605.peg.2177&#39; target=_blank>fig|6666666.640605.peg.2177</a>	yes
A and B	Nucleosides and Nucleotides	Pyrimidines	pyrimidine conversions	Cytidylate kinase (EC 2.7.4.25)	<a href=&#39;?page=Annotation&feature=fig|6666666.640606.peg.2963&#39; target=_blank>fig|6666666.640606.peg.2963</a>	yes	<a href=&#39;?page=Annotation&feature=fig|6666666.640605.peg.1966&#39; target=_blank>fig|6666666.640605.peg.1966</a>	yes
A and B	Nucleosides and Nucleotides	Pyrimidines	pyrimidine conversions	Nucleoside diphosphate kinase (EC 2.7.4.6)	<a href=&#39;?page=Annotation&feature=fig|6666666.640606.peg.1278&#39; target=_blank>fig|6666666.640606.peg.1278</a>	yes	<a href=&#39;?page=Annotation&feature=fig|6666666.640605.peg.3285&#39; target=_blank>fig|6666666.640605.peg.3285</a>	yes
A and B	Nucleosides and Nucleotides	Pyrimidines	pyrimidine conversions	Purine nucleoside phosphorylase (EC 2.4.2.1)	<a href=&#39;?page=Annotation&feature=fig|6666666.640606.peg.957&#39; target=_blank>fig|6666666.640606.peg.957</a>, <a href=&#39;?page=Annotation&feature=fig|6666666.640606.peg.1568&#39; target=_blank>fig|6666666.640606.peg.1568</a>	yes	<a href=&#39;?page=Annotation&feature=fig|6666666.640605.peg.524&#39; target=_blank>fig|6666666.640605.peg.524</a>, <a href=&#39;?page=Annotation&feature=fig|6666666.640605.peg.3540&#39; target=_blank>fig|6666666.640605.peg.3540</a>	yes
A and B	Nucleosides and Nucleotides	Pyrimidines	pyrimidine conversions	Thioredoxin reductase (EC 1.8.1.9)	<a href=&#39;?page=Annotation&feature=fig|6666666.640606.peg.828&#39; target=_blank>fig|6666666.640606.peg.828</a>, <a href=&#39;?page=Annotation&feature=fig|6666666.640606.peg.977&#39; target=_blank>fig|6666666.640606.peg.977</a>, <a href=&#39;?page=Annotation&feature=fig|6666666.640606.peg.3087&#39; target=_blank>fig|6666666.640606.peg.3087</a>	yes	<a href=&#39;?page=Annotation&feature=fig|6666666.640605.peg.1159&#39; target=_blank>fig|6666666.640605.peg.1159</a>, <a href=&#39;?page=Annotation&feature=fig|6666666.640605.peg.1856&#39; target=_blank>fig|6666666.640605.peg.1856</a>, <a href=&#39;?page=Annotation&feature=fig|6666666.640605.peg.3520&#39; target=_blank>fig|6666666.640605.peg.3520</a>	yes
A and B	Nucleosides and Nucleotides	Pyrimidines	pyrimidine conversions	Thymidine kinase (EC 2.7.1.21)	<a href=&#39;?page=Annotation&feature=fig|6666666.640606.peg.1325&#39; target=_blank>fig|6666666.640606.peg.1325</a>	yes	<a href=&#39;?page=Annotation&feature=fig|6666666.640605.peg.3356&#39; target=_blank>fig|6666666.640605.peg.3356</a>	yes
A and B	Nucleosides and Nucleotides	Pyrimidines	pyrimidine conversions	Thymidylate synthase (EC 2.1.1.45)	<a href=&#39;?page=Annotation&feature=fig|6666666.640606.peg.2599&#39; target=_blank>fig|6666666.640606.peg.2599</a>	yes	<a href=&#39;?page=Annotation&feature=fig|6666666.640605.peg.2307&#39; target=_blank>fig|6666666.640605.peg.2307</a>	yes
A and B	Nucleosides and Nucleotides	Pyrimidines	pyrimidine conversions	Uracil phosphoribosyltransferase (EC 2.4.2.9)	<a href=&#39;?page=Annotation&feature=fig|6666666.640606.peg.2979&#39; target=_blank>fig|6666666.640606.peg.2979</a>	yes	<a href=&#39;?page=Annotation&feature=fig|6666666.640605.peg.1984&#39; target=_blank>fig|6666666.640605.peg.1984</a>	yes
A and B	Nucleosides and Nucleotides	Pyrimidines	pyrimidine conversions	Uridine kinase (EC 2.7.1.48)	<a href=&#39;?page=Annotation&feature=fig|6666666.640606.peg.2031&#39; target=_blank>fig|6666666.640606.peg.2031</a>	yes	<a href=&#39;?page=Annotation&feature=fig|6666666.640605.peg.612&#39; target=_blank>fig|6666666.640605.peg.612</a>	yes
A and B	Nucleosides and Nucleotides	no subcategory	Adenosyl nucleosidases	Purine nucleoside phosphorylase (EC 2.4.2.1)	<a href=&#39;?page=Annotation&feature=fig|6666666.640606.peg.957&#39; target=_blank>fig|6666666.640606.peg.957</a>, <a href=&#39;?page=Annotation&feature=fig|6666666.640606.peg.1568&#39; target=_blank>fig|6666666.640606.peg.1568</a>	yes	<a href=&#39;?page=Annotation&feature=fig|6666666.640605.peg.524&#39; target=_blank>fig|6666666.640605.peg.524</a>, <a href=&#39;?page=Annotation&feature=fig|6666666.640605.peg.3540&#39; target=_blank>fig|6666666.640605.peg.3540</a>	yes
A and B	Nucleosides and Nucleotides	no subcategory	Hydantoin metabolism	Deacetylases, including yeast histone deacetylase and acetoin utilization protein	<a href=&#39;?page=Annotation&feature=fig|6666666.640606.peg.2216&#39; target=_blank>fig|6666666.640606.peg.2216</a>	yes	<a href=&#39;?page=Annotation&feature=fig|6666666.640605.peg.1691&#39; target=_blank>fig|6666666.640605.peg.1691</a>	yes
A and B	Nucleosides and Nucleotides	no subcategory	Hydantoin metabolism	N-carbamoyl-L-amino acid hydrolase (EC 3.5.1.87)	<a href=&#39;?page=Annotation&feature=fig|6666666.640606.peg.922&#39; target=_blank>fig|6666666.640606.peg.922</a>	yes	<a href=&#39;?page=Annotation&feature=fig|6666666.640605.peg.2054&#39; target=_blank>fig|6666666.640605.peg.2054</a>	yes
A and B	Nucleosides and Nucleotides	no subcategory	Ribonucleotide reduction	Ribonucleotide reductase of class III (anaerobic), activating protein (EC 1.97.1.4)	<a href=&#39;?page=Annotation&feature=fig|6666666.640606.peg.288&#39; target=_blank>fig|6666666.640606.peg.288</a>	yes	<a href=&#39;?page=Annotation&feature=fig|6666666.640605.peg.1535&#39; target=_blank>fig|6666666.640605.peg.1535</a>	yes
A and B	Nucleosides and Nucleotides	no subcategory	Ribonucleotide reduction	Ribonucleotide reductase of class III (anaerobic), large subunit (EC 1.17.4.2)	<a href=&#39;?page=Annotation&feature=fig|6666666.640606.peg.286&#39; target=_blank>fig|6666666.640606.peg.286</a>	yes	<a href=&#39;?page=Annotation&feature=fig|6666666.640605.peg.1533&#39; target=_blank>fig|6666666.640605.peg.1533</a>	yes
A and B	Nucleosides and Nucleotides	no subcategory	Ribonucleotide reduction	Ribonucleotide reductase of class Ia (aerobic), alpha subunit (EC 1.17.4.1)	<a href=&#39;?page=Annotation&feature=fig|6666666.640606.peg.3477&#39; target=_blank>fig|6666666.640606.peg.3477</a>	yes	<a href=&#39;?page=Annotation&feature=fig|6666666.640605.peg.3147&#39; target=_blank>fig|6666666.640605.peg.3147</a>	yes
A and B	Nucleosides and Nucleotides	no subcategory	Ribonucleotide reduction	Ribonucleotide reductase of class Ia (aerobic), beta subunit (EC 1.17.4.1)	<a href=&#39;?page=Annotation&feature=fig|6666666.640606.peg.3476&#39; target=_blank>fig|6666666.640606.peg.3476</a>	yes	<a href=&#39;?page=Annotation&feature=fig|6666666.640605.peg.3146&#39; target=_blank>fig|6666666.640605.peg.3146</a>	yes
A and B	Nucleosides and Nucleotides	no subcategory	dNTP triphosphohydrolase protein family	dNTP triphosphohydrolase, broad substrate specificity, subgroup 3	<a href=&#39;?page=Annotation&feature=fig|6666666.640606.peg.1860&#39; target=_blank>fig|6666666.640606.peg.1860</a>	yes	<a href=&#39;?page=Annotation&feature=fig|6666666.640605.peg.775&#39; target=_blank>fig|6666666.640605.peg.775</a>	yes
B	Nucleosides and Nucleotides	no subcategory	Adenosyl nucleosidases	5&#39;-methylthioadenosine nucleosidase (EC 3.2.2.16)	<input type=&#39;button&#39; value=&#39;find&#39; onclick=&#39;window.open("?page=SearchGene&fr=5%27-methylthioadenosine nucleosidase (EC 3.2.2.16)&organism=6666666.640606&subsystem=Adenosyl_nucleosidases&template_gene=fig|6666666.640605.peg.3472");&#39;>	no	<a href=&#39;?page=Annotation&feature=fig|6666666.640605.peg.3472&#39; target=_blank>fig|6666666.640605.peg.3472</a>	yes
B	Nucleosides and Nucleotides	no subcategory	Adenosyl nucleosidases	S-adenosylhomocysteine nucleosidase (EC 3.2.2.9)	<input type=&#39;button&#39; value=&#39;find&#39; onclick=&#39;window.open("?page=SearchGene&fr=S-adenosylhomocysteine nucleosidase (EC 3.2.2.9)&organism=6666666.640606&subsystem=Adenosyl_nucleosidases&template_gene=fig|6666666.640605.peg.3472");&#39;>	no	<a href=&#39;?page=Annotation&feature=fig|6666666.640605.peg.3472&#39; target=_blank>fig|6666666.640605.peg.3472</a>	yes
A and B	Phosphorus Metabolism	no subcategory	Phosphate metabolism	Alkaline phosphatase (EC 3.1.3.1)	<a href=&#39;?page=Annotation&feature=fig|6666666.640606.peg.2262&#39; target=_blank>fig|6666666.640606.peg.2262</a>, <a href=&#39;?page=Annotation&feature=fig|6666666.640606.peg.3422&#39; target=_blank>fig|6666666.640606.peg.3422</a>	yes	<a href=&#39;?page=Annotation&feature=fig|6666666.640605.peg.13&#39; target=_blank>fig|6666666.640605.peg.13</a>, <a href=&#39;?page=Annotation&feature=fig|6666666.640605.peg.3111&#39; target=_blank>fig|6666666.640605.peg.3111</a>	yes
A and B	Phosphorus Metabolism	no subcategory	Phosphate metabolism	Exopolyphosphatase (EC 3.6.1.11)	<a href=&#39;?page=Annotation&feature=fig|6666666.640606.peg.1708&#39; target=_blank>fig|6666666.640606.peg.1708</a>	yes	<a href=&#39;?page=Annotation&feature=fig|6666666.640605.peg.3730&#39; target=_blank>fig|6666666.640605.peg.3730</a>	yes
A and B	Phosphorus Metabolism	no subcategory	Phosphate metabolism	Inorganic pyrophosphatase (EC 3.6.1.1)	<a href=&#39;?page=Annotation&feature=fig|6666666.640606.peg.2704&#39; target=_blank>fig|6666666.640606.peg.2704</a>	yes	<a href=&#39;?page=Annotation&feature=fig|6666666.640605.peg.3845&#39; target=_blank>fig|6666666.640605.peg.3845</a>	yes
A and B	Phosphorus Metabolism	no subcategory	Phosphate metabolism	NAD(P) transhydrogenase subunit beta (EC 1.6.1.2)	<a href=&#39;?page=Annotation&feature=fig|6666666.640606.peg.2745&#39; target=_blank>fig|6666666.640606.peg.2745</a>	yes	<a href=&#39;?page=Annotation&feature=fig|6666666.640605.peg.1408&#39; target=_blank>fig|6666666.640605.peg.1408</a>	yes
A and B	Phosphorus Metabolism	no subcategory	Phosphate metabolism	Phosphate starvation-inducible protein PhoH, predicted ATPase	<a href=&#39;?page=Annotation&feature=fig|6666666.640606.peg.2906&#39; target=_blank>fig|6666666.640606.peg.2906</a>, <a href=&#39;?page=Annotation&feature=fig|6666666.640606.peg.2906&#39; target=_blank>fig|6666666.640606.peg.2906</a>	yes	<a href=&#39;?page=Annotation&feature=fig|6666666.640605.peg.977&#39; target=_blank>fig|6666666.640605.peg.977</a>, <a href=&#39;?page=Annotation&feature=fig|6666666.640605.peg.977&#39; target=_blank>fig|6666666.640605.peg.977</a>	yes
A and B	Phosphorus Metabolism	no subcategory	Phosphate metabolism	Polyphosphate kinase (EC 2.7.4.1)	<a href=&#39;?page=Annotation&feature=fig|6666666.640606.peg.517&#39; target=_blank>fig|6666666.640606.peg.517</a>	yes	<a href=&#39;?page=Annotation&feature=fig|6666666.640605.peg.2613&#39; target=_blank>fig|6666666.640605.peg.2613</a>	yes
A and B	Phosphorus Metabolism	no subcategory	Phosphate metabolism	Predicted ATPase related to phosphate starvation-inducible protein PhoH	<a href=&#39;?page=Annotation&feature=fig|6666666.640606.peg.1194&#39; target=_blank>fig|6666666.640606.peg.1194</a>	yes	<a href=&#39;?page=Annotation&feature=fig|6666666.640605.peg.681&#39; target=_blank>fig|6666666.640605.peg.681</a>	yes
A and B	Phosphorus Metabolism	no subcategory	Phosphate metabolism	Pyrophosphate-energized proton pump (EC 3.6.1.1)	<a href=&#39;?page=Annotation&feature=fig|6666666.640606.peg.3150&#39; target=_blank>fig|6666666.640606.peg.3150</a>	yes	<a href=&#39;?page=Annotation&feature=fig|6666666.640605.peg.2444&#39; target=_blank>fig|6666666.640605.peg.2444</a>	yes
A and B	Phosphorus Metabolism	no subcategory	Phosphate metabolism	Sodium-dependent phosphate transporter	<a href=&#39;?page=Annotation&feature=fig|6666666.640606.peg.1270&#39; target=_blank>fig|6666666.640606.peg.1270</a>, <a href=&#39;?page=Annotation&feature=fig|6666666.640606.peg.2393&#39; target=_blank>fig|6666666.640606.peg.2393</a>	yes	<a href=&#39;?page=Annotation&feature=fig|6666666.640605.peg.3294&#39; target=_blank>fig|6666666.640605.peg.3294</a>	yes
A and B	Phosphorus Metabolism	no subcategory	Polyphosphate	Exopolyphosphatase (EC 3.6.1.11)	<a href=&#39;?page=Annotation&feature=fig|6666666.640606.peg.1708&#39; target=_blank>fig|6666666.640606.peg.1708</a>	yes	<a href=&#39;?page=Annotation&feature=fig|6666666.640605.peg.3730&#39; target=_blank>fig|6666666.640605.peg.3730</a>	yes
A and B	Phosphorus Metabolism	no subcategory	Polyphosphate	Polyphosphate glucokinase (EC 2.7.1.63)	<a href=&#39;?page=Annotation&feature=fig|6666666.640606.peg.791&#39; target=_blank>fig|6666666.640606.peg.791</a>	yes	<a href=&#39;?page=Annotation&feature=fig|6666666.640605.peg.1894&#39; target=_blank>fig|6666666.640605.peg.1894</a>	yes
A and B	Phosphorus Metabolism	no subcategory	Polyphosphate	Polyphosphate kinase (EC 2.7.4.1)	<a href=&#39;?page=Annotation&feature=fig|6666666.640606.peg.517&#39; target=_blank>fig|6666666.640606.peg.517</a>	yes	<a href=&#39;?page=Annotation&feature=fig|6666666.640605.peg.2613&#39; target=_blank>fig|6666666.640605.peg.2613</a>	yes
B	Phosphorus Metabolism	no subcategory	Phosphate metabolism	Phosphate regulon transcriptional regulatory protein PhoB (SphR)	<input type=&#39;button&#39; value=&#39;find&#39; onclick=&#39;window.open("?page=SearchGene&fr=Phosphate regulon transcriptional regulatory protein PhoB (SphR)&organism=6666666.640606&subsystem=Phosphate_metabolism&template_gene=fig|6666666.640605.peg.441");&#39;>	no	<a href=&#39;?page=Annotation&feature=fig|6666666.640605.peg.441&#39; target=_blank>fig|6666666.640605.peg.441</a>	yes
A and B	Potassium metabolism	no subcategory	Potassium homeostasis	FKBP-type peptidyl-prolyl cis-trans isomerase SlyD (EC 5.2.1.8)	<a href=&#39;?page=Annotation&feature=fig|6666666.640606.peg.381&#39; target=_blank>fig|6666666.640606.peg.381</a>, <a href=&#39;?page=Annotation&feature=fig|6666666.640606.peg.2068&#39; target=_blank>fig|6666666.640606.peg.2068</a>, <a href=&#39;?page=Annotation&feature=fig|6666666.640606.peg.3627&#39; target=_blank>fig|6666666.640606.peg.3627</a>	yes	<a href=&#39;?page=Annotation&feature=fig|6666666.640605.peg.654&#39; target=_blank>fig|6666666.640605.peg.654</a>, <a href=&#39;?page=Annotation&feature=fig|6666666.640605.peg.1428&#39; target=_blank>fig|6666666.640605.peg.1428</a>, <a href=&#39;?page=Annotation&feature=fig|6666666.640605.peg.3795&#39; target=_blank>fig|6666666.640605.peg.3795</a>	yes
A and B	Potassium metabolism	no subcategory	Potassium homeostasis	Large-conductance mechanosensitive channel	<a href=&#39;?page=Annotation&feature=fig|6666666.640606.peg.666&#39; target=_blank>fig|6666666.640606.peg.666</a>	yes	<a href=&#39;?page=Annotation&feature=fig|6666666.640605.peg.2558&#39; target=_blank>fig|6666666.640605.peg.2558</a>	yes
A and B	Potassium metabolism	no subcategory	Potassium homeostasis	Potassium efflux system KefA protein	<a href=&#39;?page=Annotation&feature=fig|6666666.640606.peg.1669&#39; target=_blank>fig|6666666.640606.peg.1669</a>, <a href=&#39;?page=Annotation&feature=fig|6666666.640606.peg.1717&#39; target=_blank>fig|6666666.640606.peg.1717</a>, <a href=&#39;?page=Annotation&feature=fig|6666666.640606.peg.1889&#39; target=_blank>fig|6666666.640606.peg.1889</a>, <a href=&#39;?page=Annotation&feature=fig|666…	yes	<a href=&#39;?page=Annotation&feature=fig|6666666.640605.peg.388&#39; target=_blank>fig|6666666.640605.peg.388</a>, <a href=&#39;?page=Annotation&feature=fig|6666666.640605.peg.641&#39; target=_blank>fig|6666666.640605.peg.641</a>, <a href=&#39;?page=Annotation&feature=fig|6666666.640605.peg.1376&#39; target=_blank>fig|6666666.640605.peg.1376</a>, <a href=&#39;?page=Annotation&feature=fig|6666666…	yes
A and B	Potassium metabolism	no subcategory	Potassium homeostasis	Potassium voltage-gated channel subfamily KQT	<a href=&#39;?page=Annotation&feature=fig|6666666.640606.peg.1212&#39; target=_blank>fig|6666666.640606.peg.1212</a>	yes	<a href=&#39;?page=Annotation&feature=fig|6666666.640605.peg.785&#39; target=_blank>fig|6666666.640605.peg.785</a>	yes
A and B	Protein Metabolism	Protein biosynthesis	Programmed frameshift	Peptide chain release factor 2	<a href=&#39;?page=Annotation&feature=fig|6666666.640606.peg.661&#39; target=_blank>fig|6666666.640606.peg.661</a>	yes	<a href=&#39;?page=Annotation&feature=fig|6666666.640605.peg.2588&#39; target=_blank>fig|6666666.640605.peg.2588</a>	yes
A and B	Protein Metabolism	Protein biosynthesis	Programmed frameshift	programmed frameshift-containing	<a href=&#39;?page=Annotation&feature=fig|6666666.640606.peg.661&#39; target=_blank>fig|6666666.640606.peg.661</a>	yes	<a href=&#39;?page=Annotation&feature=fig|6666666.640605.peg.2588&#39; target=_blank>fig|6666666.640605.peg.2588</a>	yes
A and B	Protein Metabolism	Protein biosynthesis	Ribosome LSU bacterial	LSU ribosomal protein L10p (P0)	<a href=&#39;?page=Annotation&feature=fig|6666666.640606.peg.1619&#39; target=_blank>fig|6666666.640606.peg.1619</a>	yes	<a href=&#39;?page=Annotation&feature=fig|6666666.640605.peg.3633&#39; target=_blank>fig|6666666.640605.peg.3633</a>	yes
A and B	Protein Metabolism	Protein biosynthesis	Ribosome LSU bacterial	LSU ribosomal protein L11p (L12e)	<a href=&#39;?page=Annotation&feature=fig|6666666.640606.peg.1617&#39; target=_blank>fig|6666666.640606.peg.1617</a>	yes	<a href=&#39;?page=Annotation&feature=fig|6666666.640605.peg.3631&#39; target=_blank>fig|6666666.640605.peg.3631</a>	yes
A and B	Protein Metabolism	Protein biosynthesis	Ribosome LSU bacterial	LSU ribosomal protein L13p (L13Ae)	<a href=&#39;?page=Annotation&feature=fig|6666666.640606.peg.2885&#39; target=_blank>fig|6666666.640606.peg.2885</a>	yes	<a href=&#39;?page=Annotation&feature=fig|6666666.640605.peg.3068&#39; target=_blank>fig|6666666.640605.peg.3068</a>	yes
A and B	Protein Metabolism	Protein biosynthesis	Ribosome LSU bacterial	LSU ribosomal protein L14p (L23e)	<a href=&#39;?page=Annotation&feature=fig|6666666.640606.peg.1638&#39; target=_blank>fig|6666666.640606.peg.1638</a>	yes	<a href=&#39;?page=Annotation&feature=fig|6666666.640605.peg.3652&#39; target=_blank>fig|6666666.640605.peg.3652</a>	yes
A and B	Protein Metabolism	Protein biosynthesis	Ribosome LSU bacterial	LSU ribosomal protein L15p (L27Ae)	<a href=&#39;?page=Annotation&feature=fig|6666666.640606.peg.1647&#39; target=_blank>fig|6666666.640606.peg.1647</a>	yes	<a href=&#39;?page=Annotation&feature=fig|6666666.640605.peg.3661&#39; target=_blank>fig|6666666.640605.peg.3661</a>	yes
A and B	Protein Metabolism	Protein biosynthesis	Ribosome LSU bacterial	LSU ribosomal protein L16p (L10e)	<a href=&#39;?page=Annotation&feature=fig|6666666.640606.peg.1635&#39; target=_blank>fig|6666666.640606.peg.1635</a>	yes	<a href=&#39;?page=Annotation&feature=fig|6666666.640605.peg.3649&#39; target=_blank>fig|6666666.640605.peg.3649</a>	yes
A and B	Protein Metabolism	Protein biosynthesis	Ribosome LSU bacterial	LSU ribosomal protein L17p	<a href=&#39;?page=Annotation&feature=fig|6666666.640606.peg.1656&#39; target=_blank>fig|6666666.640606.peg.1656</a>	yes	<a href=&#39;?page=Annotation&feature=fig|6666666.640605.peg.3670&#39; target=_blank>fig|6666666.640605.peg.3670</a>	yes
A and B	Protein Metabolism	Protein biosynthesis	Ribosome LSU bacterial	LSU ribosomal protein L18p (L5e)	<a href=&#39;?page=Annotation&feature=fig|6666666.640606.peg.1644&#39; target=_blank>fig|6666666.640606.peg.1644</a>	yes	<a href=&#39;?page=Annotation&feature=fig|6666666.640605.peg.3658&#39; target=_blank>fig|6666666.640605.peg.3658</a>	yes
A and B	Protein Metabolism	Protein biosynthesis	Ribosome LSU bacterial	LSU ribosomal protein L19p	<a href=&#39;?page=Annotation&feature=fig|6666666.640606.peg.1426&#39; target=_blank>fig|6666666.640606.peg.1426</a>	yes	<a href=&#39;?page=Annotation&feature=fig|6666666.640605.peg.2134&#39; target=_blank>fig|6666666.640605.peg.2134</a>	yes
A and B	Protein Metabolism	Protein biosynthesis	Ribosome LSU bacterial	LSU ribosomal protein L1p (L10Ae)	<a href=&#39;?page=Annotation&feature=fig|6666666.640606.peg.1618&#39; target=_blank>fig|6666666.640606.peg.1618</a>	yes	<a href=&#39;?page=Annotation&feature=fig|6666666.640605.peg.3632&#39; target=_blank>fig|6666666.640605.peg.3632</a>	yes
A and B	Protein Metabolism	Protein biosynthesis	Ribosome LSU bacterial	LSU ribosomal protein L20p	<a href=&#39;?page=Annotation&feature=fig|6666666.640606.peg.820&#39; target=_blank>fig|6666666.640606.peg.820</a>	yes	<a href=&#39;?page=Annotation&feature=fig|6666666.640605.peg.1866&#39; target=_blank>fig|6666666.640605.peg.1866</a>	yes
A and B	Protein Metabolism	Protein biosynthesis	Ribosome LSU bacterial	LSU ribosomal protein L21p	<a href=&#39;?page=Annotation&feature=fig|6666666.640606.peg.3475&#39; target=_blank>fig|6666666.640606.peg.3475</a>	yes	<a href=&#39;?page=Annotation&feature=fig|6666666.640605.peg.3144&#39; target=_blank>fig|6666666.640605.peg.3144</a>	yes
A and B	Protein Metabolism	Protein biosynthesis	Ribosome LSU bacterial	LSU ribosomal protein L22p (L17e)	<a href=&#39;?page=Annotation&feature=fig|6666666.640606.peg.1633&#39; target=_blank>fig|6666666.640606.peg.1633</a>	yes	<a href=&#39;?page=Annotation&feature=fig|6666666.640605.peg.3647&#39; target=_blank>fig|6666666.640605.peg.3647</a>	yes
A and B	Protein Metabolism	Protein biosynthesis	Ribosome LSU bacterial	LSU ribosomal protein L23p (L23Ae)	<a href=&#39;?page=Annotation&feature=fig|6666666.640606.peg.1630&#39; target=_blank>fig|6666666.640606.peg.1630</a>	yes	<a href=&#39;?page=Annotation&feature=fig|6666666.640605.peg.3644&#39; target=_blank>fig|6666666.640605.peg.3644</a>	yes
A and B	Protein Metabolism	Protein biosynthesis	Ribosome LSU bacterial	LSU ribosomal protein L24p (L26e)	<a href=&#39;?page=Annotation&feature=fig|6666666.640606.peg.1639&#39; target=_blank>fig|6666666.640606.peg.1639</a>	yes	<a href=&#39;?page=Annotation&feature=fig|6666666.640605.peg.3653&#39; target=_blank>fig|6666666.640605.peg.3653</a>	yes
A and B	Protein Metabolism	Protein biosynthesis	Ribosome LSU bacterial	LSU ribosomal protein L25p	<a href=&#39;?page=Annotation&feature=fig|6666666.640606.peg.3656&#39; target=_blank>fig|6666666.640606.peg.3656</a>	yes	<a href=&#39;?page=Annotation&feature=fig|6666666.640605.peg.3834&#39; target=_blank>fig|6666666.640605.peg.3834</a>	yes
A and B	Protein Metabolism	Protein biosynthesis	Ribosome LSU bacterial	LSU ribosomal protein L27p	<a href=&#39;?page=Annotation&feature=fig|6666666.640606.peg.3474&#39; target=_blank>fig|6666666.640606.peg.3474</a>	yes	<a href=&#39;?page=Annotation&feature=fig|6666666.640605.peg.3143&#39; target=_blank>fig|6666666.640605.peg.3143</a>	yes
A and B	Protein Metabolism	Protein biosynthesis	Ribosome LSU bacterial	LSU ribosomal protein L28p	<a href=&#39;?page=Annotation&feature=fig|6666666.640606.peg.16&#39; target=_blank>fig|6666666.640606.peg.16</a>	yes	<a href=&#39;?page=Annotation&feature=fig|6666666.640605.peg.912&#39; target=_blank>fig|6666666.640605.peg.912</a>	yes
A and B	Protein Metabolism	Protein biosynthesis	Ribosome LSU bacterial	LSU ribosomal protein L29p (L35e)	<a href=&#39;?page=Annotation&feature=fig|6666666.640606.peg.1636&#39; target=_blank>fig|6666666.640606.peg.1636</a>	yes	<a href=&#39;?page=Annotation&feature=fig|6666666.640605.peg.3650&#39; target=_blank>fig|6666666.640605.peg.3650</a>	yes
A and B	Protein Metabolism	Protein biosynthesis	Ribosome LSU bacterial	LSU ribosomal protein L2p (L8e)	<a href=&#39;?page=Annotation&feature=fig|6666666.640606.peg.1631&#39; target=_blank>fig|6666666.640606.peg.1631</a>	yes	<a href=&#39;?page=Annotation&feature=fig|6666666.640605.peg.3645&#39; target=_blank>fig|6666666.640605.peg.3645</a>	yes
A and B	Protein Metabolism	Protein biosynthesis	Ribosome LSU bacterial	LSU ribosomal protein L30p (L7e)	<a href=&#39;?page=Annotation&feature=fig|6666666.640606.peg.1646&#39; target=_blank>fig|6666666.640606.peg.1646</a>	yes	<a href=&#39;?page=Annotation&feature=fig|6666666.640605.peg.3660&#39; target=_blank>fig|6666666.640605.peg.3660</a>	yes
A and B	Protein Metabolism	Protein biosynthesis	Ribosome LSU bacterial	LSU ribosomal protein L31p	<a href=&#39;?page=Annotation&feature=fig|6666666.640606.peg.49&#39; target=_blank>fig|6666666.640606.peg.49</a>	yes	<a href=&#39;?page=Annotation&feature=fig|6666666.640605.peg.954&#39; target=_blank>fig|6666666.640605.peg.954</a>	yes
A and B	Protein Metabolism	Protein biosynthesis	Ribosome LSU bacterial	LSU ribosomal protein L31p, zinc-independent	<a href=&#39;?page=Annotation&feature=fig|6666666.640606.peg.49&#39; target=_blank>fig|6666666.640606.peg.49</a>	yes	<a href=&#39;?page=Annotation&feature=fig|6666666.640605.peg.954&#39; target=_blank>fig|6666666.640605.peg.954</a>	yes
A and B	Protein Metabolism	Protein biosynthesis	Ribosome LSU bacterial	LSU ribosomal protein L32p	<a href=&#39;?page=Annotation&feature=fig|6666666.640606.peg.3249&#39; target=_blank>fig|6666666.640606.peg.3249</a>	yes	<a href=&#39;?page=Annotation&feature=fig|6666666.640605.peg.23&#39; target=_blank>fig|6666666.640605.peg.23</a>	yes
A and B	Protein Metabolism	Protein biosynthesis	Ribosome LSU bacterial	LSU ribosomal protein L33p	<a href=&#39;?page=Annotation&feature=fig|6666666.640606.peg.15&#39; target=_blank>fig|6666666.640606.peg.15</a>	yes	<a href=&#39;?page=Annotation&feature=fig|6666666.640605.peg.911&#39; target=_blank>fig|6666666.640605.peg.911</a>	yes
A and B	Protein Metabolism	Protein biosynthesis	Ribosome LSU bacterial	LSU ribosomal protein L33p, zinc-independent	<a href=&#39;?page=Annotation&feature=fig|6666666.640606.peg.15&#39; target=_blank>fig|6666666.640606.peg.15</a>	yes	<a href=&#39;?page=Annotation&feature=fig|6666666.640605.peg.911&#39; target=_blank>fig|6666666.640605.peg.911</a>	yes
A and B	Protein Metabolism	Protein biosynthesis	Ribosome LSU bacterial	LSU ribosomal protein L34p	<a href=&#39;?page=Annotation&feature=fig|6666666.640606.peg.3401&#39; target=_blank>fig|6666666.640606.peg.3401</a>	yes	<a href=&#39;?page=Annotation&feature=fig|6666666.640605.peg.1914&#39; target=_blank>fig|6666666.640605.peg.1914</a>	yes
A and B	Protein Metabolism	Protein biosynthesis	Ribosome LSU bacterial	LSU ribosomal protein L35p	<a href=&#39;?page=Annotation&feature=fig|6666666.640606.peg.819&#39; target=_blank>fig|6666666.640606.peg.819</a>	yes	<a href=&#39;?page=Annotation&feature=fig|6666666.640605.peg.1867&#39; target=_blank>fig|6666666.640605.peg.1867</a>	yes
A and B	Protein Metabolism	Protein biosynthesis	Ribosome LSU bacterial	LSU ribosomal protein L36p	<a href=&#39;?page=Annotation&feature=fig|6666666.640606.peg.1651&#39; target=_blank>fig|6666666.640606.peg.1651</a>	yes	<a href=&#39;?page=Annotation&feature=fig|6666666.640605.peg.3665&#39; target=_blank>fig|6666666.640605.peg.3665</a>	yes
A and B	Protein Metabolism	Protein biosynthesis	Ribosome LSU bacterial	LSU ribosomal protein L3p (L3e)	<a href=&#39;?page=Annotation&feature=fig|6666666.640606.peg.1628&#39; target=_blank>fig|6666666.640606.peg.1628</a>	yes	<a href=&#39;?page=Annotation&feature=fig|6666666.640605.peg.3642&#39; target=_blank>fig|6666666.640605.peg.3642</a>	yes
A and B	Protein Metabolism	Protein biosynthesis	Ribosome LSU bacterial	LSU ribosomal protein L4p (L1e)	<a href=&#39;?page=Annotation&feature=fig|6666666.640606.peg.1629&#39; target=_blank>fig|6666666.640606.peg.1629</a>	yes	<a href=&#39;?page=Annotation&feature=fig|6666666.640605.peg.3643&#39; target=_blank>fig|6666666.640605.peg.3643</a>	yes
A and B	Protein Metabolism	Protein biosynthesis	Ribosome LSU bacterial	LSU ribosomal protein L5p (L11e)	<a href=&#39;?page=Annotation&feature=fig|6666666.640606.peg.1640&#39; target=_blank>fig|6666666.640606.peg.1640</a>	yes	<a href=&#39;?page=Annotation&feature=fig|6666666.640605.peg.3654&#39; target=_blank>fig|6666666.640605.peg.3654</a>	yes
A and B	Protein Metabolism	Protein biosynthesis	Ribosome LSU bacterial	LSU ribosomal protein L6p (L9e)	<a href=&#39;?page=Annotation&feature=fig|6666666.640606.peg.1643&#39; target=_blank>fig|6666666.640606.peg.1643</a>	yes	<a href=&#39;?page=Annotation&feature=fig|6666666.640605.peg.3657&#39; target=_blank>fig|6666666.640605.peg.3657</a>	yes
A and B	Protein Metabolism	Protein biosynthesis	Ribosome LSU bacterial	LSU ribosomal protein L9p	<a href=&#39;?page=Annotation&feature=fig|6666666.640606.peg.3663&#39; target=_blank>fig|6666666.640606.peg.3663</a>	yes	<a href=&#39;?page=Annotation&feature=fig|6666666.640605.peg.3829&#39; target=_blank>fig|6666666.640605.peg.3829</a>	yes
A and B	Protein Metabolism	Protein biosynthesis	Ribosome SSU bacterial	SSU ribosomal protein S10p (S20e)	<a href=&#39;?page=Annotation&feature=fig|6666666.640606.peg.1627&#39; target=_blank>fig|6666666.640606.peg.1627</a>	yes	<a href=&#39;?page=Annotation&feature=fig|6666666.640605.peg.3641&#39; target=_blank>fig|6666666.640605.peg.3641</a>	yes
A and B	Protein Metabolism	Protein biosynthesis	Ribosome SSU bacterial	SSU ribosomal protein S11p (S14e)	<a href=&#39;?page=Annotation&feature=fig|6666666.640606.peg.1653&#39; target=_blank>fig|6666666.640606.peg.1653</a>	yes	<a href=&#39;?page=Annotation&feature=fig|6666666.640605.peg.3667&#39; target=_blank>fig|6666666.640605.peg.3667</a>	yes
A and B	Protein Metabolism	Protein biosynthesis	Ribosome SSU bacterial	SSU ribosomal protein S12p (S23e)	<a href=&#39;?page=Annotation&feature=fig|6666666.640606.peg.1624&#39; target=_blank>fig|6666666.640606.peg.1624</a>	yes	<a href=&#39;?page=Annotation&feature=fig|6666666.640605.peg.3638&#39; target=_blank>fig|6666666.640605.peg.3638</a>	yes
A and B	Protein Metabolism	Protein biosynthesis	Ribosome SSU bacterial	SSU ribosomal protein S13p (S18e)	<a href=&#39;?page=Annotation&feature=fig|6666666.640606.peg.1652&#39; target=_blank>fig|6666666.640606.peg.1652</a>	yes	<a href=&#39;?page=Annotation&feature=fig|6666666.640605.peg.3666&#39; target=_blank>fig|6666666.640605.peg.3666</a>	yes
A and B	Protein Metabolism	Protein biosynthesis	Ribosome SSU bacterial	SSU ribosomal protein S14p (S29e)	<a href=&#39;?page=Annotation&feature=fig|6666666.640606.peg.1641&#39; target=_blank>fig|6666666.640606.peg.1641</a>	yes	<a href=&#39;?page=Annotation&feature=fig|6666666.640605.peg.3655&#39; target=_blank>fig|6666666.640605.peg.3655</a>	yes
A and B	Protein Metabolism	Protein biosynthesis	Ribosome SSU bacterial	SSU ribosomal protein S14p (S29e), zinc-independent	<a href=&#39;?page=Annotation&feature=fig|6666666.640606.peg.1641&#39; target=_blank>fig|6666666.640606.peg.1641</a>	yes	<a href=&#39;?page=Annotation&feature=fig|6666666.640605.peg.3655&#39; target=_blank>fig|6666666.640605.peg.3655</a>	yes
A and B	Protein Metabolism	Protein biosynthesis	Ribosome SSU bacterial	SSU ribosomal protein S15p (S13e)	<a href=&#39;?page=Annotation&feature=fig|6666666.640606.peg.825&#39; target=_blank>fig|6666666.640606.peg.825</a>	yes	<a href=&#39;?page=Annotation&feature=fig|6666666.640605.peg.1859&#39; target=_blank>fig|6666666.640605.peg.1859</a>	yes
A and B	Protein Metabolism	Protein biosynthesis	Ribosome SSU bacterial	SSU ribosomal protein S16p	<a href=&#39;?page=Annotation&feature=fig|6666666.640606.peg.1429&#39; target=_blank>fig|6666666.640606.peg.1429</a>	yes	<a href=&#39;?page=Annotation&feature=fig|6666666.640605.peg.2137&#39; target=_blank>fig|6666666.640605.peg.2137</a>	yes
A and B	Protein Metabolism	Protein biosynthesis	Ribosome SSU bacterial	SSU ribosomal protein S17p (S11e)	<a href=&#39;?page=Annotation&feature=fig|6666666.640606.peg.1637&#39; target=_blank>fig|6666666.640606.peg.1637</a>	yes	<a href=&#39;?page=Annotation&feature=fig|6666666.640605.peg.3651&#39; target=_blank>fig|6666666.640605.peg.3651</a>	yes
A and B	Protein Metabolism	Protein biosynthesis	Ribosome SSU bacterial	SSU ribosomal protein S18p	<a href=&#39;?page=Annotation&feature=fig|6666666.640606.peg.3664&#39; target=_blank>fig|6666666.640606.peg.3664</a>	yes	<a href=&#39;?page=Annotation&feature=fig|6666666.640605.peg.3828&#39; target=_blank>fig|6666666.640605.peg.3828</a>	yes
A and B	Protein Metabolism	Protein biosynthesis	Ribosome SSU bacterial	SSU ribosomal protein S18p, zinc-independent	<a href=&#39;?page=Annotation&feature=fig|6666666.640606.peg.3664&#39; target=_blank>fig|6666666.640606.peg.3664</a>	yes	<a href=&#39;?page=Annotation&feature=fig|6666666.640605.peg.3828&#39; target=_blank>fig|6666666.640605.peg.3828</a>	yes
A and B	Protein Metabolism	Protein biosynthesis	Ribosome SSU bacterial	SSU ribosomal protein S19p (S15e)	<a href=&#39;?page=Annotation&feature=fig|6666666.640606.peg.1632&#39; target=_blank>fig|6666666.640606.peg.1632</a>	yes	<a href=&#39;?page=Annotation&feature=fig|6666666.640605.peg.3646&#39; target=_blank>fig|6666666.640605.peg.3646</a>	yes
A and B	Protein Metabolism	Protein biosynthesis	Ribosome SSU bacterial	SSU ribosomal protein S1p	<a href=&#39;?page=Annotation&feature=fig|6666666.640606.peg.3041&#39; target=_blank>fig|6666666.640606.peg.3041</a>	yes	<a href=&#39;?page=Annotation&feature=fig|6666666.640605.peg.2191&#39; target=_blank>fig|6666666.640605.peg.2191</a>	yes
A and B	Protein Metabolism	Protein biosynthesis	Ribosome SSU bacterial	SSU ribosomal protein S20p	<a href=&#39;?page=Annotation&feature=fig|6666666.640606.peg.2856&#39; target=_blank>fig|6666666.640606.peg.2856</a>	yes	<a href=&#39;?page=Annotation&feature=fig|6666666.640605.peg.3041&#39; target=_blank>fig|6666666.640605.peg.3041</a>	yes
A and B	Protein Metabolism	Protein biosynthesis	Ribosome SSU bacterial	SSU ribosomal protein S21p	<a href=&#39;?page=Annotation&feature=fig|6666666.640606.peg.1557&#39; target=_blank>fig|6666666.640606.peg.1557</a>	yes	<a href=&#39;?page=Annotation&feature=fig|6666666.640605.peg.513&#39; target=_blank>fig|6666666.640605.peg.513</a>	yes
A and B	Protein Metabolism	Protein biosynthesis	Ribosome SSU bacterial	SSU ribosomal protein S2p (SAe)	<a href=&#39;?page=Annotation&feature=fig|6666666.640606.peg.2887&#39; target=_blank>fig|6666666.640606.peg.2887</a>	yes	<a href=&#39;?page=Annotation&feature=fig|6666666.640605.peg.3070&#39; target=_blank>fig|6666666.640605.peg.3070</a>	yes
A and B	Protein Metabolism	Protein biosynthesis	Ribosome SSU bacterial	SSU ribosomal protein S3p (S3e)	<a href=&#39;?page=Annotation&feature=fig|6666666.640606.peg.1634&#39; target=_blank>fig|6666666.640606.peg.1634</a>	yes	<a href=&#39;?page=Annotation&feature=fig|6666666.640605.peg.3648&#39; target=_blank>fig|6666666.640605.peg.3648</a>	yes
A and B	Protein Metabolism	Protein biosynthesis	Ribosome SSU bacterial	SSU ribosomal protein S4p (S9e)	<a href=&#39;?page=Annotation&feature=fig|6666666.640606.peg.1654&#39; target=_blank>fig|6666666.640606.peg.1654</a>	yes	<a href=&#39;?page=Annotation&feature=fig|6666666.640605.peg.3668&#39; target=_blank>fig|6666666.640605.peg.3668</a>	yes
A and B	Protein Metabolism	Protein biosynthesis	Ribosome SSU bacterial	SSU ribosomal protein S5p (S2e)	<a href=&#39;?page=Annotation&feature=fig|6666666.640606.peg.1645&#39; target=_blank>fig|6666666.640606.peg.1645</a>	yes	<a href=&#39;?page=Annotation&feature=fig|6666666.640605.peg.3659&#39; target=_blank>fig|6666666.640605.peg.3659</a>	yes
A and B	Protein Metabolism	Protein biosynthesis	Ribosome SSU bacterial	SSU ribosomal protein S6p	<a href=&#39;?page=Annotation&feature=fig|6666666.640606.peg.3665&#39; target=_blank>fig|6666666.640606.peg.3665</a>	yes	<a href=&#39;?page=Annotation&feature=fig|6666666.640605.peg.3827&#39; target=_blank>fig|6666666.640605.peg.3827</a>	yes
A and B	Protein Metabolism	Protein biosynthesis	Ribosome SSU bacterial	SSU ribosomal protein S7p (S5e)	<a href=&#39;?page=Annotation&feature=fig|6666666.640606.peg.1625&#39; target=_blank>fig|6666666.640606.peg.1625</a>	yes	<a href=&#39;?page=Annotation&feature=fig|6666666.640605.peg.3639&#39; target=_blank>fig|6666666.640605.peg.3639</a>	yes
A and B	Protein Metabolism	Protein biosynthesis	Ribosome SSU bacterial	SSU ribosomal protein S8p (S15Ae)	<a href=&#39;?page=Annotation&feature=fig|6666666.640606.peg.1642&#39; target=_blank>fig|6666666.640606.peg.1642</a>	yes	<a href=&#39;?page=Annotation&feature=fig|6666666.640605.peg.3656&#39; target=_blank>fig|6666666.640605.peg.3656</a>	yes
A and B	Protein Metabolism	Protein biosynthesis	Ribosome SSU bacterial	SSU ribosomal protein S9p (S16e)	<a href=&#39;?page=Annotation&feature=fig|6666666.640606.peg.2886&#39; target=_blank>fig|6666666.640606.peg.2886</a>	yes	<a href=&#39;?page=Annotation&feature=fig|6666666.640605.peg.3069&#39; target=_blank>fig|6666666.640605.peg.3069</a>	yes
A and B	Protein Metabolism	Protein biosynthesis	Translation elongation factor G family	Translation elongation factor G	<a href=&#39;?page=Annotation&feature=fig|6666666.640606.peg.1626&#39; target=_blank>fig|6666666.640606.peg.1626</a>	yes	<a href=&#39;?page=Annotation&feature=fig|6666666.640605.peg.3640&#39; target=_blank>fig|6666666.640605.peg.3640</a>	yes
A and B	Protein Metabolism	Protein biosynthesis	Translation elongation factors bacterial	Translation elongation factor G	<a href=&#39;?page=Annotation&feature=fig|6666666.640606.peg.1626&#39; target=_blank>fig|6666666.640606.peg.1626</a>	yes	<a href=&#39;?page=Annotation&feature=fig|6666666.640605.peg.3640&#39; target=_blank>fig|6666666.640605.peg.3640</a>	yes
A and B	Protein Metabolism	Protein biosynthesis	Translation elongation factors bacterial	Translation elongation factor LepA	<a href=&#39;?page=Annotation&feature=fig|6666666.640606.peg.2696&#39; target=_blank>fig|6666666.640606.peg.2696</a>	yes	<a href=&#39;?page=Annotation&feature=fig|6666666.640605.peg.422&#39; target=_blank>fig|6666666.640605.peg.422</a>	yes
A and B	Protein Metabolism	Protein biosynthesis	Translation elongation factors bacterial	Translation elongation factor P	<a href=&#39;?page=Annotation&feature=fig|6666666.640606.peg.3246&#39; target=_blank>fig|6666666.640606.peg.3246</a>	yes	<a href=&#39;?page=Annotation&feature=fig|6666666.640605.peg.25&#39; target=_blank>fig|6666666.640605.peg.25</a>	yes
A and B	Protein Metabolism	Protein biosynthesis	Translation elongation factors bacterial	Translation elongation factor Ts	<a href=&#39;?page=Annotation&feature=fig|6666666.640606.peg.2888&#39; target=_blank>fig|6666666.640606.peg.2888</a>	yes	<a href=&#39;?page=Annotation&feature=fig|6666666.640605.peg.3071&#39; target=_blank>fig|6666666.640605.peg.3071</a>	yes
A and B	Protein Metabolism	Protein biosynthesis	Translation elongation factors bacterial	Translation elongation factor Tu	<a href=&#39;?page=Annotation&feature=fig|6666666.640606.peg.1614&#39; target=_blank>fig|6666666.640606.peg.1614</a>	yes	<a href=&#39;?page=Annotation&feature=fig|6666666.640605.peg.3628&#39; target=_blank>fig|6666666.640605.peg.3628</a>	yes
A and B	Protein Metabolism	Protein biosynthesis	Translation initiation factors bacterial	Methionyl-tRNA formyltransferase (EC 2.1.2.9)	<a href=&#39;?page=Annotation&feature=fig|6666666.640606.peg.692&#39; target=_blank>fig|6666666.640606.peg.692</a>	yes	<a href=&#39;?page=Annotation&feature=fig|6666666.640605.peg.48&#39; target=_blank>fig|6666666.640605.peg.48</a>	yes
A and B	Protein Metabolism	Protein biosynthesis	Translation initiation factors bacterial	Ribosome-binding factor A	<a href=&#39;?page=Annotation&feature=fig|6666666.640606.peg.2035&#39; target=_blank>fig|6666666.640606.peg.2035</a>	yes	<a href=&#39;?page=Annotation&feature=fig|6666666.640605.peg.718&#39; target=_blank>fig|6666666.640605.peg.718</a>	yes
A and B	Protein Metabolism	Protein biosynthesis	Translation initiation factors bacterial	Translation initiation factor 1	<a href=&#39;?page=Annotation&feature=fig|6666666.640606.peg.1650&#39; target=_blank>fig|6666666.640606.peg.1650</a>	yes	<a href=&#39;?page=Annotation&feature=fig|6666666.640605.peg.3664&#39; target=_blank>fig|6666666.640605.peg.3664</a>	yes
A and B	Protein Metabolism	Protein biosynthesis	Translation initiation factors bacterial	Translation initiation factor 2	<a href=&#39;?page=Annotation&feature=fig|6666666.640606.peg.1335&#39; target=_blank>fig|6666666.640606.peg.1335</a>	yes	<a href=&#39;?page=Annotation&feature=fig|6666666.640605.peg.3366&#39; target=_blank>fig|6666666.640605.peg.3366</a>	yes
A and B	Protein Metabolism	Protein biosynthesis	Translation initiation factors bacterial	Translation initiation factor 3	<a href=&#39;?page=Annotation&feature=fig|6666666.640606.peg.818&#39; target=_blank>fig|6666666.640606.peg.818</a>	yes	<a href=&#39;?page=Annotation&feature=fig|6666666.640605.peg.1868&#39; target=_blank>fig|6666666.640605.peg.1868</a>	yes
A and B	Protein Metabolism	Protein biosynthesis	Translation initiation factors bacterial	Translation initiation factor SUI1-related protein	<a href=&#39;?page=Annotation&feature=fig|6666666.640606.peg.703&#39; target=_blank>fig|6666666.640606.peg.703</a>	yes	<a href=&#39;?page=Annotation&feature=fig|6666666.640605.peg.3264&#39; target=_blank>fig|6666666.640605.peg.3264</a>	yes
A and B	Protein Metabolism	Protein biosynthesis	Translation termination factors bacterial	Methionine aminopeptidase (EC 3.4.11.18)	<a href=&#39;?page=Annotation&feature=fig|6666666.640606.peg.1649&#39; target=_blank>fig|6666666.640606.peg.1649</a>	yes	<a href=&#39;?page=Annotation&feature=fig|6666666.640605.peg.3663&#39; target=_blank>fig|6666666.640605.peg.3663</a>	yes
A and B	Protein Metabolism	Protein biosynthesis	Translation termination factors bacterial	Peptide chain release factor 1	<a href=&#39;?page=Annotation&feature=fig|6666666.640606.peg.1778&#39; target=_blank>fig|6666666.640606.peg.1778</a>	yes	<a href=&#39;?page=Annotation&feature=fig|6666666.640605.peg.594&#39; target=_blank>fig|6666666.640605.peg.594</a>	yes
A and B	Protein Metabolism	Protein biosynthesis	Translation termination factors bacterial	Peptide chain release factor 2	<a href=&#39;?page=Annotation&feature=fig|6666666.640606.peg.661&#39; target=_blank>fig|6666666.640606.peg.661</a>	yes	<a href=&#39;?page=Annotation&feature=fig|6666666.640605.peg.2588&#39; target=_blank>fig|6666666.640605.peg.2588</a>	yes
A and B	Protein Metabolism	Protein biosynthesis	Translation termination factors bacterial	Peptide chain release factor 3	<a href=&#39;?page=Annotation&feature=fig|6666666.640606.peg.2965&#39; target=_blank>fig|6666666.640606.peg.2965</a>	yes	<a href=&#39;?page=Annotation&feature=fig|6666666.640605.peg.1970&#39; target=_blank>fig|6666666.640605.peg.1970</a>	yes
A and B	Protein Metabolism	Protein biosynthesis	Translation termination factors bacterial	Peptide deformylase (EC 3.5.1.88)	<a href=&#39;?page=Annotation&feature=fig|6666666.640606.peg.3449&#39; target=_blank>fig|6666666.640606.peg.3449</a>	yes	<a href=&#39;?page=Annotation&feature=fig|6666666.640605.peg.3088&#39; target=_blank>fig|6666666.640605.peg.3088</a>	yes
A and B	Protein Metabolism	Protein biosynthesis	Translation termination factors bacterial	Peptide deformylase related protein	<a href=&#39;?page=Annotation&feature=fig|6666666.640606.peg.1578&#39; target=_blank>fig|6666666.640606.peg.1578</a>	yes	<a href=&#39;?page=Annotation&feature=fig|6666666.640605.peg.531&#39; target=_blank>fig|6666666.640605.peg.531</a>	yes
A and B	Protein Metabolism	Protein biosynthesis	Translation termination factors bacterial	Peptidyl-tRNA hydrolase (EC 3.1.1.29)	<a href=&#39;?page=Annotation&feature=fig|6666666.640606.peg.3655&#39; target=_blank>fig|6666666.640606.peg.3655</a>	yes	<a href=&#39;?page=Annotation&feature=fig|6666666.640605.peg.3835&#39; target=_blank>fig|6666666.640605.peg.3835</a>	yes
A and B	Protein Metabolism	Protein biosynthesis	Translation termination factors bacterial	Ribosome recycling factor	<a href=&#39;?page=Annotation&feature=fig|6666666.640606.peg.1610&#39; target=_blank>fig|6666666.640606.peg.1610</a>	yes	<a href=&#39;?page=Annotation&feature=fig|6666666.640605.peg.3624&#39; target=_blank>fig|6666666.640605.peg.3624</a>	yes
A and B	Protein Metabolism	Protein biosynthesis	Translation termination factors bacterial	tmRNA-binding protein SmpB	<a href=&#39;?page=Annotation&feature=fig|6666666.640606.peg.361&#39; target=_blank>fig|6666666.640606.peg.361</a>	yes	<a href=&#39;?page=Annotation&feature=fig|6666666.640605.peg.1225&#39; target=_blank>fig|6666666.640605.peg.1225</a>	yes
A and B	Protein Metabolism	Protein biosynthesis	tRNA aminoacylation, Ala	Alanyl-tRNA synthetase (EC 6.1.1.7)	<a href=&#39;?page=Annotation&feature=fig|6666666.640606.peg.718&#39; target=_blank>fig|6666666.640606.peg.718</a>	yes	<a href=&#39;?page=Annotation&feature=fig|6666666.640605.peg.2642&#39; target=_blank>fig|6666666.640605.peg.2642</a>	yes
A and B	Protein Metabolism	Protein biosynthesis	tRNA aminoacylation, Arg	Arginyl-tRNA synthetase (EC 6.1.1.19)	<a href=&#39;?page=Annotation&feature=fig|6666666.640606.peg.707&#39; target=_blank>fig|6666666.640606.peg.707</a>	yes	<a href=&#39;?page=Annotation&feature=fig|6666666.640605.peg.3260&#39; target=_blank>fig|6666666.640605.peg.3260</a>	yes
A and B	Protein Metabolism	Protein biosynthesis	tRNA aminoacylation, Asp and Asn	Asparaginyl-tRNA synthetase (EC 6.1.1.22)	<a href=&#39;?page=Annotation&feature=fig|6666666.640606.peg.125&#39; target=_blank>fig|6666666.640606.peg.125</a>	yes	<a href=&#39;?page=Annotation&feature=fig|6666666.640605.peg.1027&#39; target=_blank>fig|6666666.640605.peg.1027</a>	yes
A and B	Protein Metabolism	Protein biosynthesis	tRNA aminoacylation, Asp and Asn	Aspartyl-tRNA synthetase (EC 6.1.1.12)	<a href=&#39;?page=Annotation&feature=fig|6666666.640606.peg.3707&#39; target=_blank>fig|6666666.640606.peg.3707</a>	yes	<a href=&#39;?page=Annotation&feature=fig|6666666.640605.peg.3332&#39; target=_blank>fig|6666666.640605.peg.3332</a>	yes
A and B	Protein Metabolism	Protein biosynthesis	tRNA aminoacylation, Asp and Asn	Aspartyl-tRNA(Asn) amidotransferase subunit A (EC 6.3.5.6)	<a href=&#39;?page=Annotation&feature=fig|6666666.640606.peg.425&#39; target=_blank>fig|6666666.640606.peg.425</a>	yes	<a href=&#39;?page=Annotation&feature=fig|6666666.640605.peg.1466&#39; target=_blank>fig|6666666.640605.peg.1466</a>	yes
A and B	Protein Metabolism	Protein biosynthesis	tRNA aminoacylation, Asp and Asn	Aspartyl-tRNA(Asn) amidotransferase subunit B (EC 6.3.5.6)	<a href=&#39;?page=Annotation&feature=fig|6666666.640606.peg.719&#39; target=_blank>fig|6666666.640606.peg.719</a>	yes	<a href=&#39;?page=Annotation&feature=fig|6666666.640605.peg.2643&#39; target=_blank>fig|6666666.640605.peg.2643</a>	yes
A and B	Protein Metabolism	Protein biosynthesis	tRNA aminoacylation, Asp and Asn	Aspartyl-tRNA(Asn) amidotransferase subunit C (EC 6.3.5.6)	<a href=&#39;?page=Annotation&feature=fig|6666666.640606.peg.592&#39; target=_blank>fig|6666666.640606.peg.592</a>	yes	<a href=&#39;?page=Annotation&feature=fig|6666666.640605.peg.2595&#39; target=_blank>fig|6666666.640605.peg.2595</a>	yes
A and B	Protein Metabolism	Protein biosynthesis	tRNA aminoacylation, Cys	Cysteinyl-tRNA synthetase (EC 6.1.1.16)	<a href=&#39;?page=Annotation&feature=fig|6666666.640606.peg.166&#39; target=_blank>fig|6666666.640606.peg.166</a>	yes	<a href=&#39;?page=Annotation&feature=fig|6666666.640605.peg.1119&#39; target=_blank>fig|6666666.640605.peg.1119</a>	yes
A and B	Protein Metabolism	Protein biosynthesis	tRNA aminoacylation, Glu and Gln	Glutaminyl-tRNA synthetase (EC 6.1.1.18)	<a href=&#39;?page=Annotation&feature=fig|6666666.640606.peg.857&#39; target=_blank>fig|6666666.640606.peg.857</a>	yes	<a href=&#39;?page=Annotation&feature=fig|6666666.640605.peg.1797&#39; target=_blank>fig|6666666.640605.peg.1797</a>	yes
A and B	Protein Metabolism	Protein biosynthesis	tRNA aminoacylation, Glu and Gln	Glutamyl-tRNA synthetase (EC 6.1.1.17)	<a href=&#39;?page=Annotation&feature=fig|6666666.640606.peg.1420&#39; target=_blank>fig|6666666.640606.peg.1420</a>	yes	<a href=&#39;?page=Annotation&feature=fig|6666666.640605.peg.2123&#39; target=_blank>fig|6666666.640605.peg.2123</a>	yes
A and B	Protein Metabolism	Protein biosynthesis	tRNA aminoacylation, Glu and Gln	Glutamyl-tRNA(Gln) amidotransferase subunit A (EC 6.3.5.7)	<a href=&#39;?page=Annotation&feature=fig|6666666.640606.peg.425&#39; target=_blank>fig|6666666.640606.peg.425</a>	yes	<a href=&#39;?page=Annotation&feature=fig|6666666.640605.peg.1466&#39; target=_blank>fig|6666666.640605.peg.1466</a>	yes
A and B	Protein Metabolism	Protein biosynthesis	tRNA aminoacylation, Glu and Gln	Glutamyl-tRNA(Gln) amidotransferase subunit B (EC 6.3.5.7)	<a href=&#39;?page=Annotation&feature=fig|6666666.640606.peg.719&#39; target=_blank>fig|6666666.640606.peg.719</a>	yes	<a href=&#39;?page=Annotation&feature=fig|6666666.640605.peg.2643&#39; target=_blank>fig|6666666.640605.peg.2643</a>	yes
A and B	Protein Metabolism	Protein biosynthesis	tRNA aminoacylation, Glu and Gln	Glutamyl-tRNA(Gln) amidotransferase subunit C (EC 6.3.5.7)	<a href=&#39;?page=Annotation&feature=fig|6666666.640606.peg.592&#39; target=_blank>fig|6666666.640606.peg.592</a>	yes	<a href=&#39;?page=Annotation&feature=fig|6666666.640605.peg.2595&#39; target=_blank>fig|6666666.640605.peg.2595</a>	yes
A and B	Protein Metabolism	Protein biosynthesis	tRNA aminoacylation, Glu and Gln	Glutamyl-tRNA(Gln) synthetase (EC 6.1.1.24)	<a href=&#39;?page=Annotation&feature=fig|6666666.640606.peg.1420&#39; target=_blank>fig|6666666.640606.peg.1420</a>	yes	<a href=&#39;?page=Annotation&feature=fig|6666666.640605.peg.2123&#39; target=_blank>fig|6666666.640605.peg.2123</a>	yes
A and B	Protein Metabolism	Protein biosynthesis	tRNA aminoacylation, Gly	Glycyl-tRNA synthetase (EC 6.1.1.14)	<a href=&#39;?page=Annotation&feature=fig|6666666.640606.peg.1805&#39; target=_blank>fig|6666666.640606.peg.1805</a>	yes	<a href=&#39;?page=Annotation&feature=fig|6666666.640605.peg.625&#39; target=_blank>fig|6666666.640605.peg.625</a>	yes
A and B	Protein Metabolism	Protein biosynthesis	tRNA aminoacylation, His	Histidyl-tRNA synthetase (EC 6.1.1.21)	<a href=&#39;?page=Annotation&feature=fig|6666666.640606.peg.3640&#39; target=_blank>fig|6666666.640606.peg.3640</a>	yes	<a href=&#39;?page=Annotation&feature=fig|6666666.640605.peg.3778&#39; target=_blank>fig|6666666.640605.peg.3778</a>	yes
A and B	Protein Metabolism	Protein biosynthesis	tRNA aminoacylation, Ile	Isoleucyl-tRNA synthetase (EC 6.1.1.5)	<a href=&#39;?page=Annotation&feature=fig|6666666.640606.peg.1198&#39; target=_blank>fig|6666666.640606.peg.1198</a>	yes	<a href=&#39;?page=Annotation&feature=fig|6666666.640605.peg.678&#39; target=_blank>fig|6666666.640605.peg.678</a>	yes
A and B	Protein Metabolism	Protein biosynthesis	tRNA aminoacylation, Leu	Leucyl-tRNA synthetase (EC 6.1.1.4)	<a href=&#39;?page=Annotation&feature=fig|6666666.640606.peg.230&#39; target=_blank>fig|6666666.640606.peg.230</a>	yes	<a href=&#39;?page=Annotation&feature=fig|6666666.640605.peg.1262&#39; target=_blank>fig|6666666.640605.peg.1262</a>	yes
A and B	Protein Metabolism	Protein biosynthesis	tRNA aminoacylation, Lys	Lysyl-tRNA synthetase (class II) (EC 6.1.1.6)	<a href=&#39;?page=Annotation&feature=fig|6666666.640606.peg.585&#39; target=_blank>fig|6666666.640606.peg.585</a>	yes	<a href=&#39;?page=Annotation&feature=fig|6666666.640605.peg.319&#39; target=_blank>fig|6666666.640605.peg.319</a>	yes
A and B	Protein Metabolism	Protein biosynthesis	tRNA aminoacylation, Met	Methionyl-tRNA synthetase (EC 6.1.1.10)	<a href=&#39;?page=Annotation&feature=fig|6666666.640606.peg.3218&#39; target=_blank>fig|6666666.640606.peg.3218</a>	yes	<a href=&#39;?page=Annotation&feature=fig|6666666.640605.peg.450&#39; target=_blank>fig|6666666.640605.peg.450</a>	yes
A and B	Protein Metabolism	Protein biosynthesis	tRNA aminoacylation, Phe	Phenylalanyl-tRNA synthetase alpha chain (EC 6.1.1.20)	<a href=&#39;?page=Annotation&feature=fig|6666666.640606.peg.1998&#39; target=_blank>fig|6666666.640606.peg.1998</a>	yes	<a href=&#39;?page=Annotation&feature=fig|6666666.640605.peg.565&#39; target=_blank>fig|6666666.640605.peg.565</a>	yes
A and B	Protein Metabolism	Protein biosynthesis	tRNA aminoacylation, Phe	Phenylalanyl-tRNA synthetase beta chain (EC 6.1.1.20)	<a href=&#39;?page=Annotation&feature=fig|6666666.640606.peg.2853&#39; target=_blank>fig|6666666.640606.peg.2853</a>	yes	<a href=&#39;?page=Annotation&feature=fig|6666666.640605.peg.3038&#39; target=_blank>fig|6666666.640605.peg.3038</a>	yes
A and B	Protein Metabolism	Protein biosynthesis	tRNA aminoacylation, Pro	Prolyl-tRNA synthetase (EC 6.1.1.15), archaeal/eukaryal type	<a href=&#39;?page=Annotation&feature=fig|6666666.640606.peg.2362&#39; target=_blank>fig|6666666.640606.peg.2362</a>	yes	<a href=&#39;?page=Annotation&feature=fig|6666666.640605.peg.359&#39; target=_blank>fig|6666666.640605.peg.359</a>	yes
A and B	Protein Metabolism	Protein biosynthesis	tRNA aminoacylation, Ser	Seryl-tRNA synthetase (EC 6.1.1.11)	<a href=&#39;?page=Annotation&feature=fig|6666666.640606.peg.1361&#39; target=_blank>fig|6666666.640606.peg.1361</a>	yes	<a href=&#39;?page=Annotation&feature=fig|6666666.640605.peg.3390&#39; target=_blank>fig|6666666.640605.peg.3390</a>	yes
A and B	Protein Metabolism	Protein biosynthesis	tRNA aminoacylation, Thr	Threonyl-tRNA synthetase (EC 6.1.1.3)	<a href=&#39;?page=Annotation&feature=fig|6666666.640606.peg.817&#39; target=_blank>fig|6666666.640606.peg.817</a>	yes	<a href=&#39;?page=Annotation&feature=fig|6666666.640605.peg.1869&#39; target=_blank>fig|6666666.640605.peg.1869</a>	yes
A and B	Protein Metabolism	Protein biosynthesis	tRNA aminoacylation, Trp	Tryptophanyl-tRNA synthetase (EC 6.1.1.2)	<a href=&#39;?page=Annotation&feature=fig|6666666.640606.peg.2264&#39; target=_blank>fig|6666666.640606.peg.2264</a>	yes	<a href=&#39;?page=Annotation&feature=fig|6666666.640605.peg.15&#39; target=_blank>fig|6666666.640605.peg.15</a>	yes
A and B	Protein Metabolism	Protein biosynthesis	tRNA aminoacylation, Tyr	Tyrosyl-tRNA synthetase (EC 6.1.1.1)	<a href=&#39;?page=Annotation&feature=fig|6666666.640606.peg.2224&#39; target=_blank>fig|6666666.640606.peg.2224</a>	yes	<a href=&#39;?page=Annotation&feature=fig|6666666.640605.peg.1683&#39; target=_blank>fig|6666666.640605.peg.1683</a>	yes
A and B	Protein Metabolism	Protein biosynthesis	tRNA aminoacylation, Val	Valyl-tRNA synthetase (EC 6.1.1.9)	<a href=&#39;?page=Annotation&feature=fig|6666666.640606.peg.2684&#39; target=_blank>fig|6666666.640606.peg.2684</a>	yes	<a href=&#39;?page=Annotation&feature=fig|6666666.640605.peg.3803&#39; target=_blank>fig|6666666.640605.peg.3803</a>	yes
A and B	Protein Metabolism	Protein degradation	Aminopeptidases (EC 3.4.11.-)	Aminopeptidase Y (Arg, Lys, Leu preference) (EC 3.4.11.15)	<a href=&#39;?page=Annotation&feature=fig|6666666.640606.peg.165&#39; target=_blank>fig|6666666.640606.peg.165</a>	yes	<a href=&#39;?page=Annotation&feature=fig|6666666.640605.peg.1118&#39; target=_blank>fig|6666666.640605.peg.1118</a>	yes
A and B	Protein Metabolism	Protein degradation	Aminopeptidases (EC 3.4.11.-)	Cytosol aminopeptidase PepA (EC 3.4.11.1)	<a href=&#39;?page=Annotation&feature=fig|6666666.640606.peg.601&#39; target=_blank>fig|6666666.640606.peg.601</a>	yes	<a href=&#39;?page=Annotation&feature=fig|6666666.640605.peg.1619&#39; target=_blank>fig|6666666.640605.peg.1619</a>	yes
A and B	Protein Metabolism	Protein degradation	Aminopeptidases (EC 3.4.11.-)	Xaa-Pro aminopeptidase (EC 3.4.11.9)	<a href=&#39;?page=Annotation&feature=fig|6666666.640606.peg.79&#39; target=_blank>fig|6666666.640606.peg.79</a>, <a href=&#39;?page=Annotation&feature=fig|6666666.640606.peg.2168&#39; target=_blank>fig|6666666.640606.peg.2168</a>, <a href=&#39;?page=Annotation&feature=fig|6666666.640606.peg.3421&#39; target=_blank>fig|6666666.640606.peg.3421</a>	yes	<a href=&#39;?page=Annotation&feature=fig|6666666.640605.peg.3072&#39; target=_blank>fig|6666666.640605.peg.3072</a>	yes
A and B	Protein Metabolism	Protein degradation	Metallocarboxypeptidases (EC 3.4.17.-)	D-alanyl-D-alanine carboxypeptidase (EC 3.4.16.4)	<a href=&#39;?page=Annotation&feature=fig|6666666.640606.peg.2431&#39; target=_blank>fig|6666666.640606.peg.2431</a>, <a href=&#39;?page=Annotation&feature=fig|6666666.640606.peg.3146&#39; target=_blank>fig|6666666.640606.peg.3146</a>	yes	<a href=&#39;?page=Annotation&feature=fig|6666666.640605.peg.1045&#39; target=_blank>fig|6666666.640605.peg.1045</a>, <a href=&#39;?page=Annotation&feature=fig|6666666.640605.peg.2443&#39; target=_blank>fig|6666666.640605.peg.2443</a>, <a href=&#39;?page=Annotation&feature=fig|6666666.640605.peg.2777&#39; target=_blank>fig|6666666.640605.peg.2777</a>, <a href=&#39;?page=Annotation&feature=fig|666…	yes
A and B	Protein Metabolism	Protein degradation	Metallocarboxypeptidases (EC 3.4.17.-)	Muramoyltetrapeptide carboxypeptidase (EC 3.4.17.13)	<a href=&#39;?page=Annotation&feature=fig|6666666.640606.peg.2435&#39; target=_blank>fig|6666666.640606.peg.2435</a>	yes	<a href=&#39;?page=Annotation&feature=fig|6666666.640605.peg.2781&#39; target=_blank>fig|6666666.640605.peg.2781</a>	yes
A and B	Protein Metabolism	Protein degradation	Omega peptidases (EC 3.4.19.-)	Acylamino-acid-releasing enzyme (EC 3.4.19.1)	<a href=&#39;?page=Annotation&feature=fig|6666666.640606.peg.902&#39; target=_blank>fig|6666666.640606.peg.902</a>, <a href=&#39;?page=Annotation&feature=fig|6666666.640606.peg.1089&#39; target=_blank>fig|6666666.640606.peg.1089</a>	yes	<a href=&#39;?page=Annotation&feature=fig|6666666.640605.peg.2042&#39; target=_blank>fig|6666666.640605.peg.2042</a>	yes
A and B	Protein Metabolism	Protein degradation	Protein degradation	Deblocking aminopeptidase (EC 3.4.11.-)	<a href=&#39;?page=Annotation&feature=fig|6666666.640606.peg.2687&#39; target=_blank>fig|6666666.640606.peg.2687</a>	yes	<a href=&#39;?page=Annotation&feature=fig|6666666.640605.peg.416&#39; target=_blank>fig|6666666.640605.peg.416</a>	yes
A and B	Protein Metabolism	Protein degradation	Protein degradation	Dipeptidyl carboxypeptidase Dcp (EC 3.4.15.5)	<a href=&#39;?page=Annotation&feature=fig|6666666.640606.peg.474&#39; target=_blank>fig|6666666.640606.peg.474</a>	yes	<a href=&#39;?page=Annotation&feature=fig|6666666.640605.peg.137&#39; target=_blank>fig|6666666.640605.peg.137</a>	yes
A and B	Protein Metabolism	Protein degradation	Proteolysis in bacteria, ATP-dependent	ATP-dependent Clp protease ATP-binding subunit ClpX	<a href=&#39;?page=Annotation&feature=fig|6666666.640606.peg.3111&#39; target=_blank>fig|6666666.640606.peg.3111</a>	yes	<a href=&#39;?page=Annotation&feature=fig|6666666.640605.peg.1275&#39; target=_blank>fig|6666666.640605.peg.1275</a>	yes
A and B	Protein Metabolism	Protein degradation	Proteolysis in bacteria, ATP-dependent	ATP-dependent Clp protease, ATP-binding subunit ClpC	<a href=&#39;?page=Annotation&feature=fig|6666666.640606.peg.3026&#39; target=_blank>fig|6666666.640606.peg.3026</a>	yes	<a href=&#39;?page=Annotation&feature=fig|6666666.640605.peg.1210&#39; target=_blank>fig|6666666.640605.peg.1210</a>	yes
A and B	Protein Metabolism	Protein degradation	Proteolysis in bacteria, ATP-dependent	ATP-dependent hsl protease ATP-binding subunit HslU	<a href=&#39;?page=Annotation&feature=fig|6666666.640606.peg.3105&#39; target=_blank>fig|6666666.640606.peg.3105</a>	yes	<a href=&#39;?page=Annotation&feature=fig|6666666.640605.peg.1372&#39; target=_blank>fig|6666666.640605.peg.1372</a>	yes
A and B	Protein Metabolism	Protein degradation	Proteolysis in bacteria, ATP-dependent	ATP-dependent protease La (EC 3.4.21.53) Type I	<a href=&#39;?page=Annotation&feature=fig|6666666.640606.peg.3104&#39; target=_blank>fig|6666666.640606.peg.3104</a>	yes	<a href=&#39;?page=Annotation&feature=fig|6666666.640605.peg.1371&#39; target=_blank>fig|6666666.640605.peg.1371</a>	yes
A and B	Protein Metabolism	Protein degradation	Proteolysis in bacteria, ATP-dependent	DNA repair protein RadA	<a href=&#39;?page=Annotation&feature=fig|6666666.640606.peg.1941&#39; target=_blank>fig|6666666.640606.peg.1941</a>	yes	<a href=&#39;?page=Annotation&feature=fig|6666666.640605.peg.2877&#39; target=_blank>fig|6666666.640605.peg.2877</a>	yes
B	Protein Metabolism	Protein degradation	Putative TldE-TldD proteolytic complex	TldD family protein, Actinobacterial subgroup	<input type=&#39;button&#39; value=&#39;find&#39; onclick=&#39;window.open("?page=SearchGene&fr=TldD family protein, Actinobacterial subgroup&organism=6666666.640606&subsystem=Putative_TldE-TldD_proteolytic_complex&template_gene=fig|6666666.640605.peg.2931");&#39;>	no	<a href=&#39;?page=Annotation&feature=fig|6666666.640605.peg.2931&#39; target=_blank>fig|6666666.640605.peg.2931</a>	yes
B	Protein Metabolism	Protein degradation	Putative TldE-TldD proteolytic complex	TldE/PmbA family protein, Actinobacterial subgroup	<input type=&#39;button&#39; value=&#39;find&#39; onclick=&#39;window.open("?page=SearchGene&fr=TldE/PmbA family protein, Actinobacterial subgroup&organism=6666666.640606&subsystem=Putative_TldE-TldD_proteolytic_complex&template_gene=fig|6666666.640605.peg.2930");&#39;>	no	<a href=&#39;?page=Annotation&feature=fig|6666666.640605.peg.2930&#39; target=_blank>fig|6666666.640605.peg.2930</a>	yes
A and B	Protein Metabolism	Protein folding	Peptidyl-prolyl cis-trans isomerase	FKBP-type peptidyl-prolyl cis-trans isomerase SlyD (EC 5.2.1.8)	<a href=&#39;?page=Annotation&feature=fig|6666666.640606.peg.381&#39; target=_blank>fig|6666666.640606.peg.381</a>, <a href=&#39;?page=Annotation&feature=fig|6666666.640606.peg.2068&#39; target=_blank>fig|6666666.640606.peg.2068</a>, <a href=&#39;?page=Annotation&feature=fig|6666666.640606.peg.3627&#39; target=_blank>fig|6666666.640606.peg.3627</a>	yes	<a href=&#39;?page=Annotation&feature=fig|6666666.640605.peg.654&#39; target=_blank>fig|6666666.640605.peg.654</a>, <a href=&#39;?page=Annotation&feature=fig|6666666.640605.peg.1428&#39; target=_blank>fig|6666666.640605.peg.1428</a>, <a href=&#39;?page=Annotation&feature=fig|6666666.640605.peg.3795&#39; target=_blank>fig|6666666.640605.peg.3795</a>	yes
A and B	Protein Metabolism	Protein folding	Periplasmic disulfide interchange	Cytochrome c-type biogenesis protein DsbD, protein-disulfide reductase (EC 1.8.1.8)	<a href=&#39;?page=Annotation&feature=fig|6666666.640606.peg.1310&#39; target=_blank>fig|6666666.640606.peg.1310</a>	yes	<a href=&#39;?page=Annotation&feature=fig|6666666.640605.peg.839&#39; target=_blank>fig|6666666.640605.peg.839</a>	yes
A and B	Protein Metabolism	Protein folding	Protein chaperones	Chaperone protein DnaJ	<a href=&#39;?page=Annotation&feature=fig|6666666.640606.peg.2971&#39; target=_blank>fig|6666666.640606.peg.2971</a>	yes	<a href=&#39;?page=Annotation&feature=fig|6666666.640605.peg.1976&#39; target=_blank>fig|6666666.640605.peg.1976</a>	yes
A and B	Protein Metabolism	Protein folding	Protein chaperones	Chaperone protein DnaK	<a href=&#39;?page=Annotation&feature=fig|6666666.640606.peg.26&#39; target=_blank>fig|6666666.640606.peg.26</a>, <a href=&#39;?page=Annotation&feature=fig|6666666.640606.peg.2819&#39; target=_blank>fig|6666666.640606.peg.2819</a>	yes	<a href=&#39;?page=Annotation&feature=fig|6666666.640605.peg.923&#39; target=_blank>fig|6666666.640605.peg.923</a>	yes
A and B	Protein Metabolism	Protein folding	Protein chaperones	Chaperone protein HtpG	<a href=&#39;?page=Annotation&feature=fig|6666666.640606.peg.1080&#39; target=_blank>fig|6666666.640606.peg.1080</a>	yes	<a href=&#39;?page=Annotation&feature=fig|6666666.640605.peg.2160&#39; target=_blank>fig|6666666.640605.peg.2160</a>	yes
A and B	Protein Metabolism	Protein folding	Protein chaperones	Heat shock protein GrpE	<a href=&#39;?page=Annotation&feature=fig|6666666.640606.peg.2972&#39; target=_blank>fig|6666666.640606.peg.2972</a>	yes	<a href=&#39;?page=Annotation&feature=fig|6666666.640605.peg.1977&#39; target=_blank>fig|6666666.640605.peg.1977</a>	yes
A and B	Protein Metabolism	Protein processing and modification	Modification of eukaryotic initiation factor 5A	Deoxyhypusine synthase (EC 2.5.1.46)	<a href=&#39;?page=Annotation&feature=fig|6666666.640606.peg.2214&#39; target=_blank>fig|6666666.640606.peg.2214</a>	yes	<a href=&#39;?page=Annotation&feature=fig|6666666.640605.peg.1693&#39; target=_blank>fig|6666666.640605.peg.1693</a>	yes
A and B	Protein Metabolism	Protein processing and modification	Modification of eukaryotic initiation factor 5A	Translation elongation factor P	<a href=&#39;?page=Annotation&feature=fig|6666666.640606.peg.3246&#39; target=_blank>fig|6666666.640606.peg.3246</a>	yes	<a href=&#39;?page=Annotation&feature=fig|6666666.640605.peg.25&#39; target=_blank>fig|6666666.640605.peg.25</a>	yes
A and B	Protein Metabolism	Protein processing and modification	N-linked Glycosylation in Bacteria	4-keto-6-deoxy-N-Acetyl-D-hexosaminyl-(Lipid carrier) aminotransferase	<a href=&#39;?page=Annotation&feature=fig|6666666.640606.peg.444&#39; target=_blank>fig|6666666.640606.peg.444</a>	yes	<a href=&#39;?page=Annotation&feature=fig|6666666.640605.peg.2552&#39; target=_blank>fig|6666666.640605.peg.2552</a>	yes
A and B	Protein Metabolism	Protein processing and modification	N-linked Glycosylation in Bacteria	Alpha-1,3-N-acetylgalactosamine transferase PglA (EC 2.4.1.-)	<a href=&#39;?page=Annotation&feature=fig|6666666.640606.peg.723&#39; target=_blank>fig|6666666.640606.peg.723</a>	yes	<a href=&#39;?page=Annotation&feature=fig|6666666.640605.peg.2650&#39; target=_blank>fig|6666666.640605.peg.2650</a>	yes
A and B	Protein Metabolism	Protein processing and modification	N-linked Glycosylation in Bacteria	Lipid carrier : UDP-N-acetylgalactosaminyltransferase (EC 2.4.1.-)	<a href=&#39;?page=Annotation&feature=fig|6666666.640606.peg.445&#39; target=_blank>fig|6666666.640606.peg.445</a>	yes	<a href=&#39;?page=Annotation&feature=fig|6666666.640605.peg.2553&#39; target=_blank>fig|6666666.640605.peg.2553</a>	yes
A and B	Protein Metabolism	Protein processing and modification	N-linked Glycosylation in Bacteria	Phospholipid-lipopolysaccharide ABC transporter	<a href=&#39;?page=Annotation&feature=fig|6666666.640606.peg.2569&#39; target=_blank>fig|6666666.640606.peg.2569</a>, <a href=&#39;?page=Annotation&feature=fig|6666666.640606.peg.2589&#39; target=_blank>fig|6666666.640606.peg.2589</a>	yes	<a href=&#39;?page=Annotation&feature=fig|6666666.640605.peg.2338&#39; target=_blank>fig|6666666.640605.peg.2338</a>	yes
A and B	Protein Metabolism	Protein processing and modification	N-linked Glycosylation in Bacteria	UDP-glucose 4-epimerase (EC 5.1.3.2)	<a href=&#39;?page=Annotation&feature=fig|6666666.640606.peg.259&#39; target=_blank>fig|6666666.640606.peg.259</a>, <a href=&#39;?page=Annotation&feature=fig|6666666.640606.peg.2555&#39; target=_blank>fig|6666666.640606.peg.2555</a>, <a href=&#39;?page=Annotation&feature=fig|6666666.640606.peg.3265&#39; target=_blank>fig|6666666.640606.peg.3265</a>	yes	<a href=&#39;?page=Annotation&feature=fig|6666666.640605.peg.1389&#39; target=_blank>fig|6666666.640605.peg.1389</a>, <a href=&#39;?page=Annotation&feature=fig|6666666.640605.peg.2359&#39; target=_blank>fig|6666666.640605.peg.2359</a>, <a href=&#39;?page=Annotation&feature=fig|6666666.640605.peg.2537&#39; target=_blank>fig|6666666.640605.peg.2537</a>, <a href=&#39;?page=Annotation&feature=fig|666…	yes
A and B	Protein Metabolism	Protein processing and modification	Protein-L-isoaspartate O-methyltransferase	Protein-L-isoaspartate O-methyltransferase (EC 2.1.1.77)	<a href=&#39;?page=Annotation&feature=fig|6666666.640606.peg.739&#39; target=_blank>fig|6666666.640606.peg.739</a>	yes	<a href=&#39;?page=Annotation&feature=fig|6666666.640605.peg.1391&#39; target=_blank>fig|6666666.640605.peg.1391</a>, <a href=&#39;?page=Annotation&feature=fig|6666666.640605.peg.1731&#39; target=_blank>fig|6666666.640605.peg.1731</a>	yes
A and B	Protein Metabolism	Protein processing and modification	Signal peptidase	Lipoprotein signal peptidase (EC 3.4.23.36)	<a href=&#39;?page=Annotation&feature=fig|6666666.640606.peg.1197&#39; target=_blank>fig|6666666.640606.peg.1197</a>	yes	<a href=&#39;?page=Annotation&feature=fig|6666666.640605.peg.679&#39; target=_blank>fig|6666666.640605.peg.679</a>	yes
A and B	Protein Metabolism	Protein processing and modification	Signal peptidase	Signal peptidase I (EC 3.4.21.89)	<a href=&#39;?page=Annotation&feature=fig|6666666.640606.peg.3671&#39; target=_blank>fig|6666666.640606.peg.3671</a>	yes	<a href=&#39;?page=Annotation&feature=fig|6666666.640605.peg.3821&#39; target=_blank>fig|6666666.640605.peg.3821</a>	yes
A	Protein Metabolism	Protein processing and modification	N-linked Glycosylation in Bacteria	Alpha-1,4-N-acetylgalactosamine transferase PglH (EC 2.4.1.-)	<a href=&#39;?page=Annotation&feature=fig|6666666.640606.peg.2563&#39; target=_blank>fig|6666666.640606.peg.2563</a>	yes	<input type=&#39;button&#39; class=&#39;button&#39; value=&#39;find&#39; onclick=&#39;window.open("?page=SearchGene&fr=Alpha-1,4-N-acetylgalactosamine transferase PglH (EC 2.4.1.-)&organism=6666666.640605&subsystem=N-linked_Glycosylation_in_Bacteria&template_gene=fig|6666666.640606.peg.2563");&#39;>	no
B	Protein Metabolism	Protein processing and modification	Protein deglycation	Ribulosamine/erythrulosamine 3-kinase potentially involved in protein deglycation	<input type=&#39;button&#39; value=&#39;find&#39; onclick=&#39;window.open("?page=SearchGene&fr=Ribulosamine/erythrulosamine 3-kinase potentially involved in protein deglycation&organism=6666666.640606&subsystem=Protein_deglycation&template_gene=fig|6666666.640605.peg.2005");&#39;>	no	<a href=&#39;?page=Annotation&feature=fig|6666666.640605.peg.2005&#39; target=_blank>fig|6666666.640605.peg.2005</a>	yes
A and B	Protein Metabolism	Selenoproteins	Selenocysteine metabolism	Selenide,water dikinase (EC 2.7.9.3)	<a href=&#39;?page=Annotation&feature=fig|6666666.640606.peg.2953&#39; target=_blank>fig|6666666.640606.peg.2953</a>	yes	<a href=&#39;?page=Annotation&feature=fig|6666666.640605.peg.1956&#39; target=_blank>fig|6666666.640605.peg.1956</a>	yes
A and B	Protein Metabolism	Selenoproteins	Selenocysteine metabolism	Selenophosphate-dependent tRNA 2-selenouridine synthase	<a href=&#39;?page=Annotation&feature=fig|6666666.640606.peg.2952&#39; target=_blank>fig|6666666.640606.peg.2952</a>	yes	<a href=&#39;?page=Annotation&feature=fig|6666666.640605.peg.1955&#39; target=_blank>fig|6666666.640605.peg.1955</a>	yes
A and B	RNA Metabolism	RNA processing and modification	RNA methylation	SSU rRNA (adenine(1518)-N(6)/adenine(1519)-N(6))-dimethyltransferase (EC 2.1.1.182)	<a href=&#39;?page=Annotation&feature=fig|6666666.640606.peg.3252&#39; target=_blank>fig|6666666.640606.peg.3252</a>	yes	<a href=&#39;?page=Annotation&feature=fig|6666666.640605.peg.20&#39; target=_blank>fig|6666666.640605.peg.20</a>	yes
A and B	RNA Metabolism	RNA processing and modification	RNA methylation	tRNA (5-methylaminomethyl-2-thiouridylate)-methyltransferase (EC 2.1.1.61)	<a href=&#39;?page=Annotation&feature=fig|6666666.640606.peg.938&#39; target=_blank>fig|6666666.640606.peg.938</a>	yes	<a href=&#39;?page=Annotation&feature=fig|6666666.640605.peg.2071&#39; target=_blank>fig|6666666.640605.peg.2071</a>	yes
A and B	RNA Metabolism	RNA processing and modification	RNA methylation	tRNA (guanosine(18)-2&#39;-O)-methyltransferase (EC 2.1.1.34)	<a href=&#39;?page=Annotation&feature=fig|6666666.640606.peg.2232&#39; target=_blank>fig|6666666.640606.peg.2232</a>	yes	<a href=&#39;?page=Annotation&feature=fig|6666666.640605.peg.1749&#39; target=_blank>fig|6666666.640605.peg.1749</a>	yes
A and B	RNA Metabolism	RNA processing and modification	RNA processing and degradation, bacterial	3&#39;-to-5&#39; exoribonuclease RNase R	<a href=&#39;?page=Annotation&feature=fig|6666666.640606.peg.3468&#39; target=_blank>fig|6666666.640606.peg.3468</a>	yes	<a href=&#39;?page=Annotation&feature=fig|6666666.640605.peg.3139&#39; target=_blank>fig|6666666.640605.peg.3139</a>	yes
A and B	RNA Metabolism	RNA processing and modification	RNA processing and degradation, bacterial	Ribonuclease III (EC 3.1.26.3)	<a href=&#39;?page=Annotation&feature=fig|6666666.640606.peg.484&#39; target=_blank>fig|6666666.640606.peg.484</a>	yes	<a href=&#39;?page=Annotation&feature=fig|6666666.640605.peg.127&#39; target=_blank>fig|6666666.640605.peg.127</a>	yes
A and B	RNA Metabolism	RNA processing and modification	Ribonuclease H	Ribonuclease HI (EC 3.1.26.4)	<a href=&#39;?page=Annotation&feature=fig|6666666.640606.peg.1600&#39; target=_blank>fig|6666666.640606.peg.1600</a>	yes	<a href=&#39;?page=Annotation&feature=fig|6666666.640605.peg.3457&#39; target=_blank>fig|6666666.640605.peg.3457</a>	yes
A and B	RNA Metabolism	RNA processing and modification	Ribonuclease H	Ribonuclease HII (EC 3.1.26.4)	<a href=&#39;?page=Annotation&feature=fig|6666666.640606.peg.365&#39; target=_blank>fig|6666666.640606.peg.365</a>	yes	<a href=&#39;?page=Annotation&feature=fig|6666666.640605.peg.1411&#39; target=_blank>fig|6666666.640605.peg.1411</a>	yes
A and B	RNA Metabolism	RNA processing and modification	Ribonucleases in Bacillus	Metallo-beta-lactamase family protein, RNA-specific	<a href=&#39;?page=Annotation&feature=fig|6666666.640606.peg.349&#39; target=_blank>fig|6666666.640606.peg.349</a>	yes	<a href=&#39;?page=Annotation&feature=fig|6666666.640605.peg.1212&#39; target=_blank>fig|6666666.640605.peg.1212</a>	yes
A and B	RNA Metabolism	RNA processing and modification	Ribonucleases in Bacillus	Ribonuclease HII (EC 3.1.26.4)	<a href=&#39;?page=Annotation&feature=fig|6666666.640606.peg.365&#39; target=_blank>fig|6666666.640606.peg.365</a>	yes	<a href=&#39;?page=Annotation&feature=fig|6666666.640605.peg.1411&#39; target=_blank>fig|6666666.640605.peg.1411</a>	yes
A and B	RNA Metabolism	RNA processing and modification	mnm5U34 biosynthesis bacteria	Cysteine desulfurase (EC 2.8.1.7)	<a href=&#39;?page=Annotation&feature=fig|6666666.640606.peg.852&#39; target=_blank>fig|6666666.640606.peg.852</a>, <a href=&#39;?page=Annotation&feature=fig|6666666.640606.peg.875&#39; target=_blank>fig|6666666.640606.peg.875</a>, <a href=&#39;?page=Annotation&feature=fig|6666666.640606.peg.1817&#39; target=_blank>fig|6666666.640606.peg.1817</a>, <a href=&#39;?page=Annotation&feature=fig|6666666…	yes	<a href=&#39;?page=Annotation&feature=fig|6666666.640605.peg.284&#39; target=_blank>fig|6666666.640605.peg.284</a>, <a href=&#39;?page=Annotation&feature=fig|6666666.640605.peg.1779&#39; target=_blank>fig|6666666.640605.peg.1779</a>, <a href=&#39;?page=Annotation&feature=fig|6666666.640605.peg.1799&#39; target=_blank>fig|6666666.640605.peg.1799</a>, <a href=&#39;?page=Annotation&feature=fig|66666…	yes
A and B	RNA Metabolism	RNA processing and modification	mnm5U34 biosynthesis bacteria	tRNA (5-methylaminomethyl-2-thiouridylate)-methyltransferase (EC 2.1.1.61)	<a href=&#39;?page=Annotation&feature=fig|6666666.640606.peg.938&#39; target=_blank>fig|6666666.640606.peg.938</a>	yes	<a href=&#39;?page=Annotation&feature=fig|6666666.640605.peg.2071&#39; target=_blank>fig|6666666.640605.peg.2071</a>	yes
A and B	RNA Metabolism	RNA processing and modification	tRNA processing	Ribonuclease P protein component (EC 3.1.26.5)	<a href=&#39;?page=Annotation&feature=fig|6666666.640606.peg.3400&#39; target=_blank>fig|6666666.640606.peg.3400</a>	yes	<a href=&#39;?page=Annotation&feature=fig|6666666.640605.peg.1913&#39; target=_blank>fig|6666666.640605.peg.1913</a>	yes
A and B	RNA Metabolism	RNA processing and modification	tRNA processing	Ribonuclease Z (EC 3.1.26.11)	<a href=&#39;?page=Annotation&feature=fig|6666666.640606.peg.625&#39; target=_blank>fig|6666666.640606.peg.625</a>	yes	<a href=&#39;?page=Annotation&feature=fig|6666666.640605.peg.2619&#39; target=_blank>fig|6666666.640605.peg.2619</a>	yes
A and B	RNA Metabolism	RNA processing and modification	tRNA processing	tRNA dimethylallyltransferase (EC 2.5.1.75)	<a href=&#39;?page=Annotation&feature=fig|6666666.640606.peg.498&#39; target=_blank>fig|6666666.640606.peg.498</a>	yes	<a href=&#39;?page=Annotation&feature=fig|6666666.640605.peg.115&#39; target=_blank>fig|6666666.640605.peg.115</a>	yes
A and B	RNA Metabolism	RNA processing and modification	tRNA processing	tRNA(Ile)-lysidine synthetase (EC 6.3.4.19)	<a href=&#39;?page=Annotation&feature=fig|6666666.640606.peg.1674&#39; target=_blank>fig|6666666.640606.peg.1674</a>	yes	<a href=&#39;?page=Annotation&feature=fig|6666666.640605.peg.3688&#39; target=_blank>fig|6666666.640605.peg.3688</a>	yes
A	RNA Metabolism	RNA processing and modification	RNA pseudouridine syntheses	tRNA pseudouridine synthase A (EC 4.2.1.70)	<a href=&#39;?page=Annotation&feature=fig|6666666.640606.peg.2919&#39; target=_blank>fig|6666666.640606.peg.2919</a>	yes	<input type=&#39;button&#39; class=&#39;button&#39; value=&#39;find&#39; onclick=&#39;window.open("?page=SearchGene&fr=tRNA pseudouridine synthase A (EC 4.2.1.70)&organism=6666666.640605&subsystem=RNA_pseudouridine_syntheses&template_gene=fig|6666666.640606.peg.2919");&#39;>	no
A and B	RNA Metabolism	Transcription	RNA polymerase bacterial	DNA-directed RNA polymerase alpha subunit (EC 2.7.7.6)	<a href=&#39;?page=Annotation&feature=fig|6666666.640606.peg.1655&#39; target=_blank>fig|6666666.640606.peg.1655</a>	yes	<a href=&#39;?page=Annotation&feature=fig|6666666.640605.peg.3669&#39; target=_blank>fig|6666666.640605.peg.3669</a>	yes
A and B	RNA Metabolism	Transcription	RNA polymerase bacterial	DNA-directed RNA polymerase beta subunit (EC 2.7.7.6)	<a href=&#39;?page=Annotation&feature=fig|6666666.640606.peg.1621&#39; target=_blank>fig|6666666.640606.peg.1621</a>	yes	<a href=&#39;?page=Annotation&feature=fig|6666666.640605.peg.3635&#39; target=_blank>fig|6666666.640605.peg.3635</a>	yes
A and B	RNA Metabolism	Transcription	RNA polymerase bacterial	DNA-directed RNA polymerase beta&#39; subunit (EC 2.7.7.6)	<a href=&#39;?page=Annotation&feature=fig|6666666.640606.peg.1622&#39; target=_blank>fig|6666666.640606.peg.1622</a>	yes	<a href=&#39;?page=Annotation&feature=fig|6666666.640605.peg.3636&#39; target=_blank>fig|6666666.640605.peg.3636</a>	yes
A and B	RNA Metabolism	Transcription	RNA polymerase bacterial	DNA-directed RNA polymerase omega subunit (EC 2.7.7.6)	<a href=&#39;?page=Annotation&feature=fig|6666666.640606.peg.1678&#39; target=_blank>fig|6666666.640606.peg.1678</a>	yes	<a href=&#39;?page=Annotation&feature=fig|6666666.640605.peg.3692&#39; target=_blank>fig|6666666.640605.peg.3692</a>	yes
A and B	RNA Metabolism	Transcription	Rrf2 family transcriptional regulators	Predicted transcriptional regulator of sulfate transport, Rrf2 family	<a href=&#39;?page=Annotation&feature=fig|6666666.640606.peg.1074&#39; target=_blank>fig|6666666.640606.peg.1074</a>	yes	<a href=&#39;?page=Annotation&feature=fig|6666666.640605.peg.2162&#39; target=_blank>fig|6666666.640605.peg.2162</a>	yes
A and B	RNA Metabolism	Transcription	Rrf2 family transcriptional regulators	Rrf2 family transcriptional regulator	<a href=&#39;?page=Annotation&feature=fig|6666666.640606.peg.281&#39; target=_blank>fig|6666666.640606.peg.281</a>, <a href=&#39;?page=Annotation&feature=fig|6666666.640606.peg.289&#39; target=_blank>fig|6666666.640606.peg.289</a>	yes	<a href=&#39;?page=Annotation&feature=fig|6666666.640605.peg.1518&#39; target=_blank>fig|6666666.640605.peg.1518</a>, <a href=&#39;?page=Annotation&feature=fig|6666666.640605.peg.1542&#39; target=_blank>fig|6666666.640605.peg.1542</a>	yes
A and B	RNA Metabolism	Transcription	Transcription factors bacterial	Transcription accessory protein (S1 RNA-binding domain)	<a href=&#39;?page=Annotation&feature=fig|6666666.640606.peg.3319&#39; target=_blank>fig|6666666.640606.peg.3319</a>	yes	<a href=&#39;?page=Annotation&feature=fig|6666666.640605.peg.2497&#39; target=_blank>fig|6666666.640605.peg.2497</a>	yes
A and B	RNA Metabolism	Transcription	Transcription factors bacterial	Transcription antitermination protein NusG	<a href=&#39;?page=Annotation&feature=fig|6666666.640606.peg.1616&#39; target=_blank>fig|6666666.640606.peg.1616</a>	yes	<a href=&#39;?page=Annotation&feature=fig|6666666.640605.peg.3630&#39; target=_blank>fig|6666666.640605.peg.3630</a>	yes
A and B	RNA Metabolism	Transcription	Transcription factors bacterial	Transcription elongation factor GreA	<a href=&#39;?page=Annotation&feature=fig|6666666.640606.peg.3255&#39; target=_blank>fig|6666666.640606.peg.3255</a>	yes	<a href=&#39;?page=Annotation&feature=fig|6666666.640605.peg.17&#39; target=_blank>fig|6666666.640605.peg.17</a>	yes
A and B	RNA Metabolism	Transcription	Transcription factors bacterial	Transcription termination factor Rho	<a href=&#39;?page=Annotation&feature=fig|6666666.640606.peg.1323&#39; target=_blank>fig|6666666.640606.peg.1323</a>	yes	<a href=&#39;?page=Annotation&feature=fig|6666666.640605.peg.3353&#39; target=_blank>fig|6666666.640605.peg.3353</a>	yes
A and B	RNA Metabolism	Transcription	Transcription factors bacterial	Transcription termination protein NusA	<a href=&#39;?page=Annotation&feature=fig|6666666.640606.peg.1334&#39; target=_blank>fig|6666666.640606.peg.1334</a>	yes	<a href=&#39;?page=Annotation&feature=fig|6666666.640605.peg.3365&#39; target=_blank>fig|6666666.640605.peg.3365</a>	yes
A and B	RNA Metabolism	Transcription	Transcription factors bacterial	Transcription termination protein NusB	<a href=&#39;?page=Annotation&feature=fig|6666666.640606.peg.1371&#39; target=_blank>fig|6666666.640606.peg.1371</a>	yes	<a href=&#39;?page=Annotation&feature=fig|6666666.640605.peg.3403&#39; target=_blank>fig|6666666.640605.peg.3403</a>	yes
A and B	RNA Metabolism	Transcription	Transcription factors bacterial	Transcription-repair coupling factor	<a href=&#39;?page=Annotation&feature=fig|6666666.640606.peg.1286&#39; target=_blank>fig|6666666.640606.peg.1286</a>	yes	<a href=&#39;?page=Annotation&feature=fig|6666666.640605.peg.3276&#39; target=_blank>fig|6666666.640605.peg.3276</a>	yes
A and B	RNA Metabolism	Transcription	Transcription factors bacterial	Transcriptional activator RfaH	<a href=&#39;?page=Annotation&feature=fig|6666666.640606.peg.3211&#39; target=_blank>fig|6666666.640606.peg.3211</a>	yes	<a href=&#39;?page=Annotation&feature=fig|6666666.640605.peg.459&#39; target=_blank>fig|6666666.640605.peg.459</a>	yes
A and B	RNA Metabolism	Transcription	Transcription initiation, bacterial sigma factors	RNA polymerase sigma factor RpoD	<a href=&#39;?page=Annotation&feature=fig|6666666.640606.peg.827&#39; target=_blank>fig|6666666.640606.peg.827</a>	yes	<a href=&#39;?page=Annotation&feature=fig|6666666.640605.peg.1857&#39; target=_blank>fig|6666666.640605.peg.1857</a>	yes
A and B	RNA Metabolism	Transcription	Transcription initiation, bacterial sigma factors	RNA polymerase sigma factor SigW	<a href=&#39;?page=Annotation&feature=fig|6666666.640606.peg.2947&#39; target=_blank>fig|6666666.640606.peg.2947</a>	yes	<a href=&#39;?page=Annotation&feature=fig|6666666.640605.peg.1948&#39; target=_blank>fig|6666666.640605.peg.1948</a>	yes
A and B	RNA Metabolism	Transcription	Transcription initiation, bacterial sigma factors	RNA polymerase sigma-54 factor RpoN	<a href=&#39;?page=Annotation&feature=fig|6666666.640606.peg.126&#39; target=_blank>fig|6666666.640606.peg.126</a>	yes	<a href=&#39;?page=Annotation&feature=fig|6666666.640605.peg.1028&#39; target=_blank>fig|6666666.640605.peg.1028</a>	yes
[truncated: 92 more rows]

## Sheet: Feuil1
orgn A	Algoriphagus ornithinivorans
orgn B	Algoriphagus mannitolivorans
