# Supplementary material for: Shedding light on the bacterial resistance to toxic UV filters: a comparative genomic study
Source: PeerJ. 2021 Nov 1;9:e12278. doi: 10.7717/peerj.12278 (PMC8567853; doi:10.7717/peerj.12278)
Supplement: Supplemental Information 2 [file peerj-09-12278-s002.xlsx]

## Sheet: Feuil2
Supplementary material
Title	Shedding light on the bacterial resistance to toxic UV filters: a comparative genomic study
Authors	Clément Lozano; Philippe Lebaron; Sabine Matallana-Surget

## Sheet: b megaterrium A VS H dabanensis
Presence	Category	Subcategory	Subsystem	Role	Organism A	SS active A	Organism B	SS active B
A and B	Amino Acids and Derivatives	Alanine, serine, and glycine	Alanine biosynthesis	Alanine racemase (EC 5.1.1.1)	<a href=&#39;?page=Annotation&feature=fig|6666666.640627.peg.402&#39; target=_blank>fig|6666666.640627.peg.402</a>, <a href=&#39;?page=Annotation&feature=fig|6666666.640627.peg.970&#39; target=_blank>fig|6666666.640627.peg.970</a>, <a href=&#39;?page=Annotation&feature=fig|6666666.640627.peg.3367&#39; target=_blank>fig|6666666.640627.peg.3367</a>	yes	<a href=&#39;?page=Annotation&feature=fig|6666666.640629.peg.2834&#39; target=_blank>fig|6666666.640629.peg.2834</a>, <a href=&#39;?page=Annotation&feature=fig|6666666.640629.peg.3692&#39; target=_blank>fig|6666666.640629.peg.3692</a>	yes
A and B	Amino Acids and Derivatives	Alanine, serine, and glycine	Alanine biosynthesis	Branched-chain amino acid aminotransferase (EC 2.6.1.42)	<a href=&#39;?page=Annotation&feature=fig|6666666.640627.peg.3759&#39; target=_blank>fig|6666666.640627.peg.3759</a>	yes	<a href=&#39;?page=Annotation&feature=fig|6666666.640629.peg.1533&#39; target=_blank>fig|6666666.640629.peg.1533</a>, <a href=&#39;?page=Annotation&feature=fig|6666666.640629.peg.2775&#39; target=_blank>fig|6666666.640629.peg.2775</a>	yes
A and B	Amino Acids and Derivatives	Alanine, serine, and glycine	Alanine biosynthesis	Cysteine desulfurase (EC 2.8.1.7)	<a href=&#39;?page=Annotation&feature=fig|6666666.640627.peg.64&#39; target=_blank>fig|6666666.640627.peg.64</a>, <a href=&#39;?page=Annotation&feature=fig|6666666.640627.peg.2014&#39; target=_blank>fig|6666666.640627.peg.2014</a>, <a href=&#39;?page=Annotation&feature=fig|6666666.640627.peg.3516&#39; target=_blank>fig|6666666.640627.peg.3516</a>	yes	<a href=&#39;?page=Annotation&feature=fig|6666666.640629.peg.220&#39; target=_blank>fig|6666666.640629.peg.220</a>, <a href=&#39;?page=Annotation&feature=fig|6666666.640629.peg.3992&#39; target=_blank>fig|6666666.640629.peg.3992</a>	yes
A and B	Amino Acids and Derivatives	Alanine, serine, and glycine	Alanine biosynthesis	Iron-sulfur cluster regulator IscR	<a href=&#39;?page=Annotation&feature=fig|6666666.640627.peg.2015&#39; target=_blank>fig|6666666.640627.peg.2015</a>	yes	<a href=&#39;?page=Annotation&feature=fig|6666666.640629.peg.219&#39; target=_blank>fig|6666666.640629.peg.219</a>	yes
A and B	Amino Acids and Derivatives	Alanine, serine, and glycine	Glycine Biosynthesis	2-amino-3-ketobutyrate coenzyme A ligase (EC 2.3.1.29)	<a href=&#39;?page=Annotation&feature=fig|6666666.640627.peg.3663&#39; target=_blank>fig|6666666.640627.peg.3663</a>	yes	<a href=&#39;?page=Annotation&feature=fig|6666666.640629.peg.3501&#39; target=_blank>fig|6666666.640629.peg.3501</a>	yes
A and B	Amino Acids and Derivatives	Alanine, serine, and glycine	Glycine Biosynthesis	L-threonine 3-dehydrogenase (EC 1.1.1.103)	<a href=&#39;?page=Annotation&feature=fig|6666666.640627.peg.3664&#39; target=_blank>fig|6666666.640627.peg.3664</a>	yes	<a href=&#39;?page=Annotation&feature=fig|6666666.640629.peg.3500&#39; target=_blank>fig|6666666.640629.peg.3500</a>	yes
A and B	Amino Acids and Derivatives	Alanine, serine, and glycine	Glycine Biosynthesis	Serine hydroxymethyltransferase (EC 2.1.2.1)	<a href=&#39;?page=Annotation&feature=fig|6666666.640627.peg.2628&#39; target=_blank>fig|6666666.640627.peg.2628</a>	yes	<a href=&#39;?page=Annotation&feature=fig|6666666.640629.peg.3021&#39; target=_blank>fig|6666666.640629.peg.3021</a>	yes
A and B	Amino Acids and Derivatives	Alanine, serine, and glycine	Glycine and Serine Utilization	2-amino-3-ketobutyrate coenzyme A ligase (EC 2.3.1.29)	<a href=&#39;?page=Annotation&feature=fig|6666666.640627.peg.3663&#39; target=_blank>fig|6666666.640627.peg.3663</a>	yes	<a href=&#39;?page=Annotation&feature=fig|6666666.640629.peg.3501&#39; target=_blank>fig|6666666.640629.peg.3501</a>	yes
A and B	Amino Acids and Derivatives	Alanine, serine, and glycine	Glycine and Serine Utilization	Aminomethyltransferase (glycine cleavage system T protein) (EC 2.1.2.10)	<a href=&#39;?page=Annotation&feature=fig|6666666.640627.peg.1885&#39; target=_blank>fig|6666666.640627.peg.1885</a>	yes	<a href=&#39;?page=Annotation&feature=fig|6666666.640629.peg.347&#39; target=_blank>fig|6666666.640629.peg.347</a>	yes
A and B	Amino Acids and Derivatives	Alanine, serine, and glycine	Glycine and Serine Utilization	Cystathionine beta-synthase (EC 4.2.1.22)	<a href=&#39;?page=Annotation&feature=fig|6666666.640627.peg.137&#39; target=_blank>fig|6666666.640627.peg.137</a>	yes	<a href=&#39;?page=Annotation&feature=fig|6666666.640629.peg.3340&#39; target=_blank>fig|6666666.640629.peg.3340</a>	yes
A and B	Amino Acids and Derivatives	Alanine, serine, and glycine	Glycine and Serine Utilization	Cystathionine gamma-lyase (EC 4.4.1.1)	<a href=&#39;?page=Annotation&feature=fig|6666666.640627.peg.138&#39; target=_blank>fig|6666666.640627.peg.138</a>	yes	<a href=&#39;?page=Annotation&feature=fig|6666666.640629.peg.3341&#39; target=_blank>fig|6666666.640629.peg.3341</a>	yes
A and B	Amino Acids and Derivatives	Alanine, serine, and glycine	Glycine and Serine Utilization	D-3-phosphoglycerate dehydrogenase (EC 1.1.1.95)	<a href=&#39;?page=Annotation&feature=fig|6666666.640627.peg.55&#39; target=_blank>fig|6666666.640627.peg.55</a>, <a href=&#39;?page=Annotation&feature=fig|6666666.640627.peg.1162&#39; target=_blank>fig|6666666.640627.peg.1162</a>, <a href=&#39;?page=Annotation&feature=fig|6666666.640627.peg.1163&#39; target=_blank>fig|6666666.640627.peg.1163</a>, <a href=&#39;?page=Annotation&feature=fig|6666666…	yes	<a href=&#39;?page=Annotation&feature=fig|6666666.640629.peg.646&#39; target=_blank>fig|6666666.640629.peg.646</a>, <a href=&#39;?page=Annotation&feature=fig|6666666.640629.peg.1179&#39; target=_blank>fig|6666666.640629.peg.1179</a>, <a href=&#39;?page=Annotation&feature=fig|6666666.640629.peg.2884&#39; target=_blank>fig|6666666.640629.peg.2884</a>, <a href=&#39;?page=Annotation&feature=fig|66666…	yes
A and B	Amino Acids and Derivatives	Alanine, serine, and glycine	Glycine and Serine Utilization	Glycerate kinase (EC 2.7.1.31)	<a href=&#39;?page=Annotation&feature=fig|6666666.640627.peg.20&#39; target=_blank>fig|6666666.640627.peg.20</a>	yes	<a href=&#39;?page=Annotation&feature=fig|6666666.640629.peg.995&#39; target=_blank>fig|6666666.640629.peg.995</a>, <a href=&#39;?page=Annotation&feature=fig|6666666.640629.peg.4094&#39; target=_blank>fig|6666666.640629.peg.4094</a>	yes
A and B	Amino Acids and Derivatives	Alanine, serine, and glycine	Glycine and Serine Utilization	Glycine cleavage system H protein	<a href=&#39;?page=Annotation&feature=fig|6666666.640627.peg.2418&#39; target=_blank>fig|6666666.640627.peg.2418</a>	yes	<a href=&#39;?page=Annotation&feature=fig|6666666.640629.peg.759&#39; target=_blank>fig|6666666.640629.peg.759</a>	yes
A and B	Amino Acids and Derivatives	Alanine, serine, and glycine	Glycine and Serine Utilization	Glycine dehydrogenase [decarboxylating] (glycine cleavage system P1 protein) (EC 1.4.4.2)	<a href=&#39;?page=Annotation&feature=fig|6666666.640627.peg.1884&#39; target=_blank>fig|6666666.640627.peg.1884</a>	yes	<a href=&#39;?page=Annotation&feature=fig|6666666.640629.peg.348&#39; target=_blank>fig|6666666.640629.peg.348</a>	yes
A and B	Amino Acids and Derivatives	Alanine, serine, and glycine	Glycine and Serine Utilization	Glycine dehydrogenase [decarboxylating] (glycine cleavage system P2 protein) (EC 1.4.4.2)	<a href=&#39;?page=Annotation&feature=fig|6666666.640627.peg.1883&#39; target=_blank>fig|6666666.640627.peg.1883</a>	yes	<a href=&#39;?page=Annotation&feature=fig|6666666.640629.peg.349&#39; target=_blank>fig|6666666.640629.peg.349</a>	yes
A and B	Amino Acids and Derivatives	Alanine, serine, and glycine	Glycine and Serine Utilization	L-serine dehydratase, (PLP)-dependent (EC 4.3.1.17)	<a href=&#39;?page=Annotation&feature=fig|6666666.640627.peg.388&#39; target=_blank>fig|6666666.640627.peg.388</a>, <a href=&#39;?page=Annotation&feature=fig|6666666.640627.peg.666&#39; target=_blank>fig|6666666.640627.peg.666</a>	yes	<a href=&#39;?page=Annotation&feature=fig|6666666.640629.peg.1541&#39; target=_blank>fig|6666666.640629.peg.1541</a>, <a href=&#39;?page=Annotation&feature=fig|6666666.640629.peg.4310&#39; target=_blank>fig|6666666.640629.peg.4310</a>	yes
A and B	Amino Acids and Derivatives	Alanine, serine, and glycine	Glycine and Serine Utilization	L-serine dehydratase, alpha subunit (EC 4.3.1.17)	<a href=&#39;?page=Annotation&feature=fig|6666666.640627.peg.1573&#39; target=_blank>fig|6666666.640627.peg.1573</a>	yes	<a href=&#39;?page=Annotation&feature=fig|6666666.640629.peg.2389&#39; target=_blank>fig|6666666.640629.peg.2389</a>	yes
A and B	Amino Acids and Derivatives	Alanine, serine, and glycine	Glycine and Serine Utilization	L-serine dehydratase, beta subunit (EC 4.3.1.17)	<a href=&#39;?page=Annotation&feature=fig|6666666.640627.peg.1572&#39; target=_blank>fig|6666666.640627.peg.1572</a>	yes	<a href=&#39;?page=Annotation&feature=fig|6666666.640629.peg.2388&#39; target=_blank>fig|6666666.640629.peg.2388</a>	yes
A and B	Amino Acids and Derivatives	Alanine, serine, and glycine	Glycine and Serine Utilization	Serine hydroxymethyltransferase (EC 2.1.2.1)	<a href=&#39;?page=Annotation&feature=fig|6666666.640627.peg.2628&#39; target=_blank>fig|6666666.640627.peg.2628</a>	yes	<a href=&#39;?page=Annotation&feature=fig|6666666.640629.peg.3021&#39; target=_blank>fig|6666666.640629.peg.3021</a>	yes
A and B	Amino Acids and Derivatives	Alanine, serine, and glycine	Glycine and Serine Utilization	Seryl-tRNA synthetase (EC 6.1.1.11)	<a href=&#39;?page=Annotation&feature=fig|6666666.640627.peg.719&#39; target=_blank>fig|6666666.640627.peg.719</a>	yes	<a href=&#39;?page=Annotation&feature=fig|6666666.640629.peg.2939&#39; target=_blank>fig|6666666.640629.peg.2939</a>	yes
A and B	Amino Acids and Derivatives	Alanine, serine, and glycine	Glycine and Serine Utilization	Threonine dehydratase, catabolic (EC 4.3.1.19)	<a href=&#39;?page=Annotation&feature=fig|6666666.640627.peg.388&#39; target=_blank>fig|6666666.640627.peg.388</a>, <a href=&#39;?page=Annotation&feature=fig|6666666.640627.peg.666&#39; target=_blank>fig|6666666.640627.peg.666</a>	yes	<a href=&#39;?page=Annotation&feature=fig|6666666.640629.peg.1541&#39; target=_blank>fig|6666666.640629.peg.1541</a>, <a href=&#39;?page=Annotation&feature=fig|6666666.640629.peg.4310&#39; target=_blank>fig|6666666.640629.peg.4310</a>	yes
A and B	Amino Acids and Derivatives	Alanine, serine, and glycine	Glycine cleavage system	Aminomethyltransferase (glycine cleavage system T protein) (EC 2.1.2.10)	<a href=&#39;?page=Annotation&feature=fig|6666666.640627.peg.1885&#39; target=_blank>fig|6666666.640627.peg.1885</a>	yes	<a href=&#39;?page=Annotation&feature=fig|6666666.640629.peg.347&#39; target=_blank>fig|6666666.640629.peg.347</a>	yes
A and B	Amino Acids and Derivatives	Alanine, serine, and glycine	Glycine cleavage system	Glycine cleavage system H protein	<a href=&#39;?page=Annotation&feature=fig|6666666.640627.peg.2418&#39; target=_blank>fig|6666666.640627.peg.2418</a>	yes	<a href=&#39;?page=Annotation&feature=fig|6666666.640629.peg.759&#39; target=_blank>fig|6666666.640629.peg.759</a>	yes
A and B	Amino Acids and Derivatives	Alanine, serine, and glycine	Glycine cleavage system	Glycine dehydrogenase [decarboxylating] (glycine cleavage system P1 protein) (EC 1.4.4.2)	<a href=&#39;?page=Annotation&feature=fig|6666666.640627.peg.1884&#39; target=_blank>fig|6666666.640627.peg.1884</a>	yes	<a href=&#39;?page=Annotation&feature=fig|6666666.640629.peg.348&#39; target=_blank>fig|6666666.640629.peg.348</a>	yes
A and B	Amino Acids and Derivatives	Alanine, serine, and glycine	Glycine cleavage system	Glycine dehydrogenase [decarboxylating] (glycine cleavage system P2 protein) (EC 1.4.4.2)	<a href=&#39;?page=Annotation&feature=fig|6666666.640627.peg.1883&#39; target=_blank>fig|6666666.640627.peg.1883</a>	yes	<a href=&#39;?page=Annotation&feature=fig|6666666.640629.peg.349&#39; target=_blank>fig|6666666.640629.peg.349</a>	yes
A and B	Amino Acids and Derivatives	Alanine, serine, and glycine	Glycine cleavage system	Sodium/glycine symporter GlyP	<a href=&#39;?page=Annotation&feature=fig|6666666.640627.peg.3644&#39; target=_blank>fig|6666666.640627.peg.3644</a>	yes	<a href=&#39;?page=Annotation&feature=fig|6666666.640629.peg.1042&#39; target=_blank>fig|6666666.640629.peg.1042</a>, <a href=&#39;?page=Annotation&feature=fig|6666666.640629.peg.3237&#39; target=_blank>fig|6666666.640629.peg.3237</a>, <a href=&#39;?page=Annotation&feature=fig|6666666.640629.peg.3959&#39; target=_blank>fig|6666666.640629.peg.3959</a>	yes
A and B	Amino Acids and Derivatives	Alanine, serine, and glycine	Serine Biosynthesis	D-3-phosphoglycerate dehydrogenase (EC 1.1.1.95)	<a href=&#39;?page=Annotation&feature=fig|6666666.640627.peg.55&#39; target=_blank>fig|6666666.640627.peg.55</a>, <a href=&#39;?page=Annotation&feature=fig|6666666.640627.peg.1162&#39; target=_blank>fig|6666666.640627.peg.1162</a>, <a href=&#39;?page=Annotation&feature=fig|6666666.640627.peg.1163&#39; target=_blank>fig|6666666.640627.peg.1163</a>, <a href=&#39;?page=Annotation&feature=fig|6666666…	yes	<a href=&#39;?page=Annotation&feature=fig|6666666.640629.peg.646&#39; target=_blank>fig|6666666.640629.peg.646</a>, <a href=&#39;?page=Annotation&feature=fig|6666666.640629.peg.1179&#39; target=_blank>fig|6666666.640629.peg.1179</a>, <a href=&#39;?page=Annotation&feature=fig|6666666.640629.peg.2884&#39; target=_blank>fig|6666666.640629.peg.2884</a>, <a href=&#39;?page=Annotation&feature=fig|66666…	yes
A and B	Amino Acids and Derivatives	Alanine, serine, and glycine	Serine Biosynthesis	Serine hydroxymethyltransferase (EC 2.1.2.1)	<a href=&#39;?page=Annotation&feature=fig|6666666.640627.peg.2628&#39; target=_blank>fig|6666666.640627.peg.2628</a>	yes	<a href=&#39;?page=Annotation&feature=fig|6666666.640629.peg.3021&#39; target=_blank>fig|6666666.640629.peg.3021</a>	yes
A and B	Amino Acids and Derivatives	Arginine; urea cycle, polyamines	Arginine Deiminase Pathway	Arginine deiminase (EC 3.5.3.6)	<a href=&#39;?page=Annotation&feature=fig|6666666.640627.peg.3354&#39; target=_blank>fig|6666666.640627.peg.3354</a>	yes	<a href=&#39;?page=Annotation&feature=fig|6666666.640629.peg.799&#39; target=_blank>fig|6666666.640629.peg.799</a>	yes
A and B	Amino Acids and Derivatives	Arginine; urea cycle, polyamines	Arginine Deiminase Pathway	Arginine pathway regulatory protein ArgR, repressor of arg regulon	<a href=&#39;?page=Annotation&feature=fig|6666666.640627.peg.1853&#39; target=_blank>fig|6666666.640627.peg.1853</a>	yes	<a href=&#39;?page=Annotation&feature=fig|6666666.640629.peg.380&#39; target=_blank>fig|6666666.640629.peg.380</a>	yes
A and B	Amino Acids and Derivatives	Arginine; urea cycle, polyamines	Arginine Deiminase Pathway	Ornithine carbamoyltransferase (EC 2.1.3.3)	<a href=&#39;?page=Annotation&feature=fig|6666666.640627.peg.3458&#39; target=_blank>fig|6666666.640627.peg.3458</a>	yes	<a href=&#39;?page=Annotation&feature=fig|6666666.640629.peg.3906&#39; target=_blank>fig|6666666.640629.peg.3906</a>	yes
A and B	Amino Acids and Derivatives	Arginine; urea cycle, polyamines	Arginine and Ornithine Degradation	Agmatinase (EC 3.5.3.11)	<a href=&#39;?page=Annotation&feature=fig|6666666.640627.peg.2666&#39; target=_blank>fig|6666666.640627.peg.2666</a>	yes	<a href=&#39;?page=Annotation&feature=fig|6666666.640629.peg.4382&#39; target=_blank>fig|6666666.640629.peg.4382</a>, <a href=&#39;?page=Annotation&feature=fig|6666666.640629.peg.4383&#39; target=_blank>fig|6666666.640629.peg.4383</a>	yes
A and B	Amino Acids and Derivatives	Arginine; urea cycle, polyamines	Arginine and Ornithine Degradation	Arginase (EC 3.5.3.1)	<a href=&#39;?page=Annotation&feature=fig|6666666.640627.peg.268&#39; target=_blank>fig|6666666.640627.peg.268</a>	yes	<a href=&#39;?page=Annotation&feature=fig|6666666.640629.peg.3914&#39; target=_blank>fig|6666666.640629.peg.3914</a>	yes
A and B	Amino Acids and Derivatives	Arginine; urea cycle, polyamines	Arginine and Ornithine Degradation	Arginine decarboxylase (EC 4.1.1.19)	<a href=&#39;?page=Annotation&feature=fig|6666666.640627.peg.1470&#39; target=_blank>fig|6666666.640627.peg.1470</a>	yes	<a href=&#39;?page=Annotation&feature=fig|6666666.640629.peg.2259&#39; target=_blank>fig|6666666.640629.peg.2259</a>	yes
A and B	Amino Acids and Derivatives	Arginine; urea cycle, polyamines	Arginine and Ornithine Degradation	Arginine deiminase (EC 3.5.3.6)	<a href=&#39;?page=Annotation&feature=fig|6666666.640627.peg.3354&#39; target=_blank>fig|6666666.640627.peg.3354</a>	yes	<a href=&#39;?page=Annotation&feature=fig|6666666.640629.peg.799&#39; target=_blank>fig|6666666.640629.peg.799</a>	yes
A and B	Amino Acids and Derivatives	Arginine; urea cycle, polyamines	Arginine and Ornithine Degradation	Arginine pathway regulatory protein ArgR, repressor of arg regulon	<a href=&#39;?page=Annotation&feature=fig|6666666.640627.peg.1853&#39; target=_blank>fig|6666666.640627.peg.1853</a>	yes	<a href=&#39;?page=Annotation&feature=fig|6666666.640629.peg.380&#39; target=_blank>fig|6666666.640629.peg.380</a>	yes
A and B	Amino Acids and Derivatives	Arginine; urea cycle, polyamines	Arginine and Ornithine Degradation	Arginine utilization protein RocB	<a href=&#39;?page=Annotation&feature=fig|6666666.640627.peg.1828&#39; target=_blank>fig|6666666.640627.peg.1828</a>	yes	<a href=&#39;?page=Annotation&feature=fig|6666666.640629.peg.416&#39; target=_blank>fig|6666666.640629.peg.416</a>	yes
A and B	Amino Acids and Derivatives	Arginine; urea cycle, polyamines	Arginine and Ornithine Degradation	Delta-1-pyrroline-5-carboxylate dehydrogenase (EC 1.2.1.88)	<a href=&#39;?page=Annotation&feature=fig|6666666.640627.peg.346&#39; target=_blank>fig|6666666.640627.peg.346</a>	yes	<a href=&#39;?page=Annotation&feature=fig|6666666.640629.peg.1794&#39; target=_blank>fig|6666666.640629.peg.1794</a>, <a href=&#39;?page=Annotation&feature=fig|6666666.640629.peg.2764&#39; target=_blank>fig|6666666.640629.peg.2764</a>	yes
A and B	Amino Acids and Derivatives	Arginine; urea cycle, polyamines	Arginine and Ornithine Degradation	Ornithine aminotransferase (EC 2.6.1.13)	<a href=&#39;?page=Annotation&feature=fig|6666666.640627.peg.1295&#39; target=_blank>fig|6666666.640627.peg.1295</a>	yes	<a href=&#39;?page=Annotation&feature=fig|6666666.640629.peg.1441&#39; target=_blank>fig|6666666.640629.peg.1441</a>	yes
A and B	Amino Acids and Derivatives	Arginine; urea cycle, polyamines	Arginine and Ornithine Degradation	Ornithine carbamoyltransferase (EC 2.1.3.3)	<a href=&#39;?page=Annotation&feature=fig|6666666.640627.peg.3458&#39; target=_blank>fig|6666666.640627.peg.3458</a>	yes	<a href=&#39;?page=Annotation&feature=fig|6666666.640629.peg.3906&#39; target=_blank>fig|6666666.640629.peg.3906</a>	yes
A and B	Amino Acids and Derivatives	Arginine; urea cycle, polyamines	Polyamine Metabolism	5&#39;-methylthioadenosine nucleosidase (EC 3.2.2.16)	<a href=&#39;?page=Annotation&feature=fig|6666666.640627.peg.1994&#39; target=_blank>fig|6666666.640627.peg.1994</a>	yes	<a href=&#39;?page=Annotation&feature=fig|6666666.640629.peg.236&#39; target=_blank>fig|6666666.640629.peg.236</a>, <a href=&#39;?page=Annotation&feature=fig|6666666.640629.peg.1241&#39; target=_blank>fig|6666666.640629.peg.1241</a>, <a href=&#39;?page=Annotation&feature=fig|6666666.640629.peg.1973&#39; target=_blank>fig|6666666.640629.peg.1973</a>	yes
A and B	Amino Acids and Derivatives	Arginine; urea cycle, polyamines	Polyamine Metabolism	Agmatinase (EC 3.5.3.11)	<a href=&#39;?page=Annotation&feature=fig|6666666.640627.peg.2666&#39; target=_blank>fig|6666666.640627.peg.2666</a>	yes	<a href=&#39;?page=Annotation&feature=fig|6666666.640629.peg.4382&#39; target=_blank>fig|6666666.640629.peg.4382</a>, <a href=&#39;?page=Annotation&feature=fig|6666666.640629.peg.4383&#39; target=_blank>fig|6666666.640629.peg.4383</a>	yes
A and B	Amino Acids and Derivatives	Arginine; urea cycle, polyamines	Polyamine Metabolism	Arginine decarboxylase (EC 4.1.1.19)	<a href=&#39;?page=Annotation&feature=fig|6666666.640627.peg.1470&#39; target=_blank>fig|6666666.640627.peg.1470</a>	yes	<a href=&#39;?page=Annotation&feature=fig|6666666.640629.peg.2259&#39; target=_blank>fig|6666666.640629.peg.2259</a>	yes
A and B	Amino Acids and Derivatives	Arginine; urea cycle, polyamines	Polyamine Metabolism	S-adenosylmethionine decarboxylase proenzyme (EC 4.1.1.50), prokaryotic class 1B	<a href=&#39;?page=Annotation&feature=fig|6666666.640627.peg.2202&#39; target=_blank>fig|6666666.640627.peg.2202</a>	yes	<a href=&#39;?page=Annotation&feature=fig|6666666.640629.peg.97&#39; target=_blank>fig|6666666.640629.peg.97</a>	yes
A and B	Amino Acids and Derivatives	Arginine; urea cycle, polyamines	Polyamine Metabolism	Spermidine synthase (EC 2.5.1.16)	<a href=&#39;?page=Annotation&feature=fig|6666666.640627.peg.2667&#39; target=_blank>fig|6666666.640627.peg.2667</a>, <a href=&#39;?page=Annotation&feature=fig|6666666.640627.peg.3064&#39; target=_blank>fig|6666666.640627.peg.3064</a>	yes	<a href=&#39;?page=Annotation&feature=fig|6666666.640629.peg.65&#39; target=_blank>fig|6666666.640629.peg.65</a>, <a href=&#39;?page=Annotation&feature=fig|6666666.640629.peg.4381&#39; target=_blank>fig|6666666.640629.peg.4381</a>	yes
A	Amino Acids and Derivatives	Arginine; urea cycle, polyamines	Arginine Deiminase Pathway	Arginine/ornithine antiporter ArcD	<a href=&#39;?page=Annotation&feature=fig|6666666.640627.peg.3241&#39; target=_blank>fig|6666666.640627.peg.3241</a>	yes	<input type=&#39;button&#39; class=&#39;button&#39; value=&#39;find&#39; onclick=&#39;window.open("?page=SearchGene&fr=Arginine/ornithine antiporter ArcD&organism=6666666.640629&subsystem=Arginine_Deiminase_Pathway&template_gene=fig|6666666.640627.peg.3241");&#39;>	no
A	Amino Acids and Derivatives	Arginine; urea cycle, polyamines	Polyamine Metabolism	Putrescine transport ATP-binding protein PotA (TC 3.A.1.11.1)	<a href=&#39;?page=Annotation&feature=fig|6666666.640627.peg.116&#39; target=_blank>fig|6666666.640627.peg.116</a>	yes	<input type=&#39;button&#39; class=&#39;button&#39; value=&#39;find&#39; onclick=&#39;window.open("?page=SearchGene&fr=Putrescine transport ATP-binding protein PotA (TC 3.A.1.11.1)&organism=6666666.640629&subsystem=Polyamine_Metabolism&template_gene=fig|6666666.640627.peg.116");&#39;>	no
B	Amino Acids and Derivatives	Arginine; urea cycle, polyamines	Arginine and Ornithine Degradation	NADP-specific glutamate dehydrogenase (EC 1.4.1.4)	<input type=&#39;button&#39; value=&#39;find&#39; onclick=&#39;window.open("?page=SearchGene&fr=NADP-specific glutamate dehydrogenase (EC 1.4.1.4)&organism=6666666.640627&subsystem=Arginine_and_Ornithine_Degradation&template_gene=fig|6666666.640629.peg.1566");&#39;>	no	<a href=&#39;?page=Annotation&feature=fig|6666666.640629.peg.1566&#39; target=_blank>fig|6666666.640629.peg.1566</a>, <a href=&#39;?page=Annotation&feature=fig|6666666.640629.peg.3181&#39; target=_blank>fig|6666666.640629.peg.3181</a>	yes
B	Amino Acids and Derivatives	Arginine; urea cycle, polyamines	Putrescine utilization pathways	Gamma-aminobutyrate:alpha-ketoglutarate aminotransferase (EC 2.6.1.19)	<input type=&#39;button&#39; value=&#39;find&#39; onclick=&#39;window.open("?page=SearchGene&fr=Gamma-aminobutyrate:alpha-ketoglutarate aminotransferase (EC 2.6.1.19)&organism=6666666.640627&subsystem=Putrescine_utilization_pathways&template_gene=fig|6666666.640629.peg.1221");&#39;>	no	<a href=&#39;?page=Annotation&feature=fig|6666666.640629.peg.1221&#39; target=_blank>fig|6666666.640629.peg.1221</a>, <a href=&#39;?page=Annotation&feature=fig|6666666.640629.peg.1255&#39; target=_blank>fig|6666666.640629.peg.1255</a>	yes
A and B	Amino Acids and Derivatives	Aromatic amino acids and derivatives	Aromatic amino acid degradation	Kynurenine formamidase, bacterial (EC 3.5.1.9)	<a href=&#39;?page=Annotation&feature=fig|6666666.640627.peg.4052&#39; target=_blank>fig|6666666.640627.peg.4052</a>	yes	<a href=&#39;?page=Annotation&feature=fig|6666666.640629.peg.4342&#39; target=_blank>fig|6666666.640629.peg.4342</a>	yes
A and B	Amino Acids and Derivatives	Aromatic amino acids and derivatives	Aromatic amino acid degradation	Predicted 2-keto-4-pentenoate hydratase/2-oxohepta-3-ene-1,7-dioic acid hydratase	<a href=&#39;?page=Annotation&feature=fig|6666666.640627.peg.2463&#39; target=_blank>fig|6666666.640627.peg.2463</a>	yes	<a href=&#39;?page=Annotation&feature=fig|6666666.640629.peg.2678&#39; target=_blank>fig|6666666.640629.peg.2678</a>	yes
A and B	Amino Acids and Derivatives	Aromatic amino acids and derivatives	Aromatic amino acid degradation	Tryptophan 2,3-dioxygenase (EC 1.13.11.11)	<a href=&#39;?page=Annotation&feature=fig|6666666.640627.peg.4051&#39; target=_blank>fig|6666666.640627.peg.4051</a>	yes	<a href=&#39;?page=Annotation&feature=fig|6666666.640629.peg.3844&#39; target=_blank>fig|6666666.640629.peg.3844</a>	yes
A and B	Amino Acids and Derivatives	Aromatic amino acids and derivatives	Chorismate: Intermediate for synthesis of Tryptophan, PAPA antibiotics, PABA, 3-hydroxyanthranilate and more.	Aminodeoxychorismate lyase (EC 4.1.3.38)	<a href=&#39;?page=Annotation&feature=fig|6666666.640627.peg.3168&#39; target=_blank>fig|6666666.640627.peg.3168</a>	yes	<a href=&#39;?page=Annotation&feature=fig|6666666.640629.peg.3892&#39; target=_blank>fig|6666666.640629.peg.3892</a>	yes
A and B	Amino Acids and Derivatives	Aromatic amino acids and derivatives	Chorismate: Intermediate for synthesis of Tryptophan, PAPA antibiotics, PABA, 3-hydroxyanthranilate and more.	Anthranilate phosphoribosyltransferase (EC 2.4.2.18)	<a href=&#39;?page=Annotation&feature=fig|6666666.640627.peg.3394&#39; target=_blank>fig|6666666.640627.peg.3394</a>	yes	<a href=&#39;?page=Annotation&feature=fig|6666666.640629.peg.3301&#39; target=_blank>fig|6666666.640629.peg.3301</a>	yes
A and B	Amino Acids and Derivatives	Aromatic amino acids and derivatives	Chorismate: Intermediate for synthesis of Tryptophan, PAPA antibiotics, PABA, 3-hydroxyanthranilate and more.	Anthranilate synthase, amidotransferase component (EC 4.1.3.27)	<a href=&#39;?page=Annotation&feature=fig|6666666.640627.peg.3395&#39; target=_blank>fig|6666666.640627.peg.3395</a>	yes	<a href=&#39;?page=Annotation&feature=fig|6666666.640629.peg.3893&#39; target=_blank>fig|6666666.640629.peg.3893</a>	yes
A and B	Amino Acids and Derivatives	Aromatic amino acids and derivatives	Chorismate: Intermediate for synthesis of Tryptophan, PAPA antibiotics, PABA, 3-hydroxyanthranilate and more.	Anthranilate synthase, aminase component (EC 4.1.3.27)	<a href=&#39;?page=Annotation&feature=fig|6666666.640627.peg.3396&#39; target=_blank>fig|6666666.640627.peg.3396</a>, <a href=&#39;?page=Annotation&feature=fig|6666666.640627.peg.3397&#39; target=_blank>fig|6666666.640627.peg.3397</a>	yes	<a href=&#39;?page=Annotation&feature=fig|6666666.640629.peg.3300&#39; target=_blank>fig|6666666.640629.peg.3300</a>	yes
A and B	Amino Acids and Derivatives	Aromatic amino acids and derivatives	Chorismate: Intermediate for synthesis of Tryptophan, PAPA antibiotics, PABA, 3-hydroxyanthranilate and more.	Indole-3-glycerol phosphate synthase (EC 4.1.1.48)	<a href=&#39;?page=Annotation&feature=fig|6666666.640627.peg.3393&#39; target=_blank>fig|6666666.640627.peg.3393</a>	yes	<a href=&#39;?page=Annotation&feature=fig|6666666.640629.peg.3302&#39; target=_blank>fig|6666666.640629.peg.3302</a>	yes
A and B	Amino Acids and Derivatives	Aromatic amino acids and derivatives	Chorismate: Intermediate for synthesis of Tryptophan, PAPA antibiotics, PABA, 3-hydroxyanthranilate and more.	Isochorismate synthase (EC 5.4.4.2)	<a href=&#39;?page=Annotation&feature=fig|6666666.640627.peg.2321&#39; target=_blank>fig|6666666.640627.peg.2321</a>, <a href=&#39;?page=Annotation&feature=fig|6666666.640627.peg.4313&#39; target=_blank>fig|6666666.640627.peg.4313</a>	yes	<a href=&#39;?page=Annotation&feature=fig|6666666.640629.peg.693&#39; target=_blank>fig|6666666.640629.peg.693</a>	yes
A and B	Amino Acids and Derivatives	Aromatic amino acids and derivatives	Chorismate: Intermediate for synthesis of Tryptophan, PAPA antibiotics, PABA, 3-hydroxyanthranilate and more.	Para-aminobenzoate synthase, amidotransferase component (EC 2.6.1.85)	<a href=&#39;?page=Annotation&feature=fig|6666666.640627.peg.3167&#39; target=_blank>fig|6666666.640627.peg.3167</a>	yes	<a href=&#39;?page=Annotation&feature=fig|6666666.640629.peg.3307&#39; target=_blank>fig|6666666.640629.peg.3307</a>	yes
A and B	Amino Acids and Derivatives	Aromatic amino acids and derivatives	Chorismate: Intermediate for synthesis of Tryptophan, PAPA antibiotics, PABA, 3-hydroxyanthranilate and more.	Para-aminobenzoate synthase, aminase component (EC 2.6.1.85)	<a href=&#39;?page=Annotation&feature=fig|6666666.640627.peg.3168&#39; target=_blank>fig|6666666.640627.peg.3168</a>	yes	<a href=&#39;?page=Annotation&feature=fig|6666666.640629.peg.3892&#39; target=_blank>fig|6666666.640629.peg.3892</a>	yes
A and B	Amino Acids and Derivatives	Aromatic amino acids and derivatives	Chorismate: Intermediate for synthesis of Tryptophan, PAPA antibiotics, PABA, 3-hydroxyanthranilate and more.	Phosphoribosylanthranilate isomerase (EC 5.3.1.24)	<a href=&#39;?page=Annotation&feature=fig|6666666.640627.peg.3392&#39; target=_blank>fig|6666666.640627.peg.3392</a>	yes	<a href=&#39;?page=Annotation&feature=fig|6666666.640629.peg.3303&#39; target=_blank>fig|6666666.640629.peg.3303</a>	yes
A and B	Amino Acids and Derivatives	Aromatic amino acids and derivatives	Chorismate: Intermediate for synthesis of Tryptophan, PAPA antibiotics, PABA, 3-hydroxyanthranilate and more.	Phosphoribosylformimino-5-aminoimidazole carboxamide ribotide isomerase (EC 5.3.1.16)	<a href=&#39;?page=Annotation&feature=fig|6666666.640627.peg.4325&#39; target=_blank>fig|6666666.640627.peg.4325</a>	yes	<a href=&#39;?page=Annotation&feature=fig|6666666.640629.peg.866&#39; target=_blank>fig|6666666.640629.peg.866</a>	yes
A and B	Amino Acids and Derivatives	Aromatic amino acids and derivatives	Chorismate: Intermediate for synthesis of Tryptophan, PAPA antibiotics, PABA, 3-hydroxyanthranilate and more.	Tryptophan synthase alpha chain (EC 4.2.1.20)	<a href=&#39;?page=Annotation&feature=fig|6666666.640627.peg.3390&#39; target=_blank>fig|6666666.640627.peg.3390</a>	yes	<a href=&#39;?page=Annotation&feature=fig|6666666.640629.peg.3306&#39; target=_blank>fig|6666666.640629.peg.3306</a>	yes
A and B	Amino Acids and Derivatives	Aromatic amino acids and derivatives	Chorismate: Intermediate for synthesis of Tryptophan, PAPA antibiotics, PABA, 3-hydroxyanthranilate and more.	Tryptophan synthase beta chain (EC 4.2.1.20)	<a href=&#39;?page=Annotation&feature=fig|6666666.640627.peg.3391&#39; target=_blank>fig|6666666.640627.peg.3391</a>	yes	<a href=&#39;?page=Annotation&feature=fig|6666666.640629.peg.3304&#39; target=_blank>fig|6666666.640629.peg.3304</a>, <a href=&#39;?page=Annotation&feature=fig|6666666.640629.peg.3305&#39; target=_blank>fig|6666666.640629.peg.3305</a>	yes
A and B	Amino Acids and Derivatives	Aromatic amino acids and derivatives	Common Pathway For Synthesis of Aromatic Compounds (DAHP synthase to chorismate)	2-keto-3-deoxy-D-arabino-heptulosonate-7-phosphate synthase I beta (EC 2.5.1.54)	<a href=&#39;?page=Annotation&feature=fig|6666666.640627.peg.2271&#39; target=_blank>fig|6666666.640627.peg.2271</a>, <a href=&#39;?page=Annotation&feature=fig|6666666.640627.peg.4307&#39; target=_blank>fig|6666666.640627.peg.4307</a>	yes	<a href=&#39;?page=Annotation&feature=fig|6666666.640629.peg.33&#39; target=_blank>fig|6666666.640629.peg.33</a>	yes
A and B	Amino Acids and Derivatives	Aromatic amino acids and derivatives	Common Pathway For Synthesis of Aromatic Compounds (DAHP synthase to chorismate)	3-dehydroquinate synthase (EC 4.2.3.4)	<a href=&#39;?page=Annotation&feature=fig|6666666.640627.peg.1745&#39; target=_blank>fig|6666666.640627.peg.1745</a>	yes	<a href=&#39;?page=Annotation&feature=fig|6666666.640629.peg.2502&#39; target=_blank>fig|6666666.640629.peg.2502</a>	yes
A and B	Amino Acids and Derivatives	Aromatic amino acids and derivatives	Common Pathway For Synthesis of Aromatic Compounds (DAHP synthase to chorismate)	Chorismate synthase (EC 4.2.3.5)	<a href=&#39;?page=Annotation&feature=fig|6666666.640627.peg.1746&#39; target=_blank>fig|6666666.640627.peg.1746</a>	yes	<a href=&#39;?page=Annotation&feature=fig|6666666.640629.peg.2503&#39; target=_blank>fig|6666666.640629.peg.2503</a>	yes
A and B	Amino Acids and Derivatives	Aromatic amino acids and derivatives	Common Pathway For Synthesis of Aromatic Compounds (DAHP synthase to chorismate)	Shikimate 5-dehydrogenase I alpha (EC 1.1.1.25)	<a href=&#39;?page=Annotation&feature=fig|6666666.640627.peg.1981&#39; target=_blank>fig|6666666.640627.peg.1981</a>	yes	<a href=&#39;?page=Annotation&feature=fig|6666666.640629.peg.248&#39; target=_blank>fig|6666666.640629.peg.248</a>	yes
A and B	Amino Acids and Derivatives	Aromatic amino acids and derivatives	Common Pathway For Synthesis of Aromatic Compounds (DAHP synthase to chorismate)	Shikimate kinase I (EC 2.7.1.71)	<a href=&#39;?page=Annotation&feature=fig|6666666.640627.peg.2472&#39; target=_blank>fig|6666666.640627.peg.2472</a>	yes	<a href=&#39;?page=Annotation&feature=fig|6666666.640629.peg.342&#39; target=_blank>fig|6666666.640629.peg.342</a>	yes
A and B	Amino Acids and Derivatives	Aromatic amino acids and derivatives	Phenylalanine and Tyrosine Branches from Chorismate	Biosynthetic Aromatic amino acid aminotransferase beta (EC 2.6.1.57)	<a href=&#39;?page=Annotation&feature=fig|6666666.640627.peg.1743&#39; target=_blank>fig|6666666.640627.peg.1743</a>	yes	<a href=&#39;?page=Annotation&feature=fig|6666666.640629.peg.2500&#39; target=_blank>fig|6666666.640629.peg.2500</a>	yes
A and B	Amino Acids and Derivatives	Aromatic amino acids and derivatives	Phenylalanine and Tyrosine Branches from Chorismate	Chorismate mutase I (EC 5.4.99.5)	<a href=&#39;?page=Annotation&feature=fig|6666666.640627.peg.2271&#39; target=_blank>fig|6666666.640627.peg.2271</a>	yes	<a href=&#39;?page=Annotation&feature=fig|6666666.640629.peg.33&#39; target=_blank>fig|6666666.640629.peg.33</a>	yes
A and B	Amino Acids and Derivatives	Aromatic amino acids and derivatives	Phenylalanine and Tyrosine Branches from Chorismate	Chorismate mutase II (EC 5.4.99.5)	<a href=&#39;?page=Annotation&feature=fig|6666666.640627.peg.1744&#39; target=_blank>fig|6666666.640627.peg.1744</a>	yes	<a href=&#39;?page=Annotation&feature=fig|6666666.640629.peg.2501&#39; target=_blank>fig|6666666.640629.peg.2501</a>	yes
A and B	Amino Acids and Derivatives	Aromatic amino acids and derivatives	Phenylalanine and Tyrosine Branches from Chorismate	Prephenate dehydratase (EC 4.2.1.51)	<a href=&#39;?page=Annotation&feature=fig|6666666.640627.peg.2048&#39; target=_blank>fig|6666666.640627.peg.2048</a>	yes	<a href=&#39;?page=Annotation&feature=fig|6666666.640629.peg.187&#39; target=_blank>fig|6666666.640629.peg.187</a>	yes
A and B	Amino Acids and Derivatives	Aromatic amino acids and derivatives	Phenylalanine and Tyrosine Branches from Chorismate	Prephenate dehydrogenase (EC 1.3.1.12)	<a href=&#39;?page=Annotation&feature=fig|6666666.640627.peg.1742&#39; target=_blank>fig|6666666.640627.peg.1742</a>	yes	<a href=&#39;?page=Annotation&feature=fig|6666666.640629.peg.2499&#39; target=_blank>fig|6666666.640629.peg.2499</a>	yes
A and B	Amino Acids and Derivatives	Aromatic amino acids and derivatives	Tryptophan synthesis	Aminodeoxychorismate lyase (EC 4.1.3.38)	<a href=&#39;?page=Annotation&feature=fig|6666666.640627.peg.3168&#39; target=_blank>fig|6666666.640627.peg.3168</a>	yes	<a href=&#39;?page=Annotation&feature=fig|6666666.640629.peg.3892&#39; target=_blank>fig|6666666.640629.peg.3892</a>	yes
A and B	Amino Acids and Derivatives	Aromatic amino acids and derivatives	Tryptophan synthesis	Anthranilate phosphoribosyltransferase (EC 2.4.2.18)	<a href=&#39;?page=Annotation&feature=fig|6666666.640627.peg.3394&#39; target=_blank>fig|6666666.640627.peg.3394</a>	yes	<a href=&#39;?page=Annotation&feature=fig|6666666.640629.peg.3301&#39; target=_blank>fig|6666666.640629.peg.3301</a>	yes
A and B	Amino Acids and Derivatives	Aromatic amino acids and derivatives	Tryptophan synthesis	Anthranilate synthase, amidotransferase component (EC 4.1.3.27)	<a href=&#39;?page=Annotation&feature=fig|6666666.640627.peg.3395&#39; target=_blank>fig|6666666.640627.peg.3395</a>	yes	<a href=&#39;?page=Annotation&feature=fig|6666666.640629.peg.3893&#39; target=_blank>fig|6666666.640629.peg.3893</a>	yes
A and B	Amino Acids and Derivatives	Aromatic amino acids and derivatives	Tryptophan synthesis	Anthranilate synthase, aminase component (EC 4.1.3.27)	<a href=&#39;?page=Annotation&feature=fig|6666666.640627.peg.3396&#39; target=_blank>fig|6666666.640627.peg.3396</a>, <a href=&#39;?page=Annotation&feature=fig|6666666.640627.peg.3397&#39; target=_blank>fig|6666666.640627.peg.3397</a>	yes	<a href=&#39;?page=Annotation&feature=fig|6666666.640629.peg.3300&#39; target=_blank>fig|6666666.640629.peg.3300</a>	yes
A and B	Amino Acids and Derivatives	Aromatic amino acids and derivatives	Tryptophan synthesis	Indole-3-glycerol phosphate synthase (EC 4.1.1.48)	<a href=&#39;?page=Annotation&feature=fig|6666666.640627.peg.3393&#39; target=_blank>fig|6666666.640627.peg.3393</a>	yes	<a href=&#39;?page=Annotation&feature=fig|6666666.640629.peg.3302&#39; target=_blank>fig|6666666.640629.peg.3302</a>	yes
A and B	Amino Acids and Derivatives	Aromatic amino acids and derivatives	Tryptophan synthesis	Para-aminobenzoate synthase, amidotransferase component (EC 2.6.1.85)	<a href=&#39;?page=Annotation&feature=fig|6666666.640627.peg.3167&#39; target=_blank>fig|6666666.640627.peg.3167</a>	yes	<a href=&#39;?page=Annotation&feature=fig|6666666.640629.peg.3307&#39; target=_blank>fig|6666666.640629.peg.3307</a>	yes
A and B	Amino Acids and Derivatives	Aromatic amino acids and derivatives	Tryptophan synthesis	Para-aminobenzoate synthase, aminase component (EC 2.6.1.85)	<a href=&#39;?page=Annotation&feature=fig|6666666.640627.peg.3168&#39; target=_blank>fig|6666666.640627.peg.3168</a>	yes	<a href=&#39;?page=Annotation&feature=fig|6666666.640629.peg.3892&#39; target=_blank>fig|6666666.640629.peg.3892</a>	yes
A and B	Amino Acids and Derivatives	Aromatic amino acids and derivatives	Tryptophan synthesis	Phosphoribosylanthranilate isomerase (EC 5.3.1.24)	<a href=&#39;?page=Annotation&feature=fig|6666666.640627.peg.3392&#39; target=_blank>fig|6666666.640627.peg.3392</a>	yes	<a href=&#39;?page=Annotation&feature=fig|6666666.640629.peg.3303&#39; target=_blank>fig|6666666.640629.peg.3303</a>	yes
A and B	Amino Acids and Derivatives	Aromatic amino acids and derivatives	Tryptophan synthesis	Tryptophan synthase alpha chain (EC 4.2.1.20)	<a href=&#39;?page=Annotation&feature=fig|6666666.640627.peg.3390&#39; target=_blank>fig|6666666.640627.peg.3390</a>	yes	<a href=&#39;?page=Annotation&feature=fig|6666666.640629.peg.3306&#39; target=_blank>fig|6666666.640629.peg.3306</a>	yes
A and B	Amino Acids and Derivatives	Aromatic amino acids and derivatives	Tryptophan synthesis	Tryptophan synthase beta chain (EC 4.2.1.20)	<a href=&#39;?page=Annotation&feature=fig|6666666.640627.peg.3391&#39; target=_blank>fig|6666666.640627.peg.3391</a>	yes	<a href=&#39;?page=Annotation&feature=fig|6666666.640629.peg.3304&#39; target=_blank>fig|6666666.640629.peg.3304</a>, <a href=&#39;?page=Annotation&feature=fig|6666666.640629.peg.3305&#39; target=_blank>fig|6666666.640629.peg.3305</a>	yes
A	Amino Acids and Derivatives	Aromatic amino acids and derivatives	Aromatic amino acid degradation	2-hydroxyhepta-2,4-diene-1,7-dioate isomerase (EC 5.3.3.-)	<a href=&#39;?page=Annotation&feature=fig|6666666.640627.peg.2535&#39; target=_blank>fig|6666666.640627.peg.2535</a>	yes	<input type=&#39;button&#39; class=&#39;button&#39; value=&#39;find&#39; onclick=&#39;window.open("?page=SearchGene&fr=2-hydroxyhepta-2,4-diene-1,7-dioate isomerase (EC 5.3.3.-)&organism=6666666.640629&subsystem=Aromatic_amino_acid_degradation&template_gene=fig|6666666.640627.peg.2535");&#39;>	no
A	Amino Acids and Derivatives	Aromatic amino acids and derivatives	Aromatic amino acid degradation	5-carboxymethyl-2-hydroxymuconate delta-isomerase (EC 5.3.3.10)	<a href=&#39;?page=Annotation&feature=fig|6666666.640627.peg.2536&#39; target=_blank>fig|6666666.640627.peg.2536</a>	yes	<input type=&#39;button&#39; class=&#39;button&#39; value=&#39;find&#39; onclick=&#39;window.open("?page=SearchGene&fr=5-carboxymethyl-2-hydroxymuconate delta-isomerase (EC 5.3.3.10)&organism=6666666.640629&subsystem=Aromatic_amino_acid_degradation&template_gene=fig|6666666.640627.peg.2536");&#39;>	no
A	Amino Acids and Derivatives	Aromatic amino acids and derivatives	Aromatic amino acid degradation	5-carboxymethyl-2-hydroxymuconate semialdehyde dehydrogenase (EC 1.2.1.60)	<a href=&#39;?page=Annotation&feature=fig|6666666.640627.peg.2531&#39; target=_blank>fig|6666666.640627.peg.2531</a>	yes	<input type=&#39;button&#39; class=&#39;button&#39; value=&#39;find&#39; onclick=&#39;window.open("?page=SearchGene&fr=5-carboxymethyl-2-hydroxymuconate semialdehyde dehydrogenase (EC 1.2.1.60)&organism=6666666.640629&subsystem=Aromatic_amino_acid_degradation&template_gene=fig|6666666.640627.peg.2531");&#39;>	no
A	Amino Acids and Derivatives	Aromatic amino acids and derivatives	Aromatic amino acid degradation	5-carboxymethyl-2-oxo-hex-3- ene-1,7-dioate decarboxylase (EC 4.1.1.68)	<a href=&#39;?page=Annotation&feature=fig|6666666.640627.peg.2534&#39; target=_blank>fig|6666666.640627.peg.2534</a>	yes	<input type=&#39;button&#39; class=&#39;button&#39; value=&#39;find&#39; onclick=&#39;window.open("?page=SearchGene&fr=5-carboxymethyl-2-oxo-hex-3- ene-1,7-dioate decarboxylase (EC 4.1.1.68)&organism=6666666.640629&subsystem=Aromatic_amino_acid_degradation&template_gene=fig|6666666.640627.peg.2534");&#39;>	no
A	Amino Acids and Derivatives	Aromatic amino acids and derivatives	Chorismate: Intermediate for synthesis of Tryptophan, PAPA antibiotics, PABA, 3-hydroxyanthranilate and more.	Isochorismatase (EC 3.3.2.1)	<a href=&#39;?page=Annotation&feature=fig|6666666.640627.peg.617&#39; target=_blank>fig|6666666.640627.peg.617</a>	yes	<input type=&#39;button&#39; class=&#39;button&#39; value=&#39;find&#39; onclick=&#39;window.open("?page=SearchGene&fr=Isochorismatase (EC 3.3.2.1)&organism=6666666.640629&subsystem=Chorismate:_Intermediate_for_synthesis_of_Tryptophan,_PAPA_antibiotics,_PABA,_3-hydroxyanthranilate_and_more.&template_gene=fig|6666666.640627.peg.617");&#39;>	no
A	Amino Acids and Derivatives	Aromatic amino acids and derivatives	Chorismate: Intermediate for synthesis of Tryptophan, PAPA antibiotics, PABA, 3-hydroxyanthranilate and more.	Isochorismatase (EC 3.3.2.1) of siderophore biosynthesis	<a href=&#39;?page=Annotation&feature=fig|6666666.640627.peg.4311&#39; target=_blank>fig|6666666.640627.peg.4311</a>	yes	<input type=&#39;button&#39; class=&#39;button&#39; value=&#39;find&#39; onclick=&#39;window.open("?page=SearchGene&fr=Isochorismatase (EC 3.3.2.1) of siderophore biosynthesis&organism=6666666.640629&subsystem=Chorismate:_Intermediate_for_synthesis_of_Tryptophan,_PAPA_antibiotics,_PABA,_3-hydroxyanthranilate_and_more.&template_gene=fig|6666666.640627.peg.4311");&#39;>	no
A	Amino Acids and Derivatives	Aromatic amino acids and derivatives	Chorismate: Intermediate for synthesis of Tryptophan, PAPA antibiotics, PABA, 3-hydroxyanthranilate and more.	Isochorismate synthase (EC 5.4.4.2) of siderophore biosynthesis	<a href=&#39;?page=Annotation&feature=fig|6666666.640627.peg.4313&#39; target=_blank>fig|6666666.640627.peg.4313</a>	yes	<input type=&#39;button&#39; class=&#39;button&#39; value=&#39;find&#39; onclick=&#39;window.open("?page=SearchGene&fr=Isochorismate synthase (EC 5.4.4.2) of siderophore biosynthesis&organism=6666666.640629&subsystem=Chorismate:_Intermediate_for_synthesis_of_Tryptophan,_PAPA_antibiotics,_PABA,_3-hydroxyanthranilate_and_more.&template_gene=fig|6666666.640627.peg.4313");&#39;>	no
A	Amino Acids and Derivatives	Aromatic amino acids and derivatives	Common Pathway For Synthesis of Aromatic Compounds (DAHP synthase to chorismate)	3-dehydroquinate dehydratase I (EC 4.2.1.10)	<a href=&#39;?page=Annotation&feature=fig|6666666.640627.peg.2471&#39; target=_blank>fig|6666666.640627.peg.2471</a>	yes	<input type=&#39;button&#39; class=&#39;button&#39; value=&#39;find&#39; onclick=&#39;window.open("?page=SearchGene&fr=3-dehydroquinate dehydratase I (EC 4.2.1.10)&organism=6666666.640629&subsystem=Common_Pathway_For_Synthesis_of_Aromatic_Compounds_(DAHP_synthase_to_chorismate)&template_gene=fig|6666666.640627.peg.2471");&#39;>	no
B	Amino Acids and Derivatives	Aromatic amino acids and derivatives	Common Pathway For Synthesis of Aromatic Compounds (DAHP synthase to chorismate)	3-dehydroquinate dehydratase II (EC 4.2.1.10)	<input type=&#39;button&#39; value=&#39;find&#39; onclick=&#39;window.open("?page=SearchGene&fr=3-dehydroquinate dehydratase II (EC 4.2.1.10)&organism=6666666.640627&subsystem=Common_Pathway_For_Synthesis_of_Aromatic_Compounds_(DAHP_synthase_to_chorismate)&template_gene=fig|6666666.640629.peg.358");&#39;>	no	<a href=&#39;?page=Annotation&feature=fig|6666666.640629.peg.358&#39; target=_blank>fig|6666666.640629.peg.358</a>	yes
B	Amino Acids and Derivatives	Aromatic amino acids and derivatives	Phenylalanine and Tyrosine Branches from Chorismate	Biosynthetic Aromatic amino acid aminotransferase alpha (EC 2.6.1.57)	<input type=&#39;button&#39; value=&#39;find&#39; onclick=&#39;window.open("?page=SearchGene&fr=Biosynthetic Aromatic amino acid aminotransferase alpha (EC 2.6.1.57)&organism=6666666.640627&subsystem=Phenylalanine_and_Tyrosine_Branches_from_Chorismate&template_gene=fig|6666666.640629.peg.518");&#39;>	no	<a href=&#39;?page=Annotation&feature=fig|6666666.640629.peg.518&#39; target=_blank>fig|6666666.640629.peg.518</a>	yes
A and B	Amino Acids and Derivatives	Branched-chain amino acids	Branched-Chain Amino Acid Biosynthesis	2-isopropylmalate synthase (EC 2.3.3.13)	<a href=&#39;?page=Annotation&feature=fig|6666666.640627.peg.384&#39; target=_blank>fig|6666666.640627.peg.384</a>	yes	<a href=&#39;?page=Annotation&feature=fig|6666666.640629.peg.1537&#39; target=_blank>fig|6666666.640629.peg.1537</a>	yes
A and B	Amino Acids and Derivatives	Branched-chain amino acids	Branched-Chain Amino Acid Biosynthesis	3-isopropylmalate dehydratase large subunit (EC 4.2.1.33)	<a href=&#39;?page=Annotation&feature=fig|6666666.640627.peg.386&#39; target=_blank>fig|6666666.640627.peg.386</a>	yes	<a href=&#39;?page=Annotation&feature=fig|6666666.640629.peg.1539&#39; target=_blank>fig|6666666.640629.peg.1539</a>	yes
A and B	Amino Acids and Derivatives	Branched-chain amino acids	Branched-Chain Amino Acid Biosynthesis	3-isopropylmalate dehydratase small subunit (EC 4.2.1.33)	<a href=&#39;?page=Annotation&feature=fig|6666666.640627.peg.387&#39; target=_blank>fig|6666666.640627.peg.387</a>	yes	<a href=&#39;?page=Annotation&feature=fig|6666666.640629.peg.1540&#39; target=_blank>fig|6666666.640629.peg.1540</a>	yes
A and B	Amino Acids and Derivatives	Branched-chain amino acids	Branched-Chain Amino Acid Biosynthesis	3-isopropylmalate dehydrogenase (EC 1.1.1.85)	<a href=&#39;?page=Annotation&feature=fig|6666666.640627.peg.385&#39; target=_blank>fig|6666666.640627.peg.385</a>	yes	<a href=&#39;?page=Annotation&feature=fig|6666666.640629.peg.1538&#39; target=_blank>fig|6666666.640629.peg.1538</a>	yes
A and B	Amino Acids and Derivatives	Branched-chain amino acids	Branched-Chain Amino Acid Biosynthesis	Acetolactate synthase large subunit (EC 2.2.1.6)	<a href=&#39;?page=Annotation&feature=fig|6666666.640627.peg.381&#39; target=_blank>fig|6666666.640627.peg.381</a>	yes	<a href=&#39;?page=Annotation&feature=fig|6666666.640629.peg.1534&#39; target=_blank>fig|6666666.640629.peg.1534</a>	yes
A and B	Amino Acids and Derivatives	Branched-chain amino acids	Branched-Chain Amino Acid Biosynthesis	Acetolactate synthase small subunit (EC 2.2.1.6)	<a href=&#39;?page=Annotation&feature=fig|6666666.640627.peg.382&#39; target=_blank>fig|6666666.640627.peg.382</a>	yes	<a href=&#39;?page=Annotation&feature=fig|6666666.640629.peg.1535&#39; target=_blank>fig|6666666.640629.peg.1535</a>	yes
A and B	Amino Acids and Derivatives	Branched-chain amino acids	Branched-Chain Amino Acid Biosynthesis	Branched-chain amino acid aminotransferase (EC 2.6.1.42)	<a href=&#39;?page=Annotation&feature=fig|6666666.640627.peg.3759&#39; target=_blank>fig|6666666.640627.peg.3759</a>	yes	<a href=&#39;?page=Annotation&feature=fig|6666666.640629.peg.1533&#39; target=_blank>fig|6666666.640629.peg.1533</a>, <a href=&#39;?page=Annotation&feature=fig|6666666.640629.peg.2775&#39; target=_blank>fig|6666666.640629.peg.2775</a>	yes
A and B	Amino Acids and Derivatives	Branched-chain amino acids	Branched-Chain Amino Acid Biosynthesis	Dihydroxy-acid dehydratase (EC 4.2.1.9)	<a href=&#39;?page=Annotation&feature=fig|6666666.640627.peg.380&#39; target=_blank>fig|6666666.640627.peg.380</a>	yes	<a href=&#39;?page=Annotation&feature=fig|6666666.640629.peg.792&#39; target=_blank>fig|6666666.640629.peg.792</a>	yes
A and B	Amino Acids and Derivatives	Branched-chain amino acids	Branched-Chain Amino Acid Biosynthesis	Threonine dehydratase, catabolic (EC 4.3.1.19)	<a href=&#39;?page=Annotation&feature=fig|6666666.640627.peg.388&#39; target=_blank>fig|6666666.640627.peg.388</a>, <a href=&#39;?page=Annotation&feature=fig|6666666.640627.peg.666&#39; target=_blank>fig|6666666.640627.peg.666</a>	yes	<a href=&#39;?page=Annotation&feature=fig|6666666.640629.peg.1541&#39; target=_blank>fig|6666666.640629.peg.1541</a>, <a href=&#39;?page=Annotation&feature=fig|6666666.640629.peg.4310&#39; target=_blank>fig|6666666.640629.peg.4310</a>	yes
A and B	Amino Acids and Derivatives	Branched-chain amino acids	Isoleucine degradation	3-hydroxyacyl-CoA dehydrogenase (EC 1.1.1.35)	<a href=&#39;?page=Annotation&feature=fig|6666666.640627.peg.304&#39; target=_blank>fig|6666666.640627.peg.304</a>	yes	<a href=&#39;?page=Annotation&feature=fig|6666666.640629.peg.1069&#39; target=_blank>fig|6666666.640629.peg.1069</a>, <a href=&#39;?page=Annotation&feature=fig|6666666.640629.peg.1072&#39; target=_blank>fig|6666666.640629.peg.1072</a>, <a href=&#39;?page=Annotation&feature=fig|6666666.640629.peg.2687&#39; target=_blank>fig|6666666.640629.peg.2687</a>	yes
A and B	Amino Acids and Derivatives	Branched-chain amino acids	Isoleucine degradation	3-ketoacyl-CoA thiolase (EC 2.3.1.16)	<a href=&#39;?page=Annotation&feature=fig|6666666.640627.peg.305&#39; target=_blank>fig|6666666.640627.peg.305</a>, <a href=&#39;?page=Annotation&feature=fig|6666666.640627.peg.940&#39; target=_blank>fig|6666666.640627.peg.940</a>, <a href=&#39;?page=Annotation&feature=fig|6666666.640627.peg.2466&#39; target=_blank>fig|6666666.640627.peg.2466</a>	yes	<a href=&#39;?page=Annotation&feature=fig|6666666.640629.peg.1067&#39; target=_blank>fig|6666666.640629.peg.1067</a>, <a href=&#39;?page=Annotation&feature=fig|6666666.640629.peg.1090&#39; target=_blank>fig|6666666.640629.peg.1090</a>, <a href=&#39;?page=Annotation&feature=fig|6666666.640629.peg.1104&#39; target=_blank>fig|6666666.640629.peg.1104</a>, <a href=&#39;?page=Annotation&feature=fig|666…	yes
A and B	Amino Acids and Derivatives	Branched-chain amino acids	Isoleucine degradation	Branched-chain alpha-keto acid dehydrogenase, E1 component, alpha subunit (EC 1.2.4.4)	<a href=&#39;?page=Annotation&feature=fig|6666666.640627.peg.623&#39; target=_blank>fig|6666666.640627.peg.623</a>, <a href=&#39;?page=Annotation&feature=fig|6666666.640627.peg.1842&#39; target=_blank>fig|6666666.640627.peg.1842</a>	yes	<a href=&#39;?page=Annotation&feature=fig|6666666.640629.peg.394&#39; target=_blank>fig|6666666.640629.peg.394</a>	yes
A and B	Amino Acids and Derivatives	Branched-chain amino acids	Isoleucine degradation	Branched-chain alpha-keto acid dehydrogenase, E1 component, beta subunit (EC 1.2.4.4)	<a href=&#39;?page=Annotation&feature=fig|6666666.640627.peg.624&#39; target=_blank>fig|6666666.640627.peg.624</a>, <a href=&#39;?page=Annotation&feature=fig|6666666.640627.peg.1841&#39; target=_blank>fig|6666666.640627.peg.1841</a>	yes	<a href=&#39;?page=Annotation&feature=fig|6666666.640629.peg.395&#39; target=_blank>fig|6666666.640629.peg.395</a>	yes
A and B	Amino Acids and Derivatives	Branched-chain amino acids	Isoleucine degradation	Branched-chain amino acid aminotransferase (EC 2.6.1.42)	<a href=&#39;?page=Annotation&feature=fig|6666666.640627.peg.3759&#39; target=_blank>fig|6666666.640627.peg.3759</a>	yes	<a href=&#39;?page=Annotation&feature=fig|6666666.640629.peg.1533&#39; target=_blank>fig|6666666.640629.peg.1533</a>, <a href=&#39;?page=Annotation&feature=fig|6666666.640629.peg.2775&#39; target=_blank>fig|6666666.640629.peg.2775</a>	yes
A and B	Amino Acids and Derivatives	Branched-chain amino acids	Isoleucine degradation	Dihydrolipoamide acyltransferase component of branched-chain alpha-keto acid dehydrogenase complex (EC 2.3.1.168)	<a href=&#39;?page=Annotation&feature=fig|6666666.640627.peg.1840&#39; target=_blank>fig|6666666.640627.peg.1840</a>	yes	<a href=&#39;?page=Annotation&feature=fig|6666666.640629.peg.396&#39; target=_blank>fig|6666666.640629.peg.396</a>	yes
A and B	Amino Acids and Derivatives	Branched-chain amino acids	Isoleucine degradation	Dihydrolipoamide dehydrogenase of branched-chain alpha-keto acid dehydrogenase (EC 1.8.1.4)	<a href=&#39;?page=Annotation&feature=fig|6666666.640627.peg.1843&#39; target=_blank>fig|6666666.640627.peg.1843</a>	yes	<a href=&#39;?page=Annotation&feature=fig|6666666.640629.peg.393&#39; target=_blank>fig|6666666.640629.peg.393</a>	yes
A and B	Amino Acids and Derivatives	Branched-chain amino acids	Isoleucine degradation	Enoyl-CoA hydratase (EC 4.2.1.17)	<a href=&#39;?page=Annotation&feature=fig|6666666.640627.peg.290&#39; target=_blank>fig|6666666.640627.peg.290</a>, <a href=&#39;?page=Annotation&feature=fig|6666666.640627.peg.301&#39; target=_blank>fig|6666666.640627.peg.301</a>, <a href=&#39;?page=Annotation&feature=fig|6666666.640627.peg.302&#39; target=_blank>fig|6666666.640627.peg.302</a>, <a href=&#39;?page=Annotation&feature=fig|6666666.6…	yes	<a href=&#39;?page=Annotation&feature=fig|6666666.640629.peg.125&#39; target=_blank>fig|6666666.640629.peg.125</a>, <a href=&#39;?page=Annotation&feature=fig|6666666.640629.peg.1065&#39; target=_blank>fig|6666666.640629.peg.1065</a>, <a href=&#39;?page=Annotation&feature=fig|6666666.640629.peg.1380&#39; target=_blank>fig|6666666.640629.peg.1380</a>, <a href=&#39;?page=Annotation&feature=fig|66666…	yes
A and B	Amino Acids and Derivatives	Branched-chain amino acids	Isoleucine degradation	Transcriptional regulator BkdR of isoleucine and valine catabolism operon	<a href=&#39;?page=Annotation&feature=fig|6666666.640627.peg.1847&#39; target=_blank>fig|6666666.640627.peg.1847</a>	yes	<a href=&#39;?page=Annotation&feature=fig|6666666.640629.peg.389&#39; target=_blank>fig|6666666.640629.peg.389</a>	yes
A and B	Amino Acids and Derivatives	Branched-chain amino acids	Leucine Biosynthesis	2-isopropylmalate synthase (EC 2.3.3.13)	<a href=&#39;?page=Annotation&feature=fig|6666666.640627.peg.384&#39; target=_blank>fig|6666666.640627.peg.384</a>	yes	<a href=&#39;?page=Annotation&feature=fig|6666666.640629.peg.1537&#39; target=_blank>fig|6666666.640629.peg.1537</a>	yes
A and B	Amino Acids and Derivatives	Branched-chain amino acids	Leucine Biosynthesis	3-isopropylmalate dehydratase large subunit (EC 4.2.1.33)	<a href=&#39;?page=Annotation&feature=fig|6666666.640627.peg.386&#39; target=_blank>fig|6666666.640627.peg.386</a>	yes	<a href=&#39;?page=Annotation&feature=fig|6666666.640629.peg.1539&#39; target=_blank>fig|6666666.640629.peg.1539</a>	yes
A and B	Amino Acids and Derivatives	Branched-chain amino acids	Leucine Biosynthesis	3-isopropylmalate dehydratase small subunit (EC 4.2.1.33)	<a href=&#39;?page=Annotation&feature=fig|6666666.640627.peg.387&#39; target=_blank>fig|6666666.640627.peg.387</a>	yes	<a href=&#39;?page=Annotation&feature=fig|6666666.640629.peg.1540&#39; target=_blank>fig|6666666.640629.peg.1540</a>	yes
A and B	Amino Acids and Derivatives	Branched-chain amino acids	Leucine Biosynthesis	3-isopropylmalate dehydrogenase (EC 1.1.1.85)	<a href=&#39;?page=Annotation&feature=fig|6666666.640627.peg.385&#39; target=_blank>fig|6666666.640627.peg.385</a>	yes	<a href=&#39;?page=Annotation&feature=fig|6666666.640629.peg.1538&#39; target=_blank>fig|6666666.640629.peg.1538</a>	yes
A and B	Amino Acids and Derivatives	Branched-chain amino acids	Leucine Biosynthesis	Branched-chain amino acid aminotransferase (EC 2.6.1.42)	<a href=&#39;?page=Annotation&feature=fig|6666666.640627.peg.3759&#39; target=_blank>fig|6666666.640627.peg.3759</a>	yes	<a href=&#39;?page=Annotation&feature=fig|6666666.640629.peg.1533&#39; target=_blank>fig|6666666.640629.peg.1533</a>, <a href=&#39;?page=Annotation&feature=fig|6666666.640629.peg.2775&#39; target=_blank>fig|6666666.640629.peg.2775</a>	yes
A and B	Amino Acids and Derivatives	Branched-chain amino acids	Leucine Degradation and HMG-CoA Metabolism	Acetoacetyl-CoA synthetase (EC 6.2.1.16)	<a href=&#39;?page=Annotation&feature=fig|6666666.640627.peg.4091&#39; target=_blank>fig|6666666.640627.peg.4091</a>	yes	<a href=&#39;?page=Annotation&feature=fig|6666666.640629.peg.1105&#39; target=_blank>fig|6666666.640629.peg.1105</a>	yes
A and B	Amino Acids and Derivatives	Branched-chain amino acids	Leucine Degradation and HMG-CoA Metabolism	Biotin carboxyl carrier protein of methylcrotonyl-CoA carboxylase	<a href=&#39;?page=Annotation&feature=fig|6666666.640627.peg.4406&#39; target=_blank>fig|6666666.640627.peg.4406</a>	yes	<a href=&#39;?page=Annotation&feature=fig|6666666.640629.peg.2398&#39; target=_blank>fig|6666666.640629.peg.2398</a>	yes
A and B	Amino Acids and Derivatives	Branched-chain amino acids	Leucine Degradation and HMG-CoA Metabolism	Branched-chain alpha-keto acid dehydrogenase, E1 component, alpha subunit (EC 1.2.4.4)	<a href=&#39;?page=Annotation&feature=fig|6666666.640627.peg.623&#39; target=_blank>fig|6666666.640627.peg.623</a>, <a href=&#39;?page=Annotation&feature=fig|6666666.640627.peg.1842&#39; target=_blank>fig|6666666.640627.peg.1842</a>	yes	<a href=&#39;?page=Annotation&feature=fig|6666666.640629.peg.394&#39; target=_blank>fig|6666666.640629.peg.394</a>	yes
A and B	Amino Acids and Derivatives	Branched-chain amino acids	Leucine Degradation and HMG-CoA Metabolism	Branched-chain alpha-keto acid dehydrogenase, E1 component, beta subunit (EC 1.2.4.4)	<a href=&#39;?page=Annotation&feature=fig|6666666.640627.peg.624&#39; target=_blank>fig|6666666.640627.peg.624</a>, <a href=&#39;?page=Annotation&feature=fig|6666666.640627.peg.1841&#39; target=_blank>fig|6666666.640627.peg.1841</a>	yes	<a href=&#39;?page=Annotation&feature=fig|6666666.640629.peg.395&#39; target=_blank>fig|6666666.640629.peg.395</a>	yes
A and B	Amino Acids and Derivatives	Branched-chain amino acids	Leucine Degradation and HMG-CoA Metabolism	Branched-chain amino acid aminotransferase (EC 2.6.1.42)	<a href=&#39;?page=Annotation&feature=fig|6666666.640627.peg.3759&#39; target=_blank>fig|6666666.640627.peg.3759</a>	yes	<a href=&#39;?page=Annotation&feature=fig|6666666.640629.peg.1533&#39; target=_blank>fig|6666666.640629.peg.1533</a>, <a href=&#39;?page=Annotation&feature=fig|6666666.640629.peg.2775&#39; target=_blank>fig|6666666.640629.peg.2775</a>	yes
A and B	Amino Acids and Derivatives	Branched-chain amino acids	Leucine Degradation and HMG-CoA Metabolism	Dihydrolipoamide acyltransferase component of branched-chain alpha-keto acid dehydrogenase complex (EC 2.3.1.168)	<a href=&#39;?page=Annotation&feature=fig|6666666.640627.peg.1840&#39; target=_blank>fig|6666666.640627.peg.1840</a>	yes	<a href=&#39;?page=Annotation&feature=fig|6666666.640629.peg.396&#39; target=_blank>fig|6666666.640629.peg.396</a>	yes
A and B	Amino Acids and Derivatives	Branched-chain amino acids	Leucine Degradation and HMG-CoA Metabolism	Dihydrolipoamide dehydrogenase of branched-chain alpha-keto acid dehydrogenase (EC 1.8.1.4)	<a href=&#39;?page=Annotation&feature=fig|6666666.640627.peg.1843&#39; target=_blank>fig|6666666.640627.peg.1843</a>	yes	<a href=&#39;?page=Annotation&feature=fig|6666666.640629.peg.393&#39; target=_blank>fig|6666666.640629.peg.393</a>	yes
A and B	Amino Acids and Derivatives	Branched-chain amino acids	Leucine Degradation and HMG-CoA Metabolism	Hydroxymethylglutaryl-CoA lyase (EC 4.1.3.4)	<a href=&#39;?page=Annotation&feature=fig|6666666.640627.peg.336&#39; target=_blank>fig|6666666.640627.peg.336</a>	yes	<a href=&#39;?page=Annotation&feature=fig|6666666.640629.peg.2399&#39; target=_blank>fig|6666666.640629.peg.2399</a>	yes
A and B	Amino Acids and Derivatives	Branched-chain amino acids	Leucine Degradation and HMG-CoA Metabolism	Isovaleryl-CoA dehydrogenase (EC 1.3.8.4)	<a href=&#39;?page=Annotation&feature=fig|6666666.640627.peg.4403&#39; target=_blank>fig|6666666.640627.peg.4403</a>	yes	<a href=&#39;?page=Annotation&feature=fig|6666666.640629.peg.2395&#39; target=_blank>fig|6666666.640629.peg.2395</a>	yes
A and B	Amino Acids and Derivatives	Branched-chain amino acids	Leucine Degradation and HMG-CoA Metabolism	Methylcrotonyl-CoA carboxylase carboxyl transferase subunit (EC 6.4.1.4)	<a href=&#39;?page=Annotation&feature=fig|6666666.640627.peg.4408&#39; target=_blank>fig|6666666.640627.peg.4408</a>	yes	<a href=&#39;?page=Annotation&feature=fig|6666666.640629.peg.2401&#39; target=_blank>fig|6666666.640629.peg.2401</a>	yes
A and B	Amino Acids and Derivatives	Branched-chain amino acids	Leucine Degradation and HMG-CoA Metabolism	Succinyl-CoA:3-ketoacid-coenzyme A transferase subunit A (EC 2.8.3.5)	<a href=&#39;?page=Annotation&feature=fig|6666666.640627.peg.2469&#39; target=_blank>fig|6666666.640627.peg.2469</a>	yes	<a href=&#39;?page=Annotation&feature=fig|6666666.640629.peg.2856&#39; target=_blank>fig|6666666.640629.peg.2856</a>	yes
A and B	Amino Acids and Derivatives	Branched-chain amino acids	Leucine Degradation and HMG-CoA Metabolism	Succinyl-CoA:3-ketoacid-coenzyme A transferase subunit B (EC 2.8.3.5)	<a href=&#39;?page=Annotation&feature=fig|6666666.640627.peg.2468&#39; target=_blank>fig|6666666.640627.peg.2468</a>	yes	<a href=&#39;?page=Annotation&feature=fig|6666666.640629.peg.2855&#39; target=_blank>fig|6666666.640629.peg.2855</a>	yes
A and B	Amino Acids and Derivatives	Branched-chain amino acids	Valine degradation	3-hydroxyacyl-CoA dehydrogenase (EC 1.1.1.35)	<a href=&#39;?page=Annotation&feature=fig|6666666.640627.peg.304&#39; target=_blank>fig|6666666.640627.peg.304</a>	yes	<a href=&#39;?page=Annotation&feature=fig|6666666.640629.peg.1069&#39; target=_blank>fig|6666666.640629.peg.1069</a>, <a href=&#39;?page=Annotation&feature=fig|6666666.640629.peg.1072&#39; target=_blank>fig|6666666.640629.peg.1072</a>, <a href=&#39;?page=Annotation&feature=fig|6666666.640629.peg.2687&#39; target=_blank>fig|6666666.640629.peg.2687</a>	yes
A and B	Amino Acids and Derivatives	Branched-chain amino acids	Valine degradation	3-hydroxyisobutyrate dehydrogenase (EC 1.1.1.31)	<a href=&#39;?page=Annotation&feature=fig|6666666.640627.peg.4126&#39; target=_blank>fig|6666666.640627.peg.4126</a>	yes	<a href=&#39;?page=Annotation&feature=fig|6666666.640629.peg.3582&#39; target=_blank>fig|6666666.640629.peg.3582</a>	yes
A and B	Amino Acids and Derivatives	Branched-chain amino acids	Valine degradation	3-hydroxyisobutyryl-CoA hydrolase (EC 3.1.2.4)	<a href=&#39;?page=Annotation&feature=fig|6666666.640627.peg.4123&#39; target=_blank>fig|6666666.640627.peg.4123</a>	yes	<a href=&#39;?page=Annotation&feature=fig|6666666.640629.peg.3585&#39; target=_blank>fig|6666666.640629.peg.3585</a>	yes
A and B	Amino Acids and Derivatives	Branched-chain amino acids	Valine degradation	Branched-chain alpha-keto acid dehydrogenase, E1 component, alpha subunit (EC 1.2.4.4)	<a href=&#39;?page=Annotation&feature=fig|6666666.640627.peg.623&#39; target=_blank>fig|6666666.640627.peg.623</a>, <a href=&#39;?page=Annotation&feature=fig|6666666.640627.peg.1842&#39; target=_blank>fig|6666666.640627.peg.1842</a>	yes	<a href=&#39;?page=Annotation&feature=fig|6666666.640629.peg.394&#39; target=_blank>fig|6666666.640629.peg.394</a>	yes
A and B	Amino Acids and Derivatives	Branched-chain amino acids	Valine degradation	Branched-chain alpha-keto acid dehydrogenase, E1 component, beta subunit (EC 1.2.4.4)	<a href=&#39;?page=Annotation&feature=fig|6666666.640627.peg.624&#39; target=_blank>fig|6666666.640627.peg.624</a>, <a href=&#39;?page=Annotation&feature=fig|6666666.640627.peg.1841&#39; target=_blank>fig|6666666.640627.peg.1841</a>	yes	<a href=&#39;?page=Annotation&feature=fig|6666666.640629.peg.395&#39; target=_blank>fig|6666666.640629.peg.395</a>	yes
A and B	Amino Acids and Derivatives	Branched-chain amino acids	Valine degradation	Branched-chain amino acid aminotransferase (EC 2.6.1.42)	<a href=&#39;?page=Annotation&feature=fig|6666666.640627.peg.3759&#39; target=_blank>fig|6666666.640627.peg.3759</a>	yes	<a href=&#39;?page=Annotation&feature=fig|6666666.640629.peg.1533&#39; target=_blank>fig|6666666.640629.peg.1533</a>, <a href=&#39;?page=Annotation&feature=fig|6666666.640629.peg.2775&#39; target=_blank>fig|6666666.640629.peg.2775</a>	yes
A and B	Amino Acids and Derivatives	Branched-chain amino acids	Valine degradation	Dihydrolipoamide acyltransferase component of branched-chain alpha-keto acid dehydrogenase complex (EC 2.3.1.168)	<a href=&#39;?page=Annotation&feature=fig|6666666.640627.peg.1840&#39; target=_blank>fig|6666666.640627.peg.1840</a>	yes	<a href=&#39;?page=Annotation&feature=fig|6666666.640629.peg.396&#39; target=_blank>fig|6666666.640629.peg.396</a>	yes
A and B	Amino Acids and Derivatives	Branched-chain amino acids	Valine degradation	Dihydrolipoamide dehydrogenase of branched-chain alpha-keto acid dehydrogenase (EC 1.8.1.4)	<a href=&#39;?page=Annotation&feature=fig|6666666.640627.peg.1843&#39; target=_blank>fig|6666666.640627.peg.1843</a>	yes	<a href=&#39;?page=Annotation&feature=fig|6666666.640629.peg.393&#39; target=_blank>fig|6666666.640629.peg.393</a>	yes
A and B	Amino Acids and Derivatives	Branched-chain amino acids	Valine degradation	Enoyl-CoA hydratase (EC 4.2.1.17)	<a href=&#39;?page=Annotation&feature=fig|6666666.640627.peg.290&#39; target=_blank>fig|6666666.640627.peg.290</a>, <a href=&#39;?page=Annotation&feature=fig|6666666.640627.peg.301&#39; target=_blank>fig|6666666.640627.peg.301</a>, <a href=&#39;?page=Annotation&feature=fig|6666666.640627.peg.302&#39; target=_blank>fig|6666666.640627.peg.302</a>, <a href=&#39;?page=Annotation&feature=fig|6666666.6…	yes	<a href=&#39;?page=Annotation&feature=fig|6666666.640629.peg.125&#39; target=_blank>fig|6666666.640629.peg.125</a>, <a href=&#39;?page=Annotation&feature=fig|6666666.640629.peg.1065&#39; target=_blank>fig|6666666.640629.peg.1065</a>, <a href=&#39;?page=Annotation&feature=fig|6666666.640629.peg.1380&#39; target=_blank>fig|6666666.640629.peg.1380</a>, <a href=&#39;?page=Annotation&feature=fig|66666…	yes
A and B	Amino Acids and Derivatives	Branched-chain amino acids	Valine degradation	Methylmalonate-semialdehyde dehydrogenase (EC 1.2.1.27)	<a href=&#39;?page=Annotation&feature=fig|6666666.640627.peg.4125&#39; target=_blank>fig|6666666.640627.peg.4125</a>	yes	<a href=&#39;?page=Annotation&feature=fig|6666666.640629.peg.3583&#39; target=_blank>fig|6666666.640629.peg.3583</a>	yes
A and B	Amino Acids and Derivatives	Branched-chain amino acids	Valine degradation	Transcriptional regulator BkdR of isoleucine and valine catabolism operon	<a href=&#39;?page=Annotation&feature=fig|6666666.640627.peg.1847&#39; target=_blank>fig|6666666.640627.peg.1847</a>	yes	<a href=&#39;?page=Annotation&feature=fig|6666666.640629.peg.389&#39; target=_blank>fig|6666666.640629.peg.389</a>	yes
A	Amino Acids and Derivatives	Branched-chain amino acids	Branched-Chain Amino Acid Biosynthesis	Leucine-responsive regulatory protein, regulator for leucine (or lrp) regulon and high-affinity branched-chain amino acid transport system	<a href=&#39;?page=Annotation&feature=fig|6666666.640627.peg.538&#39; target=_blank>fig|6666666.640627.peg.538</a>	yes	<input type=&#39;button&#39; class=&#39;button&#39; value=&#39;find&#39; onclick=&#39;window.open("?page=SearchGene&fr=Leucine-responsive regulatory protein, regulator for leucine (or lrp) regulon and high-affinity branched-chain amino acid transport system&organism=6666666.640629&subsystem=Branched-Chain_Amino_Acid_Biosynthesis&template_gene=fig|6666666.640627.peg.538");&#39;>	no
A	Amino Acids and Derivatives	Branched-chain amino acids	Branched-Chain Amino Acid Biosynthesis	Threonine dehydratase biosynthetic (EC 4.3.1.19)	<a href=&#39;?page=Annotation&feature=fig|6666666.640627.peg.400&#39; target=_blank>fig|6666666.640627.peg.400</a>	yes	<input type=&#39;button&#39; class=&#39;button&#39; value=&#39;find&#39; onclick=&#39;window.open("?page=SearchGene&fr=Threonine dehydratase biosynthetic (EC 4.3.1.19)&organism=6666666.640629&subsystem=Branched-Chain_Amino_Acid_Biosynthesis&template_gene=fig|6666666.640627.peg.400");&#39;>	no
B	Amino Acids and Derivatives	Branched-chain amino acids	HMG CoA Synthesis	Acetoacetyl-CoA synthetase [leucine] (EC 6.2.1.16)	<input type=&#39;button&#39; value=&#39;find&#39; onclick=&#39;window.open("?page=SearchGene&fr=Acetoacetyl-CoA synthetase [leucine] (EC 6.2.1.16)&organism=6666666.640627&subsystem=HMG_CoA_Synthesis&template_gene=fig|6666666.640629.peg.2396");&#39;>	no	<a href=&#39;?page=Annotation&feature=fig|6666666.640629.peg.2396&#39; target=_blank>fig|6666666.640629.peg.2396</a>	yes
B	Amino Acids and Derivatives	Branched-chain amino acids	HMG CoA Synthesis	Methylglutaconyl-CoA hydratase (EC 4.2.1.18)	<input type=&#39;button&#39; value=&#39;find&#39; onclick=&#39;window.open("?page=SearchGene&fr=Methylglutaconyl-CoA hydratase (EC 4.2.1.18)&organism=6666666.640627&subsystem=HMG_CoA_Synthesis&template_gene=fig|6666666.640629.peg.2400");&#39;>	no	<a href=&#39;?page=Annotation&feature=fig|6666666.640629.peg.2400&#39; target=_blank>fig|6666666.640629.peg.2400</a>	yes
A and B	Amino Acids and Derivatives	Glutamine, glutamate, aspartate, asparagine; ammonia assimilation	Glutamate dehydrogenases	NAD-specific glutamate dehydrogenase (EC 1.4.1.2)	<a href=&#39;?page=Annotation&feature=fig|6666666.640627.peg.1774&#39; target=_blank>fig|6666666.640627.peg.1774</a>	yes	<a href=&#39;?page=Annotation&feature=fig|6666666.640629.peg.1566&#39; target=_blank>fig|6666666.640629.peg.1566</a>, <a href=&#39;?page=Annotation&feature=fig|6666666.640629.peg.2530&#39; target=_blank>fig|6666666.640629.peg.2530</a>, <a href=&#39;?page=Annotation&feature=fig|6666666.640629.peg.3181&#39; target=_blank>fig|6666666.640629.peg.3181</a>	yes
A and B	Amino Acids and Derivatives	Glutamine, glutamate, aspartate, asparagine; ammonia assimilation	Glutamine, Glutamate, Aspartate and Asparagine Biosynthesis	Asparagine synthetase [glutamine-hydrolyzing] (EC 6.3.5.4) AsnB	<a href=&#39;?page=Annotation&feature=fig|6666666.640627.peg.2391&#39; target=_blank>fig|6666666.640627.peg.2391</a>, <a href=&#39;?page=Annotation&feature=fig|6666666.640627.peg.4277&#39; target=_blank>fig|6666666.640627.peg.4277</a>	yes	<a href=&#39;?page=Annotation&feature=fig|6666666.640629.peg.4348&#39; target=_blank>fig|6666666.640629.peg.4348</a>	yes
A and B	Amino Acids and Derivatives	Glutamine, glutamate, aspartate, asparagine; ammonia assimilation	Glutamine, Glutamate, Aspartate and Asparagine Biosynthesis	Asparagine synthetase [glutamine-hydrolyzing] (EC 6.3.5.4) YisO	<a href=&#39;?page=Annotation&feature=fig|6666666.640627.peg.678&#39; target=_blank>fig|6666666.640627.peg.678</a>	yes	<a href=&#39;?page=Annotation&feature=fig|6666666.640629.peg.1443&#39; target=_blank>fig|6666666.640629.peg.1443</a>	yes
A and B	Amino Acids and Derivatives	Glutamine, glutamate, aspartate, asparagine; ammonia assimilation	Glutamine, Glutamate, Aspartate and Asparagine Biosynthesis	Aspartate aminotransferase (EC 2.6.1.1)	<a href=&#39;?page=Annotation&feature=fig|6666666.640627.peg.1720&#39; target=_blank>fig|6666666.640627.peg.1720</a>, <a href=&#39;?page=Annotation&feature=fig|6666666.640627.peg.2575&#39; target=_blank>fig|6666666.640627.peg.2575</a>	yes	<a href=&#39;?page=Annotation&feature=fig|6666666.640629.peg.518&#39; target=_blank>fig|6666666.640629.peg.518</a>, <a href=&#39;?page=Annotation&feature=fig|6666666.640629.peg.1220&#39; target=_blank>fig|6666666.640629.peg.1220</a>, <a href=&#39;?page=Annotation&feature=fig|6666666.640629.peg.2473&#39; target=_blank>fig|6666666.640629.peg.2473</a>	yes
A and B	Amino Acids and Derivatives	Glutamine, glutamate, aspartate, asparagine; ammonia assimilation	Glutamine, Glutamate, Aspartate and Asparagine Biosynthesis	Aspartate racemase (EC 5.1.1.13)	<a href=&#39;?page=Annotation&feature=fig|6666666.640627.peg.2976&#39; target=_blank>fig|6666666.640627.peg.2976</a>	yes	<a href=&#39;?page=Annotation&feature=fig|6666666.640629.peg.4188&#39; target=_blank>fig|6666666.640629.peg.4188</a>	yes
A and B	Amino Acids and Derivatives	Glutamine, glutamate, aspartate, asparagine; ammonia assimilation	Glutamine, Glutamate, Aspartate and Asparagine Biosynthesis	Glutamate racemase (EC 5.1.1.3)	<a href=&#39;?page=Annotation&feature=fig|6666666.640627.peg.2167&#39; target=_blank>fig|6666666.640627.peg.2167</a>	yes	<a href=&#39;?page=Annotation&feature=fig|6666666.640629.peg.138&#39; target=_blank>fig|6666666.640629.peg.138</a>, <a href=&#39;?page=Annotation&feature=fig|6666666.640629.peg.1162&#39; target=_blank>fig|6666666.640629.peg.1162</a>	yes
A and B	Amino Acids and Derivatives	Glutamine, glutamate, aspartate, asparagine; ammonia assimilation	Glutamine, Glutamate, Aspartate and Asparagine Biosynthesis	Glutamate synthase [NADPH] large chain (EC 1.4.1.13)	<a href=&#39;?page=Annotation&feature=fig|6666666.640627.peg.4289&#39; target=_blank>fig|6666666.640627.peg.4289</a>	yes	<a href=&#39;?page=Annotation&feature=fig|6666666.640629.peg.2741&#39; target=_blank>fig|6666666.640629.peg.2741</a>, <a href=&#39;?page=Annotation&feature=fig|6666666.640629.peg.4176&#39; target=_blank>fig|6666666.640629.peg.4176</a>	yes
A and B	Amino Acids and Derivatives	Glutamine, glutamate, aspartate, asparagine; ammonia assimilation	Glutamine, Glutamate, Aspartate and Asparagine Biosynthesis	Glutamate synthase [NADPH] small chain (EC 1.4.1.13)	<a href=&#39;?page=Annotation&feature=fig|6666666.640627.peg.4288&#39; target=_blank>fig|6666666.640627.peg.4288</a>	yes	<a href=&#39;?page=Annotation&feature=fig|6666666.640629.peg.4177&#39; target=_blank>fig|6666666.640629.peg.4177</a>	yes
A and B	Amino Acids and Derivatives	Glutamine, glutamate, aspartate, asparagine; ammonia assimilation	Glutamine, Glutamate, Aspartate and Asparagine Biosynthesis	Glutaminase (EC 3.5.1.2)	<a href=&#39;?page=Annotation&feature=fig|6666666.640627.peg.3642&#39; target=_blank>fig|6666666.640627.peg.3642</a>	yes	<a href=&#39;?page=Annotation&feature=fig|6666666.640629.peg.2273&#39; target=_blank>fig|6666666.640629.peg.2273</a>, <a href=&#39;?page=Annotation&feature=fig|6666666.640629.peg.3980&#39; target=_blank>fig|6666666.640629.peg.3980</a>	yes
A and B	Amino Acids and Derivatives	Glutamine, glutamate, aspartate, asparagine; ammonia assimilation	Glutamine, Glutamate, Aspartate and Asparagine Biosynthesis	Glutamine synthetase type I (EC 6.3.1.2)	<a href=&#39;?page=Annotation&feature=fig|6666666.640627.peg.1705&#39; target=_blank>fig|6666666.640627.peg.1705</a>	yes	<a href=&#39;?page=Annotation&feature=fig|6666666.640629.peg.2166&#39; target=_blank>fig|6666666.640629.peg.2166</a>, <a href=&#39;?page=Annotation&feature=fig|6666666.640629.peg.3514&#39; target=_blank>fig|6666666.640629.peg.3514</a>	yes
A and B	Amino Acids and Derivatives	Glutamine, glutamate, aspartate, asparagine; ammonia assimilation	Glutamine, Glutamate, Aspartate and Asparagine Biosynthesis	L-asparaginase (EC 3.5.1.1)	<a href=&#39;?page=Annotation&feature=fig|6666666.640627.peg.1772&#39; target=_blank>fig|6666666.640627.peg.1772</a>	yes	<a href=&#39;?page=Annotation&feature=fig|6666666.640629.peg.2528&#39; target=_blank>fig|6666666.640629.peg.2528</a>, <a href=&#39;?page=Annotation&feature=fig|6666666.640629.peg.3550&#39; target=_blank>fig|6666666.640629.peg.3550</a>	yes
A and B	Amino Acids and Derivatives	Glutamine, glutamate, aspartate, asparagine; ammonia assimilation	Glutamine, Glutamate, Aspartate and Asparagine Biosynthesis	NAD-specific glutamate dehydrogenase (EC 1.4.1.2)	<a href=&#39;?page=Annotation&feature=fig|6666666.640627.peg.1774&#39; target=_blank>fig|6666666.640627.peg.1774</a>	yes	<a href=&#39;?page=Annotation&feature=fig|6666666.640629.peg.1566&#39; target=_blank>fig|6666666.640629.peg.1566</a>, <a href=&#39;?page=Annotation&feature=fig|6666666.640629.peg.2530&#39; target=_blank>fig|6666666.640629.peg.2530</a>, <a href=&#39;?page=Annotation&feature=fig|6666666.640629.peg.3181&#39; target=_blank>fig|6666666.640629.peg.3181</a>	yes
A and B	Amino Acids and Derivatives	Glutamine, glutamate, aspartate, asparagine; ammonia assimilation	Glutamine synthetases	Glutamine synthetase type I (EC 6.3.1.2)	<a href=&#39;?page=Annotation&feature=fig|6666666.640627.peg.1705&#39; target=_blank>fig|6666666.640627.peg.1705</a>	yes	<a href=&#39;?page=Annotation&feature=fig|6666666.640629.peg.2166&#39; target=_blank>fig|6666666.640629.peg.2166</a>, <a href=&#39;?page=Annotation&feature=fig|6666666.640629.peg.3514&#39; target=_blank>fig|6666666.640629.peg.3514</a>	yes
A	Amino Acids and Derivatives	Glutamine, glutamate, aspartate, asparagine; ammonia assimilation	Glutamine, Glutamate, Aspartate and Asparagine Biosynthesis	Asparagine synthetase [glutamine-hydrolyzing] (EC 6.3.5.4)	<a href=&#39;?page=Annotation&feature=fig|6666666.640627.peg.4278&#39; target=_blank>fig|6666666.640627.peg.4278</a>	yes	<input type=&#39;button&#39; class=&#39;button&#39; value=&#39;find&#39; onclick=&#39;window.open("?page=SearchGene&fr=Asparagine synthetase [glutamine-hydrolyzing] (EC 6.3.5.4)&organism=6666666.640629&subsystem=Glutamine,_Glutamate,_Aspartate_and_Asparagine_Biosynthesis&template_gene=fig|6666666.640627.peg.4278");&#39;>	no
B	Amino Acids and Derivatives	Glutamine, glutamate, aspartate, asparagine; ammonia assimilation	Poly-gamma-glutamate biosynthesis	Gamma-glutamyltranspeptidase (EC 2.3.2.2)	<input type=&#39;button&#39; value=&#39;find&#39; onclick=&#39;window.open("?page=SearchGene&fr=Gamma-glutamyltranspeptidase (EC 2.3.2.2)&organism=6666666.640627&subsystem=Poly-gamma-glutamate_biosynthesis&template_gene=fig|6666666.640629.peg.992");&#39;>	no	<a href=&#39;?page=Annotation&feature=fig|6666666.640629.peg.992&#39; target=_blank>fig|6666666.640629.peg.992</a>, <a href=&#39;?page=Annotation&feature=fig|6666666.640629.peg.1063&#39; target=_blank>fig|6666666.640629.peg.1063</a>, <a href=&#39;?page=Annotation&feature=fig|6666666.640629.peg.1841&#39; target=_blank>fig|6666666.640629.peg.1841</a>	yes
B	Amino Acids and Derivatives	Glutamine, glutamate, aspartate, asparagine; ammonia assimilation	Poly-gamma-glutamate biosynthesis	Poly-gamma-glutamate synthase subunit PgsA/CapA (EC 6.3.2.-)	<input type=&#39;button&#39; value=&#39;find&#39; onclick=&#39;window.open("?page=SearchGene&fr=Poly-gamma-glutamate synthase subunit PgsA/CapA (EC 6.3.2.-)&organism=6666666.640627&subsystem=Poly-gamma-glutamate_biosynthesis&template_gene=fig|6666666.640629.peg.1842");&#39;>	no	<a href=&#39;?page=Annotation&feature=fig|6666666.640629.peg.1842&#39; target=_blank>fig|6666666.640629.peg.1842</a>	yes
B	Amino Acids and Derivatives	Glutamine, glutamate, aspartate, asparagine; ammonia assimilation	Poly-gamma-glutamate biosynthesis	Poly-gamma-glutamate synthase subunit PgsB/CapB (EC 6.3.2.-)	<input type=&#39;button&#39; value=&#39;find&#39; onclick=&#39;window.open("?page=SearchGene&fr=Poly-gamma-glutamate synthase subunit PgsB/CapB (EC 6.3.2.-)&organism=6666666.640627&subsystem=Poly-gamma-glutamate_biosynthesis&template_gene=fig|6666666.640629.peg.1844");&#39;>	no	<a href=&#39;?page=Annotation&feature=fig|6666666.640629.peg.1844&#39; target=_blank>fig|6666666.640629.peg.1844</a>, <a href=&#39;?page=Annotation&feature=fig|6666666.640629.peg.1845&#39; target=_blank>fig|6666666.640629.peg.1845</a>	yes
B	Amino Acids and Derivatives	Glutamine, glutamate, aspartate, asparagine; ammonia assimilation	Poly-gamma-glutamate biosynthesis	Poly-gamma-glutamate synthase subunit PgsC/CapC (EC 6.3.2.-)	<input type=&#39;button&#39; value=&#39;find&#39; onclick=&#39;window.open("?page=SearchGene&fr=Poly-gamma-glutamate synthase subunit PgsC/CapC (EC 6.3.2.-)&organism=6666666.640627&subsystem=Poly-gamma-glutamate_biosynthesis&template_gene=fig|6666666.640629.peg.1843");&#39;>	no	<a href=&#39;?page=Annotation&feature=fig|6666666.640629.peg.1843&#39; target=_blank>fig|6666666.640629.peg.1843</a>	yes
A and B	Amino Acids and Derivatives	Histidine Metabolism	Histidine Biosynthesis	ATP phosphoribosyltransferase regulatory subunit (EC 2.4.2.17)	<a href=&#39;?page=Annotation&feature=fig|6666666.640627.peg.4330&#39; target=_blank>fig|6666666.640627.peg.4330</a>	yes	<a href=&#39;?page=Annotation&feature=fig|6666666.640629.peg.871&#39; target=_blank>fig|6666666.640629.peg.871</a>	yes
A and B	Amino Acids and Derivatives	Histidine Metabolism	Histidine Biosynthesis	Histidinol dehydrogenase (EC 1.1.1.23)	<a href=&#39;?page=Annotation&feature=fig|6666666.640627.peg.4328&#39; target=_blank>fig|6666666.640627.peg.4328</a>	yes	<a href=&#39;?page=Annotation&feature=fig|6666666.640629.peg.869&#39; target=_blank>fig|6666666.640629.peg.869</a>, <a href=&#39;?page=Annotation&feature=fig|6666666.640629.peg.2725&#39; target=_blank>fig|6666666.640629.peg.2725</a>	yes
A and B	Amino Acids and Derivatives	Histidine Metabolism	Histidine Biosynthesis	Histidinol-phosphatase (EC 3.1.3.15)	<a href=&#39;?page=Annotation&feature=fig|6666666.640627.peg.4331&#39; target=_blank>fig|6666666.640627.peg.4331</a>	yes	<a href=&#39;?page=Annotation&feature=fig|6666666.640629.peg.45&#39; target=_blank>fig|6666666.640629.peg.45</a>, <a href=&#39;?page=Annotation&feature=fig|6666666.640629.peg.2882&#39; target=_blank>fig|6666666.640629.peg.2882</a>	yes
A and B	Amino Acids and Derivatives	Histidine Metabolism	Histidine Biosynthesis	Histidinol-phosphate aminotransferase (EC 2.6.1.9)	<a href=&#39;?page=Annotation&feature=fig|6666666.640627.peg.1743&#39; target=_blank>fig|6666666.640627.peg.1743</a>, <a href=&#39;?page=Annotation&feature=fig|6666666.640627.peg.4322&#39; target=_blank>fig|6666666.640627.peg.4322</a>	yes	<a href=&#39;?page=Annotation&feature=fig|6666666.640629.peg.2500&#39; target=_blank>fig|6666666.640629.peg.2500</a>	yes
A and B	Amino Acids and Derivatives	Histidine Metabolism	Histidine Biosynthesis	Imidazoleglycerol-phosphate dehydratase (EC 4.2.1.19)	<a href=&#39;?page=Annotation&feature=fig|6666666.640627.peg.4327&#39; target=_blank>fig|6666666.640627.peg.4327</a>	yes	<a href=&#39;?page=Annotation&feature=fig|6666666.640629.peg.868&#39; target=_blank>fig|6666666.640629.peg.868</a>	yes
A and B	Amino Acids and Derivatives	Histidine Metabolism	Histidine Biosynthesis	Phosphoribosyl-AMP cyclohydrolase (EC 3.5.4.19)	<a href=&#39;?page=Annotation&feature=fig|6666666.640627.peg.4323&#39; target=_blank>fig|6666666.640627.peg.4323</a>	yes	<a href=&#39;?page=Annotation&feature=fig|6666666.640629.peg.864&#39; target=_blank>fig|6666666.640629.peg.864</a>	yes
A and B	Amino Acids and Derivatives	Histidine Metabolism	Histidine Biosynthesis	Phosphoribosyl-ATP pyrophosphatase (EC 3.6.1.31)	<a href=&#39;?page=Annotation&feature=fig|6666666.640627.peg.4323&#39; target=_blank>fig|6666666.640627.peg.4323</a>	yes	<a href=&#39;?page=Annotation&feature=fig|6666666.640629.peg.864&#39; target=_blank>fig|6666666.640629.peg.864</a>	yes
A and B	Amino Acids and Derivatives	Histidine Metabolism	Histidine Biosynthesis	Phosphoribosylformimino-5-aminoimidazole carboxamide ribotide isomerase (EC 5.3.1.16)	<a href=&#39;?page=Annotation&feature=fig|6666666.640627.peg.4325&#39; target=_blank>fig|6666666.640627.peg.4325</a>	yes	<a href=&#39;?page=Annotation&feature=fig|6666666.640629.peg.866&#39; target=_blank>fig|6666666.640629.peg.866</a>	yes
A and B	Amino Acids and Derivatives	Histidine Metabolism	Histidine Degradation	Formiminoglutamase (EC 3.5.3.8)	<a href=&#39;?page=Annotation&feature=fig|6666666.640627.peg.76&#39; target=_blank>fig|6666666.640627.peg.76</a>	yes	<a href=&#39;?page=Annotation&feature=fig|6666666.640629.peg.3088&#39; target=_blank>fig|6666666.640629.peg.3088</a>	yes
A and B	Amino Acids and Derivatives	Histidine Metabolism	Histidine Degradation	Histidine ammonia-lyase (EC 4.3.1.3)	<a href=&#39;?page=Annotation&feature=fig|6666666.640627.peg.3433&#39; target=_blank>fig|6666666.640627.peg.3433</a>	yes	<a href=&#39;?page=Annotation&feature=fig|6666666.640629.peg.3085&#39; target=_blank>fig|6666666.640629.peg.3085</a>	yes
A and B	Amino Acids and Derivatives	Histidine Metabolism	Histidine Degradation	Hut operon positive regulatory protein	<a href=&#39;?page=Annotation&feature=fig|6666666.640627.peg.3434&#39; target=_blank>fig|6666666.640627.peg.3434</a>	yes	<a href=&#39;?page=Annotation&feature=fig|6666666.640629.peg.3084&#39; target=_blank>fig|6666666.640629.peg.3084</a>	yes
A and B	Amino Acids and Derivatives	Histidine Metabolism	Histidine Degradation	Imidazolonepropionase (EC 3.5.2.7)	<a href=&#39;?page=Annotation&feature=fig|6666666.640627.peg.3435&#39; target=_blank>fig|6666666.640627.peg.3435</a>	yes	<a href=&#39;?page=Annotation&feature=fig|6666666.640629.peg.3087&#39; target=_blank>fig|6666666.640629.peg.3087</a>	yes
A and B	Amino Acids and Derivatives	Histidine Metabolism	Histidine Degradation	Urocanate hydratase (EC 4.2.1.49)	<a href=&#39;?page=Annotation&feature=fig|6666666.640627.peg.3436&#39; target=_blank>fig|6666666.640627.peg.3436</a>	yes	<a href=&#39;?page=Annotation&feature=fig|6666666.640629.peg.3086&#39; target=_blank>fig|6666666.640629.peg.3086</a>	yes
A and B	Amino Acids and Derivatives	Lysine, threonine, methionine, and cysteine	Cysteine Biosynthesis	Adenylylsulfate kinase (EC 2.7.1.25)	<a href=&#39;?page=Annotation&feature=fig|6666666.640627.peg.4245&#39; target=_blank>fig|6666666.640627.peg.4245</a>	yes	<a href=&#39;?page=Annotation&feature=fig|6666666.640629.peg.2378&#39; target=_blank>fig|6666666.640629.peg.2378</a>	yes
A and B	Amino Acids and Derivatives	Lysine, threonine, methionine, and cysteine	Cysteine Biosynthesis	Cystathionine beta-synthase (EC 4.2.1.22)	<a href=&#39;?page=Annotation&feature=fig|6666666.640627.peg.137&#39; target=_blank>fig|6666666.640627.peg.137</a>	yes	<a href=&#39;?page=Annotation&feature=fig|6666666.640629.peg.3340&#39; target=_blank>fig|6666666.640629.peg.3340</a>	yes
A and B	Amino Acids and Derivatives	Lysine, threonine, methionine, and cysteine	Cysteine Biosynthesis	Cystathionine gamma-lyase (EC 4.4.1.1)	<a href=&#39;?page=Annotation&feature=fig|6666666.640627.peg.138&#39; target=_blank>fig|6666666.640627.peg.138</a>	yes	<a href=&#39;?page=Annotation&feature=fig|6666666.640629.peg.3341&#39; target=_blank>fig|6666666.640629.peg.3341</a>	yes
A and B	Amino Acids and Derivatives	Lysine, threonine, methionine, and cysteine	Cysteine Biosynthesis	Cysteine synthase (EC 2.5.1.47)	<a href=&#39;?page=Annotation&feature=fig|6666666.640627.peg.794&#39; target=_blank>fig|6666666.640627.peg.794</a>, <a href=&#39;?page=Annotation&feature=fig|6666666.640627.peg.4416&#39; target=_blank>fig|6666666.640627.peg.4416</a>	yes	<a href=&#39;?page=Annotation&feature=fig|6666666.640629.peg.3822&#39; target=_blank>fig|6666666.640629.peg.3822</a>, <a href=&#39;?page=Annotation&feature=fig|6666666.640629.peg.3860&#39; target=_blank>fig|6666666.640629.peg.3860</a>	yes
A and B	Amino Acids and Derivatives	Lysine, threonine, methionine, and cysteine	Cysteine Biosynthesis	Phosphoadenylyl-sulfate reductase [thioredoxin] (EC 1.8.4.8)	<a href=&#39;?page=Annotation&feature=fig|6666666.640627.peg.4236&#39; target=_blank>fig|6666666.640627.peg.4236</a>	yes	<a href=&#39;?page=Annotation&feature=fig|6666666.640629.peg.2376&#39; target=_blank>fig|6666666.640629.peg.2376</a>	yes
A and B	Amino Acids and Derivatives	Lysine, threonine, methionine, and cysteine	Cysteine Biosynthesis	Serine acetyltransferase (EC 2.3.1.30)	<a href=&#39;?page=Annotation&feature=fig|6666666.640627.peg.810&#39; target=_blank>fig|6666666.640627.peg.810</a>	yes	<a href=&#39;?page=Annotation&feature=fig|6666666.640629.peg.4164&#39; target=_blank>fig|6666666.640629.peg.4164</a>	yes
A and B	Amino Acids and Derivatives	Lysine, threonine, methionine, and cysteine	Cysteine Biosynthesis	Sulfate permease	<a href=&#39;?page=Annotation&feature=fig|6666666.640627.peg.1212&#39; target=_blank>fig|6666666.640627.peg.1212</a>, <a href=&#39;?page=Annotation&feature=fig|6666666.640627.peg.4111&#39; target=_blank>fig|6666666.640627.peg.4111</a>	yes	<a href=&#39;?page=Annotation&feature=fig|6666666.640629.peg.1341&#39; target=_blank>fig|6666666.640629.peg.1341</a>	yes
A and B	Amino Acids and Derivatives	Lysine, threonine, methionine, and cysteine	Cysteine Biosynthesis	Sulfite reductase [NADPH] flavoprotein alpha-component (EC 1.8.1.2)	<a href=&#39;?page=Annotation&feature=fig|6666666.640627.peg.4237&#39; target=_blank>fig|6666666.640627.peg.4237</a>	yes	<a href=&#39;?page=Annotation&feature=fig|6666666.640629.peg.2383&#39; target=_blank>fig|6666666.640629.peg.2383</a>	yes
A and B	Amino Acids and Derivatives	Lysine, threonine, methionine, and cysteine	Cysteine Biosynthesis	Sulfite reductase [NADPH] hemoprotein beta-component (EC 1.8.1.2)	<a href=&#39;?page=Annotation&feature=fig|6666666.640627.peg.4238&#39; target=_blank>fig|6666666.640627.peg.4238</a>	yes	<a href=&#39;?page=Annotation&feature=fig|6666666.640629.peg.2384&#39; target=_blank>fig|6666666.640629.peg.2384</a>	yes
A and B	Amino Acids and Derivatives	Lysine, threonine, methionine, and cysteine	Lysine Biosynthesis DAP Pathway	2,3,4,5-tetrahydropyridine-2,6-dicarboxylate N-acetyltransferase (EC 2.3.1.89)	<a href=&#39;?page=Annotation&feature=fig|6666666.640627.peg.1447&#39; target=_blank>fig|6666666.640627.peg.1447</a>	yes	<a href=&#39;?page=Annotation&feature=fig|6666666.640629.peg.2229&#39; target=_blank>fig|6666666.640629.peg.2229</a>	yes
A and B	Amino Acids and Derivatives	Lysine, threonine, methionine, and cysteine	Lysine Biosynthesis DAP Pathway	4-hydroxy-tetrahydrodipicolinate reductase (EC 1.17.1.8)	<a href=&#39;?page=Annotation&feature=fig|6666666.640627.peg.1728&#39; target=_blank>fig|6666666.640627.peg.1728</a>	yes	<a href=&#39;?page=Annotation&feature=fig|6666666.640629.peg.2484&#39; target=_blank>fig|6666666.640629.peg.2484</a>	yes
A and B	Amino Acids and Derivatives	Lysine, threonine, methionine, and cysteine	Lysine Biosynthesis DAP Pathway	4-hydroxy-tetrahydrodipicolinate synthase (EC 4.3.3.7)	<a href=&#39;?page=Annotation&feature=fig|6666666.640627.peg.1671&#39; target=_blank>fig|6666666.640627.peg.1671</a>, <a href=&#39;?page=Annotation&feature=fig|6666666.640627.peg.3439&#39; target=_blank>fig|6666666.640627.peg.3439</a>	yes	<a href=&#39;?page=Annotation&feature=fig|6666666.640629.peg.2773&#39; target=_blank>fig|6666666.640629.peg.2773</a>, <a href=&#39;?page=Annotation&feature=fig|6666666.640629.peg.3479&#39; target=_blank>fig|6666666.640629.peg.3479</a>	yes
A and B	Amino Acids and Derivatives	Lysine, threonine, methionine, and cysteine	Lysine Biosynthesis DAP Pathway	Aspartate-semialdehyde dehydrogenase (EC 1.2.1.11)	<a href=&#39;?page=Annotation&feature=fig|6666666.640627.peg.1669&#39; target=_blank>fig|6666666.640627.peg.1669</a>	yes	<a href=&#39;?page=Annotation&feature=fig|6666666.640629.peg.3477&#39; target=_blank>fig|6666666.640629.peg.3477</a>	yes
A and B	Amino Acids and Derivatives	Lysine, threonine, methionine, and cysteine	Lysine Biosynthesis DAP Pathway	Aspartokinase (EC 2.7.2.4)	<a href=&#39;?page=Annotation&feature=fig|6666666.640627.peg.1670&#39; target=_blank>fig|6666666.640627.peg.1670</a>, <a href=&#39;?page=Annotation&feature=fig|6666666.640627.peg.1849&#39; target=_blank>fig|6666666.640627.peg.1849</a>, <a href=&#39;?page=Annotation&feature=fig|6666666.640627.peg.4016&#39; target=_blank>fig|6666666.640627.peg.4016</a>	yes	<a href=&#39;?page=Annotation&feature=fig|6666666.640629.peg.385&#39; target=_blank>fig|6666666.640629.peg.385</a>, <a href=&#39;?page=Annotation&feature=fig|6666666.640629.peg.2843&#39; target=_blank>fig|6666666.640629.peg.2843</a>, <a href=&#39;?page=Annotation&feature=fig|6666666.640629.peg.3478&#39; target=_blank>fig|6666666.640629.peg.3478</a>	yes
A and B	Amino Acids and Derivatives	Lysine, threonine, methionine, and cysteine	Lysine Biosynthesis DAP Pathway	Diaminopimelate decarboxylase (EC 4.1.1.20)	<a href=&#39;?page=Annotation&feature=fig|6666666.640627.peg.1803&#39; target=_blank>fig|6666666.640627.peg.1803</a>, <a href=&#39;?page=Annotation&feature=fig|6666666.640627.peg.1804&#39; target=_blank>fig|6666666.640627.peg.1804</a>, <a href=&#39;?page=Annotation&feature=fig|6666666.640627.peg.1805&#39; target=_blank>fig|6666666.640627.peg.1805</a>	yes	<a href=&#39;?page=Annotation&feature=fig|6666666.640629.peg.1572&#39; target=_blank>fig|6666666.640629.peg.1572</a>, <a href=&#39;?page=Annotation&feature=fig|6666666.640629.peg.1573&#39; target=_blank>fig|6666666.640629.peg.1573</a>, <a href=&#39;?page=Annotation&feature=fig|6666666.640629.peg.2565&#39; target=_blank>fig|6666666.640629.peg.2565</a>	yes
A and B	Amino Acids and Derivatives	Lysine, threonine, methionine, and cysteine	Lysine Biosynthesis DAP Pathway	Diaminopimelate epimerase (EC 5.1.1.7)	<a href=&#39;?page=Annotation&feature=fig|6666666.640627.peg.2348&#39; target=_blank>fig|6666666.640627.peg.2348</a>	yes	<a href=&#39;?page=Annotation&feature=fig|6666666.640629.peg.2075&#39; target=_blank>fig|6666666.640629.peg.2075</a>	yes
A and B	Amino Acids and Derivatives	Lysine, threonine, methionine, and cysteine	Lysine Biosynthesis DAP Pathway	N-acetyl-L,L-diaminopimelate aminotransferase (EC 2.6.1.-)	<a href=&#39;?page=Annotation&feature=fig|6666666.640627.peg.1437&#39; target=_blank>fig|6666666.640627.peg.1437</a>	yes	<a href=&#39;?page=Annotation&feature=fig|6666666.640629.peg.2206&#39; target=_blank>fig|6666666.640629.peg.2206</a>	yes
A and B	Amino Acids and Derivatives	Lysine, threonine, methionine, and cysteine	Lysine Biosynthesis DAP Pathway	N-acetyl-L,L-diaminopimelate deacetylase (EC 3.5.1.47)	<a href=&#39;?page=Annotation&feature=fig|6666666.640627.peg.1448&#39; target=_blank>fig|6666666.640627.peg.1448</a>	yes	<a href=&#39;?page=Annotation&feature=fig|6666666.640629.peg.2231&#39; target=_blank>fig|6666666.640629.peg.2231</a>	yes
A and B	Amino Acids and Derivatives	Lysine, threonine, methionine, and cysteine	Lysine Biosynthesis DAP Pathway, GJO scratch	2,3,4,5-tetrahydropyridine-2,6-dicarboxylate N-acetyltransferase (EC 2.3.1.89)	<a href=&#39;?page=Annotation&feature=fig|6666666.640627.peg.1447&#39; target=_blank>fig|6666666.640627.peg.1447</a>	yes	<a href=&#39;?page=Annotation&feature=fig|6666666.640629.peg.2229&#39; target=_blank>fig|6666666.640629.peg.2229</a>	yes
A and B	Amino Acids and Derivatives	Lysine, threonine, methionine, and cysteine	Lysine Biosynthesis DAP Pathway, GJO scratch	4-hydroxy-tetrahydrodipicolinate reductase (EC 1.17.1.8)	<a href=&#39;?page=Annotation&feature=fig|6666666.640627.peg.1728&#39; target=_blank>fig|6666666.640627.peg.1728</a>	yes	<a href=&#39;?page=Annotation&feature=fig|6666666.640629.peg.2484&#39; target=_blank>fig|6666666.640629.peg.2484</a>	yes
A and B	Amino Acids and Derivatives	Lysine, threonine, methionine, and cysteine	Lysine Biosynthesis DAP Pathway, GJO scratch	4-hydroxy-tetrahydrodipicolinate synthase (EC 4.3.3.7)	<a href=&#39;?page=Annotation&feature=fig|6666666.640627.peg.1671&#39; target=_blank>fig|6666666.640627.peg.1671</a>, <a href=&#39;?page=Annotation&feature=fig|6666666.640627.peg.3439&#39; target=_blank>fig|6666666.640627.peg.3439</a>	yes	<a href=&#39;?page=Annotation&feature=fig|6666666.640629.peg.2773&#39; target=_blank>fig|6666666.640629.peg.2773</a>, <a href=&#39;?page=Annotation&feature=fig|6666666.640629.peg.3479&#39; target=_blank>fig|6666666.640629.peg.3479</a>	yes
A and B	Amino Acids and Derivatives	Lysine, threonine, methionine, and cysteine	Lysine Biosynthesis DAP Pathway, GJO scratch	Aspartate-semialdehyde dehydrogenase (EC 1.2.1.11)	<a href=&#39;?page=Annotation&feature=fig|6666666.640627.peg.1669&#39; target=_blank>fig|6666666.640627.peg.1669</a>	yes	<a href=&#39;?page=Annotation&feature=fig|6666666.640629.peg.3477&#39; target=_blank>fig|6666666.640629.peg.3477</a>	yes
A and B	Amino Acids and Derivatives	Lysine, threonine, methionine, and cysteine	Lysine Biosynthesis DAP Pathway, GJO scratch	Aspartokinase (EC 2.7.2.4)	<a href=&#39;?page=Annotation&feature=fig|6666666.640627.peg.1670&#39; target=_blank>fig|6666666.640627.peg.1670</a>, <a href=&#39;?page=Annotation&feature=fig|6666666.640627.peg.1849&#39; target=_blank>fig|6666666.640627.peg.1849</a>, <a href=&#39;?page=Annotation&feature=fig|6666666.640627.peg.4016&#39; target=_blank>fig|6666666.640627.peg.4016</a>	yes	<a href=&#39;?page=Annotation&feature=fig|6666666.640629.peg.385&#39; target=_blank>fig|6666666.640629.peg.385</a>, <a href=&#39;?page=Annotation&feature=fig|6666666.640629.peg.2843&#39; target=_blank>fig|6666666.640629.peg.2843</a>, <a href=&#39;?page=Annotation&feature=fig|6666666.640629.peg.3478&#39; target=_blank>fig|6666666.640629.peg.3478</a>	yes
A and B	Amino Acids and Derivatives	Lysine, threonine, methionine, and cysteine	Lysine Biosynthesis DAP Pathway, GJO scratch	Diaminopimelate decarboxylase (EC 4.1.1.20)	<a href=&#39;?page=Annotation&feature=fig|6666666.640627.peg.1803&#39; target=_blank>fig|6666666.640627.peg.1803</a>, <a href=&#39;?page=Annotation&feature=fig|6666666.640627.peg.1804&#39; target=_blank>fig|6666666.640627.peg.1804</a>, <a href=&#39;?page=Annotation&feature=fig|6666666.640627.peg.1805&#39; target=_blank>fig|6666666.640627.peg.1805</a>	yes	<a href=&#39;?page=Annotation&feature=fig|6666666.640629.peg.1572&#39; target=_blank>fig|6666666.640629.peg.1572</a>, <a href=&#39;?page=Annotation&feature=fig|6666666.640629.peg.1573&#39; target=_blank>fig|6666666.640629.peg.1573</a>, <a href=&#39;?page=Annotation&feature=fig|6666666.640629.peg.2565&#39; target=_blank>fig|6666666.640629.peg.2565</a>	yes
A and B	Amino Acids and Derivatives	Lysine, threonine, methionine, and cysteine	Lysine Biosynthesis DAP Pathway, GJO scratch	Diaminopimelate epimerase (EC 5.1.1.7)	<a href=&#39;?page=Annotation&feature=fig|6666666.640627.peg.2348&#39; target=_blank>fig|6666666.640627.peg.2348</a>	yes	<a href=&#39;?page=Annotation&feature=fig|6666666.640629.peg.2075&#39; target=_blank>fig|6666666.640629.peg.2075</a>	yes
A and B	Amino Acids and Derivatives	Lysine, threonine, methionine, and cysteine	Lysine Biosynthesis DAP Pathway, GJO scratch	N-acetyl-L,L-diaminopimelate aminotransferase (EC 2.6.1.-)	<a href=&#39;?page=Annotation&feature=fig|6666666.640627.peg.1437&#39; target=_blank>fig|6666666.640627.peg.1437</a>	yes	<a href=&#39;?page=Annotation&feature=fig|6666666.640629.peg.2206&#39; target=_blank>fig|6666666.640629.peg.2206</a>	yes
A and B	Amino Acids and Derivatives	Lysine, threonine, methionine, and cysteine	Lysine Biosynthesis DAP Pathway, GJO scratch	N-acetyl-L,L-diaminopimelate deacetylase (EC 3.5.1.47)	<a href=&#39;?page=Annotation&feature=fig|6666666.640627.peg.1448&#39; target=_blank>fig|6666666.640627.peg.1448</a>	yes	<a href=&#39;?page=Annotation&feature=fig|6666666.640629.peg.2231&#39; target=_blank>fig|6666666.640629.peg.2231</a>	yes
A and B	Amino Acids and Derivatives	Lysine, threonine, methionine, and cysteine	Methionine Biosynthesis	5,10-methylenetetrahydrofolate reductase (EC 1.5.1.20)	<a href=&#39;?page=Annotation&feature=fig|6666666.640627.peg.1020&#39; target=_blank>fig|6666666.640627.peg.1020</a>	yes	<a href=&#39;?page=Annotation&feature=fig|6666666.640629.peg.3974&#39; target=_blank>fig|6666666.640629.peg.3974</a>	yes
A and B	Amino Acids and Derivatives	Lysine, threonine, methionine, and cysteine	Methionine Biosynthesis	5-methyltetrahydropteroyltriglutamate--homocysteine methyltransferase (EC 2.1.1.14)	<a href=&#39;?page=Annotation&feature=fig|6666666.640627.peg.1021&#39; target=_blank>fig|6666666.640627.peg.1021</a>	yes	<a href=&#39;?page=Annotation&feature=fig|6666666.640629.peg.1284&#39; target=_blank>fig|6666666.640629.peg.1284</a>	yes
A and B	Amino Acids and Derivatives	Lysine, threonine, methionine, and cysteine	Methionine Biosynthesis	Cystathionine beta-lyase (EC 4.4.1.8)	<a href=&#39;?page=Annotation&feature=fig|6666666.640627.peg.2335&#39; target=_blank>fig|6666666.640627.peg.2335</a>	yes	<a href=&#39;?page=Annotation&feature=fig|6666666.640629.peg.713&#39; target=_blank>fig|6666666.640629.peg.713</a>, <a href=&#39;?page=Annotation&feature=fig|6666666.640629.peg.3975&#39; target=_blank>fig|6666666.640629.peg.3975</a>	yes
A and B	Amino Acids and Derivatives	Lysine, threonine, methionine, and cysteine	Methionine Biosynthesis	Cystathionine beta-synthase (EC 4.2.1.22)	<a href=&#39;?page=Annotation&feature=fig|6666666.640627.peg.137&#39; target=_blank>fig|6666666.640627.peg.137</a>	yes	<a href=&#39;?page=Annotation&feature=fig|6666666.640629.peg.3340&#39; target=_blank>fig|6666666.640629.peg.3340</a>	yes
A and B	Amino Acids and Derivatives	Lysine, threonine, methionine, and cysteine	Methionine Biosynthesis	Cystathionine gamma-lyase (EC 4.4.1.1)	<a href=&#39;?page=Annotation&feature=fig|6666666.640627.peg.138&#39; target=_blank>fig|6666666.640627.peg.138</a>	yes	<a href=&#39;?page=Annotation&feature=fig|6666666.640629.peg.3341&#39; target=_blank>fig|6666666.640629.peg.3341</a>	yes
A and B	Amino Acids and Derivatives	Lysine, threonine, methionine, and cysteine	Methionine Biosynthesis	Cystathionine gamma-synthase (EC 2.5.1.48)	<a href=&#39;?page=Annotation&feature=fig|6666666.640627.peg.3166&#39; target=_blank>fig|6666666.640627.peg.3166</a>	yes	<a href=&#39;?page=Annotation&feature=fig|6666666.640629.peg.3976&#39; target=_blank>fig|6666666.640629.peg.3976</a>, <a href=&#39;?page=Annotation&feature=fig|6666666.640629.peg.4322&#39; target=_blank>fig|6666666.640629.peg.4322</a>	yes
A and B	Amino Acids and Derivatives	Lysine, threonine, methionine, and cysteine	Methionine Biosynthesis	Cysteine synthase (EC 2.5.1.47)	<a href=&#39;?page=Annotation&feature=fig|6666666.640627.peg.794&#39; target=_blank>fig|6666666.640627.peg.794</a>, <a href=&#39;?page=Annotation&feature=fig|6666666.640627.peg.4416&#39; target=_blank>fig|6666666.640627.peg.4416</a>	yes	<a href=&#39;?page=Annotation&feature=fig|6666666.640629.peg.3822&#39; target=_blank>fig|6666666.640629.peg.3822</a>, <a href=&#39;?page=Annotation&feature=fig|6666666.640629.peg.3860&#39; target=_blank>fig|6666666.640629.peg.3860</a>	yes
A and B	Amino Acids and Derivatives	Lysine, threonine, methionine, and cysteine	Methionine Biosynthesis	Homoserine dehydrogenase (EC 1.1.1.3)	<a href=&#39;?page=Annotation&feature=fig|6666666.640627.peg.3461&#39; target=_blank>fig|6666666.640627.peg.3461</a>	yes	<a href=&#39;?page=Annotation&feature=fig|6666666.640629.peg.3119&#39; target=_blank>fig|6666666.640629.peg.3119</a>, <a href=&#39;?page=Annotation&feature=fig|6666666.640629.peg.4324&#39; target=_blank>fig|6666666.640629.peg.4324</a>	yes
A and B	Amino Acids and Derivatives	Lysine, threonine, methionine, and cysteine	Methionine Biosynthesis	Homoserine kinase (EC 2.7.1.39)	<a href=&#39;?page=Annotation&feature=fig|6666666.640627.peg.3459&#39; target=_blank>fig|6666666.640627.peg.3459</a>	yes	<a href=&#39;?page=Annotation&feature=fig|6666666.640629.peg.3117&#39; target=_blank>fig|6666666.640629.peg.3117</a>	yes
A and B	Amino Acids and Derivatives	Lysine, threonine, methionine, and cysteine	Methionine Biosynthesis	Methionine ABC transporter ATP-binding protein	<a href=&#39;?page=Annotation&feature=fig|6666666.640627.peg.471&#39; target=_blank>fig|6666666.640627.peg.471</a>, <a href=&#39;?page=Annotation&feature=fig|6666666.640627.peg.2415&#39; target=_blank>fig|6666666.640627.peg.2415</a>	yes	<a href=&#39;?page=Annotation&feature=fig|6666666.640629.peg.755&#39; target=_blank>fig|6666666.640629.peg.755</a>, <a href=&#39;?page=Annotation&feature=fig|6666666.640629.peg.4221&#39; target=_blank>fig|6666666.640629.peg.4221</a>	yes
A and B	Amino Acids and Derivatives	Lysine, threonine, methionine, and cysteine	Methionine Biosynthesis	Methionine ABC transporter permease protein	<a href=&#39;?page=Annotation&feature=fig|6666666.640627.peg.470&#39; target=_blank>fig|6666666.640627.peg.470</a>, <a href=&#39;?page=Annotation&feature=fig|6666666.640627.peg.2414&#39; target=_blank>fig|6666666.640627.peg.2414</a>	yes	<a href=&#39;?page=Annotation&feature=fig|6666666.640629.peg.754&#39; target=_blank>fig|6666666.640629.peg.754</a>, <a href=&#39;?page=Annotation&feature=fig|6666666.640629.peg.4222&#39; target=_blank>fig|6666666.640629.peg.4222</a>	yes
A and B	Amino Acids and Derivatives	Lysine, threonine, methionine, and cysteine	Methionine Biosynthesis	Methionine ABC transporter substrate-binding protein	<a href=&#39;?page=Annotation&feature=fig|6666666.640627.peg.469&#39; target=_blank>fig|6666666.640627.peg.469</a>, <a href=&#39;?page=Annotation&feature=fig|6666666.640627.peg.2413&#39; target=_blank>fig|6666666.640627.peg.2413</a>	yes	<a href=&#39;?page=Annotation&feature=fig|6666666.640629.peg.753&#39; target=_blank>fig|6666666.640629.peg.753</a>, <a href=&#39;?page=Annotation&feature=fig|6666666.640629.peg.4223&#39; target=_blank>fig|6666666.640629.peg.4223</a>	yes
A and B	Amino Acids and Derivatives	Lysine, threonine, methionine, and cysteine	Methionine Biosynthesis	O-acetylhomoserine sulfhydrylase (EC 2.5.1.49)	<a href=&#39;?page=Annotation&feature=fig|6666666.640627.peg.3669&#39; target=_blank>fig|6666666.640627.peg.3669</a>, <a href=&#39;?page=Annotation&feature=fig|6666666.640627.peg.3910&#39; target=_blank>fig|6666666.640627.peg.3910</a>	yes	<a href=&#39;?page=Annotation&feature=fig|6666666.640629.peg.3784&#39; target=_blank>fig|6666666.640629.peg.3784</a>, <a href=&#39;?page=Annotation&feature=fig|6666666.640629.peg.3786&#39; target=_blank>fig|6666666.640629.peg.3786</a>, <a href=&#39;?page=Annotation&feature=fig|6666666.640629.peg.3841&#39; target=_blank>fig|6666666.640629.peg.3841</a>	yes
A and B	Amino Acids and Derivatives	Lysine, threonine, methionine, and cysteine	Methionine Biosynthesis	O-succinylhomoserine sulfhydrylase (EC 2.5.1.48)	<a href=&#39;?page=Annotation&feature=fig|6666666.640627.peg.3669&#39; target=_blank>fig|6666666.640627.peg.3669</a>, <a href=&#39;?page=Annotation&feature=fig|6666666.640627.peg.3910&#39; target=_blank>fig|6666666.640627.peg.3910</a>	yes	<a href=&#39;?page=Annotation&feature=fig|6666666.640629.peg.3784&#39; target=_blank>fig|6666666.640629.peg.3784</a>, <a href=&#39;?page=Annotation&feature=fig|6666666.640629.peg.3786&#39; target=_blank>fig|6666666.640629.peg.3786</a>, <a href=&#39;?page=Annotation&feature=fig|6666666.640629.peg.3841&#39; target=_blank>fig|6666666.640629.peg.3841</a>	yes
A and B	Amino Acids and Derivatives	Lysine, threonine, methionine, and cysteine	Methionine Biosynthesis	S-adenosylhomocysteine nucleosidase (EC 3.2.2.9)	<a href=&#39;?page=Annotation&feature=fig|6666666.640627.peg.1994&#39; target=_blank>fig|6666666.640627.peg.1994</a>	yes	<a href=&#39;?page=Annotation&feature=fig|6666666.640629.peg.236&#39; target=_blank>fig|6666666.640629.peg.236</a>, <a href=&#39;?page=Annotation&feature=fig|6666666.640629.peg.1241&#39; target=_blank>fig|6666666.640629.peg.1241</a>, <a href=&#39;?page=Annotation&feature=fig|6666666.640629.peg.1973&#39; target=_blank>fig|6666666.640629.peg.1973</a>	yes
A and B	Amino Acids and Derivatives	Lysine, threonine, methionine, and cysteine	Methionine Biosynthesis	S-adenosylmethionine synthetase (EC 2.5.1.6)	<a href=&#39;?page=Annotation&feature=fig|6666666.640627.peg.2308&#39; target=_blank>fig|6666666.640627.peg.2308</a>	yes	<a href=&#39;?page=Annotation&feature=fig|6666666.640629.peg.683&#39; target=_blank>fig|6666666.640629.peg.683</a>	yes
A and B	Amino Acids and Derivatives	Lysine, threonine, methionine, and cysteine	Methionine Biosynthesis	S-ribosylhomocysteine lyase (EC 4.4.1.21)	<a href=&#39;?page=Annotation&feature=fig|6666666.640627.peg.136&#39; target=_blank>fig|6666666.640627.peg.136</a>	yes	<a href=&#39;?page=Annotation&feature=fig|6666666.640629.peg.3339&#39; target=_blank>fig|6666666.640629.peg.3339</a>	yes
A and B	Amino Acids and Derivatives	Lysine, threonine, methionine, and cysteine	Methionine Biosynthesis	SAM-dependent methlytransferase YrrT	<a href=&#39;?page=Annotation&feature=fig|6666666.640627.peg.135&#39; target=_blank>fig|6666666.640627.peg.135</a>	yes	<a href=&#39;?page=Annotation&feature=fig|6666666.640629.peg.3338&#39; target=_blank>fig|6666666.640629.peg.3338</a>	yes
A and B	Amino Acids and Derivatives	Lysine, threonine, methionine, and cysteine	Methionine Biosynthesis	Serine acetyltransferase (EC 2.3.1.30)	<a href=&#39;?page=Annotation&feature=fig|6666666.640627.peg.810&#39; target=_blank>fig|6666666.640627.peg.810</a>	yes	<a href=&#39;?page=Annotation&feature=fig|6666666.640629.peg.4164&#39; target=_blank>fig|6666666.640629.peg.4164</a>	yes
A and B	Amino Acids and Derivatives	Lysine, threonine, methionine, and cysteine	Methionine Degradation	Cystathionine beta-synthase (EC 4.2.1.22)	<a href=&#39;?page=Annotation&feature=fig|6666666.640627.peg.137&#39; target=_blank>fig|6666666.640627.peg.137</a>	yes	<a href=&#39;?page=Annotation&feature=fig|6666666.640629.peg.3340&#39; target=_blank>fig|6666666.640629.peg.3340</a>	yes
A and B	Amino Acids and Derivatives	Lysine, threonine, methionine, and cysteine	Methionine Degradation	Cystathionine gamma-lyase (EC 4.4.1.1)	<a href=&#39;?page=Annotation&feature=fig|6666666.640627.peg.138&#39; target=_blank>fig|6666666.640627.peg.138</a>	yes	<a href=&#39;?page=Annotation&feature=fig|6666666.640629.peg.3341&#39; target=_blank>fig|6666666.640629.peg.3341</a>	yes
A and B	Amino Acids and Derivatives	Lysine, threonine, methionine, and cysteine	Methionine Degradation	Methionine ABC transporter ATP-binding protein	<a href=&#39;?page=Annotation&feature=fig|6666666.640627.peg.471&#39; target=_blank>fig|6666666.640627.peg.471</a>, <a href=&#39;?page=Annotation&feature=fig|6666666.640627.peg.2415&#39; target=_blank>fig|6666666.640627.peg.2415</a>	yes	<a href=&#39;?page=Annotation&feature=fig|6666666.640629.peg.755&#39; target=_blank>fig|6666666.640629.peg.755</a>, <a href=&#39;?page=Annotation&feature=fig|6666666.640629.peg.4221&#39; target=_blank>fig|6666666.640629.peg.4221</a>	yes
A and B	Amino Acids and Derivatives	Lysine, threonine, methionine, and cysteine	Methionine Degradation	Methionine ABC transporter permease protein	<a href=&#39;?page=Annotation&feature=fig|6666666.640627.peg.470&#39; target=_blank>fig|6666666.640627.peg.470</a>, <a href=&#39;?page=Annotation&feature=fig|6666666.640627.peg.2414&#39; target=_blank>fig|6666666.640627.peg.2414</a>	yes	<a href=&#39;?page=Annotation&feature=fig|6666666.640629.peg.754&#39; target=_blank>fig|6666666.640629.peg.754</a>, <a href=&#39;?page=Annotation&feature=fig|6666666.640629.peg.4222&#39; target=_blank>fig|6666666.640629.peg.4222</a>	yes
A and B	Amino Acids and Derivatives	Lysine, threonine, methionine, and cysteine	Methionine Degradation	Methionine ABC transporter substrate-binding protein	<a href=&#39;?page=Annotation&feature=fig|6666666.640627.peg.469&#39; target=_blank>fig|6666666.640627.peg.469</a>, <a href=&#39;?page=Annotation&feature=fig|6666666.640627.peg.2413&#39; target=_blank>fig|6666666.640627.peg.2413</a>	yes	<a href=&#39;?page=Annotation&feature=fig|6666666.640629.peg.753&#39; target=_blank>fig|6666666.640629.peg.753</a>, <a href=&#39;?page=Annotation&feature=fig|6666666.640629.peg.4223&#39; target=_blank>fig|6666666.640629.peg.4223</a>	yes
A and B	Amino Acids and Derivatives	Lysine, threonine, methionine, and cysteine	Methionine Degradation	Methionine gamma-lyase (EC 4.4.1.11)	<a href=&#39;?page=Annotation&feature=fig|6666666.640627.peg.3671&#39; target=_blank>fig|6666666.640627.peg.3671</a>	yes	<a href=&#39;?page=Annotation&feature=fig|6666666.640629.peg.3828&#39; target=_blank>fig|6666666.640629.peg.3828</a>	yes
A and B	Amino Acids and Derivatives	Lysine, threonine, methionine, and cysteine	Methionine Degradation	S-adenosylhomocysteine nucleosidase (EC 3.2.2.9)	<a href=&#39;?page=Annotation&feature=fig|6666666.640627.peg.1994&#39; target=_blank>fig|6666666.640627.peg.1994</a>	yes	<a href=&#39;?page=Annotation&feature=fig|6666666.640629.peg.236&#39; target=_blank>fig|6666666.640629.peg.236</a>, <a href=&#39;?page=Annotation&feature=fig|6666666.640629.peg.1241&#39; target=_blank>fig|6666666.640629.peg.1241</a>, <a href=&#39;?page=Annotation&feature=fig|6666666.640629.peg.1973&#39; target=_blank>fig|6666666.640629.peg.1973</a>	yes
A and B	Amino Acids and Derivatives	Lysine, threonine, methionine, and cysteine	Methionine Degradation	S-adenosylmethionine synthetase (EC 2.5.1.6)	<a href=&#39;?page=Annotation&feature=fig|6666666.640627.peg.2308&#39; target=_blank>fig|6666666.640627.peg.2308</a>	yes	<a href=&#39;?page=Annotation&feature=fig|6666666.640629.peg.683&#39; target=_blank>fig|6666666.640629.peg.683</a>	yes
A and B	Amino Acids and Derivatives	Lysine, threonine, methionine, and cysteine	Methionine Degradation	S-ribosylhomocysteine lyase (EC 4.4.1.21)	<a href=&#39;?page=Annotation&feature=fig|6666666.640627.peg.136&#39; target=_blank>fig|6666666.640627.peg.136</a>	yes	<a href=&#39;?page=Annotation&feature=fig|6666666.640629.peg.3339&#39; target=_blank>fig|6666666.640629.peg.3339</a>	yes
A and B	Amino Acids and Derivatives	Lysine, threonine, methionine, and cysteine	Threonine and Homoserine Biosynthesis	Aspartate aminotransferase (EC 2.6.1.1)	<a href=&#39;?page=Annotation&feature=fig|6666666.640627.peg.1720&#39; target=_blank>fig|6666666.640627.peg.1720</a>, <a href=&#39;?page=Annotation&feature=fig|6666666.640627.peg.2575&#39; target=_blank>fig|6666666.640627.peg.2575</a>	yes	<a href=&#39;?page=Annotation&feature=fig|6666666.640629.peg.518&#39; target=_blank>fig|6666666.640629.peg.518</a>, <a href=&#39;?page=Annotation&feature=fig|6666666.640629.peg.1220&#39; target=_blank>fig|6666666.640629.peg.1220</a>, <a href=&#39;?page=Annotation&feature=fig|6666666.640629.peg.2473&#39; target=_blank>fig|6666666.640629.peg.2473</a>	yes
A and B	Amino Acids and Derivatives	Lysine, threonine, methionine, and cysteine	Threonine and Homoserine Biosynthesis	Aspartate-semialdehyde dehydrogenase (EC 1.2.1.11)	<a href=&#39;?page=Annotation&feature=fig|6666666.640627.peg.1669&#39; target=_blank>fig|6666666.640627.peg.1669</a>	yes	<a href=&#39;?page=Annotation&feature=fig|6666666.640629.peg.3477&#39; target=_blank>fig|6666666.640629.peg.3477</a>	yes
A and B	Amino Acids and Derivatives	Lysine, threonine, methionine, and cysteine	Threonine and Homoserine Biosynthesis	Aspartokinase (EC 2.7.2.4)	<a href=&#39;?page=Annotation&feature=fig|6666666.640627.peg.1670&#39; target=_blank>fig|6666666.640627.peg.1670</a>, <a href=&#39;?page=Annotation&feature=fig|6666666.640627.peg.1849&#39; target=_blank>fig|6666666.640627.peg.1849</a>, <a href=&#39;?page=Annotation&feature=fig|6666666.640627.peg.4016&#39; target=_blank>fig|6666666.640627.peg.4016</a>	yes	<a href=&#39;?page=Annotation&feature=fig|6666666.640629.peg.385&#39; target=_blank>fig|6666666.640629.peg.385</a>, <a href=&#39;?page=Annotation&feature=fig|6666666.640629.peg.2843&#39; target=_blank>fig|6666666.640629.peg.2843</a>, <a href=&#39;?page=Annotation&feature=fig|6666666.640629.peg.3478&#39; target=_blank>fig|6666666.640629.peg.3478</a>	yes
A and B	Amino Acids and Derivatives	Lysine, threonine, methionine, and cysteine	Threonine and Homoserine Biosynthesis	Homoserine dehydrogenase (EC 1.1.1.3)	<a href=&#39;?page=Annotation&feature=fig|6666666.640627.peg.3461&#39; target=_blank>fig|6666666.640627.peg.3461</a>	yes	<a href=&#39;?page=Annotation&feature=fig|6666666.640629.peg.3119&#39; target=_blank>fig|6666666.640629.peg.3119</a>, <a href=&#39;?page=Annotation&feature=fig|6666666.640629.peg.4324&#39; target=_blank>fig|6666666.640629.peg.4324</a>	yes
A and B	Amino Acids and Derivatives	Lysine, threonine, methionine, and cysteine	Threonine and Homoserine Biosynthesis	Homoserine kinase (EC 2.7.1.39)	<a href=&#39;?page=Annotation&feature=fig|6666666.640627.peg.3459&#39; target=_blank>fig|6666666.640627.peg.3459</a>	yes	<a href=&#39;?page=Annotation&feature=fig|6666666.640629.peg.3117&#39; target=_blank>fig|6666666.640629.peg.3117</a>	yes
A and B	Amino Acids and Derivatives	Lysine, threonine, methionine, and cysteine	Threonine and Homoserine Biosynthesis	Threonine synthase (EC 4.2.3.1)	<a href=&#39;?page=Annotation&feature=fig|6666666.640627.peg.3460&#39; target=_blank>fig|6666666.640627.peg.3460</a>	yes	<a href=&#39;?page=Annotation&feature=fig|6666666.640629.peg.3118&#39; target=_blank>fig|6666666.640629.peg.3118</a>	yes
A and B	Amino Acids and Derivatives	Lysine, threonine, methionine, and cysteine	Threonine degradation	L-threonine 3-dehydrogenase (EC 1.1.1.103)	<a href=&#39;?page=Annotation&feature=fig|6666666.640627.peg.3664&#39; target=_blank>fig|6666666.640627.peg.3664</a>	yes	<a href=&#39;?page=Annotation&feature=fig|6666666.640629.peg.3500&#39; target=_blank>fig|6666666.640629.peg.3500</a>	yes
A and B	Amino Acids and Derivatives	Lysine, threonine, methionine, and cysteine	Threonine degradation	Threonine dehydratase, catabolic (EC 4.3.1.19)	<a href=&#39;?page=Annotation&feature=fig|6666666.640627.peg.388&#39; target=_blank>fig|6666666.640627.peg.388</a>, <a href=&#39;?page=Annotation&feature=fig|6666666.640627.peg.666&#39; target=_blank>fig|6666666.640627.peg.666</a>	yes	<a href=&#39;?page=Annotation&feature=fig|6666666.640629.peg.1541&#39; target=_blank>fig|6666666.640629.peg.1541</a>, <a href=&#39;?page=Annotation&feature=fig|6666666.640629.peg.4310&#39; target=_blank>fig|6666666.640629.peg.4310</a>	yes
A	Amino Acids and Derivatives	Lysine, threonine, methionine, and cysteine	Cysteine Biosynthesis	Sulfate permease, Trk-type	<a href=&#39;?page=Annotation&feature=fig|6666666.640627.peg.4244&#39; target=_blank>fig|6666666.640627.peg.4244</a>	yes	<input type=&#39;button&#39; class=&#39;button&#39; value=&#39;find&#39; onclick=&#39;window.open("?page=SearchGene&fr=Sulfate permease, Trk-type&organism=6666666.640629&subsystem=Cysteine_Biosynthesis&template_gene=fig|6666666.640627.peg.4244");&#39;>	no
A	Amino Acids and Derivatives	Lysine, threonine, methionine, and cysteine	Methionine Biosynthesis	Homoserine O-succinyltransferase (EC 2.3.1.46)	<a href=&#39;?page=Annotation&feature=fig|6666666.640627.peg.2800&#39; target=_blank>fig|6666666.640627.peg.2800</a>	yes	<input type=&#39;button&#39; class=&#39;button&#39; value=&#39;find&#39; onclick=&#39;window.open("?page=SearchGene&fr=Homoserine O-succinyltransferase (EC 2.3.1.46)&organism=6666666.640629&subsystem=Methionine_Biosynthesis&template_gene=fig|6666666.640627.peg.2800");&#39;>	no
A	Amino Acids and Derivatives	Lysine, threonine, methionine, and cysteine	Threonine degradation	Threonine dehydrogenase and related Zn-dependent dehydrogenases	<a href=&#39;?page=Annotation&feature=fig|6666666.640627.peg.3442&#39; target=_blank>fig|6666666.640627.peg.3442</a>	yes	<input type=&#39;button&#39; class=&#39;button&#39; value=&#39;find&#39; onclick=&#39;window.open("?page=SearchGene&fr=Threonine dehydrogenase and related Zn-dependent dehydrogenases&organism=6666666.640629&subsystem=Threonine_degradation&template_gene=fig|6666666.640627.peg.3442");&#39;>	no
B	Amino Acids and Derivatives	Lysine, threonine, methionine, and cysteine	Methionine Biosynthesis	5-methyltetrahydrofolate--homocysteine methyltransferase (EC 2.1.1.13)	<input type=&#39;button&#39; value=&#39;find&#39; onclick=&#39;window.open("?page=SearchGene&fr=5-methyltetrahydrofolate--homocysteine methyltransferase (EC 2.1.1.13)&organism=6666666.640627&subsystem=Methionine_Biosynthesis&template_gene=fig|6666666.640629.peg.3973");&#39;>	no	<a href=&#39;?page=Annotation&feature=fig|6666666.640629.peg.3973&#39; target=_blank>fig|6666666.640629.peg.3973</a>	yes
B	Amino Acids and Derivatives	Lysine, threonine, methionine, and cysteine	Methionine Biosynthesis	Betaine--homocysteine S-methyltransferase (EC 2.1.1.5)	<input type=&#39;button&#39; value=&#39;find&#39; onclick=&#39;window.open("?page=SearchGene&fr=Betaine--homocysteine S-methyltransferase (EC 2.1.1.5)&organism=6666666.640627&subsystem=Methionine_Biosynthesis&template_gene=fig|6666666.640629.peg.535");&#39;>	no	<a href=&#39;?page=Annotation&feature=fig|6666666.640629.peg.535&#39; target=_blank>fig|6666666.640629.peg.535</a>	yes
B	Amino Acids and Derivatives	Lysine, threonine, methionine, and cysteine	Methionine Biosynthesis	Homocysteine S-methyltransferase (EC 2.1.1.10)	<input type=&#39;button&#39; value=&#39;find&#39; onclick=&#39;window.open("?page=SearchGene&fr=Homocysteine S-methyltransferase (EC 2.1.1.10)&organism=6666666.640627&subsystem=Methionine_Biosynthesis&template_gene=fig|6666666.640629.peg.1765");&#39;>	no	<a href=&#39;?page=Annotation&feature=fig|6666666.640629.peg.1765&#39; target=_blank>fig|6666666.640629.peg.1765</a>	yes
B	Amino Acids and Derivatives	Lysine, threonine, methionine, and cysteine	Methionine Biosynthesis	Homoserine O-acetyltransferase (EC 2.3.1.31)	<input type=&#39;button&#39; value=&#39;find&#39; onclick=&#39;window.open("?page=SearchGene&fr=Homoserine O-acetyltransferase (EC 2.3.1.31)&organism=6666666.640627&subsystem=Methionine_Biosynthesis&template_gene=fig|6666666.640629.peg.3842");&#39;>	no	<a href=&#39;?page=Annotation&feature=fig|6666666.640629.peg.3842&#39; target=_blank>fig|6666666.640629.peg.3842</a>	yes
B	Amino Acids and Derivatives	Lysine, threonine, methionine, and cysteine	Methionine Biosynthesis	Methionine transporter MetT	<input type=&#39;button&#39; value=&#39;find&#39; onclick=&#39;window.open("?page=SearchGene&fr=Methionine transporter MetT&organism=6666666.640627&subsystem=Methionine_Biosynthesis&template_gene=fig|6666666.640629.peg.1683");&#39;>	no	<a href=&#39;?page=Annotation&feature=fig|6666666.640629.peg.1683&#39; target=_blank>fig|6666666.640629.peg.1683</a>, <a href=&#39;?page=Annotation&feature=fig|6666666.640629.peg.1684&#39; target=_blank>fig|6666666.640629.peg.1684</a>, <a href=&#39;?page=Annotation&feature=fig|6666666.640629.peg.1698&#39; target=_blank>fig|6666666.640629.peg.1698</a>	yes
B	Amino Acids and Derivatives	Lysine, threonine, methionine, and cysteine	Threonine degradation	low-specificity D-threonine aldolase	<input type=&#39;button&#39; value=&#39;find&#39; onclick=&#39;window.open("?page=SearchGene&fr=low-specificity D-threonine aldolase&organism=6666666.640627&subsystem=Threonine_degradation&template_gene=fig|6666666.640629.peg.2691");&#39;>	no	<a href=&#39;?page=Annotation&feature=fig|6666666.640629.peg.2691&#39; target=_blank>fig|6666666.640629.peg.2691</a>	yes
B	Amino Acids and Derivatives	Polyamines	DAP (1,3-diaminopropane) production	Siderophore biosynthesis L-2,4-diaminobutyrate decarboxylase	<input type=&#39;button&#39; value=&#39;find&#39; onclick=&#39;window.open("?page=SearchGene&fr=Siderophore biosynthesis L-2,4-diaminobutyrate decarboxylase&organism=6666666.640627&subsystem=DAP_(1,3-diaminopropane)_production&template_gene=fig|6666666.640629.peg.2848");&#39;>	no	<a href=&#39;?page=Annotation&feature=fig|6666666.640629.peg.2848&#39; target=_blank>fig|6666666.640629.peg.2848</a>	yes
B	Amino Acids and Derivatives	Polyamines	DAP (1,3-diaminopropane) production	Siderophore biosynthesis diaminobutyrate--2-oxoglutarate aminotransferase (EC 2.6.1.76)	<input type=&#39;button&#39; value=&#39;find&#39; onclick=&#39;window.open("?page=SearchGene&fr=Siderophore biosynthesis diaminobutyrate--2-oxoglutarate aminotransferase (EC 2.6.1.76)&organism=6666666.640627&subsystem=DAP_(1,3-diaminopropane)_production&template_gene=fig|6666666.640629.peg.2849");&#39;>	no	<a href=&#39;?page=Annotation&feature=fig|6666666.640629.peg.2849&#39; target=_blank>fig|6666666.640629.peg.2849</a>	yes
A and B	Amino Acids and Derivatives	Proline and 4-hydroxyproline	Proline, 4-hydroxyproline uptake and utilization	Delta-1-pyrroline-5-carboxylate dehydrogenase (EC 1.2.1.88)	<a href=&#39;?page=Annotation&feature=fig|6666666.640627.peg.346&#39; target=_blank>fig|6666666.640627.peg.346</a>	yes	<a href=&#39;?page=Annotation&feature=fig|6666666.640629.peg.1794&#39; target=_blank>fig|6666666.640629.peg.1794</a>, <a href=&#39;?page=Annotation&feature=fig|6666666.640629.peg.2764&#39; target=_blank>fig|6666666.640629.peg.2764</a>	yes
A and B	Amino Acids and Derivatives	Proline and 4-hydroxyproline	Proline, 4-hydroxyproline uptake and utilization	Proline/sodium symporter PutP (TC 2.A.21.2.1)	<a href=&#39;?page=Annotation&feature=fig|6666666.640627.peg.173&#39; target=_blank>fig|6666666.640627.peg.173</a>, <a href=&#39;?page=Annotation&feature=fig|6666666.640627.peg.3962&#39; target=_blank>fig|6666666.640627.peg.3962</a>	yes	<a href=&#39;?page=Annotation&feature=fig|6666666.640629.peg.1792&#39; target=_blank>fig|6666666.640629.peg.1792</a>, <a href=&#39;?page=Annotation&feature=fig|6666666.640629.peg.2129&#39; target=_blank>fig|6666666.640629.peg.2129</a>	yes
A and B	Amino Acids and Derivatives	Proline and 4-hydroxyproline	Proline Synthesis	Gamma-glutamyl phosphate reductase (EC 1.2.1.41)	<a href=&#39;?page=Annotation&feature=fig|6666666.640627.peg.2993&#39; target=_blank>fig|6666666.640627.peg.2993</a>	yes	<a href=&#39;?page=Annotation&feature=fig|6666666.640629.peg.3199&#39; target=_blank>fig|6666666.640629.peg.3199</a>	yes
A and B	Amino Acids and Derivatives	Proline and 4-hydroxyproline	Proline Synthesis	Glutamate 5-kinase (EC 2.7.2.11)	<a href=&#39;?page=Annotation&feature=fig|6666666.640627.peg.2992&#39; target=_blank>fig|6666666.640627.peg.2992</a>	yes	<a href=&#39;?page=Annotation&feature=fig|6666666.640629.peg.1987&#39; target=_blank>fig|6666666.640629.peg.1987</a>, <a href=&#39;?page=Annotation&feature=fig|6666666.640629.peg.3198&#39; target=_blank>fig|6666666.640629.peg.3198</a>	yes
A and B	Amino Acids and Derivatives	Proline and 4-hydroxyproline	Proline Synthesis	Pyrroline-5-carboxylate reductase (EC 1.5.1.2)	<a href=&#39;?page=Annotation&feature=fig|6666666.640627.peg.466&#39; target=_blank>fig|6666666.640627.peg.466</a>	yes	<a href=&#39;?page=Annotation&feature=fig|6666666.640629.peg.1295&#39; target=_blank>fig|6666666.640629.peg.1295</a>, <a href=&#39;?page=Annotation&feature=fig|6666666.640629.peg.3197&#39; target=_blank>fig|6666666.640629.peg.3197</a>	yes
A and B	Amino Acids and Derivatives	Proline and 4-hydroxyproline	Proline Synthesis	RNA-binding C-terminal domain PUA	<a href=&#39;?page=Annotation&feature=fig|6666666.640627.peg.2992&#39; target=_blank>fig|6666666.640627.peg.2992</a>	yes	<a href=&#39;?page=Annotation&feature=fig|6666666.640629.peg.1987&#39; target=_blank>fig|6666666.640629.peg.1987</a>, <a href=&#39;?page=Annotation&feature=fig|6666666.640629.peg.3198&#39; target=_blank>fig|6666666.640629.peg.3198</a>	yes
A	Amino Acids and Derivatives	Proline and 4-hydroxyproline	Proline, 4-hydroxyproline uptake and utilization	D-amino-acid oxidase (EC 1.4.3.3)	<a href=&#39;?page=Annotation&feature=fig|6666666.640627.peg.281&#39; target=_blank>fig|6666666.640627.peg.281</a>	yes	<input type=&#39;button&#39; class=&#39;button&#39; value=&#39;find&#39; onclick=&#39;window.open("?page=SearchGene&fr=D-amino-acid oxidase (EC 1.4.3.3)&organism=6666666.640629&subsystem=Proline,_4-hydroxyproline_uptake_and_utilization&template_gene=fig|6666666.640627.peg.281");&#39;>	no
B	Amino Acids and Derivatives	Proline and 4-hydroxyproline	Proline, 4-hydroxyproline uptake and utilization	Similar to eukaryotic Peptidyl prolyl 4-hydroxylase, alpha subunit (EC 1.14.11.2)	<input type=&#39;button&#39; value=&#39;find&#39; onclick=&#39;window.open("?page=SearchGene&fr=Similar to eukaryotic Peptidyl prolyl 4-hydroxylase, alpha subunit (EC 1.14.11.2)&organism=6666666.640627&subsystem=Proline,_4-hydroxyproline_uptake_and_utilization&template_gene=fig|6666666.640629.peg.1908");&#39;>	no	<a href=&#39;?page=Annotation&feature=fig|6666666.640629.peg.1908&#39; target=_blank>fig|6666666.640629.peg.1908</a>	yes
A	Amino Acids and Derivatives	no subcategory	Creatine and Creatinine Degradation	Creatinine amidohydrolase (EC 3.5.2.10)	<a href=&#39;?page=Annotation&feature=fig|6666666.640627.peg.2914&#39; target=_blank>fig|6666666.640627.peg.2914</a>	yes	<input type=&#39;button&#39; class=&#39;button&#39; value=&#39;find&#39; onclick=&#39;window.open("?page=SearchGene&fr=Creatinine amidohydrolase (EC 3.5.2.10)&organism=6666666.640629&subsystem=Creatine_and_Creatinine_Degradation&template_gene=fig|6666666.640627.peg.2914");&#39;>	no
A	Amino Acids and Derivatives	no subcategory	Creatine and Creatinine Degradation	Cytosine deaminase (EC 3.5.4.1)	<a href=&#39;?page=Annotation&feature=fig|6666666.640627.peg.3051&#39; target=_blank>fig|6666666.640627.peg.3051</a>, <a href=&#39;?page=Annotation&feature=fig|6666666.640627.peg.3052&#39; target=_blank>fig|6666666.640627.peg.3052</a>, <a href=&#39;?page=Annotation&feature=fig|6666666.640627.peg.3455&#39; target=_blank>fig|6666666.640627.peg.3455</a>	yes	<input type=&#39;button&#39; class=&#39;button&#39; value=&#39;find&#39; onclick=&#39;window.open("?page=SearchGene&fr=Cytosine deaminase (EC 3.5.4.1)&organism=6666666.640629&subsystem=Creatine_and_Creatinine_Degradation&template_gene=fig|6666666.640627.peg.3051");&#39;>	no
A	Amino Acids and Derivatives	no subcategory	Creatine and Creatinine Degradation	Cytosine permease	<a href=&#39;?page=Annotation&feature=fig|6666666.640627.peg.3456&#39; target=_blank>fig|6666666.640627.peg.3456</a>	yes	<input type=&#39;button&#39; class=&#39;button&#39; value=&#39;find&#39; onclick=&#39;window.open("?page=SearchGene&fr=Cytosine permease&organism=6666666.640629&subsystem=Creatine_and_Creatinine_Degradation&template_gene=fig|6666666.640627.peg.3456");&#39;>	no
A	Amino Acids and Derivatives	no subcategory	Creatine and Creatinine Degradation	N-methylhydantoinase A (EC 3.5.2.14)	<a href=&#39;?page=Annotation&feature=fig|6666666.640627.peg.4213&#39; target=_blank>fig|6666666.640627.peg.4213</a>	yes	<input type=&#39;button&#39; class=&#39;button&#39; value=&#39;find&#39; onclick=&#39;window.open("?page=SearchGene&fr=N-methylhydantoinase A (EC 3.5.2.14)&organism=6666666.640629&subsystem=Creatine_and_Creatinine_Degradation&template_gene=fig|6666666.640627.peg.4213");&#39;>	no
A	Amino Acids and Derivatives	no subcategory	Creatine and Creatinine Degradation	N-methylhydantoinase B (EC 3.5.2.14)	<a href=&#39;?page=Annotation&feature=fig|6666666.640627.peg.4214&#39; target=_blank>fig|6666666.640627.peg.4214</a>	yes	<input type=&#39;button&#39; class=&#39;button&#39; value=&#39;find&#39; onclick=&#39;window.open("?page=SearchGene&fr=N-methylhydantoinase B (EC 3.5.2.14)&organism=6666666.640629&subsystem=Creatine_and_Creatinine_Degradation&template_gene=fig|6666666.640627.peg.4214");&#39;>	no
A and B	Carbohydrates	Aminosugars	Chitin and N-acetylglucosamine utilization	Glucosamine-6-phosphate deaminase (EC 3.5.99.6)	<a href=&#39;?page=Annotation&feature=fig|6666666.640627.peg.2949&#39; target=_blank>fig|6666666.640627.peg.2949</a>	yes	<a href=&#39;?page=Annotation&feature=fig|6666666.640629.peg.2831&#39; target=_blank>fig|6666666.640629.peg.2831</a>	yes
A and B	Carbohydrates	Aminosugars	Chitin and N-acetylglucosamine utilization	N-acetylglucosamine-6-phosphate deacetylase (EC 3.5.1.25)	<a href=&#39;?page=Annotation&feature=fig|6666666.640627.peg.2950&#39; target=_blank>fig|6666666.640627.peg.2950</a>, <a href=&#39;?page=Annotation&feature=fig|6666666.640627.peg.3277&#39; target=_blank>fig|6666666.640627.peg.3277</a>	yes	<a href=&#39;?page=Annotation&feature=fig|6666666.640629.peg.2832&#39; target=_blank>fig|6666666.640629.peg.2832</a>	yes
A and B	Carbohydrates	Aminosugars	Chitin and N-acetylglucosamine utilization	Predicted transcriptional regulator of N-Acetylglucosamine utilization, GntR family	<a href=&#39;?page=Annotation&feature=fig|6666666.640627.peg.3021&#39; target=_blank>fig|6666666.640627.peg.3021</a>, <a href=&#39;?page=Annotation&feature=fig|6666666.640627.peg.3271&#39; target=_blank>fig|6666666.640627.peg.3271</a>	yes	<a href=&#39;?page=Annotation&feature=fig|6666666.640629.peg.2830&#39; target=_blank>fig|6666666.640629.peg.2830</a>	yes
A	Carbohydrates	Aminosugars	Chitin and N-acetylglucosamine utilization	Chitin binding protein	<a href=&#39;?page=Annotation&feature=fig|6666666.640627.peg.3014&#39; target=_blank>fig|6666666.640627.peg.3014</a>	yes	<input type=&#39;button&#39; class=&#39;button&#39; value=&#39;find&#39; onclick=&#39;window.open("?page=SearchGene&fr=Chitin binding protein&organism=6666666.640629&subsystem=Chitin_and_N-acetylglucosamine_utilization&template_gene=fig|6666666.640627.peg.3014");&#39;>	no
A	Carbohydrates	Aminosugars	Chitin and N-acetylglucosamine utilization	Chitinase (EC 3.2.1.14)	<a href=&#39;?page=Annotation&feature=fig|6666666.640627.peg.4444&#39; target=_blank>fig|6666666.640627.peg.4444</a>	yes	<input type=&#39;button&#39; class=&#39;button&#39; value=&#39;find&#39; onclick=&#39;window.open("?page=SearchGene&fr=Chitinase (EC 3.2.1.14)&organism=6666666.640629&subsystem=Chitin_and_N-acetylglucosamine_utilization&template_gene=fig|6666666.640627.peg.4444");&#39;>	no
A	Carbohydrates	Aminosugars	Chitin and N-acetylglucosamine utilization	N-acetylglucosamine-6P-responsive transcriptional repressor NagC, ROK family	<a href=&#39;?page=Annotation&feature=fig|6666666.640627.peg.108&#39; target=_blank>fig|6666666.640627.peg.108</a>	yes	<input type=&#39;button&#39; class=&#39;button&#39; value=&#39;find&#39; onclick=&#39;window.open("?page=SearchGene&fr=N-acetylglucosamine-6P-responsive transcriptional repressor NagC, ROK family&organism=6666666.640629&subsystem=Chitin_and_N-acetylglucosamine_utilization&template_gene=fig|6666666.640627.peg.108");&#39;>	no
A	Carbohydrates	Aminosugars	Neotrehalosadiamine (NTD) Biosynthesis Operon	NTD biosynthesis operon protein NtdA	<a href=&#39;?page=Annotation&feature=fig|6666666.640627.peg.3349&#39; target=_blank>fig|6666666.640627.peg.3349</a>	yes	<input type=&#39;button&#39; class=&#39;button&#39; value=&#39;find&#39; onclick=&#39;window.open("?page=SearchGene&fr=NTD biosynthesis operon protein NtdA&organism=6666666.640629&subsystem=Neotrehalosadiamine_(NTD)_Biosynthesis_Operon&template_gene=fig|6666666.640627.peg.3349");&#39;>	no
A	Carbohydrates	Aminosugars	Neotrehalosadiamine (NTD) Biosynthesis Operon	NTD biosynthesis operon putative hydrolase NtdB (EC 3.-.-.-)	<a href=&#39;?page=Annotation&feature=fig|6666666.640627.peg.3350&#39; target=_blank>fig|6666666.640627.peg.3350</a>	yes	<input type=&#39;button&#39; class=&#39;button&#39; value=&#39;find&#39; onclick=&#39;window.open("?page=SearchGene&fr=NTD biosynthesis operon putative hydrolase NtdB (EC 3.-.-.-)&organism=6666666.640629&subsystem=Neotrehalosadiamine_(NTD)_Biosynthesis_Operon&template_gene=fig|6666666.640627.peg.3350");&#39;>	no
A	Carbohydrates	Aminosugars	Neotrehalosadiamine (NTD) Biosynthesis Operon	NTD biosynthesis operon putative oxidoreductase NtdC (EC 1.-.-.-)	<a href=&#39;?page=Annotation&feature=fig|6666666.640627.peg.3351&#39; target=_blank>fig|6666666.640627.peg.3351</a>	yes	<input type=&#39;button&#39; class=&#39;button&#39; value=&#39;find&#39; onclick=&#39;window.open("?page=SearchGene&fr=NTD biosynthesis operon putative oxidoreductase NtdC (EC 1.-.-.-)&organism=6666666.640629&subsystem=Neotrehalosadiamine_(NTD)_Biosynthesis_Operon&template_gene=fig|6666666.640627.peg.3351");&#39;>	no
A	Carbohydrates	Aminosugars	Neotrehalosadiamine (NTD) Biosynthesis Operon	NTD biosynthesis operon regulator NtdR	<a href=&#39;?page=Annotation&feature=fig|6666666.640627.peg.3347&#39; target=_blank>fig|6666666.640627.peg.3347</a>, <a href=&#39;?page=Annotation&feature=fig|6666666.640627.peg.3348&#39; target=_blank>fig|6666666.640627.peg.3348</a>	yes	<input type=&#39;button&#39; class=&#39;button&#39; value=&#39;find&#39; onclick=&#39;window.open("?page=SearchGene&fr=NTD biosynthesis operon regulator NtdR&organism=6666666.640629&subsystem=Neotrehalosadiamine_(NTD)_Biosynthesis_Operon&template_gene=fig|6666666.640627.peg.3347");&#39;>	no
B	Carbohydrates	Aminosugars	Chitin and N-acetylglucosamine utilization	N-Acetyl-D-glucosamine ABC transport system, permease protein 2	<input type=&#39;button&#39; value=&#39;find&#39; onclick=&#39;window.open("?page=SearchGene&fr=N-Acetyl-D-glucosamine ABC transport system, permease protein 2&organism=6666666.640627&subsystem=Chitin_and_N-acetylglucosamine_utilization&template_gene=fig|6666666.640629.peg.655");&#39;>	no	<a href=&#39;?page=Annotation&feature=fig|6666666.640629.peg.655&#39; target=_blank>fig|6666666.640629.peg.655</a>	yes
B	Carbohydrates	Aminosugars	Chitin and N-acetylglucosamine utilization	N-Acetyl-D-glucosamine ABC transport system, sugar-binding protein	<input type=&#39;button&#39; value=&#39;find&#39; onclick=&#39;window.open("?page=SearchGene&fr=N-Acetyl-D-glucosamine ABC transport system, sugar-binding protein&organism=6666666.640627&subsystem=Chitin_and_N-acetylglucosamine_utilization&template_gene=fig|6666666.640629.peg.1021");&#39;>	no	<a href=&#39;?page=Annotation&feature=fig|6666666.640629.peg.1021&#39; target=_blank>fig|6666666.640629.peg.1021</a>, <a href=&#39;?page=Annotation&feature=fig|6666666.640629.peg.1125&#39; target=_blank>fig|6666666.640629.peg.1125</a>	yes
A and B	Carbohydrates	Central carbohydrate metabolism	Dehydrogenase complexes	2-oxoglutarate dehydrogenase E1 component (EC 1.2.4.2)	<a href=&#39;?page=Annotation&feature=fig|6666666.640627.peg.4202&#39; target=_blank>fig|6666666.640627.peg.4202</a>	yes	<a href=&#39;?page=Annotation&feature=fig|6666666.640629.peg.1291&#39; target=_blank>fig|6666666.640629.peg.1291</a>	yes
A and B	Carbohydrates	Central carbohydrate metabolism	Dehydrogenase complexes	Branched-chain alpha-keto acid dehydrogenase, E1 component, alpha subunit (EC 1.2.4.4)	<a href=&#39;?page=Annotation&feature=fig|6666666.640627.peg.623&#39; target=_blank>fig|6666666.640627.peg.623</a>, <a href=&#39;?page=Annotation&feature=fig|6666666.640627.peg.1842&#39; target=_blank>fig|6666666.640627.peg.1842</a>	yes	<a href=&#39;?page=Annotation&feature=fig|6666666.640629.peg.394&#39; target=_blank>fig|6666666.640629.peg.394</a>	yes
A and B	Carbohydrates	Central carbohydrate metabolism	Dehydrogenase complexes	Branched-chain alpha-keto acid dehydrogenase, E1 component, beta subunit (EC 1.2.4.4)	<a href=&#39;?page=Annotation&feature=fig|6666666.640627.peg.624&#39; target=_blank>fig|6666666.640627.peg.624</a>, <a href=&#39;?page=Annotation&feature=fig|6666666.640627.peg.1841&#39; target=_blank>fig|6666666.640627.peg.1841</a>	yes	<a href=&#39;?page=Annotation&feature=fig|6666666.640629.peg.395&#39; target=_blank>fig|6666666.640629.peg.395</a>	yes
A and B	Carbohydrates	Central carbohydrate metabolism	Dehydrogenase complexes	Cytosol aminopeptidase PepA (EC 3.4.11.1)	<a href=&#39;?page=Annotation&feature=fig|6666666.640627.peg.3158&#39; target=_blank>fig|6666666.640627.peg.3158</a>	yes	<a href=&#39;?page=Annotation&feature=fig|6666666.640629.peg.719&#39; target=_blank>fig|6666666.640629.peg.719</a>	yes
A and B	Carbohydrates	Central carbohydrate metabolism	Dehydrogenase complexes	Dihydrolipoamide acetyltransferase component of pyruvate dehydrogenase complex (EC 2.3.1.12)	<a href=&#39;?page=Annotation&feature=fig|6666666.640627.peg.625&#39; target=_blank>fig|6666666.640627.peg.625</a>, <a href=&#39;?page=Annotation&feature=fig|6666666.640627.peg.1463&#39; target=_blank>fig|6666666.640627.peg.1463</a>	yes	<a href=&#39;?page=Annotation&feature=fig|6666666.640629.peg.2252&#39; target=_blank>fig|6666666.640629.peg.2252</a>	yes
A and B	Carbohydrates	Central carbohydrate metabolism	Dehydrogenase complexes	Dihydrolipoamide acyltransferase component of branched-chain alpha-keto acid dehydrogenase complex (EC 2.3.1.168)	<a href=&#39;?page=Annotation&feature=fig|6666666.640627.peg.1840&#39; target=_blank>fig|6666666.640627.peg.1840</a>	yes	<a href=&#39;?page=Annotation&feature=fig|6666666.640629.peg.396&#39; target=_blank>fig|6666666.640629.peg.396</a>	yes
A and B	Carbohydrates	Central carbohydrate metabolism	Dehydrogenase complexes	Dihydrolipoamide dehydrogenase of branched-chain alpha-keto acid dehydrogenase (EC 1.8.1.4)	<a href=&#39;?page=Annotation&feature=fig|6666666.640627.peg.1843&#39; target=_blank>fig|6666666.640627.peg.1843</a>	yes	<a href=&#39;?page=Annotation&feature=fig|6666666.640629.peg.393&#39; target=_blank>fig|6666666.640629.peg.393</a>	yes
A and B	Carbohydrates	Central carbohydrate metabolism	Dehydrogenase complexes	Dihydrolipoamide succinyltransferase component (E2) of 2-oxoglutarate dehydrogenase complex (EC 2.3.1.61)	<a href=&#39;?page=Annotation&feature=fig|6666666.640627.peg.4203&#39; target=_blank>fig|6666666.640627.peg.4203</a>	yes	<a href=&#39;?page=Annotation&feature=fig|6666666.640629.peg.1292&#39; target=_blank>fig|6666666.640629.peg.1292</a>	yes
A and B	Carbohydrates	Central carbohydrate metabolism	Dehydrogenase complexes	Pyruvate dehydrogenase E1 component alpha subunit (EC 1.2.4.1)	<a href=&#39;?page=Annotation&feature=fig|6666666.640627.peg.1461&#39; target=_blank>fig|6666666.640627.peg.1461</a>	yes	<a href=&#39;?page=Annotation&feature=fig|6666666.640629.peg.2250&#39; target=_blank>fig|6666666.640629.peg.2250</a>	yes
A and B	Carbohydrates	Central carbohydrate metabolism	Dehydrogenase complexes	Pyruvate dehydrogenase E1 component beta subunit (EC 1.2.4.1)	<a href=&#39;?page=Annotation&feature=fig|6666666.640627.peg.1462&#39; target=_blank>fig|6666666.640627.peg.1462</a>	yes	<a href=&#39;?page=Annotation&feature=fig|6666666.640629.peg.2251&#39; target=_blank>fig|6666666.640629.peg.2251</a>	yes
A and B	Carbohydrates	Central carbohydrate metabolism	Glycolate, glyoxylate interconversions	Glyoxylate reductase (EC 1.1.1.26)	<a href=&#39;?page=Annotation&feature=fig|6666666.640627.peg.2351&#39; target=_blank>fig|6666666.640627.peg.2351</a>	yes	<a href=&#39;?page=Annotation&feature=fig|6666666.640629.peg.730&#39; target=_blank>fig|6666666.640629.peg.730</a>, <a href=&#39;?page=Annotation&feature=fig|6666666.640629.peg.1035&#39; target=_blank>fig|6666666.640629.peg.1035</a>	yes
A and B	Carbohydrates	Central carbohydrate metabolism	Glycolate, glyoxylate interconversions	Glyoxylate reductase (EC 1.1.1.79)	<a href=&#39;?page=Annotation&feature=fig|6666666.640627.peg.2351&#39; target=_blank>fig|6666666.640627.peg.2351</a>	yes	<a href=&#39;?page=Annotation&feature=fig|6666666.640629.peg.730&#39; target=_blank>fig|6666666.640629.peg.730</a>, <a href=&#39;?page=Annotation&feature=fig|6666666.640629.peg.1035&#39; target=_blank>fig|6666666.640629.peg.1035</a>	yes
A and B	Carbohydrates	Central carbohydrate metabolism	Glycolate, glyoxylate interconversions	Hydroxypyruvate reductase (EC 1.1.1.81)	<a href=&#39;?page=Annotation&feature=fig|6666666.640627.peg.2351&#39; target=_blank>fig|6666666.640627.peg.2351</a>	yes	<a href=&#39;?page=Annotation&feature=fig|6666666.640629.peg.730&#39; target=_blank>fig|6666666.640629.peg.730</a>, <a href=&#39;?page=Annotation&feature=fig|6666666.640629.peg.1035&#39; target=_blank>fig|6666666.640629.peg.1035</a>	yes
A and B	Carbohydrates	Central carbohydrate metabolism	Glyoxylate bypass	Aconitate hydratase (EC 4.2.1.3)	<a href=&#39;?page=Annotation&feature=fig|6666666.640627.peg.4083&#39; target=_blank>fig|6666666.640627.peg.4083</a>, <a href=&#39;?page=Annotation&feature=fig|6666666.640627.peg.4389&#39; target=_blank>fig|6666666.640627.peg.4389</a>	yes	<a href=&#39;?page=Annotation&feature=fig|6666666.640629.peg.3528&#39; target=_blank>fig|6666666.640629.peg.3528</a>, <a href=&#39;?page=Annotation&feature=fig|6666666.640629.peg.3867&#39; target=_blank>fig|6666666.640629.peg.3867</a>	yes
A and B	Carbohydrates	Central carbohydrate metabolism	Glyoxylate bypass	Citrate synthase (si) (EC 2.3.3.1)	<a href=&#39;?page=Annotation&feature=fig|6666666.640627.peg.2212&#39; target=_blank>fig|6666666.640627.peg.2212</a>, <a href=&#39;?page=Annotation&feature=fig|6666666.640627.peg.3469&#39; target=_blank>fig|6666666.640627.peg.3469</a>	yes	<a href=&#39;?page=Annotation&feature=fig|6666666.640629.peg.83&#39; target=_blank>fig|6666666.640629.peg.83</a>	yes
A and B	Carbohydrates	Central carbohydrate metabolism	Glyoxylate bypass	Isocitrate lyase (EC 4.1.3.1)	<a href=&#39;?page=Annotation&feature=fig|6666666.640627.peg.582&#39; target=_blank>fig|6666666.640627.peg.582</a>	yes	<a href=&#39;?page=Annotation&feature=fig|6666666.640629.peg.786&#39; target=_blank>fig|6666666.640629.peg.786</a>	yes
A and B	Carbohydrates	Central carbohydrate metabolism	Glyoxylate bypass	Malate dehydrogenase (EC 1.1.1.37)	<a href=&#39;?page=Annotation&feature=fig|6666666.640627.peg.2210&#39; target=_blank>fig|6666666.640627.peg.2210</a>	yes	<a href=&#39;?page=Annotation&feature=fig|6666666.640629.peg.85&#39; target=_blank>fig|6666666.640629.peg.85</a>	yes
A and B	Carbohydrates	Central carbohydrate metabolism	Glyoxylate bypass	Malate synthase G (EC 2.3.3.9)	<a href=&#39;?page=Annotation&feature=fig|6666666.640627.peg.549&#39; target=_blank>fig|6666666.640627.peg.549</a>	yes	<a href=&#39;?page=Annotation&feature=fig|6666666.640629.peg.1864&#39; target=_blank>fig|6666666.640629.peg.1864</a>	yes
A and B	Carbohydrates	Central carbohydrate metabolism	Methylglyoxal Metabolism	Aldehyde dehydrogenase (EC 1.2.1.3)	<a href=&#39;?page=Annotation&feature=fig|6666666.640627.peg.1832&#39; target=_blank>fig|6666666.640627.peg.1832</a>, <a href=&#39;?page=Annotation&feature=fig|6666666.640627.peg.1832&#39; target=_blank>fig|6666666.640627.peg.1832</a>, <a href=&#39;?page=Annotation&feature=fig|6666666.640627.peg.2961&#39; target=_blank>fig|6666666.640627.peg.2961</a>, <a href=&#39;?page=Annotation&feature=fig|666…	yes	<a href=&#39;?page=Annotation&feature=fig|6666666.640629.peg.412&#39; target=_blank>fig|6666666.640629.peg.412</a>, <a href=&#39;?page=Annotation&feature=fig|6666666.640629.peg.412&#39; target=_blank>fig|6666666.640629.peg.412</a>, <a href=&#39;?page=Annotation&feature=fig|6666666.640629.peg.699&#39; target=_blank>fig|6666666.640629.peg.699</a>, <a href=&#39;?page=Annotation&feature=fig|6666666.6…	yes
A and B	Carbohydrates	Central carbohydrate metabolism	Methylglyoxal Metabolism	Aldehyde dehydrogenase B (EC 1.2.1.22)	<a href=&#39;?page=Annotation&feature=fig|6666666.640627.peg.4057&#39; target=_blank>fig|6666666.640627.peg.4057</a>	yes	<a href=&#39;?page=Annotation&feature=fig|6666666.640629.peg.520&#39; target=_blank>fig|6666666.640629.peg.520</a>	yes
A and B	Carbohydrates	Central carbohydrate metabolism	Methylglyoxal Metabolism	Methylglyoxal synthase (EC 4.2.3.3)	<a href=&#39;?page=Annotation&feature=fig|6666666.640627.peg.1727&#39; target=_blank>fig|6666666.640627.peg.1727</a>	yes	<a href=&#39;?page=Annotation&feature=fig|6666666.640629.peg.2483&#39; target=_blank>fig|6666666.640629.peg.2483</a>	yes
A and B	Carbohydrates	Central carbohydrate metabolism	Pentose phosphate pathway	6-phosphogluconate dehydrogenase, decarboxylating (EC 1.1.1.44)	<a href=&#39;?page=Annotation&feature=fig|6666666.640627.peg.2578&#39; target=_blank>fig|6666666.640627.peg.2578</a>	yes	<a href=&#39;?page=Annotation&feature=fig|6666666.640629.peg.1005&#39; target=_blank>fig|6666666.640629.peg.1005</a>	yes
A and B	Carbohydrates	Central carbohydrate metabolism	Pentose phosphate pathway	6-phosphogluconolactonase (EC 3.1.1.31)	<a href=&#39;?page=Annotation&feature=fig|6666666.640627.peg.2906&#39; target=_blank>fig|6666666.640627.peg.2906</a>, <a href=&#39;?page=Annotation&feature=fig|6666666.640627.peg.3016&#39; target=_blank>fig|6666666.640627.peg.3016</a>	yes	<a href=&#39;?page=Annotation&feature=fig|6666666.640629.peg.1007&#39; target=_blank>fig|6666666.640629.peg.1007</a>	yes
A and B	Carbohydrates	Central carbohydrate metabolism	Pentose phosphate pathway	Glucose-6-phosphate 1-dehydrogenase (EC 1.1.1.49)	<a href=&#39;?page=Annotation&feature=fig|6666666.640627.peg.2593&#39; target=_blank>fig|6666666.640627.peg.2593</a>	yes	<a href=&#39;?page=Annotation&feature=fig|6666666.640629.peg.1006&#39; target=_blank>fig|6666666.640629.peg.1006</a>	yes
A and B	Carbohydrates	Central carbohydrate metabolism	Pentose phosphate pathway	Ribose-phosphate pyrophosphokinase (EC 2.7.6.1)	<a href=&#39;?page=Annotation&feature=fig|6666666.640627.peg.769&#39; target=_blank>fig|6666666.640627.peg.769</a>	yes	<a href=&#39;?page=Annotation&feature=fig|6666666.640629.peg.464&#39; target=_blank>fig|6666666.640629.peg.464</a>, <a href=&#39;?page=Annotation&feature=fig|6666666.640629.peg.4280&#39; target=_blank>fig|6666666.640629.peg.4280</a>	yes
A and B	Carbohydrates	Central carbohydrate metabolism	Pentose phosphate pathway	Ribulose-phosphate 3-epimerase (EC 5.1.3.1)	<a href=&#39;?page=Annotation&feature=fig|6666666.640627.peg.1566&#39; target=_blank>fig|6666666.640627.peg.1566</a>	yes	<a href=&#39;?page=Annotation&feature=fig|6666666.640629.peg.2368&#39; target=_blank>fig|6666666.640629.peg.2368</a>, <a href=&#39;?page=Annotation&feature=fig|6666666.640629.peg.3651&#39; target=_blank>fig|6666666.640629.peg.3651</a>	yes
A and B	Carbohydrates	Central carbohydrate metabolism	Pentose phosphate pathway	Transaldolase (EC 2.2.1.2)	<a href=&#39;?page=Annotation&feature=fig|6666666.640627.peg.2646&#39; target=_blank>fig|6666666.640627.peg.2646</a>	yes	<a href=&#39;?page=Annotation&feature=fig|6666666.640629.peg.1174&#39; target=_blank>fig|6666666.640629.peg.1174</a>, <a href=&#39;?page=Annotation&feature=fig|6666666.640629.peg.3004&#39; target=_blank>fig|6666666.640629.peg.3004</a>	yes
A and B	Carbohydrates	Central carbohydrate metabolism	Pentose phosphate pathway	Transketolase (EC 2.2.1.1)	<a href=&#39;?page=Annotation&feature=fig|6666666.640627.peg.4379&#39; target=_blank>fig|6666666.640627.peg.4379</a>	yes	<a href=&#39;?page=Annotation&feature=fig|6666666.640629.peg.1172&#39; target=_blank>fig|6666666.640629.peg.1172</a>, <a href=&#39;?page=Annotation&feature=fig|6666666.640629.peg.1173&#39; target=_blank>fig|6666666.640629.peg.1173</a>, <a href=&#39;?page=Annotation&feature=fig|6666666.640629.peg.3520&#39; target=_blank>fig|6666666.640629.peg.3520</a>	yes
A and B	Carbohydrates	Central carbohydrate metabolism	Pyruvate Alanine Serine Interconversions	Alanine dehydrogenase (EC 1.4.1.1)	<a href=&#39;?page=Annotation&feature=fig|6666666.640627.peg.2234&#39; target=_blank>fig|6666666.640627.peg.2234</a>, <a href=&#39;?page=Annotation&feature=fig|6666666.640627.peg.3366&#39; target=_blank>fig|6666666.640627.peg.3366</a>	yes	<a href=&#39;?page=Annotation&feature=fig|6666666.640629.peg.59&#39; target=_blank>fig|6666666.640629.peg.59</a>, <a href=&#39;?page=Annotation&feature=fig|6666666.640629.peg.1520&#39; target=_blank>fig|6666666.640629.peg.1520</a>, <a href=&#39;?page=Annotation&feature=fig|6666666.640629.peg.2835&#39; target=_blank>fig|6666666.640629.peg.2835</a>	yes
A and B	Carbohydrates	Central carbohydrate metabolism	Pyruvate Alanine Serine Interconversions	Alanine racemase (EC 5.1.1.1)	<a href=&#39;?page=Annotation&feature=fig|6666666.640627.peg.402&#39; target=_blank>fig|6666666.640627.peg.402</a>, <a href=&#39;?page=Annotation&feature=fig|6666666.640627.peg.970&#39; target=_blank>fig|6666666.640627.peg.970</a>, <a href=&#39;?page=Annotation&feature=fig|6666666.640627.peg.3367&#39; target=_blank>fig|6666666.640627.peg.3367</a>	yes	<a href=&#39;?page=Annotation&feature=fig|6666666.640629.peg.2834&#39; target=_blank>fig|6666666.640629.peg.2834</a>, <a href=&#39;?page=Annotation&feature=fig|6666666.640629.peg.3692&#39; target=_blank>fig|6666666.640629.peg.3692</a>	yes
A and B	Carbohydrates	Central carbohydrate metabolism	Pyruvate Alanine Serine Interconversions	Branched-chain amino acid aminotransferase (EC 2.6.1.42)	<a href=&#39;?page=Annotation&feature=fig|6666666.640627.peg.3759&#39; target=_blank>fig|6666666.640627.peg.3759</a>	yes	<a href=&#39;?page=Annotation&feature=fig|6666666.640629.peg.1533&#39; target=_blank>fig|6666666.640629.peg.1533</a>, <a href=&#39;?page=Annotation&feature=fig|6666666.640629.peg.2775&#39; target=_blank>fig|6666666.640629.peg.2775</a>	yes
A and B	Carbohydrates	Central carbohydrate metabolism	Pyruvate Alanine Serine Interconversions	D-alanine aminotransferase (EC 2.6.1.21)	<a href=&#39;?page=Annotation&feature=fig|6666666.640627.peg.401&#39; target=_blank>fig|6666666.640627.peg.401</a>, <a href=&#39;?page=Annotation&feature=fig|6666666.640627.peg.4182&#39; target=_blank>fig|6666666.640627.peg.4182</a>	yes	<a href=&#39;?page=Annotation&feature=fig|6666666.640629.peg.1331&#39; target=_blank>fig|6666666.640629.peg.1331</a>	yes
A and B	Carbohydrates	Central carbohydrate metabolism	Pyruvate Alanine Serine Interconversions	L-serine dehydratase, alpha subunit (EC 4.3.1.17)	<a href=&#39;?page=Annotation&feature=fig|6666666.640627.peg.1573&#39; target=_blank>fig|6666666.640627.peg.1573</a>	yes	<a href=&#39;?page=Annotation&feature=fig|6666666.640629.peg.2389&#39; target=_blank>fig|6666666.640629.peg.2389</a>	yes
A and B	Carbohydrates	Central carbohydrate metabolism	Pyruvate Alanine Serine Interconversions	L-serine dehydratase, beta subunit (EC 4.3.1.17)	<a href=&#39;?page=Annotation&feature=fig|6666666.640627.peg.1572&#39; target=_blank>fig|6666666.640627.peg.1572</a>	yes	<a href=&#39;?page=Annotation&feature=fig|6666666.640629.peg.2388&#39; target=_blank>fig|6666666.640629.peg.2388</a>	yes
A and B	Carbohydrates	Central carbohydrate metabolism	Pyruvate metabolism I: anaplerotic reactions, PEP	NADP-dependent malic enzyme (EC 1.1.1.40)	<a href=&#39;?page=Annotation&feature=fig|6666666.640627.peg.2220&#39; target=_blank>fig|6666666.640627.peg.2220</a>	yes	<a href=&#39;?page=Annotation&feature=fig|6666666.640629.peg.74&#39; target=_blank>fig|6666666.640629.peg.74</a>, <a href=&#39;?page=Annotation&feature=fig|6666666.640629.peg.1876&#39; target=_blank>fig|6666666.640629.peg.1876</a>, <a href=&#39;?page=Annotation&feature=fig|6666666.640629.peg.2664&#39; target=_blank>fig|6666666.640629.peg.2664</a>, <a href=&#39;?page=Annotation&feature=fig|6666666…	yes
A and B	Carbohydrates	Central carbohydrate metabolism	Pyruvate metabolism I: anaplerotic reactions, PEP	Phosphoenolpyruvate carboxykinase [ATP] (EC 4.1.1.49)	<a href=&#39;?page=Annotation&feature=fig|6666666.640627.peg.2309&#39; target=_blank>fig|6666666.640627.peg.2309</a>	yes	<a href=&#39;?page=Annotation&feature=fig|6666666.640629.peg.684&#39; target=_blank>fig|6666666.640629.peg.684</a>	yes
A and B	Carbohydrates	Central carbohydrate metabolism	Pyruvate metabolism I: anaplerotic reactions, PEP	Pyruvate kinase (EC 2.7.1.40)	<a href=&#39;?page=Annotation&feature=fig|6666666.640627.peg.2215&#39; target=_blank>fig|6666666.640627.peg.2215</a>	yes	<a href=&#39;?page=Annotation&feature=fig|6666666.640629.peg.79&#39; target=_blank>fig|6666666.640629.peg.79</a>	yes
A and B	Carbohydrates	Central carbohydrate metabolism	Pyruvate metabolism II: acetyl-CoA, acetogenesis from pyruvate	Acetate kinase (EC 2.7.2.1)	<a href=&#39;?page=Annotation&feature=fig|6666666.640627.peg.2238&#39; target=_blank>fig|6666666.640627.peg.2238</a>	yes	<a href=&#39;?page=Annotation&feature=fig|6666666.640629.peg.53&#39; target=_blank>fig|6666666.640629.peg.53</a>	yes
A and B	Carbohydrates	Central carbohydrate metabolism	Pyruvate metabolism II: acetyl-CoA, acetogenesis from pyruvate	Acetyltransferase AcuA, acetyl-CoA synthetase inhibitor	<a href=&#39;?page=Annotation&feature=fig|6666666.640627.peg.2264&#39; target=_blank>fig|6666666.640627.peg.2264</a>	yes	<a href=&#39;?page=Annotation&feature=fig|6666666.640629.peg.39&#39; target=_blank>fig|6666666.640629.peg.39</a>	yes
A and B	Carbohydrates	Central carbohydrate metabolism	Pyruvate metabolism II: acetyl-CoA, acetogenesis from pyruvate	Aldehyde dehydrogenase (EC 1.2.1.3)	<a href=&#39;?page=Annotation&feature=fig|6666666.640627.peg.1832&#39; target=_blank>fig|6666666.640627.peg.1832</a>, <a href=&#39;?page=Annotation&feature=fig|6666666.640627.peg.2961&#39; target=_blank>fig|6666666.640627.peg.2961</a>	yes	<a href=&#39;?page=Annotation&feature=fig|6666666.640629.peg.412&#39; target=_blank>fig|6666666.640629.peg.412</a>, <a href=&#39;?page=Annotation&feature=fig|6666666.640629.peg.699&#39; target=_blank>fig|6666666.640629.peg.699</a>, <a href=&#39;?page=Annotation&feature=fig|6666666.640629.peg.1048&#39; target=_blank>fig|6666666.640629.peg.1048</a>, <a href=&#39;?page=Annotation&feature=fig|6666666…	yes
A and B	Carbohydrates	Central carbohydrate metabolism	Pyruvate metabolism II: acetyl-CoA, acetogenesis from pyruvate	Dihydrolipoamide acetyltransferase component of pyruvate dehydrogenase complex (EC 2.3.1.12)	<a href=&#39;?page=Annotation&feature=fig|6666666.640627.peg.625&#39; target=_blank>fig|6666666.640627.peg.625</a>, <a href=&#39;?page=Annotation&feature=fig|6666666.640627.peg.1463&#39; target=_blank>fig|6666666.640627.peg.1463</a>	yes	<a href=&#39;?page=Annotation&feature=fig|6666666.640629.peg.2252&#39; target=_blank>fig|6666666.640629.peg.2252</a>	yes
A and B	Carbohydrates	Central carbohydrate metabolism	Pyruvate metabolism II: acetyl-CoA, acetogenesis from pyruvate	Dihydrolipoamide dehydrogenase of pyruvate dehydrogenase complex (EC 1.8.1.4)	<a href=&#39;?page=Annotation&feature=fig|6666666.640627.peg.626&#39; target=_blank>fig|6666666.640627.peg.626</a>, <a href=&#39;?page=Annotation&feature=fig|6666666.640627.peg.1464&#39; target=_blank>fig|6666666.640627.peg.1464</a>	yes	<a href=&#39;?page=Annotation&feature=fig|6666666.640629.peg.2253&#39; target=_blank>fig|6666666.640629.peg.2253</a>	yes
A and B	Carbohydrates	Central carbohydrate metabolism	Pyruvate metabolism II: acetyl-CoA, acetogenesis from pyruvate	NAD-dependent protein deacetylase of SIR2 family	<a href=&#39;?page=Annotation&feature=fig|6666666.640627.peg.214&#39; target=_blank>fig|6666666.640627.peg.214</a>	yes	<a href=&#39;?page=Annotation&feature=fig|6666666.640629.peg.2160&#39; target=_blank>fig|6666666.640629.peg.2160</a>	yes
A and B	Carbohydrates	Central carbohydrate metabolism	Pyruvate metabolism II: acetyl-CoA, acetogenesis from pyruvate	NAD-independent protein deacetylase AcuC	<a href=&#39;?page=Annotation&feature=fig|6666666.640627.peg.2266&#39; target=_blank>fig|6666666.640627.peg.2266</a>	yes	<a href=&#39;?page=Annotation&feature=fig|6666666.640629.peg.37&#39; target=_blank>fig|6666666.640629.peg.37</a>	yes
A and B	Carbohydrates	Central carbohydrate metabolism	Pyruvate metabolism II: acetyl-CoA, acetogenesis from pyruvate	Phosphate acetyltransferase (EC 2.3.1.8)	<a href=&#39;?page=Annotation&feature=fig|6666666.640627.peg.2675&#39; target=_blank>fig|6666666.640627.peg.2675</a>	yes	<a href=&#39;?page=Annotation&feature=fig|6666666.640629.peg.4370&#39; target=_blank>fig|6666666.640629.peg.4370</a>	yes
A and B	Carbohydrates	Central carbohydrate metabolism	Pyruvate metabolism II: acetyl-CoA, acetogenesis from pyruvate	Pyruvate dehydrogenase E1 component alpha subunit (EC 1.2.4.1)	<a href=&#39;?page=Annotation&feature=fig|6666666.640627.peg.1461&#39; target=_blank>fig|6666666.640627.peg.1461</a>	yes	<a href=&#39;?page=Annotation&feature=fig|6666666.640629.peg.2250&#39; target=_blank>fig|6666666.640629.peg.2250</a>	yes
A and B	Carbohydrates	Central carbohydrate metabolism	Pyruvate metabolism II: acetyl-CoA, acetogenesis from pyruvate	Pyruvate dehydrogenase E1 component beta subunit (EC 1.2.4.1)	<a href=&#39;?page=Annotation&feature=fig|6666666.640627.peg.1462&#39; target=_blank>fig|6666666.640627.peg.1462</a>	yes	<a href=&#39;?page=Annotation&feature=fig|6666666.640629.peg.2251&#39; target=_blank>fig|6666666.640629.peg.2251</a>	yes
A and B	Carbohydrates	Central carbohydrate metabolism	TCA Cycle	2-oxoglutarate dehydrogenase E1 component (EC 1.2.4.2)	<a href=&#39;?page=Annotation&feature=fig|6666666.640627.peg.4202&#39; target=_blank>fig|6666666.640627.peg.4202</a>	yes	<a href=&#39;?page=Annotation&feature=fig|6666666.640629.peg.1291&#39; target=_blank>fig|6666666.640629.peg.1291</a>	yes
A and B	Carbohydrates	Central carbohydrate metabolism	TCA Cycle	Aconitate hydratase (EC 4.2.1.3)	<a href=&#39;?page=Annotation&feature=fig|6666666.640627.peg.4083&#39; target=_blank>fig|6666666.640627.peg.4083</a>, <a href=&#39;?page=Annotation&feature=fig|6666666.640627.peg.4389&#39; target=_blank>fig|6666666.640627.peg.4389</a>	yes	<a href=&#39;?page=Annotation&feature=fig|6666666.640629.peg.3528&#39; target=_blank>fig|6666666.640629.peg.3528</a>, <a href=&#39;?page=Annotation&feature=fig|6666666.640629.peg.3867&#39; target=_blank>fig|6666666.640629.peg.3867</a>	yes
A and B	Carbohydrates	Central carbohydrate metabolism	TCA Cycle	Citrate synthase (si) (EC 2.3.3.1)	<a href=&#39;?page=Annotation&feature=fig|6666666.640627.peg.2212&#39; target=_blank>fig|6666666.640627.peg.2212</a>, <a href=&#39;?page=Annotation&feature=fig|6666666.640627.peg.3469&#39; target=_blank>fig|6666666.640627.peg.3469</a>	yes	<a href=&#39;?page=Annotation&feature=fig|6666666.640629.peg.83&#39; target=_blank>fig|6666666.640629.peg.83</a>	yes
A and B	Carbohydrates	Central carbohydrate metabolism	TCA Cycle	Dihydrolipoamide dehydrogenase of pyruvate dehydrogenase complex (EC 1.8.1.4)	<a href=&#39;?page=Annotation&feature=fig|6666666.640627.peg.626&#39; target=_blank>fig|6666666.640627.peg.626</a>, <a href=&#39;?page=Annotation&feature=fig|6666666.640627.peg.1464&#39; target=_blank>fig|6666666.640627.peg.1464</a>	yes	<a href=&#39;?page=Annotation&feature=fig|6666666.640629.peg.2253&#39; target=_blank>fig|6666666.640629.peg.2253</a>	yes
A and B	Carbohydrates	Central carbohydrate metabolism	TCA Cycle	Dihydrolipoamide succinyltransferase component (E2) of 2-oxoglutarate dehydrogenase complex (EC 2.3.1.61)	<a href=&#39;?page=Annotation&feature=fig|6666666.640627.peg.4203&#39; target=_blank>fig|6666666.640627.peg.4203</a>	yes	<a href=&#39;?page=Annotation&feature=fig|6666666.640629.peg.1292&#39; target=_blank>fig|6666666.640629.peg.1292</a>	yes
A and B	Carbohydrates	Central carbohydrate metabolism	TCA Cycle	Fumarate hydratase class II (EC 4.2.1.2)	<a href=&#39;?page=Annotation&feature=fig|6666666.640627.peg.1231&#39; target=_blank>fig|6666666.640627.peg.1231</a>	yes	<a href=&#39;?page=Annotation&feature=fig|6666666.640629.peg.1368&#39; target=_blank>fig|6666666.640629.peg.1368</a>	yes
A and B	Carbohydrates	Central carbohydrate metabolism	TCA Cycle	Isocitrate dehydrogenase [NADP] (EC 1.1.1.42)	<a href=&#39;?page=Annotation&feature=fig|6666666.640627.peg.2211&#39; target=_blank>fig|6666666.640627.peg.2211</a>	yes	<a href=&#39;?page=Annotation&feature=fig|6666666.640629.peg.84&#39; target=_blank>fig|6666666.640629.peg.84</a>	yes
A and B	Carbohydrates	Central carbohydrate metabolism	TCA Cycle	Malate dehydrogenase (EC 1.1.1.37)	<a href=&#39;?page=Annotation&feature=fig|6666666.640627.peg.2210&#39; target=_blank>fig|6666666.640627.peg.2210</a>	yes	<a href=&#39;?page=Annotation&feature=fig|6666666.640629.peg.85&#39; target=_blank>fig|6666666.640629.peg.85</a>	yes
A and B	Carbohydrates	Central carbohydrate metabolism	TCA Cycle	Malate:quinone oxidoreductase (EC 1.1.5.4)	<a href=&#39;?page=Annotation&feature=fig|6666666.640627.peg.3363&#39; target=_blank>fig|6666666.640627.peg.3363</a>	yes	<a href=&#39;?page=Annotation&feature=fig|6666666.640629.peg.2016&#39; target=_blank>fig|6666666.640629.peg.2016</a>, <a href=&#39;?page=Annotation&feature=fig|6666666.640629.peg.2814&#39; target=_blank>fig|6666666.640629.peg.2814</a>	yes
A and B	Carbohydrates	Central carbohydrate metabolism	TCA Cycle	Succinyl-CoA ligase [ADP-forming] alpha chain (EC 6.2.1.5)	<a href=&#39;?page=Annotation&feature=fig|6666666.640627.peg.1599&#39; target=_blank>fig|6666666.640627.peg.1599</a>	yes	<a href=&#39;?page=Annotation&feature=fig|6666666.640629.peg.3407&#39; target=_blank>fig|6666666.640629.peg.3407</a>	yes
A and B	Carbohydrates	Central carbohydrate metabolism	TCA Cycle	Succinyl-CoA ligase [ADP-forming] beta chain (EC 6.2.1.5)	<a href=&#39;?page=Annotation&feature=fig|6666666.640627.peg.1598&#39; target=_blank>fig|6666666.640627.peg.1598</a>	yes	<a href=&#39;?page=Annotation&feature=fig|6666666.640629.peg.3406&#39; target=_blank>fig|6666666.640629.peg.3406</a>	yes
A	Carbohydrates	Central carbohydrate metabolism	Dehydrogenase complexes	Dihydrolipoamide dehydrogenase of acetoin dehydrogenase (EC 1.8.1.4)	<a href=&#39;?page=Annotation&feature=fig|6666666.640627.peg.3533&#39; target=_blank>fig|6666666.640627.peg.3533</a>	yes	<input type=&#39;button&#39; class=&#39;button&#39; value=&#39;find&#39; onclick=&#39;window.open("?page=SearchGene&fr=Dihydrolipoamide dehydrogenase of acetoin dehydrogenase (EC 1.8.1.4)&organism=6666666.640629&subsystem=Dehydrogenase_complexes&template_gene=fig|6666666.640627.peg.3533");&#39;>	no
A	Carbohydrates	Central carbohydrate metabolism	Dihydroxyacetone kinases	DHA-specific IIA component	<a href=&#39;?page=Annotation&feature=fig|6666666.640627.peg.667&#39; target=_blank>fig|6666666.640627.peg.667</a>	yes	<input type=&#39;button&#39; class=&#39;button&#39; value=&#39;find&#39; onclick=&#39;window.open("?page=SearchGene&fr=DHA-specific IIA component&organism=6666666.640629&subsystem=Dihydroxyacetone_kinases&template_gene=fig|6666666.640627.peg.667");&#39;>	no
A	Carbohydrates	Central carbohydrate metabolism	Dihydroxyacetone kinases	Phosphoenolpyruvate-dihydroxyacetone phosphotransferase (EC 2.7.1.121), ADP-binding subunit DhaL	<a href=&#39;?page=Annotation&feature=fig|6666666.640627.peg.668&#39; target=_blank>fig|6666666.640627.peg.668</a>	yes	<input type=&#39;button&#39; class=&#39;button&#39; value=&#39;find&#39; onclick=&#39;window.open("?page=SearchGene&fr=Phosphoenolpyruvate-dihydroxyacetone phosphotransferase (EC 2.7.1.121), ADP-binding subunit DhaL&organism=6666666.640629&subsystem=Dihydroxyacetone_kinases&template_gene=fig|6666666.640627.peg.668");&#39;>	no
A	Carbohydrates	Central carbohydrate metabolism	Dihydroxyacetone kinases	Phosphoenolpyruvate-dihydroxyacetone phosphotransferase (EC 2.7.1.121), subunit DhaM	<a href=&#39;?page=Annotation&feature=fig|6666666.640627.peg.667&#39; target=_blank>fig|6666666.640627.peg.667</a>	yes	<input type=&#39;button&#39; class=&#39;button&#39; value=&#39;find&#39; onclick=&#39;window.open("?page=SearchGene&fr=Phosphoenolpyruvate-dihydroxyacetone phosphotransferase (EC 2.7.1.121), subunit DhaM&organism=6666666.640629&subsystem=Dihydroxyacetone_kinases&template_gene=fig|6666666.640627.peg.667");&#39;>	no
A	Carbohydrates	Central carbohydrate metabolism	Dihydroxyacetone kinases	Putative dihydroxyacetone kinase (EC 2.7.1.29), ADP-binding subunit	<a href=&#39;?page=Annotation&feature=fig|6666666.640627.peg.4171&#39; target=_blank>fig|6666666.640627.peg.4171</a>	yes	<input type=&#39;button&#39; class=&#39;button&#39; value=&#39;find&#39; onclick=&#39;window.open("?page=SearchGene&fr=Putative dihydroxyacetone kinase (EC 2.7.1.29), ADP-binding subunit&organism=6666666.640629&subsystem=Dihydroxyacetone_kinases&template_gene=fig|6666666.640627.peg.4171");&#39;>	no
A	Carbohydrates	Central carbohydrate metabolism	Dihydroxyacetone kinases	Putative dihydroxyacetone kinase (EC 2.7.1.29), dihydroxyacetone binding subunit	<a href=&#39;?page=Annotation&feature=fig|6666666.640627.peg.4170&#39; target=_blank>fig|6666666.640627.peg.4170</a>	yes	<input type=&#39;button&#39; class=&#39;button&#39; value=&#39;find&#39; onclick=&#39;window.open("?page=SearchGene&fr=Putative dihydroxyacetone kinase (EC 2.7.1.29), dihydroxyacetone binding subunit&organism=6666666.640629&subsystem=Dihydroxyacetone_kinases&template_gene=fig|6666666.640627.peg.4170");&#39;>	no
B	Carbohydrates	Central carbohydrate metabolism	Glycolysis and Gluconeogenesis	Fructose-1,6-bisphosphatase, Bacillus type (EC 3.1.3.11)	<input type=&#39;button&#39; value=&#39;find&#39; onclick=&#39;window.open("?page=SearchGene&fr=Fructose-1,6-bisphosphatase, Bacillus type (EC 3.1.3.11)&organism=6666666.640627&subsystem=Glycolysis_and_Gluconeogenesis&template_gene=fig|6666666.640629.peg.3620");&#39;>	no	<a href=&#39;?page=Annotation&feature=fig|6666666.640629.peg.3620&#39; target=_blank>fig|6666666.640629.peg.3620</a>	yes
B	Carbohydrates	Central carbohydrate metabolism	Glycolysis and Gluconeogenesis	Fructose-bisphosphate aldolase class I (EC 4.1.2.13)	<input type=&#39;button&#39; value=&#39;find&#39; onclick=&#39;window.open("?page=SearchGene&fr=Fructose-bisphosphate aldolase class I (EC 4.1.2.13)&organism=6666666.640627&subsystem=Glycolysis_and_Gluconeogenesis&template_gene=fig|6666666.640629.peg.1862");&#39;>	no	<a href=&#39;?page=Annotation&feature=fig|6666666.640629.peg.1862&#39; target=_blank>fig|6666666.640629.peg.1862</a>	yes
B	Carbohydrates	Central carbohydrate metabolism	Glyoxylate bypass	Malate synthase (EC 2.3.3.9)	<input type=&#39;button&#39; value=&#39;find&#39; onclick=&#39;window.open("?page=SearchGene&fr=Malate synthase (EC 2.3.3.9)&organism=6666666.640627&subsystem=Glyoxylate_bypass&template_gene=fig|6666666.640629.peg.787");&#39;>	no	<a href=&#39;?page=Annotation&feature=fig|6666666.640629.peg.787&#39; target=_blank>fig|6666666.640629.peg.787</a>	yes
B	Carbohydrates	Central carbohydrate metabolism	Methylglyoxal Metabolism	Aldehyde dehydrogenase A (EC 1.2.1.22)	<input type=&#39;button&#39; value=&#39;find&#39; onclick=&#39;window.open("?page=SearchGene&fr=Aldehyde dehydrogenase A (EC 1.2.1.22)&organism=6666666.640627&subsystem=Methylglyoxal_Metabolism&template_gene=fig|6666666.640629.peg.1992");&#39;>	no	<a href=&#39;?page=Annotation&feature=fig|6666666.640629.peg.1992&#39; target=_blank>fig|6666666.640629.peg.1992</a>, <a href=&#39;?page=Annotation&feature=fig|6666666.640629.peg.2969&#39; target=_blank>fig|6666666.640629.peg.2969</a>	yes
B	Carbohydrates	Central carbohydrate metabolism	Pyruvate metabolism I: anaplerotic reactions, PEP	Phosphoenolpyruvate carboxylase (EC 4.1.1.31)	<input type=&#39;button&#39; value=&#39;find&#39; onclick=&#39;window.open("?page=SearchGene&fr=Phosphoenolpyruvate carboxylase (EC 4.1.1.31)&organism=6666666.640627&subsystem=Pyruvate_metabolism_I:_anaplerotic_reactions,_PEP&template_gene=fig|6666666.640629.peg.3182");&#39;>	no	<a href=&#39;?page=Annotation&feature=fig|6666666.640629.peg.3182&#39; target=_blank>fig|6666666.640629.peg.3182</a>	yes
B	Carbohydrates	Central carbohydrate metabolism	Pyruvate metabolism I: anaplerotic reactions, PEP	Two-component response regulator, malate (EC 2.7.3.-)	<input type=&#39;button&#39; value=&#39;find&#39; onclick=&#39;window.open("?page=SearchGene&fr=Two-component response regulator, malate (EC 2.7.3.-)&organism=6666666.640627&subsystem=Pyruvate_metabolism_I:_anaplerotic_reactions,_PEP&template_gene=fig|6666666.640629.peg.1057");&#39;>	no	<a href=&#39;?page=Annotation&feature=fig|6666666.640629.peg.1057&#39; target=_blank>fig|6666666.640629.peg.1057</a>, <a href=&#39;?page=Annotation&feature=fig|6666666.640629.peg.3611&#39; target=_blank>fig|6666666.640629.peg.3611</a>	yes
A and B	Carbohydrates	Di- and oligosaccharides	Lactose and Galactose Uptake and Utilization	Aldose 1-epimerase (EC 5.1.3.3)	<a href=&#39;?page=Annotation&feature=fig|6666666.640627.peg.3572&#39; target=_blank>fig|6666666.640627.peg.3572</a>	yes	<a href=&#39;?page=Annotation&feature=fig|6666666.640629.peg.1008&#39; target=_blank>fig|6666666.640629.peg.1008</a>	yes
A and B	Carbohydrates	Di- and oligosaccharides	Lactose and Galactose Uptake and Utilization	Galactokinase (EC 2.7.1.6)	<a href=&#39;?page=Annotation&feature=fig|6666666.640627.peg.3569&#39; target=_blank>fig|6666666.640627.peg.3569</a>	yes	<a href=&#39;?page=Annotation&feature=fig|6666666.640629.peg.1139&#39; target=_blank>fig|6666666.640629.peg.1139</a>	yes
A and B	Carbohydrates	Di- and oligosaccharides	Lactose and Galactose Uptake and Utilization	Galactose-1-phosphate uridylyltransferase (EC 2.7.7.10)	<a href=&#39;?page=Annotation&feature=fig|6666666.640627.peg.3571&#39; target=_blank>fig|6666666.640627.peg.3571</a>	yes	<a href=&#39;?page=Annotation&feature=fig|6666666.640629.peg.1137&#39; target=_blank>fig|6666666.640629.peg.1137</a>	yes
A and B	Carbohydrates	Di- and oligosaccharides	Lactose and Galactose Uptake and Utilization	UDP-glucose 4-epimerase (EC 5.1.3.2)	<a href=&#39;?page=Annotation&feature=fig|6666666.640627.peg.1103&#39; target=_blank>fig|6666666.640627.peg.1103</a>, <a href=&#39;?page=Annotation&feature=fig|6666666.640627.peg.3498&#39; target=_blank>fig|6666666.640627.peg.3498</a>, <a href=&#39;?page=Annotation&feature=fig|6666666.640627.peg.3570&#39; target=_blank>fig|6666666.640627.peg.3570</a>	yes	<a href=&#39;?page=Annotation&feature=fig|6666666.640629.peg.1138&#39; target=_blank>fig|6666666.640629.peg.1138</a>, <a href=&#39;?page=Annotation&feature=fig|6666666.640629.peg.1832&#39; target=_blank>fig|6666666.640629.peg.1832</a>, <a href=&#39;?page=Annotation&feature=fig|6666666.640629.peg.2617&#39; target=_blank>fig|6666666.640629.peg.2617</a>	yes
A	Carbohydrates	Di- and oligosaccharides	Beta-Glucoside Metabolism	6-phospho-beta-glucosidase (EC 3.2.1.86)	<a href=&#39;?page=Annotation&feature=fig|6666666.640627.peg.264&#39; target=_blank>fig|6666666.640627.peg.264</a>, <a href=&#39;?page=Annotation&feature=fig|6666666.640627.peg.1006&#39; target=_blank>fig|6666666.640627.peg.1006</a>, <a href=&#39;?page=Annotation&feature=fig|6666666.640627.peg.2379&#39; target=_blank>fig|6666666.640627.peg.2379</a>, <a href=&#39;?page=Annotation&feature=fig|66666…	yes	<input type=&#39;button&#39; class=&#39;button&#39; value=&#39;find&#39; onclick=&#39;window.open("?page=SearchGene&fr=6-phospho-beta-glucosidase (EC 3.2.1.86)&organism=6666666.640629&subsystem=Beta-Glucoside_Metabolism&template_gene=fig|6666666.640627.peg.264");&#39;>	no
A	Carbohydrates	Di- and oligosaccharides	Beta-Glucoside Metabolism	Cellobiose phosphotransferase system YdjC-like protein	<a href=&#39;?page=Annotation&feature=fig|6666666.640627.peg.2589&#39; target=_blank>fig|6666666.640627.peg.2589</a>	yes	<input type=&#39;button&#39; class=&#39;button&#39; value=&#39;find&#39; onclick=&#39;window.open("?page=SearchGene&fr=Cellobiose phosphotransferase system YdjC-like protein&organism=6666666.640629&subsystem=Beta-Glucoside_Metabolism&template_gene=fig|6666666.640627.peg.2589");&#39;>	no
A	Carbohydrates	Di- and oligosaccharides	Beta-Glucoside Metabolism	Outer surface protein of unknown function, cellobiose operon	<a href=&#39;?page=Annotation&feature=fig|6666666.640627.peg.2901&#39; target=_blank>fig|6666666.640627.peg.2901</a>	yes	<input type=&#39;button&#39; class=&#39;button&#39; value=&#39;find&#39; onclick=&#39;window.open("?page=SearchGene&fr=Outer surface protein of unknown function, cellobiose operon&organism=6666666.640629&subsystem=Beta-Glucoside_Metabolism&template_gene=fig|6666666.640627.peg.2901");&#39;>	no
A	Carbohydrates	Di- and oligosaccharides	Beta-Glucoside Metabolism	PTS system, cellobiose-specific IIB component (EC 2.7.1.69)	<a href=&#39;?page=Annotation&feature=fig|6666666.640627.peg.263&#39; target=_blank>fig|6666666.640627.peg.263</a>	yes	<input type=&#39;button&#39; class=&#39;button&#39; value=&#39;find&#39; onclick=&#39;window.open("?page=SearchGene&fr=PTS system, cellobiose-specific IIB component (EC 2.7.1.69)&organism=6666666.640629&subsystem=Beta-Glucoside_Metabolism&template_gene=fig|6666666.640627.peg.263");&#39;>	no
A	Carbohydrates	Di- and oligosaccharides	Beta-Glucoside Metabolism	Transcriptional antiterminator of lichenan operon, BglG family	<a href=&#39;?page=Annotation&feature=fig|6666666.640627.peg.3624&#39; target=_blank>fig|6666666.640627.peg.3624</a>	yes	<input type=&#39;button&#39; class=&#39;button&#39; value=&#39;find&#39; onclick=&#39;window.open("?page=SearchGene&fr=Transcriptional antiterminator of lichenan operon, BglG family&organism=6666666.640629&subsystem=Beta-Glucoside_Metabolism&template_gene=fig|6666666.640627.peg.3624");&#39;>	no
A	Carbohydrates	Di- and oligosaccharides	Lactose and Galactose Uptake and Utilization	Galactose operon repressor, GalR-LacI family of transcriptional regulators	<a href=&#39;?page=Annotation&feature=fig|6666666.640627.peg.3270&#39; target=_blank>fig|6666666.640627.peg.3270</a>	yes	<input type=&#39;button&#39; class=&#39;button&#39; value=&#39;find&#39; onclick=&#39;window.open("?page=SearchGene&fr=Galactose operon repressor, GalR-LacI family of transcriptional regulators&organism=6666666.640629&subsystem=Lactose_and_Galactose_Uptake_and_Utilization&template_gene=fig|6666666.640627.peg.3270");&#39;>	no
A	Carbohydrates	Di- and oligosaccharides	Lactose and Galactose Uptake and Utilization	Tagatose-6-phosphate kinase (EC 2.7.1.144)	<a href=&#39;?page=Annotation&feature=fig|6666666.640627.peg.1059&#39; target=_blank>fig|6666666.640627.peg.1059</a>, <a href=&#39;?page=Annotation&feature=fig|6666666.640627.peg.3279&#39; target=_blank>fig|6666666.640627.peg.3279</a>	yes	<input type=&#39;button&#39; class=&#39;button&#39; value=&#39;find&#39; onclick=&#39;window.open("?page=SearchGene&fr=Tagatose-6-phosphate kinase (EC 2.7.1.144)&organism=6666666.640629&subsystem=Lactose_and_Galactose_Uptake_and_Utilization&template_gene=fig|6666666.640627.peg.1059");&#39;>	no
A	Carbohydrates	Di- and oligosaccharides	Lactose utilization	Evolved beta-D-galactosidase, alpha subunit	<a href=&#39;?page=Annotation&feature=fig|6666666.640627.peg.3562&#39; target=_blank>fig|6666666.640627.peg.3562</a>	yes	<input type=&#39;button&#39; class=&#39;button&#39; value=&#39;find&#39; onclick=&#39;window.open("?page=SearchGene&fr=Evolved beta-D-galactosidase, alpha subunit&organism=6666666.640629&subsystem=Lactose_utilization&template_gene=fig|6666666.640627.peg.3562");&#39;>	no
B	Carbohydrates	Di- and oligosaccharides	Maltose and Maltodextrin Utilization	ABC-type sugar transport system, periplasmic binding protein YcjN	<input type=&#39;button&#39; value=&#39;find&#39; onclick=&#39;window.open("?page=SearchGene&fr=ABC-type sugar transport system, periplasmic binding protein YcjN&organism=6666666.640627&subsystem=Maltose_and_Maltodextrin_Utilization&template_gene=fig|6666666.640629.peg.4085");&#39;>	no	<a href=&#39;?page=Annotation&feature=fig|6666666.640629.peg.4085&#39; target=_blank>fig|6666666.640629.peg.4085</a>	yes
B	Carbohydrates	Di- and oligosaccharides	Maltose and Maltodextrin Utilization	Alpha-amylase (EC 3.2.1.1)	<input type=&#39;button&#39; value=&#39;find&#39; onclick=&#39;window.open("?page=SearchGene&fr=Alpha-amylase (EC 3.2.1.1)&organism=6666666.640627&subsystem=Maltose_and_Maltodextrin_Utilization&template_gene=fig|6666666.640629.peg.2694");&#39;>	no	<a href=&#39;?page=Annotation&feature=fig|6666666.640629.peg.2694&#39; target=_blank>fig|6666666.640629.peg.2694</a>	yes
B	Carbohydrates	Di- and oligosaccharides	Maltose and Maltodextrin Utilization	Beta-phosphoglucomutase (EC 5.4.2.6)	<input type=&#39;button&#39; value=&#39;find&#39; onclick=&#39;window.open("?page=SearchGene&fr=Beta-phosphoglucomutase (EC 5.4.2.6)&organism=6666666.640627&subsystem=Maltose_and_Maltodextrin_Utilization&template_gene=fig|6666666.640629.peg.4092");&#39;>	no	<a href=&#39;?page=Annotation&feature=fig|6666666.640629.peg.4092&#39; target=_blank>fig|6666666.640629.peg.4092</a>	yes
B	Carbohydrates	Di- and oligosaccharides	Maltose and Maltodextrin Utilization	Inner membrane ABC transporter permease protein YcjO	<input type=&#39;button&#39; value=&#39;find&#39; onclick=&#39;window.open("?page=SearchGene&fr=Inner membrane ABC transporter permease protein YcjO&organism=6666666.640627&subsystem=Maltose_and_Maltodextrin_Utilization&template_gene=fig|6666666.640629.peg.4086");&#39;>	no	<a href=&#39;?page=Annotation&feature=fig|6666666.640629.peg.4086&#39; target=_blank>fig|6666666.640629.peg.4086</a>	yes
B	Carbohydrates	Di- and oligosaccharides	Maltose and Maltodextrin Utilization	Inner membrane ABC transporter permease protein YcjP	<input type=&#39;button&#39; value=&#39;find&#39; onclick=&#39;window.open("?page=SearchGene&fr=Inner membrane ABC transporter permease protein YcjP&organism=6666666.640627&subsystem=Maltose_and_Maltodextrin_Utilization&template_gene=fig|6666666.640629.peg.4087");&#39;>	no	<a href=&#39;?page=Annotation&feature=fig|6666666.640629.peg.4087&#39; target=_blank>fig|6666666.640629.peg.4087</a>	yes
B	Carbohydrates	Di- and oligosaccharides	Maltose and Maltodextrin Utilization	Maltose O-acetyltransferase (EC 2.3.1.79)	<input type=&#39;button&#39; value=&#39;find&#39; onclick=&#39;window.open("?page=SearchGene&fr=Maltose O-acetyltransferase (EC 2.3.1.79)&organism=6666666.640627&subsystem=Maltose_and_Maltodextrin_Utilization&template_gene=fig|6666666.640629.peg.1347");&#39;>	no	<a href=&#39;?page=Annotation&feature=fig|6666666.640629.peg.1347&#39; target=_blank>fig|6666666.640629.peg.1347</a>	yes
B	Carbohydrates	Di- and oligosaccharides	Maltose and Maltodextrin Utilization	Oligo-1,6-glucosidase (EC 3.2.1.10)	<input type=&#39;button&#39; value=&#39;find&#39; onclick=&#39;window.open("?page=SearchGene&fr=Oligo-1,6-glucosidase (EC 3.2.1.10)&organism=6666666.640627&subsystem=Maltose_and_Maltodextrin_Utilization&template_gene=fig|6666666.640629.peg.989");&#39;>	no	<a href=&#39;?page=Annotation&feature=fig|6666666.640629.peg.989&#39; target=_blank>fig|6666666.640629.peg.989</a>	yes
B	Carbohydrates	Di- and oligosaccharides	Maltose and Maltodextrin Utilization	Putative oxidoreductase YcjS (EC 1.-.-.-), NADH-binding	<input type=&#39;button&#39; value=&#39;find&#39; onclick=&#39;window.open("?page=SearchGene&fr=Putative oxidoreductase YcjS (EC 1.-.-.-), NADH-binding&organism=6666666.640627&subsystem=Maltose_and_Maltodextrin_Utilization&template_gene=fig|6666666.640629.peg.4090");&#39;>	no	<a href=&#39;?page=Annotation&feature=fig|6666666.640629.peg.4090&#39; target=_blank>fig|6666666.640629.peg.4090</a>	yes
B	Carbohydrates	Di- and oligosaccharides	Maltose and Maltodextrin Utilization	Sugar phosphate isomerases/epimerases family protein YcjR	<input type=&#39;button&#39; value=&#39;find&#39; onclick=&#39;window.open("?page=SearchGene&fr=Sugar phosphate isomerases/epimerases family protein YcjR&organism=6666666.640627&subsystem=Maltose_and_Maltodextrin_Utilization&template_gene=fig|6666666.640629.peg.4089");&#39;>	no	<a href=&#39;?page=Annotation&feature=fig|6666666.640629.peg.4089&#39; target=_blank>fig|6666666.640629.peg.4089</a>	yes
B	Carbohydrates	Di- and oligosaccharides	Maltose and Maltodextrin Utilization	Transcriptional regulator YcjW, LacI family, possibly involved in maltodextrin utilization pathway	<input type=&#39;button&#39; value=&#39;find&#39; onclick=&#39;window.open("?page=SearchGene&fr=Transcriptional regulator YcjW, LacI family, possibly involved in maltodextrin utilization pathway&organism=6666666.640627&subsystem=Maltose_and_Maltodextrin_Utilization&template_gene=fig|6666666.640629.peg.4084");&#39;>	no	<a href=&#39;?page=Annotation&feature=fig|6666666.640629.peg.4084&#39; target=_blank>fig|6666666.640629.peg.4084</a>	yes
B	Carbohydrates	Di- and oligosaccharides	Maltose and Maltodextrin Utilization	Zinc-type alcohol dehydrogenase YcjQ	<input type=&#39;button&#39; value=&#39;find&#39; onclick=&#39;window.open("?page=SearchGene&fr=Zinc-type alcohol dehydrogenase YcjQ&organism=6666666.640627&subsystem=Maltose_and_Maltodextrin_Utilization&template_gene=fig|6666666.640629.peg.4088");&#39;>	no	<a href=&#39;?page=Annotation&feature=fig|6666666.640629.peg.4088&#39; target=_blank>fig|6666666.640629.peg.4088</a>	yes
B	Carbohydrates	Di- and oligosaccharides	Sucrose utilization	Sucrose phosphorylase (EC 2.4.1.7)	<input type=&#39;button&#39; value=&#39;find&#39; onclick=&#39;window.open("?page=SearchGene&fr=Sucrose phosphorylase (EC 2.4.1.7)&organism=6666666.640627&subsystem=Sucrose_utilization&template_gene=fig|6666666.640629.peg.1444");&#39;>	no	<a href=&#39;?page=Annotation&feature=fig|6666666.640629.peg.1444&#39; target=_blank>fig|6666666.640629.peg.1444</a>	yes
B	Carbohydrates	Di- and oligosaccharides	Sucrose utilization	Sucrose-6-phosphate hydrolase (EC 3.2.1.26)	<input type=&#39;button&#39; value=&#39;find&#39; onclick=&#39;window.open("?page=SearchGene&fr=Sucrose-6-phosphate hydrolase (EC 3.2.1.26)&organism=6666666.640627&subsystem=Sucrose_utilization&template_gene=fig|6666666.640629.peg.658");&#39;>	no	<a href=&#39;?page=Annotation&feature=fig|6666666.640629.peg.658&#39; target=_blank>fig|6666666.640629.peg.658</a>, <a href=&#39;?page=Annotation&feature=fig|6666666.640629.peg.2787&#39; target=_blank>fig|6666666.640629.peg.2787</a>, <a href=&#39;?page=Annotation&feature=fig|6666666.640629.peg.4359&#39; target=_blank>fig|6666666.640629.peg.4359</a>	yes
A and B	Carbohydrates	Fermentation	Acetolactate synthase subunits	Acetolactate synthase large subunit (EC 2.2.1.6)	<a href=&#39;?page=Annotation&feature=fig|6666666.640627.peg.381&#39; target=_blank>fig|6666666.640627.peg.381</a>	yes	<a href=&#39;?page=Annotation&feature=fig|6666666.640629.peg.1534&#39; target=_blank>fig|6666666.640629.peg.1534</a>	yes
A and B	Carbohydrates	Fermentation	Acetolactate synthase subunits	Acetolactate synthase small subunit (EC 2.2.1.6)	<a href=&#39;?page=Annotation&feature=fig|6666666.640627.peg.382&#39; target=_blank>fig|6666666.640627.peg.382</a>	yes	<a href=&#39;?page=Annotation&feature=fig|6666666.640629.peg.1535&#39; target=_blank>fig|6666666.640629.peg.1535</a>	yes
A and B	Carbohydrates	Fermentation	Acetyl-CoA fermentation to Butyrate	3-hydroxyacyl-CoA dehydrogenase (EC 1.1.1.35)	<a href=&#39;?page=Annotation&feature=fig|6666666.640627.peg.304&#39; target=_blank>fig|6666666.640627.peg.304</a>	yes	<a href=&#39;?page=Annotation&feature=fig|6666666.640629.peg.1069&#39; target=_blank>fig|6666666.640629.peg.1069</a>, <a href=&#39;?page=Annotation&feature=fig|6666666.640629.peg.1072&#39; target=_blank>fig|6666666.640629.peg.1072</a>, <a href=&#39;?page=Annotation&feature=fig|6666666.640629.peg.2687&#39; target=_blank>fig|6666666.640629.peg.2687</a>	yes
A and B	Carbohydrates	Fermentation	Acetyl-CoA fermentation to Butyrate	3-hydroxybutyrate dehydrogenase (EC 1.1.1.30)	<a href=&#39;?page=Annotation&feature=fig|6666666.640627.peg.2467&#39; target=_blank>fig|6666666.640627.peg.2467</a>	yes	<a href=&#39;?page=Annotation&feature=fig|6666666.640629.peg.2854&#39; target=_blank>fig|6666666.640629.peg.2854</a>	yes
A and B	Carbohydrates	Fermentation	Acetyl-CoA fermentation to Butyrate	3-hydroxybutyryl-CoA dehydrogenase (EC 1.1.1.157)	<a href=&#39;?page=Annotation&feature=fig|6666666.640627.peg.304&#39; target=_blank>fig|6666666.640627.peg.304</a>, <a href=&#39;?page=Annotation&feature=fig|6666666.640627.peg.2657&#39; target=_blank>fig|6666666.640627.peg.2657</a>	yes	<a href=&#39;?page=Annotation&feature=fig|6666666.640629.peg.1069&#39; target=_blank>fig|6666666.640629.peg.1069</a>, <a href=&#39;?page=Annotation&feature=fig|6666666.640629.peg.1072&#39; target=_blank>fig|6666666.640629.peg.1072</a>, <a href=&#39;?page=Annotation&feature=fig|6666666.640629.peg.2687&#39; target=_blank>fig|6666666.640629.peg.2687</a>, <a href=&#39;?page=Annotation&feature=fig|666…	yes
A and B	Carbohydrates	Fermentation	Acetyl-CoA fermentation to Butyrate	Acetyl-CoA acetyltransferase (EC 2.3.1.9)	<a href=&#39;?page=Annotation&feature=fig|6666666.640627.peg.305&#39; target=_blank>fig|6666666.640627.peg.305</a>, <a href=&#39;?page=Annotation&feature=fig|6666666.640627.peg.940&#39; target=_blank>fig|6666666.640627.peg.940</a>, <a href=&#39;?page=Annotation&feature=fig|6666666.640627.peg.2466&#39; target=_blank>fig|6666666.640627.peg.2466</a>, <a href=&#39;?page=Annotation&feature=fig|6666666…	yes	<a href=&#39;?page=Annotation&feature=fig|6666666.640629.peg.1067&#39; target=_blank>fig|6666666.640629.peg.1067</a>, <a href=&#39;?page=Annotation&feature=fig|6666666.640629.peg.1090&#39; target=_blank>fig|6666666.640629.peg.1090</a>, <a href=&#39;?page=Annotation&feature=fig|6666666.640629.peg.1104&#39; target=_blank>fig|6666666.640629.peg.1104</a>, <a href=&#39;?page=Annotation&feature=fig|666…	yes
A and B	Carbohydrates	Fermentation	Acetyl-CoA fermentation to Butyrate	Electron transfer flavoprotein, alpha subunit	<a href=&#39;?page=Annotation&feature=fig|6666666.640627.peg.2178&#39; target=_blank>fig|6666666.640627.peg.2178</a>	yes	<a href=&#39;?page=Annotation&feature=fig|6666666.640629.peg.127&#39; target=_blank>fig|6666666.640629.peg.127</a>, <a href=&#39;?page=Annotation&feature=fig|6666666.640629.peg.1070&#39; target=_blank>fig|6666666.640629.peg.1070</a>	yes
A and B	Carbohydrates	Fermentation	Acetyl-CoA fermentation to Butyrate	Electron transfer flavoprotein, beta subunit	<a href=&#39;?page=Annotation&feature=fig|6666666.640627.peg.2179&#39; target=_blank>fig|6666666.640627.peg.2179</a>	yes	<a href=&#39;?page=Annotation&feature=fig|6666666.640629.peg.126&#39; target=_blank>fig|6666666.640629.peg.126</a>, <a href=&#39;?page=Annotation&feature=fig|6666666.640629.peg.1071&#39; target=_blank>fig|6666666.640629.peg.1071</a>	yes
A and B	Carbohydrates	Fermentation	Acetyl-CoA fermentation to Butyrate	Enoyl-CoA hydratase (EC 4.2.1.17)	<a href=&#39;?page=Annotation&feature=fig|6666666.640627.peg.290&#39; target=_blank>fig|6666666.640627.peg.290</a>, <a href=&#39;?page=Annotation&feature=fig|6666666.640627.peg.301&#39; target=_blank>fig|6666666.640627.peg.301</a>, <a href=&#39;?page=Annotation&feature=fig|6666666.640627.peg.302&#39; target=_blank>fig|6666666.640627.peg.302</a>, <a href=&#39;?page=Annotation&feature=fig|6666666.6…	yes	<a href=&#39;?page=Annotation&feature=fig|6666666.640629.peg.125&#39; target=_blank>fig|6666666.640629.peg.125</a>, <a href=&#39;?page=Annotation&feature=fig|6666666.640629.peg.1065&#39; target=_blank>fig|6666666.640629.peg.1065</a>, <a href=&#39;?page=Annotation&feature=fig|6666666.640629.peg.1380&#39; target=_blank>fig|6666666.640629.peg.1380</a>, <a href=&#39;?page=Annotation&feature=fig|66666…	yes
A and B	Carbohydrates	Fermentation	Butanol Biosynthesis	3-hydroxybutyryl-CoA dehydrogenase (EC 1.1.1.157)	<a href=&#39;?page=Annotation&feature=fig|6666666.640627.peg.304&#39; target=_blank>fig|6666666.640627.peg.304</a>, <a href=&#39;?page=Annotation&feature=fig|6666666.640627.peg.2657&#39; target=_blank>fig|6666666.640627.peg.2657</a>	yes	<a href=&#39;?page=Annotation&feature=fig|6666666.640629.peg.1069&#39; target=_blank>fig|6666666.640629.peg.1069</a>, <a href=&#39;?page=Annotation&feature=fig|6666666.640629.peg.1072&#39; target=_blank>fig|6666666.640629.peg.1072</a>, <a href=&#39;?page=Annotation&feature=fig|6666666.640629.peg.2687&#39; target=_blank>fig|6666666.640629.peg.2687</a>, <a href=&#39;?page=Annotation&feature=fig|666…	yes
A and B	Carbohydrates	Fermentation	Butanol Biosynthesis	Acetyl-CoA acetyltransferase (EC 2.3.1.9)	<a href=&#39;?page=Annotation&feature=fig|6666666.640627.peg.305&#39; target=_blank>fig|6666666.640627.peg.305</a>, <a href=&#39;?page=Annotation&feature=fig|6666666.640627.peg.940&#39; target=_blank>fig|6666666.640627.peg.940</a>, <a href=&#39;?page=Annotation&feature=fig|6666666.640627.peg.2466&#39; target=_blank>fig|6666666.640627.peg.2466</a>, <a href=&#39;?page=Annotation&feature=fig|6666666…	yes	<a href=&#39;?page=Annotation&feature=fig|6666666.640629.peg.1067&#39; target=_blank>fig|6666666.640629.peg.1067</a>, <a href=&#39;?page=Annotation&feature=fig|6666666.640629.peg.1090&#39; target=_blank>fig|6666666.640629.peg.1090</a>, <a href=&#39;?page=Annotation&feature=fig|6666666.640629.peg.1104&#39; target=_blank>fig|6666666.640629.peg.1104</a>, <a href=&#39;?page=Annotation&feature=fig|666…	yes
A and B	Carbohydrates	Fermentation	Butanol Biosynthesis	Alcohol dehydrogenase (EC 1.1.1.1)	<a href=&#39;?page=Annotation&feature=fig|6666666.640627.peg.1410&#39; target=_blank>fig|6666666.640627.peg.1410</a>, <a href=&#39;?page=Annotation&feature=fig|6666666.640627.peg.3998&#39; target=_blank>fig|6666666.640627.peg.3998</a>	yes	<a href=&#39;?page=Annotation&feature=fig|6666666.640629.peg.2416&#39; target=_blank>fig|6666666.640629.peg.2416</a>, <a href=&#39;?page=Annotation&feature=fig|6666666.640629.peg.2734&#39; target=_blank>fig|6666666.640629.peg.2734</a>	yes
A and B	Carbohydrates	Fermentation	Butanol Biosynthesis	Enoyl-CoA hydratase (EC 4.2.1.17)	<a href=&#39;?page=Annotation&feature=fig|6666666.640627.peg.290&#39; target=_blank>fig|6666666.640627.peg.290</a>, <a href=&#39;?page=Annotation&feature=fig|6666666.640627.peg.301&#39; target=_blank>fig|6666666.640627.peg.301</a>, <a href=&#39;?page=Annotation&feature=fig|6666666.640627.peg.302&#39; target=_blank>fig|6666666.640627.peg.302</a>, <a href=&#39;?page=Annotation&feature=fig|6666666.6…	yes	<a href=&#39;?page=Annotation&feature=fig|6666666.640629.peg.125&#39; target=_blank>fig|6666666.640629.peg.125</a>, <a href=&#39;?page=Annotation&feature=fig|6666666.640629.peg.1065&#39; target=_blank>fig|6666666.640629.peg.1065</a>, <a href=&#39;?page=Annotation&feature=fig|6666666.640629.peg.1380&#39; target=_blank>fig|6666666.640629.peg.1380</a>, <a href=&#39;?page=Annotation&feature=fig|66666…	yes
A and B	Carbohydrates	Fermentation	Fermentations: Lactate	Acetate kinase (EC 2.7.2.1)	<a href=&#39;?page=Annotation&feature=fig|6666666.640627.peg.2238&#39; target=_blank>fig|6666666.640627.peg.2238</a>	yes	<a href=&#39;?page=Annotation&feature=fig|6666666.640629.peg.53&#39; target=_blank>fig|6666666.640629.peg.53</a>	yes
A and B	Carbohydrates	Fermentation	Fermentations: Lactate	L-lactate dehydrogenase (EC 1.1.1.27)	<a href=&#39;?page=Annotation&feature=fig|6666666.640627.peg.3904&#39; target=_blank>fig|6666666.640627.peg.3904</a>	yes	<a href=&#39;?page=Annotation&feature=fig|6666666.640629.peg.321&#39; target=_blank>fig|6666666.640629.peg.321</a>	yes
A and B	Carbohydrates	Fermentation	Fermentations: Lactate	Phosphate acetyltransferase (EC 2.3.1.8)	<a href=&#39;?page=Annotation&feature=fig|6666666.640627.peg.2675&#39; target=_blank>fig|6666666.640627.peg.2675</a>	yes	<a href=&#39;?page=Annotation&feature=fig|6666666.640629.peg.4370&#39; target=_blank>fig|6666666.640629.peg.4370</a>	yes
A	Carbohydrates	Fermentation	Butanol Biosynthesis	Acetaldehyde dehydrogenase (EC 1.2.1.10)	<a href=&#39;?page=Annotation&feature=fig|6666666.640627.peg.3998&#39; target=_blank>fig|6666666.640627.peg.3998</a>	yes	<input type=&#39;button&#39; class=&#39;button&#39; value=&#39;find&#39; onclick=&#39;window.open("?page=SearchGene&fr=Acetaldehyde dehydrogenase (EC 1.2.1.10)&organism=6666666.640629&subsystem=Butanol_Biosynthesis&template_gene=fig|6666666.640627.peg.3998");&#39;>	no
A	Carbohydrates	Fermentation	Butanol Biosynthesis	Pyruvate formate-lyase (EC 2.3.1.54)	<a href=&#39;?page=Annotation&feature=fig|6666666.640627.peg.1581&#39; target=_blank>fig|6666666.640627.peg.1581</a>, <a href=&#39;?page=Annotation&feature=fig|6666666.640627.peg.3996&#39; target=_blank>fig|6666666.640627.peg.3996</a>	yes	<input type=&#39;button&#39; class=&#39;button&#39; value=&#39;find&#39; onclick=&#39;window.open("?page=SearchGene&fr=Pyruvate formate-lyase (EC 2.3.1.54)&organism=6666666.640629&subsystem=Butanol_Biosynthesis&template_gene=fig|6666666.640627.peg.1581");&#39;>	no
A	Carbohydrates	Fermentation	Fermentations: Mixed acid	Pyruvate formate-lyase activating enzyme (EC 1.97.1.4)	<a href=&#39;?page=Annotation&feature=fig|6666666.640627.peg.3995&#39; target=_blank>fig|6666666.640627.peg.3995</a>	yes	<input type=&#39;button&#39; class=&#39;button&#39; value=&#39;find&#39; onclick=&#39;window.open("?page=SearchGene&fr=Pyruvate formate-lyase activating enzyme (EC 1.97.1.4)&organism=6666666.640629&subsystem=Fermentations:_Mixed_acid&template_gene=fig|6666666.640627.peg.3995");&#39;>	no
B	Carbohydrates	Fermentation	Acetoin, butanediol metabolism	2,3-butanediol dehydrogenase, S-alcohol forming, (S)-acetoin-specific (EC 1.1.1.76)	<input type=&#39;button&#39; value=&#39;find&#39; onclick=&#39;window.open("?page=SearchGene&fr=2,3-butanediol dehydrogenase, S-alcohol forming, (S)-acetoin-specific (EC 1.1.1.76)&organism=6666666.640627&subsystem=Acetoin,_butanediol_metabolism&template_gene=fig|6666666.640629.peg.3793");&#39;>	no	<a href=&#39;?page=Annotation&feature=fig|6666666.640629.peg.3793&#39; target=_blank>fig|6666666.640629.peg.3793</a>	yes
A and B	Carbohydrates	Monosaccharides	D-galactarate, D-glucarate and D-glycerate catabolism	2-hydroxy-3-oxopropionate reductase (EC 1.1.1.60)	<a href=&#39;?page=Annotation&feature=fig|6666666.640627.peg.3796&#39; target=_blank>fig|6666666.640627.peg.3796</a>	yes	<a href=&#39;?page=Annotation&feature=fig|6666666.640629.peg.3592&#39; target=_blank>fig|6666666.640629.peg.3592</a>	yes
A and B	Carbohydrates	Monosaccharides	D-galactarate, D-glucarate and D-glycerate catabolism	Glycerate kinase (EC 2.7.1.31)	<a href=&#39;?page=Annotation&feature=fig|6666666.640627.peg.20&#39; target=_blank>fig|6666666.640627.peg.20</a>	yes	<a href=&#39;?page=Annotation&feature=fig|6666666.640629.peg.995&#39; target=_blank>fig|6666666.640629.peg.995</a>, <a href=&#39;?page=Annotation&feature=fig|6666666.640629.peg.4094&#39; target=_blank>fig|6666666.640629.peg.4094</a>	yes
A and B	Carbohydrates	Monosaccharides	D-galactarate, D-glucarate and D-glycerate catabolism - gjo	2-hydroxy-3-oxopropionate reductase (EC 1.1.1.60)	<a href=&#39;?page=Annotation&feature=fig|6666666.640627.peg.3796&#39; target=_blank>fig|6666666.640627.peg.3796</a>	yes	<a href=&#39;?page=Annotation&feature=fig|6666666.640629.peg.3592&#39; target=_blank>fig|6666666.640629.peg.3592</a>	yes
A and B	Carbohydrates	Monosaccharides	D-galactarate, D-glucarate and D-glycerate catabolism - gjo	Glycerate kinase (EC 2.7.1.31)	<a href=&#39;?page=Annotation&feature=fig|6666666.640627.peg.20&#39; target=_blank>fig|6666666.640627.peg.20</a>	yes	<a href=&#39;?page=Annotation&feature=fig|6666666.640629.peg.995&#39; target=_blank>fig|6666666.640629.peg.995</a>, <a href=&#39;?page=Annotation&feature=fig|6666666.640629.peg.4094&#39; target=_blank>fig|6666666.640629.peg.4094</a>	yes
A and B	Carbohydrates	Monosaccharides	D-gluconate and ketogluconates metabolism	6-phosphogluconate dehydrogenase, decarboxylating (EC 1.1.1.44)	<a href=&#39;?page=Annotation&feature=fig|6666666.640627.peg.2578&#39; target=_blank>fig|6666666.640627.peg.2578</a>	yes	<a href=&#39;?page=Annotation&feature=fig|6666666.640629.peg.1005&#39; target=_blank>fig|6666666.640629.peg.1005</a>	yes
A and B	Carbohydrates	Monosaccharides	D-gluconate and ketogluconates metabolism	Gluconokinase (EC 2.7.1.12)	<a href=&#39;?page=Annotation&feature=fig|6666666.640627.peg.4146&#39; target=_blank>fig|6666666.640627.peg.4146</a>	yes	<a href=&#39;?page=Annotation&feature=fig|6666666.640629.peg.2036&#39; target=_blank>fig|6666666.640629.peg.2036</a>, <a href=&#39;?page=Annotation&feature=fig|6666666.640629.peg.3102&#39; target=_blank>fig|6666666.640629.peg.3102</a>	yes
A and B	Carbohydrates	Monosaccharides	D-ribose utilization	Ribokinase (EC 2.7.1.15)	<a href=&#39;?page=Annotation&feature=fig|6666666.640627.peg.3765&#39; target=_blank>fig|6666666.640627.peg.3765</a>	yes	<a href=&#39;?page=Annotation&feature=fig|6666666.640629.peg.2657&#39; target=_blank>fig|6666666.640629.peg.2657</a>	yes
A and B	Carbohydrates	Monosaccharides	Deoxyribose and Deoxynucleoside Catabolism	Deoxyribose-phosphate aldolase (EC 4.1.2.4)	<a href=&#39;?page=Annotation&feature=fig|6666666.640627.peg.1955&#39; target=_blank>fig|6666666.640627.peg.1955</a>	yes	<a href=&#39;?page=Annotation&feature=fig|6666666.640629.peg.273&#39; target=_blank>fig|6666666.640629.peg.273</a>	yes
A and B	Carbohydrates	Monosaccharides	Deoxyribose and Deoxynucleoside Catabolism	Phosphopentomutase (EC 5.4.2.7)	<a href=&#39;?page=Annotation&feature=fig|6666666.640627.peg.1817&#39; target=_blank>fig|6666666.640627.peg.1817</a>	yes	<a href=&#39;?page=Annotation&feature=fig|6666666.640629.peg.2582&#39; target=_blank>fig|6666666.640629.peg.2582</a>	yes
A and B	Carbohydrates	Monosaccharides	Deoxyribose and Deoxynucleoside Catabolism	Purine nucleoside phosphorylase (EC 2.4.2.1)	<a href=&#39;?page=Annotation&feature=fig|6666666.640627.peg.1816&#39; target=_blank>fig|6666666.640627.peg.1816</a>, <a href=&#39;?page=Annotation&feature=fig|6666666.640627.peg.2340&#39; target=_blank>fig|6666666.640627.peg.2340</a>	yes	<a href=&#39;?page=Annotation&feature=fig|6666666.640629.peg.603&#39; target=_blank>fig|6666666.640629.peg.603</a>, <a href=&#39;?page=Annotation&feature=fig|6666666.640629.peg.717&#39; target=_blank>fig|6666666.640629.peg.717</a>, <a href=&#39;?page=Annotation&feature=fig|6666666.640629.peg.2581&#39; target=_blank>fig|6666666.640629.peg.2581</a>	yes
A and B	Carbohydrates	Monosaccharides	Deoxyribose and Deoxynucleoside Catabolism	Pyrimidine-nucleoside phosphorylase (EC 2.4.2.2)	<a href=&#39;?page=Annotation&feature=fig|6666666.640627.peg.1815&#39; target=_blank>fig|6666666.640627.peg.1815</a>	yes	<a href=&#39;?page=Annotation&feature=fig|6666666.640629.peg.2580&#39; target=_blank>fig|6666666.640629.peg.2580</a>	yes
A and B	Carbohydrates	Monosaccharides	Deoxyribose and Deoxynucleoside Catabolism	Ribokinase (EC 2.7.1.15)	<a href=&#39;?page=Annotation&feature=fig|6666666.640627.peg.3765&#39; target=_blank>fig|6666666.640627.peg.3765</a>	yes	<a href=&#39;?page=Annotation&feature=fig|6666666.640629.peg.2657&#39; target=_blank>fig|6666666.640629.peg.2657</a>	yes
A and B	Carbohydrates	Monosaccharides	Fructose utilization	1-phosphofructokinase (EC 2.7.1.56)	<a href=&#39;?page=Annotation&feature=fig|6666666.640627.peg.2869&#39; target=_blank>fig|6666666.640627.peg.2869</a>	yes	<a href=&#39;?page=Annotation&feature=fig|6666666.640629.peg.813&#39; target=_blank>fig|6666666.640629.peg.813</a>	yes
A and B	Carbohydrates	Monosaccharides	Fructose utilization	Fructokinase (EC 2.7.1.4)	<a href=&#39;?page=Annotation&feature=fig|6666666.640627.peg.3619&#39; target=_blank>fig|6666666.640627.peg.3619</a>	yes	<a href=&#39;?page=Annotation&feature=fig|6666666.640629.peg.2788&#39; target=_blank>fig|6666666.640629.peg.2788</a>	yes
A and B	Carbohydrates	Monosaccharides	Fructose utilization	Phosphoenolpyruvate-protein phosphotransferase of PTS system (EC 2.7.3.9)	<a href=&#39;?page=Annotation&feature=fig|6666666.640627.peg.2444&#39; target=_blank>fig|6666666.640627.peg.2444</a>	yes	<a href=&#39;?page=Annotation&feature=fig|6666666.640629.peg.816&#39; target=_blank>fig|6666666.640629.peg.816</a>	yes
A and B	Carbohydrates	Monosaccharides	Fructose utilization	Phosphotransferase system, phosphocarrier protein HPr	<a href=&#39;?page=Annotation&feature=fig|6666666.640627.peg.2339&#39; target=_blank>fig|6666666.640627.peg.2339</a>	yes	<a href=&#39;?page=Annotation&feature=fig|6666666.640629.peg.815&#39; target=_blank>fig|6666666.640629.peg.815</a>, <a href=&#39;?page=Annotation&feature=fig|6666666.640629.peg.3357&#39; target=_blank>fig|6666666.640629.peg.3357</a>	yes
A and B	Carbohydrates	Monosaccharides	Fructose utilization	Transaldolase (EC 2.2.1.2)	<a href=&#39;?page=Annotation&feature=fig|6666666.640627.peg.2646&#39; target=_blank>fig|6666666.640627.peg.2646</a>	yes	<a href=&#39;?page=Annotation&feature=fig|6666666.640629.peg.1174&#39; target=_blank>fig|6666666.640629.peg.1174</a>, <a href=&#39;?page=Annotation&feature=fig|6666666.640629.peg.3004&#39; target=_blank>fig|6666666.640629.peg.3004</a>	yes
A and B	Carbohydrates	Monosaccharides	Fructose utilization	Transcriptional repressor of the fructose operon, DeoR family	<a href=&#39;?page=Annotation&feature=fig|6666666.640627.peg.2870&#39; target=_blank>fig|6666666.640627.peg.2870</a>	yes	<a href=&#39;?page=Annotation&feature=fig|6666666.640629.peg.812&#39; target=_blank>fig|6666666.640629.peg.812</a>, <a href=&#39;?page=Annotation&feature=fig|6666666.640629.peg.1156&#39; target=_blank>fig|6666666.640629.peg.1156</a>	yes
A	Carbohydrates	Monosaccharides	D-galactarate, D-glucarate and D-glycerate catabolism	Sugar diacid utilization regulator SdaR	<a href=&#39;?page=Annotation&feature=fig|6666666.640627.peg.2831&#39; target=_blank>fig|6666666.640627.peg.2831</a>, <a href=&#39;?page=Annotation&feature=fig|6666666.640627.peg.3897&#39; target=_blank>fig|6666666.640627.peg.3897</a>	yes	<input type=&#39;button&#39; class=&#39;button&#39; value=&#39;find&#39; onclick=&#39;window.open("?page=SearchGene&fr=Sugar diacid utilization regulator SdaR&organism=6666666.640629&subsystem=D-galactarate,_D-glucarate_and_D-glycerate_catabolism&template_gene=fig|6666666.640627.peg.2831");&#39;>	no
A	Carbohydrates	Monosaccharides	D-gluconate and ketogluconates metabolism	Gluconate 2-dehydrogenase (EC 1.1.99.3), membrane-bound, flavoprotein	<a href=&#39;?page=Annotation&feature=fig|6666666.640627.peg.1911&#39; target=_blank>fig|6666666.640627.peg.1911</a>	yes	<input type=&#39;button&#39; class=&#39;button&#39; value=&#39;find&#39; onclick=&#39;window.open("?page=SearchGene&fr=Gluconate 2-dehydrogenase (EC 1.1.99.3), membrane-bound, flavoprotein&organism=6666666.640629&subsystem=D-gluconate_and_ketogluconates_metabolism&template_gene=fig|6666666.640627.peg.1911");&#39;>	no
A	Carbohydrates	Monosaccharides	D-gluconate and ketogluconates metabolism	Gluconate 2-dehydrogenase (EC 1.1.99.3), membrane-bound, gamma subunit	<a href=&#39;?page=Annotation&feature=fig|6666666.640627.peg.1912&#39; target=_blank>fig|6666666.640627.peg.1912</a>	yes	<input type=&#39;button&#39; class=&#39;button&#39; value=&#39;find&#39; onclick=&#39;window.open("?page=SearchGene&fr=Gluconate 2-dehydrogenase (EC 1.1.99.3), membrane-bound, gamma subunit&organism=6666666.640629&subsystem=D-gluconate_and_ketogluconates_metabolism&template_gene=fig|6666666.640627.peg.1912");&#39;>	no
A	Carbohydrates	Monosaccharides	Deoxyribose and Deoxynucleoside Catabolism	Na+ dependent nucleoside transporter NupC	<a href=&#39;?page=Annotation&feature=fig|6666666.640627.peg.161&#39; target=_blank>fig|6666666.640627.peg.161</a>	yes	<input type=&#39;button&#39; class=&#39;button&#39; value=&#39;find&#39; onclick=&#39;window.open("?page=SearchGene&fr=Na+ dependent nucleoside transporter NupC&organism=6666666.640629&subsystem=Deoxyribose_and_Deoxynucleoside_Catabolism&template_gene=fig|6666666.640627.peg.161");&#39;>	no
A	Carbohydrates	Monosaccharides	Mannose Metabolism	Mannose-6-phosphate isomerase (EC 5.3.1.8)	<a href=&#39;?page=Annotation&feature=fig|6666666.640627.peg.3620&#39; target=_blank>fig|6666666.640627.peg.3620</a>	yes	<input type=&#39;button&#39; class=&#39;button&#39; value=&#39;find&#39; onclick=&#39;window.open("?page=SearchGene&fr=Mannose-6-phosphate isomerase (EC 5.3.1.8)&organism=6666666.640629&subsystem=Mannose_Metabolism&template_gene=fig|6666666.640627.peg.3620");&#39;>	no
B	Carbohydrates	Monosaccharides	D-Galacturonate and D-Glucuronate Utilization	2-dehydro-3-deoxy-D-gluconate 5-dehydrogenase (EC 1.1.1.127)	<input type=&#39;button&#39; value=&#39;find&#39; onclick=&#39;window.open("?page=SearchGene&fr=2-dehydro-3-deoxy-D-gluconate 5-dehydrogenase (EC 1.1.1.127)&organism=6666666.640627&subsystem=D-Galacturonate_and_D-Glucuronate_Utilization&template_gene=fig|6666666.640629.peg.1115");&#39;>	no	<a href=&#39;?page=Annotation&feature=fig|6666666.640629.peg.1115&#39; target=_blank>fig|6666666.640629.peg.1115</a>, <a href=&#39;?page=Annotation&feature=fig|6666666.640629.peg.2006&#39; target=_blank>fig|6666666.640629.peg.2006</a>, <a href=&#39;?page=Annotation&feature=fig|6666666.640629.peg.2916&#39; target=_blank>fig|6666666.640629.peg.2916</a>	yes
B	Carbohydrates	Monosaccharides	D-Galacturonate and D-Glucuronate Utilization	2-dehydro-3-deoxygluconate kinase (EC 2.7.1.45)	<input type=&#39;button&#39; value=&#39;find&#39; onclick=&#39;window.open("?page=SearchGene&fr=2-dehydro-3-deoxygluconate kinase (EC 2.7.1.45)&organism=6666666.640627&subsystem=D-Galacturonate_and_D-Glucuronate_Utilization&template_gene=fig|6666666.640629.peg.2003");&#39;>	no	<a href=&#39;?page=Annotation&feature=fig|6666666.640629.peg.2003&#39; target=_blank>fig|6666666.640629.peg.2003</a>	yes
B	Carbohydrates	Monosaccharides	D-Galacturonate and D-Glucuronate Utilization	2-deoxy-D-gluconate 3-dehydrogenase (EC 1.1.1.125)	<input type=&#39;button&#39; value=&#39;find&#39; onclick=&#39;window.open("?page=SearchGene&fr=2-deoxy-D-gluconate 3-dehydrogenase (EC 1.1.1.125)&organism=6666666.640627&subsystem=D-Galacturonate_and_D-Glucuronate_Utilization&template_gene=fig|6666666.640629.peg.1115");&#39;>	no	<a href=&#39;?page=Annotation&feature=fig|6666666.640629.peg.1115&#39; target=_blank>fig|6666666.640629.peg.1115</a>, <a href=&#39;?page=Annotation&feature=fig|6666666.640629.peg.2006&#39; target=_blank>fig|6666666.640629.peg.2006</a>, <a href=&#39;?page=Annotation&feature=fig|6666666.640629.peg.2916&#39; target=_blank>fig|6666666.640629.peg.2916</a>	yes
B	Carbohydrates	Monosaccharides	D-Galacturonate and D-Glucuronate Utilization	4-deoxy-L-threo-5-hexosulose-uronate ketol-isomerase (EC 5.3.1.17)	<input type=&#39;button&#39; value=&#39;find&#39; onclick=&#39;window.open("?page=SearchGene&fr=4-deoxy-L-threo-5-hexosulose-uronate ketol-isomerase (EC 5.3.1.17)&organism=6666666.640627&subsystem=D-Galacturonate_and_D-Glucuronate_Utilization&template_gene=fig|6666666.640629.peg.1114");&#39;>	no	<a href=&#39;?page=Annotation&feature=fig|6666666.640629.peg.1114&#39; target=_blank>fig|6666666.640629.peg.1114</a>, <a href=&#39;?page=Annotation&feature=fig|6666666.640629.peg.2005&#39; target=_blank>fig|6666666.640629.peg.2005</a>	yes
B	Carbohydrates	Monosaccharides	D-Galacturonate and D-Glucuronate Utilization	5-dehydro-4-deoxyglucarate dehydratase (EC 4.2.1.41)	<input type=&#39;button&#39; value=&#39;find&#39; onclick=&#39;window.open("?page=SearchGene&fr=5-dehydro-4-deoxyglucarate dehydratase (EC 4.2.1.41)&organism=6666666.640627&subsystem=D-Galacturonate_and_D-Glucuronate_Utilization&template_gene=fig|6666666.640629.peg.1945");&#39;>	no	<a href=&#39;?page=Annotation&feature=fig|6666666.640629.peg.1945&#39; target=_blank>fig|6666666.640629.peg.1945</a>	yes
B	Carbohydrates	Monosaccharides	D-Galacturonate and D-Glucuronate Utilization	Altronate oxidoreductase (EC 1.1.1.58)	<input type=&#39;button&#39; value=&#39;find&#39; onclick=&#39;window.open("?page=SearchGene&fr=Altronate oxidoreductase (EC 1.1.1.58)&organism=6666666.640627&subsystem=D-Galacturonate_and_D-Glucuronate_Utilization&template_gene=fig|6666666.640629.peg.1135");&#39;>	no	<a href=&#39;?page=Annotation&feature=fig|6666666.640629.peg.1135&#39; target=_blank>fig|6666666.640629.peg.1135</a>	yes
B	Carbohydrates	Monosaccharides	D-Galacturonate and D-Glucuronate Utilization	Rhamnogalacturonides degradation protein RhiN	<input type=&#39;button&#39; value=&#39;find&#39; onclick=&#39;window.open("?page=SearchGene&fr=Rhamnogalacturonides degradation protein RhiN&organism=6666666.640627&subsystem=D-Galacturonate_and_D-Glucuronate_Utilization&template_gene=fig|6666666.640629.peg.2012");&#39;>	no	<a href=&#39;?page=Annotation&feature=fig|6666666.640629.peg.2012&#39; target=_blank>fig|6666666.640629.peg.2012</a>	yes
B	Carbohydrates	Monosaccharides	D-Galacturonate and D-Glucuronate Utilization	Uronate isomerase (EC 5.3.1.12)	<input type=&#39;button&#39; value=&#39;find&#39; onclick=&#39;window.open("?page=SearchGene&fr=Uronate isomerase (EC 5.3.1.12)&organism=6666666.640627&subsystem=D-Galacturonate_and_D-Glucuronate_Utilization&template_gene=fig|6666666.640629.peg.1134");&#39;>	no	<a href=&#39;?page=Annotation&feature=fig|6666666.640629.peg.1134&#39; target=_blank>fig|6666666.640629.peg.1134</a>	yes
B	Carbohydrates	Monosaccharides	D-galactarate, D-glucarate and D-glycerate catabolism	D-glycerate transporter (predicted)	<input type=&#39;button&#39; value=&#39;find&#39; onclick=&#39;window.open("?page=SearchGene&fr=D-glycerate transporter (predicted)&organism=6666666.640627&subsystem=D-galactarate,_D-glucarate_and_D-glycerate_catabolism&template_gene=fig|6666666.640629.peg.996");&#39;>	no	<a href=&#39;?page=Annotation&feature=fig|6666666.640629.peg.996&#39; target=_blank>fig|6666666.640629.peg.996</a>	yes
B	Carbohydrates	Monosaccharides	D-galactarate, D-glucarate and D-glycerate catabolism	Glucarate dehydratase (EC 4.2.1.40)	<input type=&#39;button&#39; value=&#39;find&#39; onclick=&#39;window.open("?page=SearchGene&fr=Glucarate dehydratase (EC 4.2.1.40)&organism=6666666.640627&subsystem=D-galactarate,_D-glucarate_and_D-glycerate_catabolism&template_gene=fig|6666666.640629.peg.1940");&#39;>	no	<a href=&#39;?page=Annotation&feature=fig|6666666.640629.peg.1940&#39; target=_blank>fig|6666666.640629.peg.1940</a>	yes
B	Carbohydrates	Monosaccharides	D-galactarate, D-glucarate and D-glycerate catabolism	Predicted 5-dehydro-4-deoxyglucarate regulator YcbG	<input type=&#39;button&#39; value=&#39;find&#39; onclick=&#39;window.open("?page=SearchGene&fr=Predicted 5-dehydro-4-deoxyglucarate regulator YcbG&organism=6666666.640627&subsystem=D-galactarate,_D-glucarate_and_D-glycerate_catabolism&template_gene=fig|6666666.640629.peg.1946");&#39;>	no	<a href=&#39;?page=Annotation&feature=fig|6666666.640629.peg.1946&#39; target=_blank>fig|6666666.640629.peg.1946</a>	yes
B	Carbohydrates	Monosaccharides	D-gluconate and ketogluconates metabolism	Gluconate operon transcriptional repressor	<input type=&#39;button&#39; value=&#39;find&#39; onclick=&#39;window.open("?page=SearchGene&fr=Gluconate operon transcriptional repressor&organism=6666666.640627&subsystem=D-gluconate_and_ketogluconates_metabolism&template_gene=fig|6666666.640629.peg.2037");&#39;>	no	<a href=&#39;?page=Annotation&feature=fig|6666666.640629.peg.2037&#39; target=_blank>fig|6666666.640629.peg.2037</a>	yes
B	Carbohydrates	Monosaccharides	D-gluconate and ketogluconates metabolism	Gluconate permease, Bsu4004 homolog	<input type=&#39;button&#39; value=&#39;find&#39; onclick=&#39;window.open("?page=SearchGene&fr=Gluconate permease, Bsu4004 homolog&organism=6666666.640627&subsystem=D-gluconate_and_ketogluconates_metabolism&template_gene=fig|6666666.640629.peg.2035");&#39;>	no	<a href=&#39;?page=Annotation&feature=fig|6666666.640629.peg.2035&#39; target=_blank>fig|6666666.640629.peg.2035</a>	yes
B	Carbohydrates	Monosaccharides	D-gluconate and ketogluconates metabolism	Low-affinity gluconate/H+ symporter GntU	<input type=&#39;button&#39; value=&#39;find&#39; onclick=&#39;window.open("?page=SearchGene&fr=Low-affinity gluconate/H+ symporter GntU&organism=6666666.640627&subsystem=D-gluconate_and_ketogluconates_metabolism&template_gene=fig|6666666.640629.peg.1182");&#39;>	no	<a href=&#39;?page=Annotation&feature=fig|6666666.640629.peg.1182&#39; target=_blank>fig|6666666.640629.peg.1182</a>	yes
B	Carbohydrates	Monosaccharides	D-ribose utilization	Ribose operon repressor	<input type=&#39;button&#39; value=&#39;find&#39; onclick=&#39;window.open("?page=SearchGene&fr=Ribose operon repressor&organism=6666666.640627&subsystem=D-ribose_utilization&template_gene=fig|6666666.640629.peg.652");&#39;>	no	<a href=&#39;?page=Annotation&feature=fig|6666666.640629.peg.652&#39; target=_blank>fig|6666666.640629.peg.652</a>	yes
B	Carbohydrates	Monosaccharides	Xylose utilization	D-xylose proton-symporter XylE	<input type=&#39;button&#39; value=&#39;find&#39; onclick=&#39;window.open("?page=SearchGene&fr=D-xylose proton-symporter XylE&organism=6666666.640627&subsystem=Xylose_utilization&template_gene=fig|6666666.640629.peg.1014");&#39;>	no	<a href=&#39;?page=Annotation&feature=fig|6666666.640629.peg.1014&#39; target=_blank>fig|6666666.640629.peg.1014</a>	yes
B	Carbohydrates	Monosaccharides	Xylose utilization	Xylose isomerase (EC 5.3.1.5)	<input type=&#39;button&#39; value=&#39;find&#39; onclick=&#39;window.open("?page=SearchGene&fr=Xylose isomerase (EC 5.3.1.5)&organism=6666666.640627&subsystem=Xylose_utilization&template_gene=fig|6666666.640629.peg.1010");&#39;>	no	<a href=&#39;?page=Annotation&feature=fig|6666666.640629.peg.1010&#39; target=_blank>fig|6666666.640629.peg.1010</a>	yes
B	Carbohydrates	Monosaccharides	Xylose utilization	Xylose-responsive transcription regulator, ROK family	<input type=&#39;button&#39; value=&#39;find&#39; onclick=&#39;window.open("?page=SearchGene&fr=Xylose-responsive transcription regulator, ROK family&organism=6666666.640627&subsystem=Xylose_utilization&template_gene=fig|6666666.640629.peg.1011");&#39;>	no	<a href=&#39;?page=Annotation&feature=fig|6666666.640629.peg.1011&#39; target=_blank>fig|6666666.640629.peg.1011</a>, <a href=&#39;?page=Annotation&feature=fig|6666666.640629.peg.1013&#39; target=_blank>fig|6666666.640629.peg.1013</a>	yes
B	Carbohydrates	Monosaccharides	Xylose utilization	Xylulose kinase (EC 2.7.1.17)	<input type=&#39;button&#39; value=&#39;find&#39; onclick=&#39;window.open("?page=SearchGene&fr=Xylulose kinase (EC 2.7.1.17)&organism=6666666.640627&subsystem=Xylose_utilization&template_gene=fig|6666666.640629.peg.1009");&#39;>	no	<a href=&#39;?page=Annotation&feature=fig|6666666.640629.peg.1009&#39; target=_blank>fig|6666666.640629.peg.1009</a>	yes
A and B	Carbohydrates	One-carbon Metabolism	One-carbon metabolism by tetrahydropterines	5,10-methylenetetrahydrofolate reductase (EC 1.5.1.20)	<a href=&#39;?page=Annotation&feature=fig|6666666.640627.peg.1020&#39; target=_blank>fig|6666666.640627.peg.1020</a>	yes	<a href=&#39;?page=Annotation&feature=fig|6666666.640629.peg.3974&#39; target=_blank>fig|6666666.640629.peg.3974</a>	yes
A and B	Carbohydrates	One-carbon Metabolism	One-carbon metabolism by tetrahydropterines	5-formyltetrahydrofolate cyclo-ligase (EC 6.3.3.2)	<a href=&#39;?page=Annotation&feature=fig|6666666.640627.peg.1908&#39; target=_blank>fig|6666666.640627.peg.1908</a>	yes	<a href=&#39;?page=Annotation&feature=fig|6666666.640629.peg.320&#39; target=_blank>fig|6666666.640629.peg.320</a>	yes
A and B	Carbohydrates	One-carbon Metabolism	One-carbon metabolism by tetrahydropterines	Formyltetrahydrofolate deformylase (EC 3.5.1.10)	<a href=&#39;?page=Annotation&feature=fig|6666666.640627.peg.4025&#39; target=_blank>fig|6666666.640627.peg.4025</a>	yes	<a href=&#39;?page=Annotation&feature=fig|6666666.640629.peg.3266&#39; target=_blank>fig|6666666.640629.peg.3266</a>	yes
A and B	Carbohydrates	One-carbon Metabolism	One-carbon metabolism by tetrahydropterines	Methenyltetrahydrofolate cyclohydrolase (EC 3.5.4.9)	<a href=&#39;?page=Annotation&feature=fig|6666666.640627.peg.1859&#39; target=_blank>fig|6666666.640627.peg.1859</a>	yes	<a href=&#39;?page=Annotation&feature=fig|6666666.640629.peg.373&#39; target=_blank>fig|6666666.640629.peg.373</a>	yes
A and B	Carbohydrates	One-carbon Metabolism	One-carbon metabolism by tetrahydropterines	Methylenetetrahydrofolate dehydrogenase (NADP+) (EC 1.5.1.5)	<a href=&#39;?page=Annotation&feature=fig|6666666.640627.peg.1859&#39; target=_blank>fig|6666666.640627.peg.1859</a>	yes	<a href=&#39;?page=Annotation&feature=fig|6666666.640629.peg.373&#39; target=_blank>fig|6666666.640629.peg.373</a>	yes
A	Carbohydrates	One-carbon Metabolism	Formaldehyde assimilation: Ribulose monophosphate pathway	6-phospho-3-hexuloisomerase	<a href=&#39;?page=Annotation&feature=fig|6666666.640627.peg.28&#39; target=_blank>fig|6666666.640627.peg.28</a>	yes	<input type=&#39;button&#39; class=&#39;button&#39; value=&#39;find&#39; onclick=&#39;window.open("?page=SearchGene&fr=6-phospho-3-hexuloisomerase&organism=6666666.640629&subsystem=Formaldehyde_assimilation:_Ribulose_monophosphate_pathway&template_gene=fig|6666666.640627.peg.28");&#39;>	no
A and B	Carbohydrates	Organic acids	Glycerate metabolism	2-hydroxy-3-oxopropionate reductase (EC 1.1.1.60)	<a href=&#39;?page=Annotation&feature=fig|6666666.640627.peg.3796&#39; target=_blank>fig|6666666.640627.peg.3796</a>	yes	<a href=&#39;?page=Annotation&feature=fig|6666666.640629.peg.3592&#39; target=_blank>fig|6666666.640629.peg.3592</a>	yes
A and B	Carbohydrates	Organic acids	Glycerate metabolism	Glycerate kinase (EC 2.7.1.31)	<a href=&#39;?page=Annotation&feature=fig|6666666.640627.peg.20&#39; target=_blank>fig|6666666.640627.peg.20</a>	yes	<a href=&#39;?page=Annotation&feature=fig|6666666.640629.peg.995&#39; target=_blank>fig|6666666.640629.peg.995</a>, <a href=&#39;?page=Annotation&feature=fig|6666666.640629.peg.4094&#39; target=_blank>fig|6666666.640629.peg.4094</a>	yes
A and B	Carbohydrates	Organic acids	Glycerate metabolism	Hydroxypyruvate reductase (EC 1.1.1.81)	<a href=&#39;?page=Annotation&feature=fig|6666666.640627.peg.2351&#39; target=_blank>fig|6666666.640627.peg.2351</a>	yes	<a href=&#39;?page=Annotation&feature=fig|6666666.640629.peg.730&#39; target=_blank>fig|6666666.640629.peg.730</a>, <a href=&#39;?page=Annotation&feature=fig|6666666.640629.peg.1035&#39; target=_blank>fig|6666666.640629.peg.1035</a>	yes
A and B	Carbohydrates	Organic acids	Glycerate metabolism	Pyruvate kinase (EC 2.7.1.40)	<a href=&#39;?page=Annotation&feature=fig|6666666.640627.peg.2215&#39; target=_blank>fig|6666666.640627.peg.2215</a>	yes	<a href=&#39;?page=Annotation&feature=fig|6666666.640629.peg.79&#39; target=_blank>fig|6666666.640629.peg.79</a>	yes
A and B	Carbohydrates	Organic acids	Glycerate metabolism	Serine--glyoxylate aminotransferase (EC 2.6.1.45)	<a href=&#39;?page=Annotation&feature=fig|6666666.640627.peg.3762&#39; target=_blank>fig|6666666.640627.peg.3762</a>	yes	<a href=&#39;?page=Annotation&feature=fig|6666666.640629.peg.2885&#39; target=_blank>fig|6666666.640629.peg.2885</a>	yes
A and B	Carbohydrates	Organic acids	Methylcitrate cycle	2-methylcitrate dehydratase (EC 4.2.1.79)	<a href=&#39;?page=Annotation&feature=fig|6666666.640627.peg.529&#39; target=_blank>fig|6666666.640627.peg.529</a>	yes	<a href=&#39;?page=Annotation&feature=fig|6666666.640629.peg.3578&#39; target=_blank>fig|6666666.640629.peg.3578</a>	yes
A and B	Carbohydrates	Organic acids	Methylcitrate cycle	2-methylcitrate synthase (EC 2.3.3.5)	<a href=&#39;?page=Annotation&feature=fig|6666666.640627.peg.530&#39; target=_blank>fig|6666666.640627.peg.530</a>	yes	<a href=&#39;?page=Annotation&feature=fig|6666666.640629.peg.3579&#39; target=_blank>fig|6666666.640629.peg.3579</a>	yes
A and B	Carbohydrates	Organic acids	Methylcitrate cycle	Methylisocitrate lyase (EC 4.1.3.30)	<a href=&#39;?page=Annotation&feature=fig|6666666.640627.peg.528&#39; target=_blank>fig|6666666.640627.peg.528</a>	yes	<a href=&#39;?page=Annotation&feature=fig|6666666.640629.peg.3577&#39; target=_blank>fig|6666666.640629.peg.3577</a>	yes
A	Carbohydrates	Organic acids	CitAB	Transcriptional regulatory protein CitB, DpiA	<a href=&#39;?page=Annotation&feature=fig|6666666.640627.peg.664&#39; target=_blank>fig|6666666.640627.peg.664</a>	yes	<input type=&#39;button&#39; class=&#39;button&#39; value=&#39;find&#39; onclick=&#39;window.open("?page=SearchGene&fr=Transcriptional regulatory protein CitB, DpiA&organism=6666666.640629&subsystem=CitAB&template_gene=fig|6666666.640627.peg.664");&#39;>	no
A	Carbohydrates	Organic acids	Methylcitrate cycle	2-methylisocitrate dehydratase (EC 4.2.1.99)	<a href=&#39;?page=Annotation&feature=fig|6666666.640627.peg.4389&#39; target=_blank>fig|6666666.640627.peg.4389</a>	yes	<input type=&#39;button&#39; class=&#39;button&#39; value=&#39;find&#39; onclick=&#39;window.open("?page=SearchGene&fr=2-methylisocitrate dehydratase (EC 4.2.1.99)&organism=6666666.640629&subsystem=Methylcitrate_cycle&template_gene=fig|6666666.640627.peg.4389");&#39;>	no
B	Carbohydrates	Polysaccharides	Glycogen metabolism	1,4-alpha-glucan (glycogen) branching enzyme, GH-13-type (EC 2.4.1.18)	<input type=&#39;button&#39; value=&#39;find&#39; onclick=&#39;window.open("?page=SearchGene&fr=1,4-alpha-glucan (glycogen) branching enzyme, GH-13-type (EC 2.4.1.18)&organism=6666666.640627&subsystem=Glycogen_metabolism&template_gene=fig|6666666.640629.peg.2753");&#39;>	no	<a href=&#39;?page=Annotation&feature=fig|6666666.640629.peg.2753&#39; target=_blank>fig|6666666.640629.peg.2753</a>	yes
B	Carbohydrates	Polysaccharides	Glycogen metabolism	4-alpha-glucanotransferase (amylomaltase) (EC 2.4.1.25)	<input type=&#39;button&#39; value=&#39;find&#39; onclick=&#39;window.open("?page=SearchGene&fr=4-alpha-glucanotransferase (amylomaltase) (EC 2.4.1.25)&organism=6666666.640627&subsystem=Glycogen_metabolism&template_gene=fig|6666666.640629.peg.2748");&#39;>	no	<a href=&#39;?page=Annotation&feature=fig|6666666.640629.peg.2748&#39; target=_blank>fig|6666666.640629.peg.2748</a>	yes
B	Carbohydrates	Polysaccharides	Glycogen metabolism	Glucose-1-phosphate adenylyltransferase (EC 2.7.7.27)	<input type=&#39;button&#39; value=&#39;find&#39; onclick=&#39;window.open("?page=SearchGene&fr=Glucose-1-phosphate adenylyltransferase (EC 2.7.7.27)&organism=6666666.640627&subsystem=Glycogen_metabolism&template_gene=fig|6666666.640629.peg.2752");&#39;>	no	<a href=&#39;?page=Annotation&feature=fig|6666666.640629.peg.2752&#39; target=_blank>fig|6666666.640629.peg.2752</a>	yes
B	Carbohydrates	Polysaccharides	Glycogen metabolism	Glycogen biosynthesis protein GlgD, glucose-1-phosphate adenylyltransferase family	<input type=&#39;button&#39; value=&#39;find&#39; onclick=&#39;window.open("?page=SearchGene&fr=Glycogen biosynthesis protein GlgD, glucose-1-phosphate adenylyltransferase family&organism=6666666.640627&subsystem=Glycogen_metabolism&template_gene=fig|6666666.640629.peg.2751");&#39;>	no	<a href=&#39;?page=Annotation&feature=fig|6666666.640629.peg.2751&#39; target=_blank>fig|6666666.640629.peg.2751</a>	yes
B	Carbohydrates	Polysaccharides	Glycogen metabolism	Glycogen phosphorylase (EC 2.4.1.1)	<input type=&#39;button&#39; value=&#39;find&#39; onclick=&#39;window.open("?page=SearchGene&fr=Glycogen phosphorylase (EC 2.4.1.1)&organism=6666666.640627&subsystem=Glycogen_metabolism&template_gene=fig|6666666.640629.peg.2749");&#39;>	no	<a href=&#39;?page=Annotation&feature=fig|6666666.640629.peg.2749&#39; target=_blank>fig|6666666.640629.peg.2749</a>	yes
B	Carbohydrates	Polysaccharides	Glycogen metabolism	Glycogen synthase, ADP-glucose transglucosylase (EC 2.4.1.21)	<input type=&#39;button&#39; value=&#39;find&#39; onclick=&#39;window.open("?page=SearchGene&fr=Glycogen synthase, ADP-glucose transglucosylase (EC 2.4.1.21)&organism=6666666.640627&subsystem=Glycogen_metabolism&template_gene=fig|6666666.640629.peg.2750");&#39;>	no	<a href=&#39;?page=Annotation&feature=fig|6666666.640629.peg.2750&#39; target=_blank>fig|6666666.640629.peg.2750</a>	yes
A and B	Carbohydrates	Sugar alcohols	Glycerol and Glycerol-3-phosphate Uptake and Utilization	Aerobic glycerol-3-phosphate dehydrogenase (EC 1.1.5.3)	<a href=&#39;?page=Annotation&feature=fig|6666666.640627.peg.2487&#39; target=_blank>fig|6666666.640627.peg.2487</a>	yes	<a href=&#39;?page=Annotation&feature=fig|6666666.640629.peg.883&#39; target=_blank>fig|6666666.640629.peg.883</a>	yes
A and B	Carbohydrates	Sugar alcohols	Glycerol and Glycerol-3-phosphate Uptake and Utilization	Glycerol kinase (EC 2.7.1.30)	<a href=&#39;?page=Annotation&feature=fig|6666666.640627.peg.670&#39; target=_blank>fig|6666666.640627.peg.670</a>, <a href=&#39;?page=Annotation&feature=fig|6666666.640627.peg.2488&#39; target=_blank>fig|6666666.640627.peg.2488</a>	yes	<a href=&#39;?page=Annotation&feature=fig|6666666.640629.peg.884&#39; target=_blank>fig|6666666.640629.peg.884</a>, <a href=&#39;?page=Annotation&feature=fig|6666666.640629.peg.1038&#39; target=_blank>fig|6666666.640629.peg.1038</a>	yes
A and B	Carbohydrates	Sugar alcohols	Glycerol and Glycerol-3-phosphate Uptake and Utilization	Glycerol uptake facilitator protein	<a href=&#39;?page=Annotation&feature=fig|6666666.640627.peg.671&#39; target=_blank>fig|6666666.640627.peg.671</a>, <a href=&#39;?page=Annotation&feature=fig|6666666.640627.peg.2489&#39; target=_blank>fig|6666666.640627.peg.2489</a>	yes	<a href=&#39;?page=Annotation&feature=fig|6666666.640629.peg.885&#39; target=_blank>fig|6666666.640629.peg.885</a>, <a href=&#39;?page=Annotation&feature=fig|6666666.640629.peg.1039&#39; target=_blank>fig|6666666.640629.peg.1039</a>	yes
A and B	Carbohydrates	Sugar alcohols	Glycerol and Glycerol-3-phosphate Uptake and Utilization	Glycerol-3-phosphate dehydrogenase [NAD(P)+] (EC 1.1.1.94)	<a href=&#39;?page=Annotation&feature=fig|6666666.640627.peg.1758&#39; target=_blank>fig|6666666.640627.peg.1758</a>	yes	<a href=&#39;?page=Annotation&feature=fig|6666666.640629.peg.2515&#39; target=_blank>fig|6666666.640629.peg.2515</a>	yes
A and B	Carbohydrates	Sugar alcohols	Glycerol and Glycerol-3-phosphate Uptake and Utilization	Glycerol-3-phosphate responsive antiterminator (mRNA-binding)	<a href=&#39;?page=Annotation&feature=fig|6666666.640627.peg.2490&#39; target=_blank>fig|6666666.640627.peg.2490</a>	yes	<a href=&#39;?page=Annotation&feature=fig|6666666.640629.peg.886&#39; target=_blank>fig|6666666.640629.peg.886</a>	yes
A and B	Carbohydrates	Sugar alcohols	Glycerol and Glycerol-3-phosphate Uptake and Utilization	Glycerophosphoryl diester phosphodiesterase (EC 3.1.4.46)	<a href=&#39;?page=Annotation&feature=fig|6666666.640627.peg.375&#39; target=_blank>fig|6666666.640627.peg.375</a>, <a href=&#39;?page=Annotation&feature=fig|6666666.640627.peg.1298&#39; target=_blank>fig|6666666.640627.peg.1298</a>, <a href=&#39;?page=Annotation&feature=fig|6666666.640627.peg.1829&#39; target=_blank>fig|6666666.640627.peg.1829</a>	yes	<a href=&#39;?page=Annotation&feature=fig|6666666.640629.peg.415&#39; target=_blank>fig|6666666.640629.peg.415</a>, <a href=&#39;?page=Annotation&feature=fig|6666666.640629.peg.3562&#39; target=_blank>fig|6666666.640629.peg.3562</a>	yes
A	Carbohydrates	Sugar alcohols	Glycerol and Glycerol-3-phosphate Uptake and Utilization	Glycerol-3-phosphate transporter	<a href=&#39;?page=Annotation&feature=fig|6666666.640627.peg.1395&#39; target=_blank>fig|6666666.640627.peg.1395</a>	yes	<input type=&#39;button&#39; class=&#39;button&#39; value=&#39;find&#39; onclick=&#39;window.open("?page=SearchGene&fr=Glycerol-3-phosphate transporter&organism=6666666.640629&subsystem=Glycerol_and_Glycerol-3-phosphate_Uptake_and_Utilization&template_gene=fig|6666666.640627.peg.1395");&#39;>	no
B	Carbohydrates	Sugar alcohols	Inositol catabolism	Glyceraldehyde-3-phosphate ketol-isomerase (EC 5.3.1.1)	<input type=&#39;button&#39; value=&#39;find&#39; onclick=&#39;window.open("?page=SearchGene&fr=Glyceraldehyde-3-phosphate ketol-isomerase (EC 5.3.1.1)&organism=6666666.640627&subsystem=Inositol_catabolism&template_gene=fig|6666666.640629.peg.1965");&#39;>	no	<a href=&#39;?page=Annotation&feature=fig|6666666.640629.peg.1965&#39; target=_blank>fig|6666666.640629.peg.1965</a>	yes
B	Carbohydrates	Sugar alcohols	Inositol catabolism	Major myo-inositol transporter IolT	<input type=&#39;button&#39; value=&#39;find&#39; onclick=&#39;window.open("?page=SearchGene&fr=Major myo-inositol transporter IolT&organism=6666666.640627&subsystem=Inositol_catabolism&template_gene=fig|6666666.640629.peg.1967");&#39;>	no	<a href=&#39;?page=Annotation&feature=fig|6666666.640629.peg.1967&#39; target=_blank>fig|6666666.640629.peg.1967</a>	yes
A and B	Carbohydrates	no subcategory	Carbon storage regulator	Carbon storage regulator	<a href=&#39;?page=Annotation&feature=fig|6666666.640627.peg.2932&#39; target=_blank>fig|6666666.640627.peg.2932</a>	yes	<a href=&#39;?page=Annotation&feature=fig|6666666.640629.peg.929&#39; target=_blank>fig|6666666.640629.peg.929</a>	yes
A and B	Carbohydrates	no subcategory	Carbon storage regulator	Flagellar assembly factor FliW	<a href=&#39;?page=Annotation&feature=fig|6666666.640627.peg.2933&#39; target=_blank>fig|6666666.640627.peg.2933</a>	yes	<a href=&#39;?page=Annotation&feature=fig|6666666.640629.peg.930&#39; target=_blank>fig|6666666.640629.peg.930</a>	yes
A and B	Cell Division and Cell Cycle	Checkpoint control	Bacterial checkpoint-control-related cluster	Bacterial checkpoint controller DisA with nucleotide-binding domain	<a href=&#39;?page=Annotation&feature=fig|6666666.640627.peg.272&#39; target=_blank>fig|6666666.640627.peg.272</a>, <a href=&#39;?page=Annotation&feature=fig|6666666.640627.peg.2527&#39; target=_blank>fig|6666666.640627.peg.2527</a>	yes	<a href=&#39;?page=Annotation&feature=fig|6666666.640629.peg.3918&#39; target=_blank>fig|6666666.640629.peg.3918</a>	yes
A and B	Cell Division and Cell Cycle	Checkpoint control	Bacterial checkpoint-control-related cluster	Diadenylate cyclase spyDAC	<a href=&#39;?page=Annotation&feature=fig|6666666.640627.peg.272&#39; target=_blank>fig|6666666.640627.peg.272</a>, <a href=&#39;?page=Annotation&feature=fig|6666666.640627.peg.2527&#39; target=_blank>fig|6666666.640627.peg.2527</a>	yes	<a href=&#39;?page=Annotation&feature=fig|6666666.640629.peg.3918&#39; target=_blank>fig|6666666.640629.peg.3918</a>	yes
A and B	Cell Division and Cell Cycle	Checkpoint control	Bacterial checkpoint-control-related cluster	Phosphoglucosamine mutase (EC 5.4.2.10)	<a href=&#39;?page=Annotation&feature=fig|6666666.640627.peg.274&#39; target=_blank>fig|6666666.640627.peg.274</a>	yes	<a href=&#39;?page=Annotation&feature=fig|6666666.640629.peg.3920&#39; target=_blank>fig|6666666.640629.peg.3920</a>	yes
A	Cell Division and Cell Cycle	Checkpoint control	Bacterial checkpoint-control-related cluster	Uncharacterized secreted protein associated with spyDAC	<a href=&#39;?page=Annotation&feature=fig|6666666.640627.peg.273&#39; target=_blank>fig|6666666.640627.peg.273</a>	yes	<input type=&#39;button&#39; class=&#39;button&#39; value=&#39;find&#39; onclick=&#39;window.open("?page=SearchGene&fr=Uncharacterized secreted protein associated with spyDAC&organism=6666666.640629&subsystem=Bacterial_checkpoint-control-related_cluster&template_gene=fig|6666666.640627.peg.273");&#39;>	no
A and B	Cell Wall and Capsule	Capsular and extracellular polysacchrides	CMP-N-acetylneuraminate Biosynthesis	N-acetylneuraminate synthase (EC 2.5.1.56)	<a href=&#39;?page=Annotation&feature=fig|6666666.640627.peg.494&#39; target=_blank>fig|6666666.640627.peg.494</a>	yes	<a href=&#39;?page=Annotation&feature=fig|6666666.640629.peg.1828&#39; target=_blank>fig|6666666.640629.peg.1828</a>	yes
A and B	Cell Wall and Capsule	Capsular and extracellular polysacchrides	CMP-N-acetylneuraminate Biosynthesis	UDP-N-acetylglucosamine 2-epimerase (EC 5.1.3.14)	<a href=&#39;?page=Annotation&feature=fig|6666666.640627.peg.2626&#39; target=_blank>fig|6666666.640627.peg.2626</a>	yes	<a href=&#39;?page=Annotation&feature=fig|6666666.640629.peg.3023&#39; target=_blank>fig|6666666.640629.peg.3023</a>, <a href=&#39;?page=Annotation&feature=fig|6666666.640629.peg.3171&#39; target=_blank>fig|6666666.640629.peg.3171</a>	yes
A	Cell Wall and Capsule	Capsular and extracellular polysacchrides	CMP-N-acetylneuraminate Biosynthesis	N-Acetylneuraminate cytidylyltransferase (EC 2.7.7.43)	<a href=&#39;?page=Annotation&feature=fig|6666666.640627.peg.496&#39; target=_blank>fig|6666666.640627.peg.496</a>	yes	<input type=&#39;button&#39; class=&#39;button&#39; value=&#39;find&#39; onclick=&#39;window.open("?page=SearchGene&fr=N-Acetylneuraminate cytidylyltransferase (EC 2.7.7.43)&organism=6666666.640629&subsystem=CMP-N-acetylneuraminate_Biosynthesis&template_gene=fig|6666666.640627.peg.496");&#39;>	no
A	Cell Wall and Capsule	Capsular and extracellular polysacchrides	Rhamnose containing glycans	Glucose-1-phosphate thymidylyltransferase (EC 2.7.7.24)	<a href=&#39;?page=Annotation&feature=fig|6666666.640627.peg.685&#39; target=_blank>fig|6666666.640627.peg.685</a>	yes	<input type=&#39;button&#39; class=&#39;button&#39; value=&#39;find&#39; onclick=&#39;window.open("?page=SearchGene&fr=Glucose-1-phosphate thymidylyltransferase (EC 2.7.7.24)&organism=6666666.640629&subsystem=Rhamnose_containing_glycans&template_gene=fig|6666666.640627.peg.685");&#39;>	no
A	Cell Wall and Capsule	Capsular and extracellular polysacchrides	Rhamnose containing glycans	Glycerol-3-phosphate cytidylyltransferase (EC 2.7.7.39)	<a href=&#39;?page=Annotation&feature=fig|6666666.640627.peg.591&#39; target=_blank>fig|6666666.640627.peg.591</a>	yes	<input type=&#39;button&#39; class=&#39;button&#39; value=&#39;find&#39; onclick=&#39;window.open("?page=SearchGene&fr=Glycerol-3-phosphate cytidylyltransferase (EC 2.7.7.39)&organism=6666666.640629&subsystem=Rhamnose_containing_glycans&template_gene=fig|6666666.640627.peg.591");&#39;>	no
A	Cell Wall and Capsule	Capsular and extracellular polysacchrides	Rhamnose containing glycans	capsular polysaccharide biosynthesis protein	<a href=&#39;?page=Annotation&feature=fig|6666666.640627.peg.1100&#39; target=_blank>fig|6666666.640627.peg.1100</a>, <a href=&#39;?page=Annotation&feature=fig|6666666.640627.peg.1102&#39; target=_blank>fig|6666666.640627.peg.1102</a>, <a href=&#39;?page=Annotation&feature=fig|6666666.640627.peg.1109&#39; target=_blank>fig|6666666.640627.peg.1109</a>	yes	<input type=&#39;button&#39; class=&#39;button&#39; value=&#39;find&#39; onclick=&#39;window.open("?page=SearchGene&fr=capsular polysaccharide biosynthesis protein&organism=6666666.640629&subsystem=Rhamnose_containing_glycans&template_gene=fig|6666666.640627.peg.1100");&#39;>	no
A	Cell Wall and Capsule	Capsular and extracellular polysacchrides	Rhamnose containing glycans	dTDP-4-dehydrorhamnose reductase (EC 1.1.1.133)	<a href=&#39;?page=Annotation&feature=fig|6666666.640627.peg.2688&#39; target=_blank>fig|6666666.640627.peg.2688</a>	yes	<input type=&#39;button&#39; class=&#39;button&#39; value=&#39;find&#39; onclick=&#39;window.open("?page=SearchGene&fr=dTDP-4-dehydrorhamnose reductase (EC 1.1.1.133)&organism=6666666.640629&subsystem=Rhamnose_containing_glycans&template_gene=fig|6666666.640627.peg.2688");&#39;>	no
A	Cell Wall and Capsule	Capsular and extracellular polysacchrides	Rhamnose containing glycans	dTDP-glucose 4,6-dehydratase (EC 4.2.1.46)	<a href=&#39;?page=Annotation&feature=fig|6666666.640627.peg.686&#39; target=_blank>fig|6666666.640627.peg.686</a>	yes	<input type=&#39;button&#39; class=&#39;button&#39; value=&#39;find&#39; onclick=&#39;window.open("?page=SearchGene&fr=dTDP-glucose 4,6-dehydratase (EC 4.2.1.46)&organism=6666666.640629&subsystem=Rhamnose_containing_glycans&template_gene=fig|6666666.640627.peg.686");&#39;>	no
A	Cell Wall and Capsule	Capsular and extracellular polysacchrides	Sialic Acid Metabolism	Glucosamine--fructose-6-phosphate aminotransferase [isomerizing] (EC 2.6.1.16)	<a href=&#39;?page=Annotation&feature=fig|6666666.640627.peg.4020&#39; target=_blank>fig|6666666.640627.peg.4020</a>	yes	<input type=&#39;button&#39; class=&#39;button&#39; value=&#39;find&#39; onclick=&#39;window.open("?page=SearchGene&fr=Glucosamine--fructose-6-phosphate aminotransferase [isomerizing] (EC 2.6.1.16)&organism=6666666.640629&subsystem=Sialic_Acid_Metabolism&template_gene=fig|6666666.640627.peg.4020");&#39;>	no
A	Cell Wall and Capsule	Capsular and extracellular polysacchrides	Sialic Acid Metabolism	N-acetylmannosamine kinase (EC 2.7.1.60)	<a href=&#39;?page=Annotation&feature=fig|6666666.640627.peg.2378&#39; target=_blank>fig|6666666.640627.peg.2378</a>, <a href=&#39;?page=Annotation&feature=fig|6666666.640627.peg.3618&#39; target=_blank>fig|6666666.640627.peg.3618</a>	yes	<input type=&#39;button&#39; class=&#39;button&#39; value=&#39;find&#39; onclick=&#39;window.open("?page=SearchGene&fr=N-acetylmannosamine kinase (EC 2.7.1.60)&organism=6666666.640629&subsystem=Sialic_Acid_Metabolism&template_gene=fig|6666666.640627.peg.2378");&#39;>	no
A	Cell Wall and Capsule	Capsular and extracellular polysacchrides	Sialic Acid Metabolism	N-acetylmannosamine-6-phosphate 2-epimerase (EC 5.1.3.9)	<a href=&#39;?page=Annotation&feature=fig|6666666.640627.peg.675&#39; target=_blank>fig|6666666.640627.peg.675</a>	yes	<input type=&#39;button&#39; class=&#39;button&#39; value=&#39;find&#39; onclick=&#39;window.open("?page=SearchGene&fr=N-acetylmannosamine-6-phosphate 2-epimerase (EC 5.1.3.9)&organism=6666666.640629&subsystem=Sialic_Acid_Metabolism&template_gene=fig|6666666.640627.peg.675");&#39;>	no
B	Cell Wall and Capsule	Capsular and extracellular polysacchrides	Polysaccharide deacetylases	Peptidoglycan N-acetylglucosamine deacetylase (EC 3.5.1.-)	<input type=&#39;button&#39; value=&#39;find&#39; onclick=&#39;window.open("?page=SearchGene&fr=Peptidoglycan N-acetylglucosamine deacetylase (EC 3.5.1.-)&organism=6666666.640627&subsystem=Polysaccharide_deacetylases&template_gene=fig|6666666.640629.peg.438");&#39;>	no	<a href=&#39;?page=Annotation&feature=fig|6666666.640629.peg.438&#39; target=_blank>fig|6666666.640629.peg.438</a>	yes
A and B	Cell Wall and Capsule	Gram-Positive cell wall components	Polyglycerolphosphate lipoteichoic acid biosynthesis	Lipoteichoic acid synthase LtaS Type IIIa	<a href=&#39;?page=Annotation&feature=fig|6666666.640627.peg.1900&#39; target=_blank>fig|6666666.640627.peg.1900</a>	yes	<a href=&#39;?page=Annotation&feature=fig|6666666.640629.peg.328&#39; target=_blank>fig|6666666.640629.peg.328</a>, <a href=&#39;?page=Annotation&feature=fig|6666666.640629.peg.1883&#39; target=_blank>fig|6666666.640629.peg.1883</a>, <a href=&#39;?page=Annotation&feature=fig|6666666.640629.peg.4210&#39; target=_blank>fig|6666666.640629.peg.4210</a>	yes
A and B	Cell Wall and Capsule	Gram-Positive cell wall components	Sortase	Sortase A, LPXTG specific	<a href=&#39;?page=Annotation&feature=fig|6666666.640627.peg.557&#39; target=_blank>fig|6666666.640627.peg.557</a>, <a href=&#39;?page=Annotation&feature=fig|6666666.640627.peg.902&#39; target=_blank>fig|6666666.640627.peg.902</a>, <a href=&#39;?page=Annotation&feature=fig|6666666.640627.peg.3307&#39; target=_blank>fig|6666666.640627.peg.3307</a>	yes	<a href=&#39;?page=Annotation&feature=fig|6666666.640629.peg.1000&#39; target=_blank>fig|6666666.640629.peg.1000</a>	yes
A	Cell Wall and Capsule	Gram-Positive cell wall components	D-Alanyl Lipoteichoic Acid Biosynthesis	D-alanine--poly(phosphoribitol) ligase subunit 1 (EC 6.1.1.13)	<a href=&#39;?page=Annotation&feature=fig|6666666.640627.peg.3606&#39; target=_blank>fig|6666666.640627.peg.3606</a>	yes	<input type=&#39;button&#39; class=&#39;button&#39; value=&#39;find&#39; onclick=&#39;window.open("?page=SearchGene&fr=D-alanine--poly(phosphoribitol) ligase subunit 1 (EC 6.1.1.13)&organism=6666666.640629&subsystem=D-Alanyl_Lipoteichoic_Acid_Biosynthesis&template_gene=fig|6666666.640627.peg.3606");&#39;>	no
A	Cell Wall and Capsule	Gram-Positive cell wall components	D-Alanyl Lipoteichoic Acid Biosynthesis	D-alanine--poly(phosphoribitol) ligase subunit 2 (EC 6.1.1.13)	<a href=&#39;?page=Annotation&feature=fig|6666666.640627.peg.3608&#39; target=_blank>fig|6666666.640627.peg.3608</a>	yes	<input type=&#39;button&#39; class=&#39;button&#39; value=&#39;find&#39; onclick=&#39;window.open("?page=SearchGene&fr=D-alanine--poly(phosphoribitol) ligase subunit 2 (EC 6.1.1.13)&organism=6666666.640629&subsystem=D-Alanyl_Lipoteichoic_Acid_Biosynthesis&template_gene=fig|6666666.640627.peg.3608");&#39;>	no
A	Cell Wall and Capsule	Gram-Positive cell wall components	D-Alanyl Lipoteichoic Acid Biosynthesis	D-alanyl transfer protein DltB	<a href=&#39;?page=Annotation&feature=fig|6666666.640627.peg.3607&#39; target=_blank>fig|6666666.640627.peg.3607</a>	yes	<input type=&#39;button&#39; class=&#39;button&#39; value=&#39;find&#39; onclick=&#39;window.open("?page=SearchGene&fr=D-alanyl transfer protein DltB&organism=6666666.640629&subsystem=D-Alanyl_Lipoteichoic_Acid_Biosynthesis&template_gene=fig|6666666.640627.peg.3607");&#39;>	no
A	Cell Wall and Capsule	Gram-Positive cell wall components	D-Alanyl Lipoteichoic Acid Biosynthesis	Poly(glycerophosphate chain) D-alanine transfer protein DltD	<a href=&#39;?page=Annotation&feature=fig|6666666.640627.peg.3609&#39; target=_blank>fig|6666666.640627.peg.3609</a>	yes	<input type=&#39;button&#39; class=&#39;button&#39; value=&#39;find&#39; onclick=&#39;window.open("?page=SearchGene&fr=Poly(glycerophosphate chain) D-alanine transfer protein DltD&organism=6666666.640629&subsystem=D-Alanyl_Lipoteichoic_Acid_Biosynthesis&template_gene=fig|6666666.640627.peg.3609");&#39;>	no
A	Cell Wall and Capsule	Gram-Positive cell wall components	Polyglycerolphosphate lipoteichoic acid biosynthesis	Lipoteichoic acid synthase LtaS Type Ia	<a href=&#39;?page=Annotation&feature=fig|6666666.640627.peg.488&#39; target=_blank>fig|6666666.640627.peg.488</a>	yes	<input type=&#39;button&#39; class=&#39;button&#39; value=&#39;find&#39; onclick=&#39;window.open("?page=SearchGene&fr=Lipoteichoic acid synthase LtaS Type Ia&organism=6666666.640629&subsystem=Polyglycerolphosphate_lipoteichoic_acid_biosynthesis&template_gene=fig|6666666.640627.peg.488");&#39;>	no
A and B	Cell Wall and Capsule	no subcategory	Murein Hydrolases	D-alanyl-D-alanine carboxypeptidase (EC 3.4.16.4)	<a href=&#39;?page=Annotation&feature=fig|6666666.640627.peg.716&#39; target=_blank>fig|6666666.640627.peg.716</a>, <a href=&#39;?page=Annotation&feature=fig|6666666.640627.peg.1794&#39; target=_blank>fig|6666666.640627.peg.1794</a>, <a href=&#39;?page=Annotation&feature=fig|6666666.640627.peg.1814&#39; target=_blank>fig|6666666.640627.peg.1814</a>, <a href=&#39;?page=Annotation&feature=fig|66666…	yes	<a href=&#39;?page=Annotation&feature=fig|6666666.640629.peg.1364&#39; target=_blank>fig|6666666.640629.peg.1364</a>, <a href=&#39;?page=Annotation&feature=fig|6666666.640629.peg.1548&#39; target=_blank>fig|6666666.640629.peg.1548</a>, <a href=&#39;?page=Annotation&feature=fig|6666666.640629.peg.2558&#39; target=_blank>fig|6666666.640629.peg.2558</a>, <a href=&#39;?page=Annotation&feature=fig|666…	yes
A and B	Cell Wall and Capsule	no subcategory	Murein Hydrolases	Muramoyltetrapeptide carboxypeptidase (EC 3.4.17.13)	<a href=&#39;?page=Annotation&feature=fig|6666666.640627.peg.241&#39; target=_blank>fig|6666666.640627.peg.241</a>, <a href=&#39;?page=Annotation&feature=fig|6666666.640627.peg.3425&#39; target=_blank>fig|6666666.640627.peg.3425</a>	yes	<a href=&#39;?page=Annotation&feature=fig|6666666.640629.peg.642&#39; target=_blank>fig|6666666.640629.peg.642</a>	yes
A and B	Cell Wall and Capsule	no subcategory	Murein Hydrolases	N-acetylmuramoyl-L-alanine amidase (EC 3.5.1.28)	<a href=&#39;?page=Annotation&feature=fig|6666666.640627.peg.315&#39; target=_blank>fig|6666666.640627.peg.315</a>, <a href=&#39;?page=Annotation&feature=fig|6666666.640627.peg.2021&#39; target=_blank>fig|6666666.640627.peg.2021</a>, <a href=&#39;?page=Annotation&feature=fig|6666666.640627.peg.2108&#39; target=_blank>fig|6666666.640627.peg.2108</a>, <a href=&#39;?page=Annotation&feature=fig|66666…	yes	<a href=&#39;?page=Annotation&feature=fig|6666666.640629.peg.211&#39; target=_blank>fig|6666666.640629.peg.211</a>, <a href=&#39;?page=Annotation&feature=fig|6666666.640629.peg.2642&#39; target=_blank>fig|6666666.640629.peg.2642</a>, <a href=&#39;?page=Annotation&feature=fig|6666666.640629.peg.3139&#39; target=_blank>fig|6666666.640629.peg.3139</a>, <a href=&#39;?page=Annotation&feature=fig|66666…	yes
A and B	Cell Wall and Capsule	no subcategory	Recycling of Peptidoglycan Amino Acids	Muramoyltetrapeptide carboxypeptidase (EC 3.4.17.13)	<a href=&#39;?page=Annotation&feature=fig|6666666.640627.peg.241&#39; target=_blank>fig|6666666.640627.peg.241</a>, <a href=&#39;?page=Annotation&feature=fig|6666666.640627.peg.3425&#39; target=_blank>fig|6666666.640627.peg.3425</a>	yes	<a href=&#39;?page=Annotation&feature=fig|6666666.640629.peg.642&#39; target=_blank>fig|6666666.640629.peg.642</a>	yes
A and B	Cell Wall and Capsule	no subcategory	Recycling of Peptidoglycan Amino Acids	N-acetylmuramoyl-L-alanine amidase (EC 3.5.1.28)	<a href=&#39;?page=Annotation&feature=fig|6666666.640627.peg.315&#39; target=_blank>fig|6666666.640627.peg.315</a>, <a href=&#39;?page=Annotation&feature=fig|6666666.640627.peg.2021&#39; target=_blank>fig|6666666.640627.peg.2021</a>, <a href=&#39;?page=Annotation&feature=fig|6666666.640627.peg.2108&#39; target=_blank>fig|6666666.640627.peg.2108</a>, <a href=&#39;?page=Annotation&feature=fig|66666…	yes	<a href=&#39;?page=Annotation&feature=fig|6666666.640629.peg.211&#39; target=_blank>fig|6666666.640629.peg.211</a>, <a href=&#39;?page=Annotation&feature=fig|6666666.640629.peg.2642&#39; target=_blank>fig|6666666.640629.peg.2642</a>, <a href=&#39;?page=Annotation&feature=fig|6666666.640629.peg.3139&#39; target=_blank>fig|6666666.640629.peg.3139</a>, <a href=&#39;?page=Annotation&feature=fig|66666…	yes
A and B	Cell Wall and Capsule	no subcategory	UDP-N-acetylmuramate from Fructose-6-phosphate Biosynthesis	Glucosamine-1-phosphate N-acetyltransferase (EC 2.3.1.157)	<a href=&#39;?page=Annotation&feature=fig|6666666.640627.peg.768&#39; target=_blank>fig|6666666.640627.peg.768</a>	yes	<a href=&#39;?page=Annotation&feature=fig|6666666.640629.peg.4281&#39; target=_blank>fig|6666666.640629.peg.4281</a>	yes
A and B	Cell Wall and Capsule	no subcategory	UDP-N-acetylmuramate from Fructose-6-phosphate Biosynthesis	N-acetylglucosamine-1-phosphate uridyltransferase (EC 2.7.7.23)	<a href=&#39;?page=Annotation&feature=fig|6666666.640627.peg.768&#39; target=_blank>fig|6666666.640627.peg.768</a>	yes	<a href=&#39;?page=Annotation&feature=fig|6666666.640629.peg.4281&#39; target=_blank>fig|6666666.640629.peg.4281</a>	yes
A and B	Cell Wall and Capsule	no subcategory	UDP-N-acetylmuramate from Fructose-6-phosphate Biosynthesis	Phosphoglucosamine mutase (EC 5.4.2.10)	<a href=&#39;?page=Annotation&feature=fig|6666666.640627.peg.274&#39; target=_blank>fig|6666666.640627.peg.274</a>	yes	<a href=&#39;?page=Annotation&feature=fig|6666666.640629.peg.3920&#39; target=_blank>fig|6666666.640629.peg.3920</a>	yes
A and B	Cell Wall and Capsule	no subcategory	UDP-N-acetylmuramate from Fructose-6-phosphate Biosynthesis	UDP-N-acetylglucosamine 1-carboxyvinyltransferase (EC 2.5.1.7)	<a href=&#39;?page=Annotation&feature=fig|6666666.640627.peg.2613&#39; target=_blank>fig|6666666.640627.peg.2613</a>, <a href=&#39;?page=Annotation&feature=fig|6666666.640627.peg.2645&#39; target=_blank>fig|6666666.640627.peg.2645</a>	yes	<a href=&#39;?page=Annotation&feature=fig|6666666.640629.peg.3005&#39; target=_blank>fig|6666666.640629.peg.3005</a>, <a href=&#39;?page=Annotation&feature=fig|6666666.640629.peg.3038&#39; target=_blank>fig|6666666.640629.peg.3038</a>	yes
A and B	Clustering-based subsystems	2 proteases and a MoxR	CBSS-1140.3.peg.2017	FIG001454: Transglutaminase-like enzymes, putative cysteine proteases	<a href=&#39;?page=Annotation&feature=fig|6666666.640627.peg.405&#39; target=_blank>fig|6666666.640627.peg.405</a>	yes	<a href=&#39;?page=Annotation&feature=fig|6666666.640629.peg.1821&#39; target=_blank>fig|6666666.640629.peg.1821</a>	yes
A and B	Clustering-based subsystems	2 proteases and a MoxR	CBSS-1140.3.peg.2017	FIG002343: hypothetical protein	<a href=&#39;?page=Annotation&feature=fig|6666666.640627.peg.404&#39; target=_blank>fig|6666666.640627.peg.404</a>	yes	<a href=&#39;?page=Annotation&feature=fig|6666666.640629.peg.1822&#39; target=_blank>fig|6666666.640629.peg.1822</a>	yes
A and B	Clustering-based subsystems	2 proteases and a MoxR	CBSS-1140.3.peg.2017	FIG022979: MoxR-like ATPases	<a href=&#39;?page=Annotation&feature=fig|6666666.640627.peg.403&#39; target=_blank>fig|6666666.640627.peg.403</a>, <a href=&#39;?page=Annotation&feature=fig|6666666.640627.peg.637&#39; target=_blank>fig|6666666.640627.peg.637</a>	yes	<a href=&#39;?page=Annotation&feature=fig|6666666.640629.peg.1823&#39; target=_blank>fig|6666666.640629.peg.1823</a>	yes
A and B	Clustering-based subsystems	Cell Division	CBSS-393130.3.peg.794	Cysteine desulfurase (EC 2.8.1.7)	<a href=&#39;?page=Annotation&feature=fig|6666666.640627.peg.64&#39; target=_blank>fig|6666666.640627.peg.64</a>, <a href=&#39;?page=Annotation&feature=fig|6666666.640627.peg.2014&#39; target=_blank>fig|6666666.640627.peg.2014</a>, <a href=&#39;?page=Annotation&feature=fig|6666666.640627.peg.3516&#39; target=_blank>fig|6666666.640627.peg.3516</a>	yes	<a href=&#39;?page=Annotation&feature=fig|6666666.640629.peg.220&#39; target=_blank>fig|6666666.640629.peg.220</a>, <a href=&#39;?page=Annotation&feature=fig|6666666.640629.peg.3992&#39; target=_blank>fig|6666666.640629.peg.3992</a>	yes
A and B	Clustering-based subsystems	Cell Division	CBSS-393130.3.peg.794	Free methionine-(R)-sulfoxide reductase, contains GAF domain	<a href=&#39;?page=Annotation&feature=fig|6666666.640627.peg.2250&#39; target=_blank>fig|6666666.640627.peg.2250</a>	yes	<a href=&#39;?page=Annotation&feature=fig|6666666.640629.peg.43&#39; target=_blank>fig|6666666.640629.peg.43</a>	yes
A and B	Clustering-based subsystems	Cell Division	CBSS-393130.3.peg.794	SSU ribosomal protein S4p (S9e)	<a href=&#39;?page=Annotation&feature=fig|6666666.640627.peg.2252&#39; target=_blank>fig|6666666.640627.peg.2252</a>	yes	<a href=&#39;?page=Annotation&feature=fig|6666666.640629.peg.42&#39; target=_blank>fig|6666666.640629.peg.42</a>	yes
A and B	Clustering-based subsystems	Cell Division	CBSS-393130.3.peg.794	Septation ring formation regulator EzrA	<a href=&#39;?page=Annotation&feature=fig|6666666.640627.peg.2248&#39; target=_blank>fig|6666666.640627.peg.2248</a>	yes	<a href=&#39;?page=Annotation&feature=fig|6666666.640629.peg.46&#39; target=_blank>fig|6666666.640629.peg.46</a>	yes
A and B	Clustering-based subsystems	Cell Division	Septum site-determining cluster Min	Septum site-determining protein MinC	<a href=&#39;?page=Annotation&feature=fig|6666666.640627.peg.2062&#39; target=_blank>fig|6666666.640627.peg.2062</a>	yes	<a href=&#39;?page=Annotation&feature=fig|6666666.640629.peg.176&#39; target=_blank>fig|6666666.640629.peg.176</a>	yes
A and B	Clustering-based subsystems	Cell Division	Septum site-determining cluster Min	Septum site-determining protein MinD	<a href=&#39;?page=Annotation&feature=fig|6666666.640627.peg.2061&#39; target=_blank>fig|6666666.640627.peg.2061</a>	yes	<a href=&#39;?page=Annotation&feature=fig|6666666.640629.peg.177&#39; target=_blank>fig|6666666.640629.peg.177</a>	yes
B	Clustering-based subsystems	Cell Division	Bacterial cell division cluster	Septum formation protein Maf	<input type=&#39;button&#39; value=&#39;find&#39; onclick=&#39;window.open("?page=SearchGene&fr=Septum formation protein Maf&organism=6666666.640627&subsystem=Bacterial_cell_division_cluster&template_gene=fig|6666666.640629.peg.171");&#39;>	no	<a href=&#39;?page=Annotation&feature=fig|6666666.640629.peg.171&#39; target=_blank>fig|6666666.640629.peg.171</a>	yes
A and B	Clustering-based subsystems	Central carbohydrate metabolism	Glyoxylate bypass cluster	Isocitrate lyase (EC 4.1.3.1)	<a href=&#39;?page=Annotation&feature=fig|6666666.640627.peg.582&#39; target=_blank>fig|6666666.640627.peg.582</a>	yes	<a href=&#39;?page=Annotation&feature=fig|6666666.640629.peg.786&#39; target=_blank>fig|6666666.640629.peg.786</a>	yes
A and B	Clustering-based subsystems	Central carbohydrate metabolism	Glyoxylate bypass cluster	Malate synthase G (EC 2.3.3.9)	<a href=&#39;?page=Annotation&feature=fig|6666666.640627.peg.549&#39; target=_blank>fig|6666666.640627.peg.549</a>	yes	<a href=&#39;?page=Annotation&feature=fig|6666666.640629.peg.1864&#39; target=_blank>fig|6666666.640629.peg.1864</a>	yes
A and B	Clustering-based subsystems	Clustering-based subsystems	Sporulation-related Hypotheticals	MreB-like protein (Mbl protein)	<a href=&#39;?page=Annotation&feature=fig|6666666.640627.peg.2608&#39; target=_blank>fig|6666666.640627.peg.2608</a>, <a href=&#39;?page=Annotation&feature=fig|6666666.640627.peg.4066&#39; target=_blank>fig|6666666.640627.peg.4066</a>	yes	<a href=&#39;?page=Annotation&feature=fig|6666666.640629.peg.3042&#39; target=_blank>fig|6666666.640629.peg.3042</a>, <a href=&#39;?page=Annotation&feature=fig|6666666.640629.peg.3231&#39; target=_blank>fig|6666666.640629.peg.3231</a>	yes
A and B	Clustering-based subsystems	Clustering-based subsystems	Sporulation-related Hypotheticals	Stage II sporulation protein D (SpoIID)	<a href=&#39;?page=Annotation&feature=fig|6666666.640627.peg.3429&#39; target=_blank>fig|6666666.640627.peg.3429</a>	yes	<a href=&#39;?page=Annotation&feature=fig|6666666.640629.peg.3039&#39; target=_blank>fig|6666666.640629.peg.3039</a>	yes
A and B	Clustering-based subsystems	Clustering-based subsystems	Sporulation-related Hypotheticals	Stage II sporulation protein related to metaloproteases (SpoIIQ)	<a href=&#39;?page=Annotation&feature=fig|6666666.640627.peg.3430&#39; target=_blank>fig|6666666.640627.peg.3430</a>	yes	<a href=&#39;?page=Annotation&feature=fig|6666666.640629.peg.3040&#39; target=_blank>fig|6666666.640629.peg.3040</a>	yes
A and B	Clustering-based subsystems	Clustering-based subsystems	Sporulation-related Hypotheticals	Stage III sporulation protein D	<a href=&#39;?page=Annotation&feature=fig|6666666.640627.peg.2609&#39; target=_blank>fig|6666666.640627.peg.2609</a>	yes	<a href=&#39;?page=Annotation&feature=fig|6666666.640629.peg.3041&#39; target=_blank>fig|6666666.640629.peg.3041</a>	yes
A and B	Clustering-based subsystems	Clustering-based subsystems	Sporulation-related Hypotheticals	UDP-N-acetylglucosamine 1-carboxyvinyltransferase (EC 2.5.1.7)	<a href=&#39;?page=Annotation&feature=fig|6666666.640627.peg.2613&#39; target=_blank>fig|6666666.640627.peg.2613</a>, <a href=&#39;?page=Annotation&feature=fig|6666666.640627.peg.2645&#39; target=_blank>fig|6666666.640627.peg.2645</a>	yes	<a href=&#39;?page=Annotation&feature=fig|6666666.640629.peg.3005&#39; target=_blank>fig|6666666.640629.peg.3005</a>, <a href=&#39;?page=Annotation&feature=fig|6666666.640629.peg.3038&#39; target=_blank>fig|6666666.640629.peg.3038</a>	yes
A	Clustering-based subsystems	Clustering-based subsystems	Sporulation-related Hypotheticals	FIG013354: hypothetical protein	<a href=&#39;?page=Annotation&feature=fig|6666666.640627.peg.2614&#39; target=_blank>fig|6666666.640627.peg.2614</a>	yes	<input type=&#39;button&#39; class=&#39;button&#39; value=&#39;find&#39; onclick=&#39;window.open("?page=SearchGene&fr=FIG013354: hypothetical protein&organism=6666666.640629&subsystem=Sporulation-related_Hypotheticals&template_gene=fig|6666666.640627.peg.2614");&#39;>	no
A and B	Clustering-based subsystems	Cofactors	Riboflavin synthesis cluster	3,4-dihydroxy-2-butanone 4-phosphate synthase (EC 4.1.99.12)	<a href=&#39;?page=Annotation&feature=fig|6666666.640627.peg.3888&#39; target=_blank>fig|6666666.640627.peg.3888</a>	yes	<a href=&#39;?page=Annotation&feature=fig|6666666.640629.peg.4255&#39; target=_blank>fig|6666666.640629.peg.4255</a>	yes
A and B	Clustering-based subsystems	Cofactors	Riboflavin synthesis cluster	5-amino-6-(5-phosphoribosylamino)uracil reductase (EC 1.1.1.193)	<a href=&#39;?page=Annotation&feature=fig|6666666.640627.peg.919&#39; target=_blank>fig|6666666.640627.peg.919</a>	yes	<a href=&#39;?page=Annotation&feature=fig|6666666.640629.peg.4253&#39; target=_blank>fig|6666666.640629.peg.4253</a>	yes
A and B	Clustering-based subsystems	Cofactors	Riboflavin synthesis cluster	6,7-dimethyl-8-ribityllumazine synthase (EC 2.5.1.78)	<a href=&#39;?page=Annotation&feature=fig|6666666.640627.peg.3887&#39; target=_blank>fig|6666666.640627.peg.3887</a>	yes	<a href=&#39;?page=Annotation&feature=fig|6666666.640629.peg.4256&#39; target=_blank>fig|6666666.640629.peg.4256</a>	yes
A and B	Clustering-based subsystems	Cofactors	Riboflavin synthesis cluster	Diacylglycerol kinase (EC 2.7.1.107)	<a href=&#39;?page=Annotation&feature=fig|6666666.640627.peg.1943&#39; target=_blank>fig|6666666.640627.peg.1943</a>	yes	<a href=&#39;?page=Annotation&feature=fig|6666666.640629.peg.283&#39; target=_blank>fig|6666666.640629.peg.283</a>	yes
A and B	Clustering-based subsystems	Cofactors	Riboflavin synthesis cluster	Diaminohydroxyphosphoribosylaminopyrimidine deaminase (EC 3.5.4.26)	<a href=&#39;?page=Annotation&feature=fig|6666666.640627.peg.919&#39; target=_blank>fig|6666666.640627.peg.919</a>	yes	<a href=&#39;?page=Annotation&feature=fig|6666666.640629.peg.4253&#39; target=_blank>fig|6666666.640629.peg.4253</a>	yes
A and B	Clustering-based subsystems	Cofactors	Riboflavin synthesis cluster	GTP cyclohydrolase II (EC 3.5.4.25)	<a href=&#39;?page=Annotation&feature=fig|6666666.640627.peg.920&#39; target=_blank>fig|6666666.640627.peg.920</a>, <a href=&#39;?page=Annotation&feature=fig|6666666.640627.peg.3888&#39; target=_blank>fig|6666666.640627.peg.3888</a>	yes	<a href=&#39;?page=Annotation&feature=fig|6666666.640629.peg.4255&#39; target=_blank>fig|6666666.640629.peg.4255</a>	yes
A and B	Clustering-based subsystems	Cofactors	Riboflavin synthesis cluster	Inner membrane protein YihY, formerly thought to be RNase BN	<a href=&#39;?page=Annotation&feature=fig|6666666.640627.peg.3647&#39; target=_blank>fig|6666666.640627.peg.3647</a>	yes	<a href=&#39;?page=Annotation&feature=fig|6666666.640629.peg.3240&#39; target=_blank>fig|6666666.640629.peg.3240</a>	yes
A and B	Clustering-based subsystems	Cofactors	Riboflavin synthesis cluster	NADH dehydrogenase (EC 1.6.99.3)	<a href=&#39;?page=Annotation&feature=fig|6666666.640627.peg.100&#39; target=_blank>fig|6666666.640627.peg.100</a>, <a href=&#39;?page=Annotation&feature=fig|6666666.640627.peg.1080&#39; target=_blank>fig|6666666.640627.peg.1080</a>, <a href=&#39;?page=Annotation&feature=fig|6666666.640627.peg.2345&#39; target=_blank>fig|6666666.640627.peg.2345</a>, <a href=&#39;?page=Annotation&feature=fig|66666…	yes	<a href=&#39;?page=Annotation&feature=fig|6666666.640629.peg.724&#39; target=_blank>fig|6666666.640629.peg.724</a>, <a href=&#39;?page=Annotation&feature=fig|6666666.640629.peg.1859&#39; target=_blank>fig|6666666.640629.peg.1859</a>, <a href=&#39;?page=Annotation&feature=fig|6666666.640629.peg.2861&#39; target=_blank>fig|6666666.640629.peg.2861</a>, <a href=&#39;?page=Annotation&feature=fig|66666…	yes
A and B	Clustering-based subsystems	Cofactors	Riboflavin synthesis cluster	Orotidine 5&#39;-phosphate decarboxylase (EC 4.1.1.23)	<a href=&#39;?page=Annotation&feature=fig|6666666.640627.peg.1545&#39; target=_blank>fig|6666666.640627.peg.1545</a>	yes	<a href=&#39;?page=Annotation&feature=fig|6666666.640629.peg.2350&#39; target=_blank>fig|6666666.640629.peg.2350</a>	yes
A and B	Clustering-based subsystems	Cofactors	Riboflavin synthesis cluster	Phosphoribosyl-ATP pyrophosphatase (EC 3.6.1.31)	<a href=&#39;?page=Annotation&feature=fig|6666666.640627.peg.4323&#39; target=_blank>fig|6666666.640627.peg.4323</a>	yes	<a href=&#39;?page=Annotation&feature=fig|6666666.640629.peg.864&#39; target=_blank>fig|6666666.640629.peg.864</a>	yes
A and B	Clustering-based subsystems	Cofactors	Riboflavin synthesis cluster	Riboflavin synthase eubacterial/eukaryotic (EC 2.5.1.9)	<a href=&#39;?page=Annotation&feature=fig|6666666.640627.peg.3889&#39; target=_blank>fig|6666666.640627.peg.3889</a>	yes	<a href=&#39;?page=Annotation&feature=fig|6666666.640629.peg.4254&#39; target=_blank>fig|6666666.640629.peg.4254</a>	yes
A and B	Clustering-based subsystems	Cofactors	Riboflavin synthesis cluster	Ribulose-phosphate 3-epimerase (EC 5.1.3.1)	<a href=&#39;?page=Annotation&feature=fig|6666666.640627.peg.1566&#39; target=_blank>fig|6666666.640627.peg.1566</a>	yes	<a href=&#39;?page=Annotation&feature=fig|6666666.640629.peg.2368&#39; target=_blank>fig|6666666.640629.peg.2368</a>, <a href=&#39;?page=Annotation&feature=fig|6666666.640629.peg.3651&#39; target=_blank>fig|6666666.640629.peg.3651</a>	yes
A and B	Clustering-based subsystems	Cofactors	Riboflavin synthesis cluster	Thiamine-monophosphate kinase (EC 2.7.4.16)	<a href=&#39;?page=Annotation&feature=fig|6666666.640627.peg.982&#39; target=_blank>fig|6666666.640627.peg.982</a>	yes	<a href=&#39;?page=Annotation&feature=fig|6666666.640629.peg.4015&#39; target=_blank>fig|6666666.640629.peg.4015</a>	yes
A and B	Clustering-based subsystems	Cofactors	Riboflavin synthesis cluster	Transcription termination protein NusB	<a href=&#39;?page=Annotation&feature=fig|6666666.640627.peg.1860&#39; target=_blank>fig|6666666.640627.peg.1860</a>	yes	<a href=&#39;?page=Annotation&feature=fig|6666666.640629.peg.372&#39; target=_blank>fig|6666666.640629.peg.372</a>	yes
A and B	Clustering-based subsystems	DNA metabolism	Rad50-Mre11 DNA repair cluster	DNA double-strand break repair protein Mre11	<a href=&#39;?page=Annotation&feature=fig|6666666.640627.peg.1240&#39; target=_blank>fig|6666666.640627.peg.1240</a>	yes	<a href=&#39;?page=Annotation&feature=fig|6666666.640629.peg.1384&#39; target=_blank>fig|6666666.640629.peg.1384</a>	yes
A and B	Clustering-based subsystems	DNA metabolism	Rad50-Mre11 DNA repair cluster	Exonuclease SbcC	<a href=&#39;?page=Annotation&feature=fig|6666666.640627.peg.3440&#39; target=_blank>fig|6666666.640627.peg.3440</a>	yes	<a href=&#39;?page=Annotation&feature=fig|6666666.640629.peg.2438&#39; target=_blank>fig|6666666.640629.peg.2438</a>	yes
A and B	Clustering-based subsystems	DNA metabolism	Rad50-Mre11 DNA repair cluster	Exonuclease SbcD	<a href=&#39;?page=Annotation&feature=fig|6666666.640627.peg.3441&#39; target=_blank>fig|6666666.640627.peg.3441</a>	yes	<a href=&#39;?page=Annotation&feature=fig|6666666.640629.peg.2439&#39; target=_blank>fig|6666666.640629.peg.2439</a>	yes
A	Clustering-based subsystems	DNA metabolism	Rad50-Mre11 DNA repair cluster	3&#39;->5&#39; exoribonuclease Bsu YhaM	<a href=&#39;?page=Annotation&feature=fig|6666666.640627.peg.1243&#39; target=_blank>fig|6666666.640627.peg.1243</a>	yes	<input type=&#39;button&#39; class=&#39;button&#39; value=&#39;find&#39; onclick=&#39;window.open("?page=SearchGene&fr=3%27->5%27 exoribonuclease Bsu YhaM&organism=6666666.640629&subsystem=Rad50-Mre11_DNA_repair_cluster&template_gene=fig|6666666.640627.peg.1243");&#39;>	no
A and B	Clustering-based subsystems	Isoprenoid/cell wall biosynthesis: PREDICTED UNDECAPRENYL DIPHOSPHATE PHOSPHATASE	CBSS-83331.1.peg.3039	Cell division protein FtsI [Peptidoglycan synthetase] (EC 2.4.1.129)	<a href=&#39;?page=Annotation&feature=fig|6666666.640627.peg.1515&#39; target=_blank>fig|6666666.640627.peg.1515</a>, <a href=&#39;?page=Annotation&feature=fig|6666666.640627.peg.1516&#39; target=_blank>fig|6666666.640627.peg.1516</a>	yes	<a href=&#39;?page=Annotation&feature=fig|6666666.640629.peg.1884&#39; target=_blank>fig|6666666.640629.peg.1884</a>, <a href=&#39;?page=Annotation&feature=fig|6666666.640629.peg.2315&#39; target=_blank>fig|6666666.640629.peg.2315</a>, <a href=&#39;?page=Annotation&feature=fig|6666666.640629.peg.2316&#39; target=_blank>fig|6666666.640629.peg.2316</a>	yes
A and B	Clustering-based subsystems	Isoprenoid/cell wall biosynthesis: PREDICTED UNDECAPRENYL DIPHOSPHATE PHOSPHATASE	CBSS-83331.1.peg.3039	Penicillin-binding protein 3	<a href=&#39;?page=Annotation&feature=fig|6666666.640627.peg.2957&#39; target=_blank>fig|6666666.640627.peg.2957</a>	yes	<a href=&#39;?page=Annotation&feature=fig|6666666.640629.peg.1846&#39; target=_blank>fig|6666666.640629.peg.1846</a>	yes
A and B	Clustering-based subsystems	Isoprenoid/cell wall biosynthesis: PREDICTED UNDECAPRENYL DIPHOSPHATE PHOSPHATASE	CBSS-83331.1.peg.3039	Undecaprenyl diphosphate synthase (EC 2.5.1.31)	<a href=&#39;?page=Annotation&feature=fig|6666666.640627.peg.426&#39; target=_blank>fig|6666666.640627.peg.426</a>, <a href=&#39;?page=Annotation&feature=fig|6666666.640627.peg.1647&#39; target=_blank>fig|6666666.640627.peg.1647</a>	yes	<a href=&#39;?page=Annotation&feature=fig|6666666.640629.peg.3455&#39; target=_blank>fig|6666666.640629.peg.3455</a>	yes
A	Clustering-based subsystems	Isoprenoid/cell wall biosynthesis: PREDICTED UNDECAPRENYL DIPHOSPHATE PHOSPHATASE	CBSS-83331.1.peg.3039	Intramembrane protease RasP/YluC, implicated in cell division based on FtsL cleavage	<a href=&#39;?page=Annotation&feature=fig|6666666.640627.peg.1649&#39; target=_blank>fig|6666666.640627.peg.1649</a>	yes	<input type=&#39;button&#39; class=&#39;button&#39; value=&#39;find&#39; onclick=&#39;window.open("?page=SearchGene&fr=Intramembrane protease RasP/YluC, implicated in cell division based on FtsL cleavage&organism=6666666.640629&subsystem=CBSS-83331.1.peg.3039&template_gene=fig|6666666.640627.peg.1649");&#39;>	no
B	Clustering-based subsystems	Isoprenoid/cell wall biosynthesis: PREDICTED UNDECAPRENYL DIPHOSPHATE PHOSPHATASE	CBSS-83331.1.peg.3039	1-deoxy-D-xylulose 5-phosphate reductoisomerase (EC 1.1.1.267)	<input type=&#39;button&#39; value=&#39;find&#39; onclick=&#39;window.open("?page=SearchGene&fr=1-deoxy-D-xylulose 5-phosphate reductoisomerase (EC 1.1.1.267)&organism=6666666.640627&subsystem=CBSS-83331.1.peg.3039&template_gene=fig|6666666.640629.peg.3457");&#39;>	no	<a href=&#39;?page=Annotation&feature=fig|6666666.640629.peg.3457&#39; target=_blank>fig|6666666.640629.peg.3457</a>	yes
A and B	Clustering-based subsystems	Lysine, threonine, methionine, and cysteine	CBSS-84588.1.peg.1247	Cysteine desulfurase (EC 2.8.1.7)	<a href=&#39;?page=Annotation&feature=fig|6666666.640627.peg.64&#39; target=_blank>fig|6666666.640627.peg.64</a>, <a href=&#39;?page=Annotation&feature=fig|6666666.640627.peg.2014&#39; target=_blank>fig|6666666.640627.peg.2014</a>, <a href=&#39;?page=Annotation&feature=fig|6666666.640627.peg.3516&#39; target=_blank>fig|6666666.640627.peg.3516</a>	yes	<a href=&#39;?page=Annotation&feature=fig|6666666.640629.peg.220&#39; target=_blank>fig|6666666.640629.peg.220</a>, <a href=&#39;?page=Annotation&feature=fig|6666666.640629.peg.3992&#39; target=_blank>fig|6666666.640629.peg.3992</a>	yes
A and B	Clustering-based subsystems	Lysine, threonine, methionine, and cysteine	CBSS-84588.1.peg.1247	D-alanyl-D-alanine carboxypeptidase (EC 3.4.16.4)	<a href=&#39;?page=Annotation&feature=fig|6666666.640627.peg.716&#39; target=_blank>fig|6666666.640627.peg.716</a>, <a href=&#39;?page=Annotation&feature=fig|6666666.640627.peg.1794&#39; target=_blank>fig|6666666.640627.peg.1794</a>, <a href=&#39;?page=Annotation&feature=fig|6666666.640627.peg.1814&#39; target=_blank>fig|6666666.640627.peg.1814</a>, <a href=&#39;?page=Annotation&feature=fig|66666…	yes	<a href=&#39;?page=Annotation&feature=fig|6666666.640629.peg.1364&#39; target=_blank>fig|6666666.640629.peg.1364</a>, <a href=&#39;?page=Annotation&feature=fig|6666666.640629.peg.1548&#39; target=_blank>fig|6666666.640629.peg.1548</a>, <a href=&#39;?page=Annotation&feature=fig|6666666.640629.peg.2558&#39; target=_blank>fig|6666666.640629.peg.2558</a>, <a href=&#39;?page=Annotation&feature=fig|666…	yes
A and B	Clustering-based subsystems	Lysine, threonine, methionine, and cysteine	CBSS-84588.1.peg.1247	Diaminopimelate epimerase (EC 5.1.1.7)	<a href=&#39;?page=Annotation&feature=fig|6666666.640627.peg.2348&#39; target=_blank>fig|6666666.640627.peg.2348</a>	yes	<a href=&#39;?page=Annotation&feature=fig|6666666.640629.peg.2075&#39; target=_blank>fig|6666666.640629.peg.2075</a>	yes
A and B	Clustering-based subsystems	May be related to ADP-phosphoribose and NAD-dependent acetylation	CBSS-216591.1.peg.168	ADP-ribose pyrophosphatase (EC 3.6.1.13)	<a href=&#39;?page=Annotation&feature=fig|6666666.640627.peg.1823&#39; target=_blank>fig|6666666.640627.peg.1823</a>	yes	<a href=&#39;?page=Annotation&feature=fig|6666666.640629.peg.2588&#39; target=_blank>fig|6666666.640629.peg.2588</a>	yes
A and B	Clustering-based subsystems	May be related to ADP-phosphoribose and NAD-dependent acetylation	CBSS-216591.1.peg.168	Aspartate aminotransferase (EC 2.6.1.1)	<a href=&#39;?page=Annotation&feature=fig|6666666.640627.peg.1720&#39; target=_blank>fig|6666666.640627.peg.1720</a>, <a href=&#39;?page=Annotation&feature=fig|6666666.640627.peg.2575&#39; target=_blank>fig|6666666.640627.peg.2575</a>	yes	<a href=&#39;?page=Annotation&feature=fig|6666666.640629.peg.518&#39; target=_blank>fig|6666666.640629.peg.518</a>, <a href=&#39;?page=Annotation&feature=fig|6666666.640629.peg.1220&#39; target=_blank>fig|6666666.640629.peg.1220</a>, <a href=&#39;?page=Annotation&feature=fig|6666666.640629.peg.2473&#39; target=_blank>fig|6666666.640629.peg.2473</a>	yes
A and B	Clustering-based subsystems	May be related to ADP-phosphoribose and NAD-dependent acetylation	CBSS-216591.1.peg.168	Aspartokinase (EC 2.7.2.4)	<a href=&#39;?page=Annotation&feature=fig|6666666.640627.peg.1670&#39; target=_blank>fig|6666666.640627.peg.1670</a>, <a href=&#39;?page=Annotation&feature=fig|6666666.640627.peg.1849&#39; target=_blank>fig|6666666.640627.peg.1849</a>, <a href=&#39;?page=Annotation&feature=fig|6666666.640627.peg.4016&#39; target=_blank>fig|6666666.640627.peg.4016</a>	yes	<a href=&#39;?page=Annotation&feature=fig|6666666.640629.peg.385&#39; target=_blank>fig|6666666.640629.peg.385</a>, <a href=&#39;?page=Annotation&feature=fig|6666666.640629.peg.2843&#39; target=_blank>fig|6666666.640629.peg.2843</a>, <a href=&#39;?page=Annotation&feature=fig|6666666.640629.peg.3478&#39; target=_blank>fig|6666666.640629.peg.3478</a>	yes
A and B	Clustering-based subsystems	May be related to ADP-phosphoribose and NAD-dependent acetylation	CBSS-216591.1.peg.168	Competence protein F homolog, phosphoribosyltransferase domain	<a href=&#39;?page=Annotation&feature=fig|6666666.640627.peg.2940&#39; target=_blank>fig|6666666.640627.peg.2940</a>	yes	<a href=&#39;?page=Annotation&feature=fig|6666666.640629.peg.937&#39; target=_blank>fig|6666666.640629.peg.937</a>	yes
A and B	Clustering-based subsystems	Phosphate metabolism	PhoR-PhoB two-component regulatory system	Phosphate regulon sensor protein PhoR (SphS) (EC 2.7.13.3)	<a href=&#39;?page=Annotation&feature=fig|6666666.640627.peg.948&#39; target=_blank>fig|6666666.640627.peg.948</a>, <a href=&#39;?page=Annotation&feature=fig|6666666.640627.peg.2207&#39; target=_blank>fig|6666666.640627.peg.2207</a>	yes	<a href=&#39;?page=Annotation&feature=fig|6666666.640629.peg.89&#39; target=_blank>fig|6666666.640629.peg.89</a>	yes
A and B	Clustering-based subsystems	Phosphate metabolism	PhoR-PhoB two-component regulatory system	Phosphate regulon transcriptional regulatory protein PhoB (SphR)	<a href=&#39;?page=Annotation&feature=fig|6666666.640627.peg.3605&#39; target=_blank>fig|6666666.640627.peg.3605</a>	yes	<a href=&#39;?page=Annotation&feature=fig|6666666.640629.peg.3002&#39; target=_blank>fig|6666666.640629.peg.3002</a>, <a href=&#39;?page=Annotation&feature=fig|6666666.640629.peg.4354&#39; target=_blank>fig|6666666.640629.peg.4354</a>	yes
A and B	Clustering-based subsystems	Probably GTP or GMP signaling related	CBSS-176299.4.peg.1292	DNA recombination and repair protein RecO	<a href=&#39;?page=Annotation&feature=fig|6666666.640627.peg.1940&#39; target=_blank>fig|6666666.640627.peg.1940</a>	yes	<a href=&#39;?page=Annotation&feature=fig|6666666.640629.peg.286&#39; target=_blank>fig|6666666.640629.peg.286</a>	yes
A and B	Clustering-based subsystems	Probably GTP or GMP signaling related	CBSS-176299.4.peg.1292	DNA-directed RNA polymerase omega subunit (EC 2.7.7.6)	<a href=&#39;?page=Annotation&feature=fig|6666666.640627.peg.1558&#39; target=_blank>fig|6666666.640627.peg.1558</a>	yes	<a href=&#39;?page=Annotation&feature=fig|6666666.640629.peg.2359&#39; target=_blank>fig|6666666.640629.peg.2359</a>	yes
A and B	Clustering-based subsystems	Probably GTP or GMP signaling related	CBSS-176299.4.peg.1292	GTP pyrophosphokinase (EC 2.7.6.5), (p)ppGpp synthetase II	<a href=&#39;?page=Annotation&feature=fig|6666666.640627.peg.2023&#39; target=_blank>fig|6666666.640627.peg.2023</a>	yes	<a href=&#39;?page=Annotation&feature=fig|6666666.640629.peg.209&#39; target=_blank>fig|6666666.640629.peg.209</a>, <a href=&#39;?page=Annotation&feature=fig|6666666.640629.peg.3950&#39; target=_blank>fig|6666666.640629.peg.3950</a>	yes
A and B	Clustering-based subsystems	Probably GTP or GMP signaling related	CBSS-176299.4.peg.1292	GTP-binding protein Era	<a href=&#39;?page=Annotation&feature=fig|6666666.640627.peg.1942&#39; target=_blank>fig|6666666.640627.peg.1942</a>	yes	<a href=&#39;?page=Annotation&feature=fig|6666666.640629.peg.284&#39; target=_blank>fig|6666666.640629.peg.284</a>	yes
A and B	Clustering-based subsystems	Probably GTP or GMP signaling related	CBSS-176299.4.peg.1292	Guanosine-3&#39;,5&#39;-bis(diphosphate) 3&#39;-pyrophosphohydrolase (EC 3.1.7.2)	<a href=&#39;?page=Annotation&feature=fig|6666666.640627.peg.2023&#39; target=_blank>fig|6666666.640627.peg.2023</a>	yes	<a href=&#39;?page=Annotation&feature=fig|6666666.640629.peg.209&#39; target=_blank>fig|6666666.640629.peg.209</a>, <a href=&#39;?page=Annotation&feature=fig|6666666.640629.peg.3950&#39; target=_blank>fig|6666666.640629.peg.3950</a>	yes
A and B	Clustering-based subsystems	Probably GTP or GMP signaling related	CBSS-176299.4.peg.1292	Ribonuclease III (EC 3.1.26.3)	<a href=&#39;?page=Annotation&feature=fig|6666666.640627.peg.1580&#39; target=_blank>fig|6666666.640627.peg.1580</a>	yes	<a href=&#39;?page=Annotation&feature=fig|6666666.640629.peg.3387&#39; target=_blank>fig|6666666.640629.peg.3387</a>	yes
A and B	Clustering-based subsystems	Probably GTP or GMP signaling related	CBSS-176299.4.peg.1292	Signal peptidase I (EC 3.4.21.89)	<a href=&#39;?page=Annotation&feature=fig|6666666.640627.peg.1284&#39; target=_blank>fig|6666666.640627.peg.1284</a>, <a href=&#39;?page=Annotation&feature=fig|6666666.640627.peg.1435&#39; target=_blank>fig|6666666.640627.peg.1435</a>, <a href=&#39;?page=Annotation&feature=fig|6666666.640627.peg.1593&#39; target=_blank>fig|6666666.640627.peg.1593</a>	yes	<a href=&#39;?page=Annotation&feature=fig|6666666.640629.peg.1428&#39; target=_blank>fig|6666666.640629.peg.1428</a>, <a href=&#39;?page=Annotation&feature=fig|6666666.640629.peg.2204&#39; target=_blank>fig|6666666.640629.peg.2204</a>, <a href=&#39;?page=Annotation&feature=fig|6666666.640629.peg.3400&#39; target=_blank>fig|6666666.640629.peg.3400</a>	yes
A and B	Clustering-based subsystems	Probably GTP or GMP signaling related	CBSS-176299.4.peg.1292	Signal peptidase SipW (EC 3.4.21.89), required for TasA secretion	<a href=&#39;?page=Annotation&feature=fig|6666666.640627.peg.1375&#39; target=_blank>fig|6666666.640627.peg.1375</a>, <a href=&#39;?page=Annotation&feature=fig|6666666.640627.peg.4452&#39; target=_blank>fig|6666666.640627.peg.4452</a>	yes	<a href=&#39;?page=Annotation&feature=fig|6666666.640629.peg.1003&#39; target=_blank>fig|6666666.640629.peg.1003</a>	yes
A and B	Clustering-based subsystems	Probably organic hydroperoxide resistance related hypothetical protein	CBSS-269482.1.peg.1294	Homoserine kinase (EC 2.7.1.39)	<a href=&#39;?page=Annotation&feature=fig|6666666.640627.peg.3459&#39; target=_blank>fig|6666666.640627.peg.3459</a>	yes	<a href=&#39;?page=Annotation&feature=fig|6666666.640629.peg.3117&#39; target=_blank>fig|6666666.640629.peg.3117</a>	yes
A and B	Clustering-based subsystems	Probably organic hydroperoxide resistance related hypothetical protein	CBSS-269482.1.peg.1294	Organic hydroperoxide resistance protein	<a href=&#39;?page=Annotation&feature=fig|6666666.640627.peg.1551&#39; target=_blank>fig|6666666.640627.peg.1551</a>	yes	<a href=&#39;?page=Annotation&feature=fig|6666666.640629.peg.3741&#39; target=_blank>fig|6666666.640629.peg.3741</a>	yes
A and B	Clustering-based subsystems	Recombination related cluster	CBSS-198094.1.peg.4426	DNA polymerase X family	<a href=&#39;?page=Annotation&feature=fig|6666666.640627.peg.2185&#39; target=_blank>fig|6666666.640627.peg.2185</a>	yes	<a href=&#39;?page=Annotation&feature=fig|6666666.640629.peg.120&#39; target=_blank>fig|6666666.640629.peg.120</a>	yes
A and B	Clustering-based subsystems	Recombination related cluster	CBSS-198094.1.peg.4426	Possible colicin V production protein	<a href=&#39;?page=Annotation&feature=fig|6666666.640627.peg.2186&#39; target=_blank>fig|6666666.640627.peg.2186</a>	yes	<a href=&#39;?page=Annotation&feature=fig|6666666.640629.peg.118&#39; target=_blank>fig|6666666.640629.peg.118</a>	yes
A and B	Clustering-based subsystems	Recombination related cluster	CBSS-198094.1.peg.4426	Recombination inhibitory protein MutS2	<a href=&#39;?page=Annotation&feature=fig|6666666.640627.peg.2184&#39; target=_blank>fig|6666666.640627.peg.2184</a>	yes	<a href=&#39;?page=Annotation&feature=fig|6666666.640629.peg.121&#39; target=_blank>fig|6666666.640629.peg.121</a>	yes
A and B	Clustering-based subsystems	Recombination related cluster	CBSS-198094.1.peg.4426	Ribonuclease HIII (EC 3.1.26.4)	<a href=&#39;?page=Annotation&feature=fig|6666666.640627.peg.2188&#39; target=_blank>fig|6666666.640627.peg.2188</a>	yes	<a href=&#39;?page=Annotation&feature=fig|6666666.640629.peg.116&#39; target=_blank>fig|6666666.640629.peg.116</a>	yes
B	Clustering-based subsystems	Sulfatases and sulfatase modifying factor 1 (and a hypothetical)	Sulfatases and sulfatase modifying factor 1	Sulfatase modifying factor 1 precursor (C-alpha-formyglycine- generating enzyme 1)	<input type=&#39;button&#39; value=&#39;find&#39; onclick=&#39;window.open("?page=SearchGene&fr=Sulfatase modifying factor 1 precursor (C-alpha-formyglycine- generating enzyme 1)&organism=6666666.640627&subsystem=Sulfatases_and_sulfatase_modifying_factor_1&template_gene=fig|6666666.640629.peg.1136");&#39;>	no	<a href=&#39;?page=Annotation&feature=fig|6666666.640629.peg.1136&#39; target=_blank>fig|6666666.640629.peg.1136</a>	yes
A and B	Clustering-based subsystems	TldD cluster	CBSS-354.1.peg.2917	Rod shape-determining protein MreC	<a href=&#39;?page=Annotation&feature=fig|6666666.640627.peg.2064&#39; target=_blank>fig|6666666.640627.peg.2064</a>	yes	<a href=&#39;?page=Annotation&feature=fig|6666666.640629.peg.174&#39; target=_blank>fig|6666666.640629.peg.174</a>	yes
A and B	Clustering-based subsystems	TldD cluster	CBSS-354.1.peg.2917	Rod shape-determining protein MreD	<a href=&#39;?page=Annotation&feature=fig|6666666.640627.peg.2063&#39; target=_blank>fig|6666666.640627.peg.2063</a>	yes	<a href=&#39;?page=Annotation&feature=fig|6666666.640629.peg.175&#39; target=_blank>fig|6666666.640629.peg.175</a>	yes
A and B	Clustering-based subsystems	no subcategory	Butyrate metabolism cluster	3-hydroxyacyl-CoA dehydrogenase (EC 1.1.1.35)	<a href=&#39;?page=Annotation&feature=fig|6666666.640627.peg.304&#39; target=_blank>fig|6666666.640627.peg.304</a>	yes	<a href=&#39;?page=Annotation&feature=fig|6666666.640629.peg.1069&#39; target=_blank>fig|6666666.640629.peg.1069</a>, <a href=&#39;?page=Annotation&feature=fig|6666666.640629.peg.1072&#39; target=_blank>fig|6666666.640629.peg.1072</a>, <a href=&#39;?page=Annotation&feature=fig|6666666.640629.peg.2687&#39; target=_blank>fig|6666666.640629.peg.2687</a>	yes
A and B	Clustering-based subsystems	no subcategory	Butyrate metabolism cluster	Acetyl-CoA acetyltransferase (EC 2.3.1.9)	<a href=&#39;?page=Annotation&feature=fig|6666666.640627.peg.305&#39; target=_blank>fig|6666666.640627.peg.305</a>, <a href=&#39;?page=Annotation&feature=fig|6666666.640627.peg.940&#39; target=_blank>fig|6666666.640627.peg.940</a>, <a href=&#39;?page=Annotation&feature=fig|6666666.640627.peg.2466&#39; target=_blank>fig|6666666.640627.peg.2466</a>, <a href=&#39;?page=Annotation&feature=fig|6666666…	yes	<a href=&#39;?page=Annotation&feature=fig|6666666.640629.peg.1067&#39; target=_blank>fig|6666666.640629.peg.1067</a>, <a href=&#39;?page=Annotation&feature=fig|6666666.640629.peg.1090&#39; target=_blank>fig|6666666.640629.peg.1090</a>, <a href=&#39;?page=Annotation&feature=fig|6666666.640629.peg.1104&#39; target=_blank>fig|6666666.640629.peg.1104</a>, <a href=&#39;?page=Annotation&feature=fig|666…	yes
A and B	Clustering-based subsystems	no subcategory	Butyrate metabolism cluster	Enoyl-CoA hydratase (EC 4.2.1.17)	<a href=&#39;?page=Annotation&feature=fig|6666666.640627.peg.290&#39; target=_blank>fig|6666666.640627.peg.290</a>, <a href=&#39;?page=Annotation&feature=fig|6666666.640627.peg.301&#39; target=_blank>fig|6666666.640627.peg.301</a>, <a href=&#39;?page=Annotation&feature=fig|6666666.640627.peg.302&#39; target=_blank>fig|6666666.640627.peg.302</a>, <a href=&#39;?page=Annotation&feature=fig|6666666.6…	yes	<a href=&#39;?page=Annotation&feature=fig|6666666.640629.peg.125&#39; target=_blank>fig|6666666.640629.peg.125</a>, <a href=&#39;?page=Annotation&feature=fig|6666666.640629.peg.1065&#39; target=_blank>fig|6666666.640629.peg.1065</a>, <a href=&#39;?page=Annotation&feature=fig|6666666.640629.peg.1380&#39; target=_blank>fig|6666666.640629.peg.1380</a>, <a href=&#39;?page=Annotation&feature=fig|66666…	yes
A and B	Clustering-based subsystems	no subcategory	CBSS-101031.3.peg.1876	NifU-like domain protein	<a href=&#39;?page=Annotation&feature=fig|6666666.640627.peg.2350&#39; target=_blank>fig|6666666.640627.peg.2350</a>	yes	<a href=&#39;?page=Annotation&feature=fig|6666666.640629.peg.729&#39; target=_blank>fig|6666666.640629.peg.729</a>	yes
A and B	Clustering-based subsystems	no subcategory	CBSS-101031.3.peg.1876	YuzD-like protein	<a href=&#39;?page=Annotation&feature=fig|6666666.640627.peg.2349&#39; target=_blank>fig|6666666.640627.peg.2349</a>	yes	<a href=&#39;?page=Annotation&feature=fig|6666666.640629.peg.728&#39; target=_blank>fig|6666666.640629.peg.728</a>	yes
A and B	Clustering-based subsystems	no subcategory	CBSS-1352.1.peg.856	Transcriptional regulator, PadR family	<a href=&#39;?page=Annotation&feature=fig|6666666.640627.peg.201&#39; target=_blank>fig|6666666.640627.peg.201</a>, <a href=&#39;?page=Annotation&feature=fig|6666666.640627.peg.423&#39; target=_blank>fig|6666666.640627.peg.423</a>, <a href=&#39;?page=Annotation&feature=fig|6666666.640627.peg.434&#39; target=_blank>fig|6666666.640627.peg.434</a>, <a href=&#39;?page=Annotation&feature=fig|6666666.6…	yes	<a href=&#39;?page=Annotation&feature=fig|6666666.640629.peg.543&#39; target=_blank>fig|6666666.640629.peg.543</a>, <a href=&#39;?page=Annotation&feature=fig|6666666.640629.peg.571&#39; target=_blank>fig|6666666.640629.peg.571</a>, <a href=&#39;?page=Annotation&feature=fig|6666666.640629.peg.1204&#39; target=_blank>fig|6666666.640629.peg.1204</a>, <a href=&#39;?page=Annotation&feature=fig|6666666…	yes
A and B	Clustering-based subsystems	no subcategory	CBSS-138119.3.peg.2719	Ribosome-binding factor A	<a href=&#39;?page=Annotation&feature=fig|6666666.640627.peg.1657&#39; target=_blank>fig|6666666.640627.peg.1657</a>	yes	<a href=&#39;?page=Annotation&feature=fig|6666666.640629.peg.3469&#39; target=_blank>fig|6666666.640629.peg.3469</a>	yes
A and B	Clustering-based subsystems	no subcategory	CBSS-138119.3.peg.2719	Translation initiation factor 2	<a href=&#39;?page=Annotation&feature=fig|6666666.640627.peg.1655&#39; target=_blank>fig|6666666.640627.peg.1655</a>	yes	<a href=&#39;?page=Annotation&feature=fig|6666666.640629.peg.3467&#39; target=_blank>fig|6666666.640629.peg.3467</a>	yes
A and B	Clustering-based subsystems	no subcategory	CBSS-176279.3.peg.868	FIG139598: Potential ribosomal protein	<a href=&#39;?page=Annotation&feature=fig|6666666.640627.peg.2052&#39; target=_blank>fig|6666666.640627.peg.2052</a>	yes	<a href=&#39;?page=Annotation&feature=fig|6666666.640629.peg.182&#39; target=_blank>fig|6666666.640629.peg.182</a>	yes
A and B	Clustering-based subsystems	no subcategory	CBSS-176279.3.peg.868	GTP-binding protein Obg	<a href=&#39;?page=Annotation&feature=fig|6666666.640627.peg.2049&#39; target=_blank>fig|6666666.640627.peg.2049</a>	yes	<a href=&#39;?page=Annotation&feature=fig|6666666.640629.peg.185&#39; target=_blank>fig|6666666.640629.peg.185</a>	yes
A and B	Clustering-based subsystems	no subcategory	CBSS-176279.3.peg.868	LSU ribosomal protein L21p	<a href=&#39;?page=Annotation&feature=fig|6666666.640627.peg.2053&#39; target=_blank>fig|6666666.640627.peg.2053</a>	yes	<a href=&#39;?page=Annotation&feature=fig|6666666.640629.peg.181&#39; target=_blank>fig|6666666.640629.peg.181</a>	yes
A and B	Clustering-based subsystems	no subcategory	CBSS-176279.3.peg.868	LSU ribosomal protein L27p	<a href=&#39;?page=Annotation&feature=fig|6666666.640627.peg.2051&#39; target=_blank>fig|6666666.640627.peg.2051</a>	yes	<a href=&#39;?page=Annotation&feature=fig|6666666.640629.peg.183&#39; target=_blank>fig|6666666.640629.peg.183</a>	yes
A and B	Clustering-based subsystems	no subcategory	CBSS-176299.4.peg.1996A	Bis(5&#39;-nucleosyl)-tetraphosphatase (asymmetrical) (EC 3.6.1.17)	<a href=&#39;?page=Annotation&feature=fig|6666666.640627.peg.1346&#39; target=_blank>fig|6666666.640627.peg.1346</a>	yes	<a href=&#39;?page=Annotation&feature=fig|6666666.640629.peg.1491&#39; target=_blank>fig|6666666.640629.peg.1491</a>	yes
A and B	Clustering-based subsystems	no subcategory	CBSS-176299.4.peg.1996A	Glycerophosphoryl diester phosphodiesterase (EC 3.1.4.46)	<a href=&#39;?page=Annotation&feature=fig|6666666.640627.peg.375&#39; target=_blank>fig|6666666.640627.peg.375</a>, <a href=&#39;?page=Annotation&feature=fig|6666666.640627.peg.1298&#39; target=_blank>fig|6666666.640627.peg.1298</a>, <a href=&#39;?page=Annotation&feature=fig|6666666.640627.peg.1829&#39; target=_blank>fig|6666666.640627.peg.1829</a>	yes	<a href=&#39;?page=Annotation&feature=fig|6666666.640629.peg.415&#39; target=_blank>fig|6666666.640629.peg.415</a>, <a href=&#39;?page=Annotation&feature=fig|6666666.640629.peg.3562&#39; target=_blank>fig|6666666.640629.peg.3562</a>	yes
A and B	Clustering-based subsystems	no subcategory	CBSS-188.1.peg.6720	Serine protein kinase (prkA protein), P-loop containing	<a href=&#39;?page=Annotation&feature=fig|6666666.640627.peg.2743&#39; target=_blank>fig|6666666.640627.peg.2743</a>	yes	<a href=&#39;?page=Annotation&feature=fig|6666666.640629.peg.1289&#39; target=_blank>fig|6666666.640629.peg.1289</a>	yes
A and B	Clustering-based subsystems	no subcategory	CBSS-188.1.peg.6720	UPF0229 protein YeaH	<a href=&#39;?page=Annotation&feature=fig|6666666.640627.peg.2742&#39; target=_blank>fig|6666666.640627.peg.2742</a>	yes	<a href=&#39;?page=Annotation&feature=fig|6666666.640629.peg.1293&#39; target=_blank>fig|6666666.640629.peg.1293</a>	yes
A and B	Clustering-based subsystems	no subcategory	CBSS-257314.1.peg.752	Acetate kinase (EC 2.7.2.1)	<a href=&#39;?page=Annotation&feature=fig|6666666.640627.peg.2238&#39; target=_blank>fig|6666666.640627.peg.2238</a>	yes	<a href=&#39;?page=Annotation&feature=fig|6666666.640629.peg.53&#39; target=_blank>fig|6666666.640629.peg.53</a>	yes
A and B	Clustering-based subsystems	no subcategory	CBSS-257314.1.peg.752	Adenine-specific methyltransferase (EC 2.1.1.72)	<a href=&#39;?page=Annotation&feature=fig|6666666.640627.peg.2239&#39; target=_blank>fig|6666666.640627.peg.2239</a>	yes	<a href=&#39;?page=Annotation&feature=fig|6666666.640629.peg.52&#39; target=_blank>fig|6666666.640629.peg.52</a>	yes
A and B	Clustering-based subsystems	no subcategory	CBSS-266117.6.peg.1260	16S rRNA (guanine(966)-N(2))-methyltransferase (EC 2.1.1.171)	<a href=&#39;?page=Annotation&feature=fig|6666666.640627.peg.1501&#39; target=_blank>fig|6666666.640627.peg.1501</a>	yes	<a href=&#39;?page=Annotation&feature=fig|6666666.640629.peg.2296&#39; target=_blank>fig|6666666.640629.peg.2296</a>	yes
A and B	Clustering-based subsystems	no subcategory	CBSS-266117.6.peg.1260	Phosphopantetheine adenylyltransferase (EC 2.7.7.3)	<a href=&#39;?page=Annotation&feature=fig|6666666.640627.peg.1502&#39; target=_blank>fig|6666666.640627.peg.1502</a>	yes	<a href=&#39;?page=Annotation&feature=fig|6666666.640629.peg.2297&#39; target=_blank>fig|6666666.640629.peg.2297</a>	yes
A and B	Clustering-based subsystems	no subcategory	CBSS-269801.1.peg.1715	16S rRNA (guanine(966)-N(2))-methyltransferase (EC 2.1.1.171)	<a href=&#39;?page=Annotation&feature=fig|6666666.640627.peg.1501&#39; target=_blank>fig|6666666.640627.peg.1501</a>	yes	<a href=&#39;?page=Annotation&feature=fig|6666666.640629.peg.2296&#39; target=_blank>fig|6666666.640629.peg.2296</a>	yes
A and B	Clustering-based subsystems	no subcategory	CBSS-269801.1.peg.1715	Lon-like protease with PDZ domain	<a href=&#39;?page=Annotation&feature=fig|6666666.640627.peg.1504&#39; target=_blank>fig|6666666.640627.peg.1504</a>	yes	<a href=&#39;?page=Annotation&feature=fig|6666666.640629.peg.2300&#39; target=_blank>fig|6666666.640629.peg.2300</a>	yes
A and B	Clustering-based subsystems	no subcategory	CBSS-269801.1.peg.1715	Phosphopantetheine adenylyltransferase (EC 2.7.7.3)	<a href=&#39;?page=Annotation&feature=fig|6666666.640627.peg.1502&#39; target=_blank>fig|6666666.640627.peg.1502</a>	yes	<a href=&#39;?page=Annotation&feature=fig|6666666.640629.peg.2297&#39; target=_blank>fig|6666666.640629.peg.2297</a>	yes
A and B	Clustering-based subsystems	no subcategory	CBSS-272943.3.peg.1367	DNA topoisomerase I (EC 5.99.1.2)	<a href=&#39;?page=Annotation&feature=fig|6666666.640627.peg.1601&#39; target=_blank>fig|6666666.640627.peg.1601</a>	yes	<a href=&#39;?page=Annotation&feature=fig|6666666.640629.peg.3409&#39; target=_blank>fig|6666666.640629.peg.3409</a>	yes
A and B	Clustering-based subsystems	no subcategory	CBSS-272943.3.peg.1367	Rossmann fold nucleotide-binding protein Smf possibly involved in DNA uptake	<a href=&#39;?page=Annotation&feature=fig|6666666.640627.peg.1600&#39; target=_blank>fig|6666666.640627.peg.1600</a>	yes	<a href=&#39;?page=Annotation&feature=fig|6666666.640629.peg.3408&#39; target=_blank>fig|6666666.640629.peg.3408</a>	yes
A and B	Clustering-based subsystems	no subcategory	CBSS-279010.5.peg.1697	FIG011856: hypothetical protein	<a href=&#39;?page=Annotation&feature=fig|6666666.640627.peg.1528&#39; target=_blank>fig|6666666.640627.peg.1528</a>	yes	<a href=&#39;?page=Annotation&feature=fig|6666666.640629.peg.2333&#39; target=_blank>fig|6666666.640629.peg.2333</a>	yes
A and B	Clustering-based subsystems	no subcategory	CBSS-279010.5.peg.1697	RNA polymerase sporulation specific sigma factor SigE	<a href=&#39;?page=Annotation&feature=fig|6666666.640627.peg.1526&#39; target=_blank>fig|6666666.640627.peg.1526</a>	yes	<a href=&#39;?page=Annotation&feature=fig|6666666.640629.peg.2331&#39; target=_blank>fig|6666666.640629.peg.2331</a>	yes
A and B	Clustering-based subsystems	no subcategory	CBSS-279010.5.peg.1697	RNA polymerase sporulation specific sigma factor SigG	<a href=&#39;?page=Annotation&feature=fig|6666666.640627.peg.1527&#39; target=_blank>fig|6666666.640627.peg.1527</a>	yes	<a href=&#39;?page=Annotation&feature=fig|6666666.640629.peg.2332&#39; target=_blank>fig|6666666.640629.peg.2332</a>	yes
A and B	Clustering-based subsystems	no subcategory	CBSS-288681.3.peg.1039	Conserved protein YqhG	<a href=&#39;?page=Annotation&feature=fig|6666666.640627.peg.1887&#39; target=_blank>fig|6666666.640627.peg.1887</a>	yes	<a href=&#39;?page=Annotation&feature=fig|6666666.640629.peg.344&#39; target=_blank>fig|6666666.640629.peg.344</a>	yes
A and B	Clustering-based subsystems	no subcategory	CBSS-288681.3.peg.1039	Superfamily II DNA/RNA helicases, SNF2 family	<a href=&#39;?page=Annotation&feature=fig|6666666.640627.peg.1886&#39; target=_blank>fig|6666666.640627.peg.1886</a>	yes	<a href=&#39;?page=Annotation&feature=fig|6666666.640629.peg.345&#39; target=_blank>fig|6666666.640629.peg.345</a>	yes
A and B	Clustering-based subsystems	no subcategory	CBSS-312309.3.peg.1965	Methionine aminopeptidase (EC 3.4.11.18)	<a href=&#39;?page=Annotation&feature=fig|6666666.640627.peg.1222&#39; target=_blank>fig|6666666.640627.peg.1222</a>	yes	<a href=&#39;?page=Annotation&feature=fig|6666666.640629.peg.1348&#39; target=_blank>fig|6666666.640629.peg.1348</a>, <a href=&#39;?page=Annotation&feature=fig|6666666.640629.peg.4120&#39; target=_blank>fig|6666666.640629.peg.4120</a>	yes
A and B	Clustering-based subsystems	no subcategory	CBSS-312309.3.peg.1965	SSU ribosomal protein S2p (SAe)	<a href=&#39;?page=Annotation&feature=fig|6666666.640627.peg.1643&#39; target=_blank>fig|6666666.640627.peg.1643</a>	yes	<a href=&#39;?page=Annotation&feature=fig|6666666.640629.peg.3450&#39; target=_blank>fig|6666666.640629.peg.3450</a>	yes
A and B	Clustering-based subsystems	no subcategory	CBSS-312309.3.peg.1965	Translation elongation factor Ts	<a href=&#39;?page=Annotation&feature=fig|6666666.640627.peg.1644&#39; target=_blank>fig|6666666.640627.peg.1644</a>	yes	<a href=&#39;?page=Annotation&feature=fig|6666666.640629.peg.3452&#39; target=_blank>fig|6666666.640629.peg.3452</a>	yes
A and B	Clustering-based subsystems	no subcategory	CBSS-315749.4.peg.3658	Glycine cleavage system H protein	<a href=&#39;?page=Annotation&feature=fig|6666666.640627.peg.2418&#39; target=_blank>fig|6666666.640627.peg.2418</a>	yes	<a href=&#39;?page=Annotation&feature=fig|6666666.640629.peg.759&#39; target=_blank>fig|6666666.640629.peg.759</a>	yes
A and B	Clustering-based subsystems	no subcategory	CBSS-315749.4.peg.3658	Thioredoxin	<a href=&#39;?page=Annotation&feature=fig|6666666.640627.peg.122&#39; target=_blank>fig|6666666.640627.peg.122</a>, <a href=&#39;?page=Annotation&feature=fig|6666666.640627.peg.1267&#39; target=_blank>fig|6666666.640627.peg.1267</a>, <a href=&#39;?page=Annotation&feature=fig|6666666.640627.peg.2176&#39; target=_blank>fig|6666666.640627.peg.2176</a>, <a href=&#39;?page=Annotation&feature=fig|66666…	yes	<a href=&#39;?page=Annotation&feature=fig|6666666.640629.peg.128&#39; target=_blank>fig|6666666.640629.peg.128</a>, <a href=&#39;?page=Annotation&feature=fig|6666666.640629.peg.757&#39; target=_blank>fig|6666666.640629.peg.757</a>, <a href=&#39;?page=Annotation&feature=fig|6666666.640629.peg.1235&#39; target=_blank>fig|6666666.640629.peg.1235</a>, <a href=&#39;?page=Annotation&feature=fig|6666666…	yes
A and B	Clustering-based subsystems	no subcategory	CBSS-315749.4.peg.3658	Toprim domain protein	<a href=&#39;?page=Annotation&feature=fig|6666666.640627.peg.2417&#39; target=_blank>fig|6666666.640627.peg.2417</a>	yes	<a href=&#39;?page=Annotation&feature=fig|6666666.640629.peg.758&#39; target=_blank>fig|6666666.640629.peg.758</a>	yes
A and B	Clustering-based subsystems	no subcategory	CBSS-316057.3.peg.563	Cytochrome c oxidase polypeptide II (EC 1.9.3.1)	<a href=&#39;?page=Annotation&feature=fig|6666666.640627.peg.1488&#39; target=_blank>fig|6666666.640627.peg.1488</a>	yes	<a href=&#39;?page=Annotation&feature=fig|6666666.640629.peg.1778&#39; target=_blank>fig|6666666.640629.peg.1778</a>, <a href=&#39;?page=Annotation&feature=fig|6666666.640629.peg.2277&#39; target=_blank>fig|6666666.640629.peg.2277</a>	yes
A and B	Clustering-based subsystems	no subcategory	CBSS-316057.3.peg.563	Cytochrome c oxidase polypeptide III (EC 1.9.3.1)	<a href=&#39;?page=Annotation&feature=fig|6666666.640627.peg.1490&#39; target=_blank>fig|6666666.640627.peg.1490</a>	yes	<a href=&#39;?page=Annotation&feature=fig|6666666.640629.peg.2279&#39; target=_blank>fig|6666666.640629.peg.2279</a>	yes
A and B	Clustering-based subsystems	no subcategory	CBSS-393131.3.peg.612	Putative metallopeptidase (Zinc) SprT family	<a href=&#39;?page=Annotation&feature=fig|6666666.640627.peg.4046&#39; target=_blank>fig|6666666.640627.peg.4046</a>	yes	<a href=&#39;?page=Annotation&feature=fig|6666666.640629.peg.3679&#39; target=_blank>fig|6666666.640629.peg.3679</a>	yes
A and B	Clustering-based subsystems	no subcategory	CBSS-393131.3.peg.612	Transcription accessory protein (S1 RNA-binding domain)	<a href=&#39;?page=Annotation&feature=fig|6666666.640627.peg.4048&#39; target=_blank>fig|6666666.640627.peg.4048</a>	yes	<a href=&#39;?page=Annotation&feature=fig|6666666.640629.peg.3681&#39; target=_blank>fig|6666666.640629.peg.3681</a>	yes
A and B	Clustering-based subsystems	no subcategory	CBSS-393133.3.peg.2787	Thymidylate kinase (EC 2.7.4.9)	<a href=&#39;?page=Annotation&feature=fig|6666666.640627.peg.747&#39; target=_blank>fig|6666666.640627.peg.747</a>	yes	<a href=&#39;?page=Annotation&feature=fig|6666666.640629.peg.4304&#39; target=_blank>fig|6666666.640629.peg.4304</a>	yes
A and B	Clustering-based subsystems	no subcategory	CBSS-393133.3.peg.2787	protein from nitrogen regulatory protein P-II (GLNB) family, ortholog YAAQ B. subtilis	<a href=&#39;?page=Annotation&feature=fig|6666666.640627.peg.748&#39; target=_blank>fig|6666666.640627.peg.748</a>	yes	<a href=&#39;?page=Annotation&feature=fig|6666666.640629.peg.4303&#39; target=_blank>fig|6666666.640629.peg.4303</a>	yes
A and B	Clustering-based subsystems	no subcategory	CBSS-56780.10.peg.1536	Metal-dependent hydrolase YbeY, involved in rRNA and/or ribosome maturation and assembly	<a href=&#39;?page=Annotation&feature=fig|6666666.640627.peg.1944&#39; target=_blank>fig|6666666.640627.peg.1944</a>	yes	<a href=&#39;?page=Annotation&feature=fig|6666666.640629.peg.282&#39; target=_blank>fig|6666666.640629.peg.282</a>	yes
A and B	Clustering-based subsystems	no subcategory	CBSS-56780.10.peg.1536	Phosphate starvation-inducible protein PhoH, predicted ATPase	<a href=&#39;?page=Annotation&feature=fig|6666666.640627.peg.1946&#39; target=_blank>fig|6666666.640627.peg.1946</a>, <a href=&#39;?page=Annotation&feature=fig|6666666.640627.peg.1946&#39; target=_blank>fig|6666666.640627.peg.1946</a>	yes	<a href=&#39;?page=Annotation&feature=fig|6666666.640629.peg.281&#39; target=_blank>fig|6666666.640629.peg.281</a>, <a href=&#39;?page=Annotation&feature=fig|6666666.640629.peg.281&#39; target=_blank>fig|6666666.640629.peg.281</a>	yes
A and B	Clustering-based subsystems	no subcategory	Choline uptake and conversion to betaine clusters	Betaine aldehyde dehydrogenase (EC 1.2.1.8)	<a href=&#39;?page=Annotation&feature=fig|6666666.640627.peg.235&#39; target=_blank>fig|6666666.640627.peg.235</a>	yes	<a href=&#39;?page=Annotation&feature=fig|6666666.640629.peg.1897&#39; target=_blank>fig|6666666.640629.peg.1897</a>, <a href=&#39;?page=Annotation&feature=fig|6666666.640629.peg.1937&#39; target=_blank>fig|6666666.640629.peg.1937</a>	yes
A and B	Clustering-based subsystems	no subcategory	Choline uptake and conversion to betaine clusters	FIG009707: Betaine operon transcriptional regulator	<a href=&#39;?page=Annotation&feature=fig|6666666.640627.peg.236&#39; target=_blank>fig|6666666.640627.peg.236</a>, <a href=&#39;?page=Annotation&feature=fig|6666666.640627.peg.1249&#39; target=_blank>fig|6666666.640627.peg.1249</a>	yes	<a href=&#39;?page=Annotation&feature=fig|6666666.640629.peg.1938&#39; target=_blank>fig|6666666.640629.peg.1938</a>, <a href=&#39;?page=Annotation&feature=fig|6666666.640629.peg.2721&#39; target=_blank>fig|6666666.640629.peg.2721</a>	yes
A and B	Clustering-based subsystems	no subcategory	Choline uptake and conversion to betaine clusters	Glycine betaine ABC transport system, ATP-binding protein OpuAA (EC 3.6.3.32)	<a href=&#39;?page=Annotation&feature=fig|6666666.640627.peg.4397&#39; target=_blank>fig|6666666.640627.peg.4397</a>	yes	<a href=&#39;?page=Annotation&feature=fig|6666666.640629.peg.1394&#39; target=_blank>fig|6666666.640629.peg.1394</a>, <a href=&#39;?page=Annotation&feature=fig|6666666.640629.peg.3538&#39; target=_blank>fig|6666666.640629.peg.3538</a>	yes
A and B	Clustering-based subsystems	no subcategory	Choline uptake and conversion to betaine clusters	Glycine betaine ABC transport system, glycine betaine-binding protein OpuAC	<a href=&#39;?page=Annotation&feature=fig|6666666.640627.peg.237&#39; target=_blank>fig|6666666.640627.peg.237</a>, <a href=&#39;?page=Annotation&feature=fig|6666666.640627.peg.4398&#39; target=_blank>fig|6666666.640627.peg.4398</a>	yes	<a href=&#39;?page=Annotation&feature=fig|6666666.640629.peg.775&#39; target=_blank>fig|6666666.640629.peg.775</a>, <a href=&#39;?page=Annotation&feature=fig|6666666.640629.peg.1396&#39; target=_blank>fig|6666666.640629.peg.1396</a>, <a href=&#39;?page=Annotation&feature=fig|6666666.640629.peg.1939&#39; target=_blank>fig|6666666.640629.peg.1939</a>, <a href=&#39;?page=Annotation&feature=fig|66666…	yes
A and B	Clustering-based subsystems	no subcategory	Choline uptake and conversion to betaine clusters	Glycine betaine ABC transport system, permease protein OpuAB	<a href=&#39;?page=Annotation&feature=fig|6666666.640627.peg.4398&#39; target=_blank>fig|6666666.640627.peg.4398</a>	yes	<a href=&#39;?page=Annotation&feature=fig|6666666.640629.peg.1395&#39; target=_blank>fig|6666666.640629.peg.1395</a>, <a href=&#39;?page=Annotation&feature=fig|6666666.640629.peg.3539&#39; target=_blank>fig|6666666.640629.peg.3539</a>	yes
A and B	Clustering-based subsystems	no subcategory	DNA gyrase subunits	DNA gyrase subunit A (EC 5.99.1.3)	<a href=&#39;?page=Annotation&feature=fig|6666666.640627.peg.712&#39; target=_blank>fig|6666666.640627.peg.712</a>	yes	<a href=&#39;?page=Annotation&feature=fig|6666666.640629.peg.2932&#39; target=_blank>fig|6666666.640629.peg.2932</a>	yes
A and B	Clustering-based subsystems	no subcategory	DNA gyrase subunits	DNA gyrase subunit B (EC 5.99.1.3)	<a href=&#39;?page=Annotation&feature=fig|6666666.640627.peg.711&#39; target=_blank>fig|6666666.640627.peg.711</a>	yes	<a href=&#39;?page=Annotation&feature=fig|6666666.640629.peg.2931&#39; target=_blank>fig|6666666.640629.peg.2931</a>	yes
A and B	Clustering-based subsystems	no subcategory	DNA replication cluster 1	Chromosomal replication initiator protein DnaA	<a href=&#39;?page=Annotation&feature=fig|6666666.640627.peg.706&#39; target=_blank>fig|6666666.640627.peg.706</a>	yes	<a href=&#39;?page=Annotation&feature=fig|6666666.640629.peg.2926&#39; target=_blank>fig|6666666.640629.peg.2926</a>	yes
A and B	Clustering-based subsystems	no subcategory	DNA replication cluster 1	DNA gyrase subunit A (EC 5.99.1.3)	<a href=&#39;?page=Annotation&feature=fig|6666666.640627.peg.712&#39; target=_blank>fig|6666666.640627.peg.712</a>	yes	<a href=&#39;?page=Annotation&feature=fig|6666666.640629.peg.2932&#39; target=_blank>fig|6666666.640629.peg.2932</a>	yes
A and B	Clustering-based subsystems	no subcategory	DNA replication cluster 1	DNA gyrase subunit B (EC 5.99.1.3)	<a href=&#39;?page=Annotation&feature=fig|6666666.640627.peg.711&#39; target=_blank>fig|6666666.640627.peg.711</a>	yes	<a href=&#39;?page=Annotation&feature=fig|6666666.640629.peg.2931&#39; target=_blank>fig|6666666.640629.peg.2931</a>	yes
A and B	Clustering-based subsystems	no subcategory	DNA replication cluster 1	DNA polymerase III beta subunit (EC 2.7.7.7)	<a href=&#39;?page=Annotation&feature=fig|6666666.640627.peg.707&#39; target=_blank>fig|6666666.640627.peg.707</a>	yes	<a href=&#39;?page=Annotation&feature=fig|6666666.640629.peg.2927&#39; target=_blank>fig|6666666.640629.peg.2927</a>	yes
A and B	Clustering-based subsystems	no subcategory	DNA replication cluster 1	DNA recombination and repair protein RecF	<a href=&#39;?page=Annotation&feature=fig|6666666.640627.peg.709&#39; target=_blank>fig|6666666.640627.peg.709</a>	yes	<a href=&#39;?page=Annotation&feature=fig|6666666.640629.peg.2929&#39; target=_blank>fig|6666666.640629.peg.2929</a>	yes
A and B	Clustering-based subsystems	no subcategory	DNA replication cluster 1	OrfX	<a href=&#39;?page=Annotation&feature=fig|6666666.640627.peg.710&#39; target=_blank>fig|6666666.640627.peg.710</a>	yes	<a href=&#39;?page=Annotation&feature=fig|6666666.640629.peg.2930&#39; target=_blank>fig|6666666.640629.peg.2930</a>	yes
A and B	Clustering-based subsystems	no subcategory	DNA replication cluster 1	Ribosome-associated heat shock protein implicated in the recycling of the 50S subunit (S4 paralog)	<a href=&#39;?page=Annotation&feature=fig|6666666.640627.peg.778&#39; target=_blank>fig|6666666.640627.peg.778</a>	yes	<a href=&#39;?page=Annotation&feature=fig|6666666.640629.peg.4272&#39; target=_blank>fig|6666666.640629.peg.4272</a>	yes
A and B	Clustering-based subsystems	no subcategory	EC699-706	Allophanate hydrolase 2 subunit 1 (EC 3.5.1.54)	<a href=&#39;?page=Annotation&feature=fig|6666666.640627.peg.482&#39; target=_blank>fig|6666666.640627.peg.482</a>	yes	<a href=&#39;?page=Annotation&feature=fig|6666666.640629.peg.3220&#39; target=_blank>fig|6666666.640629.peg.3220</a>	yes
A and B	Clustering-based subsystems	no subcategory	EC699-706	Allophanate hydrolase 2 subunit 2 (EC 3.5.1.54)	<a href=&#39;?page=Annotation&feature=fig|6666666.640627.peg.480&#39; target=_blank>fig|6666666.640627.peg.480</a>	yes	<a href=&#39;?page=Annotation&feature=fig|6666666.640629.peg.3219&#39; target=_blank>fig|6666666.640629.peg.3219</a>	yes
A and B	Clustering-based subsystems	no subcategory	EC699-706	Lactam utilization protein LamB	<a href=&#39;?page=Annotation&feature=fig|6666666.640627.peg.481&#39; target=_blank>fig|6666666.640627.peg.481</a>	yes	<a href=&#39;?page=Annotation&feature=fig|6666666.640629.peg.3218&#39; target=_blank>fig|6666666.640629.peg.3218</a>	yes
A and B	Clustering-based subsystems	no subcategory	Glycyl-tRNA synthetase containing cluster	DNA recombination and repair protein RecO	<a href=&#39;?page=Annotation&feature=fig|6666666.640627.peg.1940&#39; target=_blank>fig|6666666.640627.peg.1940</a>	yes	<a href=&#39;?page=Annotation&feature=fig|6666666.640629.peg.286&#39; target=_blank>fig|6666666.640629.peg.286</a>	yes
A and B	Clustering-based subsystems	no subcategory	Glycyl-tRNA synthetase containing cluster	GTP-binding protein Era	<a href=&#39;?page=Annotation&feature=fig|6666666.640627.peg.1942&#39; target=_blank>fig|6666666.640627.peg.1942</a>	yes	<a href=&#39;?page=Annotation&feature=fig|6666666.640629.peg.284&#39; target=_blank>fig|6666666.640629.peg.284</a>	yes
A and B	Clustering-based subsystems	no subcategory	Glycyl-tRNA synthetase containing cluster	Glycyl-tRNA synthetase alpha chain (EC 6.1.1.14)	<a href=&#39;?page=Annotation&feature=fig|6666666.640627.peg.1939&#39; target=_blank>fig|6666666.640627.peg.1939</a>	yes	<a href=&#39;?page=Annotation&feature=fig|6666666.640629.peg.287&#39; target=_blank>fig|6666666.640629.peg.287</a>	yes
A and B	Clustering-based subsystems	no subcategory	Glycyl-tRNA synthetase containing cluster	Glycyl-tRNA synthetase beta chain (EC 6.1.1.14)	<a href=&#39;?page=Annotation&feature=fig|6666666.640627.peg.1938&#39; target=_blank>fig|6666666.640627.peg.1938</a>	yes	<a href=&#39;?page=Annotation&feature=fig|6666666.640629.peg.288&#39; target=_blank>fig|6666666.640629.peg.288</a>	yes
A and B	Clustering-based subsystems	no subcategory	Glycyl-tRNA synthetase containing cluster	Metal-dependent hydrolase YbeY, involved in rRNA and/or ribosome maturation and assembly	<a href=&#39;?page=Annotation&feature=fig|6666666.640627.peg.1944&#39; target=_blank>fig|6666666.640627.peg.1944</a>	yes	<a href=&#39;?page=Annotation&feature=fig|6666666.640629.peg.282&#39; target=_blank>fig|6666666.640629.peg.282</a>	yes
A and B	Clustering-based subsystems	no subcategory	Glycyl-tRNA synthetase containing cluster	Phosphate starvation-inducible protein PhoH, predicted ATPase	<a href=&#39;?page=Annotation&feature=fig|6666666.640627.peg.1946&#39; target=_blank>fig|6666666.640627.peg.1946</a>	yes	<a href=&#39;?page=Annotation&feature=fig|6666666.640629.peg.281&#39; target=_blank>fig|6666666.640629.peg.281</a>	yes
A and B	Clustering-based subsystems	no subcategory	KH domain RNA binding protein YlqC	16S rRNA processing protein RimM	<a href=&#39;?page=Annotation&feature=fig|6666666.640627.peg.1590&#39; target=_blank>fig|6666666.640627.peg.1590</a>	yes	<a href=&#39;?page=Annotation&feature=fig|6666666.640629.peg.3397&#39; target=_blank>fig|6666666.640629.peg.3397</a>	yes
A and B	Clustering-based subsystems	no subcategory	KH domain RNA binding protein YlqC	KH domain RNA binding protein YlqC	<a href=&#39;?page=Annotation&feature=fig|6666666.640627.peg.1588&#39; target=_blank>fig|6666666.640627.peg.1588</a>	yes	<a href=&#39;?page=Annotation&feature=fig|6666666.640629.peg.3395&#39; target=_blank>fig|6666666.640629.peg.3395</a>	yes
A and B	Clustering-based subsystems	no subcategory	KH domain RNA binding protein YlqC	SSU ribosomal protein S16p	<a href=&#39;?page=Annotation&feature=fig|6666666.640627.peg.1587&#39; target=_blank>fig|6666666.640627.peg.1587</a>	yes	<a href=&#39;?page=Annotation&feature=fig|6666666.640629.peg.3394&#39; target=_blank>fig|6666666.640629.peg.3394</a>	yes
A and B	Clustering-based subsystems	no subcategory	LMPTP YfkJ cluster	Inner membrane protein YihY, formerly thought to be RNase BN	<a href=&#39;?page=Annotation&feature=fig|6666666.640627.peg.3647&#39; target=_blank>fig|6666666.640627.peg.3647</a>	yes	<a href=&#39;?page=Annotation&feature=fig|6666666.640629.peg.3240&#39; target=_blank>fig|6666666.640629.peg.3240</a>	yes
A and B	Clustering-based subsystems	no subcategory	LMPTP YfkJ cluster	Low molecular weight protein tyrosine phosphatase (EC 3.1.3.48)	<a href=&#39;?page=Annotation&feature=fig|6666666.640627.peg.2632&#39; target=_blank>fig|6666666.640627.peg.2632</a>, <a href=&#39;?page=Annotation&feature=fig|6666666.640627.peg.3645&#39; target=_blank>fig|6666666.640627.peg.3645</a>	yes	<a href=&#39;?page=Annotation&feature=fig|6666666.640629.peg.3018&#39; target=_blank>fig|6666666.640629.peg.3018</a>, <a href=&#39;?page=Annotation&feature=fig|6666666.640629.peg.3238&#39; target=_blank>fig|6666666.640629.peg.3238</a>	yes
A and B	Clustering-based subsystems	no subcategory	NusA-TFII Cluster	COG2740: Predicted nucleic-acid-binding protein implicated in transcription termination	<a href=&#39;?page=Annotation&feature=fig|6666666.640627.peg.1653&#39; target=_blank>fig|6666666.640627.peg.1653</a>	yes	<a href=&#39;?page=Annotation&feature=fig|6666666.640629.peg.3465&#39; target=_blank>fig|6666666.640629.peg.3465</a>	yes
A and B	Clustering-based subsystems	no subcategory	NusA-TFII Cluster	Ribosome-binding factor A	<a href=&#39;?page=Annotation&feature=fig|6666666.640627.peg.1657&#39; target=_blank>fig|6666666.640627.peg.1657</a>	yes	<a href=&#39;?page=Annotation&feature=fig|6666666.640629.peg.3469&#39; target=_blank>fig|6666666.640629.peg.3469</a>	yes
A and B	Clustering-based subsystems	no subcategory	NusA-TFII Cluster	Transcription termination protein NusA	<a href=&#39;?page=Annotation&feature=fig|6666666.640627.peg.1652&#39; target=_blank>fig|6666666.640627.peg.1652</a>	yes	<a href=&#39;?page=Annotation&feature=fig|6666666.640629.peg.3464&#39; target=_blank>fig|6666666.640629.peg.3464</a>	yes
A and B	Clustering-based subsystems	no subcategory	NusA-TFII Cluster	Translation initiation factor 2	<a href=&#39;?page=Annotation&feature=fig|6666666.640627.peg.1655&#39; target=_blank>fig|6666666.640627.peg.1655</a>	yes	<a href=&#39;?page=Annotation&feature=fig|6666666.640629.peg.3467&#39; target=_blank>fig|6666666.640629.peg.3467</a>	yes
A and B	Clustering-based subsystems	no subcategory	NusA-TFII Cluster	YlxP-like protein	<a href=&#39;?page=Annotation&feature=fig|6666666.640627.peg.1656&#39; target=_blank>fig|6666666.640627.peg.1656</a>	yes	<a href=&#39;?page=Annotation&feature=fig|6666666.640629.peg.3468&#39; target=_blank>fig|6666666.640629.peg.3468</a>	yes
A and B	Clustering-based subsystems	no subcategory	Purine salvage cluster	Exodeoxyribonuclease VII large subunit (EC 3.1.11.6)	<a href=&#39;?page=Annotation&feature=fig|6666666.640627.peg.1858&#39; target=_blank>fig|6666666.640627.peg.1858</a>	yes	<a href=&#39;?page=Annotation&feature=fig|6666666.640629.peg.374&#39; target=_blank>fig|6666666.640629.peg.374</a>	yes
A and B	Clustering-based subsystems	no subcategory	Purine salvage cluster	Exodeoxyribonuclease VII small subunit (EC 3.1.11.6)	<a href=&#39;?page=Annotation&feature=fig|6666666.640627.peg.1857&#39; target=_blank>fig|6666666.640627.peg.1857</a>	yes	<a href=&#39;?page=Annotation&feature=fig|6666666.640629.peg.375&#39; target=_blank>fig|6666666.640629.peg.375</a>	yes
A and B	Clustering-based subsystems	no subcategory	Purine salvage cluster	GMP synthase [glutamine-hydrolyzing], ATP pyrophosphatase subunit (EC 6.3.5.2)	<a href=&#39;?page=Annotation&feature=fig|6666666.640627.peg.406&#39; target=_blank>fig|6666666.640627.peg.406</a>	yes	<a href=&#39;?page=Annotation&feature=fig|6666666.640629.peg.1820&#39; target=_blank>fig|6666666.640629.peg.1820</a>	yes
A and B	Clustering-based subsystems	no subcategory	Purine salvage cluster	GMP synthase [glutamine-hydrolyzing], amidotransferase subunit (EC 6.3.5.2)	<a href=&#39;?page=Annotation&feature=fig|6666666.640627.peg.406&#39; target=_blank>fig|6666666.640627.peg.406</a>	yes	<a href=&#39;?page=Annotation&feature=fig|6666666.640629.peg.1820&#39; target=_blank>fig|6666666.640629.peg.1820</a>	yes
A and B	Clustering-based subsystems	no subcategory	Purine salvage cluster	Inosine-5&#39;-monophosphate dehydrogenase (EC 1.1.1.205)	<a href=&#39;?page=Annotation&feature=fig|6666666.640627.peg.715&#39; target=_blank>fig|6666666.640627.peg.715</a>	yes	<a href=&#39;?page=Annotation&feature=fig|6666666.640629.peg.2287&#39; target=_blank>fig|6666666.640629.peg.2287</a>, <a href=&#39;?page=Annotation&feature=fig|6666666.640629.peg.2935&#39; target=_blank>fig|6666666.640629.peg.2935</a>	yes
A and B	Clustering-based subsystems	no subcategory	Ribosome recycling related cluster	Ribosome recycling factor	<a href=&#39;?page=Annotation&feature=fig|6666666.640627.peg.1646&#39; target=_blank>fig|6666666.640627.peg.1646</a>	yes	<a href=&#39;?page=Annotation&feature=fig|6666666.640629.peg.3454&#39; target=_blank>fig|6666666.640629.peg.3454</a>	yes
A and B	Clustering-based subsystems	no subcategory	Ribosome recycling related cluster	SSU ribosomal protein S2p (SAe)	<a href=&#39;?page=Annotation&feature=fig|6666666.640627.peg.1643&#39; target=_blank>fig|6666666.640627.peg.1643</a>	yes	<a href=&#39;?page=Annotation&feature=fig|6666666.640629.peg.3450&#39; target=_blank>fig|6666666.640629.peg.3450</a>	yes
A and B	Clustering-based subsystems	no subcategory	Ribosome recycling related cluster	Translation elongation factor Ts	<a href=&#39;?page=Annotation&feature=fig|6666666.640627.peg.1644&#39; target=_blank>fig|6666666.640627.peg.1644</a>	yes	<a href=&#39;?page=Annotation&feature=fig|6666666.640629.peg.3452&#39; target=_blank>fig|6666666.640629.peg.3452</a>	yes
A and B	Clustering-based subsystems	no subcategory	Sigma-B stress response cluster 1	Anti-sigma B factor RsbT	<a href=&#39;?page=Annotation&feature=fig|6666666.640627.peg.975&#39; target=_blank>fig|6666666.640627.peg.975</a>	yes	<a href=&#39;?page=Annotation&feature=fig|6666666.640629.peg.3687&#39; target=_blank>fig|6666666.640629.peg.3687</a>	yes
A and B	Clustering-based subsystems	no subcategory	Sigma-B stress response cluster 1	Anti-sigma B factor antagonist RsbV	<a href=&#39;?page=Annotation&feature=fig|6666666.640627.peg.977&#39; target=_blank>fig|6666666.640627.peg.977</a>	yes	<a href=&#39;?page=Annotation&feature=fig|6666666.640629.peg.3685&#39; target=_blank>fig|6666666.640629.peg.3685</a>	yes
A and B	Clustering-based subsystems	no subcategory	Sigma-B stress response cluster 1	Phosphoserine phosphatase RsbX (EC 3.1.3.3)	<a href=&#39;?page=Annotation&feature=fig|6666666.640627.peg.980&#39; target=_blank>fig|6666666.640627.peg.980</a>	yes	<a href=&#39;?page=Annotation&feature=fig|6666666.640629.peg.3682&#39; target=_blank>fig|6666666.640629.peg.3682</a>	yes
A and B	Clustering-based subsystems	no subcategory	Sigma-B stress response cluster 1	RNA polymerase sigma factor RpoD	<a href=&#39;?page=Annotation&feature=fig|6666666.640627.peg.1932&#39; target=_blank>fig|6666666.640627.peg.1932</a>, <a href=&#39;?page=Annotation&feature=fig|6666666.640627.peg.1933&#39; target=_blank>fig|6666666.640627.peg.1933</a>	yes	<a href=&#39;?page=Annotation&feature=fig|6666666.640629.peg.293&#39; target=_blank>fig|6666666.640629.peg.293</a>	yes
A and B	Clustering-based subsystems	no subcategory	Sigma-B stress response cluster 1	RNA polymerase sigma factor SigB	<a href=&#39;?page=Annotation&feature=fig|6666666.640627.peg.979&#39; target=_blank>fig|6666666.640627.peg.979</a>	yes	<a href=&#39;?page=Annotation&feature=fig|6666666.640629.peg.3683&#39; target=_blank>fig|6666666.640629.peg.3683</a>	yes
A and B	Clustering-based subsystems	no subcategory	Sigma-B stress response cluster 1	RsbS, negative regulator of sigma-B	<a href=&#39;?page=Annotation&feature=fig|6666666.640627.peg.974&#39; target=_blank>fig|6666666.640627.peg.974</a>	yes	<a href=&#39;?page=Annotation&feature=fig|6666666.640629.peg.3688&#39; target=_blank>fig|6666666.640629.peg.3688</a>	yes
A and B	Clustering-based subsystems	no subcategory	Sigma-B stress response cluster 1	Serine phosphatase RsbU, regulator of sigma subunit	<a href=&#39;?page=Annotation&feature=fig|6666666.640627.peg.976&#39; target=_blank>fig|6666666.640627.peg.976</a>	yes	<a href=&#39;?page=Annotation&feature=fig|6666666.640629.peg.3686&#39; target=_blank>fig|6666666.640629.peg.3686</a>	yes
A and B	Clustering-based subsystems	no subcategory	Sigma-B stress response cluster 1	Serine-protein kinase RsbW (EC 2.7.11.1)	<a href=&#39;?page=Annotation&feature=fig|6666666.640627.peg.978&#39; target=_blank>fig|6666666.640627.peg.978</a>	yes	<a href=&#39;?page=Annotation&feature=fig|6666666.640629.peg.3684&#39; target=_blank>fig|6666666.640629.peg.3684</a>	yes
A	Clustering-based subsystems	no subcategory	CBSS-176279.3.peg.1262	Foldase clustered with pyrimidine conversion	<a href=&#39;?page=Annotation&feature=fig|6666666.640627.peg.1245&#39; target=_blank>fig|6666666.640627.peg.1245</a>	yes	<input type=&#39;button&#39; class=&#39;button&#39; value=&#39;find&#39; onclick=&#39;window.open("?page=SearchGene&fr=Foldase clustered with pyrimidine conversion&organism=6666666.640629&subsystem=CBSS-176279.3.peg.1262&template_gene=fig|6666666.640627.peg.1245");&#39;>	no
A	Clustering-based subsystems	no subcategory	CBSS-1806.1.peg.3045	FIG007959: peptidase, M16 family	<a href=&#39;?page=Annotation&feature=fig|6666666.640627.peg.1663&#39; target=_blank>fig|6666666.640627.peg.1663</a>	yes	<input type=&#39;button&#39; class=&#39;button&#39; value=&#39;find&#39; onclick=&#39;window.open("?page=SearchGene&fr=FIG007959: peptidase, M16 family&organism=6666666.640629&subsystem=CBSS-1806.1.peg.3045&template_gene=fig|6666666.640627.peg.1663");&#39;>	no
A	Clustering-based subsystems	no subcategory	CBSS-221988.1.peg.1679	FIG003021: Membrane protein	<a href=&#39;?page=Annotation&feature=fig|6666666.640627.peg.3520&#39; target=_blank>fig|6666666.640627.peg.3520</a>	yes	<input type=&#39;button&#39; class=&#39;button&#39; value=&#39;find&#39; onclick=&#39;window.open("?page=SearchGene&fr=FIG003021: Membrane protein&organism=6666666.640629&subsystem=CBSS-221988.1.peg.1679&template_gene=fig|6666666.640627.peg.3520");&#39;>	no
A	Clustering-based subsystems	no subcategory	CBSS-257314.1.peg.752	Thiol peroxidase, Tpx-type (EC 1.11.1.15)	<a href=&#39;?page=Annotation&feature=fig|6666666.640627.peg.2240&#39; target=_blank>fig|6666666.640627.peg.2240</a>	yes	<input type=&#39;button&#39; class=&#39;button&#39; value=&#39;find&#39; onclick=&#39;window.open("?page=SearchGene&fr=Thiol peroxidase, Tpx-type (EC 1.11.1.15)&organism=6666666.640629&subsystem=CBSS-257314.1.peg.752&template_gene=fig|6666666.640627.peg.2240");&#39;>	no
A	Clustering-based subsystems	no subcategory	CBSS-370552.3.peg.1240	YfaA	<a href=&#39;?page=Annotation&feature=fig|6666666.640627.peg.3667&#39; target=_blank>fig|6666666.640627.peg.3667</a>	yes	<input type=&#39;button&#39; class=&#39;button&#39; value=&#39;find&#39; onclick=&#39;window.open("?page=SearchGene&fr=YfaA&organism=6666666.640629&subsystem=CBSS-370552.3.peg.1240&template_gene=fig|6666666.640627.peg.3667");&#39;>	no
A	Clustering-based subsystems	no subcategory	CBSS-56780.10.peg.1536	Membrane protein containing HD superfamily hydrolase domain, YQFF ortholog	<a href=&#39;?page=Annotation&feature=fig|6666666.640627.peg.1945&#39; target=_blank>fig|6666666.640627.peg.1945</a>	yes	<input type=&#39;button&#39; class=&#39;button&#39; value=&#39;find&#39; onclick=&#39;window.open("?page=SearchGene&fr=Membrane protein containing HD superfamily hydrolase domain, YQFF ortholog&organism=6666666.640629&subsystem=CBSS-56780.10.peg.1536&template_gene=fig|6666666.640627.peg.1945");&#39;>	no
A	Clustering-based subsystems	no subcategory	Choline uptake and conversion to betaine clusters	Glycine betaine ABC transport system, substrate binding protein OpuAC	<a href=&#39;?page=Annotation&feature=fig|6666666.640627.peg.1253&#39; target=_blank>fig|6666666.640627.peg.1253</a>	yes	<input type=&#39;button&#39; class=&#39;button&#39; value=&#39;find&#39; onclick=&#39;window.open("?page=SearchGene&fr=Glycine betaine ABC transport system, substrate binding protein OpuAC&organism=6666666.640629&subsystem=Choline_uptake_and_conversion_to_betaine_clusters&template_gene=fig|6666666.640627.peg.1253");&#39;>	no
A	Clustering-based subsystems	no subcategory	Nucleoside Catabolism cluster	D-Ribose 1,5-phosphomutase (EC 5.4.2.7)	<a href=&#39;?page=Annotation&feature=fig|6666666.640627.peg.112&#39; target=_blank>fig|6666666.640627.peg.112</a>	yes	<input type=&#39;button&#39; class=&#39;button&#39; value=&#39;find&#39; onclick=&#39;window.open("?page=SearchGene&fr=D-Ribose 1,5-phosphomutase (EC 5.4.2.7)&organism=6666666.640629&subsystem=Nucleoside_Catabolism_cluster&template_gene=fig|6666666.640627.peg.112");&#39;>	no
A	Clustering-based subsystems	no subcategory	NusA-TFII Cluster	ribosomal protein L7Ae family protein	<a href=&#39;?page=Annotation&feature=fig|6666666.640627.peg.1654&#39; target=_blank>fig|6666666.640627.peg.1654</a>	yes	<input type=&#39;button&#39; class=&#39;button&#39; value=&#39;find&#39; onclick=&#39;window.open("?page=SearchGene&fr=ribosomal protein L7Ae family protein&organism=6666666.640629&subsystem=NusA-TFII_Cluster&template_gene=fig|6666666.640627.peg.1654");&#39;>	no
B	Clustering-based subsystems	no subcategory	A DNA integrity scanning protein that co-occurs with RadA	DNA integrity scanning protein DisA	<input type=&#39;button&#39; value=&#39;find&#39; onclick=&#39;window.open("?page=SearchGene&fr=DNA integrity scanning protein DisA&organism=6666666.640627&subsystem=A_DNA_integrity_scanning_protein_that_co-occurs_with_RadA&template_gene=fig|6666666.640629.peg.4168");&#39;>	no	<a href=&#39;?page=Annotation&feature=fig|6666666.640629.peg.4168&#39; target=_blank>fig|6666666.640629.peg.4168</a>	yes
B	Clustering-based subsystems	no subcategory	CBSS-211586.9.peg.2560	Acetate permease ActP (cation/acetate symporter)	<input type=&#39;button&#39; value=&#39;find&#39; onclick=&#39;window.open("?page=SearchGene&fr=Acetate permease ActP (cation/acetate symporter)&organism=6666666.640627&subsystem=CBSS-211586.9.peg.2560&template_gene=fig|6666666.640629.peg.3101");&#39;>	no	<a href=&#39;?page=Annotation&feature=fig|6666666.640629.peg.3101&#39; target=_blank>fig|6666666.640629.peg.3101</a>	yes
B	Clustering-based subsystems	no subcategory	CBSS-211586.9.peg.2560	FIG152265: Sodium:solute symporter associated protein	<input type=&#39;button&#39; value=&#39;find&#39; onclick=&#39;window.open("?page=SearchGene&fr=FIG152265: Sodium:solute symporter associated protein&organism=6666666.640627&subsystem=CBSS-211586.9.peg.2560&template_gene=fig|6666666.640629.peg.3100");&#39;>	no	<a href=&#39;?page=Annotation&feature=fig|6666666.640629.peg.3100&#39; target=_blank>fig|6666666.640629.peg.3100</a>	yes
B	Clustering-based subsystems	no subcategory	CBSS-211586.9.peg.2560	Predicted signal-transduction protein containing cAMP-binding and CBS domains	<input type=&#39;button&#39; value=&#39;find&#39; onclick=&#39;window.open("?page=SearchGene&fr=Predicted signal-transduction protein containing cAMP-binding and CBS domains&organism=6666666.640627&subsystem=CBSS-211586.9.peg.2560&template_gene=fig|6666666.640629.peg.387");&#39;>	no	<a href=&#39;?page=Annotation&feature=fig|6666666.640629.peg.387&#39; target=_blank>fig|6666666.640629.peg.387</a>, <a href=&#39;?page=Annotation&feature=fig|6666666.640629.peg.441&#39; target=_blank>fig|6666666.640629.peg.441</a>	yes
B	Clustering-based subsystems	no subcategory	CBSS-349161.4.peg.2427	Pyruvate,phosphate dikinase (EC 2.7.9.1)	<input type=&#39;button&#39; value=&#39;find&#39; onclick=&#39;window.open("?page=SearchGene&fr=Pyruvate,phosphate dikinase (EC 2.7.9.1)&organism=6666666.640627&subsystem=CBSS-349161.4.peg.2427&template_gene=fig|6666666.640629.peg.1983");&#39;>	no	<a href=&#39;?page=Annotation&feature=fig|6666666.640629.peg.1983&#39; target=_blank>fig|6666666.640629.peg.1983</a>	yes
B	Clustering-based subsystems	no subcategory	EC699-706	FIG143828: Hypothetical protein YbgA	<input type=&#39;button&#39; value=&#39;find&#39; onclick=&#39;window.open("?page=SearchGene&fr=FIG143828: Hypothetical protein YbgA&organism=6666666.640627&subsystem=EC699-706&template_gene=fig|6666666.640629.peg.4262");&#39;>	no	<a href=&#39;?page=Annotation&feature=fig|6666666.640629.peg.4262&#39; target=_blank>fig|6666666.640629.peg.4262</a>	yes
B	Clustering-based subsystems	no subcategory	Sigma-B stress response cluster 1	RsbR, positive regulator of sigma-B	<input type=&#39;button&#39; value=&#39;find&#39; onclick=&#39;window.open("?page=SearchGene&fr=RsbR, positive regulator of sigma-B&organism=6666666.640627&subsystem=Sigma-B_stress_response_cluster_1&template_gene=fig|6666666.640629.peg.1689");&#39;>	no	<a href=&#39;?page=Annotation&feature=fig|6666666.640629.peg.1689&#39; target=_blank>fig|6666666.640629.peg.1689</a>, <a href=&#39;?page=Annotation&feature=fig|6666666.640629.peg.3596&#39; target=_blank>fig|6666666.640629.peg.3596</a>, <a href=&#39;?page=Annotation&feature=fig|6666666.640629.peg.3890&#39; target=_blank>fig|6666666.640629.peg.3890</a>	yes
A and B	Cofactors, Vitamins, Prosthetic Groups, Pigments	Biotin	Biotin biosynthesis	3-ketoacyl-CoA thiolase (EC 2.3.1.16)	<a href=&#39;?page=Annotation&feature=fig|6666666.640627.peg.305&#39; target=_blank>fig|6666666.640627.peg.305</a>, <a href=&#39;?page=Annotation&feature=fig|6666666.640627.peg.940&#39; target=_blank>fig|6666666.640627.peg.940</a>, <a href=&#39;?page=Annotation&feature=fig|6666666.640627.peg.2466&#39; target=_blank>fig|6666666.640627.peg.2466</a>	yes	<a href=&#39;?page=Annotation&feature=fig|6666666.640629.peg.1067&#39; target=_blank>fig|6666666.640629.peg.1067</a>, <a href=&#39;?page=Annotation&feature=fig|6666666.640629.peg.1090&#39; target=_blank>fig|6666666.640629.peg.1090</a>, <a href=&#39;?page=Annotation&feature=fig|6666666.640629.peg.1104&#39; target=_blank>fig|6666666.640629.peg.1104</a>, <a href=&#39;?page=Annotation&feature=fig|666…	yes
A and B	Cofactors, Vitamins, Prosthetic Groups, Pigments	Biotin	Biotin biosynthesis	Biotin operon repressor	<a href=&#39;?page=Annotation&feature=fig|6666666.640627.peg.1724&#39; target=_blank>fig|6666666.640627.peg.1724</a>	yes	<a href=&#39;?page=Annotation&feature=fig|6666666.640629.peg.2480&#39; target=_blank>fig|6666666.640629.peg.2480</a>	yes
A and B	Cofactors, Vitamins, Prosthetic Groups, Pigments	Biotin	Biotin biosynthesis	Biotin synthase (EC 2.8.1.6)	<a href=&#39;?page=Annotation&feature=fig|6666666.640627.peg.455&#39; target=_blank>fig|6666666.640627.peg.455</a>	yes	<a href=&#39;?page=Annotation&feature=fig|6666666.640629.peg.436&#39; target=_blank>fig|6666666.640629.peg.436</a>	yes
A and B	Cofactors, Vitamins, Prosthetic Groups, Pigments	Biotin	Biotin biosynthesis	Long-chain-fatty-acid--CoA ligase (EC 6.2.1.3)	<a href=&#39;?page=Annotation&feature=fig|6666666.640627.peg.101&#39; target=_blank>fig|6666666.640627.peg.101</a>, <a href=&#39;?page=Annotation&feature=fig|6666666.640627.peg.1278&#39; target=_blank>fig|6666666.640627.peg.1278</a>, <a href=&#39;?page=Annotation&feature=fig|6666666.640627.peg.2182&#39; target=_blank>fig|6666666.640627.peg.2182</a>, <a href=&#39;?page=Annotation&feature=fig|66666…	yes	<a href=&#39;?page=Annotation&feature=fig|6666666.640629.peg.123&#39; target=_blank>fig|6666666.640629.peg.123</a>, <a href=&#39;?page=Annotation&feature=fig|6666666.640629.peg.437&#39; target=_blank>fig|6666666.640629.peg.437</a>, <a href=&#39;?page=Annotation&feature=fig|6666666.640629.peg.873&#39; target=_blank>fig|6666666.640629.peg.873</a>, <a href=&#39;?page=Annotation&feature=fig|6666666.6…	yes
A and B	Cofactors, Vitamins, Prosthetic Groups, Pigments	Biotin	Biotin biosynthesis	Substrate-specific component BioY of biotin ECF transporter	<a href=&#39;?page=Annotation&feature=fig|6666666.640627.peg.454&#39; target=_blank>fig|6666666.640627.peg.454</a>, <a href=&#39;?page=Annotation&feature=fig|6666666.640627.peg.2341&#39; target=_blank>fig|6666666.640627.peg.2341</a>, <a href=&#39;?page=Annotation&feature=fig|6666666.640627.peg.3804&#39; target=_blank>fig|6666666.640627.peg.3804</a>	yes	<a href=&#39;?page=Annotation&feature=fig|6666666.640629.peg.3856&#39; target=_blank>fig|6666666.640629.peg.3856</a>, <a href=&#39;?page=Annotation&feature=fig|6666666.640629.peg.4209&#39; target=_blank>fig|6666666.640629.peg.4209</a>	yes
A and B	Cofactors, Vitamins, Prosthetic Groups, Pigments	Biotin	Biotin biosynthesis Experimental	Biotin synthase (EC 2.8.1.6)	<a href=&#39;?page=Annotation&feature=fig|6666666.640627.peg.455&#39; target=_blank>fig|6666666.640627.peg.455</a>	yes	<a href=&#39;?page=Annotation&feature=fig|6666666.640629.peg.436&#39; target=_blank>fig|6666666.640629.peg.436</a>	yes
A and B	Cofactors, Vitamins, Prosthetic Groups, Pigments	Biotin	Biotin biosynthesis Experimental	Competence protein F homolog, phosphoribosyltransferase domain	<a href=&#39;?page=Annotation&feature=fig|6666666.640627.peg.2940&#39; target=_blank>fig|6666666.640627.peg.2940</a>	yes	<a href=&#39;?page=Annotation&feature=fig|6666666.640629.peg.937&#39; target=_blank>fig|6666666.640629.peg.937</a>	yes
A	Cofactors, Vitamins, Prosthetic Groups, Pigments	Biotin	Biotin biosynthesis	Adenosylmethionine-8-amino-7-oxononanoate aminotransferase (EC 2.6.1.62)	<a href=&#39;?page=Annotation&feature=fig|6666666.640627.peg.452&#39; target=_blank>fig|6666666.640627.peg.452</a>	yes	<input type=&#39;button&#39; class=&#39;button&#39; value=&#39;find&#39; onclick=&#39;window.open("?page=SearchGene&fr=Adenosylmethionine-8-amino-7-oxononanoate aminotransferase (EC 2.6.1.62)&organism=6666666.640629&subsystem=Biotin_biosynthesis&template_gene=fig|6666666.640627.peg.452");&#39;>	no
A and B	Cofactors, Vitamins, Prosthetic Groups, Pigments	Coenzyme A	Coenzyme A Biosynthesis	2-dehydropantoate 2-reductase (EC 1.1.1.169)	<a href=&#39;?page=Annotation&feature=fig|6666666.640627.peg.1324&#39; target=_blank>fig|6666666.640627.peg.1324</a>, <a href=&#39;?page=Annotation&feature=fig|6666666.640627.peg.4339&#39; target=_blank>fig|6666666.640627.peg.4339</a>	yes	<a href=&#39;?page=Annotation&feature=fig|6666666.640629.peg.1077&#39; target=_blank>fig|6666666.640629.peg.1077</a>, <a href=&#39;?page=Annotation&feature=fig|6666666.640629.peg.2308&#39; target=_blank>fig|6666666.640629.peg.2308</a>, <a href=&#39;?page=Annotation&feature=fig|6666666.640629.peg.3228&#39; target=_blank>fig|6666666.640629.peg.3228</a>	yes
A and B	Cofactors, Vitamins, Prosthetic Groups, Pigments	Coenzyme A	Coenzyme A Biosynthesis	3-methyl-2-oxobutanoate hydroxymethyltransferase (EC 2.1.2.11)	<a href=&#39;?page=Annotation&feature=fig|6666666.640627.peg.1328&#39; target=_blank>fig|6666666.640627.peg.1328</a>	yes	<a href=&#39;?page=Annotation&feature=fig|6666666.640629.peg.2479&#39; target=_blank>fig|6666666.640629.peg.2479</a>	yes
A and B	Cofactors, Vitamins, Prosthetic Groups, Pigments	Coenzyme A	Coenzyme A Biosynthesis	Aspartate 1-decarboxylase (EC 4.1.1.11)	<a href=&#39;?page=Annotation&feature=fig|6666666.640627.peg.1326&#39; target=_blank>fig|6666666.640627.peg.1326</a>	yes	<a href=&#39;?page=Annotation&feature=fig|6666666.640629.peg.2477&#39; target=_blank>fig|6666666.640629.peg.2477</a>	yes
A and B	Cofactors, Vitamins, Prosthetic Groups, Pigments	Coenzyme A	Coenzyme A Biosynthesis	Dephospho-CoA kinase (EC 2.7.1.24)	<a href=&#39;?page=Annotation&feature=fig|6666666.640627.peg.2204&#39; target=_blank>fig|6666666.640627.peg.2204</a>	yes	<a href=&#39;?page=Annotation&feature=fig|6666666.640629.peg.95&#39; target=_blank>fig|6666666.640629.peg.95</a>	yes
A and B	Cofactors, Vitamins, Prosthetic Groups, Pigments	Coenzyme A	Coenzyme A Biosynthesis	Pantoate--beta-alanine ligase (EC 6.3.2.1)	<a href=&#39;?page=Annotation&feature=fig|6666666.640627.peg.1327&#39; target=_blank>fig|6666666.640627.peg.1327</a>	yes	<a href=&#39;?page=Annotation&feature=fig|6666666.640629.peg.2478&#39; target=_blank>fig|6666666.640629.peg.2478</a>	yes
A and B	Cofactors, Vitamins, Prosthetic Groups, Pigments	Coenzyme A	Coenzyme A Biosynthesis	Pantothenate kinase type III, CoaX-like (EC 2.7.1.33)	<a href=&#39;?page=Annotation&feature=fig|6666666.640627.peg.791&#39; target=_blank>fig|6666666.640627.peg.791</a>	yes	<a href=&#39;?page=Annotation&feature=fig|6666666.640629.peg.3820&#39; target=_blank>fig|6666666.640629.peg.3820</a>	yes
A and B	Cofactors, Vitamins, Prosthetic Groups, Pigments	Coenzyme A	Coenzyme A Biosynthesis	Pantothenate:Na+ symporter (TC 2.A.21.1.1)	<a href=&#39;?page=Annotation&feature=fig|6666666.640627.peg.3521&#39; target=_blank>fig|6666666.640627.peg.3521</a>	yes	<a href=&#39;?page=Annotation&feature=fig|6666666.640629.peg.1045&#39; target=_blank>fig|6666666.640629.peg.1045</a>, <a href=&#39;?page=Annotation&feature=fig|6666666.640629.peg.1046&#39; target=_blank>fig|6666666.640629.peg.1046</a>, <a href=&#39;?page=Annotation&feature=fig|6666666.640629.peg.1553&#39; target=_blank>fig|6666666.640629.peg.1553</a>, <a href=&#39;?page=Annotation&feature=fig|666…	yes
A and B	Cofactors, Vitamins, Prosthetic Groups, Pigments	Coenzyme A	Coenzyme A Biosynthesis	Phosphopantetheine adenylyltransferase (EC 2.7.7.3)	<a href=&#39;?page=Annotation&feature=fig|6666666.640627.peg.1502&#39; target=_blank>fig|6666666.640627.peg.1502</a>	yes	<a href=&#39;?page=Annotation&feature=fig|6666666.640629.peg.2297&#39; target=_blank>fig|6666666.640629.peg.2297</a>	yes
A and B	Cofactors, Vitamins, Prosthetic Groups, Pigments	Coenzyme A	Coenzyme A Biosynthesis	Phosphopantothenoylcysteine decarboxylase (EC 4.1.1.36)	<a href=&#39;?page=Annotation&feature=fig|6666666.640627.peg.1559&#39; target=_blank>fig|6666666.640627.peg.1559</a>	yes	<a href=&#39;?page=Annotation&feature=fig|6666666.640629.peg.2360&#39; target=_blank>fig|6666666.640629.peg.2360</a>	yes
A and B	Cofactors, Vitamins, Prosthetic Groups, Pigments	Coenzyme A	Coenzyme A Biosynthesis	Phosphopantothenoylcysteine synthetase (EC 6.3.2.5)	<a href=&#39;?page=Annotation&feature=fig|6666666.640627.peg.1559&#39; target=_blank>fig|6666666.640627.peg.1559</a>	yes	<a href=&#39;?page=Annotation&feature=fig|6666666.640629.peg.2360&#39; target=_blank>fig|6666666.640629.peg.2360</a>	yes
A and B	Cofactors, Vitamins, Prosthetic Groups, Pigments	Coenzyme A	Coenzyme A Biosynthesis cluster	3-methyl-2-oxobutanoate hydroxymethyltransferase (EC 2.1.2.11)	<a href=&#39;?page=Annotation&feature=fig|6666666.640627.peg.1328&#39; target=_blank>fig|6666666.640627.peg.1328</a>	yes	<a href=&#39;?page=Annotation&feature=fig|6666666.640629.peg.2479&#39; target=_blank>fig|6666666.640629.peg.2479</a>	yes
A and B	Cofactors, Vitamins, Prosthetic Groups, Pigments	Coenzyme A	Coenzyme A Biosynthesis cluster	Aspartate 1-decarboxylase (EC 4.1.1.11)	<a href=&#39;?page=Annotation&feature=fig|6666666.640627.peg.1326&#39; target=_blank>fig|6666666.640627.peg.1326</a>	yes	<a href=&#39;?page=Annotation&feature=fig|6666666.640629.peg.2477&#39; target=_blank>fig|6666666.640629.peg.2477</a>	yes
A and B	Cofactors, Vitamins, Prosthetic Groups, Pigments	Coenzyme A	Coenzyme A Biosynthesis cluster	Pantoate--beta-alanine ligase (EC 6.3.2.1)	<a href=&#39;?page=Annotation&feature=fig|6666666.640627.peg.1327&#39; target=_blank>fig|6666666.640627.peg.1327</a>	yes	<a href=&#39;?page=Annotation&feature=fig|6666666.640629.peg.2478&#39; target=_blank>fig|6666666.640629.peg.2478</a>	yes
A and B	Cofactors, Vitamins, Prosthetic Groups, Pigments	Coenzyme A	Coenzyme A Biosynthesis cluster	Pantothenate kinase type III, CoaX-like (EC 2.7.1.33)	<a href=&#39;?page=Annotation&feature=fig|6666666.640627.peg.791&#39; target=_blank>fig|6666666.640627.peg.791</a>	yes	<a href=&#39;?page=Annotation&feature=fig|6666666.640629.peg.3820&#39; target=_blank>fig|6666666.640629.peg.3820</a>	yes
A and B	Cofactors, Vitamins, Prosthetic Groups, Pigments	Folate and pterines	5-FCL-like protein	5,10-methylenetetrahydrofolate reductase (EC 1.5.1.20)	<a href=&#39;?page=Annotation&feature=fig|6666666.640627.peg.1020&#39; target=_blank>fig|6666666.640627.peg.1020</a>	yes	<a href=&#39;?page=Annotation&feature=fig|6666666.640629.peg.3974&#39; target=_blank>fig|6666666.640629.peg.3974</a>	yes
A and B	Cofactors, Vitamins, Prosthetic Groups, Pigments	Folate and pterines	5-FCL-like protein	5-formyltetrahydrofolate cyclo-ligase (EC 6.3.3.2)	<a href=&#39;?page=Annotation&feature=fig|6666666.640627.peg.1908&#39; target=_blank>fig|6666666.640627.peg.1908</a>	yes	<a href=&#39;?page=Annotation&feature=fig|6666666.640629.peg.320&#39; target=_blank>fig|6666666.640629.peg.320</a>	yes
A and B	Cofactors, Vitamins, Prosthetic Groups, Pigments	Folate and pterines	5-FCL-like protein	Alcohol dehydrogenase (EC 1.1.1.1)	<a href=&#39;?page=Annotation&feature=fig|6666666.640627.peg.1410&#39; target=_blank>fig|6666666.640627.peg.1410</a>, <a href=&#39;?page=Annotation&feature=fig|6666666.640627.peg.3998&#39; target=_blank>fig|6666666.640627.peg.3998</a>	yes	<a href=&#39;?page=Annotation&feature=fig|6666666.640629.peg.2416&#39; target=_blank>fig|6666666.640629.peg.2416</a>, <a href=&#39;?page=Annotation&feature=fig|6666666.640629.peg.2734&#39; target=_blank>fig|6666666.640629.peg.2734</a>	yes
A and B	Cofactors, Vitamins, Prosthetic Groups, Pigments	Folate and pterines	5-FCL-like protein	Dihydrofolate reductase (EC 1.5.1.3)	<a href=&#39;?page=Annotation&feature=fig|6666666.640627.peg.2846&#39; target=_blank>fig|6666666.640627.peg.2846</a>, <a href=&#39;?page=Annotation&feature=fig|6666666.640627.peg.2881&#39; target=_blank>fig|6666666.640627.peg.2881</a>	yes	<a href=&#39;?page=Annotation&feature=fig|6666666.640629.peg.1990&#39; target=_blank>fig|6666666.640629.peg.1990</a>, <a href=&#39;?page=Annotation&feature=fig|6666666.640629.peg.2444&#39; target=_blank>fig|6666666.640629.peg.2444</a>	yes
A and B	Cofactors, Vitamins, Prosthetic Groups, Pigments	Folate and pterines	5-FCL-like protein	Dihydrolipoamide acetyltransferase component of pyruvate dehydrogenase complex (EC 2.3.1.12)	<a href=&#39;?page=Annotation&feature=fig|6666666.640627.peg.625&#39; target=_blank>fig|6666666.640627.peg.625</a>, <a href=&#39;?page=Annotation&feature=fig|6666666.640627.peg.1463&#39; target=_blank>fig|6666666.640627.peg.1463</a>	yes	<a href=&#39;?page=Annotation&feature=fig|6666666.640629.peg.2252&#39; target=_blank>fig|6666666.640629.peg.2252</a>	yes
A and B	Cofactors, Vitamins, Prosthetic Groups, Pigments	Folate and pterines	5-FCL-like protein	Formyltetrahydrofolate deformylase (EC 3.5.1.10)	<a href=&#39;?page=Annotation&feature=fig|6666666.640627.peg.4025&#39; target=_blank>fig|6666666.640627.peg.4025</a>	yes	<a href=&#39;?page=Annotation&feature=fig|6666666.640629.peg.3266&#39; target=_blank>fig|6666666.640629.peg.3266</a>	yes
A and B	Cofactors, Vitamins, Prosthetic Groups, Pigments	Folate and pterines	5-FCL-like protein	Hydroxyethylthiazole kinase (EC 2.7.1.50)	<a href=&#39;?page=Annotation&feature=fig|6666666.640627.peg.3485&#39; target=_blank>fig|6666666.640627.peg.3485</a>	yes	<a href=&#39;?page=Annotation&feature=fig|6666666.640629.peg.4316&#39; target=_blank>fig|6666666.640629.peg.4316</a>	yes
A and B	Cofactors, Vitamins, Prosthetic Groups, Pigments	Folate and pterines	5-FCL-like protein	Isocitrate dehydrogenase [NADP] (EC 1.1.1.42)	<a href=&#39;?page=Annotation&feature=fig|6666666.640627.peg.2211&#39; target=_blank>fig|6666666.640627.peg.2211</a>	yes	<a href=&#39;?page=Annotation&feature=fig|6666666.640629.peg.84&#39; target=_blank>fig|6666666.640629.peg.84</a>	yes
A and B	Cofactors, Vitamins, Prosthetic Groups, Pigments	Folate and pterines	5-FCL-like protein	Methylenetetrahydrofolate dehydrogenase (NADP+) (EC 1.5.1.5)	<a href=&#39;?page=Annotation&feature=fig|6666666.640627.peg.1859&#39; target=_blank>fig|6666666.640627.peg.1859</a>	yes	<a href=&#39;?page=Annotation&feature=fig|6666666.640629.peg.373&#39; target=_blank>fig|6666666.640629.peg.373</a>	yes
A and B	Cofactors, Vitamins, Prosthetic Groups, Pigments	Folate and pterines	5-FCL-like protein	Phosphoribosylaminoimidazolecarboxamide formyltransferase (EC 2.1.2.3)	<a href=&#39;?page=Annotation&feature=fig|6666666.640627.peg.3978&#39; target=_blank>fig|6666666.640627.peg.3978</a>	yes	<a href=&#39;?page=Annotation&feature=fig|6666666.640629.peg.1805&#39; target=_blank>fig|6666666.640629.peg.1805</a>	yes
A and B	Cofactors, Vitamins, Prosthetic Groups, Pigments	Folate and pterines	5-FCL-like protein	Phosphoribosylglycinamide formyltransferase (EC 2.1.2.2)	<a href=&#39;?page=Annotation&feature=fig|6666666.640627.peg.3979&#39; target=_blank>fig|6666666.640627.peg.3979</a>	yes	<a href=&#39;?page=Annotation&feature=fig|6666666.640629.peg.1806&#39; target=_blank>fig|6666666.640629.peg.1806</a>	yes
A and B	Cofactors, Vitamins, Prosthetic Groups, Pigments	Folate and pterines	5-FCL-like protein	Serine hydroxymethyltransferase (EC 2.1.2.1)	<a href=&#39;?page=Annotation&feature=fig|6666666.640627.peg.2628&#39; target=_blank>fig|6666666.640627.peg.2628</a>	yes	<a href=&#39;?page=Annotation&feature=fig|6666666.640629.peg.3021&#39; target=_blank>fig|6666666.640629.peg.3021</a>	yes
A and B	Cofactors, Vitamins, Prosthetic Groups, Pigments	Folate and pterines	5-FCL-like protein	Substrate-specific component ThiW of predicted thiazole ECF transporter	<a href=&#39;?page=Annotation&feature=fig|6666666.640627.peg.3488&#39; target=_blank>fig|6666666.640627.peg.3488</a>	yes	<a href=&#39;?page=Annotation&feature=fig|6666666.640629.peg.4313&#39; target=_blank>fig|6666666.640629.peg.4313</a>	yes
A and B	Cofactors, Vitamins, Prosthetic Groups, Pigments	Folate and pterines	5-FCL-like protein	Thiamin-phosphate pyrophosphorylase (EC 2.5.1.3)	<a href=&#39;?page=Annotation&feature=fig|6666666.640627.peg.3452&#39; target=_blank>fig|6666666.640627.peg.3452</a>, <a href=&#39;?page=Annotation&feature=fig|6666666.640627.peg.3484&#39; target=_blank>fig|6666666.640627.peg.3484</a>	yes	<a href=&#39;?page=Annotation&feature=fig|6666666.640629.peg.2651&#39; target=_blank>fig|6666666.640629.peg.2651</a>, <a href=&#39;?page=Annotation&feature=fig|6666666.640629.peg.4317&#39; target=_blank>fig|6666666.640629.peg.4317</a>	yes
A and B	Cofactors, Vitamins, Prosthetic Groups, Pigments	Folate and pterines	5-FCL-like protein	Thiamine-monophosphate kinase (EC 2.7.4.16)	<a href=&#39;?page=Annotation&feature=fig|6666666.640627.peg.982&#39; target=_blank>fig|6666666.640627.peg.982</a>	yes	<a href=&#39;?page=Annotation&feature=fig|6666666.640629.peg.4015&#39; target=_blank>fig|6666666.640629.peg.4015</a>	yes
A and B	Cofactors, Vitamins, Prosthetic Groups, Pigments	Folate and pterines	Folate Biosynthesis	2-amino-4-hydroxy-6-hydroxymethyldihydropteridine pyrophosphokinase (EC 2.7.6.3)	<a href=&#39;?page=Annotation&feature=fig|6666666.640627.peg.797&#39; target=_blank>fig|6666666.640627.peg.797</a>	yes	<a href=&#39;?page=Annotation&feature=fig|6666666.640629.peg.3826&#39; target=_blank>fig|6666666.640629.peg.3826</a>	yes
A and B	Cofactors, Vitamins, Prosthetic Groups, Pigments	Folate and pterines	Folate Biosynthesis	5-formyltetrahydrofolate cyclo-ligase (EC 6.3.3.2)	<a href=&#39;?page=Annotation&feature=fig|6666666.640627.peg.1908&#39; target=_blank>fig|6666666.640627.peg.1908</a>	yes	<a href=&#39;?page=Annotation&feature=fig|6666666.640629.peg.320&#39; target=_blank>fig|6666666.640629.peg.320</a>	yes
A and B	Cofactors, Vitamins, Prosthetic Groups, Pigments	Folate and pterines	Folate Biosynthesis	Aminodeoxychorismate lyase (EC 4.1.3.38)	<a href=&#39;?page=Annotation&feature=fig|6666666.640627.peg.3168&#39; target=_blank>fig|6666666.640627.peg.3168</a>	yes	<a href=&#39;?page=Annotation&feature=fig|6666666.640629.peg.3892&#39; target=_blank>fig|6666666.640629.peg.3892</a>	yes
A and B	Cofactors, Vitamins, Prosthetic Groups, Pigments	Folate and pterines	Folate Biosynthesis	Dihydrofolate reductase (EC 1.5.1.3)	<a href=&#39;?page=Annotation&feature=fig|6666666.640627.peg.2846&#39; target=_blank>fig|6666666.640627.peg.2846</a>, <a href=&#39;?page=Annotation&feature=fig|6666666.640627.peg.2881&#39; target=_blank>fig|6666666.640627.peg.2881</a>	yes	<a href=&#39;?page=Annotation&feature=fig|6666666.640629.peg.1990&#39; target=_blank>fig|6666666.640629.peg.1990</a>, <a href=&#39;?page=Annotation&feature=fig|6666666.640629.peg.2444&#39; target=_blank>fig|6666666.640629.peg.2444</a>	yes
A and B	Cofactors, Vitamins, Prosthetic Groups, Pigments	Folate and pterines	Folate Biosynthesis	Dihydrofolate synthase (EC 6.3.2.12)	<a href=&#39;?page=Annotation&feature=fig|6666666.640627.peg.2070&#39; target=_blank>fig|6666666.640627.peg.2070</a>	yes	<a href=&#39;?page=Annotation&feature=fig|6666666.640629.peg.166&#39; target=_blank>fig|6666666.640629.peg.166</a>	yes
A and B	Cofactors, Vitamins, Prosthetic Groups, Pigments	Folate and pterines	Folate Biosynthesis	Dihydroneopterin aldolase (EC 4.1.2.25)	<a href=&#39;?page=Annotation&feature=fig|6666666.640627.peg.796&#39; target=_blank>fig|6666666.640627.peg.796</a>	yes	<a href=&#39;?page=Annotation&feature=fig|6666666.640629.peg.3825&#39; target=_blank>fig|6666666.640629.peg.3825</a>	yes
A and B	Cofactors, Vitamins, Prosthetic Groups, Pigments	Folate and pterines	Folate Biosynthesis	Dihydropteroate synthase (EC 2.5.1.15)	<a href=&#39;?page=Annotation&feature=fig|6666666.640627.peg.795&#39; target=_blank>fig|6666666.640627.peg.795</a>	yes	<a href=&#39;?page=Annotation&feature=fig|6666666.640629.peg.3824&#39; target=_blank>fig|6666666.640629.peg.3824</a>	yes
A and B	Cofactors, Vitamins, Prosthetic Groups, Pigments	Folate and pterines	Folate Biosynthesis	Folylpolyglutamate synthase (EC 6.3.2.17)	<a href=&#39;?page=Annotation&feature=fig|6666666.640627.peg.2070&#39; target=_blank>fig|6666666.640627.peg.2070</a>	yes	<a href=&#39;?page=Annotation&feature=fig|6666666.640629.peg.166&#39; target=_blank>fig|6666666.640629.peg.166</a>	yes
A and B	Cofactors, Vitamins, Prosthetic Groups, Pigments	Folate and pterines	Folate Biosynthesis	GTP cyclohydrolase I (EC 3.5.4.16) type 2	<a href=&#39;?page=Annotation&feature=fig|6666666.640627.peg.4395&#39; target=_blank>fig|6666666.640627.peg.4395</a>	yes	<a href=&#39;?page=Annotation&feature=fig|6666666.640629.peg.3536&#39; target=_blank>fig|6666666.640629.peg.3536</a>	yes
A and B	Cofactors, Vitamins, Prosthetic Groups, Pigments	Folate and pterines	Folate Biosynthesis	Para-aminobenzoate synthase, amidotransferase component (EC 2.6.1.85)	<a href=&#39;?page=Annotation&feature=fig|6666666.640627.peg.3167&#39; target=_blank>fig|6666666.640627.peg.3167</a>	yes	<a href=&#39;?page=Annotation&feature=fig|6666666.640629.peg.3307&#39; target=_blank>fig|6666666.640629.peg.3307</a>	yes
A and B	Cofactors, Vitamins, Prosthetic Groups, Pigments	Folate and pterines	Folate Biosynthesis	Para-aminobenzoate synthase, aminase component (EC 2.6.1.85)	<a href=&#39;?page=Annotation&feature=fig|6666666.640627.peg.3168&#39; target=_blank>fig|6666666.640627.peg.3168</a>	yes	<a href=&#39;?page=Annotation&feature=fig|6666666.640629.peg.3892&#39; target=_blank>fig|6666666.640629.peg.3892</a>	yes
A and B	Cofactors, Vitamins, Prosthetic Groups, Pigments	Folate and pterines	Folate Biosynthesis	Thymidylate synthase (EC 2.1.1.45)	<a href=&#39;?page=Annotation&feature=fig|6666666.640627.peg.2845&#39; target=_blank>fig|6666666.640627.peg.2845</a>	yes	<a href=&#39;?page=Annotation&feature=fig|6666666.640629.peg.2445&#39; target=_blank>fig|6666666.640629.peg.2445</a>	yes
A and B	Cofactors, Vitamins, Prosthetic Groups, Pigments	Folate and pterines	Folate biosynthesis cluster	2-amino-4-hydroxy-6-hydroxymethyldihydropteridine pyrophosphokinase (EC 2.7.6.3)	<a href=&#39;?page=Annotation&feature=fig|6666666.640627.peg.797&#39; target=_blank>fig|6666666.640627.peg.797</a>	yes	<a href=&#39;?page=Annotation&feature=fig|6666666.640629.peg.3826&#39; target=_blank>fig|6666666.640629.peg.3826</a>	yes
A and B	Cofactors, Vitamins, Prosthetic Groups, Pigments	Folate and pterines	Folate biosynthesis cluster	Aspartate 1-decarboxylase (EC 4.1.1.11)	<a href=&#39;?page=Annotation&feature=fig|6666666.640627.peg.1326&#39; target=_blank>fig|6666666.640627.peg.1326</a>	yes	<a href=&#39;?page=Annotation&feature=fig|6666666.640629.peg.2477&#39; target=_blank>fig|6666666.640629.peg.2477</a>	yes
A and B	Cofactors, Vitamins, Prosthetic Groups, Pigments	Folate and pterines	Folate biosynthesis cluster	Dihydroneopterin aldolase (EC 4.1.2.25)	<a href=&#39;?page=Annotation&feature=fig|6666666.640627.peg.796&#39; target=_blank>fig|6666666.640627.peg.796</a>	yes	<a href=&#39;?page=Annotation&feature=fig|6666666.640629.peg.3825&#39; target=_blank>fig|6666666.640629.peg.3825</a>	yes
A and B	Cofactors, Vitamins, Prosthetic Groups, Pigments	Folate and pterines	Folate biosynthesis cluster	Dihydropteroate synthase (EC 2.5.1.15)	<a href=&#39;?page=Annotation&feature=fig|6666666.640627.peg.795&#39; target=_blank>fig|6666666.640627.peg.795</a>	yes	<a href=&#39;?page=Annotation&feature=fig|6666666.640629.peg.3824&#39; target=_blank>fig|6666666.640629.peg.3824</a>	yes
A and B	Cofactors, Vitamins, Prosthetic Groups, Pigments	Folate and pterines	Folate biosynthesis cluster	Hypoxanthine-guanine phosphoribosyltransferase (EC 2.4.2.8)	<a href=&#39;?page=Annotation&feature=fig|6666666.640627.peg.789&#39; target=_blank>fig|6666666.640627.peg.789</a>	yes	<a href=&#39;?page=Annotation&feature=fig|6666666.640629.peg.3818&#39; target=_blank>fig|6666666.640629.peg.3818</a>	yes
A and B	Cofactors, Vitamins, Prosthetic Groups, Pigments	Folate and pterines	Folate biosynthesis cluster	Pantoate--beta-alanine ligase (EC 6.3.2.1)	<a href=&#39;?page=Annotation&feature=fig|6666666.640627.peg.1327&#39; target=_blank>fig|6666666.640627.peg.1327</a>	yes	<a href=&#39;?page=Annotation&feature=fig|6666666.640629.peg.2478&#39; target=_blank>fig|6666666.640629.peg.2478</a>	yes
A and B	Cofactors, Vitamins, Prosthetic Groups, Pigments	Folate and pterines	Folate biosynthesis cluster	tRNA(Ile)-lysidine synthetase (EC 6.3.4.19)	<a href=&#39;?page=Annotation&feature=fig|6666666.640627.peg.788&#39; target=_blank>fig|6666666.640627.peg.788</a>	yes	<a href=&#39;?page=Annotation&feature=fig|6666666.640629.peg.3817&#39; target=_blank>fig|6666666.640629.peg.3817</a>	yes
A and B	Cofactors, Vitamins, Prosthetic Groups, Pigments	Folate and pterines	Folate biosynthesis cluster	transmembrane protein, distant homology with ydbS	<a href=&#39;?page=Annotation&feature=fig|6666666.640627.peg.3332&#39; target=_blank>fig|6666666.640627.peg.3332</a>	yes	<a href=&#39;?page=Annotation&feature=fig|6666666.640629.peg.1296&#39; target=_blank>fig|6666666.640629.peg.1296</a>	yes
A	Cofactors, Vitamins, Prosthetic Groups, Pigments	Folate and pterines	5-FCL-like protein	Formate--tetrahydrofolate ligase (EC 6.3.4.3)	<a href=&#39;?page=Annotation&feature=fig|6666666.640627.peg.2842&#39; target=_blank>fig|6666666.640627.peg.2842</a>	yes	<input type=&#39;button&#39; class=&#39;button&#39; value=&#39;find&#39; onclick=&#39;window.open("?page=SearchGene&fr=Formate--tetrahydrofolate ligase (EC 6.3.4.3)&organism=6666666.640629&subsystem=5-FCL-like_protein&template_gene=fig|6666666.640627.peg.2842");&#39;>	no
B	Cofactors, Vitamins, Prosthetic Groups, Pigments	Folate and pterines	Pterin carbinolamine dehydratase	Pterin-4-alpha-carbinolamine dehydratase (EC 4.2.1.96)	<input type=&#39;button&#39; value=&#39;find&#39; onclick=&#39;window.open("?page=SearchGene&fr=Pterin-4-alpha-carbinolamine dehydratase (EC 4.2.1.96)&organism=6666666.640627&subsystem=Pterin_carbinolamine_dehydratase&template_gene=fig|6666666.640629.peg.3274");&#39;>	no	<a href=&#39;?page=Annotation&feature=fig|6666666.640629.peg.3274&#39; target=_blank>fig|6666666.640629.peg.3274</a>	yes
A and B	Cofactors, Vitamins, Prosthetic Groups, Pigments	Lipoic acid	Lipoic acid metabolism	Lipoate-protein ligase A	<a href=&#39;?page=Annotation&feature=fig|6666666.640627.peg.1277&#39; target=_blank>fig|6666666.640627.peg.1277</a>	yes	<a href=&#39;?page=Annotation&feature=fig|6666666.640629.peg.1287&#39; target=_blank>fig|6666666.640629.peg.1287</a>, <a href=&#39;?page=Annotation&feature=fig|6666666.640629.peg.1421&#39; target=_blank>fig|6666666.640629.peg.1421</a>	yes
A and B	Cofactors, Vitamins, Prosthetic Groups, Pigments	NAD and NADP	NAD and NADP cofactor biosynthesis global	ADP-ribose pyrophosphatase (EC 3.6.1.13)	<a href=&#39;?page=Annotation&feature=fig|6666666.640627.peg.1823&#39; target=_blank>fig|6666666.640627.peg.1823</a>	yes	<a href=&#39;?page=Annotation&feature=fig|6666666.640629.peg.2588&#39; target=_blank>fig|6666666.640629.peg.2588</a>	yes
A and B	Cofactors, Vitamins, Prosthetic Groups, Pigments	NAD and NADP	NAD and NADP cofactor biosynthesis global	Kynureninase (EC 3.7.1.3)	<a href=&#39;?page=Annotation&feature=fig|6666666.640627.peg.4053&#39; target=_blank>fig|6666666.640627.peg.4053</a>	yes	<a href=&#39;?page=Annotation&feature=fig|6666666.640629.peg.4341&#39; target=_blank>fig|6666666.640629.peg.4341</a>	yes
A and B	Cofactors, Vitamins, Prosthetic Groups, Pigments	NAD and NADP	NAD and NADP cofactor biosynthesis global	Kynurenine formamidase, bacterial (EC 3.5.1.9)	<a href=&#39;?page=Annotation&feature=fig|6666666.640627.peg.4052&#39; target=_blank>fig|6666666.640627.peg.4052</a>	yes	<a href=&#39;?page=Annotation&feature=fig|6666666.640629.peg.4342&#39; target=_blank>fig|6666666.640629.peg.4342</a>	yes
A and B	Cofactors, Vitamins, Prosthetic Groups, Pigments	NAD and NADP	NAD and NADP cofactor biosynthesis global	L-aspartate oxidase (EC 1.4.3.16)	<a href=&#39;?page=Annotation&feature=fig|6666666.640627.peg.3515&#39; target=_blank>fig|6666666.640627.peg.3515</a>	yes	<a href=&#39;?page=Annotation&feature=fig|6666666.640629.peg.3991&#39; target=_blank>fig|6666666.640629.peg.3991</a>	yes
A and B	Cofactors, Vitamins, Prosthetic Groups, Pigments	NAD and NADP	NAD and NADP cofactor biosynthesis global	N-Ribosylnicotinamide phosphorylase (EC 2.4.2.1)	<a href=&#39;?page=Annotation&feature=fig|6666666.640627.peg.1816&#39; target=_blank>fig|6666666.640627.peg.1816</a>	yes	<a href=&#39;?page=Annotation&feature=fig|6666666.640629.peg.2581&#39; target=_blank>fig|6666666.640629.peg.2581</a>	yes
A and B	Cofactors, Vitamins, Prosthetic Groups, Pigments	NAD and NADP	NAD and NADP cofactor biosynthesis global	NAD kinase (EC 2.7.1.23)	<a href=&#39;?page=Annotation&feature=fig|6666666.640627.peg.1344&#39; target=_blank>fig|6666666.640627.peg.1344</a>, <a href=&#39;?page=Annotation&feature=fig|6666666.640627.peg.2243&#39; target=_blank>fig|6666666.640627.peg.2243</a>	yes	<a href=&#39;?page=Annotation&feature=fig|6666666.640629.peg.51&#39; target=_blank>fig|6666666.640629.peg.51</a>, <a href=&#39;?page=Annotation&feature=fig|6666666.640629.peg.1489&#39; target=_blank>fig|6666666.640629.peg.1489</a>	yes
A and B	Cofactors, Vitamins, Prosthetic Groups, Pigments	NAD and NADP	NAD and NADP cofactor biosynthesis global	NAD synthetase (EC 6.3.1.5)	<a href=&#39;?page=Annotation&feature=fig|6666666.640627.peg.2045&#39; target=_blank>fig|6666666.640627.peg.2045</a>	yes	<a href=&#39;?page=Annotation&feature=fig|6666666.640629.peg.190&#39; target=_blank>fig|6666666.640629.peg.190</a>, <a href=&#39;?page=Annotation&feature=fig|6666666.640629.peg.3279&#39; target=_blank>fig|6666666.640629.peg.3279</a>	yes
A and B	Cofactors, Vitamins, Prosthetic Groups, Pigments	NAD and NADP	NAD and NADP cofactor biosynthesis global	Nicotinamidase (EC 3.5.1.19)	<a href=&#39;?page=Annotation&feature=fig|6666666.640627.peg.4345&#39; target=_blank>fig|6666666.640627.peg.4345</a>	yes	<a href=&#39;?page=Annotation&feature=fig|6666666.640629.peg.3877&#39; target=_blank>fig|6666666.640629.peg.3877</a>	yes
A and B	Cofactors, Vitamins, Prosthetic Groups, Pigments	NAD and NADP	NAD and NADP cofactor biosynthesis global	Nicotinate-nucleotide adenylyltransferase (EC 2.7.7.18)	<a href=&#39;?page=Annotation&feature=fig|6666666.640627.peg.1979&#39; target=_blank>fig|6666666.640627.peg.1979</a>	yes	<a href=&#39;?page=Annotation&feature=fig|6666666.640629.peg.250&#39; target=_blank>fig|6666666.640629.peg.250</a>	yes
A and B	Cofactors, Vitamins, Prosthetic Groups, Pigments	NAD and NADP	NAD and NADP cofactor biosynthesis global	Quinolinate phosphoribosyltransferase [decarboxylating] (EC 2.4.2.19)	<a href=&#39;?page=Annotation&feature=fig|6666666.640627.peg.3514&#39; target=_blank>fig|6666666.640627.peg.3514</a>	yes	<a href=&#39;?page=Annotation&feature=fig|6666666.640629.peg.3990&#39; target=_blank>fig|6666666.640629.peg.3990</a>	yes
A and B	Cofactors, Vitamins, Prosthetic Groups, Pigments	NAD and NADP	NAD and NADP cofactor biosynthesis global	Quinolinate synthetase (EC 2.5.1.72)	<a href=&#39;?page=Annotation&feature=fig|6666666.640627.peg.3513&#39; target=_blank>fig|6666666.640627.peg.3513</a>	yes	<a href=&#39;?page=Annotation&feature=fig|6666666.640629.peg.3989&#39; target=_blank>fig|6666666.640629.peg.3989</a>	yes
A and B	Cofactors, Vitamins, Prosthetic Groups, Pigments	NAD and NADP	NAD and NADP cofactor biosynthesis global	Transcriptional repressor for NAD biosynthesis in gram-positives	<a href=&#39;?page=Annotation&feature=fig|6666666.640627.peg.3517&#39; target=_blank>fig|6666666.640627.peg.3517</a>	yes	<a href=&#39;?page=Annotation&feature=fig|6666666.640629.peg.4358&#39; target=_blank>fig|6666666.640629.peg.4358</a>	yes
A and B	Cofactors, Vitamins, Prosthetic Groups, Pigments	NAD and NADP	NAD and NADP cofactor biosynthesis global	Tryptophan 2,3-dioxygenase (EC 1.13.11.11)	<a href=&#39;?page=Annotation&feature=fig|6666666.640627.peg.4051&#39; target=_blank>fig|6666666.640627.peg.4051</a>	yes	<a href=&#39;?page=Annotation&feature=fig|6666666.640629.peg.3844&#39; target=_blank>fig|6666666.640629.peg.3844</a>	yes
B	Cofactors, Vitamins, Prosthetic Groups, Pigments	NAD and NADP	NAD and NADP cofactor biosynthesis global	Predicted N-ribosylNicotinamide CRP-like regulator	<input type=&#39;button&#39; value=&#39;find&#39; onclick=&#39;window.open("?page=SearchGene&fr=Predicted N-ribosylNicotinamide CRP-like regulator&organism=6666666.640627&subsystem=NAD_and_NADP_cofactor_biosynthesis_global&template_gene=fig|6666666.640629.peg.487");&#39;>	no	<a href=&#39;?page=Annotation&feature=fig|6666666.640629.peg.487&#39; target=_blank>fig|6666666.640629.peg.487</a>	yes
A and B	Cofactors, Vitamins, Prosthetic Groups, Pigments	Pyridoxine	Pyridoxin(Vitamin B6) Degradation Pathway	Hypothetical NagD-like phosphatase	<a href=&#39;?page=Annotation&feature=fig|6666666.640627.peg.2354&#39; target=_blank>fig|6666666.640627.peg.2354</a>	yes	<a href=&#39;?page=Annotation&feature=fig|6666666.640629.peg.733&#39; target=_blank>fig|6666666.640629.peg.733</a>	yes
A and B	Cofactors, Vitamins, Prosthetic Groups, Pigments	Quinone cofactors	Menaquinone and Phylloquinone Biosynthesis	1,4-dihydroxy-2-naphthoate polyprenyltransferase (EC 2.5.1.74)	<a href=&#39;?page=Annotation&feature=fig|6666666.640627.peg.2322&#39; target=_blank>fig|6666666.640627.peg.2322</a>	yes	<a href=&#39;?page=Annotation&feature=fig|6666666.640629.peg.694&#39; target=_blank>fig|6666666.640629.peg.694</a>	yes
A and B	Cofactors, Vitamins, Prosthetic Groups, Pigments	Quinone cofactors	Menaquinone and Phylloquinone Biosynthesis	2-succinyl-5-enolpyruvyl-6-hydroxy-3-cyclohexene-1-carboxylic-acid synthase (EC 2.2.1.9)	<a href=&#39;?page=Annotation&feature=fig|6666666.640627.peg.2320&#39; target=_blank>fig|6666666.640627.peg.2320</a>	yes	<a href=&#39;?page=Annotation&feature=fig|6666666.640629.peg.692&#39; target=_blank>fig|6666666.640629.peg.692</a>	yes
A and B	Cofactors, Vitamins, Prosthetic Groups, Pigments	Quinone cofactors	Menaquinone and Phylloquinone Biosynthesis	2-succinyl-6-hydroxy-2,4-cyclohexadiene-1-carboxylate synthase (EC 4.2.99.20)	<a href=&#39;?page=Annotation&feature=fig|6666666.640627.peg.2319&#39; target=_blank>fig|6666666.640627.peg.2319</a>	yes	<a href=&#39;?page=Annotation&feature=fig|6666666.640629.peg.691&#39; target=_blank>fig|6666666.640629.peg.691</a>	yes
A and B	Cofactors, Vitamins, Prosthetic Groups, Pigments	Quinone cofactors	Menaquinone and Phylloquinone Biosynthesis	Menaquinone-specific isochorismate synthase (EC 5.4.4.2)	<a href=&#39;?page=Annotation&feature=fig|6666666.640627.peg.2321&#39; target=_blank>fig|6666666.640627.peg.2321</a>	yes	<a href=&#39;?page=Annotation&feature=fig|6666666.640629.peg.693&#39; target=_blank>fig|6666666.640629.peg.693</a>	yes
A and B	Cofactors, Vitamins, Prosthetic Groups, Pigments	Quinone cofactors	Menaquinone and Phylloquinone Biosynthesis	Naphthoate synthase (EC 4.1.3.36)	<a href=&#39;?page=Annotation&feature=fig|6666666.640627.peg.2318&#39; target=_blank>fig|6666666.640627.peg.2318</a>	yes	<a href=&#39;?page=Annotation&feature=fig|6666666.640629.peg.690&#39; target=_blank>fig|6666666.640629.peg.690</a>	yes
A and B	Cofactors, Vitamins, Prosthetic Groups, Pigments	Quinone cofactors	Menaquinone and Phylloquinone Biosynthesis	O-succinylbenzoate synthase (EC 4.2.1.113)	<a href=&#39;?page=Annotation&feature=fig|6666666.640627.peg.39&#39; target=_blank>fig|6666666.640627.peg.39</a>	yes	<a href=&#39;?page=Annotation&feature=fig|6666666.640629.peg.688&#39; target=_blank>fig|6666666.640629.peg.688</a>	yes
A and B	Cofactors, Vitamins, Prosthetic Groups, Pigments	Quinone cofactors	Menaquinone and Phylloquinone Biosynthesis	O-succinylbenzoic acid--CoA ligase (EC 6.2.1.26)	<a href=&#39;?page=Annotation&feature=fig|6666666.640627.peg.2317&#39; target=_blank>fig|6666666.640627.peg.2317</a>	yes	<a href=&#39;?page=Annotation&feature=fig|6666666.640629.peg.689&#39; target=_blank>fig|6666666.640629.peg.689</a>	yes
A and B	Cofactors, Vitamins, Prosthetic Groups, Pigments	Quinone cofactors	Menaquinone and Phylloquinone Biosynthesis -- gjo	1,4-dihydroxy-2-naphthoate polyprenyltransferase (EC 2.5.1.74)	<a href=&#39;?page=Annotation&feature=fig|6666666.640627.peg.2322&#39; target=_blank>fig|6666666.640627.peg.2322</a>	yes	<a href=&#39;?page=Annotation&feature=fig|6666666.640629.peg.694&#39; target=_blank>fig|6666666.640629.peg.694</a>	yes
A and B	Cofactors, Vitamins, Prosthetic Groups, Pigments	Quinone cofactors	Menaquinone and Phylloquinone Biosynthesis -- gjo	2-succinyl-5-enolpyruvyl-6-hydroxy-3-cyclohexene-1-carboxylic-acid synthase (EC 2.2.1.9)	<a href=&#39;?page=Annotation&feature=fig|6666666.640627.peg.2320&#39; target=_blank>fig|6666666.640627.peg.2320</a>	yes	<a href=&#39;?page=Annotation&feature=fig|6666666.640629.peg.692&#39; target=_blank>fig|6666666.640629.peg.692</a>	yes
A and B	Cofactors, Vitamins, Prosthetic Groups, Pigments	Quinone cofactors	Menaquinone and Phylloquinone Biosynthesis -- gjo	2-succinyl-6-hydroxy-2,4-cyclohexadiene-1-carboxylate synthase (EC 4.2.99.20)	<a href=&#39;?page=Annotation&feature=fig|6666666.640627.peg.2319&#39; target=_blank>fig|6666666.640627.peg.2319</a>	yes	<a href=&#39;?page=Annotation&feature=fig|6666666.640629.peg.691&#39; target=_blank>fig|6666666.640629.peg.691</a>	yes
A and B	Cofactors, Vitamins, Prosthetic Groups, Pigments	Quinone cofactors	Menaquinone and Phylloquinone Biosynthesis -- gjo	Menaquinone-specific isochorismate synthase (EC 5.4.4.2)	<a href=&#39;?page=Annotation&feature=fig|6666666.640627.peg.2321&#39; target=_blank>fig|6666666.640627.peg.2321</a>	yes	<a href=&#39;?page=Annotation&feature=fig|6666666.640629.peg.693&#39; target=_blank>fig|6666666.640629.peg.693</a>	yes
A and B	Cofactors, Vitamins, Prosthetic Groups, Pigments	Quinone cofactors	Menaquinone and Phylloquinone Biosynthesis -- gjo	Naphthoate synthase (EC 4.1.3.36)	<a href=&#39;?page=Annotation&feature=fig|6666666.640627.peg.2318&#39; target=_blank>fig|6666666.640627.peg.2318</a>	yes	<a href=&#39;?page=Annotation&feature=fig|6666666.640629.peg.690&#39; target=_blank>fig|6666666.640629.peg.690</a>	yes
A and B	Cofactors, Vitamins, Prosthetic Groups, Pigments	Quinone cofactors	Menaquinone and Phylloquinone Biosynthesis -- gjo	O-succinylbenzoate synthase (EC 4.2.1.113)	<a href=&#39;?page=Annotation&feature=fig|6666666.640627.peg.39&#39; target=_blank>fig|6666666.640627.peg.39</a>	yes	<a href=&#39;?page=Annotation&feature=fig|6666666.640629.peg.688&#39; target=_blank>fig|6666666.640629.peg.688</a>	yes
A and B	Cofactors, Vitamins, Prosthetic Groups, Pigments	Quinone cofactors	Menaquinone and Phylloquinone Biosynthesis -- gjo	O-succinylbenzoic acid--CoA ligase (EC 6.2.1.26)	<a href=&#39;?page=Annotation&feature=fig|6666666.640627.peg.2317&#39; target=_blank>fig|6666666.640627.peg.2317</a>	yes	<a href=&#39;?page=Annotation&feature=fig|6666666.640629.peg.689&#39; target=_blank>fig|6666666.640629.peg.689</a>	yes
A	Cofactors, Vitamins, Prosthetic Groups, Pigments	Quinone cofactors	Menaquinone and Phylloquinone Biosynthesis	Ubiquinone/menaquinone biosynthesis methyltransferase UbiE (EC 2.1.1.-)	<a href=&#39;?page=Annotation&feature=fig|6666666.640627.peg.3798&#39; target=_blank>fig|6666666.640627.peg.3798</a>	yes	<input type=&#39;button&#39; class=&#39;button&#39; value=&#39;find&#39; onclick=&#39;window.open("?page=SearchGene&fr=Ubiquinone/menaquinone biosynthesis methyltransferase UbiE (EC 2.1.1.-)&organism=6666666.640629&subsystem=Menaquinone_and_Phylloquinone_Biosynthesis&template_gene=fig|6666666.640627.peg.3798");&#39;>	no
A and B	Cofactors, Vitamins, Prosthetic Groups, Pigments	Riboflavin, FMN, FAD	Riboflavin, FMN and FAD metabolism	3,4-dihydroxy-2-butanone 4-phosphate synthase (EC 4.1.99.12)	<a href=&#39;?page=Annotation&feature=fig|6666666.640627.peg.3888&#39; target=_blank>fig|6666666.640627.peg.3888</a>	yes	<a href=&#39;?page=Annotation&feature=fig|6666666.640629.peg.4255&#39; target=_blank>fig|6666666.640629.peg.4255</a>	yes
A and B	Cofactors, Vitamins, Prosthetic Groups, Pigments	Riboflavin, FMN, FAD	Riboflavin, FMN and FAD metabolism	5-amino-6-(5-phosphoribosylamino)uracil reductase (EC 1.1.1.193)	<a href=&#39;?page=Annotation&feature=fig|6666666.640627.peg.919&#39; target=_blank>fig|6666666.640627.peg.919</a>	yes	<a href=&#39;?page=Annotation&feature=fig|6666666.640629.peg.4253&#39; target=_blank>fig|6666666.640629.peg.4253</a>	yes
A and B	Cofactors, Vitamins, Prosthetic Groups, Pigments	Riboflavin, FMN, FAD	Riboflavin, FMN and FAD metabolism	6,7-dimethyl-8-ribityllumazine synthase (EC 2.5.1.78)	<a href=&#39;?page=Annotation&feature=fig|6666666.640627.peg.3887&#39; target=_blank>fig|6666666.640627.peg.3887</a>	yes	<a href=&#39;?page=Annotation&feature=fig|6666666.640629.peg.4256&#39; target=_blank>fig|6666666.640629.peg.4256</a>	yes
A and B	Cofactors, Vitamins, Prosthetic Groups, Pigments	Riboflavin, FMN, FAD	Riboflavin, FMN and FAD metabolism	Diaminohydroxyphosphoribosylaminopyrimidine deaminase (EC 3.5.4.26)	<a href=&#39;?page=Annotation&feature=fig|6666666.640627.peg.919&#39; target=_blank>fig|6666666.640627.peg.919</a>	yes	<a href=&#39;?page=Annotation&feature=fig|6666666.640629.peg.4253&#39; target=_blank>fig|6666666.640629.peg.4253</a>	yes
A and B	Cofactors, Vitamins, Prosthetic Groups, Pigments	Riboflavin, FMN, FAD	Riboflavin, FMN and FAD metabolism	FMN adenylyltransferase (EC 2.7.7.2)	<a href=&#39;?page=Annotation&feature=fig|6666666.640627.peg.1659&#39; target=_blank>fig|6666666.640627.peg.1659</a>	yes	<a href=&#39;?page=Annotation&feature=fig|6666666.640629.peg.3951&#39; target=_blank>fig|6666666.640629.peg.3951</a>	yes
A and B	Cofactors, Vitamins, Prosthetic Groups, Pigments	Riboflavin, FMN, FAD	Riboflavin, FMN and FAD metabolism	GTP cyclohydrolase II (EC 3.5.4.25)	<a href=&#39;?page=Annotation&feature=fig|6666666.640627.peg.920&#39; target=_blank>fig|6666666.640627.peg.920</a>, <a href=&#39;?page=Annotation&feature=fig|6666666.640627.peg.3888&#39; target=_blank>fig|6666666.640627.peg.3888</a>	yes	<a href=&#39;?page=Annotation&feature=fig|6666666.640629.peg.4255&#39; target=_blank>fig|6666666.640629.peg.4255</a>	yes
A and B	Cofactors, Vitamins, Prosthetic Groups, Pigments	Riboflavin, FMN, FAD	Riboflavin, FMN and FAD metabolism	Riboflavin kinase (EC 2.7.1.26)	<a href=&#39;?page=Annotation&feature=fig|6666666.640627.peg.1659&#39; target=_blank>fig|6666666.640627.peg.1659</a>	yes	<a href=&#39;?page=Annotation&feature=fig|6666666.640629.peg.3951&#39; target=_blank>fig|6666666.640629.peg.3951</a>	yes
A and B	Cofactors, Vitamins, Prosthetic Groups, Pigments	Riboflavin, FMN, FAD	Riboflavin, FMN and FAD metabolism	Riboflavin synthase eubacterial/eukaryotic (EC 2.5.1.9)	<a href=&#39;?page=Annotation&feature=fig|6666666.640627.peg.3889&#39; target=_blank>fig|6666666.640627.peg.3889</a>	yes	<a href=&#39;?page=Annotation&feature=fig|6666666.640629.peg.4254&#39; target=_blank>fig|6666666.640629.peg.4254</a>	yes
A and B	Cofactors, Vitamins, Prosthetic Groups, Pigments	Riboflavin, FMN, FAD	riboflavin to FAD	3,4-dihydroxy-2-butanone 4-phosphate synthase (EC 4.1.99.12)	<a href=&#39;?page=Annotation&feature=fig|6666666.640627.peg.3888&#39; target=_blank>fig|6666666.640627.peg.3888</a>	yes	<a href=&#39;?page=Annotation&feature=fig|6666666.640629.peg.4255&#39; target=_blank>fig|6666666.640629.peg.4255</a>	yes
A and B	Cofactors, Vitamins, Prosthetic Groups, Pigments	Riboflavin, FMN, FAD	riboflavin to FAD	FMN adenylyltransferase (EC 2.7.7.2)	<a href=&#39;?page=Annotation&feature=fig|6666666.640627.peg.1659&#39; target=_blank>fig|6666666.640627.peg.1659</a>	yes	<a href=&#39;?page=Annotation&feature=fig|6666666.640629.peg.3951&#39; target=_blank>fig|6666666.640629.peg.3951</a>	yes
A and B	Cofactors, Vitamins, Prosthetic Groups, Pigments	Riboflavin, FMN, FAD	riboflavin to FAD	Riboflavin kinase (EC 2.7.1.26)	<a href=&#39;?page=Annotation&feature=fig|6666666.640627.peg.1659&#39; target=_blank>fig|6666666.640627.peg.1659</a>	yes	<a href=&#39;?page=Annotation&feature=fig|6666666.640629.peg.3951&#39; target=_blank>fig|6666666.640629.peg.3951</a>	yes
A and B	Cofactors, Vitamins, Prosthetic Groups, Pigments	Riboflavin, FMN, FAD	riboflavin to FAD	Riboflavin synthase eubacterial/eukaryotic (EC 2.5.1.9)	<a href=&#39;?page=Annotation&feature=fig|6666666.640627.peg.3889&#39; target=_blank>fig|6666666.640627.peg.3889</a>	yes	<a href=&#39;?page=Annotation&feature=fig|6666666.640629.peg.4254&#39; target=_blank>fig|6666666.640629.peg.4254</a>	yes
A	Cofactors, Vitamins, Prosthetic Groups, Pigments	Riboflavin, FMN, FAD	Flavodoxin	Flavodoxin	<a href=&#39;?page=Annotation&feature=fig|6666666.640627.peg.4273&#39; target=_blank>fig|6666666.640627.peg.4273</a>	yes	<input type=&#39;button&#39; class=&#39;button&#39; value=&#39;find&#39; onclick=&#39;window.open("?page=SearchGene&fr=Flavodoxin&organism=6666666.640629&subsystem=Flavodoxin&template_gene=fig|6666666.640627.peg.4273");&#39;>	no
A and B	DNA Metabolism	DNA repair	DNA repair, UvrABC system	Excinuclease ABC subunit A	<a href=&#39;?page=Annotation&feature=fig|6666666.640627.peg.2501&#39; target=_blank>fig|6666666.640627.peg.2501</a>	yes	<a href=&#39;?page=Annotation&feature=fig|6666666.640629.peg.897&#39; target=_blank>fig|6666666.640629.peg.897</a>	yes
A and B	DNA Metabolism	DNA repair	DNA repair, UvrABC system	Excinuclease ABC subunit B	<a href=&#39;?page=Annotation&feature=fig|6666666.640627.peg.2502&#39; target=_blank>fig|6666666.640627.peg.2502</a>	yes	<a href=&#39;?page=Annotation&feature=fig|6666666.640629.peg.898&#39; target=_blank>fig|6666666.640629.peg.898</a>, <a href=&#39;?page=Annotation&feature=fig|6666666.640629.peg.899&#39; target=_blank>fig|6666666.640629.peg.899</a>	yes
A and B	DNA Metabolism	DNA repair	DNA repair, UvrABC system	Excinuclease ABC subunit C	<a href=&#39;?page=Annotation&feature=fig|6666666.640627.peg.2175&#39; target=_blank>fig|6666666.640627.peg.2175</a>	yes	<a href=&#39;?page=Annotation&feature=fig|6666666.640629.peg.129&#39; target=_blank>fig|6666666.640629.peg.129</a>	yes
A and B	DNA Metabolism	DNA repair	DNA repair, bacterial	A/G-specific adenine glycosylase (EC 3.2.2.-)	<a href=&#39;?page=Annotation&feature=fig|6666666.640627.peg.1147&#39; target=_blank>fig|6666666.640627.peg.1147</a>	yes	<a href=&#39;?page=Annotation&feature=fig|6666666.640629.peg.3364&#39; target=_blank>fig|6666666.640629.peg.3364</a>	yes
A and B	DNA Metabolism	DNA repair	DNA repair, bacterial	DNA polymerase IV (EC 2.7.7.7)	<a href=&#39;?page=Annotation&feature=fig|6666666.640627.peg.1833&#39; target=_blank>fig|6666666.640627.peg.1833</a>	yes	<a href=&#39;?page=Annotation&feature=fig|6666666.640629.peg.405&#39; target=_blank>fig|6666666.640629.peg.405</a>	yes
A and B	DNA Metabolism	DNA repair	DNA repair, bacterial	DNA repair protein RadA	<a href=&#39;?page=Annotation&feature=fig|6666666.640627.peg.807&#39; target=_blank>fig|6666666.640627.peg.807</a>	yes	<a href=&#39;?page=Annotation&feature=fig|6666666.640629.peg.4169&#39; target=_blank>fig|6666666.640629.peg.4169</a>	yes
A and B	DNA Metabolism	DNA repair	DNA repair, bacterial	DNA repair protein RecN	<a href=&#39;?page=Annotation&feature=fig|6666666.640627.peg.1852&#39; target=_blank>fig|6666666.640627.peg.1852</a>	yes	<a href=&#39;?page=Annotation&feature=fig|6666666.640629.peg.381&#39; target=_blank>fig|6666666.640629.peg.381</a>	yes
A and B	DNA Metabolism	DNA repair	DNA repair, bacterial	Endonuclease IV (EC 3.1.21.2)	<a href=&#39;?page=Annotation&feature=fig|6666666.640627.peg.1926&#39; target=_blank>fig|6666666.640627.peg.1926</a>	yes	<a href=&#39;?page=Annotation&feature=fig|6666666.640629.peg.301&#39; target=_blank>fig|6666666.640629.peg.301</a>	yes
A and B	DNA Metabolism	DNA repair	DNA repair, bacterial	Exodeoxyribonuclease VII large subunit (EC 3.1.11.6)	<a href=&#39;?page=Annotation&feature=fig|6666666.640627.peg.1858&#39; target=_blank>fig|6666666.640627.peg.1858</a>	yes	<a href=&#39;?page=Annotation&feature=fig|6666666.640629.peg.374&#39; target=_blank>fig|6666666.640629.peg.374</a>	yes
A and B	DNA Metabolism	DNA repair	DNA repair, bacterial	Exodeoxyribonuclease VII small subunit (EC 3.1.11.6)	<a href=&#39;?page=Annotation&feature=fig|6666666.640627.peg.1857&#39; target=_blank>fig|6666666.640627.peg.1857</a>	yes	<a href=&#39;?page=Annotation&feature=fig|6666666.640629.peg.375&#39; target=_blank>fig|6666666.640629.peg.375</a>	yes
A and B	DNA Metabolism	DNA repair	DNA repair, bacterial	Exonuclease SbcC	<a href=&#39;?page=Annotation&feature=fig|6666666.640627.peg.3440&#39; target=_blank>fig|6666666.640627.peg.3440</a>	yes	<a href=&#39;?page=Annotation&feature=fig|6666666.640629.peg.2438&#39; target=_blank>fig|6666666.640629.peg.2438</a>	yes
A and B	DNA Metabolism	DNA repair	DNA repair, bacterial	Exonuclease SbcD	<a href=&#39;?page=Annotation&feature=fig|6666666.640627.peg.3441&#39; target=_blank>fig|6666666.640627.peg.3441</a>	yes	<a href=&#39;?page=Annotation&feature=fig|6666666.640629.peg.2439&#39; target=_blank>fig|6666666.640629.peg.2439</a>	yes
A and B	DNA Metabolism	DNA repair	DNA repair, bacterial	Methylated-DNA--protein-cysteine methyltransferase (EC 2.1.1.63)	<a href=&#39;?page=Annotation&feature=fig|6666666.640627.peg.3329&#39; target=_blank>fig|6666666.640627.peg.3329</a>, <a href=&#39;?page=Annotation&feature=fig|6666666.640627.peg.3331&#39; target=_blank>fig|6666666.640627.peg.3331</a>, <a href=&#39;?page=Annotation&feature=fig|6666666.640627.peg.4013&#39; target=_blank>fig|6666666.640627.peg.4013</a>	yes	<a href=&#39;?page=Annotation&feature=fig|6666666.640629.peg.1276&#39; target=_blank>fig|6666666.640629.peg.1276</a>	yes
A and B	DNA Metabolism	DNA repair	DNA repair, bacterial	RecA protein	<a href=&#39;?page=Annotation&feature=fig|6666666.640627.peg.1688&#39; target=_blank>fig|6666666.640627.peg.1688</a>	yes	<a href=&#39;?page=Annotation&feature=fig|6666666.640629.peg.3496&#39; target=_blank>fig|6666666.640629.peg.3496</a>	yes
A and B	DNA Metabolism	DNA repair	DNA repair, bacterial	SOS-response repressor and protease LexA (EC 3.4.21.88)	<a href=&#39;?page=Annotation&feature=fig|6666666.640627.peg.4375&#39; target=_blank>fig|6666666.640627.peg.4375</a>	yes	<a href=&#39;?page=Annotation&feature=fig|6666666.640629.peg.3516&#39; target=_blank>fig|6666666.640629.peg.3516</a>	yes
A and B	DNA Metabolism	DNA repair	DNA repair, bacterial	Single-stranded DNA-binding protein	<a href=&#39;?page=Annotation&feature=fig|6666666.640627.peg.2700&#39; target=_blank>fig|6666666.640627.peg.2700</a>	yes	<a href=&#39;?page=Annotation&feature=fig|6666666.640629.peg.2891&#39; target=_blank>fig|6666666.640629.peg.2891</a>	yes
A and B	DNA Metabolism	DNA repair	DNA repair, bacterial DinG and relatives	DinG family ATP-dependent helicase YoaA	<a href=&#39;?page=Annotation&feature=fig|6666666.640627.peg.1723&#39; target=_blank>fig|6666666.640627.peg.1723</a>	yes	<a href=&#39;?page=Annotation&feature=fig|6666666.640629.peg.2476&#39; target=_blank>fig|6666666.640629.peg.2476</a>	yes
A and B	DNA Metabolism	DNA repair	DNA repair, bacterial MutL-MutS system	DNA mismatch repair protein MutL	<a href=&#39;?page=Annotation&feature=fig|6666666.640627.peg.1697&#39; target=_blank>fig|6666666.640627.peg.1697</a>	yes	<a href=&#39;?page=Annotation&feature=fig|6666666.640629.peg.3506&#39; target=_blank>fig|6666666.640629.peg.3506</a>	yes
A and B	DNA Metabolism	DNA repair	DNA repair, bacterial MutL-MutS system	DNA mismatch repair protein MutS	<a href=&#39;?page=Annotation&feature=fig|6666666.640627.peg.1696&#39; target=_blank>fig|6666666.640627.peg.1696</a>	yes	<a href=&#39;?page=Annotation&feature=fig|6666666.640629.peg.3505&#39; target=_blank>fig|6666666.640629.peg.3505</a>	yes
A and B	DNA Metabolism	DNA repair	DNA repair, bacterial MutL-MutS system	Recombination inhibitory protein MutS2	<a href=&#39;?page=Annotation&feature=fig|6666666.640627.peg.2184&#39; target=_blank>fig|6666666.640627.peg.2184</a>	yes	<a href=&#39;?page=Annotation&feature=fig|6666666.640629.peg.121&#39; target=_blank>fig|6666666.640629.peg.121</a>	yes
A and B	DNA Metabolism	DNA repair	DNA repair, bacterial RecBCD pathway	RecD-like DNA helicase YrrC	<a href=&#39;?page=Annotation&feature=fig|6666666.640627.peg.2011&#39; target=_blank>fig|6666666.640627.peg.2011</a>	yes	<a href=&#39;?page=Annotation&feature=fig|6666666.640629.peg.223&#39; target=_blank>fig|6666666.640629.peg.223</a>	yes
A and B	DNA Metabolism	DNA repair	DNA repair, bacterial RecFOR pathway	ATP-dependent DNA helicase RecQ	<a href=&#39;?page=Annotation&feature=fig|6666666.640627.peg.1780&#39; target=_blank>fig|6666666.640627.peg.1780</a>, <a href=&#39;?page=Annotation&feature=fig|6666666.640627.peg.3679&#39; target=_blank>fig|6666666.640627.peg.3679</a>	yes	<a href=&#39;?page=Annotation&feature=fig|6666666.640629.peg.2541&#39; target=_blank>fig|6666666.640629.peg.2541</a>, <a href=&#39;?page=Annotation&feature=fig|6666666.640629.peg.4340&#39; target=_blank>fig|6666666.640629.peg.4340</a>	yes
A and B	DNA Metabolism	DNA repair	DNA repair, bacterial RecFOR pathway	DNA recombination and repair protein RecF	<a href=&#39;?page=Annotation&feature=fig|6666666.640627.peg.709&#39; target=_blank>fig|6666666.640627.peg.709</a>	yes	<a href=&#39;?page=Annotation&feature=fig|6666666.640629.peg.2929&#39; target=_blank>fig|6666666.640629.peg.2929</a>	yes
A and B	DNA Metabolism	DNA repair	DNA repair, bacterial RecFOR pathway	DNA recombination and repair protein RecO	<a href=&#39;?page=Annotation&feature=fig|6666666.640627.peg.1940&#39; target=_blank>fig|6666666.640627.peg.1940</a>	yes	<a href=&#39;?page=Annotation&feature=fig|6666666.640629.peg.286&#39; target=_blank>fig|6666666.640629.peg.286</a>	yes
A and B	DNA Metabolism	DNA repair	DNA repair, bacterial RecFOR pathway	RecA protein	<a href=&#39;?page=Annotation&feature=fig|6666666.640627.peg.1688&#39; target=_blank>fig|6666666.640627.peg.1688</a>	yes	<a href=&#39;?page=Annotation&feature=fig|6666666.640629.peg.3496&#39; target=_blank>fig|6666666.640629.peg.3496</a>	yes
A and B	DNA Metabolism	DNA repair	DNA repair, bacterial RecFOR pathway	RecU Holliday junction resolvase	<a href=&#39;?page=Annotation&feature=fig|6666666.640627.peg.1715&#39; target=_blank>fig|6666666.640627.peg.1715</a>	yes	<a href=&#39;?page=Annotation&feature=fig|6666666.640629.peg.2468&#39; target=_blank>fig|6666666.640629.peg.2468</a>	yes
A and B	DNA Metabolism	DNA repair	DNA repair, bacterial RecFOR pathway	Recombination protein RecR	<a href=&#39;?page=Annotation&feature=fig|6666666.640627.peg.735&#39; target=_blank>fig|6666666.640627.peg.735</a>	yes	<a href=&#39;?page=Annotation&feature=fig|6666666.640629.peg.2981&#39; target=_blank>fig|6666666.640629.peg.2981</a>	yes
A and B	DNA Metabolism	DNA repair	DNA repair, bacterial RecFOR pathway	Single-stranded DNA-binding protein	<a href=&#39;?page=Annotation&feature=fig|6666666.640627.peg.2700&#39; target=_blank>fig|6666666.640627.peg.2700</a>	yes	<a href=&#39;?page=Annotation&feature=fig|6666666.640629.peg.2891&#39; target=_blank>fig|6666666.640629.peg.2891</a>	yes
A and B	DNA Metabolism	DNA repair	DNA repair system including RecA, MutS and a hypothetical protein	DNA mismatch repair protein MutS	<a href=&#39;?page=Annotation&feature=fig|6666666.640627.peg.1696&#39; target=_blank>fig|6666666.640627.peg.1696</a>	yes	<a href=&#39;?page=Annotation&feature=fig|6666666.640629.peg.3505&#39; target=_blank>fig|6666666.640629.peg.3505</a>	yes
A and B	DNA Metabolism	DNA repair	DNA repair system including RecA, MutS and a hypothetical protein	RecA protein	<a href=&#39;?page=Annotation&feature=fig|6666666.640627.peg.1688&#39; target=_blank>fig|6666666.640627.peg.1688</a>	yes	<a href=&#39;?page=Annotation&feature=fig|6666666.640629.peg.3496&#39; target=_blank>fig|6666666.640629.peg.3496</a>	yes
A and B	DNA Metabolism	DNA repair	Nonhomologous End-Joining in Bacteria	ATP-dependent DNA ligase (EC 6.5.1.1) clustered with Ku protein, LigD	<a href=&#39;?page=Annotation&feature=fig|6666666.640627.peg.2691&#39; target=_blank>fig|6666666.640627.peg.2691</a>	yes	<a href=&#39;?page=Annotation&feature=fig|6666666.640629.peg.4307&#39; target=_blank>fig|6666666.640629.peg.4307</a>	yes
A and B	DNA Metabolism	DNA repair	Nonhomologous End-Joining in Bacteria	Ku domain protein	<a href=&#39;?page=Annotation&feature=fig|6666666.640627.peg.2690&#39; target=_blank>fig|6666666.640627.peg.2690</a>	yes	<a href=&#39;?page=Annotation&feature=fig|6666666.640629.peg.4308&#39; target=_blank>fig|6666666.640629.peg.4308</a>	yes
A	DNA Metabolism	DNA repair	DNA repair, bacterial	ADA regulatory protein	<a href=&#39;?page=Annotation&feature=fig|6666666.640627.peg.392&#39; target=_blank>fig|6666666.640627.peg.392</a>, <a href=&#39;?page=Annotation&feature=fig|6666666.640627.peg.3331&#39; target=_blank>fig|6666666.640627.peg.3331</a>, <a href=&#39;?page=Annotation&feature=fig|6666666.640627.peg.4026&#39; target=_blank>fig|6666666.640627.peg.4026</a>	yes	<input type=&#39;button&#39; class=&#39;button&#39; value=&#39;find&#39; onclick=&#39;window.open("?page=SearchGene&fr=ADA regulatory protein&organism=6666666.640629&subsystem=DNA_repair,_bacterial&template_gene=fig|6666666.640627.peg.392");&#39;>	no
A	DNA Metabolism	DNA repair	DNA repair, bacterial	Exodeoxyribonuclease III (EC 3.1.11.2)	<a href=&#39;?page=Annotation&feature=fig|6666666.640627.peg.339&#39; target=_blank>fig|6666666.640627.peg.339</a>, <a href=&#39;?page=Annotation&feature=fig|6666666.640627.peg.4073&#39; target=_blank>fig|6666666.640627.peg.4073</a>	yes	<input type=&#39;button&#39; class=&#39;button&#39; value=&#39;find&#39; onclick=&#39;window.open("?page=SearchGene&fr=Exodeoxyribonuclease III (EC 3.1.11.2)&organism=6666666.640629&subsystem=DNA_repair,_bacterial&template_gene=fig|6666666.640627.peg.339");&#39;>	no
B	DNA Metabolism	DNA repair	DNA repair, bacterial DinG and relatives	DinG family ATP-dependent helicase CPE1197	<input type=&#39;button&#39; value=&#39;find&#39; onclick=&#39;window.open("?page=SearchGene&fr=DinG family ATP-dependent helicase CPE1197&organism=6666666.640627&subsystem=DNA_repair,_bacterial_DinG_and_relatives&template_gene=fig|6666666.640629.peg.3857");&#39;>	no	<a href=&#39;?page=Annotation&feature=fig|6666666.640629.peg.3857&#39; target=_blank>fig|6666666.640629.peg.3857</a>	yes
B	DNA Metabolism	DNA repair	DNA repair system including RecA, MutS and a hypothetical protein	Regulatory protein RecX	<input type=&#39;button&#39; value=&#39;find&#39; onclick=&#39;window.open("?page=SearchGene&fr=Regulatory protein RecX&organism=6666666.640627&subsystem=DNA_repair_system_including_RecA,_MutS_and_a_hypothetical_protein&template_gene=fig|6666666.640629.peg.3353");&#39;>	no	<a href=&#39;?page=Annotation&feature=fig|6666666.640629.peg.3353&#39; target=_blank>fig|6666666.640629.peg.3353</a>	yes
A and B	DNA Metabolism	DNA replication	DNA replication strays	DNA polymerase III polC-type (EC 2.7.7.7)	<a href=&#39;?page=Annotation&feature=fig|6666666.640627.peg.1650&#39; target=_blank>fig|6666666.640627.peg.1650</a>	yes	<a href=&#39;?page=Annotation&feature=fig|6666666.640629.peg.3461&#39; target=_blank>fig|6666666.640629.peg.3461</a>	yes
A and B	DNA Metabolism	DNA replication	DNA topoisomerases, Type I, ATP-independent	DNA topoisomerase I (EC 5.99.1.2)	<a href=&#39;?page=Annotation&feature=fig|6666666.640627.peg.1601&#39; target=_blank>fig|6666666.640627.peg.1601</a>	yes	<a href=&#39;?page=Annotation&feature=fig|6666666.640629.peg.3409&#39; target=_blank>fig|6666666.640629.peg.3409</a>	yes
A and B	DNA Metabolism	DNA replication	DNA topoisomerases, Type I, ATP-independent	DNA topoisomerase III (EC 5.99.1.2)	<a href=&#39;?page=Annotation&feature=fig|6666666.640627.peg.1042&#39; target=_blank>fig|6666666.640627.peg.1042</a>	yes	<a href=&#39;?page=Annotation&feature=fig|6666666.640629.peg.1909&#39; target=_blank>fig|6666666.640629.peg.1909</a>	yes
A and B	DNA Metabolism	DNA replication	DNA topoisomerases, Type II, ATP-dependent	DNA gyrase subunit A (EC 5.99.1.3)	<a href=&#39;?page=Annotation&feature=fig|6666666.640627.peg.712&#39; target=_blank>fig|6666666.640627.peg.712</a>	yes	<a href=&#39;?page=Annotation&feature=fig|6666666.640629.peg.2932&#39; target=_blank>fig|6666666.640629.peg.2932</a>	yes
A and B	DNA Metabolism	DNA replication	DNA topoisomerases, Type II, ATP-dependent	DNA gyrase subunit B (EC 5.99.1.3)	<a href=&#39;?page=Annotation&feature=fig|6666666.640627.peg.711&#39; target=_blank>fig|6666666.640627.peg.711</a>	yes	<a href=&#39;?page=Annotation&feature=fig|6666666.640629.peg.2931&#39; target=_blank>fig|6666666.640629.peg.2931</a>	yes
A	DNA Metabolism	DNA replication	DNA replication strays	DNA polymerase I 5&#39;-3&#39; exonuclease domain	<a href=&#39;?page=Annotation&feature=fig|6666666.640627.peg.4412&#39; target=_blank>fig|6666666.640627.peg.4412</a>	yes	<input type=&#39;button&#39; class=&#39;button&#39; value=&#39;find&#39; onclick=&#39;window.open("?page=SearchGene&fr=DNA polymerase I 5%27-3%27 exonuclease domain&organism=6666666.640629&subsystem=DNA_replication_strays&template_gene=fig|6666666.640627.peg.4412");&#39;>	no
A and B	DNA Metabolism	DNA uptake, competence	DNA processing cluster	DNA polymerase III subunits gamma and tau (EC 2.7.7.7)	<a href=&#39;?page=Annotation&feature=fig|6666666.640627.peg.732&#39; target=_blank>fig|6666666.640627.peg.732</a>, <a href=&#39;?page=Annotation&feature=fig|6666666.640627.peg.733&#39; target=_blank>fig|6666666.640627.peg.733</a>	yes	<a href=&#39;?page=Annotation&feature=fig|6666666.640629.peg.2979&#39; target=_blank>fig|6666666.640629.peg.2979</a>	yes
A and B	DNA Metabolism	DNA uptake, competence	DNA processing cluster	DNA topoisomerase III (EC 5.99.1.2)	<a href=&#39;?page=Annotation&feature=fig|6666666.640627.peg.1042&#39; target=_blank>fig|6666666.640627.peg.1042</a>	yes	<a href=&#39;?page=Annotation&feature=fig|6666666.640629.peg.1909&#39; target=_blank>fig|6666666.640629.peg.1909</a>	yes
A and B	DNA Metabolism	DNA uptake, competence	DNA processing cluster	Inhibitor of pro-sigmaK processing BofA	<a href=&#39;?page=Annotation&feature=fig|6666666.640627.peg.743&#39; target=_blank>fig|6666666.640627.peg.743</a>	yes	<a href=&#39;?page=Annotation&feature=fig|6666666.640629.peg.2983&#39; target=_blank>fig|6666666.640629.peg.2983</a>	yes
A and B	DNA Metabolism	DNA uptake, competence	DNA processing cluster	Recombination protein RecR	<a href=&#39;?page=Annotation&feature=fig|6666666.640627.peg.735&#39; target=_blank>fig|6666666.640627.peg.735</a>	yes	<a href=&#39;?page=Annotation&feature=fig|6666666.640629.peg.2981&#39; target=_blank>fig|6666666.640629.peg.2981</a>	yes
A	DNA Metabolism	DNA uptake, competence	DNA processing cluster	FIG015094: hypothetical protein	<a href=&#39;?page=Annotation&feature=fig|6666666.640627.peg.736&#39; target=_blank>fig|6666666.640627.peg.736</a>	yes	<input type=&#39;button&#39; class=&#39;button&#39; value=&#39;find&#39; onclick=&#39;window.open("?page=SearchGene&fr=FIG015094: hypothetical protein&organism=6666666.640629&subsystem=DNA_processing_cluster&template_gene=fig|6666666.640627.peg.736");&#39;>	no
A and B	DNA Metabolism	no subcategory	DNA ligases	ATP-dependent DNA ligase (EC 6.5.1.1) clustered with Ku protein, LigD	<a href=&#39;?page=Annotation&feature=fig|6666666.640627.peg.2691&#39; target=_blank>fig|6666666.640627.peg.2691</a>	yes	<a href=&#39;?page=Annotation&feature=fig|6666666.640629.peg.4307&#39; target=_blank>fig|6666666.640629.peg.4307</a>	yes
A and B	DNA Metabolism	no subcategory	DNA ligases	Ku domain protein	<a href=&#39;?page=Annotation&feature=fig|6666666.640627.peg.2690&#39; target=_blank>fig|6666666.640627.peg.2690</a>	yes	<a href=&#39;?page=Annotation&feature=fig|6666666.640629.peg.4308&#39; target=_blank>fig|6666666.640629.peg.4308</a>	yes
A and B	DNA Metabolism	no subcategory	DNA structural proteins, bacterial	Chromosome partition protein smc	<a href=&#39;?page=Annotation&feature=fig|6666666.640627.peg.1583&#39; target=_blank>fig|6666666.640627.peg.1583</a>	yes	<a href=&#39;?page=Annotation&feature=fig|6666666.640629.peg.3390&#39; target=_blank>fig|6666666.640629.peg.3390</a>	yes
A and B	DNA Metabolism	no subcategory	DNA structural proteins, bacterial	DNA-binding protein HBsu	<a href=&#39;?page=Annotation&feature=fig|6666666.640627.peg.1753&#39; target=_blank>fig|6666666.640627.peg.1753</a>	yes	<a href=&#39;?page=Annotation&feature=fig|6666666.640629.peg.2510&#39; target=_blank>fig|6666666.640629.peg.2510</a>	yes
A	DNA Metabolism	no subcategory	Restriction-Modification System	Type I restriction-modification system, DNA-methyltransferase subunit M (EC 2.1.1.72)	<a href=&#39;?page=Annotation&feature=fig|6666666.640627.peg.354&#39; target=_blank>fig|6666666.640627.peg.354</a>, <a href=&#39;?page=Annotation&feature=fig|6666666.640627.peg.409&#39; target=_blank>fig|6666666.640627.peg.409</a>, <a href=&#39;?page=Annotation&feature=fig|6666666.640627.peg.3714&#39; target=_blank>fig|6666666.640627.peg.3714</a>	yes	<input type=&#39;button&#39; class=&#39;button&#39; value=&#39;find&#39; onclick=&#39;window.open("?page=SearchGene&fr=Type I restriction-modification system, DNA-methyltransferase subunit M (EC 2.1.1.72)&organism=6666666.640629&subsystem=Restriction-Modification_System&template_gene=fig|6666666.640627.peg.354");&#39;>	no
A	DNA Metabolism	no subcategory	Restriction-Modification System	Type I restriction-modification system, restriction subunit R (EC 3.1.21.3)	<a href=&#39;?page=Annotation&feature=fig|6666666.640627.peg.356&#39; target=_blank>fig|6666666.640627.peg.356</a>, <a href=&#39;?page=Annotation&feature=fig|6666666.640627.peg.408&#39; target=_blank>fig|6666666.640627.peg.408</a>, <a href=&#39;?page=Annotation&feature=fig|6666666.640627.peg.3712&#39; target=_blank>fig|6666666.640627.peg.3712</a>	yes	<input type=&#39;button&#39; class=&#39;button&#39; value=&#39;find&#39; onclick=&#39;window.open("?page=SearchGene&fr=Type I restriction-modification system, restriction subunit R (EC 3.1.21.3)&organism=6666666.640629&subsystem=Restriction-Modification_System&template_gene=fig|6666666.640627.peg.356");&#39;>	no
A	DNA Metabolism	no subcategory	YcfH	Putative deoxyribonuclease similar to YcfH, type 3	<a href=&#39;?page=Annotation&feature=fig|6666666.640627.peg.2446&#39; target=_blank>fig|6666666.640627.peg.2446</a>	yes	<input type=&#39;button&#39; class=&#39;button&#39; value=&#39;find&#39; onclick=&#39;window.open("?page=SearchGene&fr=Putative deoxyribonuclease similar to YcfH, type 3&organism=6666666.640629&subsystem=YcfH&template_gene=fig|6666666.640627.peg.2446");&#39;>	no
B	DNA Metabolism	no subcategory	Restriction-Modification System	Type III restriction-modification system methylation subunit (EC 2.1.1.72)	<input type=&#39;button&#39; value=&#39;find&#39; onclick=&#39;window.open("?page=SearchGene&fr=Type III restriction-modification system methylation subunit (EC 2.1.1.72)&organism=6666666.640627&subsystem=Restriction-Modification_System&template_gene=fig|6666666.640629.peg.4059");&#39;>	no	<a href=&#39;?page=Annotation&feature=fig|6666666.640629.peg.4059&#39; target=_blank>fig|6666666.640629.peg.4059</a>	yes
A and B	Dormancy and Sporulation	no subcategory	SpoVS protein family	Stage III sporulation protein AE	<a href=&#39;?page=Annotation&feature=fig|6666666.640627.peg.1867&#39; target=_blank>fig|6666666.640627.peg.1867</a>	yes	<a href=&#39;?page=Annotation&feature=fig|6666666.640629.peg.365&#39; target=_blank>fig|6666666.640629.peg.365</a>	yes
[truncated: 704 more rows]

## Sheet: Feuil1
orgn A	Bacillus megaterrium
[truncated: 1 more rows]
