# Supplementary material for: Shedding light on the bacterial resistance to toxic UV filters: a comparative genomic study
Source: PeerJ. 2021 Nov 1;9:e12278. doi: 10.7717/peerj.12278 (PMC8567853; doi:10.7717/peerj.12278)
Supplement: Supplemental Information 3 [file peerj-09-12278-s003.xlsx]

## Sheet: Feuil2
Supplementary material
Title	Shedding light on the bacterial resistance to toxic UV filters: a comparative genomic study
Authors	Clément Lozano; Philippe Lebaron; Sabine Matallana-Surget

## Sheet: Glucanolyticus vs dabanensis ta
Presence	Category	Subcategory	Subsystem	Role	Organism A	SS active A	Organism B	SS active B
A and B	Amino Acids and Derivatives	Alanine, serine, and glycine	Alanine biosynthesis	Alanine racemase (EC 5.1.1.1)	<a href=&#39;?page=Annotation&feature=fig|59843.19.peg.855&#39; target=_blank>fig|59843.19.peg.855</a>	yes	<a href=&#39;?page=Annotation&feature=fig|6666666.640629.peg.2834&#39; target=_blank>fig|6666666.640629.peg.2834</a>, <a href=&#39;?page=Annotation&feature=fig|6666666.640629.peg.3692&#39; target=_blank>fig|6666666.640629.peg.3692</a>	yes
A and B	Amino Acids and Derivatives	Alanine, serine, and glycine	Alanine biosynthesis	Branched-chain amino acid aminotransferase (EC 2.6.1.42)	<a href=&#39;?page=Annotation&feature=fig|59843.19.peg.1766&#39; target=_blank>fig|59843.19.peg.1766</a>, <a href=&#39;?page=Annotation&feature=fig|59843.19.peg.3460&#39; target=_blank>fig|59843.19.peg.3460</a>	yes	<a href=&#39;?page=Annotation&feature=fig|6666666.640629.peg.1533&#39; target=_blank>fig|6666666.640629.peg.1533</a>, <a href=&#39;?page=Annotation&feature=fig|6666666.640629.peg.2775&#39; target=_blank>fig|6666666.640629.peg.2775</a>	yes
A and B	Amino Acids and Derivatives	Alanine, serine, and glycine	Alanine biosynthesis	Cysteine desulfurase (EC 2.8.1.7)	<a href=&#39;?page=Annotation&feature=fig|59843.19.peg.1966&#39; target=_blank>fig|59843.19.peg.1966</a>, <a href=&#39;?page=Annotation&feature=fig|59843.19.peg.3501&#39; target=_blank>fig|59843.19.peg.3501</a>	yes	<a href=&#39;?page=Annotation&feature=fig|6666666.640629.peg.220&#39; target=_blank>fig|6666666.640629.peg.220</a>, <a href=&#39;?page=Annotation&feature=fig|6666666.640629.peg.3992&#39; target=_blank>fig|6666666.640629.peg.3992</a>	yes
A and B	Amino Acids and Derivatives	Alanine, serine, and glycine	Alanine biosynthesis	Iron-sulfur cluster regulator IscR	<a href=&#39;?page=Annotation&feature=fig|59843.19.peg.3496&#39; target=_blank>fig|59843.19.peg.3496</a>	yes	<a href=&#39;?page=Annotation&feature=fig|6666666.640629.peg.219&#39; target=_blank>fig|6666666.640629.peg.219</a>	yes
A and B	Amino Acids and Derivatives	Alanine, serine, and glycine	Glycine Biosynthesis	2-amino-3-ketobutyrate coenzyme A ligase (EC 2.3.1.29)	<a href=&#39;?page=Annotation&feature=fig|59843.19.peg.320&#39; target=_blank>fig|59843.19.peg.320</a>	yes	<a href=&#39;?page=Annotation&feature=fig|6666666.640629.peg.3501&#39; target=_blank>fig|6666666.640629.peg.3501</a>	yes
A and B	Amino Acids and Derivatives	Alanine, serine, and glycine	Glycine Biosynthesis	L-threonine 3-dehydrogenase (EC 1.1.1.103)	<a href=&#39;?page=Annotation&feature=fig|59843.19.peg.319&#39; target=_blank>fig|59843.19.peg.319</a>	yes	<a href=&#39;?page=Annotation&feature=fig|6666666.640629.peg.3500&#39; target=_blank>fig|6666666.640629.peg.3500</a>	yes
A and B	Amino Acids and Derivatives	Alanine, serine, and glycine	Glycine Biosynthesis	Serine hydroxymethyltransferase (EC 2.1.2.1)	<a href=&#39;?page=Annotation&feature=fig|59843.19.peg.1572&#39; target=_blank>fig|59843.19.peg.1572</a>	yes	<a href=&#39;?page=Annotation&feature=fig|6666666.640629.peg.3021&#39; target=_blank>fig|6666666.640629.peg.3021</a>	yes
A and B	Amino Acids and Derivatives	Alanine, serine, and glycine	Glycine and Serine Utilization	2-amino-3-ketobutyrate coenzyme A ligase (EC 2.3.1.29)	<a href=&#39;?page=Annotation&feature=fig|59843.19.peg.320&#39; target=_blank>fig|59843.19.peg.320</a>	yes	<a href=&#39;?page=Annotation&feature=fig|6666666.640629.peg.3501&#39; target=_blank>fig|6666666.640629.peg.3501</a>	yes
A and B	Amino Acids and Derivatives	Alanine, serine, and glycine	Glycine and Serine Utilization	Aminomethyltransferase (glycine cleavage system T protein) (EC 2.1.2.10)	<a href=&#39;?page=Annotation&feature=fig|59843.19.peg.4804&#39; target=_blank>fig|59843.19.peg.4804</a>	yes	<a href=&#39;?page=Annotation&feature=fig|6666666.640629.peg.347&#39; target=_blank>fig|6666666.640629.peg.347</a>	yes
A and B	Amino Acids and Derivatives	Alanine, serine, and glycine	Glycine and Serine Utilization	D-3-phosphoglycerate dehydrogenase (EC 1.1.1.95)	<a href=&#39;?page=Annotation&feature=fig|59843.19.peg.967&#39; target=_blank>fig|59843.19.peg.967</a>, <a href=&#39;?page=Annotation&feature=fig|59843.19.peg.4102&#39; target=_blank>fig|59843.19.peg.4102</a>	yes	<a href=&#39;?page=Annotation&feature=fig|6666666.640629.peg.646&#39; target=_blank>fig|6666666.640629.peg.646</a>, <a href=&#39;?page=Annotation&feature=fig|6666666.640629.peg.1179&#39; target=_blank>fig|6666666.640629.peg.1179</a>, <a href=&#39;?page=Annotation&feature=fig|6666666.640629.peg.2884&#39; target=_blank>fig|6666666.640629.peg.2884</a>, <a href=&#39;?page=Annotation&feature=fig|66666…	yes
A and B	Amino Acids and Derivatives	Alanine, serine, and glycine	Glycine and Serine Utilization	Glycerate kinase (EC 2.7.1.31)	<a href=&#39;?page=Annotation&feature=fig|59843.19.peg.951&#39; target=_blank>fig|59843.19.peg.951</a>, <a href=&#39;?page=Annotation&feature=fig|59843.19.peg.1177&#39; target=_blank>fig|59843.19.peg.1177</a>, <a href=&#39;?page=Annotation&feature=fig|59843.19.peg.1540&#39; target=_blank>fig|59843.19.peg.1540</a>, <a href=&#39;?page=Annotation&feature=fig|59843.19.peg.1731&#39; target=_blank>fig|…	yes	<a href=&#39;?page=Annotation&feature=fig|6666666.640629.peg.995&#39; target=_blank>fig|6666666.640629.peg.995</a>, <a href=&#39;?page=Annotation&feature=fig|6666666.640629.peg.4094&#39; target=_blank>fig|6666666.640629.peg.4094</a>	yes
A and B	Amino Acids and Derivatives	Alanine, serine, and glycine	Glycine and Serine Utilization	Glycine cleavage system H protein	<a href=&#39;?page=Annotation&feature=fig|59843.19.peg.4806&#39; target=_blank>fig|59843.19.peg.4806</a>	yes	<a href=&#39;?page=Annotation&feature=fig|6666666.640629.peg.759&#39; target=_blank>fig|6666666.640629.peg.759</a>	yes
A and B	Amino Acids and Derivatives	Alanine, serine, and glycine	Glycine and Serine Utilization	Glycine dehydrogenase [decarboxylating] (glycine cleavage system P1 protein) (EC 1.4.4.2)	<a href=&#39;?page=Annotation&feature=fig|59843.19.peg.4803&#39; target=_blank>fig|59843.19.peg.4803</a>	yes	<a href=&#39;?page=Annotation&feature=fig|6666666.640629.peg.348&#39; target=_blank>fig|6666666.640629.peg.348</a>	yes
A and B	Amino Acids and Derivatives	Alanine, serine, and glycine	Glycine and Serine Utilization	Glycine dehydrogenase [decarboxylating] (glycine cleavage system P2 protein) (EC 1.4.4.2)	<a href=&#39;?page=Annotation&feature=fig|59843.19.peg.4802&#39; target=_blank>fig|59843.19.peg.4802</a>	yes	<a href=&#39;?page=Annotation&feature=fig|6666666.640629.peg.349&#39; target=_blank>fig|6666666.640629.peg.349</a>	yes
A and B	Amino Acids and Derivatives	Alanine, serine, and glycine	Glycine and Serine Utilization	L-serine dehydratase, alpha subunit (EC 4.3.1.17)	<a href=&#39;?page=Annotation&feature=fig|59843.19.peg.2515&#39; target=_blank>fig|59843.19.peg.2515</a>	yes	<a href=&#39;?page=Annotation&feature=fig|6666666.640629.peg.2389&#39; target=_blank>fig|6666666.640629.peg.2389</a>	yes
A and B	Amino Acids and Derivatives	Alanine, serine, and glycine	Glycine and Serine Utilization	L-serine dehydratase, beta subunit (EC 4.3.1.17)	<a href=&#39;?page=Annotation&feature=fig|59843.19.peg.2514&#39; target=_blank>fig|59843.19.peg.2514</a>	yes	<a href=&#39;?page=Annotation&feature=fig|6666666.640629.peg.2388&#39; target=_blank>fig|6666666.640629.peg.2388</a>	yes
A and B	Amino Acids and Derivatives	Alanine, serine, and glycine	Glycine and Serine Utilization	Serine hydroxymethyltransferase (EC 2.1.2.1)	<a href=&#39;?page=Annotation&feature=fig|59843.19.peg.1572&#39; target=_blank>fig|59843.19.peg.1572</a>	yes	<a href=&#39;?page=Annotation&feature=fig|6666666.640629.peg.3021&#39; target=_blank>fig|6666666.640629.peg.3021</a>	yes
A and B	Amino Acids and Derivatives	Alanine, serine, and glycine	Glycine and Serine Utilization	Seryl-tRNA synthetase (EC 6.1.1.11)	<a href=&#39;?page=Annotation&feature=fig|59843.19.peg.1742&#39; target=_blank>fig|59843.19.peg.1742</a>, <a href=&#39;?page=Annotation&feature=fig|59843.19.peg.2066&#39; target=_blank>fig|59843.19.peg.2066</a>	yes	<a href=&#39;?page=Annotation&feature=fig|6666666.640629.peg.2939&#39; target=_blank>fig|6666666.640629.peg.2939</a>	yes
A and B	Amino Acids and Derivatives	Alanine, serine, and glycine	Glycine cleavage system	Aminomethyltransferase (glycine cleavage system T protein) (EC 2.1.2.10)	<a href=&#39;?page=Annotation&feature=fig|59843.19.peg.4804&#39; target=_blank>fig|59843.19.peg.4804</a>	yes	<a href=&#39;?page=Annotation&feature=fig|6666666.640629.peg.347&#39; target=_blank>fig|6666666.640629.peg.347</a>	yes
A and B	Amino Acids and Derivatives	Alanine, serine, and glycine	Glycine cleavage system	Glycine cleavage system H protein	<a href=&#39;?page=Annotation&feature=fig|59843.19.peg.4806&#39; target=_blank>fig|59843.19.peg.4806</a>	yes	<a href=&#39;?page=Annotation&feature=fig|6666666.640629.peg.759&#39; target=_blank>fig|6666666.640629.peg.759</a>	yes
A and B	Amino Acids and Derivatives	Alanine, serine, and glycine	Glycine cleavage system	Glycine dehydrogenase [decarboxylating] (glycine cleavage system P1 protein) (EC 1.4.4.2)	<a href=&#39;?page=Annotation&feature=fig|59843.19.peg.4803&#39; target=_blank>fig|59843.19.peg.4803</a>	yes	<a href=&#39;?page=Annotation&feature=fig|6666666.640629.peg.348&#39; target=_blank>fig|6666666.640629.peg.348</a>	yes
A and B	Amino Acids and Derivatives	Alanine, serine, and glycine	Glycine cleavage system	Glycine dehydrogenase [decarboxylating] (glycine cleavage system P2 protein) (EC 1.4.4.2)	<a href=&#39;?page=Annotation&feature=fig|59843.19.peg.4802&#39; target=_blank>fig|59843.19.peg.4802</a>	yes	<a href=&#39;?page=Annotation&feature=fig|6666666.640629.peg.349&#39; target=_blank>fig|6666666.640629.peg.349</a>	yes
A and B	Amino Acids and Derivatives	Alanine, serine, and glycine	Serine Biosynthesis	D-3-phosphoglycerate dehydrogenase (EC 1.1.1.95)	<a href=&#39;?page=Annotation&feature=fig|59843.19.peg.967&#39; target=_blank>fig|59843.19.peg.967</a>, <a href=&#39;?page=Annotation&feature=fig|59843.19.peg.4102&#39; target=_blank>fig|59843.19.peg.4102</a>	yes	<a href=&#39;?page=Annotation&feature=fig|6666666.640629.peg.646&#39; target=_blank>fig|6666666.640629.peg.646</a>, <a href=&#39;?page=Annotation&feature=fig|6666666.640629.peg.1179&#39; target=_blank>fig|6666666.640629.peg.1179</a>, <a href=&#39;?page=Annotation&feature=fig|6666666.640629.peg.2884&#39; target=_blank>fig|6666666.640629.peg.2884</a>, <a href=&#39;?page=Annotation&feature=fig|66666…	yes
A and B	Amino Acids and Derivatives	Alanine, serine, and glycine	Serine Biosynthesis	Serine hydroxymethyltransferase (EC 2.1.2.1)	<a href=&#39;?page=Annotation&feature=fig|59843.19.peg.1572&#39; target=_blank>fig|59843.19.peg.1572</a>	yes	<a href=&#39;?page=Annotation&feature=fig|6666666.640629.peg.3021&#39; target=_blank>fig|6666666.640629.peg.3021</a>	yes
A	Amino Acids and Derivatives	Alanine, serine, and glycine	Glycine and Serine Utilization	Phosphoserine aminotransferase (EC 2.6.1.52)	<a href=&#39;?page=Annotation&feature=fig|59843.19.peg.647&#39; target=_blank>fig|59843.19.peg.647</a>	yes	<input type=&#39;button&#39; class=&#39;button&#39; value=&#39;find&#39; onclick=&#39;window.open("?page=SearchGene&fr=Phosphoserine aminotransferase (EC 2.6.1.52)&organism=6666666.640629&subsystem=Glycine_and_Serine_Utilization&template_gene=fig|59843.19.peg.647");&#39;>	no
A	Amino Acids and Derivatives	Alanine, serine, and glycine	Glycine and Serine Utilization	Phosphoserine phosphatase (EC 3.1.3.3)	<a href=&#39;?page=Annotation&feature=fig|59843.19.peg.5343&#39; target=_blank>fig|59843.19.peg.5343</a>	yes	<input type=&#39;button&#39; class=&#39;button&#39; value=&#39;find&#39; onclick=&#39;window.open("?page=SearchGene&fr=Phosphoserine phosphatase (EC 3.1.3.3)&organism=6666666.640629&subsystem=Glycine_and_Serine_Utilization&template_gene=fig|59843.19.peg.5343");&#39;>	no
B	Amino Acids and Derivatives	Alanine, serine, and glycine	Glycine and Serine Utilization	L-serine dehydratase, (PLP)-dependent (EC 4.3.1.17)	<input type=&#39;button&#39; value=&#39;find&#39; onclick=&#39;window.open("?page=SearchGene&fr=L-serine dehydratase, (PLP)-dependent (EC 4.3.1.17)&organism=59843.19&subsystem=Glycine_and_Serine_Utilization&template_gene=fig|6666666.640629.peg.1541");&#39;>	no	<a href=&#39;?page=Annotation&feature=fig|6666666.640629.peg.1541&#39; target=_blank>fig|6666666.640629.peg.1541</a>, <a href=&#39;?page=Annotation&feature=fig|6666666.640629.peg.4310&#39; target=_blank>fig|6666666.640629.peg.4310</a>	yes
B	Amino Acids and Derivatives	Alanine, serine, and glycine	Glycine cleavage system	Sodium/glycine symporter GlyP	<input type=&#39;button&#39; value=&#39;find&#39; onclick=&#39;window.open("?page=SearchGene&fr=Sodium/glycine symporter GlyP&organism=59843.19&subsystem=Glycine_cleavage_system&template_gene=fig|6666666.640629.peg.1042");&#39;>	no	<a href=&#39;?page=Annotation&feature=fig|6666666.640629.peg.1042&#39; target=_blank>fig|6666666.640629.peg.1042</a>, <a href=&#39;?page=Annotation&feature=fig|6666666.640629.peg.3237&#39; target=_blank>fig|6666666.640629.peg.3237</a>, <a href=&#39;?page=Annotation&feature=fig|6666666.640629.peg.3959&#39; target=_blank>fig|6666666.640629.peg.3959</a>	yes
A and B	Amino Acids and Derivatives	Arginine; urea cycle, polyamines	Arginine Deiminase Pathway	Arginine pathway regulatory protein ArgR, repressor of arg regulon	<a href=&#39;?page=Annotation&feature=fig|59843.19.peg.4044&#39; target=_blank>fig|59843.19.peg.4044</a>	yes	<a href=&#39;?page=Annotation&feature=fig|6666666.640629.peg.380&#39; target=_blank>fig|6666666.640629.peg.380</a>	yes
A and B	Amino Acids and Derivatives	Arginine; urea cycle, polyamines	Arginine Deiminase Pathway	Ornithine carbamoyltransferase (EC 2.1.3.3)	<a href=&#39;?page=Annotation&feature=fig|59843.19.peg.1499&#39; target=_blank>fig|59843.19.peg.1499</a>	yes	<a href=&#39;?page=Annotation&feature=fig|6666666.640629.peg.3906&#39; target=_blank>fig|6666666.640629.peg.3906</a>	yes
A and B	Amino Acids and Derivatives	Arginine; urea cycle, polyamines	Arginine and Ornithine Degradation	Agmatinase (EC 3.5.3.11)	<a href=&#39;?page=Annotation&feature=fig|59843.19.peg.2094&#39; target=_blank>fig|59843.19.peg.2094</a>	yes	<a href=&#39;?page=Annotation&feature=fig|6666666.640629.peg.4382&#39; target=_blank>fig|6666666.640629.peg.4382</a>, <a href=&#39;?page=Annotation&feature=fig|6666666.640629.peg.4383&#39; target=_blank>fig|6666666.640629.peg.4383</a>	yes
A and B	Amino Acids and Derivatives	Arginine; urea cycle, polyamines	Arginine and Ornithine Degradation	Arginase (EC 3.5.3.1)	<a href=&#39;?page=Annotation&feature=fig|59843.19.peg.3932&#39; target=_blank>fig|59843.19.peg.3932</a>	yes	<a href=&#39;?page=Annotation&feature=fig|6666666.640629.peg.3914&#39; target=_blank>fig|6666666.640629.peg.3914</a>	yes
A and B	Amino Acids and Derivatives	Arginine; urea cycle, polyamines	Arginine and Ornithine Degradation	Arginine decarboxylase (EC 4.1.1.19)	<a href=&#39;?page=Annotation&feature=fig|59843.19.peg.3833&#39; target=_blank>fig|59843.19.peg.3833</a>	yes	<a href=&#39;?page=Annotation&feature=fig|6666666.640629.peg.2259&#39; target=_blank>fig|6666666.640629.peg.2259</a>	yes
A and B	Amino Acids and Derivatives	Arginine; urea cycle, polyamines	Arginine and Ornithine Degradation	Arginine pathway regulatory protein ArgR, repressor of arg regulon	<a href=&#39;?page=Annotation&feature=fig|59843.19.peg.4044&#39; target=_blank>fig|59843.19.peg.4044</a>	yes	<a href=&#39;?page=Annotation&feature=fig|6666666.640629.peg.380&#39; target=_blank>fig|6666666.640629.peg.380</a>	yes
A and B	Amino Acids and Derivatives	Arginine; urea cycle, polyamines	Arginine and Ornithine Degradation	Delta-1-pyrroline-5-carboxylate dehydrogenase (EC 1.2.1.88)	<a href=&#39;?page=Annotation&feature=fig|59843.19.peg.438&#39; target=_blank>fig|59843.19.peg.438</a>	yes	<a href=&#39;?page=Annotation&feature=fig|6666666.640629.peg.1794&#39; target=_blank>fig|6666666.640629.peg.1794</a>, <a href=&#39;?page=Annotation&feature=fig|6666666.640629.peg.2764&#39; target=_blank>fig|6666666.640629.peg.2764</a>	yes
A and B	Amino Acids and Derivatives	Arginine; urea cycle, polyamines	Arginine and Ornithine Degradation	NADP-specific glutamate dehydrogenase (EC 1.4.1.4)	<a href=&#39;?page=Annotation&feature=fig|59843.19.peg.568&#39; target=_blank>fig|59843.19.peg.568</a>	yes	<a href=&#39;?page=Annotation&feature=fig|6666666.640629.peg.1566&#39; target=_blank>fig|6666666.640629.peg.1566</a>, <a href=&#39;?page=Annotation&feature=fig|6666666.640629.peg.3181&#39; target=_blank>fig|6666666.640629.peg.3181</a>	yes
A and B	Amino Acids and Derivatives	Arginine; urea cycle, polyamines	Arginine and Ornithine Degradation	Ornithine aminotransferase (EC 2.6.1.13)	<a href=&#39;?page=Annotation&feature=fig|59843.19.peg.3931&#39; target=_blank>fig|59843.19.peg.3931</a>	yes	<a href=&#39;?page=Annotation&feature=fig|6666666.640629.peg.1441&#39; target=_blank>fig|6666666.640629.peg.1441</a>	yes
A and B	Amino Acids and Derivatives	Arginine; urea cycle, polyamines	Arginine and Ornithine Degradation	Ornithine carbamoyltransferase (EC 2.1.3.3)	<a href=&#39;?page=Annotation&feature=fig|59843.19.peg.1499&#39; target=_blank>fig|59843.19.peg.1499</a>	yes	<a href=&#39;?page=Annotation&feature=fig|6666666.640629.peg.3906&#39; target=_blank>fig|6666666.640629.peg.3906</a>	yes
A and B	Amino Acids and Derivatives	Arginine; urea cycle, polyamines	Polyamine Metabolism	5&#39;-methylthioadenosine nucleosidase (EC 3.2.2.16)	<a href=&#39;?page=Annotation&feature=fig|59843.19.peg.3848&#39; target=_blank>fig|59843.19.peg.3848</a>	yes	<a href=&#39;?page=Annotation&feature=fig|6666666.640629.peg.236&#39; target=_blank>fig|6666666.640629.peg.236</a>, <a href=&#39;?page=Annotation&feature=fig|6666666.640629.peg.1241&#39; target=_blank>fig|6666666.640629.peg.1241</a>, <a href=&#39;?page=Annotation&feature=fig|6666666.640629.peg.1973&#39; target=_blank>fig|6666666.640629.peg.1973</a>	yes
A and B	Amino Acids and Derivatives	Arginine; urea cycle, polyamines	Polyamine Metabolism	Agmatinase (EC 3.5.3.11)	<a href=&#39;?page=Annotation&feature=fig|59843.19.peg.2094&#39; target=_blank>fig|59843.19.peg.2094</a>	yes	<a href=&#39;?page=Annotation&feature=fig|6666666.640629.peg.4382&#39; target=_blank>fig|6666666.640629.peg.4382</a>, <a href=&#39;?page=Annotation&feature=fig|6666666.640629.peg.4383&#39; target=_blank>fig|6666666.640629.peg.4383</a>	yes
A and B	Amino Acids and Derivatives	Arginine; urea cycle, polyamines	Polyamine Metabolism	Arginine decarboxylase (EC 4.1.1.19)	<a href=&#39;?page=Annotation&feature=fig|59843.19.peg.3833&#39; target=_blank>fig|59843.19.peg.3833</a>	yes	<a href=&#39;?page=Annotation&feature=fig|6666666.640629.peg.2259&#39; target=_blank>fig|6666666.640629.peg.2259</a>	yes
A and B	Amino Acids and Derivatives	Arginine; urea cycle, polyamines	Polyamine Metabolism	S-adenosylmethionine decarboxylase proenzyme (EC 4.1.1.50), prokaryotic class 1B	<a href=&#39;?page=Annotation&feature=fig|59843.19.peg.3419&#39; target=_blank>fig|59843.19.peg.3419</a>	yes	<a href=&#39;?page=Annotation&feature=fig|6666666.640629.peg.97&#39; target=_blank>fig|6666666.640629.peg.97</a>	yes
A and B	Amino Acids and Derivatives	Arginine; urea cycle, polyamines	Polyamine Metabolism	Spermidine synthase (EC 2.5.1.16)	<a href=&#39;?page=Annotation&feature=fig|59843.19.peg.2093&#39; target=_blank>fig|59843.19.peg.2093</a>	yes	<a href=&#39;?page=Annotation&feature=fig|6666666.640629.peg.65&#39; target=_blank>fig|6666666.640629.peg.65</a>, <a href=&#39;?page=Annotation&feature=fig|6666666.640629.peg.4381&#39; target=_blank>fig|6666666.640629.peg.4381</a>	yes
A	Amino Acids and Derivatives	Arginine; urea cycle, polyamines	Polyamine Metabolism	Putrescine transport ATP-binding protein PotA (TC 3.A.1.11.1)	<a href=&#39;?page=Annotation&feature=fig|59843.19.peg.2886&#39; target=_blank>fig|59843.19.peg.2886</a>, <a href=&#39;?page=Annotation&feature=fig|59843.19.peg.3802&#39; target=_blank>fig|59843.19.peg.3802</a>, <a href=&#39;?page=Annotation&feature=fig|59843.19.peg.5202&#39; target=_blank>fig|59843.19.peg.5202</a>	yes	<input type=&#39;button&#39; class=&#39;button&#39; value=&#39;find&#39; onclick=&#39;window.open("?page=SearchGene&fr=Putrescine transport ATP-binding protein PotA (TC 3.A.1.11.1)&organism=6666666.640629&subsystem=Polyamine_Metabolism&template_gene=fig|59843.19.peg.2886");&#39;>	no
A	Amino Acids and Derivatives	Arginine; urea cycle, polyamines	Polyamine Metabolism	S-adenosylmethionine decarboxylase proenzyme (EC 4.1.1.50), prokaryotic class 1A	<a href=&#39;?page=Annotation&feature=fig|59843.19.peg.744&#39; target=_blank>fig|59843.19.peg.744</a>	yes	<input type=&#39;button&#39; class=&#39;button&#39; value=&#39;find&#39; onclick=&#39;window.open("?page=SearchGene&fr=S-adenosylmethionine decarboxylase proenzyme (EC 4.1.1.50), prokaryotic class 1A&organism=6666666.640629&subsystem=Polyamine_Metabolism&template_gene=fig|59843.19.peg.744");&#39;>	no
B	Amino Acids and Derivatives	Arginine; urea cycle, polyamines	Arginine Deiminase Pathway	Arginine deiminase (EC 3.5.3.6)	<input type=&#39;button&#39; value=&#39;find&#39; onclick=&#39;window.open("?page=SearchGene&fr=Arginine deiminase (EC 3.5.3.6)&organism=59843.19&subsystem=Arginine_Deiminase_Pathway&template_gene=fig|6666666.640629.peg.799");&#39;>	no	<a href=&#39;?page=Annotation&feature=fig|6666666.640629.peg.799&#39; target=_blank>fig|6666666.640629.peg.799</a>	yes
B	Amino Acids and Derivatives	Arginine; urea cycle, polyamines	Arginine and Ornithine Degradation	Arginine utilization protein RocB	<input type=&#39;button&#39; value=&#39;find&#39; onclick=&#39;window.open("?page=SearchGene&fr=Arginine utilization protein RocB&organism=59843.19&subsystem=Arginine_and_Ornithine_Degradation&template_gene=fig|6666666.640629.peg.416");&#39;>	no	<a href=&#39;?page=Annotation&feature=fig|6666666.640629.peg.416&#39; target=_blank>fig|6666666.640629.peg.416</a>	yes
B	Amino Acids and Derivatives	Arginine; urea cycle, polyamines	Putrescine utilization pathways	Gamma-aminobutyrate:alpha-ketoglutarate aminotransferase (EC 2.6.1.19)	<input type=&#39;button&#39; value=&#39;find&#39; onclick=&#39;window.open("?page=SearchGene&fr=Gamma-aminobutyrate:alpha-ketoglutarate aminotransferase (EC 2.6.1.19)&organism=59843.19&subsystem=Putrescine_utilization_pathways&template_gene=fig|6666666.640629.peg.1221");&#39;>	no	<a href=&#39;?page=Annotation&feature=fig|6666666.640629.peg.1221&#39; target=_blank>fig|6666666.640629.peg.1221</a>, <a href=&#39;?page=Annotation&feature=fig|6666666.640629.peg.1255&#39; target=_blank>fig|6666666.640629.peg.1255</a>	yes
A and B	Amino Acids and Derivatives	Aromatic amino acids and derivatives	Chorismate: Intermediate for synthesis of Tryptophan, PAPA antibiotics, PABA, 3-hydroxyanthranilate and more.	Aminodeoxychorismate lyase (EC 4.1.3.38)	<a href=&#39;?page=Annotation&feature=fig|59843.19.peg.2051&#39; target=_blank>fig|59843.19.peg.2051</a>	yes	<a href=&#39;?page=Annotation&feature=fig|6666666.640629.peg.3892&#39; target=_blank>fig|6666666.640629.peg.3892</a>	yes
A and B	Amino Acids and Derivatives	Aromatic amino acids and derivatives	Chorismate: Intermediate for synthesis of Tryptophan, PAPA antibiotics, PABA, 3-hydroxyanthranilate and more.	Anthranilate phosphoribosyltransferase (EC 2.4.2.18)	<a href=&#39;?page=Annotation&feature=fig|59843.19.peg.4143&#39; target=_blank>fig|59843.19.peg.4143</a>	yes	<a href=&#39;?page=Annotation&feature=fig|6666666.640629.peg.3301&#39; target=_blank>fig|6666666.640629.peg.3301</a>	yes
A and B	Amino Acids and Derivatives	Aromatic amino acids and derivatives	Chorismate: Intermediate for synthesis of Tryptophan, PAPA antibiotics, PABA, 3-hydroxyanthranilate and more.	Anthranilate synthase, aminase component (EC 4.1.3.27)	<a href=&#39;?page=Annotation&feature=fig|59843.19.peg.4142&#39; target=_blank>fig|59843.19.peg.4142</a>	yes	<a href=&#39;?page=Annotation&feature=fig|6666666.640629.peg.3300&#39; target=_blank>fig|6666666.640629.peg.3300</a>	yes
A and B	Amino Acids and Derivatives	Aromatic amino acids and derivatives	Chorismate: Intermediate for synthesis of Tryptophan, PAPA antibiotics, PABA, 3-hydroxyanthranilate and more.	Indole-3-glycerol phosphate synthase (EC 4.1.1.48)	<a href=&#39;?page=Annotation&feature=fig|59843.19.peg.4144&#39; target=_blank>fig|59843.19.peg.4144</a>	yes	<a href=&#39;?page=Annotation&feature=fig|6666666.640629.peg.3302&#39; target=_blank>fig|6666666.640629.peg.3302</a>	yes
A and B	Amino Acids and Derivatives	Aromatic amino acids and derivatives	Chorismate: Intermediate for synthesis of Tryptophan, PAPA antibiotics, PABA, 3-hydroxyanthranilate and more.	Isochorismate synthase (EC 5.4.4.2)	<a href=&#39;?page=Annotation&feature=fig|59843.19.peg.210&#39; target=_blank>fig|59843.19.peg.210</a>	yes	<a href=&#39;?page=Annotation&feature=fig|6666666.640629.peg.693&#39; target=_blank>fig|6666666.640629.peg.693</a>	yes
A and B	Amino Acids and Derivatives	Aromatic amino acids and derivatives	Chorismate: Intermediate for synthesis of Tryptophan, PAPA antibiotics, PABA, 3-hydroxyanthranilate and more.	Para-aminobenzoate synthase, amidotransferase component (EC 2.6.1.85)	<a href=&#39;?page=Annotation&feature=fig|59843.19.peg.2050&#39; target=_blank>fig|59843.19.peg.2050</a>	yes	<a href=&#39;?page=Annotation&feature=fig|6666666.640629.peg.3307&#39; target=_blank>fig|6666666.640629.peg.3307</a>	yes
A and B	Amino Acids and Derivatives	Aromatic amino acids and derivatives	Chorismate: Intermediate for synthesis of Tryptophan, PAPA antibiotics, PABA, 3-hydroxyanthranilate and more.	Para-aminobenzoate synthase, aminase component (EC 2.6.1.85)	<a href=&#39;?page=Annotation&feature=fig|59843.19.peg.2049&#39; target=_blank>fig|59843.19.peg.2049</a>	yes	<a href=&#39;?page=Annotation&feature=fig|6666666.640629.peg.3892&#39; target=_blank>fig|6666666.640629.peg.3892</a>	yes
A and B	Amino Acids and Derivatives	Aromatic amino acids and derivatives	Chorismate: Intermediate for synthesis of Tryptophan, PAPA antibiotics, PABA, 3-hydroxyanthranilate and more.	Phosphoribosylanthranilate isomerase (EC 5.3.1.24)	<a href=&#39;?page=Annotation&feature=fig|59843.19.peg.4145&#39; target=_blank>fig|59843.19.peg.4145</a>	yes	<a href=&#39;?page=Annotation&feature=fig|6666666.640629.peg.3303&#39; target=_blank>fig|6666666.640629.peg.3303</a>	yes
A and B	Amino Acids and Derivatives	Aromatic amino acids and derivatives	Chorismate: Intermediate for synthesis of Tryptophan, PAPA antibiotics, PABA, 3-hydroxyanthranilate and more.	Phosphoribosylformimino-5-aminoimidazole carboxamide ribotide isomerase (EC 5.3.1.16)	<a href=&#39;?page=Annotation&feature=fig|59843.19.peg.2130&#39; target=_blank>fig|59843.19.peg.2130</a>	yes	<a href=&#39;?page=Annotation&feature=fig|6666666.640629.peg.866&#39; target=_blank>fig|6666666.640629.peg.866</a>	yes
A and B	Amino Acids and Derivatives	Aromatic amino acids and derivatives	Chorismate: Intermediate for synthesis of Tryptophan, PAPA antibiotics, PABA, 3-hydroxyanthranilate and more.	Tryptophan synthase alpha chain (EC 4.2.1.20)	<a href=&#39;?page=Annotation&feature=fig|59843.19.peg.4147&#39; target=_blank>fig|59843.19.peg.4147</a>	yes	<a href=&#39;?page=Annotation&feature=fig|6666666.640629.peg.3306&#39; target=_blank>fig|6666666.640629.peg.3306</a>	yes
A and B	Amino Acids and Derivatives	Aromatic amino acids and derivatives	Chorismate: Intermediate for synthesis of Tryptophan, PAPA antibiotics, PABA, 3-hydroxyanthranilate and more.	Tryptophan synthase beta chain (EC 4.2.1.20)	<a href=&#39;?page=Annotation&feature=fig|59843.19.peg.4146&#39; target=_blank>fig|59843.19.peg.4146</a>	yes	<a href=&#39;?page=Annotation&feature=fig|6666666.640629.peg.3304&#39; target=_blank>fig|6666666.640629.peg.3304</a>, <a href=&#39;?page=Annotation&feature=fig|6666666.640629.peg.3305&#39; target=_blank>fig|6666666.640629.peg.3305</a>	yes
A and B	Amino Acids and Derivatives	Aromatic amino acids and derivatives	Common Pathway For Synthesis of Aromatic Compounds (DAHP synthase to chorismate)	2-keto-3-deoxy-D-arabino-heptulosonate-7-phosphate synthase I beta (EC 2.5.1.54)	<a href=&#39;?page=Annotation&feature=fig|59843.19.peg.405&#39; target=_blank>fig|59843.19.peg.405</a>, <a href=&#39;?page=Annotation&feature=fig|59843.19.peg.656&#39; target=_blank>fig|59843.19.peg.656</a>	yes	<a href=&#39;?page=Annotation&feature=fig|6666666.640629.peg.33&#39; target=_blank>fig|6666666.640629.peg.33</a>	yes
A and B	Amino Acids and Derivatives	Aromatic amino acids and derivatives	Common Pathway For Synthesis of Aromatic Compounds (DAHP synthase to chorismate)	3-dehydroquinate dehydratase II (EC 4.2.1.10)	<a href=&#39;?page=Annotation&feature=fig|59843.19.peg.4018&#39; target=_blank>fig|59843.19.peg.4018</a>	yes	<a href=&#39;?page=Annotation&feature=fig|6666666.640629.peg.358&#39; target=_blank>fig|6666666.640629.peg.358</a>	yes
A and B	Amino Acids and Derivatives	Aromatic amino acids and derivatives	Common Pathway For Synthesis of Aromatic Compounds (DAHP synthase to chorismate)	3-dehydroquinate synthase (EC 4.2.3.4)	<a href=&#39;?page=Annotation&feature=fig|59843.19.peg.4140&#39; target=_blank>fig|59843.19.peg.4140</a>	yes	<a href=&#39;?page=Annotation&feature=fig|6666666.640629.peg.2502&#39; target=_blank>fig|6666666.640629.peg.2502</a>	yes
A and B	Amino Acids and Derivatives	Aromatic amino acids and derivatives	Common Pathway For Synthesis of Aromatic Compounds (DAHP synthase to chorismate)	Chorismate synthase (EC 4.2.3.5)	<a href=&#39;?page=Annotation&feature=fig|59843.19.peg.4139&#39; target=_blank>fig|59843.19.peg.4139</a>	yes	<a href=&#39;?page=Annotation&feature=fig|6666666.640629.peg.2503&#39; target=_blank>fig|6666666.640629.peg.2503</a>	yes
A and B	Amino Acids and Derivatives	Aromatic amino acids and derivatives	Common Pathway For Synthesis of Aromatic Compounds (DAHP synthase to chorismate)	Shikimate 5-dehydrogenase I alpha (EC 1.1.1.25)	<a href=&#39;?page=Annotation&feature=fig|59843.19.peg.3615&#39; target=_blank>fig|59843.19.peg.3615</a>	yes	<a href=&#39;?page=Annotation&feature=fig|6666666.640629.peg.248&#39; target=_blank>fig|6666666.640629.peg.248</a>	yes
A and B	Amino Acids and Derivatives	Aromatic amino acids and derivatives	Common Pathway For Synthesis of Aromatic Compounds (DAHP synthase to chorismate)	Shikimate kinase I (EC 2.7.1.71)	<a href=&#39;?page=Annotation&feature=fig|59843.19.peg.3838&#39; target=_blank>fig|59843.19.peg.3838</a>	yes	<a href=&#39;?page=Annotation&feature=fig|6666666.640629.peg.342&#39; target=_blank>fig|6666666.640629.peg.342</a>	yes
A and B	Amino Acids and Derivatives	Aromatic amino acids and derivatives	Phenylalanine and Tyrosine Branches from Chorismate	Biosynthetic Aromatic amino acid aminotransferase beta (EC 2.6.1.57)	<a href=&#39;?page=Annotation&feature=fig|59843.19.peg.4148&#39; target=_blank>fig|59843.19.peg.4148</a>	yes	<a href=&#39;?page=Annotation&feature=fig|6666666.640629.peg.2500&#39; target=_blank>fig|6666666.640629.peg.2500</a>	yes
A and B	Amino Acids and Derivatives	Aromatic amino acids and derivatives	Phenylalanine and Tyrosine Branches from Chorismate	Chorismate mutase I (EC 5.4.99.5)	<a href=&#39;?page=Annotation&feature=fig|59843.19.peg.405&#39; target=_blank>fig|59843.19.peg.405</a>	yes	<a href=&#39;?page=Annotation&feature=fig|6666666.640629.peg.33&#39; target=_blank>fig|6666666.640629.peg.33</a>	yes
A and B	Amino Acids and Derivatives	Aromatic amino acids and derivatives	Phenylalanine and Tyrosine Branches from Chorismate	Chorismate mutase II (EC 5.4.99.5)	<a href=&#39;?page=Annotation&feature=fig|59843.19.peg.4141&#39; target=_blank>fig|59843.19.peg.4141</a>	yes	<a href=&#39;?page=Annotation&feature=fig|6666666.640629.peg.2501&#39; target=_blank>fig|6666666.640629.peg.2501</a>	yes
A and B	Amino Acids and Derivatives	Aromatic amino acids and derivatives	Phenylalanine and Tyrosine Branches from Chorismate	Prephenate dehydratase (EC 4.2.1.51)	<a href=&#39;?page=Annotation&feature=fig|59843.19.peg.3459&#39; target=_blank>fig|59843.19.peg.3459</a>	yes	<a href=&#39;?page=Annotation&feature=fig|6666666.640629.peg.187&#39; target=_blank>fig|6666666.640629.peg.187</a>	yes
A and B	Amino Acids and Derivatives	Aromatic amino acids and derivatives	Phenylalanine and Tyrosine Branches from Chorismate	Prephenate dehydrogenase (EC 1.3.1.12)	<a href=&#39;?page=Annotation&feature=fig|59843.19.peg.4149&#39; target=_blank>fig|59843.19.peg.4149</a>	yes	<a href=&#39;?page=Annotation&feature=fig|6666666.640629.peg.2499&#39; target=_blank>fig|6666666.640629.peg.2499</a>	yes
A and B	Amino Acids and Derivatives	Aromatic amino acids and derivatives	Tryptophan synthesis	Aminodeoxychorismate lyase (EC 4.1.3.38)	<a href=&#39;?page=Annotation&feature=fig|59843.19.peg.2051&#39; target=_blank>fig|59843.19.peg.2051</a>	yes	<a href=&#39;?page=Annotation&feature=fig|6666666.640629.peg.3892&#39; target=_blank>fig|6666666.640629.peg.3892</a>	yes
A and B	Amino Acids and Derivatives	Aromatic amino acids and derivatives	Tryptophan synthesis	Anthranilate phosphoribosyltransferase (EC 2.4.2.18)	<a href=&#39;?page=Annotation&feature=fig|59843.19.peg.4143&#39; target=_blank>fig|59843.19.peg.4143</a>	yes	<a href=&#39;?page=Annotation&feature=fig|6666666.640629.peg.3301&#39; target=_blank>fig|6666666.640629.peg.3301</a>	yes
A and B	Amino Acids and Derivatives	Aromatic amino acids and derivatives	Tryptophan synthesis	Anthranilate synthase, aminase component (EC 4.1.3.27)	<a href=&#39;?page=Annotation&feature=fig|59843.19.peg.4142&#39; target=_blank>fig|59843.19.peg.4142</a>	yes	<a href=&#39;?page=Annotation&feature=fig|6666666.640629.peg.3300&#39; target=_blank>fig|6666666.640629.peg.3300</a>	yes
A and B	Amino Acids and Derivatives	Aromatic amino acids and derivatives	Tryptophan synthesis	Indole-3-glycerol phosphate synthase (EC 4.1.1.48)	<a href=&#39;?page=Annotation&feature=fig|59843.19.peg.4144&#39; target=_blank>fig|59843.19.peg.4144</a>	yes	<a href=&#39;?page=Annotation&feature=fig|6666666.640629.peg.3302&#39; target=_blank>fig|6666666.640629.peg.3302</a>	yes
A and B	Amino Acids and Derivatives	Aromatic amino acids and derivatives	Tryptophan synthesis	Para-aminobenzoate synthase, amidotransferase component (EC 2.6.1.85)	<a href=&#39;?page=Annotation&feature=fig|59843.19.peg.2050&#39; target=_blank>fig|59843.19.peg.2050</a>	yes	<a href=&#39;?page=Annotation&feature=fig|6666666.640629.peg.3307&#39; target=_blank>fig|6666666.640629.peg.3307</a>	yes
A and B	Amino Acids and Derivatives	Aromatic amino acids and derivatives	Tryptophan synthesis	Para-aminobenzoate synthase, aminase component (EC 2.6.1.85)	<a href=&#39;?page=Annotation&feature=fig|59843.19.peg.2049&#39; target=_blank>fig|59843.19.peg.2049</a>	yes	<a href=&#39;?page=Annotation&feature=fig|6666666.640629.peg.3892&#39; target=_blank>fig|6666666.640629.peg.3892</a>	yes
A and B	Amino Acids and Derivatives	Aromatic amino acids and derivatives	Tryptophan synthesis	Phosphoribosylanthranilate isomerase (EC 5.3.1.24)	<a href=&#39;?page=Annotation&feature=fig|59843.19.peg.4145&#39; target=_blank>fig|59843.19.peg.4145</a>	yes	<a href=&#39;?page=Annotation&feature=fig|6666666.640629.peg.3303&#39; target=_blank>fig|6666666.640629.peg.3303</a>	yes
A and B	Amino Acids and Derivatives	Aromatic amino acids and derivatives	Tryptophan synthesis	Tryptophan synthase alpha chain (EC 4.2.1.20)	<a href=&#39;?page=Annotation&feature=fig|59843.19.peg.4147&#39; target=_blank>fig|59843.19.peg.4147</a>	yes	<a href=&#39;?page=Annotation&feature=fig|6666666.640629.peg.3306&#39; target=_blank>fig|6666666.640629.peg.3306</a>	yes
A and B	Amino Acids and Derivatives	Aromatic amino acids and derivatives	Tryptophan synthesis	Tryptophan synthase beta chain (EC 4.2.1.20)	<a href=&#39;?page=Annotation&feature=fig|59843.19.peg.4146&#39; target=_blank>fig|59843.19.peg.4146</a>	yes	<a href=&#39;?page=Annotation&feature=fig|6666666.640629.peg.3304&#39; target=_blank>fig|6666666.640629.peg.3304</a>, <a href=&#39;?page=Annotation&feature=fig|6666666.640629.peg.3305&#39; target=_blank>fig|6666666.640629.peg.3305</a>	yes
A	Amino Acids and Derivatives	Aromatic amino acids and derivatives	Chorismate: Intermediate for synthesis of Tryptophan, PAPA antibiotics, PABA, 3-hydroxyanthranilate and more.	Isochorismatase (EC 3.3.2.1)	<a href=&#39;?page=Annotation&feature=fig|59843.19.peg.1778&#39; target=_blank>fig|59843.19.peg.1778</a>	yes	<input type=&#39;button&#39; class=&#39;button&#39; value=&#39;find&#39; onclick=&#39;window.open("?page=SearchGene&fr=Isochorismatase (EC 3.3.2.1)&organism=6666666.640629&subsystem=Chorismate:_Intermediate_for_synthesis_of_Tryptophan,_PAPA_antibiotics,_PABA,_3-hydroxyanthranilate_and_more.&template_gene=fig|59843.19.peg.1778");&#39;>	no
A	Amino Acids and Derivatives	Aromatic amino acids and derivatives	Chorismate: Intermediate for synthesis of Tryptophan, PAPA antibiotics, PABA, 3-hydroxyanthranilate and more.	Isochorismatase (EC 3.3.2.1) of siderophore biosynthesis	<a href=&#39;?page=Annotation&feature=fig|59843.19.peg.208&#39; target=_blank>fig|59843.19.peg.208</a>	yes	<input type=&#39;button&#39; class=&#39;button&#39; value=&#39;find&#39; onclick=&#39;window.open("?page=SearchGene&fr=Isochorismatase (EC 3.3.2.1) of siderophore biosynthesis&organism=6666666.640629&subsystem=Chorismate:_Intermediate_for_synthesis_of_Tryptophan,_PAPA_antibiotics,_PABA,_3-hydroxyanthranilate_and_more.&template_gene=fig|59843.19.peg.208");&#39;>	no
A	Amino Acids and Derivatives	Aromatic amino acids and derivatives	Chorismate: Intermediate for synthesis of Tryptophan, PAPA antibiotics, PABA, 3-hydroxyanthranilate and more.	Isochorismate synthase (EC 5.4.4.2) of siderophore biosynthesis	<a href=&#39;?page=Annotation&feature=fig|59843.19.peg.210&#39; target=_blank>fig|59843.19.peg.210</a>	yes	<input type=&#39;button&#39; class=&#39;button&#39; value=&#39;find&#39; onclick=&#39;window.open("?page=SearchGene&fr=Isochorismate synthase (EC 5.4.4.2) of siderophore biosynthesis&organism=6666666.640629&subsystem=Chorismate:_Intermediate_for_synthesis_of_Tryptophan,_PAPA_antibiotics,_PABA,_3-hydroxyanthranilate_and_more.&template_gene=fig|59843.19.peg.210");&#39;>	no
B	Amino Acids and Derivatives	Aromatic amino acids and derivatives	Aromatic amino acid degradation	Kynurenine formamidase, bacterial (EC 3.5.1.9)	<input type=&#39;button&#39; value=&#39;find&#39; onclick=&#39;window.open("?page=SearchGene&fr=Kynurenine formamidase, bacterial (EC 3.5.1.9)&organism=59843.19&subsystem=Aromatic_amino_acid_degradation&template_gene=fig|6666666.640629.peg.4342");&#39;>	no	<a href=&#39;?page=Annotation&feature=fig|6666666.640629.peg.4342&#39; target=_blank>fig|6666666.640629.peg.4342</a>	yes
B	Amino Acids and Derivatives	Aromatic amino acids and derivatives	Aromatic amino acid degradation	Predicted 2-keto-4-pentenoate hydratase/2-oxohepta-3-ene-1,7-dioic acid hydratase	<input type=&#39;button&#39; value=&#39;find&#39; onclick=&#39;window.open("?page=SearchGene&fr=Predicted 2-keto-4-pentenoate hydratase/2-oxohepta-3-ene-1,7-dioic acid hydratase&organism=59843.19&subsystem=Aromatic_amino_acid_degradation&template_gene=fig|6666666.640629.peg.2678");&#39;>	no	<a href=&#39;?page=Annotation&feature=fig|6666666.640629.peg.2678&#39; target=_blank>fig|6666666.640629.peg.2678</a>	yes
B	Amino Acids and Derivatives	Aromatic amino acids and derivatives	Aromatic amino acid degradation	Tryptophan 2,3-dioxygenase (EC 1.13.11.11)	<input type=&#39;button&#39; value=&#39;find&#39; onclick=&#39;window.open("?page=SearchGene&fr=Tryptophan 2,3-dioxygenase (EC 1.13.11.11)&organism=59843.19&subsystem=Aromatic_amino_acid_degradation&template_gene=fig|6666666.640629.peg.3844");&#39;>	no	<a href=&#39;?page=Annotation&feature=fig|6666666.640629.peg.3844&#39; target=_blank>fig|6666666.640629.peg.3844</a>	yes
B	Amino Acids and Derivatives	Aromatic amino acids and derivatives	Chorismate: Intermediate for synthesis of Tryptophan, PAPA antibiotics, PABA, 3-hydroxyanthranilate and more.	Anthranilate synthase, amidotransferase component (EC 4.1.3.27)	<input type=&#39;button&#39; value=&#39;find&#39; onclick=&#39;window.open("?page=SearchGene&fr=Anthranilate synthase, amidotransferase component (EC 4.1.3.27)&organism=59843.19&subsystem=Chorismate:_Intermediate_for_synthesis_of_Tryptophan,_PAPA_antibiotics,_PABA,_3-hydroxyanthranilate_and_more.&template_gene=fig|6666666.640629.peg.3893");&#39;>	no	<a href=&#39;?page=Annotation&feature=fig|6666666.640629.peg.3893&#39; target=_blank>fig|6666666.640629.peg.3893</a>	yes
B	Amino Acids and Derivatives	Aromatic amino acids and derivatives	Phenylalanine and Tyrosine Branches from Chorismate	Biosynthetic Aromatic amino acid aminotransferase alpha (EC 2.6.1.57)	<input type=&#39;button&#39; value=&#39;find&#39; onclick=&#39;window.open("?page=SearchGene&fr=Biosynthetic Aromatic amino acid aminotransferase alpha (EC 2.6.1.57)&organism=59843.19&subsystem=Phenylalanine_and_Tyrosine_Branches_from_Chorismate&template_gene=fig|6666666.640629.peg.518");&#39;>	no	<a href=&#39;?page=Annotation&feature=fig|6666666.640629.peg.518&#39; target=_blank>fig|6666666.640629.peg.518</a>	yes
A and B	Amino Acids and Derivatives	Branched-chain amino acids	Branched-Chain Amino Acid Biosynthesis	2-isopropylmalate synthase (EC 2.3.3.13)	<a href=&#39;?page=Annotation&feature=fig|59843.19.peg.720&#39; target=_blank>fig|59843.19.peg.720</a>, <a href=&#39;?page=Annotation&feature=fig|59843.19.peg.914&#39; target=_blank>fig|59843.19.peg.914</a>	yes	<a href=&#39;?page=Annotation&feature=fig|6666666.640629.peg.1537&#39; target=_blank>fig|6666666.640629.peg.1537</a>	yes
A and B	Amino Acids and Derivatives	Branched-chain amino acids	Branched-Chain Amino Acid Biosynthesis	3-isopropylmalate dehydratase large subunit (EC 4.2.1.33)	<a href=&#39;?page=Annotation&feature=fig|59843.19.peg.4208&#39; target=_blank>fig|59843.19.peg.4208</a>	yes	<a href=&#39;?page=Annotation&feature=fig|6666666.640629.peg.1539&#39; target=_blank>fig|6666666.640629.peg.1539</a>	yes
A and B	Amino Acids and Derivatives	Branched-chain amino acids	Branched-Chain Amino Acid Biosynthesis	3-isopropylmalate dehydratase small subunit (EC 4.2.1.33)	<a href=&#39;?page=Annotation&feature=fig|59843.19.peg.4209&#39; target=_blank>fig|59843.19.peg.4209</a>	yes	<a href=&#39;?page=Annotation&feature=fig|6666666.640629.peg.1540&#39; target=_blank>fig|6666666.640629.peg.1540</a>	yes
A and B	Amino Acids and Derivatives	Branched-chain amino acids	Branched-Chain Amino Acid Biosynthesis	3-isopropylmalate dehydrogenase (EC 1.1.1.85)	<a href=&#39;?page=Annotation&feature=fig|59843.19.peg.716&#39; target=_blank>fig|59843.19.peg.716</a>	yes	<a href=&#39;?page=Annotation&feature=fig|6666666.640629.peg.1538&#39; target=_blank>fig|6666666.640629.peg.1538</a>	yes
A and B	Amino Acids and Derivatives	Branched-chain amino acids	Branched-Chain Amino Acid Biosynthesis	Acetolactate synthase large subunit (EC 2.2.1.6)	<a href=&#39;?page=Annotation&feature=fig|59843.19.peg.723&#39; target=_blank>fig|59843.19.peg.723</a>	yes	<a href=&#39;?page=Annotation&feature=fig|6666666.640629.peg.1534&#39; target=_blank>fig|6666666.640629.peg.1534</a>	yes
A and B	Amino Acids and Derivatives	Branched-chain amino acids	Branched-Chain Amino Acid Biosynthesis	Acetolactate synthase small subunit (EC 2.2.1.6)	<a href=&#39;?page=Annotation&feature=fig|59843.19.peg.722&#39; target=_blank>fig|59843.19.peg.722</a>	yes	<a href=&#39;?page=Annotation&feature=fig|6666666.640629.peg.1535&#39; target=_blank>fig|6666666.640629.peg.1535</a>	yes
A and B	Amino Acids and Derivatives	Branched-chain amino acids	Branched-Chain Amino Acid Biosynthesis	Branched-chain amino acid aminotransferase (EC 2.6.1.42)	<a href=&#39;?page=Annotation&feature=fig|59843.19.peg.1766&#39; target=_blank>fig|59843.19.peg.1766</a>, <a href=&#39;?page=Annotation&feature=fig|59843.19.peg.3460&#39; target=_blank>fig|59843.19.peg.3460</a>	yes	<a href=&#39;?page=Annotation&feature=fig|6666666.640629.peg.1533&#39; target=_blank>fig|6666666.640629.peg.1533</a>, <a href=&#39;?page=Annotation&feature=fig|6666666.640629.peg.2775&#39; target=_blank>fig|6666666.640629.peg.2775</a>	yes
A and B	Amino Acids and Derivatives	Branched-chain amino acids	Branched-Chain Amino Acid Biosynthesis	Dihydroxy-acid dehydratase (EC 4.2.1.9)	<a href=&#39;?page=Annotation&feature=fig|59843.19.peg.3516&#39; target=_blank>fig|59843.19.peg.3516</a>	yes	<a href=&#39;?page=Annotation&feature=fig|6666666.640629.peg.792&#39; target=_blank>fig|6666666.640629.peg.792</a>	yes
A and B	Amino Acids and Derivatives	Branched-chain amino acids	Isoleucine degradation	3-hydroxyacyl-CoA dehydrogenase (EC 1.1.1.35)	<a href=&#39;?page=Annotation&feature=fig|59843.19.peg.4182&#39; target=_blank>fig|59843.19.peg.4182</a>	yes	<a href=&#39;?page=Annotation&feature=fig|6666666.640629.peg.1069&#39; target=_blank>fig|6666666.640629.peg.1069</a>, <a href=&#39;?page=Annotation&feature=fig|6666666.640629.peg.1072&#39; target=_blank>fig|6666666.640629.peg.1072</a>, <a href=&#39;?page=Annotation&feature=fig|6666666.640629.peg.2687&#39; target=_blank>fig|6666666.640629.peg.2687</a>	yes
A and B	Amino Acids and Derivatives	Branched-chain amino acids	Isoleucine degradation	Branched-chain alpha-keto acid dehydrogenase, E1 component, alpha subunit (EC 1.2.4.4)	<a href=&#39;?page=Annotation&feature=fig|59843.19.peg.4058&#39; target=_blank>fig|59843.19.peg.4058</a>	yes	<a href=&#39;?page=Annotation&feature=fig|6666666.640629.peg.394&#39; target=_blank>fig|6666666.640629.peg.394</a>	yes
A and B	Amino Acids and Derivatives	Branched-chain amino acids	Isoleucine degradation	Branched-chain alpha-keto acid dehydrogenase, E1 component, beta subunit (EC 1.2.4.4)	<a href=&#39;?page=Annotation&feature=fig|59843.19.peg.4059&#39; target=_blank>fig|59843.19.peg.4059</a>	yes	<a href=&#39;?page=Annotation&feature=fig|6666666.640629.peg.395&#39; target=_blank>fig|6666666.640629.peg.395</a>	yes
A and B	Amino Acids and Derivatives	Branched-chain amino acids	Isoleucine degradation	Branched-chain amino acid aminotransferase (EC 2.6.1.42)	<a href=&#39;?page=Annotation&feature=fig|59843.19.peg.1766&#39; target=_blank>fig|59843.19.peg.1766</a>, <a href=&#39;?page=Annotation&feature=fig|59843.19.peg.3460&#39; target=_blank>fig|59843.19.peg.3460</a>	yes	<a href=&#39;?page=Annotation&feature=fig|6666666.640629.peg.1533&#39; target=_blank>fig|6666666.640629.peg.1533</a>, <a href=&#39;?page=Annotation&feature=fig|6666666.640629.peg.2775&#39; target=_blank>fig|6666666.640629.peg.2775</a>	yes
A and B	Amino Acids and Derivatives	Branched-chain amino acids	Isoleucine degradation	Dihydrolipoamide acyltransferase component of branched-chain alpha-keto acid dehydrogenase complex (EC 2.3.1.168)	<a href=&#39;?page=Annotation&feature=fig|59843.19.peg.4060&#39; target=_blank>fig|59843.19.peg.4060</a>	yes	<a href=&#39;?page=Annotation&feature=fig|6666666.640629.peg.396&#39; target=_blank>fig|6666666.640629.peg.396</a>	yes
A and B	Amino Acids and Derivatives	Branched-chain amino acids	Isoleucine degradation	Dihydrolipoamide dehydrogenase of branched-chain alpha-keto acid dehydrogenase (EC 1.8.1.4)	<a href=&#39;?page=Annotation&feature=fig|59843.19.peg.4057&#39; target=_blank>fig|59843.19.peg.4057</a>	yes	<a href=&#39;?page=Annotation&feature=fig|6666666.640629.peg.393&#39; target=_blank>fig|6666666.640629.peg.393</a>	yes
A and B	Amino Acids and Derivatives	Branched-chain amino acids	Leucine Biosynthesis	2-isopropylmalate synthase (EC 2.3.3.13)	<a href=&#39;?page=Annotation&feature=fig|59843.19.peg.720&#39; target=_blank>fig|59843.19.peg.720</a>, <a href=&#39;?page=Annotation&feature=fig|59843.19.peg.914&#39; target=_blank>fig|59843.19.peg.914</a>	yes	<a href=&#39;?page=Annotation&feature=fig|6666666.640629.peg.1537&#39; target=_blank>fig|6666666.640629.peg.1537</a>	yes
A and B	Amino Acids and Derivatives	Branched-chain amino acids	Leucine Biosynthesis	3-isopropylmalate dehydratase large subunit (EC 4.2.1.33)	<a href=&#39;?page=Annotation&feature=fig|59843.19.peg.4208&#39; target=_blank>fig|59843.19.peg.4208</a>	yes	<a href=&#39;?page=Annotation&feature=fig|6666666.640629.peg.1539&#39; target=_blank>fig|6666666.640629.peg.1539</a>	yes
A and B	Amino Acids and Derivatives	Branched-chain amino acids	Leucine Biosynthesis	3-isopropylmalate dehydratase small subunit (EC 4.2.1.33)	<a href=&#39;?page=Annotation&feature=fig|59843.19.peg.4209&#39; target=_blank>fig|59843.19.peg.4209</a>	yes	<a href=&#39;?page=Annotation&feature=fig|6666666.640629.peg.1540&#39; target=_blank>fig|6666666.640629.peg.1540</a>	yes
A and B	Amino Acids and Derivatives	Branched-chain amino acids	Leucine Biosynthesis	3-isopropylmalate dehydrogenase (EC 1.1.1.85)	<a href=&#39;?page=Annotation&feature=fig|59843.19.peg.716&#39; target=_blank>fig|59843.19.peg.716</a>	yes	<a href=&#39;?page=Annotation&feature=fig|6666666.640629.peg.1538&#39; target=_blank>fig|6666666.640629.peg.1538</a>	yes
A and B	Amino Acids and Derivatives	Branched-chain amino acids	Leucine Biosynthesis	Branched-chain amino acid aminotransferase (EC 2.6.1.42)	<a href=&#39;?page=Annotation&feature=fig|59843.19.peg.1766&#39; target=_blank>fig|59843.19.peg.1766</a>, <a href=&#39;?page=Annotation&feature=fig|59843.19.peg.3460&#39; target=_blank>fig|59843.19.peg.3460</a>	yes	<a href=&#39;?page=Annotation&feature=fig|6666666.640629.peg.1533&#39; target=_blank>fig|6666666.640629.peg.1533</a>, <a href=&#39;?page=Annotation&feature=fig|6666666.640629.peg.2775&#39; target=_blank>fig|6666666.640629.peg.2775</a>	yes
A and B	Amino Acids and Derivatives	Branched-chain amino acids	Valine degradation	3-hydroxyacyl-CoA dehydrogenase (EC 1.1.1.35)	<a href=&#39;?page=Annotation&feature=fig|59843.19.peg.4182&#39; target=_blank>fig|59843.19.peg.4182</a>	yes	<a href=&#39;?page=Annotation&feature=fig|6666666.640629.peg.1069&#39; target=_blank>fig|6666666.640629.peg.1069</a>, <a href=&#39;?page=Annotation&feature=fig|6666666.640629.peg.1072&#39; target=_blank>fig|6666666.640629.peg.1072</a>, <a href=&#39;?page=Annotation&feature=fig|6666666.640629.peg.2687&#39; target=_blank>fig|6666666.640629.peg.2687</a>	yes
A and B	Amino Acids and Derivatives	Branched-chain amino acids	Valine degradation	Branched-chain alpha-keto acid dehydrogenase, E1 component, alpha subunit (EC 1.2.4.4)	<a href=&#39;?page=Annotation&feature=fig|59843.19.peg.4058&#39; target=_blank>fig|59843.19.peg.4058</a>	yes	<a href=&#39;?page=Annotation&feature=fig|6666666.640629.peg.394&#39; target=_blank>fig|6666666.640629.peg.394</a>	yes
A and B	Amino Acids and Derivatives	Branched-chain amino acids	Valine degradation	Branched-chain alpha-keto acid dehydrogenase, E1 component, beta subunit (EC 1.2.4.4)	<a href=&#39;?page=Annotation&feature=fig|59843.19.peg.4059&#39; target=_blank>fig|59843.19.peg.4059</a>	yes	<a href=&#39;?page=Annotation&feature=fig|6666666.640629.peg.395&#39; target=_blank>fig|6666666.640629.peg.395</a>	yes
A and B	Amino Acids and Derivatives	Branched-chain amino acids	Valine degradation	Branched-chain amino acid aminotransferase (EC 2.6.1.42)	<a href=&#39;?page=Annotation&feature=fig|59843.19.peg.1766&#39; target=_blank>fig|59843.19.peg.1766</a>, <a href=&#39;?page=Annotation&feature=fig|59843.19.peg.3460&#39; target=_blank>fig|59843.19.peg.3460</a>	yes	<a href=&#39;?page=Annotation&feature=fig|6666666.640629.peg.1533&#39; target=_blank>fig|6666666.640629.peg.1533</a>, <a href=&#39;?page=Annotation&feature=fig|6666666.640629.peg.2775&#39; target=_blank>fig|6666666.640629.peg.2775</a>	yes
A and B	Amino Acids and Derivatives	Branched-chain amino acids	Valine degradation	Dihydrolipoamide acyltransferase component of branched-chain alpha-keto acid dehydrogenase complex (EC 2.3.1.168)	<a href=&#39;?page=Annotation&feature=fig|59843.19.peg.4060&#39; target=_blank>fig|59843.19.peg.4060</a>	yes	<a href=&#39;?page=Annotation&feature=fig|6666666.640629.peg.396&#39; target=_blank>fig|6666666.640629.peg.396</a>	yes
A and B	Amino Acids and Derivatives	Branched-chain amino acids	Valine degradation	Dihydrolipoamide dehydrogenase of branched-chain alpha-keto acid dehydrogenase (EC 1.8.1.4)	<a href=&#39;?page=Annotation&feature=fig|59843.19.peg.4057&#39; target=_blank>fig|59843.19.peg.4057</a>	yes	<a href=&#39;?page=Annotation&feature=fig|6666666.640629.peg.393&#39; target=_blank>fig|6666666.640629.peg.393</a>	yes
A	Amino Acids and Derivatives	Branched-chain amino acids	Branched-Chain Amino Acid Biosynthesis	(R)-citramalate synthase (EC 2.3.1.182)	<a href=&#39;?page=Annotation&feature=fig|59843.19.peg.228&#39; target=_blank>fig|59843.19.peg.228</a>	yes	<input type=&#39;button&#39; class=&#39;button&#39; value=&#39;find&#39; onclick=&#39;window.open("?page=SearchGene&fr=(R)-citramalate synthase (EC 2.3.1.182)&organism=6666666.640629&subsystem=Branched-Chain_Amino_Acid_Biosynthesis&template_gene=fig|59843.19.peg.228");&#39;>	no
A	Amino Acids and Derivatives	Branched-chain amino acids	Branched-Chain Amino Acid Biosynthesis	Threonine dehydratase biosynthetic (EC 4.3.1.19)	<a href=&#39;?page=Annotation&feature=fig|59843.19.peg.2951&#39; target=_blank>fig|59843.19.peg.2951</a>	yes	<input type=&#39;button&#39; class=&#39;button&#39; value=&#39;find&#39; onclick=&#39;window.open("?page=SearchGene&fr=Threonine dehydratase biosynthetic (EC 4.3.1.19)&organism=6666666.640629&subsystem=Branched-Chain_Amino_Acid_Biosynthesis&template_gene=fig|59843.19.peg.2951");&#39;>	no
B	Amino Acids and Derivatives	Branched-chain amino acids	Branched-Chain Amino Acid Biosynthesis	Threonine dehydratase, catabolic (EC 4.3.1.19)	<input type=&#39;button&#39; value=&#39;find&#39; onclick=&#39;window.open("?page=SearchGene&fr=Threonine dehydratase, catabolic (EC 4.3.1.19)&organism=59843.19&subsystem=Branched-Chain_Amino_Acid_Biosynthesis&template_gene=fig|6666666.640629.peg.1541");&#39;>	no	<a href=&#39;?page=Annotation&feature=fig|6666666.640629.peg.1541&#39; target=_blank>fig|6666666.640629.peg.1541</a>, <a href=&#39;?page=Annotation&feature=fig|6666666.640629.peg.4310&#39; target=_blank>fig|6666666.640629.peg.4310</a>	yes
B	Amino Acids and Derivatives	Branched-chain amino acids	HMG CoA Synthesis	Acetoacetyl-CoA synthetase (EC 6.2.1.16)	<input type=&#39;button&#39; value=&#39;find&#39; onclick=&#39;window.open("?page=SearchGene&fr=Acetoacetyl-CoA synthetase (EC 6.2.1.16)&organism=59843.19&subsystem=HMG_CoA_Synthesis&template_gene=fig|6666666.640629.peg.1105");&#39;>	no	<a href=&#39;?page=Annotation&feature=fig|6666666.640629.peg.1105&#39; target=_blank>fig|6666666.640629.peg.1105</a>	yes
B	Amino Acids and Derivatives	Branched-chain amino acids	HMG CoA Synthesis	Acetoacetyl-CoA synthetase [leucine] (EC 6.2.1.16)	<input type=&#39;button&#39; value=&#39;find&#39; onclick=&#39;window.open("?page=SearchGene&fr=Acetoacetyl-CoA synthetase [leucine] (EC 6.2.1.16)&organism=59843.19&subsystem=HMG_CoA_Synthesis&template_gene=fig|6666666.640629.peg.2396");&#39;>	no	<a href=&#39;?page=Annotation&feature=fig|6666666.640629.peg.2396&#39; target=_blank>fig|6666666.640629.peg.2396</a>	yes
B	Amino Acids and Derivatives	Branched-chain amino acids	HMG CoA Synthesis	Biotin carboxyl carrier protein of methylcrotonyl-CoA carboxylase	<input type=&#39;button&#39; value=&#39;find&#39; onclick=&#39;window.open("?page=SearchGene&fr=Biotin carboxyl carrier protein of methylcrotonyl-CoA carboxylase&organism=59843.19&subsystem=HMG_CoA_Synthesis&template_gene=fig|6666666.640629.peg.2398");&#39;>	no	<a href=&#39;?page=Annotation&feature=fig|6666666.640629.peg.2398&#39; target=_blank>fig|6666666.640629.peg.2398</a>	yes
B	Amino Acids and Derivatives	Branched-chain amino acids	HMG CoA Synthesis	Hydroxymethylglutaryl-CoA lyase (EC 4.1.3.4)	<input type=&#39;button&#39; value=&#39;find&#39; onclick=&#39;window.open("?page=SearchGene&fr=Hydroxymethylglutaryl-CoA lyase (EC 4.1.3.4)&organism=59843.19&subsystem=HMG_CoA_Synthesis&template_gene=fig|6666666.640629.peg.2399");&#39;>	no	<a href=&#39;?page=Annotation&feature=fig|6666666.640629.peg.2399&#39; target=_blank>fig|6666666.640629.peg.2399</a>	yes
B	Amino Acids and Derivatives	Branched-chain amino acids	HMG CoA Synthesis	Isovaleryl-CoA dehydrogenase (EC 1.3.8.4)	<input type=&#39;button&#39; value=&#39;find&#39; onclick=&#39;window.open("?page=SearchGene&fr=Isovaleryl-CoA dehydrogenase (EC 1.3.8.4)&organism=59843.19&subsystem=HMG_CoA_Synthesis&template_gene=fig|6666666.640629.peg.2395");&#39;>	no	<a href=&#39;?page=Annotation&feature=fig|6666666.640629.peg.2395&#39; target=_blank>fig|6666666.640629.peg.2395</a>	yes
B	Amino Acids and Derivatives	Branched-chain amino acids	HMG CoA Synthesis	Methylcrotonyl-CoA carboxylase carboxyl transferase subunit (EC 6.4.1.4)	<input type=&#39;button&#39; value=&#39;find&#39; onclick=&#39;window.open("?page=SearchGene&fr=Methylcrotonyl-CoA carboxylase carboxyl transferase subunit (EC 6.4.1.4)&organism=59843.19&subsystem=HMG_CoA_Synthesis&template_gene=fig|6666666.640629.peg.2401");&#39;>	no	<a href=&#39;?page=Annotation&feature=fig|6666666.640629.peg.2401&#39; target=_blank>fig|6666666.640629.peg.2401</a>	yes
B	Amino Acids and Derivatives	Branched-chain amino acids	HMG CoA Synthesis	Methylglutaconyl-CoA hydratase (EC 4.2.1.18)	<input type=&#39;button&#39; value=&#39;find&#39; onclick=&#39;window.open("?page=SearchGene&fr=Methylglutaconyl-CoA hydratase (EC 4.2.1.18)&organism=59843.19&subsystem=HMG_CoA_Synthesis&template_gene=fig|6666666.640629.peg.2400");&#39;>	no	<a href=&#39;?page=Annotation&feature=fig|6666666.640629.peg.2400&#39; target=_blank>fig|6666666.640629.peg.2400</a>	yes
B	Amino Acids and Derivatives	Branched-chain amino acids	Isoleucine degradation	Transcriptional regulator BkdR of isoleucine and valine catabolism operon	<input type=&#39;button&#39; value=&#39;find&#39; onclick=&#39;window.open("?page=SearchGene&fr=Transcriptional regulator BkdR of isoleucine and valine catabolism operon&organism=59843.19&subsystem=Isoleucine_degradation&template_gene=fig|6666666.640629.peg.389");&#39;>	no	<a href=&#39;?page=Annotation&feature=fig|6666666.640629.peg.389&#39; target=_blank>fig|6666666.640629.peg.389</a>	yes
B	Amino Acids and Derivatives	Branched-chain amino acids	Valine degradation	3-hydroxyisobutyrate dehydrogenase (EC 1.1.1.31)	<input type=&#39;button&#39; value=&#39;find&#39; onclick=&#39;window.open("?page=SearchGene&fr=3-hydroxyisobutyrate dehydrogenase (EC 1.1.1.31)&organism=59843.19&subsystem=Valine_degradation&template_gene=fig|6666666.640629.peg.3582");&#39;>	no	<a href=&#39;?page=Annotation&feature=fig|6666666.640629.peg.3582&#39; target=_blank>fig|6666666.640629.peg.3582</a>	yes
B	Amino Acids and Derivatives	Branched-chain amino acids	Valine degradation	3-hydroxyisobutyryl-CoA hydrolase (EC 3.1.2.4)	<input type=&#39;button&#39; value=&#39;find&#39; onclick=&#39;window.open("?page=SearchGene&fr=3-hydroxyisobutyryl-CoA hydrolase (EC 3.1.2.4)&organism=59843.19&subsystem=Valine_degradation&template_gene=fig|6666666.640629.peg.3585");&#39;>	no	<a href=&#39;?page=Annotation&feature=fig|6666666.640629.peg.3585&#39; target=_blank>fig|6666666.640629.peg.3585</a>	yes
B	Amino Acids and Derivatives	Branched-chain amino acids	Valine degradation	Methylmalonate-semialdehyde dehydrogenase (EC 1.2.1.27)	<input type=&#39;button&#39; value=&#39;find&#39; onclick=&#39;window.open("?page=SearchGene&fr=Methylmalonate-semialdehyde dehydrogenase (EC 1.2.1.27)&organism=59843.19&subsystem=Valine_degradation&template_gene=fig|6666666.640629.peg.3583");&#39;>	no	<a href=&#39;?page=Annotation&feature=fig|6666666.640629.peg.3583&#39; target=_blank>fig|6666666.640629.peg.3583</a>	yes
A and B	Amino Acids and Derivatives	Glutamine, glutamate, aspartate, asparagine; ammonia assimilation	Glutamate dehydrogenases	NADP-specific glutamate dehydrogenase (EC 1.4.1.4)	<a href=&#39;?page=Annotation&feature=fig|59843.19.peg.568&#39; target=_blank>fig|59843.19.peg.568</a>	yes	<a href=&#39;?page=Annotation&feature=fig|6666666.640629.peg.1566&#39; target=_blank>fig|6666666.640629.peg.1566</a>, <a href=&#39;?page=Annotation&feature=fig|6666666.640629.peg.3181&#39; target=_blank>fig|6666666.640629.peg.3181</a>	yes
A and B	Amino Acids and Derivatives	Glutamine, glutamate, aspartate, asparagine; ammonia assimilation	Glutamine, Glutamate, Aspartate and Asparagine Biosynthesis	Asparagine synthetase [glutamine-hydrolyzing] (EC 6.3.5.4) YisO	<a href=&#39;?page=Annotation&feature=fig|59843.19.peg.3400&#39; target=_blank>fig|59843.19.peg.3400</a>	yes	<a href=&#39;?page=Annotation&feature=fig|6666666.640629.peg.1443&#39; target=_blank>fig|6666666.640629.peg.1443</a>	yes
A and B	Amino Acids and Derivatives	Glutamine, glutamate, aspartate, asparagine; ammonia assimilation	Glutamine, Glutamate, Aspartate and Asparagine Biosynthesis	Aspartate aminotransferase (EC 2.6.1.1)	<a href=&#39;?page=Annotation&feature=fig|59843.19.peg.306&#39; target=_blank>fig|59843.19.peg.306</a>, <a href=&#39;?page=Annotation&feature=fig|59843.19.peg.308&#39; target=_blank>fig|59843.19.peg.308</a>, <a href=&#39;?page=Annotation&feature=fig|59843.19.peg.422&#39; target=_blank>fig|59843.19.peg.422</a>, <a href=&#39;?page=Annotation&feature=fig|59843.19.peg.640&#39; target=_blank>fig|59843…	yes	<a href=&#39;?page=Annotation&feature=fig|6666666.640629.peg.518&#39; target=_blank>fig|6666666.640629.peg.518</a>, <a href=&#39;?page=Annotation&feature=fig|6666666.640629.peg.1220&#39; target=_blank>fig|6666666.640629.peg.1220</a>, <a href=&#39;?page=Annotation&feature=fig|6666666.640629.peg.2473&#39; target=_blank>fig|6666666.640629.peg.2473</a>	yes
A and B	Amino Acids and Derivatives	Glutamine, glutamate, aspartate, asparagine; ammonia assimilation	Glutamine, Glutamate, Aspartate and Asparagine Biosynthesis	Aspartate racemase (EC 5.1.1.13)	<a href=&#39;?page=Annotation&feature=fig|59843.19.peg.885&#39; target=_blank>fig|59843.19.peg.885</a>	yes	<a href=&#39;?page=Annotation&feature=fig|6666666.640629.peg.4188&#39; target=_blank>fig|6666666.640629.peg.4188</a>	yes
A and B	Amino Acids and Derivatives	Glutamine, glutamate, aspartate, asparagine; ammonia assimilation	Glutamine, Glutamate, Aspartate and Asparagine Biosynthesis	Glutamate racemase (EC 5.1.1.3)	<a href=&#39;?page=Annotation&feature=fig|59843.19.peg.139&#39; target=_blank>fig|59843.19.peg.139</a>, <a href=&#39;?page=Annotation&feature=fig|59843.19.peg.277&#39; target=_blank>fig|59843.19.peg.277</a>	yes	<a href=&#39;?page=Annotation&feature=fig|6666666.640629.peg.138&#39; target=_blank>fig|6666666.640629.peg.138</a>, <a href=&#39;?page=Annotation&feature=fig|6666666.640629.peg.1162&#39; target=_blank>fig|6666666.640629.peg.1162</a>	yes
A and B	Amino Acids and Derivatives	Glutamine, glutamate, aspartate, asparagine; ammonia assimilation	Glutamine, Glutamate, Aspartate and Asparagine Biosynthesis	Glutamate synthase [NADPH] large chain (EC 1.4.1.13)	<a href=&#39;?page=Annotation&feature=fig|59843.19.peg.959&#39; target=_blank>fig|59843.19.peg.959</a>	yes	<a href=&#39;?page=Annotation&feature=fig|6666666.640629.peg.2741&#39; target=_blank>fig|6666666.640629.peg.2741</a>, <a href=&#39;?page=Annotation&feature=fig|6666666.640629.peg.4176&#39; target=_blank>fig|6666666.640629.peg.4176</a>	yes
A and B	Amino Acids and Derivatives	Glutamine, glutamate, aspartate, asparagine; ammonia assimilation	Glutamine, Glutamate, Aspartate and Asparagine Biosynthesis	Glutamate synthase [NADPH] small chain (EC 1.4.1.13)	<a href=&#39;?page=Annotation&feature=fig|59843.19.peg.4345&#39; target=_blank>fig|59843.19.peg.4345</a>	yes	<a href=&#39;?page=Annotation&feature=fig|6666666.640629.peg.4177&#39; target=_blank>fig|6666666.640629.peg.4177</a>	yes
A and B	Amino Acids and Derivatives	Glutamine, glutamate, aspartate, asparagine; ammonia assimilation	Glutamine, Glutamate, Aspartate and Asparagine Biosynthesis	Glutaminase (EC 3.5.1.2)	<a href=&#39;?page=Annotation&feature=fig|59843.19.peg.4610&#39; target=_blank>fig|59843.19.peg.4610</a>	yes	<a href=&#39;?page=Annotation&feature=fig|6666666.640629.peg.2273&#39; target=_blank>fig|6666666.640629.peg.2273</a>, <a href=&#39;?page=Annotation&feature=fig|6666666.640629.peg.3980&#39; target=_blank>fig|6666666.640629.peg.3980</a>	yes
A and B	Amino Acids and Derivatives	Glutamine, glutamate, aspartate, asparagine; ammonia assimilation	Glutamine, Glutamate, Aspartate and Asparagine Biosynthesis	Glutamine synthetase type I (EC 6.3.1.2)	<a href=&#39;?page=Annotation&feature=fig|59843.19.peg.655&#39; target=_blank>fig|59843.19.peg.655</a>, <a href=&#39;?page=Annotation&feature=fig|59843.19.peg.4298&#39; target=_blank>fig|59843.19.peg.4298</a>	yes	<a href=&#39;?page=Annotation&feature=fig|6666666.640629.peg.2166&#39; target=_blank>fig|6666666.640629.peg.2166</a>, <a href=&#39;?page=Annotation&feature=fig|6666666.640629.peg.3514&#39; target=_blank>fig|6666666.640629.peg.3514</a>	yes
A and B	Amino Acids and Derivatives	Glutamine, glutamate, aspartate, asparagine; ammonia assimilation	Glutamine, Glutamate, Aspartate and Asparagine Biosynthesis	L-asparaginase (EC 3.5.1.1)	<a href=&#39;?page=Annotation&feature=fig|59843.19.peg.2549&#39; target=_blank>fig|59843.19.peg.2549</a>	yes	<a href=&#39;?page=Annotation&feature=fig|6666666.640629.peg.2528&#39; target=_blank>fig|6666666.640629.peg.2528</a>, <a href=&#39;?page=Annotation&feature=fig|6666666.640629.peg.3550&#39; target=_blank>fig|6666666.640629.peg.3550</a>	yes
A and B	Amino Acids and Derivatives	Glutamine, glutamate, aspartate, asparagine; ammonia assimilation	Glutamine, Glutamate, Aspartate and Asparagine Biosynthesis	NADP-specific glutamate dehydrogenase (EC 1.4.1.4)	<a href=&#39;?page=Annotation&feature=fig|59843.19.peg.568&#39; target=_blank>fig|59843.19.peg.568</a>	yes	<a href=&#39;?page=Annotation&feature=fig|6666666.640629.peg.1566&#39; target=_blank>fig|6666666.640629.peg.1566</a>, <a href=&#39;?page=Annotation&feature=fig|6666666.640629.peg.3181&#39; target=_blank>fig|6666666.640629.peg.3181</a>	yes
A and B	Amino Acids and Derivatives	Glutamine, glutamate, aspartate, asparagine; ammonia assimilation	Glutamine synthetases	Glutamine synthetase type I (EC 6.3.1.2)	<a href=&#39;?page=Annotation&feature=fig|59843.19.peg.655&#39; target=_blank>fig|59843.19.peg.655</a>, <a href=&#39;?page=Annotation&feature=fig|59843.19.peg.4298&#39; target=_blank>fig|59843.19.peg.4298</a>	yes	<a href=&#39;?page=Annotation&feature=fig|6666666.640629.peg.2166&#39; target=_blank>fig|6666666.640629.peg.2166</a>, <a href=&#39;?page=Annotation&feature=fig|6666666.640629.peg.3514&#39; target=_blank>fig|6666666.640629.peg.3514</a>	yes
A	Amino Acids and Derivatives	Glutamine, glutamate, aspartate, asparagine; ammonia assimilation	Glutamine, Glutamate, Aspartate and Asparagine Biosynthesis	Asparagine synthetase [glutamine-hydrolyzing] (EC 6.3.5.4)	<a href=&#39;?page=Annotation&feature=fig|59843.19.peg.1204&#39; target=_blank>fig|59843.19.peg.1204</a>	yes	<input type=&#39;button&#39; class=&#39;button&#39; value=&#39;find&#39; onclick=&#39;window.open("?page=SearchGene&fr=Asparagine synthetase [glutamine-hydrolyzing] (EC 6.3.5.4)&organism=6666666.640629&subsystem=Glutamine,_Glutamate,_Aspartate_and_Asparagine_Biosynthesis&template_gene=fig|59843.19.peg.1204");&#39;>	no
A	Amino Acids and Derivatives	Glutamine, glutamate, aspartate, asparagine; ammonia assimilation	Glutamine, Glutamate, Aspartate and Asparagine Biosynthesis	Aspartate ammonia-lyase (EC 4.3.1.1)	<a href=&#39;?page=Annotation&feature=fig|59843.19.peg.436&#39; target=_blank>fig|59843.19.peg.436</a>, <a href=&#39;?page=Annotation&feature=fig|59843.19.peg.2506&#39; target=_blank>fig|59843.19.peg.2506</a>	yes	<input type=&#39;button&#39; class=&#39;button&#39; value=&#39;find&#39; onclick=&#39;window.open("?page=SearchGene&fr=Aspartate ammonia-lyase (EC 4.3.1.1)&organism=6666666.640629&subsystem=Glutamine,_Glutamate,_Aspartate_and_Asparagine_Biosynthesis&template_gene=fig|59843.19.peg.436");&#39;>	no
B	Amino Acids and Derivatives	Glutamine, glutamate, aspartate, asparagine; ammonia assimilation	Glutamate dehydrogenases	NAD-specific glutamate dehydrogenase (EC 1.4.1.2)	<input type=&#39;button&#39; value=&#39;find&#39; onclick=&#39;window.open("?page=SearchGene&fr=NAD-specific glutamate dehydrogenase (EC 1.4.1.2)&organism=59843.19&subsystem=Glutamate_dehydrogenases&template_gene=fig|6666666.640629.peg.1566");&#39;>	no	<a href=&#39;?page=Annotation&feature=fig|6666666.640629.peg.1566&#39; target=_blank>fig|6666666.640629.peg.1566</a>, <a href=&#39;?page=Annotation&feature=fig|6666666.640629.peg.2530&#39; target=_blank>fig|6666666.640629.peg.2530</a>, <a href=&#39;?page=Annotation&feature=fig|6666666.640629.peg.3181&#39; target=_blank>fig|6666666.640629.peg.3181</a>	yes
B	Amino Acids and Derivatives	Glutamine, glutamate, aspartate, asparagine; ammonia assimilation	Glutamine, Glutamate, Aspartate and Asparagine Biosynthesis	Asparagine synthetase [glutamine-hydrolyzing] (EC 6.3.5.4) AsnB	<input type=&#39;button&#39; value=&#39;find&#39; onclick=&#39;window.open("?page=SearchGene&fr=Asparagine synthetase [glutamine-hydrolyzing] (EC 6.3.5.4) AsnB&organism=59843.19&subsystem=Glutamine,_Glutamate,_Aspartate_and_Asparagine_Biosynthesis&template_gene=fig|6666666.640629.peg.4348");&#39;>	no	<a href=&#39;?page=Annotation&feature=fig|6666666.640629.peg.4348&#39; target=_blank>fig|6666666.640629.peg.4348</a>	yes
B	Amino Acids and Derivatives	Glutamine, glutamate, aspartate, asparagine; ammonia assimilation	Poly-gamma-glutamate biosynthesis	Poly-gamma-glutamate synthase subunit PgsA/CapA (EC 6.3.2.-)	<input type=&#39;button&#39; value=&#39;find&#39; onclick=&#39;window.open("?page=SearchGene&fr=Poly-gamma-glutamate synthase subunit PgsA/CapA (EC 6.3.2.-)&organism=59843.19&subsystem=Poly-gamma-glutamate_biosynthesis&template_gene=fig|6666666.640629.peg.1842");&#39;>	no	<a href=&#39;?page=Annotation&feature=fig|6666666.640629.peg.1842&#39; target=_blank>fig|6666666.640629.peg.1842</a>	yes
B	Amino Acids and Derivatives	Glutamine, glutamate, aspartate, asparagine; ammonia assimilation	Poly-gamma-glutamate biosynthesis	Poly-gamma-glutamate synthase subunit PgsB/CapB (EC 6.3.2.-)	<input type=&#39;button&#39; value=&#39;find&#39; onclick=&#39;window.open("?page=SearchGene&fr=Poly-gamma-glutamate synthase subunit PgsB/CapB (EC 6.3.2.-)&organism=59843.19&subsystem=Poly-gamma-glutamate_biosynthesis&template_gene=fig|6666666.640629.peg.1844");&#39;>	no	<a href=&#39;?page=Annotation&feature=fig|6666666.640629.peg.1844&#39; target=_blank>fig|6666666.640629.peg.1844</a>, <a href=&#39;?page=Annotation&feature=fig|6666666.640629.peg.1845&#39; target=_blank>fig|6666666.640629.peg.1845</a>	yes
B	Amino Acids and Derivatives	Glutamine, glutamate, aspartate, asparagine; ammonia assimilation	Poly-gamma-glutamate biosynthesis	Poly-gamma-glutamate synthase subunit PgsC/CapC (EC 6.3.2.-)	<input type=&#39;button&#39; value=&#39;find&#39; onclick=&#39;window.open("?page=SearchGene&fr=Poly-gamma-glutamate synthase subunit PgsC/CapC (EC 6.3.2.-)&organism=59843.19&subsystem=Poly-gamma-glutamate_biosynthesis&template_gene=fig|6666666.640629.peg.1843");&#39;>	no	<a href=&#39;?page=Annotation&feature=fig|6666666.640629.peg.1843&#39; target=_blank>fig|6666666.640629.peg.1843</a>	yes
A and B	Amino Acids and Derivatives	Histidine Metabolism	Histidine Biosynthesis	ATP phosphoribosyltransferase regulatory subunit (EC 2.4.2.17)	<a href=&#39;?page=Annotation&feature=fig|59843.19.peg.2125&#39; target=_blank>fig|59843.19.peg.2125</a>	yes	<a href=&#39;?page=Annotation&feature=fig|6666666.640629.peg.871&#39; target=_blank>fig|6666666.640629.peg.871</a>	yes
A and B	Amino Acids and Derivatives	Histidine Metabolism	Histidine Biosynthesis	Histidinol dehydrogenase (EC 1.1.1.23)	<a href=&#39;?page=Annotation&feature=fig|59843.19.peg.2127&#39; target=_blank>fig|59843.19.peg.2127</a>	yes	<a href=&#39;?page=Annotation&feature=fig|6666666.640629.peg.869&#39; target=_blank>fig|6666666.640629.peg.869</a>, <a href=&#39;?page=Annotation&feature=fig|6666666.640629.peg.2725&#39; target=_blank>fig|6666666.640629.peg.2725</a>	yes
A and B	Amino Acids and Derivatives	Histidine Metabolism	Histidine Biosynthesis	Histidinol-phosphatase (EC 3.1.3.15)	<a href=&#39;?page=Annotation&feature=fig|59843.19.peg.1034&#39; target=_blank>fig|59843.19.peg.1034</a>, <a href=&#39;?page=Annotation&feature=fig|59843.19.peg.2133&#39; target=_blank>fig|59843.19.peg.2133</a>, <a href=&#39;?page=Annotation&feature=fig|59843.19.peg.5199&#39; target=_blank>fig|59843.19.peg.5199</a>	yes	<a href=&#39;?page=Annotation&feature=fig|6666666.640629.peg.45&#39; target=_blank>fig|6666666.640629.peg.45</a>, <a href=&#39;?page=Annotation&feature=fig|6666666.640629.peg.2882&#39; target=_blank>fig|6666666.640629.peg.2882</a>	yes
A and B	Amino Acids and Derivatives	Histidine Metabolism	Histidine Biosynthesis	Histidinol-phosphate aminotransferase (EC 2.6.1.9)	<a href=&#39;?page=Annotation&feature=fig|59843.19.peg.4148&#39; target=_blank>fig|59843.19.peg.4148</a>	yes	<a href=&#39;?page=Annotation&feature=fig|6666666.640629.peg.2500&#39; target=_blank>fig|6666666.640629.peg.2500</a>	yes
A and B	Amino Acids and Derivatives	Histidine Metabolism	Histidine Biosynthesis	Imidazoleglycerol-phosphate dehydratase (EC 4.2.1.19)	<a href=&#39;?page=Annotation&feature=fig|59843.19.peg.2128&#39; target=_blank>fig|59843.19.peg.2128</a>	yes	<a href=&#39;?page=Annotation&feature=fig|6666666.640629.peg.868&#39; target=_blank>fig|6666666.640629.peg.868</a>	yes
A and B	Amino Acids and Derivatives	Histidine Metabolism	Histidine Biosynthesis	Phosphoribosyl-AMP cyclohydrolase (EC 3.5.4.19)	<a href=&#39;?page=Annotation&feature=fig|59843.19.peg.2132&#39; target=_blank>fig|59843.19.peg.2132</a>	yes	<a href=&#39;?page=Annotation&feature=fig|6666666.640629.peg.864&#39; target=_blank>fig|6666666.640629.peg.864</a>	yes
A and B	Amino Acids and Derivatives	Histidine Metabolism	Histidine Biosynthesis	Phosphoribosyl-ATP pyrophosphatase (EC 3.6.1.31)	<a href=&#39;?page=Annotation&feature=fig|59843.19.peg.2132&#39; target=_blank>fig|59843.19.peg.2132</a>	yes	<a href=&#39;?page=Annotation&feature=fig|6666666.640629.peg.864&#39; target=_blank>fig|6666666.640629.peg.864</a>	yes
A and B	Amino Acids and Derivatives	Histidine Metabolism	Histidine Biosynthesis	Phosphoribosylformimino-5-aminoimidazole carboxamide ribotide isomerase (EC 5.3.1.16)	<a href=&#39;?page=Annotation&feature=fig|59843.19.peg.2130&#39; target=_blank>fig|59843.19.peg.2130</a>	yes	<a href=&#39;?page=Annotation&feature=fig|6666666.640629.peg.866&#39; target=_blank>fig|6666666.640629.peg.866</a>	yes
B	Amino Acids and Derivatives	Histidine Metabolism	Histidine Degradation	Formiminoglutamase (EC 3.5.3.8)	<input type=&#39;button&#39; value=&#39;find&#39; onclick=&#39;window.open("?page=SearchGene&fr=Formiminoglutamase (EC 3.5.3.8)&organism=59843.19&subsystem=Histidine_Degradation&template_gene=fig|6666666.640629.peg.3088");&#39;>	no	<a href=&#39;?page=Annotation&feature=fig|6666666.640629.peg.3088&#39; target=_blank>fig|6666666.640629.peg.3088</a>	yes
B	Amino Acids and Derivatives	Histidine Metabolism	Histidine Degradation	Histidine ammonia-lyase (EC 4.3.1.3)	<input type=&#39;button&#39; value=&#39;find&#39; onclick=&#39;window.open("?page=SearchGene&fr=Histidine ammonia-lyase (EC 4.3.1.3)&organism=59843.19&subsystem=Histidine_Degradation&template_gene=fig|6666666.640629.peg.3085");&#39;>	no	<a href=&#39;?page=Annotation&feature=fig|6666666.640629.peg.3085&#39; target=_blank>fig|6666666.640629.peg.3085</a>	yes
B	Amino Acids and Derivatives	Histidine Metabolism	Histidine Degradation	Hut operon positive regulatory protein	<input type=&#39;button&#39; value=&#39;find&#39; onclick=&#39;window.open("?page=SearchGene&fr=Hut operon positive regulatory protein&organism=59843.19&subsystem=Histidine_Degradation&template_gene=fig|6666666.640629.peg.3084");&#39;>	no	<a href=&#39;?page=Annotation&feature=fig|6666666.640629.peg.3084&#39; target=_blank>fig|6666666.640629.peg.3084</a>	yes
B	Amino Acids and Derivatives	Histidine Metabolism	Histidine Degradation	Imidazolonepropionase (EC 3.5.2.7)	<input type=&#39;button&#39; value=&#39;find&#39; onclick=&#39;window.open("?page=SearchGene&fr=Imidazolonepropionase (EC 3.5.2.7)&organism=59843.19&subsystem=Histidine_Degradation&template_gene=fig|6666666.640629.peg.3087");&#39;>	no	<a href=&#39;?page=Annotation&feature=fig|6666666.640629.peg.3087&#39; target=_blank>fig|6666666.640629.peg.3087</a>	yes
B	Amino Acids and Derivatives	Histidine Metabolism	Histidine Degradation	Urocanate hydratase (EC 4.2.1.49)	<input type=&#39;button&#39; value=&#39;find&#39; onclick=&#39;window.open("?page=SearchGene&fr=Urocanate hydratase (EC 4.2.1.49)&organism=59843.19&subsystem=Histidine_Degradation&template_gene=fig|6666666.640629.peg.3086");&#39;>	no	<a href=&#39;?page=Annotation&feature=fig|6666666.640629.peg.3086&#39; target=_blank>fig|6666666.640629.peg.3086</a>	yes
A and B	Amino Acids and Derivatives	Lysine, threonine, methionine, and cysteine	Cysteine Biosynthesis	Cysteine synthase (EC 2.5.1.47)	<a href=&#39;?page=Annotation&feature=fig|59843.19.peg.1699&#39; target=_blank>fig|59843.19.peg.1699</a>, <a href=&#39;?page=Annotation&feature=fig|59843.19.peg.2047&#39; target=_blank>fig|59843.19.peg.2047</a>	yes	<a href=&#39;?page=Annotation&feature=fig|6666666.640629.peg.3822&#39; target=_blank>fig|6666666.640629.peg.3822</a>, <a href=&#39;?page=Annotation&feature=fig|6666666.640629.peg.3860&#39; target=_blank>fig|6666666.640629.peg.3860</a>	yes
A and B	Amino Acids and Derivatives	Lysine, threonine, methionine, and cysteine	Cysteine Biosynthesis	Phosphoadenylyl-sulfate reductase [thioredoxin] (EC 1.8.4.8)	<a href=&#39;?page=Annotation&feature=fig|59843.19.peg.1352&#39; target=_blank>fig|59843.19.peg.1352</a>	yes	<a href=&#39;?page=Annotation&feature=fig|6666666.640629.peg.2376&#39; target=_blank>fig|6666666.640629.peg.2376</a>	yes
A and B	Amino Acids and Derivatives	Lysine, threonine, methionine, and cysteine	Cysteine Biosynthesis	Serine acetyltransferase (EC 2.3.1.30)	<a href=&#39;?page=Annotation&feature=fig|59843.19.peg.1409&#39; target=_blank>fig|59843.19.peg.1409</a>	yes	<a href=&#39;?page=Annotation&feature=fig|6666666.640629.peg.4164&#39; target=_blank>fig|6666666.640629.peg.4164</a>	yes
A and B	Amino Acids and Derivatives	Lysine, threonine, methionine, and cysteine	Cysteine Biosynthesis	Sulfate permease	<a href=&#39;?page=Annotation&feature=fig|59843.19.peg.3317&#39; target=_blank>fig|59843.19.peg.3317</a>	yes	<a href=&#39;?page=Annotation&feature=fig|6666666.640629.peg.1341&#39; target=_blank>fig|6666666.640629.peg.1341</a>	yes
A and B	Amino Acids and Derivatives	Lysine, threonine, methionine, and cysteine	Cysteine Biosynthesis	Sulfite reductase [NADPH] flavoprotein alpha-component (EC 1.8.1.2)	<a href=&#39;?page=Annotation&feature=fig|59843.19.peg.4950&#39; target=_blank>fig|59843.19.peg.4950</a>	yes	<a href=&#39;?page=Annotation&feature=fig|6666666.640629.peg.2383&#39; target=_blank>fig|6666666.640629.peg.2383</a>	yes
A and B	Amino Acids and Derivatives	Lysine, threonine, methionine, and cysteine	Cysteine Biosynthesis	Sulfite reductase [NADPH] hemoprotein beta-component (EC 1.8.1.2)	<a href=&#39;?page=Annotation&feature=fig|59843.19.peg.4949&#39; target=_blank>fig|59843.19.peg.4949</a>	yes	<a href=&#39;?page=Annotation&feature=fig|6666666.640629.peg.2384&#39; target=_blank>fig|6666666.640629.peg.2384</a>	yes
A and B	Amino Acids and Derivatives	Lysine, threonine, methionine, and cysteine	Lysine Biosynthesis DAP Pathway	4-hydroxy-tetrahydrodipicolinate reductase (EC 1.17.1.8)	<a href=&#39;?page=Annotation&feature=fig|59843.19.peg.4166&#39; target=_blank>fig|59843.19.peg.4166</a>	yes	<a href=&#39;?page=Annotation&feature=fig|6666666.640629.peg.2484&#39; target=_blank>fig|6666666.640629.peg.2484</a>	yes
A and B	Amino Acids and Derivatives	Lysine, threonine, methionine, and cysteine	Lysine Biosynthesis DAP Pathway	4-hydroxy-tetrahydrodipicolinate synthase (EC 4.3.3.7)	<a href=&#39;?page=Annotation&feature=fig|59843.19.peg.4935&#39; target=_blank>fig|59843.19.peg.4935</a>, <a href=&#39;?page=Annotation&feature=fig|59843.19.peg.5401&#39; target=_blank>fig|59843.19.peg.5401</a>	yes	<a href=&#39;?page=Annotation&feature=fig|6666666.640629.peg.2773&#39; target=_blank>fig|6666666.640629.peg.2773</a>, <a href=&#39;?page=Annotation&feature=fig|6666666.640629.peg.3479&#39; target=_blank>fig|6666666.640629.peg.3479</a>	yes
A and B	Amino Acids and Derivatives	Lysine, threonine, methionine, and cysteine	Lysine Biosynthesis DAP Pathway	Aspartate-semialdehyde dehydrogenase (EC 1.2.1.11)	<a href=&#39;?page=Annotation&feature=fig|59843.19.peg.4646&#39; target=_blank>fig|59843.19.peg.4646</a>, <a href=&#39;?page=Annotation&feature=fig|59843.19.peg.5403&#39; target=_blank>fig|59843.19.peg.5403</a>	yes	<a href=&#39;?page=Annotation&feature=fig|6666666.640629.peg.3477&#39; target=_blank>fig|6666666.640629.peg.3477</a>	yes
A and B	Amino Acids and Derivatives	Lysine, threonine, methionine, and cysteine	Lysine Biosynthesis DAP Pathway	Aspartokinase (EC 2.7.2.4)	<a href=&#39;?page=Annotation&feature=fig|59843.19.peg.4021&#39; target=_blank>fig|59843.19.peg.4021</a>, <a href=&#39;?page=Annotation&feature=fig|59843.19.peg.5402&#39; target=_blank>fig|59843.19.peg.5402</a>	yes	<a href=&#39;?page=Annotation&feature=fig|6666666.640629.peg.385&#39; target=_blank>fig|6666666.640629.peg.385</a>, <a href=&#39;?page=Annotation&feature=fig|6666666.640629.peg.2843&#39; target=_blank>fig|6666666.640629.peg.2843</a>, <a href=&#39;?page=Annotation&feature=fig|6666666.640629.peg.3478&#39; target=_blank>fig|6666666.640629.peg.3478</a>	yes
A and B	Amino Acids and Derivatives	Lysine, threonine, methionine, and cysteine	Lysine Biosynthesis DAP Pathway	Diaminopimelate decarboxylase (EC 4.1.1.20)	<a href=&#39;?page=Annotation&feature=fig|59843.19.peg.4080&#39; target=_blank>fig|59843.19.peg.4080</a>	yes	<a href=&#39;?page=Annotation&feature=fig|6666666.640629.peg.1572&#39; target=_blank>fig|6666666.640629.peg.1572</a>, <a href=&#39;?page=Annotation&feature=fig|6666666.640629.peg.1573&#39; target=_blank>fig|6666666.640629.peg.1573</a>, <a href=&#39;?page=Annotation&feature=fig|6666666.640629.peg.2565&#39; target=_blank>fig|6666666.640629.peg.2565</a>	yes
A and B	Amino Acids and Derivatives	Lysine, threonine, methionine, and cysteine	Lysine Biosynthesis DAP Pathway	Diaminopimelate epimerase (EC 5.1.1.7)	<a href=&#39;?page=Annotation&feature=fig|59843.19.peg.3875&#39; target=_blank>fig|59843.19.peg.3875</a>	yes	<a href=&#39;?page=Annotation&feature=fig|6666666.640629.peg.2075&#39; target=_blank>fig|6666666.640629.peg.2075</a>	yes
A and B	Amino Acids and Derivatives	Lysine, threonine, methionine, and cysteine	Lysine Biosynthesis DAP Pathway, GJO scratch	4-hydroxy-tetrahydrodipicolinate reductase (EC 1.17.1.8)	<a href=&#39;?page=Annotation&feature=fig|59843.19.peg.4166&#39; target=_blank>fig|59843.19.peg.4166</a>	yes	<a href=&#39;?page=Annotation&feature=fig|6666666.640629.peg.2484&#39; target=_blank>fig|6666666.640629.peg.2484</a>	yes
A and B	Amino Acids and Derivatives	Lysine, threonine, methionine, and cysteine	Lysine Biosynthesis DAP Pathway, GJO scratch	4-hydroxy-tetrahydrodipicolinate synthase (EC 4.3.3.7)	<a href=&#39;?page=Annotation&feature=fig|59843.19.peg.4935&#39; target=_blank>fig|59843.19.peg.4935</a>, <a href=&#39;?page=Annotation&feature=fig|59843.19.peg.5401&#39; target=_blank>fig|59843.19.peg.5401</a>	yes	<a href=&#39;?page=Annotation&feature=fig|6666666.640629.peg.2773&#39; target=_blank>fig|6666666.640629.peg.2773</a>, <a href=&#39;?page=Annotation&feature=fig|6666666.640629.peg.3479&#39; target=_blank>fig|6666666.640629.peg.3479</a>	yes
A and B	Amino Acids and Derivatives	Lysine, threonine, methionine, and cysteine	Lysine Biosynthesis DAP Pathway, GJO scratch	Aspartate-semialdehyde dehydrogenase (EC 1.2.1.11)	<a href=&#39;?page=Annotation&feature=fig|59843.19.peg.4646&#39; target=_blank>fig|59843.19.peg.4646</a>, <a href=&#39;?page=Annotation&feature=fig|59843.19.peg.5403&#39; target=_blank>fig|59843.19.peg.5403</a>	yes	<a href=&#39;?page=Annotation&feature=fig|6666666.640629.peg.3477&#39; target=_blank>fig|6666666.640629.peg.3477</a>	yes
A and B	Amino Acids and Derivatives	Lysine, threonine, methionine, and cysteine	Lysine Biosynthesis DAP Pathway, GJO scratch	Aspartokinase (EC 2.7.2.4)	<a href=&#39;?page=Annotation&feature=fig|59843.19.peg.4021&#39; target=_blank>fig|59843.19.peg.4021</a>, <a href=&#39;?page=Annotation&feature=fig|59843.19.peg.5402&#39; target=_blank>fig|59843.19.peg.5402</a>	yes	<a href=&#39;?page=Annotation&feature=fig|6666666.640629.peg.385&#39; target=_blank>fig|6666666.640629.peg.385</a>, <a href=&#39;?page=Annotation&feature=fig|6666666.640629.peg.2843&#39; target=_blank>fig|6666666.640629.peg.2843</a>, <a href=&#39;?page=Annotation&feature=fig|6666666.640629.peg.3478&#39; target=_blank>fig|6666666.640629.peg.3478</a>	yes
A and B	Amino Acids and Derivatives	Lysine, threonine, methionine, and cysteine	Lysine Biosynthesis DAP Pathway, GJO scratch	Diaminopimelate decarboxylase (EC 4.1.1.20)	<a href=&#39;?page=Annotation&feature=fig|59843.19.peg.4080&#39; target=_blank>fig|59843.19.peg.4080</a>	yes	<a href=&#39;?page=Annotation&feature=fig|6666666.640629.peg.1572&#39; target=_blank>fig|6666666.640629.peg.1572</a>, <a href=&#39;?page=Annotation&feature=fig|6666666.640629.peg.1573&#39; target=_blank>fig|6666666.640629.peg.1573</a>, <a href=&#39;?page=Annotation&feature=fig|6666666.640629.peg.2565&#39; target=_blank>fig|6666666.640629.peg.2565</a>	yes
A and B	Amino Acids and Derivatives	Lysine, threonine, methionine, and cysteine	Lysine Biosynthesis DAP Pathway, GJO scratch	Diaminopimelate epimerase (EC 5.1.1.7)	<a href=&#39;?page=Annotation&feature=fig|59843.19.peg.3875&#39; target=_blank>fig|59843.19.peg.3875</a>	yes	<a href=&#39;?page=Annotation&feature=fig|6666666.640629.peg.2075&#39; target=_blank>fig|6666666.640629.peg.2075</a>	yes
A and B	Amino Acids and Derivatives	Lysine, threonine, methionine, and cysteine	Methionine Biosynthesis	5,10-methylenetetrahydrofolate reductase (EC 1.5.1.20)	<a href=&#39;?page=Annotation&feature=fig|59843.19.peg.3876&#39; target=_blank>fig|59843.19.peg.3876</a>	yes	<a href=&#39;?page=Annotation&feature=fig|6666666.640629.peg.3974&#39; target=_blank>fig|6666666.640629.peg.3974</a>	yes
A and B	Amino Acids and Derivatives	Lysine, threonine, methionine, and cysteine	Methionine Biosynthesis	5-methyltetrahydrofolate--homocysteine methyltransferase (EC 2.1.1.13)	<a href=&#39;?page=Annotation&feature=fig|59843.19.peg.4309&#39; target=_blank>fig|59843.19.peg.4309</a>	yes	<a href=&#39;?page=Annotation&feature=fig|6666666.640629.peg.3973&#39; target=_blank>fig|6666666.640629.peg.3973</a>	yes
A and B	Amino Acids and Derivatives	Lysine, threonine, methionine, and cysteine	Methionine Biosynthesis	5-methyltetrahydropteroyltriglutamate--homocysteine methyltransferase (EC 2.1.1.14)	<a href=&#39;?page=Annotation&feature=fig|59843.19.peg.3015&#39; target=_blank>fig|59843.19.peg.3015</a>, <a href=&#39;?page=Annotation&feature=fig|59843.19.peg.4585&#39; target=_blank>fig|59843.19.peg.4585</a>, <a href=&#39;?page=Annotation&feature=fig|59843.19.peg.4920&#39; target=_blank>fig|59843.19.peg.4920</a>	yes	<a href=&#39;?page=Annotation&feature=fig|6666666.640629.peg.1284&#39; target=_blank>fig|6666666.640629.peg.1284</a>	yes
A and B	Amino Acids and Derivatives	Lysine, threonine, methionine, and cysteine	Methionine Biosynthesis	Cystathionine beta-lyase (EC 4.4.1.8)	<a href=&#39;?page=Annotation&feature=fig|59843.19.peg.675&#39; target=_blank>fig|59843.19.peg.675</a>, <a href=&#39;?page=Annotation&feature=fig|59843.19.peg.3308&#39; target=_blank>fig|59843.19.peg.3308</a>	yes	<a href=&#39;?page=Annotation&feature=fig|6666666.640629.peg.713&#39; target=_blank>fig|6666666.640629.peg.713</a>, <a href=&#39;?page=Annotation&feature=fig|6666666.640629.peg.3975&#39; target=_blank>fig|6666666.640629.peg.3975</a>	yes
A and B	Amino Acids and Derivatives	Lysine, threonine, methionine, and cysteine	Methionine Biosynthesis	Cystathionine gamma-synthase (EC 2.5.1.48)	<a href=&#39;?page=Annotation&feature=fig|59843.19.peg.676&#39; target=_blank>fig|59843.19.peg.676</a>	yes	<a href=&#39;?page=Annotation&feature=fig|6666666.640629.peg.3976&#39; target=_blank>fig|6666666.640629.peg.3976</a>, <a href=&#39;?page=Annotation&feature=fig|6666666.640629.peg.4322&#39; target=_blank>fig|6666666.640629.peg.4322</a>	yes
A and B	Amino Acids and Derivatives	Lysine, threonine, methionine, and cysteine	Methionine Biosynthesis	Cysteine synthase (EC 2.5.1.47)	<a href=&#39;?page=Annotation&feature=fig|59843.19.peg.1699&#39; target=_blank>fig|59843.19.peg.1699</a>, <a href=&#39;?page=Annotation&feature=fig|59843.19.peg.2047&#39; target=_blank>fig|59843.19.peg.2047</a>	yes	<a href=&#39;?page=Annotation&feature=fig|6666666.640629.peg.3822&#39; target=_blank>fig|6666666.640629.peg.3822</a>, <a href=&#39;?page=Annotation&feature=fig|6666666.640629.peg.3860&#39; target=_blank>fig|6666666.640629.peg.3860</a>	yes
A and B	Amino Acids and Derivatives	Lysine, threonine, methionine, and cysteine	Methionine Biosynthesis	Homoserine dehydrogenase (EC 1.1.1.3)	<a href=&#39;?page=Annotation&feature=fig|59843.19.peg.3456&#39; target=_blank>fig|59843.19.peg.3456</a>	yes	<a href=&#39;?page=Annotation&feature=fig|6666666.640629.peg.3119&#39; target=_blank>fig|6666666.640629.peg.3119</a>, <a href=&#39;?page=Annotation&feature=fig|6666666.640629.peg.4324&#39; target=_blank>fig|6666666.640629.peg.4324</a>	yes
A and B	Amino Acids and Derivatives	Lysine, threonine, methionine, and cysteine	Methionine Biosynthesis	Homoserine kinase (EC 2.7.1.39)	<a href=&#39;?page=Annotation&feature=fig|59843.19.peg.2342&#39; target=_blank>fig|59843.19.peg.2342</a>, <a href=&#39;?page=Annotation&feature=fig|59843.19.peg.3458&#39; target=_blank>fig|59843.19.peg.3458</a>, <a href=&#39;?page=Annotation&feature=fig|59843.19.peg.4190&#39; target=_blank>fig|59843.19.peg.4190</a>, <a href=&#39;?page=Annotation&feature=fig|59843.19.peg.4654&#39; target=_blank>fi…	yes	<a href=&#39;?page=Annotation&feature=fig|6666666.640629.peg.3117&#39; target=_blank>fig|6666666.640629.peg.3117</a>	yes
A and B	Amino Acids and Derivatives	Lysine, threonine, methionine, and cysteine	Methionine Biosynthesis	Methionine ABC transporter ATP-binding protein	<a href=&#39;?page=Annotation&feature=fig|59843.19.peg.1073&#39; target=_blank>fig|59843.19.peg.1073</a>, <a href=&#39;?page=Annotation&feature=fig|59843.19.peg.2822&#39; target=_blank>fig|59843.19.peg.2822</a>, <a href=&#39;?page=Annotation&feature=fig|59843.19.peg.3250&#39; target=_blank>fig|59843.19.peg.3250</a>	yes	<a href=&#39;?page=Annotation&feature=fig|6666666.640629.peg.755&#39; target=_blank>fig|6666666.640629.peg.755</a>, <a href=&#39;?page=Annotation&feature=fig|6666666.640629.peg.4221&#39; target=_blank>fig|6666666.640629.peg.4221</a>	yes
A and B	Amino Acids and Derivatives	Lysine, threonine, methionine, and cysteine	Methionine Biosynthesis	Methionine ABC transporter permease protein	<a href=&#39;?page=Annotation&feature=fig|59843.19.peg.1072&#39; target=_blank>fig|59843.19.peg.1072</a>, <a href=&#39;?page=Annotation&feature=fig|59843.19.peg.3251&#39; target=_blank>fig|59843.19.peg.3251</a>	yes	<a href=&#39;?page=Annotation&feature=fig|6666666.640629.peg.754&#39; target=_blank>fig|6666666.640629.peg.754</a>, <a href=&#39;?page=Annotation&feature=fig|6666666.640629.peg.4222&#39; target=_blank>fig|6666666.640629.peg.4222</a>	yes
A and B	Amino Acids and Derivatives	Lysine, threonine, methionine, and cysteine	Methionine Biosynthesis	Methionine ABC transporter substrate-binding protein	<a href=&#39;?page=Annotation&feature=fig|59843.19.peg.1071&#39; target=_blank>fig|59843.19.peg.1071</a>, <a href=&#39;?page=Annotation&feature=fig|59843.19.peg.3252&#39; target=_blank>fig|59843.19.peg.3252</a>	yes	<a href=&#39;?page=Annotation&feature=fig|6666666.640629.peg.753&#39; target=_blank>fig|6666666.640629.peg.753</a>, <a href=&#39;?page=Annotation&feature=fig|6666666.640629.peg.4223&#39; target=_blank>fig|6666666.640629.peg.4223</a>	yes
A and B	Amino Acids and Derivatives	Lysine, threonine, methionine, and cysteine	Methionine Biosynthesis	O-acetylhomoserine sulfhydrylase (EC 2.5.1.49)	<a href=&#39;?page=Annotation&feature=fig|59843.19.peg.1209&#39; target=_blank>fig|59843.19.peg.1209</a>	yes	<a href=&#39;?page=Annotation&feature=fig|6666666.640629.peg.3784&#39; target=_blank>fig|6666666.640629.peg.3784</a>, <a href=&#39;?page=Annotation&feature=fig|6666666.640629.peg.3786&#39; target=_blank>fig|6666666.640629.peg.3786</a>, <a href=&#39;?page=Annotation&feature=fig|6666666.640629.peg.3841&#39; target=_blank>fig|6666666.640629.peg.3841</a>	yes
A and B	Amino Acids and Derivatives	Lysine, threonine, methionine, and cysteine	Methionine Biosynthesis	O-succinylhomoserine sulfhydrylase (EC 2.5.1.48)	<a href=&#39;?page=Annotation&feature=fig|59843.19.peg.1209&#39; target=_blank>fig|59843.19.peg.1209</a>	yes	<a href=&#39;?page=Annotation&feature=fig|6666666.640629.peg.3784&#39; target=_blank>fig|6666666.640629.peg.3784</a>, <a href=&#39;?page=Annotation&feature=fig|6666666.640629.peg.3786&#39; target=_blank>fig|6666666.640629.peg.3786</a>, <a href=&#39;?page=Annotation&feature=fig|6666666.640629.peg.3841&#39; target=_blank>fig|6666666.640629.peg.3841</a>	yes
A and B	Amino Acids and Derivatives	Lysine, threonine, methionine, and cysteine	Methionine Biosynthesis	S-adenosylhomocysteine nucleosidase (EC 3.2.2.9)	<a href=&#39;?page=Annotation&feature=fig|59843.19.peg.3848&#39; target=_blank>fig|59843.19.peg.3848</a>	yes	<a href=&#39;?page=Annotation&feature=fig|6666666.640629.peg.236&#39; target=_blank>fig|6666666.640629.peg.236</a>, <a href=&#39;?page=Annotation&feature=fig|6666666.640629.peg.1241&#39; target=_blank>fig|6666666.640629.peg.1241</a>, <a href=&#39;?page=Annotation&feature=fig|6666666.640629.peg.1973&#39; target=_blank>fig|6666666.640629.peg.1973</a>	yes
A and B	Amino Acids and Derivatives	Lysine, threonine, methionine, and cysteine	Methionine Biosynthesis	S-adenosylmethionine synthetase (EC 2.5.1.6)	<a href=&#39;?page=Annotation&feature=fig|59843.19.peg.1535&#39; target=_blank>fig|59843.19.peg.1535</a>	yes	<a href=&#39;?page=Annotation&feature=fig|6666666.640629.peg.683&#39; target=_blank>fig|6666666.640629.peg.683</a>	yes
A and B	Amino Acids and Derivatives	Lysine, threonine, methionine, and cysteine	Methionine Biosynthesis	Serine acetyltransferase (EC 2.3.1.30)	<a href=&#39;?page=Annotation&feature=fig|59843.19.peg.1409&#39; target=_blank>fig|59843.19.peg.1409</a>	yes	<a href=&#39;?page=Annotation&feature=fig|6666666.640629.peg.4164&#39; target=_blank>fig|6666666.640629.peg.4164</a>	yes
A and B	Amino Acids and Derivatives	Lysine, threonine, methionine, and cysteine	Methionine Degradation	Methionine ABC transporter ATP-binding protein	<a href=&#39;?page=Annotation&feature=fig|59843.19.peg.1073&#39; target=_blank>fig|59843.19.peg.1073</a>, <a href=&#39;?page=Annotation&feature=fig|59843.19.peg.2822&#39; target=_blank>fig|59843.19.peg.2822</a>, <a href=&#39;?page=Annotation&feature=fig|59843.19.peg.3250&#39; target=_blank>fig|59843.19.peg.3250</a>	yes	<a href=&#39;?page=Annotation&feature=fig|6666666.640629.peg.755&#39; target=_blank>fig|6666666.640629.peg.755</a>, <a href=&#39;?page=Annotation&feature=fig|6666666.640629.peg.4221&#39; target=_blank>fig|6666666.640629.peg.4221</a>	yes
A and B	Amino Acids and Derivatives	Lysine, threonine, methionine, and cysteine	Methionine Degradation	Methionine ABC transporter permease protein	<a href=&#39;?page=Annotation&feature=fig|59843.19.peg.1072&#39; target=_blank>fig|59843.19.peg.1072</a>, <a href=&#39;?page=Annotation&feature=fig|59843.19.peg.3251&#39; target=_blank>fig|59843.19.peg.3251</a>	yes	<a href=&#39;?page=Annotation&feature=fig|6666666.640629.peg.754&#39; target=_blank>fig|6666666.640629.peg.754</a>, <a href=&#39;?page=Annotation&feature=fig|6666666.640629.peg.4222&#39; target=_blank>fig|6666666.640629.peg.4222</a>	yes
A and B	Amino Acids and Derivatives	Lysine, threonine, methionine, and cysteine	Methionine Degradation	Methionine ABC transporter substrate-binding protein	<a href=&#39;?page=Annotation&feature=fig|59843.19.peg.1071&#39; target=_blank>fig|59843.19.peg.1071</a>, <a href=&#39;?page=Annotation&feature=fig|59843.19.peg.3252&#39; target=_blank>fig|59843.19.peg.3252</a>	yes	<a href=&#39;?page=Annotation&feature=fig|6666666.640629.peg.753&#39; target=_blank>fig|6666666.640629.peg.753</a>, <a href=&#39;?page=Annotation&feature=fig|6666666.640629.peg.4223&#39; target=_blank>fig|6666666.640629.peg.4223</a>	yes
A and B	Amino Acids and Derivatives	Lysine, threonine, methionine, and cysteine	Methionine Degradation	S-adenosylhomocysteine nucleosidase (EC 3.2.2.9)	<a href=&#39;?page=Annotation&feature=fig|59843.19.peg.3848&#39; target=_blank>fig|59843.19.peg.3848</a>	yes	<a href=&#39;?page=Annotation&feature=fig|6666666.640629.peg.236&#39; target=_blank>fig|6666666.640629.peg.236</a>, <a href=&#39;?page=Annotation&feature=fig|6666666.640629.peg.1241&#39; target=_blank>fig|6666666.640629.peg.1241</a>, <a href=&#39;?page=Annotation&feature=fig|6666666.640629.peg.1973&#39; target=_blank>fig|6666666.640629.peg.1973</a>	yes
A and B	Amino Acids and Derivatives	Lysine, threonine, methionine, and cysteine	Methionine Degradation	S-adenosylmethionine synthetase (EC 2.5.1.6)	<a href=&#39;?page=Annotation&feature=fig|59843.19.peg.1535&#39; target=_blank>fig|59843.19.peg.1535</a>	yes	<a href=&#39;?page=Annotation&feature=fig|6666666.640629.peg.683&#39; target=_blank>fig|6666666.640629.peg.683</a>	yes
A and B	Amino Acids and Derivatives	Lysine, threonine, methionine, and cysteine	Threonine and Homoserine Biosynthesis	Aspartate aminotransferase (EC 2.6.1.1)	<a href=&#39;?page=Annotation&feature=fig|59843.19.peg.306&#39; target=_blank>fig|59843.19.peg.306</a>, <a href=&#39;?page=Annotation&feature=fig|59843.19.peg.308&#39; target=_blank>fig|59843.19.peg.308</a>, <a href=&#39;?page=Annotation&feature=fig|59843.19.peg.422&#39; target=_blank>fig|59843.19.peg.422</a>, <a href=&#39;?page=Annotation&feature=fig|59843.19.peg.640&#39; target=_blank>fig|59843…	yes	<a href=&#39;?page=Annotation&feature=fig|6666666.640629.peg.518&#39; target=_blank>fig|6666666.640629.peg.518</a>, <a href=&#39;?page=Annotation&feature=fig|6666666.640629.peg.1220&#39; target=_blank>fig|6666666.640629.peg.1220</a>, <a href=&#39;?page=Annotation&feature=fig|6666666.640629.peg.2473&#39; target=_blank>fig|6666666.640629.peg.2473</a>	yes
A and B	Amino Acids and Derivatives	Lysine, threonine, methionine, and cysteine	Threonine and Homoserine Biosynthesis	Aspartate-semialdehyde dehydrogenase (EC 1.2.1.11)	<a href=&#39;?page=Annotation&feature=fig|59843.19.peg.4646&#39; target=_blank>fig|59843.19.peg.4646</a>, <a href=&#39;?page=Annotation&feature=fig|59843.19.peg.5403&#39; target=_blank>fig|59843.19.peg.5403</a>	yes	<a href=&#39;?page=Annotation&feature=fig|6666666.640629.peg.3477&#39; target=_blank>fig|6666666.640629.peg.3477</a>	yes
A and B	Amino Acids and Derivatives	Lysine, threonine, methionine, and cysteine	Threonine and Homoserine Biosynthesis	Aspartokinase (EC 2.7.2.4)	<a href=&#39;?page=Annotation&feature=fig|59843.19.peg.4021&#39; target=_blank>fig|59843.19.peg.4021</a>, <a href=&#39;?page=Annotation&feature=fig|59843.19.peg.5402&#39; target=_blank>fig|59843.19.peg.5402</a>	yes	<a href=&#39;?page=Annotation&feature=fig|6666666.640629.peg.385&#39; target=_blank>fig|6666666.640629.peg.385</a>, <a href=&#39;?page=Annotation&feature=fig|6666666.640629.peg.2843&#39; target=_blank>fig|6666666.640629.peg.2843</a>, <a href=&#39;?page=Annotation&feature=fig|6666666.640629.peg.3478&#39; target=_blank>fig|6666666.640629.peg.3478</a>	yes
A and B	Amino Acids and Derivatives	Lysine, threonine, methionine, and cysteine	Threonine and Homoserine Biosynthesis	Homoserine dehydrogenase (EC 1.1.1.3)	<a href=&#39;?page=Annotation&feature=fig|59843.19.peg.3456&#39; target=_blank>fig|59843.19.peg.3456</a>	yes	<a href=&#39;?page=Annotation&feature=fig|6666666.640629.peg.3119&#39; target=_blank>fig|6666666.640629.peg.3119</a>, <a href=&#39;?page=Annotation&feature=fig|6666666.640629.peg.4324&#39; target=_blank>fig|6666666.640629.peg.4324</a>	yes
A and B	Amino Acids and Derivatives	Lysine, threonine, methionine, and cysteine	Threonine and Homoserine Biosynthesis	Homoserine kinase (EC 2.7.1.39)	<a href=&#39;?page=Annotation&feature=fig|59843.19.peg.2342&#39; target=_blank>fig|59843.19.peg.2342</a>, <a href=&#39;?page=Annotation&feature=fig|59843.19.peg.3458&#39; target=_blank>fig|59843.19.peg.3458</a>, <a href=&#39;?page=Annotation&feature=fig|59843.19.peg.4190&#39; target=_blank>fig|59843.19.peg.4190</a>, <a href=&#39;?page=Annotation&feature=fig|59843.19.peg.4654&#39; target=_blank>fi…	yes	<a href=&#39;?page=Annotation&feature=fig|6666666.640629.peg.3117&#39; target=_blank>fig|6666666.640629.peg.3117</a>	yes
A and B	Amino Acids and Derivatives	Lysine, threonine, methionine, and cysteine	Threonine and Homoserine Biosynthesis	Threonine synthase (EC 4.2.3.1)	<a href=&#39;?page=Annotation&feature=fig|59843.19.peg.3457&#39; target=_blank>fig|59843.19.peg.3457</a>	yes	<a href=&#39;?page=Annotation&feature=fig|6666666.640629.peg.3118&#39; target=_blank>fig|6666666.640629.peg.3118</a>	yes
A and B	Amino Acids and Derivatives	Lysine, threonine, methionine, and cysteine	Threonine degradation	L-threonine 3-dehydrogenase (EC 1.1.1.103)	<a href=&#39;?page=Annotation&feature=fig|59843.19.peg.319&#39; target=_blank>fig|59843.19.peg.319</a>	yes	<a href=&#39;?page=Annotation&feature=fig|6666666.640629.peg.3500&#39; target=_blank>fig|6666666.640629.peg.3500</a>	yes
A	Amino Acids and Derivatives	Lysine, threonine, methionine, and cysteine	Cysteine Biosynthesis	Sulfate and thiosulfate binding protein CysP	<a href=&#39;?page=Annotation&feature=fig|59843.19.peg.790&#39; target=_blank>fig|59843.19.peg.790</a>, <a href=&#39;?page=Annotation&feature=fig|59843.19.peg.2640&#39; target=_blank>fig|59843.19.peg.2640</a>	yes	<input type=&#39;button&#39; class=&#39;button&#39; value=&#39;find&#39; onclick=&#39;window.open("?page=SearchGene&fr=Sulfate and thiosulfate binding protein CysP&organism=6666666.640629&subsystem=Cysteine_Biosynthesis&template_gene=fig|59843.19.peg.790");&#39;>	no
A	Amino Acids and Derivatives	Lysine, threonine, methionine, and cysteine	Cysteine Biosynthesis	Sulfate and thiosulfate import ATP-binding protein CysA (EC 3.6.3.25)	<a href=&#39;?page=Annotation&feature=fig|59843.19.peg.791&#39; target=_blank>fig|59843.19.peg.791</a>	yes	<input type=&#39;button&#39; class=&#39;button&#39; value=&#39;find&#39; onclick=&#39;window.open("?page=SearchGene&fr=Sulfate and thiosulfate import ATP-binding protein CysA (EC 3.6.3.25)&organism=6666666.640629&subsystem=Cysteine_Biosynthesis&template_gene=fig|59843.19.peg.791");&#39;>	no
A	Amino Acids and Derivatives	Lysine, threonine, methionine, and cysteine	Cysteine Biosynthesis	Sulfate transport system permease protein CysT	<a href=&#39;?page=Annotation&feature=fig|59843.19.peg.793&#39; target=_blank>fig|59843.19.peg.793</a>, <a href=&#39;?page=Annotation&feature=fig|59843.19.peg.2641&#39; target=_blank>fig|59843.19.peg.2641</a>	yes	<input type=&#39;button&#39; class=&#39;button&#39; value=&#39;find&#39; onclick=&#39;window.open("?page=SearchGene&fr=Sulfate transport system permease protein CysT&organism=6666666.640629&subsystem=Cysteine_Biosynthesis&template_gene=fig|59843.19.peg.793");&#39;>	no
A	Amino Acids and Derivatives	Lysine, threonine, methionine, and cysteine	Cysteine Biosynthesis	Sulfate transport system permease protein CysW	<a href=&#39;?page=Annotation&feature=fig|59843.19.peg.792&#39; target=_blank>fig|59843.19.peg.792</a>, <a href=&#39;?page=Annotation&feature=fig|59843.19.peg.2642&#39; target=_blank>fig|59843.19.peg.2642</a>	yes	<input type=&#39;button&#39; class=&#39;button&#39; value=&#39;find&#39; onclick=&#39;window.open("?page=SearchGene&fr=Sulfate transport system permease protein CysW&organism=6666666.640629&subsystem=Cysteine_Biosynthesis&template_gene=fig|59843.19.peg.792");&#39;>	no
A	Amino Acids and Derivatives	Lysine, threonine, methionine, and cysteine	Lysine Biosynthesis DAP Pathway	Meso-diaminopimelate D-dehydrogenase (EC 1.4.1.16)	<a href=&#39;?page=Annotation&feature=fig|59843.19.peg.569&#39; target=_blank>fig|59843.19.peg.569</a>	yes	<input type=&#39;button&#39; class=&#39;button&#39; value=&#39;find&#39; onclick=&#39;window.open("?page=SearchGene&fr=Meso-diaminopimelate D-dehydrogenase (EC 1.4.1.16)&organism=6666666.640629&subsystem=Lysine_Biosynthesis_DAP_Pathway&template_gene=fig|59843.19.peg.569");&#39;>	no
A	Amino Acids and Derivatives	Lysine, threonine, methionine, and cysteine	Methionine Biosynthesis	Adenosylhomocysteinase (EC 3.3.1.1)	<a href=&#39;?page=Annotation&feature=fig|59843.19.peg.3718&#39; target=_blank>fig|59843.19.peg.3718</a>	yes	<input type=&#39;button&#39; class=&#39;button&#39; value=&#39;find&#39; onclick=&#39;window.open("?page=SearchGene&fr=Adenosylhomocysteinase (EC 3.3.1.1)&organism=6666666.640629&subsystem=Methionine_Biosynthesis&template_gene=fig|59843.19.peg.3718");&#39;>	no
A	Amino Acids and Derivatives	Lysine, threonine, methionine, and cysteine	Methionine Biosynthesis	Homoserine O-succinyltransferase (EC 2.3.1.46)	<a href=&#39;?page=Annotation&feature=fig|59843.19.peg.677&#39; target=_blank>fig|59843.19.peg.677</a>	yes	<input type=&#39;button&#39; class=&#39;button&#39; value=&#39;find&#39; onclick=&#39;window.open("?page=SearchGene&fr=Homoserine O-succinyltransferase (EC 2.3.1.46)&organism=6666666.640629&subsystem=Methionine_Biosynthesis&template_gene=fig|59843.19.peg.677");&#39;>	no
A	Amino Acids and Derivatives	Lysine, threonine, methionine, and cysteine	Threonine degradation	Threonine dehydrogenase and related Zn-dependent dehydrogenases	<a href=&#39;?page=Annotation&feature=fig|59843.19.peg.4410&#39; target=_blank>fig|59843.19.peg.4410</a>	yes	<input type=&#39;button&#39; class=&#39;button&#39; value=&#39;find&#39; onclick=&#39;window.open("?page=SearchGene&fr=Threonine dehydrogenase and related Zn-dependent dehydrogenases&organism=6666666.640629&subsystem=Threonine_degradation&template_gene=fig|59843.19.peg.4410");&#39;>	no
B	Amino Acids and Derivatives	Lysine, threonine, methionine, and cysteine	Cysteine Biosynthesis	Adenylylsulfate kinase (EC 2.7.1.25)	<input type=&#39;button&#39; value=&#39;find&#39; onclick=&#39;window.open("?page=SearchGene&fr=Adenylylsulfate kinase (EC 2.7.1.25)&organism=59843.19&subsystem=Cysteine_Biosynthesis&template_gene=fig|6666666.640629.peg.2378");&#39;>	no	<a href=&#39;?page=Annotation&feature=fig|6666666.640629.peg.2378&#39; target=_blank>fig|6666666.640629.peg.2378</a>	yes
B	Amino Acids and Derivatives	Lysine, threonine, methionine, and cysteine	Cysteine Biosynthesis	Cystathionine beta-synthase (EC 4.2.1.22)	<input type=&#39;button&#39; value=&#39;find&#39; onclick=&#39;window.open("?page=SearchGene&fr=Cystathionine beta-synthase (EC 4.2.1.22)&organism=59843.19&subsystem=Cysteine_Biosynthesis&template_gene=fig|6666666.640629.peg.3340");&#39;>	no	<a href=&#39;?page=Annotation&feature=fig|6666666.640629.peg.3340&#39; target=_blank>fig|6666666.640629.peg.3340</a>	yes
B	Amino Acids and Derivatives	Lysine, threonine, methionine, and cysteine	Cysteine Biosynthesis	Cystathionine gamma-lyase (EC 4.4.1.1)	<input type=&#39;button&#39; value=&#39;find&#39; onclick=&#39;window.open("?page=SearchGene&fr=Cystathionine gamma-lyase (EC 4.4.1.1)&organism=59843.19&subsystem=Cysteine_Biosynthesis&template_gene=fig|6666666.640629.peg.3341");&#39;>	no	<a href=&#39;?page=Annotation&feature=fig|6666666.640629.peg.3341&#39; target=_blank>fig|6666666.640629.peg.3341</a>	yes
B	Amino Acids and Derivatives	Lysine, threonine, methionine, and cysteine	Lysine Biosynthesis DAP Pathway	2,3,4,5-tetrahydropyridine-2,6-dicarboxylate N-acetyltransferase (EC 2.3.1.89)	<input type=&#39;button&#39; value=&#39;find&#39; onclick=&#39;window.open("?page=SearchGene&fr=2,3,4,5-tetrahydropyridine-2,6-dicarboxylate N-acetyltransferase (EC 2.3.1.89)&organism=59843.19&subsystem=Lysine_Biosynthesis_DAP_Pathway&template_gene=fig|6666666.640629.peg.2229");&#39;>	no	<a href=&#39;?page=Annotation&feature=fig|6666666.640629.peg.2229&#39; target=_blank>fig|6666666.640629.peg.2229</a>	yes
B	Amino Acids and Derivatives	Lysine, threonine, methionine, and cysteine	Lysine Biosynthesis DAP Pathway	N-acetyl-L,L-diaminopimelate aminotransferase (EC 2.6.1.-)	<input type=&#39;button&#39; value=&#39;find&#39; onclick=&#39;window.open("?page=SearchGene&fr=N-acetyl-L,L-diaminopimelate aminotransferase (EC 2.6.1.-)&organism=59843.19&subsystem=Lysine_Biosynthesis_DAP_Pathway&template_gene=fig|6666666.640629.peg.2206");&#39;>	no	<a href=&#39;?page=Annotation&feature=fig|6666666.640629.peg.2206&#39; target=_blank>fig|6666666.640629.peg.2206</a>	yes
B	Amino Acids and Derivatives	Lysine, threonine, methionine, and cysteine	Lysine Biosynthesis DAP Pathway	N-acetyl-L,L-diaminopimelate deacetylase (EC 3.5.1.47)	<input type=&#39;button&#39; value=&#39;find&#39; onclick=&#39;window.open("?page=SearchGene&fr=N-acetyl-L,L-diaminopimelate deacetylase (EC 3.5.1.47)&organism=59843.19&subsystem=Lysine_Biosynthesis_DAP_Pathway&template_gene=fig|6666666.640629.peg.2231");&#39;>	no	<a href=&#39;?page=Annotation&feature=fig|6666666.640629.peg.2231&#39; target=_blank>fig|6666666.640629.peg.2231</a>	yes
B	Amino Acids and Derivatives	Lysine, threonine, methionine, and cysteine	Methionine Biosynthesis	Betaine--homocysteine S-methyltransferase (EC 2.1.1.5)	<input type=&#39;button&#39; value=&#39;find&#39; onclick=&#39;window.open("?page=SearchGene&fr=Betaine--homocysteine S-methyltransferase (EC 2.1.1.5)&organism=59843.19&subsystem=Methionine_Biosynthesis&template_gene=fig|6666666.640629.peg.535");&#39;>	no	<a href=&#39;?page=Annotation&feature=fig|6666666.640629.peg.535&#39; target=_blank>fig|6666666.640629.peg.535</a>	yes
B	Amino Acids and Derivatives	Lysine, threonine, methionine, and cysteine	Methionine Biosynthesis	Homocysteine S-methyltransferase (EC 2.1.1.10)	<input type=&#39;button&#39; value=&#39;find&#39; onclick=&#39;window.open("?page=SearchGene&fr=Homocysteine S-methyltransferase (EC 2.1.1.10)&organism=59843.19&subsystem=Methionine_Biosynthesis&template_gene=fig|6666666.640629.peg.1765");&#39;>	no	<a href=&#39;?page=Annotation&feature=fig|6666666.640629.peg.1765&#39; target=_blank>fig|6666666.640629.peg.1765</a>	yes
B	Amino Acids and Derivatives	Lysine, threonine, methionine, and cysteine	Methionine Biosynthesis	Homoserine O-acetyltransferase (EC 2.3.1.31)	<input type=&#39;button&#39; value=&#39;find&#39; onclick=&#39;window.open("?page=SearchGene&fr=Homoserine O-acetyltransferase (EC 2.3.1.31)&organism=59843.19&subsystem=Methionine_Biosynthesis&template_gene=fig|6666666.640629.peg.3842");&#39;>	no	<a href=&#39;?page=Annotation&feature=fig|6666666.640629.peg.3842&#39; target=_blank>fig|6666666.640629.peg.3842</a>	yes
B	Amino Acids and Derivatives	Lysine, threonine, methionine, and cysteine	Methionine Biosynthesis	Methionine transporter MetT	<input type=&#39;button&#39; value=&#39;find&#39; onclick=&#39;window.open("?page=SearchGene&fr=Methionine transporter MetT&organism=59843.19&subsystem=Methionine_Biosynthesis&template_gene=fig|6666666.640629.peg.1683");&#39;>	no	<a href=&#39;?page=Annotation&feature=fig|6666666.640629.peg.1683&#39; target=_blank>fig|6666666.640629.peg.1683</a>, <a href=&#39;?page=Annotation&feature=fig|6666666.640629.peg.1684&#39; target=_blank>fig|6666666.640629.peg.1684</a>, <a href=&#39;?page=Annotation&feature=fig|6666666.640629.peg.1698&#39; target=_blank>fig|6666666.640629.peg.1698</a>	yes
B	Amino Acids and Derivatives	Lysine, threonine, methionine, and cysteine	Methionine Biosynthesis	S-ribosylhomocysteine lyase (EC 4.4.1.21)	<input type=&#39;button&#39; value=&#39;find&#39; onclick=&#39;window.open("?page=SearchGene&fr=S-ribosylhomocysteine lyase (EC 4.4.1.21)&organism=59843.19&subsystem=Methionine_Biosynthesis&template_gene=fig|6666666.640629.peg.3339");&#39;>	no	<a href=&#39;?page=Annotation&feature=fig|6666666.640629.peg.3339&#39; target=_blank>fig|6666666.640629.peg.3339</a>	yes
B	Amino Acids and Derivatives	Lysine, threonine, methionine, and cysteine	Methionine Biosynthesis	SAM-dependent methlytransferase YrrT	<input type=&#39;button&#39; value=&#39;find&#39; onclick=&#39;window.open("?page=SearchGene&fr=SAM-dependent methlytransferase YrrT&organism=59843.19&subsystem=Methionine_Biosynthesis&template_gene=fig|6666666.640629.peg.3338");&#39;>	no	<a href=&#39;?page=Annotation&feature=fig|6666666.640629.peg.3338&#39; target=_blank>fig|6666666.640629.peg.3338</a>	yes
B	Amino Acids and Derivatives	Lysine, threonine, methionine, and cysteine	Methionine Degradation	Methionine gamma-lyase (EC 4.4.1.11)	<input type=&#39;button&#39; value=&#39;find&#39; onclick=&#39;window.open("?page=SearchGene&fr=Methionine gamma-lyase (EC 4.4.1.11)&organism=59843.19&subsystem=Methionine_Degradation&template_gene=fig|6666666.640629.peg.3828");&#39;>	no	<a href=&#39;?page=Annotation&feature=fig|6666666.640629.peg.3828&#39; target=_blank>fig|6666666.640629.peg.3828</a>	yes
B	Amino Acids and Derivatives	Lysine, threonine, methionine, and cysteine	Threonine degradation	low-specificity D-threonine aldolase	<input type=&#39;button&#39; value=&#39;find&#39; onclick=&#39;window.open("?page=SearchGene&fr=low-specificity D-threonine aldolase&organism=59843.19&subsystem=Threonine_degradation&template_gene=fig|6666666.640629.peg.2691");&#39;>	no	<a href=&#39;?page=Annotation&feature=fig|6666666.640629.peg.2691&#39; target=_blank>fig|6666666.640629.peg.2691</a>	yes
B	Amino Acids and Derivatives	Polyamines	DAP (1,3-diaminopropane) production	Siderophore biosynthesis L-2,4-diaminobutyrate decarboxylase	<input type=&#39;button&#39; value=&#39;find&#39; onclick=&#39;window.open("?page=SearchGene&fr=Siderophore biosynthesis L-2,4-diaminobutyrate decarboxylase&organism=59843.19&subsystem=DAP_(1,3-diaminopropane)_production&template_gene=fig|6666666.640629.peg.2848");&#39;>	no	<a href=&#39;?page=Annotation&feature=fig|6666666.640629.peg.2848&#39; target=_blank>fig|6666666.640629.peg.2848</a>	yes
B	Amino Acids and Derivatives	Polyamines	DAP (1,3-diaminopropane) production	Siderophore biosynthesis diaminobutyrate--2-oxoglutarate aminotransferase (EC 2.6.1.76)	<input type=&#39;button&#39; value=&#39;find&#39; onclick=&#39;window.open("?page=SearchGene&fr=Siderophore biosynthesis diaminobutyrate--2-oxoglutarate aminotransferase (EC 2.6.1.76)&organism=59843.19&subsystem=DAP_(1,3-diaminopropane)_production&template_gene=fig|6666666.640629.peg.2849");&#39;>	no	<a href=&#39;?page=Annotation&feature=fig|6666666.640629.peg.2849&#39; target=_blank>fig|6666666.640629.peg.2849</a>	yes
A and B	Amino Acids and Derivatives	Proline and 4-hydroxyproline	Proline, 4-hydroxyproline uptake and utilization	Delta-1-pyrroline-5-carboxylate dehydrogenase (EC 1.2.1.88)	<a href=&#39;?page=Annotation&feature=fig|59843.19.peg.438&#39; target=_blank>fig|59843.19.peg.438</a>	yes	<a href=&#39;?page=Annotation&feature=fig|6666666.640629.peg.1794&#39; target=_blank>fig|6666666.640629.peg.1794</a>, <a href=&#39;?page=Annotation&feature=fig|6666666.640629.peg.2764&#39; target=_blank>fig|6666666.640629.peg.2764</a>	yes
A and B	Amino Acids and Derivatives	Proline and 4-hydroxyproline	Proline Synthesis	Gamma-glutamyl phosphate reductase (EC 1.2.1.41)	<a href=&#39;?page=Annotation&feature=fig|59843.19.peg.4201&#39; target=_blank>fig|59843.19.peg.4201</a>	yes	<a href=&#39;?page=Annotation&feature=fig|6666666.640629.peg.3199&#39; target=_blank>fig|6666666.640629.peg.3199</a>	yes
A and B	Amino Acids and Derivatives	Proline and 4-hydroxyproline	Proline Synthesis	Glutamate 5-kinase (EC 2.7.2.11)	<a href=&#39;?page=Annotation&feature=fig|59843.19.peg.4202&#39; target=_blank>fig|59843.19.peg.4202</a>	yes	<a href=&#39;?page=Annotation&feature=fig|6666666.640629.peg.1987&#39; target=_blank>fig|6666666.640629.peg.1987</a>, <a href=&#39;?page=Annotation&feature=fig|6666666.640629.peg.3198&#39; target=_blank>fig|6666666.640629.peg.3198</a>	yes
A and B	Amino Acids and Derivatives	Proline and 4-hydroxyproline	Proline Synthesis	NADP-specific glutamate dehydrogenase (EC 1.4.1.4)	<a href=&#39;?page=Annotation&feature=fig|59843.19.peg.568&#39; target=_blank>fig|59843.19.peg.568</a>	yes	<a href=&#39;?page=Annotation&feature=fig|6666666.640629.peg.1566&#39; target=_blank>fig|6666666.640629.peg.1566</a>, <a href=&#39;?page=Annotation&feature=fig|6666666.640629.peg.3181&#39; target=_blank>fig|6666666.640629.peg.3181</a>	yes
A and B	Amino Acids and Derivatives	Proline and 4-hydroxyproline	Proline Synthesis	Pyrroline-5-carboxylate reductase (EC 1.5.1.2)	<a href=&#39;?page=Annotation&feature=fig|59843.19.peg.4200&#39; target=_blank>fig|59843.19.peg.4200</a>	yes	<a href=&#39;?page=Annotation&feature=fig|6666666.640629.peg.1295&#39; target=_blank>fig|6666666.640629.peg.1295</a>, <a href=&#39;?page=Annotation&feature=fig|6666666.640629.peg.3197&#39; target=_blank>fig|6666666.640629.peg.3197</a>	yes
A and B	Amino Acids and Derivatives	Proline and 4-hydroxyproline	Proline Synthesis	RNA-binding C-terminal domain PUA	<a href=&#39;?page=Annotation&feature=fig|59843.19.peg.4202&#39; target=_blank>fig|59843.19.peg.4202</a>	yes	<a href=&#39;?page=Annotation&feature=fig|6666666.640629.peg.1987&#39; target=_blank>fig|6666666.640629.peg.1987</a>, <a href=&#39;?page=Annotation&feature=fig|6666666.640629.peg.3198&#39; target=_blank>fig|6666666.640629.peg.3198</a>	yes
B	Amino Acids and Derivatives	Proline and 4-hydroxyproline	Proline, 4-hydroxyproline uptake and utilization	Proline/sodium symporter PutP (TC 2.A.21.2.1)	<input type=&#39;button&#39; value=&#39;find&#39; onclick=&#39;window.open("?page=SearchGene&fr=Proline/sodium symporter PutP (TC 2.A.21.2.1)&organism=59843.19&subsystem=Proline,_4-hydroxyproline_uptake_and_utilization&template_gene=fig|6666666.640629.peg.1792");&#39;>	no	<a href=&#39;?page=Annotation&feature=fig|6666666.640629.peg.1792&#39; target=_blank>fig|6666666.640629.peg.1792</a>, <a href=&#39;?page=Annotation&feature=fig|6666666.640629.peg.2129&#39; target=_blank>fig|6666666.640629.peg.2129</a>	yes
B	Amino Acids and Derivatives	Proline and 4-hydroxyproline	Proline, 4-hydroxyproline uptake and utilization	Similar to eukaryotic Peptidyl prolyl 4-hydroxylase, alpha subunit (EC 1.14.11.2)	<input type=&#39;button&#39; value=&#39;find&#39; onclick=&#39;window.open("?page=SearchGene&fr=Similar to eukaryotic Peptidyl prolyl 4-hydroxylase, alpha subunit (EC 1.14.11.2)&organism=59843.19&subsystem=Proline,_4-hydroxyproline_uptake_and_utilization&template_gene=fig|6666666.640629.peg.1908");&#39;>	no	<a href=&#39;?page=Annotation&feature=fig|6666666.640629.peg.1908&#39; target=_blank>fig|6666666.640629.peg.1908</a>	yes
A	Amino Acids and Derivatives	no subcategory	Creatine and Creatinine Degradation	Cytosine deaminase (EC 3.5.4.1)	<a href=&#39;?page=Annotation&feature=fig|59843.19.peg.384&#39; target=_blank>fig|59843.19.peg.384</a>, <a href=&#39;?page=Annotation&feature=fig|59843.19.peg.4655&#39; target=_blank>fig|59843.19.peg.4655</a>	yes	<input type=&#39;button&#39; class=&#39;button&#39; value=&#39;find&#39; onclick=&#39;window.open("?page=SearchGene&fr=Cytosine deaminase (EC 3.5.4.1)&organism=6666666.640629&subsystem=Creatine_and_Creatinine_Degradation&template_gene=fig|59843.19.peg.384");&#39;>	no
A and B	Carbohydrates	Aminosugars	Chitin and N-acetylglucosamine utilization	Glucosamine-6-phosphate deaminase (EC 3.5.99.6)	<a href=&#39;?page=Annotation&feature=fig|59843.19.peg.2558&#39; target=_blank>fig|59843.19.peg.2558</a>, <a href=&#39;?page=Annotation&feature=fig|59843.19.peg.3131&#39; target=_blank>fig|59843.19.peg.3131</a>, <a href=&#39;?page=Annotation&feature=fig|59843.19.peg.3365&#39; target=_blank>fig|59843.19.peg.3365</a>	yes	<a href=&#39;?page=Annotation&feature=fig|6666666.640629.peg.2831&#39; target=_blank>fig|6666666.640629.peg.2831</a>	yes
A and B	Carbohydrates	Aminosugars	Chitin and N-acetylglucosamine utilization	N-Acetyl-D-glucosamine ABC transport system, permease protein 2	<a href=&#39;?page=Annotation&feature=fig|59843.19.peg.2485&#39; target=_blank>fig|59843.19.peg.2485</a>, <a href=&#39;?page=Annotation&feature=fig|59843.19.peg.2494&#39; target=_blank>fig|59843.19.peg.2494</a>, <a href=&#39;?page=Annotation&feature=fig|59843.19.peg.4623&#39; target=_blank>fig|59843.19.peg.4623</a>	yes	<a href=&#39;?page=Annotation&feature=fig|6666666.640629.peg.655&#39; target=_blank>fig|6666666.640629.peg.655</a>	yes
A and B	Carbohydrates	Aminosugars	Chitin and N-acetylglucosamine utilization	N-Acetyl-D-glucosamine ABC transport system, sugar-binding protein	<a href=&#39;?page=Annotation&feature=fig|59843.19.peg.2483&#39; target=_blank>fig|59843.19.peg.2483</a>, <a href=&#39;?page=Annotation&feature=fig|59843.19.peg.2552&#39; target=_blank>fig|59843.19.peg.2552</a>, <a href=&#39;?page=Annotation&feature=fig|59843.19.peg.3303&#39; target=_blank>fig|59843.19.peg.3303</a>, <a href=&#39;?page=Annotation&feature=fig|59843.19.peg.3997&#39; target=_blank>fi…	yes	<a href=&#39;?page=Annotation&feature=fig|6666666.640629.peg.1021&#39; target=_blank>fig|6666666.640629.peg.1021</a>, <a href=&#39;?page=Annotation&feature=fig|6666666.640629.peg.1125&#39; target=_blank>fig|6666666.640629.peg.1125</a>	yes
A and B	Carbohydrates	Aminosugars	Chitin and N-acetylglucosamine utilization	N-acetylglucosamine-6-phosphate deacetylase (EC 3.5.1.25)	<a href=&#39;?page=Annotation&feature=fig|59843.19.peg.2560&#39; target=_blank>fig|59843.19.peg.2560</a>, <a href=&#39;?page=Annotation&feature=fig|59843.19.peg.3132&#39; target=_blank>fig|59843.19.peg.3132</a>, <a href=&#39;?page=Annotation&feature=fig|59843.19.peg.3364&#39; target=_blank>fig|59843.19.peg.3364</a>	yes	<a href=&#39;?page=Annotation&feature=fig|6666666.640629.peg.2832&#39; target=_blank>fig|6666666.640629.peg.2832</a>	yes
A and B	Carbohydrates	Aminosugars	Chitin and N-acetylglucosamine utilization	Predicted transcriptional regulator of N-Acetylglucosamine utilization, GntR family	<a href=&#39;?page=Annotation&feature=fig|59843.19.peg.5019&#39; target=_blank>fig|59843.19.peg.5019</a>	yes	<a href=&#39;?page=Annotation&feature=fig|6666666.640629.peg.2830&#39; target=_blank>fig|6666666.640629.peg.2830</a>	yes
A	Carbohydrates	Aminosugars	Chitin and N-acetylglucosamine utilization	Chitin binding protein	<a href=&#39;?page=Annotation&feature=fig|59843.19.peg.1316&#39; target=_blank>fig|59843.19.peg.1316</a>, <a href=&#39;?page=Annotation&feature=fig|59843.19.peg.2761&#39; target=_blank>fig|59843.19.peg.2761</a>	yes	<input type=&#39;button&#39; class=&#39;button&#39; value=&#39;find&#39; onclick=&#39;window.open("?page=SearchGene&fr=Chitin binding protein&organism=6666666.640629&subsystem=Chitin_and_N-acetylglucosamine_utilization&template_gene=fig|59843.19.peg.1316");&#39;>	no
A	Carbohydrates	Aminosugars	Chitin and N-acetylglucosamine utilization	Chitinase (EC 3.2.1.14)	<a href=&#39;?page=Annotation&feature=fig|59843.19.peg.1313&#39; target=_blank>fig|59843.19.peg.1313</a>, <a href=&#39;?page=Annotation&feature=fig|59843.19.peg.1707&#39; target=_blank>fig|59843.19.peg.1707</a>, <a href=&#39;?page=Annotation&feature=fig|59843.19.peg.1716&#39; target=_blank>fig|59843.19.peg.1716</a>, <a href=&#39;?page=Annotation&feature=fig|59843.19.peg.1852&#39; target=_blank>fi…	yes	<input type=&#39;button&#39; class=&#39;button&#39; value=&#39;find&#39; onclick=&#39;window.open("?page=SearchGene&fr=Chitinase (EC 3.2.1.14)&organism=6666666.640629&subsystem=Chitin_and_N-acetylglucosamine_utilization&template_gene=fig|59843.19.peg.1313");&#39;>	no
A	Carbohydrates	Aminosugars	Chitin and N-acetylglucosamine utilization	N-Acetyl-D-glucosamine ABC transport system, permease protein 1	<a href=&#39;?page=Annotation&feature=fig|59843.19.peg.2484&#39; target=_blank>fig|59843.19.peg.2484</a>, <a href=&#39;?page=Annotation&feature=fig|59843.19.peg.2553&#39; target=_blank>fig|59843.19.peg.2553</a>, <a href=&#39;?page=Annotation&feature=fig|59843.19.peg.3126&#39; target=_blank>fig|59843.19.peg.3126</a>, <a href=&#39;?page=Annotation&feature=fig|59843.19.peg.4908&#39; target=_blank>fi…	yes	<input type=&#39;button&#39; class=&#39;button&#39; value=&#39;find&#39; onclick=&#39;window.open("?page=SearchGene&fr=N-Acetyl-D-glucosamine ABC transport system, permease protein 1&organism=6666666.640629&subsystem=Chitin_and_N-acetylglucosamine_utilization&template_gene=fig|59843.19.peg.2484");&#39;>	no
A	Carbohydrates	Aminosugars	Chitin and N-acetylglucosamine utilization	N-acetylglucosamine kinase of eukaryotic type (EC 2.7.1.59)	<a href=&#39;?page=Annotation&feature=fig|59843.19.peg.595&#39; target=_blank>fig|59843.19.peg.595</a>, <a href=&#39;?page=Annotation&feature=fig|59843.19.peg.1764&#39; target=_blank>fig|59843.19.peg.1764</a>	yes	<input type=&#39;button&#39; class=&#39;button&#39; value=&#39;find&#39; onclick=&#39;window.open("?page=SearchGene&fr=N-acetylglucosamine kinase of eukaryotic type (EC 2.7.1.59)&organism=6666666.640629&subsystem=Chitin_and_N-acetylglucosamine_utilization&template_gene=fig|59843.19.peg.595");&#39;>	no
A and B	Carbohydrates	Central carbohydrate metabolism	Dehydrogenase complexes	2-oxoglutarate dehydrogenase E1 component (EC 1.2.4.2)	<a href=&#39;?page=Annotation&feature=fig|59843.19.peg.5299&#39; target=_blank>fig|59843.19.peg.5299</a>	yes	<a href=&#39;?page=Annotation&feature=fig|6666666.640629.peg.1291&#39; target=_blank>fig|6666666.640629.peg.1291</a>	yes
A and B	Carbohydrates	Central carbohydrate metabolism	Dehydrogenase complexes	Branched-chain alpha-keto acid dehydrogenase, E1 component, alpha subunit (EC 1.2.4.4)	<a href=&#39;?page=Annotation&feature=fig|59843.19.peg.4058&#39; target=_blank>fig|59843.19.peg.4058</a>	yes	<a href=&#39;?page=Annotation&feature=fig|6666666.640629.peg.394&#39; target=_blank>fig|6666666.640629.peg.394</a>	yes
A and B	Carbohydrates	Central carbohydrate metabolism	Dehydrogenase complexes	Branched-chain alpha-keto acid dehydrogenase, E1 component, beta subunit (EC 1.2.4.4)	<a href=&#39;?page=Annotation&feature=fig|59843.19.peg.4059&#39; target=_blank>fig|59843.19.peg.4059</a>	yes	<a href=&#39;?page=Annotation&feature=fig|6666666.640629.peg.395&#39; target=_blank>fig|6666666.640629.peg.395</a>	yes
A and B	Carbohydrates	Central carbohydrate metabolism	Dehydrogenase complexes	Cytosol aminopeptidase PepA (EC 3.4.11.1)	<a href=&#39;?page=Annotation&feature=fig|59843.19.peg.712&#39; target=_blank>fig|59843.19.peg.712</a>, <a href=&#39;?page=Annotation&feature=fig|59843.19.peg.5156&#39; target=_blank>fig|59843.19.peg.5156</a>	yes	<a href=&#39;?page=Annotation&feature=fig|6666666.640629.peg.719&#39; target=_blank>fig|6666666.640629.peg.719</a>	yes
A and B	Carbohydrates	Central carbohydrate metabolism	Dehydrogenase complexes	Dihydrolipoamide acetyltransferase component of pyruvate dehydrogenase complex (EC 2.3.1.12)	<a href=&#39;?page=Annotation&feature=fig|59843.19.peg.4341&#39; target=_blank>fig|59843.19.peg.4341</a>	yes	<a href=&#39;?page=Annotation&feature=fig|6666666.640629.peg.2252&#39; target=_blank>fig|6666666.640629.peg.2252</a>	yes
A and B	Carbohydrates	Central carbohydrate metabolism	Dehydrogenase complexes	Dihydrolipoamide acyltransferase component of branched-chain alpha-keto acid dehydrogenase complex (EC 2.3.1.168)	<a href=&#39;?page=Annotation&feature=fig|59843.19.peg.4060&#39; target=_blank>fig|59843.19.peg.4060</a>	yes	<a href=&#39;?page=Annotation&feature=fig|6666666.640629.peg.396&#39; target=_blank>fig|6666666.640629.peg.396</a>	yes
A and B	Carbohydrates	Central carbohydrate metabolism	Dehydrogenase complexes	Dihydrolipoamide dehydrogenase of branched-chain alpha-keto acid dehydrogenase (EC 1.8.1.4)	<a href=&#39;?page=Annotation&feature=fig|59843.19.peg.4057&#39; target=_blank>fig|59843.19.peg.4057</a>	yes	<a href=&#39;?page=Annotation&feature=fig|6666666.640629.peg.393&#39; target=_blank>fig|6666666.640629.peg.393</a>	yes
A and B	Carbohydrates	Central carbohydrate metabolism	Dehydrogenase complexes	Dihydrolipoamide succinyltransferase component (E2) of 2-oxoglutarate dehydrogenase complex (EC 2.3.1.61)	<a href=&#39;?page=Annotation&feature=fig|59843.19.peg.5298&#39; target=_blank>fig|59843.19.peg.5298</a>	yes	<a href=&#39;?page=Annotation&feature=fig|6666666.640629.peg.1292&#39; target=_blank>fig|6666666.640629.peg.1292</a>	yes
A and B	Carbohydrates	Central carbohydrate metabolism	Dehydrogenase complexes	Pyruvate dehydrogenase E1 component alpha subunit (EC 1.2.4.1)	<a href=&#39;?page=Annotation&feature=fig|59843.19.peg.4339&#39; target=_blank>fig|59843.19.peg.4339</a>	yes	<a href=&#39;?page=Annotation&feature=fig|6666666.640629.peg.2250&#39; target=_blank>fig|6666666.640629.peg.2250</a>	yes
A and B	Carbohydrates	Central carbohydrate metabolism	Dehydrogenase complexes	Pyruvate dehydrogenase E1 component beta subunit (EC 1.2.4.1)	<a href=&#39;?page=Annotation&feature=fig|59843.19.peg.4340&#39; target=_blank>fig|59843.19.peg.4340</a>	yes	<a href=&#39;?page=Annotation&feature=fig|6666666.640629.peg.2251&#39; target=_blank>fig|6666666.640629.peg.2251</a>	yes
A and B	Carbohydrates	Central carbohydrate metabolism	Methylglyoxal Metabolism	Aldehyde dehydrogenase (EC 1.2.1.3)	<a href=&#39;?page=Annotation&feature=fig|59843.19.peg.1036&#39; target=_blank>fig|59843.19.peg.1036</a>, <a href=&#39;?page=Annotation&feature=fig|59843.19.peg.1036&#39; target=_blank>fig|59843.19.peg.1036</a>, <a href=&#39;?page=Annotation&feature=fig|59843.19.peg.1872&#39; target=_blank>fig|59843.19.peg.1872</a>, <a href=&#39;?page=Annotation&feature=fig|59843.19.peg.1872&#39; target=_blank>fi…	yes	<a href=&#39;?page=Annotation&feature=fig|6666666.640629.peg.412&#39; target=_blank>fig|6666666.640629.peg.412</a>, <a href=&#39;?page=Annotation&feature=fig|6666666.640629.peg.412&#39; target=_blank>fig|6666666.640629.peg.412</a>, <a href=&#39;?page=Annotation&feature=fig|6666666.640629.peg.699&#39; target=_blank>fig|6666666.640629.peg.699</a>, <a href=&#39;?page=Annotation&feature=fig|6666666.6…	yes
A and B	Carbohydrates	Central carbohydrate metabolism	Methylglyoxal Metabolism	Methylglyoxal synthase (EC 4.2.3.3)	<a href=&#39;?page=Annotation&feature=fig|59843.19.peg.4167&#39; target=_blank>fig|59843.19.peg.4167</a>	yes	<a href=&#39;?page=Annotation&feature=fig|6666666.640629.peg.2483&#39; target=_blank>fig|6666666.640629.peg.2483</a>	yes
A and B	Carbohydrates	Central carbohydrate metabolism	Pentose phosphate pathway	6-phosphogluconate dehydrogenase, decarboxylating (EC 1.1.1.44)	<a href=&#39;?page=Annotation&feature=fig|59843.19.peg.1977&#39; target=_blank>fig|59843.19.peg.1977</a>, <a href=&#39;?page=Annotation&feature=fig|59843.19.peg.2377&#39; target=_blank>fig|59843.19.peg.2377</a>, <a href=&#39;?page=Annotation&feature=fig|59843.19.peg.3836&#39; target=_blank>fig|59843.19.peg.3836</a>	yes	<a href=&#39;?page=Annotation&feature=fig|6666666.640629.peg.1005&#39; target=_blank>fig|6666666.640629.peg.1005</a>	yes
A and B	Carbohydrates	Central carbohydrate metabolism	Pentose phosphate pathway	6-phosphogluconolactonase (EC 3.1.1.31)	<a href=&#39;?page=Annotation&feature=fig|59843.19.peg.5296&#39; target=_blank>fig|59843.19.peg.5296</a>	yes	<a href=&#39;?page=Annotation&feature=fig|6666666.640629.peg.1007&#39; target=_blank>fig|6666666.640629.peg.1007</a>	yes
A and B	Carbohydrates	Central carbohydrate metabolism	Pentose phosphate pathway	Glucose-6-phosphate 1-dehydrogenase (EC 1.1.1.49)	<a href=&#39;?page=Annotation&feature=fig|59843.19.peg.1115&#39; target=_blank>fig|59843.19.peg.1115</a>, <a href=&#39;?page=Annotation&feature=fig|59843.19.peg.2376&#39; target=_blank>fig|59843.19.peg.2376</a>	yes	<a href=&#39;?page=Annotation&feature=fig|6666666.640629.peg.1006&#39; target=_blank>fig|6666666.640629.peg.1006</a>	yes
A and B	Carbohydrates	Central carbohydrate metabolism	Pentose phosphate pathway	Ribose-phosphate pyrophosphokinase (EC 2.7.6.1)	<a href=&#39;?page=Annotation&feature=fig|59843.19.peg.2019&#39; target=_blank>fig|59843.19.peg.2019</a>, <a href=&#39;?page=Annotation&feature=fig|59843.19.peg.2134&#39; target=_blank>fig|59843.19.peg.2134</a>	yes	<a href=&#39;?page=Annotation&feature=fig|6666666.640629.peg.464&#39; target=_blank>fig|6666666.640629.peg.464</a>, <a href=&#39;?page=Annotation&feature=fig|6666666.640629.peg.4280&#39; target=_blank>fig|6666666.640629.peg.4280</a>	yes
A and B	Carbohydrates	Central carbohydrate metabolism	Pentose phosphate pathway	Ribulose-phosphate 3-epimerase (EC 5.1.3.1)	<a href=&#39;?page=Annotation&feature=fig|59843.19.peg.3890&#39; target=_blank>fig|59843.19.peg.3890</a>	yes	<a href=&#39;?page=Annotation&feature=fig|6666666.640629.peg.2368&#39; target=_blank>fig|6666666.640629.peg.2368</a>, <a href=&#39;?page=Annotation&feature=fig|6666666.640629.peg.3651&#39; target=_blank>fig|6666666.640629.peg.3651</a>	yes
A and B	Carbohydrates	Central carbohydrate metabolism	Pentose phosphate pathway	Transaldolase (EC 2.2.1.2)	<a href=&#39;?page=Annotation&feature=fig|59843.19.peg.2378&#39; target=_blank>fig|59843.19.peg.2378</a>	yes	<a href=&#39;?page=Annotation&feature=fig|6666666.640629.peg.1174&#39; target=_blank>fig|6666666.640629.peg.1174</a>, <a href=&#39;?page=Annotation&feature=fig|6666666.640629.peg.3004&#39; target=_blank>fig|6666666.640629.peg.3004</a>	yes
A and B	Carbohydrates	Central carbohydrate metabolism	Pentose phosphate pathway	Transketolase (EC 2.2.1.1)	<a href=&#39;?page=Annotation&feature=fig|59843.19.peg.801&#39; target=_blank>fig|59843.19.peg.801</a>	yes	<a href=&#39;?page=Annotation&feature=fig|6666666.640629.peg.1172&#39; target=_blank>fig|6666666.640629.peg.1172</a>, <a href=&#39;?page=Annotation&feature=fig|6666666.640629.peg.1173&#39; target=_blank>fig|6666666.640629.peg.1173</a>, <a href=&#39;?page=Annotation&feature=fig|6666666.640629.peg.3520&#39; target=_blank>fig|6666666.640629.peg.3520</a>	yes
A and B	Carbohydrates	Central carbohydrate metabolism	Pyruvate Alanine Serine Interconversions	Alanine dehydrogenase (EC 1.4.1.1)	<a href=&#39;?page=Annotation&feature=fig|59843.19.peg.3277&#39; target=_blank>fig|59843.19.peg.3277</a>	yes	<a href=&#39;?page=Annotation&feature=fig|6666666.640629.peg.59&#39; target=_blank>fig|6666666.640629.peg.59</a>, <a href=&#39;?page=Annotation&feature=fig|6666666.640629.peg.1520&#39; target=_blank>fig|6666666.640629.peg.1520</a>, <a href=&#39;?page=Annotation&feature=fig|6666666.640629.peg.2835&#39; target=_blank>fig|6666666.640629.peg.2835</a>	yes
A and B	Carbohydrates	Central carbohydrate metabolism	Pyruvate Alanine Serine Interconversions	Alanine racemase (EC 5.1.1.1)	<a href=&#39;?page=Annotation&feature=fig|59843.19.peg.855&#39; target=_blank>fig|59843.19.peg.855</a>	yes	<a href=&#39;?page=Annotation&feature=fig|6666666.640629.peg.2834&#39; target=_blank>fig|6666666.640629.peg.2834</a>, <a href=&#39;?page=Annotation&feature=fig|6666666.640629.peg.3692&#39; target=_blank>fig|6666666.640629.peg.3692</a>	yes
A and B	Carbohydrates	Central carbohydrate metabolism	Pyruvate Alanine Serine Interconversions	Branched-chain amino acid aminotransferase (EC 2.6.1.42)	<a href=&#39;?page=Annotation&feature=fig|59843.19.peg.1766&#39; target=_blank>fig|59843.19.peg.1766</a>, <a href=&#39;?page=Annotation&feature=fig|59843.19.peg.3460&#39; target=_blank>fig|59843.19.peg.3460</a>	yes	<a href=&#39;?page=Annotation&feature=fig|6666666.640629.peg.1533&#39; target=_blank>fig|6666666.640629.peg.1533</a>, <a href=&#39;?page=Annotation&feature=fig|6666666.640629.peg.2775&#39; target=_blank>fig|6666666.640629.peg.2775</a>	yes
A and B	Carbohydrates	Central carbohydrate metabolism	Pyruvate Alanine Serine Interconversions	L-serine dehydratase, alpha subunit (EC 4.3.1.17)	<a href=&#39;?page=Annotation&feature=fig|59843.19.peg.2515&#39; target=_blank>fig|59843.19.peg.2515</a>	yes	<a href=&#39;?page=Annotation&feature=fig|6666666.640629.peg.2389&#39; target=_blank>fig|6666666.640629.peg.2389</a>	yes
A and B	Carbohydrates	Central carbohydrate metabolism	Pyruvate Alanine Serine Interconversions	L-serine dehydratase, beta subunit (EC 4.3.1.17)	<a href=&#39;?page=Annotation&feature=fig|59843.19.peg.2514&#39; target=_blank>fig|59843.19.peg.2514</a>	yes	<a href=&#39;?page=Annotation&feature=fig|6666666.640629.peg.2388&#39; target=_blank>fig|6666666.640629.peg.2388</a>	yes
A and B	Carbohydrates	Central carbohydrate metabolism	Pyruvate metabolism I: anaplerotic reactions, PEP	NADP-dependent malic enzyme (EC 1.1.1.40)	<a href=&#39;?page=Annotation&feature=fig|59843.19.peg.2144&#39; target=_blank>fig|59843.19.peg.2144</a>, <a href=&#39;?page=Annotation&feature=fig|59843.19.peg.2759&#39; target=_blank>fig|59843.19.peg.2759</a>	yes	<a href=&#39;?page=Annotation&feature=fig|6666666.640629.peg.74&#39; target=_blank>fig|6666666.640629.peg.74</a>, <a href=&#39;?page=Annotation&feature=fig|6666666.640629.peg.1876&#39; target=_blank>fig|6666666.640629.peg.1876</a>, <a href=&#39;?page=Annotation&feature=fig|6666666.640629.peg.2664&#39; target=_blank>fig|6666666.640629.peg.2664</a>, <a href=&#39;?page=Annotation&feature=fig|6666666…	yes
A and B	Carbohydrates	Central carbohydrate metabolism	Pyruvate metabolism I: anaplerotic reactions, PEP	Phosphoenolpyruvate carboxykinase [ATP] (EC 4.1.1.49)	<a href=&#39;?page=Annotation&feature=fig|59843.19.peg.433&#39; target=_blank>fig|59843.19.peg.433</a>	yes	<a href=&#39;?page=Annotation&feature=fig|6666666.640629.peg.684&#39; target=_blank>fig|6666666.640629.peg.684</a>	yes
A and B	Carbohydrates	Central carbohydrate metabolism	Pyruvate metabolism I: anaplerotic reactions, PEP	Phosphoenolpyruvate carboxylase (EC 4.1.1.31)	<a href=&#39;?page=Annotation&feature=fig|59843.19.peg.1342&#39; target=_blank>fig|59843.19.peg.1342</a>	yes	<a href=&#39;?page=Annotation&feature=fig|6666666.640629.peg.3182&#39; target=_blank>fig|6666666.640629.peg.3182</a>	yes
A and B	Carbohydrates	Central carbohydrate metabolism	Pyruvate metabolism I: anaplerotic reactions, PEP	Pyruvate kinase (EC 2.7.1.40)	<a href=&#39;?page=Annotation&feature=fig|59843.19.peg.506&#39; target=_blank>fig|59843.19.peg.506</a>, <a href=&#39;?page=Annotation&feature=fig|59843.19.peg.3073&#39; target=_blank>fig|59843.19.peg.3073</a>	yes	<a href=&#39;?page=Annotation&feature=fig|6666666.640629.peg.79&#39; target=_blank>fig|6666666.640629.peg.79</a>	yes
A and B	Carbohydrates	Central carbohydrate metabolism	Pyruvate metabolism I: anaplerotic reactions, PEP	Two-component response regulator, malate (EC 2.7.3.-)	<a href=&#39;?page=Annotation&feature=fig|59843.19.peg.1328&#39; target=_blank>fig|59843.19.peg.1328</a>	yes	<a href=&#39;?page=Annotation&feature=fig|6666666.640629.peg.1057&#39; target=_blank>fig|6666666.640629.peg.1057</a>, <a href=&#39;?page=Annotation&feature=fig|6666666.640629.peg.3611&#39; target=_blank>fig|6666666.640629.peg.3611</a>	yes
A and B	Carbohydrates	Central carbohydrate metabolism	Pyruvate metabolism II: acetyl-CoA, acetogenesis from pyruvate	Acetate kinase (EC 2.7.2.1)	<a href=&#39;?page=Annotation&feature=fig|59843.19.peg.4183&#39; target=_blank>fig|59843.19.peg.4183</a>	yes	<a href=&#39;?page=Annotation&feature=fig|6666666.640629.peg.53&#39; target=_blank>fig|6666666.640629.peg.53</a>	yes
A and B	Carbohydrates	Central carbohydrate metabolism	Pyruvate metabolism II: acetyl-CoA, acetogenesis from pyruvate	Acetyltransferase AcuA, acetyl-CoA synthetase inhibitor	<a href=&#39;?page=Annotation&feature=fig|59843.19.peg.3849&#39; target=_blank>fig|59843.19.peg.3849</a>	yes	<a href=&#39;?page=Annotation&feature=fig|6666666.640629.peg.39&#39; target=_blank>fig|6666666.640629.peg.39</a>	yes
A and B	Carbohydrates	Central carbohydrate metabolism	Pyruvate metabolism II: acetyl-CoA, acetogenesis from pyruvate	Aldehyde dehydrogenase (EC 1.2.1.3)	<a href=&#39;?page=Annotation&feature=fig|59843.19.peg.1036&#39; target=_blank>fig|59843.19.peg.1036</a>, <a href=&#39;?page=Annotation&feature=fig|59843.19.peg.1872&#39; target=_blank>fig|59843.19.peg.1872</a>, <a href=&#39;?page=Annotation&feature=fig|59843.19.peg.1873&#39; target=_blank>fig|59843.19.peg.1873</a>, <a href=&#39;?page=Annotation&feature=fig|59843.19.peg.4753&#39; target=_blank>fi…	yes	<a href=&#39;?page=Annotation&feature=fig|6666666.640629.peg.412&#39; target=_blank>fig|6666666.640629.peg.412</a>, <a href=&#39;?page=Annotation&feature=fig|6666666.640629.peg.699&#39; target=_blank>fig|6666666.640629.peg.699</a>, <a href=&#39;?page=Annotation&feature=fig|6666666.640629.peg.1048&#39; target=_blank>fig|6666666.640629.peg.1048</a>, <a href=&#39;?page=Annotation&feature=fig|6666666…	yes
A and B	Carbohydrates	Central carbohydrate metabolism	Pyruvate metabolism II: acetyl-CoA, acetogenesis from pyruvate	Dihydrolipoamide acetyltransferase component of pyruvate dehydrogenase complex (EC 2.3.1.12)	<a href=&#39;?page=Annotation&feature=fig|59843.19.peg.4341&#39; target=_blank>fig|59843.19.peg.4341</a>	yes	<a href=&#39;?page=Annotation&feature=fig|6666666.640629.peg.2252&#39; target=_blank>fig|6666666.640629.peg.2252</a>	yes
A and B	Carbohydrates	Central carbohydrate metabolism	Pyruvate metabolism II: acetyl-CoA, acetogenesis from pyruvate	Dihydrolipoamide dehydrogenase of pyruvate dehydrogenase complex (EC 1.8.1.4)	<a href=&#39;?page=Annotation&feature=fig|59843.19.peg.4342&#39; target=_blank>fig|59843.19.peg.4342</a>	yes	<a href=&#39;?page=Annotation&feature=fig|6666666.640629.peg.2253&#39; target=_blank>fig|6666666.640629.peg.2253</a>	yes
A and B	Carbohydrates	Central carbohydrate metabolism	Pyruvate metabolism II: acetyl-CoA, acetogenesis from pyruvate	NAD-dependent protein deacetylase of SIR2 family	<a href=&#39;?page=Annotation&feature=fig|59843.19.peg.3519&#39; target=_blank>fig|59843.19.peg.3519</a>	yes	<a href=&#39;?page=Annotation&feature=fig|6666666.640629.peg.2160&#39; target=_blank>fig|6666666.640629.peg.2160</a>	yes
A and B	Carbohydrates	Central carbohydrate metabolism	Pyruvate metabolism II: acetyl-CoA, acetogenesis from pyruvate	Pyruvate dehydrogenase E1 component alpha subunit (EC 1.2.4.1)	<a href=&#39;?page=Annotation&feature=fig|59843.19.peg.4339&#39; target=_blank>fig|59843.19.peg.4339</a>	yes	<a href=&#39;?page=Annotation&feature=fig|6666666.640629.peg.2250&#39; target=_blank>fig|6666666.640629.peg.2250</a>	yes
A and B	Carbohydrates	Central carbohydrate metabolism	Pyruvate metabolism II: acetyl-CoA, acetogenesis from pyruvate	Pyruvate dehydrogenase E1 component beta subunit (EC 1.2.4.1)	<a href=&#39;?page=Annotation&feature=fig|59843.19.peg.4340&#39; target=_blank>fig|59843.19.peg.4340</a>	yes	<a href=&#39;?page=Annotation&feature=fig|6666666.640629.peg.2251&#39; target=_blank>fig|6666666.640629.peg.2251</a>	yes
A and B	Carbohydrates	Central carbohydrate metabolism	TCA Cycle	2-oxoglutarate dehydrogenase E1 component (EC 1.2.4.2)	<a href=&#39;?page=Annotation&feature=fig|59843.19.peg.5299&#39; target=_blank>fig|59843.19.peg.5299</a>	yes	<a href=&#39;?page=Annotation&feature=fig|6666666.640629.peg.1291&#39; target=_blank>fig|6666666.640629.peg.1291</a>	yes
A and B	Carbohydrates	Central carbohydrate metabolism	TCA Cycle	Aconitate hydratase (EC 4.2.1.3)	<a href=&#39;?page=Annotation&feature=fig|59843.19.peg.2840&#39; target=_blank>fig|59843.19.peg.2840</a>	yes	<a href=&#39;?page=Annotation&feature=fig|6666666.640629.peg.3528&#39; target=_blank>fig|6666666.640629.peg.3528</a>, <a href=&#39;?page=Annotation&feature=fig|6666666.640629.peg.3867&#39; target=_blank>fig|6666666.640629.peg.3867</a>	yes
A and B	Carbohydrates	Central carbohydrate metabolism	TCA Cycle	Citrate synthase (si) (EC 2.3.3.1)	<a href=&#39;?page=Annotation&feature=fig|59843.19.peg.502&#39; target=_blank>fig|59843.19.peg.502</a>	yes	<a href=&#39;?page=Annotation&feature=fig|6666666.640629.peg.83&#39; target=_blank>fig|6666666.640629.peg.83</a>	yes
A and B	Carbohydrates	Central carbohydrate metabolism	TCA Cycle	Dihydrolipoamide dehydrogenase of pyruvate dehydrogenase complex (EC 1.8.1.4)	<a href=&#39;?page=Annotation&feature=fig|59843.19.peg.4342&#39; target=_blank>fig|59843.19.peg.4342</a>	yes	<a href=&#39;?page=Annotation&feature=fig|6666666.640629.peg.2253&#39; target=_blank>fig|6666666.640629.peg.2253</a>	yes
A and B	Carbohydrates	Central carbohydrate metabolism	TCA Cycle	Dihydrolipoamide succinyltransferase component (E2) of 2-oxoglutarate dehydrogenase complex (EC 2.3.1.61)	<a href=&#39;?page=Annotation&feature=fig|59843.19.peg.5298&#39; target=_blank>fig|59843.19.peg.5298</a>	yes	<a href=&#39;?page=Annotation&feature=fig|6666666.640629.peg.1292&#39; target=_blank>fig|6666666.640629.peg.1292</a>	yes
A and B	Carbohydrates	Central carbohydrate metabolism	TCA Cycle	Fumarate hydratase class II (EC 4.2.1.2)	<a href=&#39;?page=Annotation&feature=fig|59843.19.peg.1675&#39; target=_blank>fig|59843.19.peg.1675</a>	yes	<a href=&#39;?page=Annotation&feature=fig|6666666.640629.peg.1368&#39; target=_blank>fig|6666666.640629.peg.1368</a>	yes
A and B	Carbohydrates	Central carbohydrate metabolism	TCA Cycle	Isocitrate dehydrogenase [NADP] (EC 1.1.1.42)	<a href=&#39;?page=Annotation&feature=fig|59843.19.peg.501&#39; target=_blank>fig|59843.19.peg.501</a>	yes	<a href=&#39;?page=Annotation&feature=fig|6666666.640629.peg.84&#39; target=_blank>fig|6666666.640629.peg.84</a>	yes
A and B	Carbohydrates	Central carbohydrate metabolism	TCA Cycle	Malate dehydrogenase (EC 1.1.1.37)	<a href=&#39;?page=Annotation&feature=fig|59843.19.peg.500&#39; target=_blank>fig|59843.19.peg.500</a>	yes	<a href=&#39;?page=Annotation&feature=fig|6666666.640629.peg.85&#39; target=_blank>fig|6666666.640629.peg.85</a>	yes
A and B	Carbohydrates	Central carbohydrate metabolism	TCA Cycle	Malate:quinone oxidoreductase (EC 1.1.5.4)	<a href=&#39;?page=Annotation&feature=fig|59843.19.peg.1860&#39; target=_blank>fig|59843.19.peg.1860</a>	yes	<a href=&#39;?page=Annotation&feature=fig|6666666.640629.peg.2016&#39; target=_blank>fig|6666666.640629.peg.2016</a>, <a href=&#39;?page=Annotation&feature=fig|6666666.640629.peg.2814&#39; target=_blank>fig|6666666.640629.peg.2814</a>	yes
A and B	Carbohydrates	Central carbohydrate metabolism	TCA Cycle	Succinyl-CoA ligase [ADP-forming] alpha chain (EC 6.2.1.5)	<a href=&#39;?page=Annotation&feature=fig|59843.19.peg.5472&#39; target=_blank>fig|59843.19.peg.5472</a>	yes	<a href=&#39;?page=Annotation&feature=fig|6666666.640629.peg.3407&#39; target=_blank>fig|6666666.640629.peg.3407</a>	yes
A and B	Carbohydrates	Central carbohydrate metabolism	TCA Cycle	Succinyl-CoA ligase [ADP-forming] beta chain (EC 6.2.1.5)	<a href=&#39;?page=Annotation&feature=fig|59843.19.peg.5473&#39; target=_blank>fig|59843.19.peg.5473</a>	yes	<a href=&#39;?page=Annotation&feature=fig|6666666.640629.peg.3406&#39; target=_blank>fig|6666666.640629.peg.3406</a>	yes
A	Carbohydrates	Central carbohydrate metabolism	Dihydroxyacetone kinases	Dihydroxyacetone kinase, ATP-dependent (EC 2.7.1.29)	<a href=&#39;?page=Annotation&feature=fig|59843.19.peg.3919&#39; target=_blank>fig|59843.19.peg.3919</a>	yes	<input type=&#39;button&#39; class=&#39;button&#39; value=&#39;find&#39; onclick=&#39;window.open("?page=SearchGene&fr=Dihydroxyacetone kinase, ATP-dependent (EC 2.7.1.29)&organism=6666666.640629&subsystem=Dihydroxyacetone_kinases&template_gene=fig|59843.19.peg.3919");&#39;>	no
B	Carbohydrates	Central carbohydrate metabolism	Glycolate, glyoxylate interconversions	Glyoxylate reductase (EC 1.1.1.26)	<input type=&#39;button&#39; value=&#39;find&#39; onclick=&#39;window.open("?page=SearchGene&fr=Glyoxylate reductase (EC 1.1.1.26)&organism=59843.19&subsystem=Glycolate,_glyoxylate_interconversions&template_gene=fig|6666666.640629.peg.730");&#39;>	no	<a href=&#39;?page=Annotation&feature=fig|6666666.640629.peg.730&#39; target=_blank>fig|6666666.640629.peg.730</a>, <a href=&#39;?page=Annotation&feature=fig|6666666.640629.peg.1035&#39; target=_blank>fig|6666666.640629.peg.1035</a>	yes
B	Carbohydrates	Central carbohydrate metabolism	Glycolate, glyoxylate interconversions	Glyoxylate reductase (EC 1.1.1.79)	<input type=&#39;button&#39; value=&#39;find&#39; onclick=&#39;window.open("?page=SearchGene&fr=Glyoxylate reductase (EC 1.1.1.79)&organism=59843.19&subsystem=Glycolate,_glyoxylate_interconversions&template_gene=fig|6666666.640629.peg.730");&#39;>	no	<a href=&#39;?page=Annotation&feature=fig|6666666.640629.peg.730&#39; target=_blank>fig|6666666.640629.peg.730</a>, <a href=&#39;?page=Annotation&feature=fig|6666666.640629.peg.1035&#39; target=_blank>fig|6666666.640629.peg.1035</a>	yes
B	Carbohydrates	Central carbohydrate metabolism	Glycolysis and Gluconeogenesis	Fructose-1,6-bisphosphatase, Bacillus type (EC 3.1.3.11)	<input type=&#39;button&#39; value=&#39;find&#39; onclick=&#39;window.open("?page=SearchGene&fr=Fructose-1,6-bisphosphatase, Bacillus type (EC 3.1.3.11)&organism=59843.19&subsystem=Glycolysis_and_Gluconeogenesis&template_gene=fig|6666666.640629.peg.3620");&#39;>	no	<a href=&#39;?page=Annotation&feature=fig|6666666.640629.peg.3620&#39; target=_blank>fig|6666666.640629.peg.3620</a>	yes
B	Carbohydrates	Central carbohydrate metabolism	Glycolysis and Gluconeogenesis	Fructose-bisphosphate aldolase class I (EC 4.1.2.13)	<input type=&#39;button&#39; value=&#39;find&#39; onclick=&#39;window.open("?page=SearchGene&fr=Fructose-bisphosphate aldolase class I (EC 4.1.2.13)&organism=59843.19&subsystem=Glycolysis_and_Gluconeogenesis&template_gene=fig|6666666.640629.peg.1862");&#39;>	no	<a href=&#39;?page=Annotation&feature=fig|6666666.640629.peg.1862&#39; target=_blank>fig|6666666.640629.peg.1862</a>	yes
B	Carbohydrates	Central carbohydrate metabolism	Glyoxylate bypass	Isocitrate lyase (EC 4.1.3.1)	<input type=&#39;button&#39; value=&#39;find&#39; onclick=&#39;window.open("?page=SearchGene&fr=Isocitrate lyase (EC 4.1.3.1)&organism=59843.19&subsystem=Glyoxylate_bypass&template_gene=fig|6666666.640629.peg.786");&#39;>	no	<a href=&#39;?page=Annotation&feature=fig|6666666.640629.peg.786&#39; target=_blank>fig|6666666.640629.peg.786</a>	yes
B	Carbohydrates	Central carbohydrate metabolism	Glyoxylate bypass	Malate synthase (EC 2.3.3.9)	<input type=&#39;button&#39; value=&#39;find&#39; onclick=&#39;window.open("?page=SearchGene&fr=Malate synthase (EC 2.3.3.9)&organism=59843.19&subsystem=Glyoxylate_bypass&template_gene=fig|6666666.640629.peg.787");&#39;>	no	<a href=&#39;?page=Annotation&feature=fig|6666666.640629.peg.787&#39; target=_blank>fig|6666666.640629.peg.787</a>	yes
B	Carbohydrates	Central carbohydrate metabolism	Glyoxylate bypass	Malate synthase G (EC 2.3.3.9)	<input type=&#39;button&#39; value=&#39;find&#39; onclick=&#39;window.open("?page=SearchGene&fr=Malate synthase G (EC 2.3.3.9)&organism=59843.19&subsystem=Glyoxylate_bypass&template_gene=fig|6666666.640629.peg.1864");&#39;>	no	<a href=&#39;?page=Annotation&feature=fig|6666666.640629.peg.1864&#39; target=_blank>fig|6666666.640629.peg.1864</a>	yes
B	Carbohydrates	Central carbohydrate metabolism	Methylglyoxal Metabolism	Aldehyde dehydrogenase A (EC 1.2.1.22)	<input type=&#39;button&#39; value=&#39;find&#39; onclick=&#39;window.open("?page=SearchGene&fr=Aldehyde dehydrogenase A (EC 1.2.1.22)&organism=59843.19&subsystem=Methylglyoxal_Metabolism&template_gene=fig|6666666.640629.peg.1992");&#39;>	no	<a href=&#39;?page=Annotation&feature=fig|6666666.640629.peg.1992&#39; target=_blank>fig|6666666.640629.peg.1992</a>, <a href=&#39;?page=Annotation&feature=fig|6666666.640629.peg.2969&#39; target=_blank>fig|6666666.640629.peg.2969</a>	yes
B	Carbohydrates	Central carbohydrate metabolism	Methylglyoxal Metabolism	Aldehyde dehydrogenase B (EC 1.2.1.22)	<input type=&#39;button&#39; value=&#39;find&#39; onclick=&#39;window.open("?page=SearchGene&fr=Aldehyde dehydrogenase B (EC 1.2.1.22)&organism=59843.19&subsystem=Methylglyoxal_Metabolism&template_gene=fig|6666666.640629.peg.520");&#39;>	no	<a href=&#39;?page=Annotation&feature=fig|6666666.640629.peg.520&#39; target=_blank>fig|6666666.640629.peg.520</a>	yes
B	Carbohydrates	Central carbohydrate metabolism	Pyruvate Alanine Serine Interconversions	D-alanine aminotransferase (EC 2.6.1.21)	<input type=&#39;button&#39; value=&#39;find&#39; onclick=&#39;window.open("?page=SearchGene&fr=D-alanine aminotransferase (EC 2.6.1.21)&organism=59843.19&subsystem=Pyruvate_Alanine_Serine_Interconversions&template_gene=fig|6666666.640629.peg.1331");&#39;>	no	<a href=&#39;?page=Annotation&feature=fig|6666666.640629.peg.1331&#39; target=_blank>fig|6666666.640629.peg.1331</a>	yes
B	Carbohydrates	Central carbohydrate metabolism	Pyruvate metabolism II: acetyl-CoA, acetogenesis from pyruvate	NAD-independent protein deacetylase AcuC	<input type=&#39;button&#39; value=&#39;find&#39; onclick=&#39;window.open("?page=SearchGene&fr=NAD-independent protein deacetylase AcuC&organism=59843.19&subsystem=Pyruvate_metabolism_II:_acetyl-CoA,_acetogenesis_from_pyruvate&template_gene=fig|6666666.640629.peg.37");&#39;>	no	<a href=&#39;?page=Annotation&feature=fig|6666666.640629.peg.37&#39; target=_blank>fig|6666666.640629.peg.37</a>	yes
A and B	Carbohydrates	Di- and oligosaccharides	Lactose and Galactose Uptake and Utilization	Galactokinase (EC 2.7.1.6)	<a href=&#39;?page=Annotation&feature=fig|59843.19.peg.3522&#39; target=_blank>fig|59843.19.peg.3522</a>	yes	<a href=&#39;?page=Annotation&feature=fig|6666666.640629.peg.1139&#39; target=_blank>fig|6666666.640629.peg.1139</a>	yes
A and B	Carbohydrates	Di- and oligosaccharides	Lactose and Galactose Uptake and Utilization	Galactose-1-phosphate uridylyltransferase (EC 2.7.7.10)	<a href=&#39;?page=Annotation&feature=fig|59843.19.peg.3524&#39; target=_blank>fig|59843.19.peg.3524</a>	yes	<a href=&#39;?page=Annotation&feature=fig|6666666.640629.peg.1137&#39; target=_blank>fig|6666666.640629.peg.1137</a>	yes
A and B	Carbohydrates	Di- and oligosaccharides	Lactose and Galactose Uptake and Utilization	UDP-glucose 4-epimerase (EC 5.1.3.2)	<a href=&#39;?page=Annotation&feature=fig|59843.19.peg.1459&#39; target=_blank>fig|59843.19.peg.1459</a>, <a href=&#39;?page=Annotation&feature=fig|59843.19.peg.3362&#39; target=_blank>fig|59843.19.peg.3362</a>, <a href=&#39;?page=Annotation&feature=fig|59843.19.peg.3523&#39; target=_blank>fig|59843.19.peg.3523</a>, <a href=&#39;?page=Annotation&feature=fig|59843.19.peg.4419&#39; target=_blank>fi…	yes	<a href=&#39;?page=Annotation&feature=fig|6666666.640629.peg.1138&#39; target=_blank>fig|6666666.640629.peg.1138</a>, <a href=&#39;?page=Annotation&feature=fig|6666666.640629.peg.1832&#39; target=_blank>fig|6666666.640629.peg.1832</a>, <a href=&#39;?page=Annotation&feature=fig|6666666.640629.peg.2617&#39; target=_blank>fig|6666666.640629.peg.2617</a>	yes
A and B	Carbohydrates	Di- and oligosaccharides	Sucrose utilization	Fructokinase (EC 2.7.1.4)	<a href=&#39;?page=Annotation&feature=fig|59843.19.peg.681&#39; target=_blank>fig|59843.19.peg.681</a>	yes	<a href=&#39;?page=Annotation&feature=fig|6666666.640629.peg.2788&#39; target=_blank>fig|6666666.640629.peg.2788</a>	yes
A and B	Carbohydrates	Di- and oligosaccharides	Sucrose utilization	Sucrose-6-phosphate hydrolase (EC 3.2.1.26)	<a href=&#39;?page=Annotation&feature=fig|59843.19.peg.5112&#39; target=_blank>fig|59843.19.peg.5112</a>	yes	<a href=&#39;?page=Annotation&feature=fig|6666666.640629.peg.658&#39; target=_blank>fig|6666666.640629.peg.658</a>, <a href=&#39;?page=Annotation&feature=fig|6666666.640629.peg.2787&#39; target=_blank>fig|6666666.640629.peg.2787</a>, <a href=&#39;?page=Annotation&feature=fig|6666666.640629.peg.4359&#39; target=_blank>fig|6666666.640629.peg.4359</a>	yes
A	Carbohydrates	Di- and oligosaccharides	Sucrose utilization	Predicted sucrose permease, MFS family, FucP subfamily	<a href=&#39;?page=Annotation&feature=fig|59843.19.peg.5192&#39; target=_blank>fig|59843.19.peg.5192</a>	yes	<input type=&#39;button&#39; class=&#39;button&#39; value=&#39;find&#39; onclick=&#39;window.open("?page=SearchGene&fr=Predicted sucrose permease, MFS family, FucP subfamily&organism=6666666.640629&subsystem=Sucrose_utilization&template_gene=fig|59843.19.peg.5192");&#39;>	no
A	Carbohydrates	Di- and oligosaccharides	Sucrose utilization	Sucrose operon repressor ScrR, LacI family	<a href=&#39;?page=Annotation&feature=fig|59843.19.peg.5113&#39; target=_blank>fig|59843.19.peg.5113</a>	yes	<input type=&#39;button&#39; class=&#39;button&#39; value=&#39;find&#39; onclick=&#39;window.open("?page=SearchGene&fr=Sucrose operon repressor ScrR, LacI family&organism=6666666.640629&subsystem=Sucrose_utilization&template_gene=fig|59843.19.peg.5113");&#39;>	no
A	Carbohydrates	Di- and oligosaccharides	Trehalose Biosynthesis	Trehalose phosphorylase (EC 2.4.1.64)	<a href=&#39;?page=Annotation&feature=fig|59843.19.peg.2351&#39; target=_blank>fig|59843.19.peg.2351</a>	yes	<input type=&#39;button&#39; class=&#39;button&#39; value=&#39;find&#39; onclick=&#39;window.open("?page=SearchGene&fr=Trehalose phosphorylase (EC 2.4.1.64)&organism=6666666.640629&subsystem=Trehalose_Biosynthesis&template_gene=fig|59843.19.peg.2351");&#39;>	no
A	Carbohydrates	Di- and oligosaccharides	Trehalose Biosynthesis	Trehalose synthase (EC 5.4.99.16)	<a href=&#39;?page=Annotation&feature=fig|59843.19.peg.2609&#39; target=_blank>fig|59843.19.peg.2609</a>	yes	<input type=&#39;button&#39; class=&#39;button&#39; value=&#39;find&#39; onclick=&#39;window.open("?page=SearchGene&fr=Trehalose synthase (EC 5.4.99.16)&organism=6666666.640629&subsystem=Trehalose_Biosynthesis&template_gene=fig|59843.19.peg.2609");&#39;>	no
B	Carbohydrates	Di- and oligosaccharides	Lactose and Galactose Uptake and Utilization	Aldose 1-epimerase (EC 5.1.3.3)	<input type=&#39;button&#39; value=&#39;find&#39; onclick=&#39;window.open("?page=SearchGene&fr=Aldose 1-epimerase (EC 5.1.3.3)&organism=59843.19&subsystem=Lactose_and_Galactose_Uptake_and_Utilization&template_gene=fig|6666666.640629.peg.1008");&#39;>	no	<a href=&#39;?page=Annotation&feature=fig|6666666.640629.peg.1008&#39; target=_blank>fig|6666666.640629.peg.1008</a>	yes
B	Carbohydrates	Di- and oligosaccharides	Maltose and Maltodextrin Utilization	ABC-type sugar transport system, periplasmic binding protein YcjN	<input type=&#39;button&#39; value=&#39;find&#39; onclick=&#39;window.open("?page=SearchGene&fr=ABC-type sugar transport system, periplasmic binding protein YcjN&organism=59843.19&subsystem=Maltose_and_Maltodextrin_Utilization&template_gene=fig|6666666.640629.peg.4085");&#39;>	no	<a href=&#39;?page=Annotation&feature=fig|6666666.640629.peg.4085&#39; target=_blank>fig|6666666.640629.peg.4085</a>	yes
B	Carbohydrates	Di- and oligosaccharides	Maltose and Maltodextrin Utilization	Alpha-amylase (EC 3.2.1.1)	<input type=&#39;button&#39; value=&#39;find&#39; onclick=&#39;window.open("?page=SearchGene&fr=Alpha-amylase (EC 3.2.1.1)&organism=59843.19&subsystem=Maltose_and_Maltodextrin_Utilization&template_gene=fig|6666666.640629.peg.2694");&#39;>	no	<a href=&#39;?page=Annotation&feature=fig|6666666.640629.peg.2694&#39; target=_blank>fig|6666666.640629.peg.2694</a>	yes
B	Carbohydrates	Di- and oligosaccharides	Maltose and Maltodextrin Utilization	Inner membrane ABC transporter permease protein YcjO	<input type=&#39;button&#39; value=&#39;find&#39; onclick=&#39;window.open("?page=SearchGene&fr=Inner membrane ABC transporter permease protein YcjO&organism=59843.19&subsystem=Maltose_and_Maltodextrin_Utilization&template_gene=fig|6666666.640629.peg.4086");&#39;>	no	<a href=&#39;?page=Annotation&feature=fig|6666666.640629.peg.4086&#39; target=_blank>fig|6666666.640629.peg.4086</a>	yes
B	Carbohydrates	Di- and oligosaccharides	Maltose and Maltodextrin Utilization	Inner membrane ABC transporter permease protein YcjP	<input type=&#39;button&#39; value=&#39;find&#39; onclick=&#39;window.open("?page=SearchGene&fr=Inner membrane ABC transporter permease protein YcjP&organism=59843.19&subsystem=Maltose_and_Maltodextrin_Utilization&template_gene=fig|6666666.640629.peg.4087");&#39;>	no	<a href=&#39;?page=Annotation&feature=fig|6666666.640629.peg.4087&#39; target=_blank>fig|6666666.640629.peg.4087</a>	yes
B	Carbohydrates	Di- and oligosaccharides	Maltose and Maltodextrin Utilization	Maltodextrin glucosidase (EC 3.2.1.20)	<input type=&#39;button&#39; value=&#39;find&#39; onclick=&#39;window.open("?page=SearchGene&fr=Maltodextrin glucosidase (EC 3.2.1.20)&organism=59843.19&subsystem=Maltose_and_Maltodextrin_Utilization&template_gene=fig|6666666.640629.peg.1129");&#39;>	no	<a href=&#39;?page=Annotation&feature=fig|6666666.640629.peg.1129&#39; target=_blank>fig|6666666.640629.peg.1129</a>	yes
B	Carbohydrates	Di- and oligosaccharides	Maltose and Maltodextrin Utilization	Maltose O-acetyltransferase (EC 2.3.1.79)	<input type=&#39;button&#39; value=&#39;find&#39; onclick=&#39;window.open("?page=SearchGene&fr=Maltose O-acetyltransferase (EC 2.3.1.79)&organism=59843.19&subsystem=Maltose_and_Maltodextrin_Utilization&template_gene=fig|6666666.640629.peg.1347");&#39;>	no	<a href=&#39;?page=Annotation&feature=fig|6666666.640629.peg.1347&#39; target=_blank>fig|6666666.640629.peg.1347</a>	yes
B	Carbohydrates	Di- and oligosaccharides	Maltose and Maltodextrin Utilization	Oligo-1,6-glucosidase (EC 3.2.1.10)	<input type=&#39;button&#39; value=&#39;find&#39; onclick=&#39;window.open("?page=SearchGene&fr=Oligo-1,6-glucosidase (EC 3.2.1.10)&organism=59843.19&subsystem=Maltose_and_Maltodextrin_Utilization&template_gene=fig|6666666.640629.peg.989");&#39;>	no	<a href=&#39;?page=Annotation&feature=fig|6666666.640629.peg.989&#39; target=_blank>fig|6666666.640629.peg.989</a>	yes
B	Carbohydrates	Di- and oligosaccharides	Maltose and Maltodextrin Utilization	Putative oxidoreductase YcjS (EC 1.-.-.-), NADH-binding	<input type=&#39;button&#39; value=&#39;find&#39; onclick=&#39;window.open("?page=SearchGene&fr=Putative oxidoreductase YcjS (EC 1.-.-.-), NADH-binding&organism=59843.19&subsystem=Maltose_and_Maltodextrin_Utilization&template_gene=fig|6666666.640629.peg.4090");&#39;>	no	<a href=&#39;?page=Annotation&feature=fig|6666666.640629.peg.4090&#39; target=_blank>fig|6666666.640629.peg.4090</a>	yes
B	Carbohydrates	Di- and oligosaccharides	Maltose and Maltodextrin Utilization	Sugar phosphate isomerases/epimerases family protein YcjR	<input type=&#39;button&#39; value=&#39;find&#39; onclick=&#39;window.open("?page=SearchGene&fr=Sugar phosphate isomerases/epimerases family protein YcjR&organism=59843.19&subsystem=Maltose_and_Maltodextrin_Utilization&template_gene=fig|6666666.640629.peg.4089");&#39;>	no	<a href=&#39;?page=Annotation&feature=fig|6666666.640629.peg.4089&#39; target=_blank>fig|6666666.640629.peg.4089</a>	yes
B	Carbohydrates	Di- and oligosaccharides	Maltose and Maltodextrin Utilization	Transcriptional regulator YcjW, LacI family, possibly involved in maltodextrin utilization pathway	<input type=&#39;button&#39; value=&#39;find&#39; onclick=&#39;window.open("?page=SearchGene&fr=Transcriptional regulator YcjW, LacI family, possibly involved in maltodextrin utilization pathway&organism=59843.19&subsystem=Maltose_and_Maltodextrin_Utilization&template_gene=fig|6666666.640629.peg.4084");&#39;>	no	<a href=&#39;?page=Annotation&feature=fig|6666666.640629.peg.4084&#39; target=_blank>fig|6666666.640629.peg.4084</a>	yes
B	Carbohydrates	Di- and oligosaccharides	Maltose and Maltodextrin Utilization	Zinc-type alcohol dehydrogenase YcjQ	<input type=&#39;button&#39; value=&#39;find&#39; onclick=&#39;window.open("?page=SearchGene&fr=Zinc-type alcohol dehydrogenase YcjQ&organism=59843.19&subsystem=Maltose_and_Maltodextrin_Utilization&template_gene=fig|6666666.640629.peg.4088");&#39;>	no	<a href=&#39;?page=Annotation&feature=fig|6666666.640629.peg.4088&#39; target=_blank>fig|6666666.640629.peg.4088</a>	yes
B	Carbohydrates	Di- and oligosaccharides	Sucrose utilization	Sucrose phosphorylase (EC 2.4.1.7)	<input type=&#39;button&#39; value=&#39;find&#39; onclick=&#39;window.open("?page=SearchGene&fr=Sucrose phosphorylase (EC 2.4.1.7)&organism=59843.19&subsystem=Sucrose_utilization&template_gene=fig|6666666.640629.peg.1444");&#39;>	no	<a href=&#39;?page=Annotation&feature=fig|6666666.640629.peg.1444&#39; target=_blank>fig|6666666.640629.peg.1444</a>	yes
A and B	Carbohydrates	Fermentation	Acetoin, butanediol metabolism	Acetolactate synthase large subunit (EC 2.2.1.6)	<a href=&#39;?page=Annotation&feature=fig|59843.19.peg.723&#39; target=_blank>fig|59843.19.peg.723</a>	yes	<a href=&#39;?page=Annotation&feature=fig|6666666.640629.peg.1534&#39; target=_blank>fig|6666666.640629.peg.1534</a>	yes
A and B	Carbohydrates	Fermentation	Acetoin, butanediol metabolism	Acetolactate synthase small subunit (EC 2.2.1.6)	<a href=&#39;?page=Annotation&feature=fig|59843.19.peg.722&#39; target=_blank>fig|59843.19.peg.722</a>	yes	<a href=&#39;?page=Annotation&feature=fig|6666666.640629.peg.1535&#39; target=_blank>fig|6666666.640629.peg.1535</a>	yes
A and B	Carbohydrates	Fermentation	Acetolactate synthase subunits	Acetolactate synthase large subunit (EC 2.2.1.6)	<a href=&#39;?page=Annotation&feature=fig|59843.19.peg.723&#39; target=_blank>fig|59843.19.peg.723</a>	yes	<a href=&#39;?page=Annotation&feature=fig|6666666.640629.peg.1534&#39; target=_blank>fig|6666666.640629.peg.1534</a>	yes
A and B	Carbohydrates	Fermentation	Acetolactate synthase subunits	Acetolactate synthase small subunit (EC 2.2.1.6)	<a href=&#39;?page=Annotation&feature=fig|59843.19.peg.722&#39; target=_blank>fig|59843.19.peg.722</a>	yes	<a href=&#39;?page=Annotation&feature=fig|6666666.640629.peg.1535&#39; target=_blank>fig|6666666.640629.peg.1535</a>	yes
A and B	Carbohydrates	Fermentation	Fermentations: Lactate	Acetate kinase (EC 2.7.2.1)	<a href=&#39;?page=Annotation&feature=fig|59843.19.peg.4183&#39; target=_blank>fig|59843.19.peg.4183</a>	yes	<a href=&#39;?page=Annotation&feature=fig|6666666.640629.peg.53&#39; target=_blank>fig|6666666.640629.peg.53</a>	yes
A and B	Carbohydrates	Fermentation	Fermentations: Lactate	L-lactate dehydrogenase (EC 1.1.1.27)	<a href=&#39;?page=Annotation&feature=fig|59843.19.peg.4845&#39; target=_blank>fig|59843.19.peg.4845</a>	yes	<a href=&#39;?page=Annotation&feature=fig|6666666.640629.peg.321&#39; target=_blank>fig|6666666.640629.peg.321</a>	yes
A	Carbohydrates	Fermentation	Acetoin, butanediol metabolism	2,3-butanediol dehydrogenase, R-alcohol forming, (R)- and (S)-acetoin-specific (EC 1.1.1.4)	<a href=&#39;?page=Annotation&feature=fig|59843.19.peg.592&#39; target=_blank>fig|59843.19.peg.592</a>	yes	<input type=&#39;button&#39; class=&#39;button&#39; value=&#39;find&#39; onclick=&#39;window.open("?page=SearchGene&fr=2,3-butanediol dehydrogenase, R-alcohol forming, (R)- and (S)-acetoin-specific (EC 1.1.1.4)&organism=6666666.640629&subsystem=Acetoin,_butanediol_metabolism&template_gene=fig|59843.19.peg.592");&#39;>	no
A	Carbohydrates	Fermentation	Fermentations: Lactate	Acetaldehyde dehydrogenase (EC 1.2.1.10)	<a href=&#39;?page=Annotation&feature=fig|59843.19.peg.3994&#39; target=_blank>fig|59843.19.peg.3994</a>	yes	<input type=&#39;button&#39; class=&#39;button&#39; value=&#39;find&#39; onclick=&#39;window.open("?page=SearchGene&fr=Acetaldehyde dehydrogenase (EC 1.2.1.10)&organism=6666666.640629&subsystem=Fermentations:_Lactate&template_gene=fig|59843.19.peg.3994");&#39;>	no
A	Carbohydrates	Fermentation	Fermentations: Mixed acid	Pyruvate formate-lyase (EC 2.3.1.54)	<a href=&#39;?page=Annotation&feature=fig|59843.19.peg.3995&#39; target=_blank>fig|59843.19.peg.3995</a>	yes	<input type=&#39;button&#39; class=&#39;button&#39; value=&#39;find&#39; onclick=&#39;window.open("?page=SearchGene&fr=Pyruvate formate-lyase (EC 2.3.1.54)&organism=6666666.640629&subsystem=Fermentations:_Mixed_acid&template_gene=fig|59843.19.peg.3995");&#39;>	no
A	Carbohydrates	Fermentation	Fermentations: Mixed acid	Pyruvate formate-lyase activating enzyme (EC 1.97.1.4)	<a href=&#39;?page=Annotation&feature=fig|59843.19.peg.3996&#39; target=_blank>fig|59843.19.peg.3996</a>	yes	<input type=&#39;button&#39; class=&#39;button&#39; value=&#39;find&#39; onclick=&#39;window.open("?page=SearchGene&fr=Pyruvate formate-lyase activating enzyme (EC 1.97.1.4)&organism=6666666.640629&subsystem=Fermentations:_Mixed_acid&template_gene=fig|59843.19.peg.3996");&#39;>	no
B	Carbohydrates	Fermentation	Acetoin, butanediol metabolism	2,3-butanediol dehydrogenase, S-alcohol forming, (S)-acetoin-specific (EC 1.1.1.76)	<input type=&#39;button&#39; value=&#39;find&#39; onclick=&#39;window.open("?page=SearchGene&fr=2,3-butanediol dehydrogenase, S-alcohol forming, (S)-acetoin-specific (EC 1.1.1.76)&organism=59843.19&subsystem=Acetoin,_butanediol_metabolism&template_gene=fig|6666666.640629.peg.3793");&#39;>	no	<a href=&#39;?page=Annotation&feature=fig|6666666.640629.peg.3793&#39; target=_blank>fig|6666666.640629.peg.3793</a>	yes
B	Carbohydrates	Fermentation	Acetyl-CoA fermentation to Butyrate	3-hydroxybutyrate dehydrogenase (EC 1.1.1.30)	<input type=&#39;button&#39; value=&#39;find&#39; onclick=&#39;window.open("?page=SearchGene&fr=3-hydroxybutyrate dehydrogenase (EC 1.1.1.30)&organism=59843.19&subsystem=Acetyl-CoA_fermentation_to_Butyrate&template_gene=fig|6666666.640629.peg.2854");&#39;>	no	<a href=&#39;?page=Annotation&feature=fig|6666666.640629.peg.2854&#39; target=_blank>fig|6666666.640629.peg.2854</a>	yes
B	Carbohydrates	Fermentation	Acetyl-CoA fermentation to Butyrate	Acetyl-CoA acetyltransferase (EC 2.3.1.9)	<input type=&#39;button&#39; value=&#39;find&#39; onclick=&#39;window.open("?page=SearchGene&fr=Acetyl-CoA acetyltransferase (EC 2.3.1.9)&organism=59843.19&subsystem=Acetyl-CoA_fermentation_to_Butyrate&template_gene=fig|6666666.640629.peg.1067");&#39;>	no	<a href=&#39;?page=Annotation&feature=fig|6666666.640629.peg.1067&#39; target=_blank>fig|6666666.640629.peg.1067</a>, <a href=&#39;?page=Annotation&feature=fig|6666666.640629.peg.1090&#39; target=_blank>fig|6666666.640629.peg.1090</a>, <a href=&#39;?page=Annotation&feature=fig|6666666.640629.peg.1104&#39; target=_blank>fig|6666666.640629.peg.1104</a>, <a href=&#39;?page=Annotation&feature=fig|666…	yes
B	Carbohydrates	Fermentation	Acetyl-CoA fermentation to Butyrate	Enoyl-CoA hydratase (EC 4.2.1.17)	<input type=&#39;button&#39; value=&#39;find&#39; onclick=&#39;window.open("?page=SearchGene&fr=Enoyl-CoA hydratase (EC 4.2.1.17)&organism=59843.19&subsystem=Acetyl-CoA_fermentation_to_Butyrate&template_gene=fig|6666666.640629.peg.125");&#39;>	no	<a href=&#39;?page=Annotation&feature=fig|6666666.640629.peg.125&#39; target=_blank>fig|6666666.640629.peg.125</a>, <a href=&#39;?page=Annotation&feature=fig|6666666.640629.peg.1065&#39; target=_blank>fig|6666666.640629.peg.1065</a>, <a href=&#39;?page=Annotation&feature=fig|6666666.640629.peg.1380&#39; target=_blank>fig|6666666.640629.peg.1380</a>, <a href=&#39;?page=Annotation&feature=fig|66666…	yes
B	Carbohydrates	Fermentation	Fermentations: Lactate	Phosphate acetyltransferase (EC 2.3.1.8)	<input type=&#39;button&#39; value=&#39;find&#39; onclick=&#39;window.open("?page=SearchGene&fr=Phosphate acetyltransferase (EC 2.3.1.8)&organism=59843.19&subsystem=Fermentations:_Lactate&template_gene=fig|6666666.640629.peg.4370");&#39;>	no	<a href=&#39;?page=Annotation&feature=fig|6666666.640629.peg.4370&#39; target=_blank>fig|6666666.640629.peg.4370</a>	yes
A and B	Carbohydrates	Monosaccharides	D-Galacturonate and D-Glucuronate Utilization	2-dehydro-3-deoxy-D-gluconate 5-dehydrogenase (EC 1.1.1.127)	<a href=&#39;?page=Annotation&feature=fig|59843.19.peg.3535&#39; target=_blank>fig|59843.19.peg.3535</a>	yes	<a href=&#39;?page=Annotation&feature=fig|6666666.640629.peg.1115&#39; target=_blank>fig|6666666.640629.peg.1115</a>, <a href=&#39;?page=Annotation&feature=fig|6666666.640629.peg.2006&#39; target=_blank>fig|6666666.640629.peg.2006</a>, <a href=&#39;?page=Annotation&feature=fig|6666666.640629.peg.2916&#39; target=_blank>fig|6666666.640629.peg.2916</a>	yes
A and B	Carbohydrates	Monosaccharides	D-Galacturonate and D-Glucuronate Utilization	2-dehydro-3-deoxyphosphogluconate aldolase (EC 4.1.2.14)	<a href=&#39;?page=Annotation&feature=fig|59843.19.peg.47&#39; target=_blank>fig|59843.19.peg.47</a>, <a href=&#39;?page=Annotation&feature=fig|59843.19.peg.619&#39; target=_blank>fig|59843.19.peg.619</a>, <a href=&#39;?page=Annotation&feature=fig|59843.19.peg.1188&#39; target=_blank>fig|59843.19.peg.1188</a>	yes	<a href=&#39;?page=Annotation&feature=fig|6666666.640629.peg.878&#39; target=_blank>fig|6666666.640629.peg.878</a>, <a href=&#39;?page=Annotation&feature=fig|6666666.640629.peg.1132&#39; target=_blank>fig|6666666.640629.peg.1132</a>, <a href=&#39;?page=Annotation&feature=fig|6666666.640629.peg.2001&#39; target=_blank>fig|6666666.640629.peg.2001</a>	yes
A and B	Carbohydrates	Monosaccharides	D-Galacturonate and D-Glucuronate Utilization	2-deoxy-D-gluconate 3-dehydrogenase (EC 1.1.1.125)	<a href=&#39;?page=Annotation&feature=fig|59843.19.peg.3535&#39; target=_blank>fig|59843.19.peg.3535</a>	yes	<a href=&#39;?page=Annotation&feature=fig|6666666.640629.peg.1115&#39; target=_blank>fig|6666666.640629.peg.1115</a>, <a href=&#39;?page=Annotation&feature=fig|6666666.640629.peg.2006&#39; target=_blank>fig|6666666.640629.peg.2006</a>, <a href=&#39;?page=Annotation&feature=fig|6666666.640629.peg.2916&#39; target=_blank>fig|6666666.640629.peg.2916</a>	yes
A and B	Carbohydrates	Monosaccharides	D-Galacturonate and D-Glucuronate Utilization	4-deoxy-L-threo-5-hexosulose-uronate ketol-isomerase (EC 5.3.1.17)	<a href=&#39;?page=Annotation&feature=fig|59843.19.peg.3537&#39; target=_blank>fig|59843.19.peg.3537</a>	yes	<a href=&#39;?page=Annotation&feature=fig|6666666.640629.peg.1114&#39; target=_blank>fig|6666666.640629.peg.1114</a>, <a href=&#39;?page=Annotation&feature=fig|6666666.640629.peg.2005&#39; target=_blank>fig|6666666.640629.peg.2005</a>	yes
A and B	Carbohydrates	Monosaccharides	D-Galacturonate and D-Glucuronate Utilization	Alpha-glucosidase (EC 3.2.1.20)	<a href=&#39;?page=Annotation&feature=fig|59843.19.peg.2222&#39; target=_blank>fig|59843.19.peg.2222</a>, <a href=&#39;?page=Annotation&feature=fig|59843.19.peg.2678&#39; target=_blank>fig|59843.19.peg.2678</a>	yes	<a href=&#39;?page=Annotation&feature=fig|6666666.640629.peg.1602&#39; target=_blank>fig|6666666.640629.peg.1602</a>, <a href=&#39;?page=Annotation&feature=fig|6666666.640629.peg.4251&#39; target=_blank>fig|6666666.640629.peg.4251</a>	yes
A and B	Carbohydrates	Monosaccharides	D-Galacturonate and D-Glucuronate Utilization	Altronate oxidoreductase (EC 1.1.1.58)	<a href=&#39;?page=Annotation&feature=fig|59843.19.peg.5393&#39; target=_blank>fig|59843.19.peg.5393</a>	yes	<a href=&#39;?page=Annotation&feature=fig|6666666.640629.peg.1135&#39; target=_blank>fig|6666666.640629.peg.1135</a>	yes
A and B	Carbohydrates	Monosaccharides	D-Galacturonate and D-Glucuronate Utilization	Uronate isomerase (EC 5.3.1.12)	<a href=&#39;?page=Annotation&feature=fig|59843.19.peg.1759&#39; target=_blank>fig|59843.19.peg.1759</a>, <a href=&#39;?page=Annotation&feature=fig|59843.19.peg.5394&#39; target=_blank>fig|59843.19.peg.5394</a>	yes	<a href=&#39;?page=Annotation&feature=fig|6666666.640629.peg.1134&#39; target=_blank>fig|6666666.640629.peg.1134</a>	yes
A and B	Carbohydrates	Monosaccharides	D-galactarate, D-glucarate and D-glycerate catabolism	2-hydroxy-3-oxopropionate reductase (EC 1.1.1.60)	<a href=&#39;?page=Annotation&feature=fig|59843.19.peg.3592&#39; target=_blank>fig|59843.19.peg.3592</a>	yes	<a href=&#39;?page=Annotation&feature=fig|6666666.640629.peg.3592&#39; target=_blank>fig|6666666.640629.peg.3592</a>	yes
A and B	Carbohydrates	Monosaccharides	D-galactarate, D-glucarate and D-glycerate catabolism	D-glycerate transporter (predicted)	<a href=&#39;?page=Annotation&feature=fig|59843.19.peg.1732&#39; target=_blank>fig|59843.19.peg.1732</a>	yes	<a href=&#39;?page=Annotation&feature=fig|6666666.640629.peg.996&#39; target=_blank>fig|6666666.640629.peg.996</a>	yes
A and B	Carbohydrates	Monosaccharides	D-galactarate, D-glucarate and D-glycerate catabolism	Glycerate kinase (EC 2.7.1.31)	<a href=&#39;?page=Annotation&feature=fig|59843.19.peg.951&#39; target=_blank>fig|59843.19.peg.951</a>, <a href=&#39;?page=Annotation&feature=fig|59843.19.peg.1177&#39; target=_blank>fig|59843.19.peg.1177</a>, <a href=&#39;?page=Annotation&feature=fig|59843.19.peg.1540&#39; target=_blank>fig|59843.19.peg.1540</a>, <a href=&#39;?page=Annotation&feature=fig|59843.19.peg.1731&#39; target=_blank>fig|…	yes	<a href=&#39;?page=Annotation&feature=fig|6666666.640629.peg.995&#39; target=_blank>fig|6666666.640629.peg.995</a>, <a href=&#39;?page=Annotation&feature=fig|6666666.640629.peg.4094&#39; target=_blank>fig|6666666.640629.peg.4094</a>	yes
A and B	Carbohydrates	Monosaccharides	D-galactarate, D-glucarate and D-glycerate catabolism - gjo	2-hydroxy-3-oxopropionate reductase (EC 1.1.1.60)	<a href=&#39;?page=Annotation&feature=fig|59843.19.peg.3592&#39; target=_blank>fig|59843.19.peg.3592</a>	yes	<a href=&#39;?page=Annotation&feature=fig|6666666.640629.peg.3592&#39; target=_blank>fig|6666666.640629.peg.3592</a>	yes
A and B	Carbohydrates	Monosaccharides	D-galactarate, D-glucarate and D-glycerate catabolism - gjo	D-glycerate transporter (predicted)	<a href=&#39;?page=Annotation&feature=fig|59843.19.peg.1732&#39; target=_blank>fig|59843.19.peg.1732</a>	yes	<a href=&#39;?page=Annotation&feature=fig|6666666.640629.peg.996&#39; target=_blank>fig|6666666.640629.peg.996</a>	yes
A and B	Carbohydrates	Monosaccharides	D-galactarate, D-glucarate and D-glycerate catabolism - gjo	Glycerate kinase (EC 2.7.1.31)	<a href=&#39;?page=Annotation&feature=fig|59843.19.peg.951&#39; target=_blank>fig|59843.19.peg.951</a>, <a href=&#39;?page=Annotation&feature=fig|59843.19.peg.1177&#39; target=_blank>fig|59843.19.peg.1177</a>, <a href=&#39;?page=Annotation&feature=fig|59843.19.peg.1540&#39; target=_blank>fig|59843.19.peg.1540</a>, <a href=&#39;?page=Annotation&feature=fig|59843.19.peg.1731&#39; target=_blank>fig|…	yes	<a href=&#39;?page=Annotation&feature=fig|6666666.640629.peg.995&#39; target=_blank>fig|6666666.640629.peg.995</a>, <a href=&#39;?page=Annotation&feature=fig|6666666.640629.peg.4094&#39; target=_blank>fig|6666666.640629.peg.4094</a>	yes
A and B	Carbohydrates	Monosaccharides	D-gluconate and ketogluconates metabolism	6-phosphogluconate dehydrogenase, decarboxylating (EC 1.1.1.44)	<a href=&#39;?page=Annotation&feature=fig|59843.19.peg.1977&#39; target=_blank>fig|59843.19.peg.1977</a>, <a href=&#39;?page=Annotation&feature=fig|59843.19.peg.2377&#39; target=_blank>fig|59843.19.peg.2377</a>, <a href=&#39;?page=Annotation&feature=fig|59843.19.peg.3836&#39; target=_blank>fig|59843.19.peg.3836</a>	yes	<a href=&#39;?page=Annotation&feature=fig|6666666.640629.peg.1005&#39; target=_blank>fig|6666666.640629.peg.1005</a>	yes
A and B	Carbohydrates	Monosaccharides	D-gluconate and ketogluconates metabolism	Gluconate operon transcriptional repressor	<a href=&#39;?page=Annotation&feature=fig|59843.19.peg.1978&#39; target=_blank>fig|59843.19.peg.1978</a>	yes	<a href=&#39;?page=Annotation&feature=fig|6666666.640629.peg.2037&#39; target=_blank>fig|6666666.640629.peg.2037</a>	yes
A and B	Carbohydrates	Monosaccharides	D-gluconate and ketogluconates metabolism	Gluconokinase (EC 2.7.1.12)	<a href=&#39;?page=Annotation&feature=fig|59843.19.peg.1980&#39; target=_blank>fig|59843.19.peg.1980</a>, <a href=&#39;?page=Annotation&feature=fig|59843.19.peg.3623&#39; target=_blank>fig|59843.19.peg.3623</a>	yes	<a href=&#39;?page=Annotation&feature=fig|6666666.640629.peg.2036&#39; target=_blank>fig|6666666.640629.peg.2036</a>, <a href=&#39;?page=Annotation&feature=fig|6666666.640629.peg.3102&#39; target=_blank>fig|6666666.640629.peg.3102</a>	yes
A and B	Carbohydrates	Monosaccharides	D-ribose utilization	Ribokinase (EC 2.7.1.15)	<a href=&#39;?page=Annotation&feature=fig|59843.19.peg.3938&#39; target=_blank>fig|59843.19.peg.3938</a>, <a href=&#39;?page=Annotation&feature=fig|59843.19.peg.5593&#39; target=_blank>fig|59843.19.peg.5593</a>	yes	<a href=&#39;?page=Annotation&feature=fig|6666666.640629.peg.2657&#39; target=_blank>fig|6666666.640629.peg.2657</a>	yes
A and B	Carbohydrates	Monosaccharides	D-ribose utilization	Ribose operon repressor	<a href=&#39;?page=Annotation&feature=fig|59843.19.peg.593&#39; target=_blank>fig|59843.19.peg.593</a>, <a href=&#39;?page=Annotation&feature=fig|59843.19.peg.2551&#39; target=_blank>fig|59843.19.peg.2551</a>, <a href=&#39;?page=Annotation&feature=fig|59843.19.peg.3937&#39; target=_blank>fig|59843.19.peg.3937</a>	yes	<a href=&#39;?page=Annotation&feature=fig|6666666.640629.peg.652&#39; target=_blank>fig|6666666.640629.peg.652</a>	yes
A and B	Carbohydrates	Monosaccharides	Deoxyribose and Deoxynucleoside Catabolism	Deoxyribose-phosphate aldolase (EC 4.1.2.4)	<a href=&#39;?page=Annotation&feature=fig|59843.19.peg.1273&#39; target=_blank>fig|59843.19.peg.1273</a>	yes	<a href=&#39;?page=Annotation&feature=fig|6666666.640629.peg.273&#39; target=_blank>fig|6666666.640629.peg.273</a>	yes
A and B	Carbohydrates	Monosaccharides	Deoxyribose and Deoxynucleoside Catabolism	Phosphopentomutase (EC 5.4.2.7)	<a href=&#39;?page=Annotation&feature=fig|59843.19.peg.1271&#39; target=_blank>fig|59843.19.peg.1271</a>	yes	<a href=&#39;?page=Annotation&feature=fig|6666666.640629.peg.2582&#39; target=_blank>fig|6666666.640629.peg.2582</a>	yes
A and B	Carbohydrates	Monosaccharides	Deoxyribose and Deoxynucleoside Catabolism	Purine nucleoside phosphorylase (EC 2.4.2.1)	<a href=&#39;?page=Annotation&feature=fig|59843.19.peg.1270&#39; target=_blank>fig|59843.19.peg.1270</a>, <a href=&#39;?page=Annotation&feature=fig|59843.19.peg.4072&#39; target=_blank>fig|59843.19.peg.4072</a>	yes	<a href=&#39;?page=Annotation&feature=fig|6666666.640629.peg.603&#39; target=_blank>fig|6666666.640629.peg.603</a>, <a href=&#39;?page=Annotation&feature=fig|6666666.640629.peg.717&#39; target=_blank>fig|6666666.640629.peg.717</a>, <a href=&#39;?page=Annotation&feature=fig|6666666.640629.peg.2581&#39; target=_blank>fig|6666666.640629.peg.2581</a>	yes
A and B	Carbohydrates	Monosaccharides	Deoxyribose and Deoxynucleoside Catabolism	Pyrimidine-nucleoside phosphorylase (EC 2.4.2.2)	<a href=&#39;?page=Annotation&feature=fig|59843.19.peg.1269&#39; target=_blank>fig|59843.19.peg.1269</a>	yes	<a href=&#39;?page=Annotation&feature=fig|6666666.640629.peg.2580&#39; target=_blank>fig|6666666.640629.peg.2580</a>	yes
A and B	Carbohydrates	Monosaccharides	Deoxyribose and Deoxynucleoside Catabolism	Ribokinase (EC 2.7.1.15)	<a href=&#39;?page=Annotation&feature=fig|59843.19.peg.3938&#39; target=_blank>fig|59843.19.peg.3938</a>, <a href=&#39;?page=Annotation&feature=fig|59843.19.peg.5593&#39; target=_blank>fig|59843.19.peg.5593</a>	yes	<a href=&#39;?page=Annotation&feature=fig|6666666.640629.peg.2657&#39; target=_blank>fig|6666666.640629.peg.2657</a>	yes
A and B	Carbohydrates	Monosaccharides	Fructose utilization	1-phosphofructokinase (EC 2.7.1.56)	<a href=&#39;?page=Annotation&feature=fig|59843.19.peg.625&#39; target=_blank>fig|59843.19.peg.625</a>	yes	<a href=&#39;?page=Annotation&feature=fig|6666666.640629.peg.813&#39; target=_blank>fig|6666666.640629.peg.813</a>	yes
A and B	Carbohydrates	Monosaccharides	Fructose utilization	Fructokinase (EC 2.7.1.4)	<a href=&#39;?page=Annotation&feature=fig|59843.19.peg.681&#39; target=_blank>fig|59843.19.peg.681</a>	yes	<a href=&#39;?page=Annotation&feature=fig|6666666.640629.peg.2788&#39; target=_blank>fig|6666666.640629.peg.2788</a>	yes
A and B	Carbohydrates	Monosaccharides	Fructose utilization	Phosphoenolpyruvate-protein phosphotransferase of PTS system (EC 2.7.3.9)	<a href=&#39;?page=Annotation&feature=fig|59843.19.peg.3531&#39; target=_blank>fig|59843.19.peg.3531</a>, <a href=&#39;?page=Annotation&feature=fig|59843.19.peg.3843&#39; target=_blank>fig|59843.19.peg.3843</a>	yes	<a href=&#39;?page=Annotation&feature=fig|6666666.640629.peg.816&#39; target=_blank>fig|6666666.640629.peg.816</a>	yes
A and B	Carbohydrates	Monosaccharides	Fructose utilization	Transaldolase (EC 2.2.1.2)	<a href=&#39;?page=Annotation&feature=fig|59843.19.peg.2378&#39; target=_blank>fig|59843.19.peg.2378</a>	yes	<a href=&#39;?page=Annotation&feature=fig|6666666.640629.peg.1174&#39; target=_blank>fig|6666666.640629.peg.1174</a>, <a href=&#39;?page=Annotation&feature=fig|6666666.640629.peg.3004&#39; target=_blank>fig|6666666.640629.peg.3004</a>	yes
A and B	Carbohydrates	Monosaccharides	Fructose utilization	Transcriptional repressor of the fructose operon, DeoR family	<a href=&#39;?page=Annotation&feature=fig|59843.19.peg.626&#39; target=_blank>fig|59843.19.peg.626</a>, <a href=&#39;?page=Annotation&feature=fig|59843.19.peg.2227&#39; target=_blank>fig|59843.19.peg.2227</a>, <a href=&#39;?page=Annotation&feature=fig|59843.19.peg.2763&#39; target=_blank>fig|59843.19.peg.2763</a>	yes	<a href=&#39;?page=Annotation&feature=fig|6666666.640629.peg.812&#39; target=_blank>fig|6666666.640629.peg.812</a>, <a href=&#39;?page=Annotation&feature=fig|6666666.640629.peg.1156&#39; target=_blank>fig|6666666.640629.peg.1156</a>	yes
A and B	Carbohydrates	Monosaccharides	Xylose utilization	Xylose isomerase (EC 5.3.1.5)	<a href=&#39;?page=Annotation&feature=fig|59843.19.peg.1190&#39; target=_blank>fig|59843.19.peg.1190</a>	yes	<a href=&#39;?page=Annotation&feature=fig|6666666.640629.peg.1010&#39; target=_blank>fig|6666666.640629.peg.1010</a>	yes
A and B	Carbohydrates	Monosaccharides	Xylose utilization	Xylose-responsive transcription regulator, ROK family	<a href=&#39;?page=Annotation&feature=fig|59843.19.peg.1191&#39; target=_blank>fig|59843.19.peg.1191</a>	yes	<a href=&#39;?page=Annotation&feature=fig|6666666.640629.peg.1011&#39; target=_blank>fig|6666666.640629.peg.1011</a>, <a href=&#39;?page=Annotation&feature=fig|6666666.640629.peg.1013&#39; target=_blank>fig|6666666.640629.peg.1013</a>	yes
A and B	Carbohydrates	Monosaccharides	Xylose utilization	Xylulose kinase (EC 2.7.1.17)	<a href=&#39;?page=Annotation&feature=fig|59843.19.peg.1189&#39; target=_blank>fig|59843.19.peg.1189</a>	yes	<a href=&#39;?page=Annotation&feature=fig|6666666.640629.peg.1009&#39; target=_blank>fig|6666666.640629.peg.1009</a>	yes
A	Carbohydrates	Monosaccharides	D-Galacturonate and D-Glucuronate Utilization	2-keto-3-deoxygluconate permease (KDG permease)	<a href=&#39;?page=Annotation&feature=fig|59843.19.peg.2289&#39; target=_blank>fig|59843.19.peg.2289</a>	yes	<input type=&#39;button&#39; class=&#39;button&#39; value=&#39;find&#39; onclick=&#39;window.open("?page=SearchGene&fr=2-keto-3-deoxygluconate permease (KDG permease)&organism=6666666.640629&subsystem=D-Galacturonate_and_D-Glucuronate_Utilization&template_gene=fig|59843.19.peg.2289");&#39;>	no
A	Carbohydrates	Monosaccharides	D-Galacturonate and D-Glucuronate Utilization	D-mannonate oxidoreductase (EC 1.1.1.57)	<a href=&#39;?page=Annotation&feature=fig|59843.19.peg.1762&#39; target=_blank>fig|59843.19.peg.1762</a>	yes	<input type=&#39;button&#39; class=&#39;button&#39; value=&#39;find&#39; onclick=&#39;window.open("?page=SearchGene&fr=D-mannonate oxidoreductase (EC 1.1.1.57)&organism=6666666.640629&subsystem=D-Galacturonate_and_D-Glucuronate_Utilization&template_gene=fig|59843.19.peg.1762");&#39;>	no
A	Carbohydrates	Monosaccharides	D-Galacturonate and D-Glucuronate Utilization	Hexuronate utilization operon transcriptional repressor ExuR	<a href=&#39;?page=Annotation&feature=fig|59843.19.peg.2210&#39; target=_blank>fig|59843.19.peg.2210</a>	yes	<input type=&#39;button&#39; class=&#39;button&#39; value=&#39;find&#39; onclick=&#39;window.open("?page=SearchGene&fr=Hexuronate utilization operon transcriptional repressor ExuR&organism=6666666.640629&subsystem=D-Galacturonate_and_D-Glucuronate_Utilization&template_gene=fig|59843.19.peg.2210");&#39;>	no
A	Carbohydrates	Monosaccharides	D-Galacturonate and D-Glucuronate Utilization	Mannonate dehydratase (EC 4.2.1.8)	<a href=&#39;?page=Annotation&feature=fig|59843.19.peg.1761&#39; target=_blank>fig|59843.19.peg.1761</a>	yes	<input type=&#39;button&#39; class=&#39;button&#39; value=&#39;find&#39; onclick=&#39;window.open("?page=SearchGene&fr=Mannonate dehydratase (EC 4.2.1.8)&organism=6666666.640629&subsystem=D-Galacturonate_and_D-Glucuronate_Utilization&template_gene=fig|59843.19.peg.1761");&#39;>	no
A	Carbohydrates	Monosaccharides	D-galactarate, D-glucarate and D-glycerate catabolism	Sugar diacid utilization regulator SdaR	<a href=&#39;?page=Annotation&feature=fig|59843.19.peg.1730&#39; target=_blank>fig|59843.19.peg.1730</a>	yes	<input type=&#39;button&#39; class=&#39;button&#39; value=&#39;find&#39; onclick=&#39;window.open("?page=SearchGene&fr=Sugar diacid utilization regulator SdaR&organism=6666666.640629&subsystem=D-galactarate,_D-glucarate_and_D-glycerate_catabolism&template_gene=fig|59843.19.peg.1730");&#39;>	no
A	Carbohydrates	Monosaccharides	D-gluconate and ketogluconates metabolism	Gluconate permease	<a href=&#39;?page=Annotation&feature=fig|59843.19.peg.3591&#39; target=_blank>fig|59843.19.peg.3591</a>	yes	<input type=&#39;button&#39; class=&#39;button&#39; value=&#39;find&#39; onclick=&#39;window.open("?page=SearchGene&fr=Gluconate permease&organism=6666666.640629&subsystem=D-gluconate_and_ketogluconates_metabolism&template_gene=fig|59843.19.peg.3591");&#39;>	no
A	Carbohydrates	Monosaccharides	D-gluconate and ketogluconates metabolism	Gluconate transporter family protein	<a href=&#39;?page=Annotation&feature=fig|59843.19.peg.1979&#39; target=_blank>fig|59843.19.peg.1979</a>	yes	<input type=&#39;button&#39; class=&#39;button&#39; value=&#39;find&#39; onclick=&#39;window.open("?page=SearchGene&fr=Gluconate transporter family protein&organism=6666666.640629&subsystem=D-gluconate_and_ketogluconates_metabolism&template_gene=fig|59843.19.peg.1979");&#39;>	no
A	Carbohydrates	Monosaccharides	Deoxyribose and Deoxynucleoside Catabolism	Deoxyribonucleoside regulator DeoR (transcriptional repressor)	<a href=&#39;?page=Annotation&feature=fig|59843.19.peg.1274&#39; target=_blank>fig|59843.19.peg.1274</a>	yes	<input type=&#39;button&#39; class=&#39;button&#39; value=&#39;find&#39; onclick=&#39;window.open("?page=SearchGene&fr=Deoxyribonucleoside regulator DeoR (transcriptional repressor)&organism=6666666.640629&subsystem=Deoxyribose_and_Deoxynucleoside_Catabolism&template_gene=fig|59843.19.peg.1274");&#39;>	no
A	Carbohydrates	Monosaccharides	Deoxyribose and Deoxynucleoside Catabolism	Na+ dependent nucleoside transporter NupC	<a href=&#39;?page=Annotation&feature=fig|59843.19.peg.1272&#39; target=_blank>fig|59843.19.peg.1272</a>	yes	<input type=&#39;button&#39; class=&#39;button&#39; value=&#39;find&#39; onclick=&#39;window.open("?page=SearchGene&fr=Na+ dependent nucleoside transporter NupC&organism=6666666.640629&subsystem=Deoxyribose_and_Deoxynucleoside_Catabolism&template_gene=fig|59843.19.peg.1272");&#39;>	no
A	Carbohydrates	Monosaccharides	L-Arabinose utilization	Arabinan endo-1,5-alpha-L-arabinosidase (EC 3.2.1.99)	<a href=&#39;?page=Annotation&feature=fig|59843.19.peg.2523&#39; target=_blank>fig|59843.19.peg.2523</a>, <a href=&#39;?page=Annotation&feature=fig|59843.19.peg.5066&#39; target=_blank>fig|59843.19.peg.5066</a>	yes	<input type=&#39;button&#39; class=&#39;button&#39; value=&#39;find&#39; onclick=&#39;window.open("?page=SearchGene&fr=Arabinan endo-1,5-alpha-L-arabinosidase (EC 3.2.1.99)&organism=6666666.640629&subsystem=L-Arabinose_utilization&template_gene=fig|59843.19.peg.2523");&#39;>	no
A	Carbohydrates	Monosaccharides	L-Arabinose utilization	L-arabinose isomerase (EC 5.3.1.4)	<a href=&#39;?page=Annotation&feature=fig|59843.19.peg.3544&#39; target=_blank>fig|59843.19.peg.3544</a>	yes	<input type=&#39;button&#39; class=&#39;button&#39; value=&#39;find&#39; onclick=&#39;window.open("?page=SearchGene&fr=L-arabinose isomerase (EC 5.3.1.4)&organism=6666666.640629&subsystem=L-Arabinose_utilization&template_gene=fig|59843.19.peg.3544");&#39;>	no
A	Carbohydrates	Monosaccharides	L-Arabinose utilization	L-ribulose-5-phosphate 4-epimerase (EC 5.1.3.4)	<a href=&#39;?page=Annotation&feature=fig|59843.19.peg.3546&#39; target=_blank>fig|59843.19.peg.3546</a>	yes	<input type=&#39;button&#39; class=&#39;button&#39; value=&#39;find&#39; onclick=&#39;window.open("?page=SearchGene&fr=L-ribulose-5-phosphate 4-epimerase (EC 5.1.3.4)&organism=6666666.640629&subsystem=L-Arabinose_utilization&template_gene=fig|59843.19.peg.3546");&#39;>	no
A	Carbohydrates	Monosaccharides	L-Arabinose utilization	Ribulokinase (EC 2.7.1.16)	<a href=&#39;?page=Annotation&feature=fig|59843.19.peg.3547&#39; target=_blank>fig|59843.19.peg.3547</a>	yes	<input type=&#39;button&#39; class=&#39;button&#39; value=&#39;find&#39; onclick=&#39;window.open("?page=SearchGene&fr=Ribulokinase (EC 2.7.1.16)&organism=6666666.640629&subsystem=L-Arabinose_utilization&template_gene=fig|59843.19.peg.3547");&#39;>	no
A	Carbohydrates	Monosaccharides	L-Arabinose utilization	Transcriptional repressor of arabinoside utilization operon, GntR family	<a href=&#39;?page=Annotation&feature=fig|59843.19.peg.3545&#39; target=_blank>fig|59843.19.peg.3545</a>	yes	<input type=&#39;button&#39; class=&#39;button&#39; value=&#39;find&#39; onclick=&#39;window.open("?page=SearchGene&fr=Transcriptional repressor of arabinoside utilization operon, GntR family&organism=6666666.640629&subsystem=L-Arabinose_utilization&template_gene=fig|59843.19.peg.3545");&#39;>	no
A	Carbohydrates	Monosaccharides	Mannose Metabolism	Activator of the mannose operon (transcriptional antiterminator), BglG family	<a href=&#39;?page=Annotation&feature=fig|59843.19.peg.2293&#39; target=_blank>fig|59843.19.peg.2293</a>	yes	<input type=&#39;button&#39; class=&#39;button&#39; value=&#39;find&#39; onclick=&#39;window.open("?page=SearchGene&fr=Activator of the mannose operon (transcriptional antiterminator), BglG family&organism=6666666.640629&subsystem=Mannose_Metabolism&template_gene=fig|59843.19.peg.2293");&#39;>	no
A	Carbohydrates	Monosaccharides	Mannose Metabolism	Alpha-1,2-mannosidase	<a href=&#39;?page=Annotation&feature=fig|59843.19.peg.1784&#39; target=_blank>fig|59843.19.peg.1784</a>	yes	<input type=&#39;button&#39; class=&#39;button&#39; value=&#39;find&#39; onclick=&#39;window.open("?page=SearchGene&fr=Alpha-1,2-mannosidase&organism=6666666.640629&subsystem=Mannose_Metabolism&template_gene=fig|59843.19.peg.1784");&#39;>	no
A	Carbohydrates	Monosaccharides	Mannose Metabolism	Alpha-mannosidase (EC 3.2.1.24)	<a href=&#39;?page=Annotation&feature=fig|59843.19.peg.3924&#39; target=_blank>fig|59843.19.peg.3924</a>	yes	<input type=&#39;button&#39; class=&#39;button&#39; value=&#39;find&#39; onclick=&#39;window.open("?page=SearchGene&fr=Alpha-mannosidase (EC 3.2.1.24)&organism=6666666.640629&subsystem=Mannose_Metabolism&template_gene=fig|59843.19.peg.3924");&#39;>	no
A	Carbohydrates	Monosaccharides	Mannose Metabolism	Mannose-6-phosphate isomerase (EC 5.3.1.8)	<a href=&#39;?page=Annotation&feature=fig|59843.19.peg.735&#39; target=_blank>fig|59843.19.peg.735</a>	yes	<input type=&#39;button&#39; class=&#39;button&#39; value=&#39;find&#39; onclick=&#39;window.open("?page=SearchGene&fr=Mannose-6-phosphate isomerase (EC 5.3.1.8)&organism=6666666.640629&subsystem=Mannose_Metabolism&template_gene=fig|59843.19.peg.735");&#39;>	no
A	Carbohydrates	Monosaccharides	Mannose Metabolism	Phosphomannomutase (EC 5.4.2.8)	<a href=&#39;?page=Annotation&feature=fig|59843.19.peg.1546&#39; target=_blank>fig|59843.19.peg.1546</a>	yes	<input type=&#39;button&#39; class=&#39;button&#39; value=&#39;find&#39; onclick=&#39;window.open("?page=SearchGene&fr=Phosphomannomutase (EC 5.4.2.8)&organism=6666666.640629&subsystem=Mannose_Metabolism&template_gene=fig|59843.19.peg.1546");&#39;>	no
A	Carbohydrates	Monosaccharides	Xylose utilization	Xylanase	<a href=&#39;?page=Annotation&feature=fig|59843.19.peg.3587&#39; target=_blank>fig|59843.19.peg.3587</a>	yes	<input type=&#39;button&#39; class=&#39;button&#39; value=&#39;find&#39; onclick=&#39;window.open("?page=SearchGene&fr=Xylanase&organism=6666666.640629&subsystem=Xylose_utilization&template_gene=fig|59843.19.peg.3587");&#39;>	no
A	Carbohydrates	Monosaccharides	Xylose utilization	Xylose ABC transporter, substrate-binding component	<a href=&#39;?page=Annotation&feature=fig|59843.19.peg.2895&#39; target=_blank>fig|59843.19.peg.2895</a>, <a href=&#39;?page=Annotation&feature=fig|59843.19.peg.3371&#39; target=_blank>fig|59843.19.peg.3371</a>	yes	<input type=&#39;button&#39; class=&#39;button&#39; value=&#39;find&#39; onclick=&#39;window.open("?page=SearchGene&fr=Xylose ABC transporter, substrate-binding component&organism=6666666.640629&subsystem=Xylose_utilization&template_gene=fig|59843.19.peg.2895");&#39;>	no
B	Carbohydrates	Monosaccharides	D-Galacturonate and D-Glucuronate Utilization	2-dehydro-3-deoxygluconate kinase (EC 2.7.1.45)	<input type=&#39;button&#39; value=&#39;find&#39; onclick=&#39;window.open("?page=SearchGene&fr=2-dehydro-3-deoxygluconate kinase (EC 2.7.1.45)&organism=59843.19&subsystem=D-Galacturonate_and_D-Glucuronate_Utilization&template_gene=fig|6666666.640629.peg.2003");&#39;>	no	<a href=&#39;?page=Annotation&feature=fig|6666666.640629.peg.2003&#39; target=_blank>fig|6666666.640629.peg.2003</a>	yes
B	Carbohydrates	Monosaccharides	D-Galacturonate and D-Glucuronate Utilization	5-dehydro-4-deoxyglucarate dehydratase (EC 4.2.1.41)	<input type=&#39;button&#39; value=&#39;find&#39; onclick=&#39;window.open("?page=SearchGene&fr=5-dehydro-4-deoxyglucarate dehydratase (EC 4.2.1.41)&organism=59843.19&subsystem=D-Galacturonate_and_D-Glucuronate_Utilization&template_gene=fig|6666666.640629.peg.1945");&#39;>	no	<a href=&#39;?page=Annotation&feature=fig|6666666.640629.peg.1945&#39; target=_blank>fig|6666666.640629.peg.1945</a>	yes
B	Carbohydrates	Monosaccharides	D-Galacturonate and D-Glucuronate Utilization	Rhamnogalacturonides degradation protein RhiN	<input type=&#39;button&#39; value=&#39;find&#39; onclick=&#39;window.open("?page=SearchGene&fr=Rhamnogalacturonides degradation protein RhiN&organism=59843.19&subsystem=D-Galacturonate_and_D-Glucuronate_Utilization&template_gene=fig|6666666.640629.peg.2012");&#39;>	no	<a href=&#39;?page=Annotation&feature=fig|6666666.640629.peg.2012&#39; target=_blank>fig|6666666.640629.peg.2012</a>	yes
B	Carbohydrates	Monosaccharides	D-galactarate, D-glucarate and D-glycerate catabolism	Glucarate dehydratase (EC 4.2.1.40)	<input type=&#39;button&#39; value=&#39;find&#39; onclick=&#39;window.open("?page=SearchGene&fr=Glucarate dehydratase (EC 4.2.1.40)&organism=59843.19&subsystem=D-galactarate,_D-glucarate_and_D-glycerate_catabolism&template_gene=fig|6666666.640629.peg.1940");&#39;>	no	<a href=&#39;?page=Annotation&feature=fig|6666666.640629.peg.1940&#39; target=_blank>fig|6666666.640629.peg.1940</a>	yes
B	Carbohydrates	Monosaccharides	D-galactarate, D-glucarate and D-glycerate catabolism	Predicted 5-dehydro-4-deoxyglucarate regulator YcbG	<input type=&#39;button&#39; value=&#39;find&#39; onclick=&#39;window.open("?page=SearchGene&fr=Predicted 5-dehydro-4-deoxyglucarate regulator YcbG&organism=59843.19&subsystem=D-galactarate,_D-glucarate_and_D-glycerate_catabolism&template_gene=fig|6666666.640629.peg.1946");&#39;>	no	<a href=&#39;?page=Annotation&feature=fig|6666666.640629.peg.1946&#39; target=_blank>fig|6666666.640629.peg.1946</a>	yes
B	Carbohydrates	Monosaccharides	D-gluconate and ketogluconates metabolism	Gluconate permease, Bsu4004 homolog	<input type=&#39;button&#39; value=&#39;find&#39; onclick=&#39;window.open("?page=SearchGene&fr=Gluconate permease, Bsu4004 homolog&organism=59843.19&subsystem=D-gluconate_and_ketogluconates_metabolism&template_gene=fig|6666666.640629.peg.2035");&#39;>	no	<a href=&#39;?page=Annotation&feature=fig|6666666.640629.peg.2035&#39; target=_blank>fig|6666666.640629.peg.2035</a>	yes
B	Carbohydrates	Monosaccharides	D-gluconate and ketogluconates metabolism	Low-affinity gluconate/H+ symporter GntU	<input type=&#39;button&#39; value=&#39;find&#39; onclick=&#39;window.open("?page=SearchGene&fr=Low-affinity gluconate/H+ symporter GntU&organism=59843.19&subsystem=D-gluconate_and_ketogluconates_metabolism&template_gene=fig|6666666.640629.peg.1182");&#39;>	no	<a href=&#39;?page=Annotation&feature=fig|6666666.640629.peg.1182&#39; target=_blank>fig|6666666.640629.peg.1182</a>	yes
B	Carbohydrates	Monosaccharides	Fructose utilization	Phosphotransferase system, phosphocarrier protein HPr	<input type=&#39;button&#39; value=&#39;find&#39; onclick=&#39;window.open("?page=SearchGene&fr=Phosphotransferase system, phosphocarrier protein HPr&organism=59843.19&subsystem=Fructose_utilization&template_gene=fig|6666666.640629.peg.815");&#39;>	no	<a href=&#39;?page=Annotation&feature=fig|6666666.640629.peg.815&#39; target=_blank>fig|6666666.640629.peg.815</a>, <a href=&#39;?page=Annotation&feature=fig|6666666.640629.peg.3357&#39; target=_blank>fig|6666666.640629.peg.3357</a>	yes
B	Carbohydrates	Monosaccharides	Xylose utilization	D-xylose proton-symporter XylE	<input type=&#39;button&#39; value=&#39;find&#39; onclick=&#39;window.open("?page=SearchGene&fr=D-xylose proton-symporter XylE&organism=59843.19&subsystem=Xylose_utilization&template_gene=fig|6666666.640629.peg.1014");&#39;>	no	<a href=&#39;?page=Annotation&feature=fig|6666666.640629.peg.1014&#39; target=_blank>fig|6666666.640629.peg.1014</a>	yes
A and B	Carbohydrates	One-carbon Metabolism	One-carbon metabolism by tetrahydropterines	5,10-methylenetetrahydrofolate reductase (EC 1.5.1.20)	<a href=&#39;?page=Annotation&feature=fig|59843.19.peg.3876&#39; target=_blank>fig|59843.19.peg.3876</a>	yes	<a href=&#39;?page=Annotation&feature=fig|6666666.640629.peg.3974&#39; target=_blank>fig|6666666.640629.peg.3974</a>	yes
A and B	Carbohydrates	One-carbon Metabolism	One-carbon metabolism by tetrahydropterines	5-formyltetrahydrofolate cyclo-ligase (EC 6.3.3.2)	<a href=&#39;?page=Annotation&feature=fig|59843.19.peg.910&#39; target=_blank>fig|59843.19.peg.910</a>	yes	<a href=&#39;?page=Annotation&feature=fig|6666666.640629.peg.320&#39; target=_blank>fig|6666666.640629.peg.320</a>	yes
A and B	Carbohydrates	One-carbon Metabolism	One-carbon metabolism by tetrahydropterines	Formyltetrahydrofolate deformylase (EC 3.5.1.10)	<a href=&#39;?page=Annotation&feature=fig|59843.19.peg.811&#39; target=_blank>fig|59843.19.peg.811</a>	yes	<a href=&#39;?page=Annotation&feature=fig|6666666.640629.peg.3266&#39; target=_blank>fig|6666666.640629.peg.3266</a>	yes
A and B	Carbohydrates	One-carbon Metabolism	One-carbon metabolism by tetrahydropterines	Methenyltetrahydrofolate cyclohydrolase (EC 3.5.4.9)	<a href=&#39;?page=Annotation&feature=fig|59843.19.peg.4037&#39; target=_blank>fig|59843.19.peg.4037</a>, <a href=&#39;?page=Annotation&feature=fig|59843.19.peg.5114&#39; target=_blank>fig|59843.19.peg.5114</a>	yes	<a href=&#39;?page=Annotation&feature=fig|6666666.640629.peg.373&#39; target=_blank>fig|6666666.640629.peg.373</a>	yes
A and B	Carbohydrates	One-carbon Metabolism	One-carbon metabolism by tetrahydropterines	Methylenetetrahydrofolate dehydrogenase (NADP+) (EC 1.5.1.5)	<a href=&#39;?page=Annotation&feature=fig|59843.19.peg.4037&#39; target=_blank>fig|59843.19.peg.4037</a>, <a href=&#39;?page=Annotation&feature=fig|59843.19.peg.5114&#39; target=_blank>fig|59843.19.peg.5114</a>	yes	<a href=&#39;?page=Annotation&feature=fig|6666666.640629.peg.373&#39; target=_blank>fig|6666666.640629.peg.373</a>	yes
A and B	Carbohydrates	Organic acids	Glycerate metabolism	2-hydroxy-3-oxopropionate reductase (EC 1.1.1.60)	<a href=&#39;?page=Annotation&feature=fig|59843.19.peg.3592&#39; target=_blank>fig|59843.19.peg.3592</a>	yes	<a href=&#39;?page=Annotation&feature=fig|6666666.640629.peg.3592&#39; target=_blank>fig|6666666.640629.peg.3592</a>	yes
A and B	Carbohydrates	Organic acids	Glycerate metabolism	D-glycerate transporter (predicted)	<a href=&#39;?page=Annotation&feature=fig|59843.19.peg.1732&#39; target=_blank>fig|59843.19.peg.1732</a>	yes	<a href=&#39;?page=Annotation&feature=fig|6666666.640629.peg.996&#39; target=_blank>fig|6666666.640629.peg.996</a>	yes
A and B	Carbohydrates	Organic acids	Glycerate metabolism	Glycerate kinase (EC 2.7.1.31)	<a href=&#39;?page=Annotation&feature=fig|59843.19.peg.951&#39; target=_blank>fig|59843.19.peg.951</a>, <a href=&#39;?page=Annotation&feature=fig|59843.19.peg.1177&#39; target=_blank>fig|59843.19.peg.1177</a>, <a href=&#39;?page=Annotation&feature=fig|59843.19.peg.1540&#39; target=_blank>fig|59843.19.peg.1540</a>, <a href=&#39;?page=Annotation&feature=fig|59843.19.peg.1731&#39; target=_blank>fig|…	yes	<a href=&#39;?page=Annotation&feature=fig|6666666.640629.peg.995&#39; target=_blank>fig|6666666.640629.peg.995</a>, <a href=&#39;?page=Annotation&feature=fig|6666666.640629.peg.4094&#39; target=_blank>fig|6666666.640629.peg.4094</a>	yes
A and B	Carbohydrates	Organic acids	Glycerate metabolism	Pyruvate kinase (EC 2.7.1.40)	<a href=&#39;?page=Annotation&feature=fig|59843.19.peg.506&#39; target=_blank>fig|59843.19.peg.506</a>, <a href=&#39;?page=Annotation&feature=fig|59843.19.peg.3073&#39; target=_blank>fig|59843.19.peg.3073</a>	yes	<a href=&#39;?page=Annotation&feature=fig|6666666.640629.peg.79&#39; target=_blank>fig|6666666.640629.peg.79</a>	yes
A	Carbohydrates	Organic acids	Lactate utilization	Predicted L-lactate dehydrogenase, Fe-S oxidoreductase subunit YkgE	<a href=&#39;?page=Annotation&feature=fig|59843.19.peg.5171&#39; target=_blank>fig|59843.19.peg.5171</a>	yes	<input type=&#39;button&#39; class=&#39;button&#39; value=&#39;find&#39; onclick=&#39;window.open("?page=SearchGene&fr=Predicted L-lactate dehydrogenase, Fe-S oxidoreductase subunit YkgE&organism=6666666.640629&subsystem=Lactate_utilization&template_gene=fig|59843.19.peg.5171");&#39;>	no
A	Carbohydrates	Organic acids	Lactate utilization	Predicted L-lactate dehydrogenase, Iron-sulfur cluster-binding subunit YkgF	<a href=&#39;?page=Annotation&feature=fig|59843.19.peg.5170&#39; target=_blank>fig|59843.19.peg.5170</a>	yes	<input type=&#39;button&#39; class=&#39;button&#39; value=&#39;find&#39; onclick=&#39;window.open("?page=SearchGene&fr=Predicted L-lactate dehydrogenase, Iron-sulfur cluster-binding subunit YkgF&organism=6666666.640629&subsystem=Lactate_utilization&template_gene=fig|59843.19.peg.5170");&#39;>	no
A	Carbohydrates	Organic acids	Lactate utilization	Predicted L-lactate dehydrogenase, hypothetical protein subunit YkgG	<a href=&#39;?page=Annotation&feature=fig|59843.19.peg.5169&#39; target=_blank>fig|59843.19.peg.5169</a>	yes	<input type=&#39;button&#39; class=&#39;button&#39; value=&#39;find&#39; onclick=&#39;window.open("?page=SearchGene&fr=Predicted L-lactate dehydrogenase, hypothetical protein subunit YkgG&organism=6666666.640629&subsystem=Lactate_utilization&template_gene=fig|59843.19.peg.5169");&#39;>	no
B	Carbohydrates	Organic acids	Glycerate metabolism	Hydroxypyruvate reductase (EC 1.1.1.81)	<input type=&#39;button&#39; value=&#39;find&#39; onclick=&#39;window.open("?page=SearchGene&fr=Hydroxypyruvate reductase (EC 1.1.1.81)&organism=59843.19&subsystem=Glycerate_metabolism&template_gene=fig|6666666.640629.peg.730");&#39;>	no	<a href=&#39;?page=Annotation&feature=fig|6666666.640629.peg.730&#39; target=_blank>fig|6666666.640629.peg.730</a>, <a href=&#39;?page=Annotation&feature=fig|6666666.640629.peg.1035&#39; target=_blank>fig|6666666.640629.peg.1035</a>	yes
B	Carbohydrates	Organic acids	Glycerate metabolism	Serine--glyoxylate aminotransferase (EC 2.6.1.45)	<input type=&#39;button&#39; value=&#39;find&#39; onclick=&#39;window.open("?page=SearchGene&fr=Serine--glyoxylate aminotransferase (EC 2.6.1.45)&organism=59843.19&subsystem=Glycerate_metabolism&template_gene=fig|6666666.640629.peg.2885");&#39;>	no	<a href=&#39;?page=Annotation&feature=fig|6666666.640629.peg.2885&#39; target=_blank>fig|6666666.640629.peg.2885</a>	yes
B	Carbohydrates	Organic acids	Methylcitrate cycle	2-methylcitrate dehydratase (EC 4.2.1.79)	<input type=&#39;button&#39; value=&#39;find&#39; onclick=&#39;window.open("?page=SearchGene&fr=2-methylcitrate dehydratase (EC 4.2.1.79)&organism=59843.19&subsystem=Methylcitrate_cycle&template_gene=fig|6666666.640629.peg.3578");&#39;>	no	<a href=&#39;?page=Annotation&feature=fig|6666666.640629.peg.3578&#39; target=_blank>fig|6666666.640629.peg.3578</a>	yes
B	Carbohydrates	Organic acids	Methylcitrate cycle	2-methylcitrate synthase (EC 2.3.3.5)	<input type=&#39;button&#39; value=&#39;find&#39; onclick=&#39;window.open("?page=SearchGene&fr=2-methylcitrate synthase (EC 2.3.3.5)&organism=59843.19&subsystem=Methylcitrate_cycle&template_gene=fig|6666666.640629.peg.3579");&#39;>	no	<a href=&#39;?page=Annotation&feature=fig|6666666.640629.peg.3579&#39; target=_blank>fig|6666666.640629.peg.3579</a>	yes
B	Carbohydrates	Organic acids	Methylcitrate cycle	Methylisocitrate lyase (EC 4.1.3.30)	<input type=&#39;button&#39; value=&#39;find&#39; onclick=&#39;window.open("?page=SearchGene&fr=Methylisocitrate lyase (EC 4.1.3.30)&organism=59843.19&subsystem=Methylcitrate_cycle&template_gene=fig|6666666.640629.peg.3577");&#39;>	no	<a href=&#39;?page=Annotation&feature=fig|6666666.640629.peg.3577&#39; target=_blank>fig|6666666.640629.peg.3577</a>	yes
A and B	Carbohydrates	Polysaccharides	Glycogen metabolism	1,4-alpha-glucan (glycogen) branching enzyme, GH-13-type (EC 2.4.1.18)	<a href=&#39;?page=Annotation&feature=fig|59843.19.peg.4356&#39; target=_blank>fig|59843.19.peg.4356</a>	yes	<a href=&#39;?page=Annotation&feature=fig|6666666.640629.peg.2753&#39; target=_blank>fig|6666666.640629.peg.2753</a>	yes
A and B	Carbohydrates	Polysaccharides	Glycogen metabolism	Glucose-1-phosphate adenylyltransferase (EC 2.7.7.27)	<a href=&#39;?page=Annotation&feature=fig|59843.19.peg.3393&#39; target=_blank>fig|59843.19.peg.3393</a>, <a href=&#39;?page=Annotation&feature=fig|59843.19.peg.4355&#39; target=_blank>fig|59843.19.peg.4355</a>	yes	<a href=&#39;?page=Annotation&feature=fig|6666666.640629.peg.2752&#39; target=_blank>fig|6666666.640629.peg.2752</a>	yes
A and B	Carbohydrates	Polysaccharides	Glycogen metabolism	Glycogen biosynthesis protein GlgD, glucose-1-phosphate adenylyltransferase family	<a href=&#39;?page=Annotation&feature=fig|59843.19.peg.3394&#39; target=_blank>fig|59843.19.peg.3394</a>	yes	<a href=&#39;?page=Annotation&feature=fig|6666666.640629.peg.2751&#39; target=_blank>fig|6666666.640629.peg.2751</a>	yes
A and B	Carbohydrates	Polysaccharides	Glycogen metabolism	Glycogen phosphorylase (EC 2.4.1.1)	<a href=&#39;?page=Annotation&feature=fig|59843.19.peg.3395&#39; target=_blank>fig|59843.19.peg.3395</a>	yes	<a href=&#39;?page=Annotation&feature=fig|6666666.640629.peg.2749&#39; target=_blank>fig|6666666.640629.peg.2749</a>	yes
A and B	Carbohydrates	Polysaccharides	Glycogen metabolism	Glycogen synthase, ADP-glucose transglucosylase (EC 2.4.1.21)	<a href=&#39;?page=Annotation&feature=fig|59843.19.peg.4357&#39; target=_blank>fig|59843.19.peg.4357</a>	yes	<a href=&#39;?page=Annotation&feature=fig|6666666.640629.peg.2750&#39; target=_blank>fig|6666666.640629.peg.2750</a>	yes
B	Carbohydrates	Polysaccharides	Glycogen metabolism	4-alpha-glucanotransferase (amylomaltase) (EC 2.4.1.25)	<input type=&#39;button&#39; value=&#39;find&#39; onclick=&#39;window.open("?page=SearchGene&fr=4-alpha-glucanotransferase (amylomaltase) (EC 2.4.1.25)&organism=59843.19&subsystem=Glycogen_metabolism&template_gene=fig|6666666.640629.peg.2748");&#39;>	no	<a href=&#39;?page=Annotation&feature=fig|6666666.640629.peg.2748&#39; target=_blank>fig|6666666.640629.peg.2748</a>	yes
A and B	Carbohydrates	Sugar alcohols	Glycerol and Glycerol-3-phosphate Uptake and Utilization	Aerobic glycerol-3-phosphate dehydrogenase (EC 1.1.5.3)	<a href=&#39;?page=Annotation&feature=fig|59843.19.peg.298&#39; target=_blank>fig|59843.19.peg.298</a>, <a href=&#39;?page=Annotation&feature=fig|59843.19.peg.5563&#39; target=_blank>fig|59843.19.peg.5563</a>	yes	<a href=&#39;?page=Annotation&feature=fig|6666666.640629.peg.883&#39; target=_blank>fig|6666666.640629.peg.883</a>	yes
A and B	Carbohydrates	Sugar alcohols	Glycerol and Glycerol-3-phosphate Uptake and Utilization	Glycerol kinase (EC 2.7.1.30)	<a href=&#39;?page=Annotation&feature=fig|59843.19.peg.5564&#39; target=_blank>fig|59843.19.peg.5564</a>	yes	<a href=&#39;?page=Annotation&feature=fig|6666666.640629.peg.884&#39; target=_blank>fig|6666666.640629.peg.884</a>, <a href=&#39;?page=Annotation&feature=fig|6666666.640629.peg.1038&#39; target=_blank>fig|6666666.640629.peg.1038</a>	yes
A and B	Carbohydrates	Sugar alcohols	Glycerol and Glycerol-3-phosphate Uptake and Utilization	Glycerol-3-phosphate dehydrogenase [NAD(P)+] (EC 1.1.1.94)	<a href=&#39;?page=Annotation&feature=fig|59843.19.peg.4119&#39; target=_blank>fig|59843.19.peg.4119</a>	yes	<a href=&#39;?page=Annotation&feature=fig|6666666.640629.peg.2515&#39; target=_blank>fig|6666666.640629.peg.2515</a>	yes
A and B	Carbohydrates	Sugar alcohols	Glycerol and Glycerol-3-phosphate Uptake and Utilization	Glycerol-3-phosphate responsive antiterminator (mRNA-binding)	<a href=&#39;?page=Annotation&feature=fig|59843.19.peg.295&#39; target=_blank>fig|59843.19.peg.295</a>	yes	<a href=&#39;?page=Annotation&feature=fig|6666666.640629.peg.886&#39; target=_blank>fig|6666666.640629.peg.886</a>	yes
A and B	Carbohydrates	Sugar alcohols	Glycerol and Glycerol-3-phosphate Uptake and Utilization	Glycerophosphoryl diester phosphodiesterase (EC 3.1.4.46)	<a href=&#39;?page=Annotation&feature=fig|59843.19.peg.259&#39; target=_blank>fig|59843.19.peg.259</a>, <a href=&#39;?page=Annotation&feature=fig|59843.19.peg.1836&#39; target=_blank>fig|59843.19.peg.1836</a>, <a href=&#39;?page=Annotation&feature=fig|59843.19.peg.2496&#39; target=_blank>fig|59843.19.peg.2496</a>, <a href=&#39;?page=Annotation&feature=fig|59843.19.peg.2768&#39; target=_blank>fig|…	yes	<a href=&#39;?page=Annotation&feature=fig|6666666.640629.peg.415&#39; target=_blank>fig|6666666.640629.peg.415</a>, <a href=&#39;?page=Annotation&feature=fig|6666666.640629.peg.3562&#39; target=_blank>fig|6666666.640629.peg.3562</a>	yes
A	Carbohydrates	Sugar alcohols	Glycerol and Glycerol-3-phosphate Uptake and Utilization	Glycerol-3-phosphate ABC transporter, periplasmic glycerol-3-phosphate-binding protein (TC 3.A.1.1.3)	<a href=&#39;?page=Annotation&feature=fig|59843.19.peg.2492&#39; target=_blank>fig|59843.19.peg.2492</a>, <a href=&#39;?page=Annotation&feature=fig|59843.19.peg.2767&#39; target=_blank>fig|59843.19.peg.2767</a>, <a href=&#39;?page=Annotation&feature=fig|59843.19.peg.3077&#39; target=_blank>fig|59843.19.peg.3077</a>	yes	<input type=&#39;button&#39; class=&#39;button&#39; value=&#39;find&#39; onclick=&#39;window.open("?page=SearchGene&fr=Glycerol-3-phosphate ABC transporter, periplasmic glycerol-3-phosphate-binding protein (TC 3.A.1.1.3)&organism=6666666.640629&subsystem=Glycerol_and_Glycerol-3-phosphate_Uptake_and_Utilization&template_gene=fig|59843.19.peg.2492");&#39;>	no
A	Carbohydrates	Sugar alcohols	Glycerol and Glycerol-3-phosphate Uptake and Utilization	Glycerol-3-phosphate ABC transporter, permease protein UgpA (TC 3.A.1.1.3)	<a href=&#39;?page=Annotation&feature=fig|59843.19.peg.329&#39; target=_blank>fig|59843.19.peg.329</a>	yes	<input type=&#39;button&#39; class=&#39;button&#39; value=&#39;find&#39; onclick=&#39;window.open("?page=SearchGene&fr=Glycerol-3-phosphate ABC transporter, permease protein UgpA (TC 3.A.1.1.3)&organism=6666666.640629&subsystem=Glycerol_and_Glycerol-3-phosphate_Uptake_and_Utilization&template_gene=fig|59843.19.peg.329");&#39;>	no
A	Carbohydrates	Sugar alcohols	Glycerol and Glycerol-3-phosphate Uptake and Utilization	Glycerol-3-phosphate ABC transporter, permease protein UgpE (TC 3.A.1.1.3)	<a href=&#39;?page=Annotation&feature=fig|59843.19.peg.328&#39; target=_blank>fig|59843.19.peg.328</a>, <a href=&#39;?page=Annotation&feature=fig|59843.19.peg.3934&#39; target=_blank>fig|59843.19.peg.3934</a>	yes	<input type=&#39;button&#39; class=&#39;button&#39; value=&#39;find&#39; onclick=&#39;window.open("?page=SearchGene&fr=Glycerol-3-phosphate ABC transporter, permease protein UgpE (TC 3.A.1.1.3)&organism=6666666.640629&subsystem=Glycerol_and_Glycerol-3-phosphate_Uptake_and_Utilization&template_gene=fig|59843.19.peg.328");&#39;>	no
B	Carbohydrates	Sugar alcohols	Glycerol and Glycerol-3-phosphate Uptake and Utilization	Glycerol uptake facilitator protein	<input type=&#39;button&#39; value=&#39;find&#39; onclick=&#39;window.open("?page=SearchGene&fr=Glycerol uptake facilitator protein&organism=59843.19&subsystem=Glycerol_and_Glycerol-3-phosphate_Uptake_and_Utilization&template_gene=fig|6666666.640629.peg.885");&#39;>	no	<a href=&#39;?page=Annotation&feature=fig|6666666.640629.peg.885&#39; target=_blank>fig|6666666.640629.peg.885</a>, <a href=&#39;?page=Annotation&feature=fig|6666666.640629.peg.1039&#39; target=_blank>fig|6666666.640629.peg.1039</a>	yes
B	Carbohydrates	Sugar alcohols	Inositol catabolism	5-keto-2-deoxygluconokinase (EC 2.7.1.92)	<input type=&#39;button&#39; value=&#39;find&#39; onclick=&#39;window.open("?page=SearchGene&fr=5-keto-2-deoxygluconokinase (EC 2.7.1.92)&organism=59843.19&subsystem=Inositol_catabolism&template_gene=fig|6666666.640629.peg.1960");&#39;>	no	<a href=&#39;?page=Annotation&feature=fig|6666666.640629.peg.1960&#39; target=_blank>fig|6666666.640629.peg.1960</a>	yes
B	Carbohydrates	Sugar alcohols	Inositol catabolism	Glyceraldehyde-3-phosphate ketol-isomerase (EC 5.3.1.1)	<input type=&#39;button&#39; value=&#39;find&#39; onclick=&#39;window.open("?page=SearchGene&fr=Glyceraldehyde-3-phosphate ketol-isomerase (EC 5.3.1.1)&organism=59843.19&subsystem=Inositol_catabolism&template_gene=fig|6666666.640629.peg.1965");&#39;>	no	<a href=&#39;?page=Annotation&feature=fig|6666666.640629.peg.1965&#39; target=_blank>fig|6666666.640629.peg.1965</a>	yes
B	Carbohydrates	Sugar alcohols	Inositol catabolism	Major myo-inositol transporter IolT	<input type=&#39;button&#39; value=&#39;find&#39; onclick=&#39;window.open("?page=SearchGene&fr=Major myo-inositol transporter IolT&organism=59843.19&subsystem=Inositol_catabolism&template_gene=fig|6666666.640629.peg.1967");&#39;>	no	<a href=&#39;?page=Annotation&feature=fig|6666666.640629.peg.1967&#39; target=_blank>fig|6666666.640629.peg.1967</a>	yes
B	Carbohydrates	Sugar alcohols	Inositol catabolism	Transcriptional repressor of the myo-inositol catabolic operon DeoR family	<input type=&#39;button&#39; value=&#39;find&#39; onclick=&#39;window.open("?page=SearchGene&fr=Transcriptional repressor of the myo-inositol catabolic operon DeoR family&organism=59843.19&subsystem=Inositol_catabolism&template_gene=fig|6666666.640629.peg.1970");&#39;>	no	<a href=&#39;?page=Annotation&feature=fig|6666666.640629.peg.1970&#39; target=_blank>fig|6666666.640629.peg.1970</a>	yes
A and B	Carbohydrates	no subcategory	Carbon storage regulator	Carbon storage regulator	<a href=&#39;?page=Annotation&feature=fig|59843.19.peg.1521&#39; target=_blank>fig|59843.19.peg.1521</a>	yes	<a href=&#39;?page=Annotation&feature=fig|6666666.640629.peg.929&#39; target=_blank>fig|6666666.640629.peg.929</a>	yes
B	Carbohydrates	no subcategory	Carbon storage regulator	Flagellar assembly factor FliW	<input type=&#39;button&#39; value=&#39;find&#39; onclick=&#39;window.open("?page=SearchGene&fr=Flagellar assembly factor FliW&organism=59843.19&subsystem=Carbon_storage_regulator&template_gene=fig|6666666.640629.peg.930");&#39;>	no	<a href=&#39;?page=Annotation&feature=fig|6666666.640629.peg.930&#39; target=_blank>fig|6666666.640629.peg.930</a>	yes
A and B	Cell Division and Cell Cycle	Checkpoint control	Bacterial checkpoint-control-related cluster	Bacterial checkpoint controller DisA with nucleotide-binding domain	<a href=&#39;?page=Annotation&feature=fig|59843.19.peg.1338&#39; target=_blank>fig|59843.19.peg.1338</a>, <a href=&#39;?page=Annotation&feature=fig|59843.19.peg.4951&#39; target=_blank>fig|59843.19.peg.4951</a>	yes	<a href=&#39;?page=Annotation&feature=fig|6666666.640629.peg.3918&#39; target=_blank>fig|6666666.640629.peg.3918</a>	yes
A and B	Cell Division and Cell Cycle	Checkpoint control	Bacterial checkpoint-control-related cluster	Diadenylate cyclase spyDAC	<a href=&#39;?page=Annotation&feature=fig|59843.19.peg.1338&#39; target=_blank>fig|59843.19.peg.1338</a>, <a href=&#39;?page=Annotation&feature=fig|59843.19.peg.4951&#39; target=_blank>fig|59843.19.peg.4951</a>	yes	<a href=&#39;?page=Annotation&feature=fig|6666666.640629.peg.3918&#39; target=_blank>fig|6666666.640629.peg.3918</a>	yes
A and B	Cell Division and Cell Cycle	Checkpoint control	Bacterial checkpoint-control-related cluster	Phosphoglucosamine mutase (EC 5.4.2.10)	<a href=&#39;?page=Annotation&feature=fig|59843.19.peg.1336&#39; target=_blank>fig|59843.19.peg.1336</a>	yes	<a href=&#39;?page=Annotation&feature=fig|6666666.640629.peg.3920&#39; target=_blank>fig|6666666.640629.peg.3920</a>	yes
A	Cell Division and Cell Cycle	Checkpoint control	Bacterial checkpoint-control-related cluster	Uncharacterized secreted protein associated with spyDAC	<a href=&#39;?page=Annotation&feature=fig|59843.19.peg.2387&#39; target=_blank>fig|59843.19.peg.2387</a>	yes	<input type=&#39;button&#39; class=&#39;button&#39; value=&#39;find&#39; onclick=&#39;window.open("?page=SearchGene&fr=Uncharacterized secreted protein associated with spyDAC&organism=6666666.640629&subsystem=Bacterial_checkpoint-control-related_cluster&template_gene=fig|59843.19.peg.2387");&#39;>	no
A and B	Cell Wall and Capsule	Capsular and extracellular polysacchrides	Polysaccharide deacetylases	Peptidoglycan N-acetylglucosamine deacetylase (EC 3.5.1.-)	<a href=&#39;?page=Annotation&feature=fig|59843.19.peg.1838&#39; target=_blank>fig|59843.19.peg.1838</a>, <a href=&#39;?page=Annotation&feature=fig|59843.19.peg.3776&#39; target=_blank>fig|59843.19.peg.3776</a>, <a href=&#39;?page=Annotation&feature=fig|59843.19.peg.4106&#39; target=_blank>fig|59843.19.peg.4106</a>, <a href=&#39;?page=Annotation&feature=fig|59843.19.peg.4362&#39; target=_blank>fi…	yes	<a href=&#39;?page=Annotation&feature=fig|6666666.640629.peg.438&#39; target=_blank>fig|6666666.640629.peg.438</a>	yes
A and B	Cell Wall and Capsule	Capsular and extracellular polysacchrides	Polysaccharide deacetylases	Polysaccharide deacetylase	<a href=&#39;?page=Annotation&feature=fig|59843.19.peg.3974&#39; target=_blank>fig|59843.19.peg.3974</a>, <a href=&#39;?page=Annotation&feature=fig|59843.19.peg.4698&#39; target=_blank>fig|59843.19.peg.4698</a>	yes	<a href=&#39;?page=Annotation&feature=fig|6666666.640629.peg.2257&#39; target=_blank>fig|6666666.640629.peg.2257</a>	yes
A	Cell Wall and Capsule	Capsular and extracellular polysacchrides	Rhamnose containing glycans	Alpha-L-Rha alpha-1,3-L-rhamnosyltransferase (EC 2.4.1.-)	<a href=&#39;?page=Annotation&feature=fig|59843.19.peg.1451&#39; target=_blank>fig|59843.19.peg.1451</a>	yes	<input type=&#39;button&#39; class=&#39;button&#39; value=&#39;find&#39; onclick=&#39;window.open("?page=SearchGene&fr=Alpha-L-Rha alpha-1,3-L-rhamnosyltransferase (EC 2.4.1.-)&organism=6666666.640629&subsystem=Rhamnose_containing_glycans&template_gene=fig|59843.19.peg.1451");&#39;>	no
A	Cell Wall and Capsule	Capsular and extracellular polysacchrides	Rhamnose containing glycans	Glucose-1-phosphate thymidylyltransferase (EC 2.7.7.24)	<a href=&#39;?page=Annotation&feature=fig|59843.19.peg.1455&#39; target=_blank>fig|59843.19.peg.1455</a>, <a href=&#39;?page=Annotation&feature=fig|59843.19.peg.3350&#39; target=_blank>fig|59843.19.peg.3350</a>	yes	<input type=&#39;button&#39; class=&#39;button&#39; value=&#39;find&#39; onclick=&#39;window.open("?page=SearchGene&fr=Glucose-1-phosphate thymidylyltransferase (EC 2.7.7.24)&organism=6666666.640629&subsystem=Rhamnose_containing_glycans&template_gene=fig|59843.19.peg.1455");&#39;>	no
A	Cell Wall and Capsule	Capsular and extracellular polysacchrides	Rhamnose containing glycans	dTDP-4-dehydrorhamnose 3,5-epimerase (EC 5.1.3.13)	<a href=&#39;?page=Annotation&feature=fig|59843.19.peg.1454&#39; target=_blank>fig|59843.19.peg.1454</a>	yes	<input type=&#39;button&#39; class=&#39;button&#39; value=&#39;find&#39; onclick=&#39;window.open("?page=SearchGene&fr=dTDP-4-dehydrorhamnose 3,5-epimerase (EC 5.1.3.13)&organism=6666666.640629&subsystem=Rhamnose_containing_glycans&template_gene=fig|59843.19.peg.1454");&#39;>	no
A	Cell Wall and Capsule	Capsular and extracellular polysacchrides	Rhamnose containing glycans	dTDP-4-dehydrorhamnose reductase (EC 1.1.1.133)	<a href=&#39;?page=Annotation&feature=fig|59843.19.peg.1452&#39; target=_blank>fig|59843.19.peg.1452</a>, <a href=&#39;?page=Annotation&feature=fig|59843.19.peg.3361&#39; target=_blank>fig|59843.19.peg.3361</a>	yes	<input type=&#39;button&#39; class=&#39;button&#39; value=&#39;find&#39; onclick=&#39;window.open("?page=SearchGene&fr=dTDP-4-dehydrorhamnose reductase (EC 1.1.1.133)&organism=6666666.640629&subsystem=Rhamnose_containing_glycans&template_gene=fig|59843.19.peg.1452");&#39;>	no
A	Cell Wall and Capsule	Capsular and extracellular polysacchrides	Rhamnose containing glycans	dTDP-glucose 4,6-dehydratase (EC 4.2.1.46)	<a href=&#39;?page=Annotation&feature=fig|59843.19.peg.1453&#39; target=_blank>fig|59843.19.peg.1453</a>	yes	<input type=&#39;button&#39; class=&#39;button&#39; value=&#39;find&#39; onclick=&#39;window.open("?page=SearchGene&fr=dTDP-glucose 4,6-dehydratase (EC 4.2.1.46)&organism=6666666.640629&subsystem=Rhamnose_containing_glycans&template_gene=fig|59843.19.peg.1453");&#39;>	no
A	Cell Wall and Capsule	Capsular and extracellular polysacchrides	Streptococcal Hyaluronic Acid Capsule	Hyaluronan synthase (EC 2.4.1.212)	<a href=&#39;?page=Annotation&feature=fig|59843.19.peg.3973&#39; target=_blank>fig|59843.19.peg.3973</a>	yes	<input type=&#39;button&#39; class=&#39;button&#39; value=&#39;find&#39; onclick=&#39;window.open("?page=SearchGene&fr=Hyaluronan synthase (EC 2.4.1.212)&organism=6666666.640629&subsystem=Streptococcal_Hyaluronic_Acid_Capsule&template_gene=fig|59843.19.peg.3973");&#39;>	no
B	Cell Wall and Capsule	Capsular and extracellular polysacchrides	CMP-N-acetylneuraminate Biosynthesis	N-acetylneuraminate synthase (EC 2.5.1.56)	<input type=&#39;button&#39; value=&#39;find&#39; onclick=&#39;window.open("?page=SearchGene&fr=N-acetylneuraminate synthase (EC 2.5.1.56)&organism=59843.19&subsystem=CMP-N-acetylneuraminate_Biosynthesis&template_gene=fig|6666666.640629.peg.1828");&#39;>	no	<a href=&#39;?page=Annotation&feature=fig|6666666.640629.peg.1828&#39; target=_blank>fig|6666666.640629.peg.1828</a>	yes
A	Cell Wall and Capsule	Gram-Positive cell wall components	Teichoic and lipoteichoic acids biosynthesis	diglucosyldiacylglycerol synthase (LTA membrane anchor synthesis)	<a href=&#39;?page=Annotation&feature=fig|59843.19.peg.730&#39; target=_blank>fig|59843.19.peg.730</a>, <a href=&#39;?page=Annotation&feature=fig|59843.19.peg.962&#39; target=_blank>fig|59843.19.peg.962</a>, <a href=&#39;?page=Annotation&feature=fig|59843.19.peg.4965&#39; target=_blank>fig|59843.19.peg.4965</a>	yes	<input type=&#39;button&#39; class=&#39;button&#39; value=&#39;find&#39; onclick=&#39;window.open("?page=SearchGene&fr=diglucosyldiacylglycerol synthase (LTA membrane anchor synthesis)&organism=6666666.640629&subsystem=Teichoic_and_lipoteichoic_acids_biosynthesis&template_gene=fig|59843.19.peg.730");&#39;>	no
A	Cell Wall and Capsule	Gram-Positive cell wall components	Teichuronic acid biosynthesis	Putative N-acetylgalactosaminyl-diphosphoundecaprenol glucuronosyltransferase	<a href=&#39;?page=Annotation&feature=fig|59843.19.peg.5499&#39; target=_blank>fig|59843.19.peg.5499</a>	yes	<input type=&#39;button&#39; class=&#39;button&#39; value=&#39;find&#39; onclick=&#39;window.open("?page=SearchGene&fr=Putative N-acetylgalactosaminyl-diphosphoundecaprenol glucuronosyltransferase&organism=6666666.640629&subsystem=Teichuronic_acid_biosynthesis&template_gene=fig|59843.19.peg.5499");&#39;>	no
B	Cell Wall and Capsule	Gram-Positive cell wall components	Polyglycerolphosphate lipoteichoic acid biosynthesis	Lipoteichoic acid synthase LtaS Type IIIa	<input type=&#39;button&#39; value=&#39;find&#39; onclick=&#39;window.open("?page=SearchGene&fr=Lipoteichoic acid synthase LtaS Type IIIa&organism=59843.19&subsystem=Polyglycerolphosphate_lipoteichoic_acid_biosynthesis&template_gene=fig|6666666.640629.peg.328");&#39;>	no	<a href=&#39;?page=Annotation&feature=fig|6666666.640629.peg.328&#39; target=_blank>fig|6666666.640629.peg.328</a>, <a href=&#39;?page=Annotation&feature=fig|6666666.640629.peg.1883&#39; target=_blank>fig|6666666.640629.peg.1883</a>, <a href=&#39;?page=Annotation&feature=fig|6666666.640629.peg.4210&#39; target=_blank>fig|6666666.640629.peg.4210</a>	yes
A and B	Cell Wall and Capsule	no subcategory	Murein Hydrolases	D-alanyl-D-alanine carboxypeptidase (EC 3.4.16.4)	<a href=&#39;?page=Annotation&feature=fig|59843.19.peg.1645&#39; target=_blank>fig|59843.19.peg.1645</a>, <a href=&#39;?page=Annotation&feature=fig|59843.19.peg.1927&#39; target=_blank>fig|59843.19.peg.1927</a>, <a href=&#39;?page=Annotation&feature=fig|59843.19.peg.2063&#39; target=_blank>fig|59843.19.peg.2063</a>, <a href=&#39;?page=Annotation&feature=fig|59843.19.peg.2706&#39; target=_blank>fi…	yes	<a href=&#39;?page=Annotation&feature=fig|6666666.640629.peg.1364&#39; target=_blank>fig|6666666.640629.peg.1364</a>, <a href=&#39;?page=Annotation&feature=fig|6666666.640629.peg.1548&#39; target=_blank>fig|6666666.640629.peg.1548</a>, <a href=&#39;?page=Annotation&feature=fig|6666666.640629.peg.2558&#39; target=_blank>fig|6666666.640629.peg.2558</a>, <a href=&#39;?page=Annotation&feature=fig|666…	yes
A and B	Cell Wall and Capsule	no subcategory	Murein Hydrolases	N-acetylmuramoyl-L-alanine amidase (EC 3.5.1.28)	<a href=&#39;?page=Annotation&feature=fig|59843.19.peg.186&#39; target=_blank>fig|59843.19.peg.186</a>, <a href=&#39;?page=Annotation&feature=fig|59843.19.peg.1350&#39; target=_blank>fig|59843.19.peg.1350</a>, <a href=&#39;?page=Annotation&feature=fig|59843.19.peg.2669&#39; target=_blank>fig|59843.19.peg.2669</a>, <a href=&#39;?page=Annotation&feature=fig|59843.19.peg.4210&#39; target=_blank>fig|…	yes	<a href=&#39;?page=Annotation&feature=fig|6666666.640629.peg.211&#39; target=_blank>fig|6666666.640629.peg.211</a>, <a href=&#39;?page=Annotation&feature=fig|6666666.640629.peg.2642&#39; target=_blank>fig|6666666.640629.peg.2642</a>, <a href=&#39;?page=Annotation&feature=fig|6666666.640629.peg.3139&#39; target=_blank>fig|6666666.640629.peg.3139</a>, <a href=&#39;?page=Annotation&feature=fig|66666…	yes
A and B	Cell Wall and Capsule	no subcategory	Recycling of Peptidoglycan Amino Acids	N-acetylmuramoyl-L-alanine amidase (EC 3.5.1.28)	<a href=&#39;?page=Annotation&feature=fig|59843.19.peg.186&#39; target=_blank>fig|59843.19.peg.186</a>, <a href=&#39;?page=Annotation&feature=fig|59843.19.peg.1350&#39; target=_blank>fig|59843.19.peg.1350</a>, <a href=&#39;?page=Annotation&feature=fig|59843.19.peg.2669&#39; target=_blank>fig|59843.19.peg.2669</a>, <a href=&#39;?page=Annotation&feature=fig|59843.19.peg.4210&#39; target=_blank>fig|…	yes	<a href=&#39;?page=Annotation&feature=fig|6666666.640629.peg.211&#39; target=_blank>fig|6666666.640629.peg.211</a>, <a href=&#39;?page=Annotation&feature=fig|6666666.640629.peg.2642&#39; target=_blank>fig|6666666.640629.peg.2642</a>, <a href=&#39;?page=Annotation&feature=fig|6666666.640629.peg.3139&#39; target=_blank>fig|6666666.640629.peg.3139</a>, <a href=&#39;?page=Annotation&feature=fig|66666…	yes
A and B	Cell Wall and Capsule	no subcategory	UDP-N-acetylmuramate from Fructose-6-phosphate Biosynthesis	Glucosamine-1-phosphate N-acetyltransferase (EC 2.3.1.157)	<a href=&#39;?page=Annotation&feature=fig|59843.19.peg.2018&#39; target=_blank>fig|59843.19.peg.2018</a>	yes	<a href=&#39;?page=Annotation&feature=fig|6666666.640629.peg.4281&#39; target=_blank>fig|6666666.640629.peg.4281</a>	yes
A and B	Cell Wall and Capsule	no subcategory	UDP-N-acetylmuramate from Fructose-6-phosphate Biosynthesis	N-acetylglucosamine-1-phosphate uridyltransferase (EC 2.7.7.23)	<a href=&#39;?page=Annotation&feature=fig|59843.19.peg.2018&#39; target=_blank>fig|59843.19.peg.2018</a>	yes	<a href=&#39;?page=Annotation&feature=fig|6666666.640629.peg.4281&#39; target=_blank>fig|6666666.640629.peg.4281</a>	yes
A and B	Cell Wall and Capsule	no subcategory	UDP-N-acetylmuramate from Fructose-6-phosphate Biosynthesis	Phosphoglucosamine mutase (EC 5.4.2.10)	<a href=&#39;?page=Annotation&feature=fig|59843.19.peg.1336&#39; target=_blank>fig|59843.19.peg.1336</a>	yes	<a href=&#39;?page=Annotation&feature=fig|6666666.640629.peg.3920&#39; target=_blank>fig|6666666.640629.peg.3920</a>	yes
A and B	Cell Wall and Capsule	no subcategory	UDP-N-acetylmuramate from Fructose-6-phosphate Biosynthesis	UDP-N-acetylglucosamine 1-carboxyvinyltransferase (EC 2.5.1.7)	<a href=&#39;?page=Annotation&feature=fig|59843.19.peg.1557&#39; target=_blank>fig|59843.19.peg.1557</a>, <a href=&#39;?page=Annotation&feature=fig|59843.19.peg.2108&#39; target=_blank>fig|59843.19.peg.2108</a>, <a href=&#39;?page=Annotation&feature=fig|59843.19.peg.3731&#39; target=_blank>fig|59843.19.peg.3731</a>	yes	<a href=&#39;?page=Annotation&feature=fig|6666666.640629.peg.3005&#39; target=_blank>fig|6666666.640629.peg.3005</a>, <a href=&#39;?page=Annotation&feature=fig|6666666.640629.peg.3038&#39; target=_blank>fig|6666666.640629.peg.3038</a>	yes
A	Cell Wall and Capsule	no subcategory	UDP-N-acetylmuramate from Fructose-6-phosphate Biosynthesis	UDP-N-acetylenolpyruvoylglucosamine reductase (EC 1.1.1.158)	<a href=&#39;?page=Annotation&feature=fig|59843.19.peg.5228&#39; target=_blank>fig|59843.19.peg.5228</a>	yes	<input type=&#39;button&#39; class=&#39;button&#39; value=&#39;find&#39; onclick=&#39;window.open("?page=SearchGene&fr=UDP-N-acetylenolpyruvoylglucosamine reductase (EC 1.1.1.158)&organism=6666666.640629&subsystem=UDP-N-acetylmuramate_from_Fructose-6-phosphate_Biosynthesis&template_gene=fig|59843.19.peg.5228");&#39;>	no
A and B	Clustering-based subsystems	2 proteases and a MoxR	CBSS-1140.3.peg.2017	FIG001454: Transglutaminase-like enzymes, putative cysteine proteases	<a href=&#39;?page=Annotation&feature=fig|59843.19.peg.3612&#39; target=_blank>fig|59843.19.peg.3612</a>	yes	<a href=&#39;?page=Annotation&feature=fig|6666666.640629.peg.1821&#39; target=_blank>fig|6666666.640629.peg.1821</a>	yes
A and B	Clustering-based subsystems	2 proteases and a MoxR	CBSS-1140.3.peg.2017	FIG002343: hypothetical protein	<a href=&#39;?page=Annotation&feature=fig|59843.19.peg.3611&#39; target=_blank>fig|59843.19.peg.3611</a>	yes	<a href=&#39;?page=Annotation&feature=fig|6666666.640629.peg.1822&#39; target=_blank>fig|6666666.640629.peg.1822</a>	yes
A and B	Clustering-based subsystems	2 proteases and a MoxR	CBSS-1140.3.peg.2017	FIG022979: MoxR-like ATPases	<a href=&#39;?page=Annotation&feature=fig|59843.19.peg.2877&#39; target=_blank>fig|59843.19.peg.2877</a>, <a href=&#39;?page=Annotation&feature=fig|59843.19.peg.3610&#39; target=_blank>fig|59843.19.peg.3610</a>, <a href=&#39;?page=Annotation&feature=fig|59843.19.peg.5259&#39; target=_blank>fig|59843.19.peg.5259</a>	yes	<a href=&#39;?page=Annotation&feature=fig|6666666.640629.peg.1823&#39; target=_blank>fig|6666666.640629.peg.1823</a>	yes
A and B	Clustering-based subsystems	Cell Division	Septum site-determining cluster Min	Septum site-determining protein MinC	<a href=&#39;?page=Annotation&feature=fig|59843.19.peg.3439&#39; target=_blank>fig|59843.19.peg.3439</a>	yes	<a href=&#39;?page=Annotation&feature=fig|6666666.640629.peg.176&#39; target=_blank>fig|6666666.640629.peg.176</a>	yes
A and B	Clustering-based subsystems	Cell Division	Septum site-determining cluster Min	Septum site-determining protein MinD	<a href=&#39;?page=Annotation&feature=fig|59843.19.peg.3440&#39; target=_blank>fig|59843.19.peg.3440</a>	yes	<a href=&#39;?page=Annotation&feature=fig|6666666.640629.peg.177&#39; target=_blank>fig|6666666.640629.peg.177</a>	yes
B	Clustering-based subsystems	Cell Division	Bacterial cell division cluster	Rod shape-determining protein MreC	<input type=&#39;button&#39; value=&#39;find&#39; onclick=&#39;window.open("?page=SearchGene&fr=Rod shape-determining protein MreC&organism=59843.19&subsystem=Bacterial_cell_division_cluster&template_gene=fig|6666666.640629.peg.174");&#39;>	no	<a href=&#39;?page=Annotation&feature=fig|6666666.640629.peg.174&#39; target=_blank>fig|6666666.640629.peg.174</a>	yes
B	Clustering-based subsystems	Cell Division	Bacterial cell division cluster	Rod shape-determining protein RodA	<input type=&#39;button&#39; value=&#39;find&#39; onclick=&#39;window.open("?page=SearchGene&fr=Rod shape-determining protein RodA&organism=59843.19&subsystem=Bacterial_cell_division_cluster&template_gene=fig|6666666.640629.peg.3924");&#39;>	no	<a href=&#39;?page=Annotation&feature=fig|6666666.640629.peg.3924&#39; target=_blank>fig|6666666.640629.peg.3924</a>	yes
B	Clustering-based subsystems	Cell Division	CBSS-393130.3.peg.794	Septation ring formation regulator EzrA	<input type=&#39;button&#39; value=&#39;find&#39; onclick=&#39;window.open("?page=SearchGene&fr=Septation ring formation regulator EzrA&organism=59843.19&subsystem=CBSS-393130.3.peg.794&template_gene=fig|6666666.640629.peg.46");&#39;>	no	<a href=&#39;?page=Annotation&feature=fig|6666666.640629.peg.46&#39; target=_blank>fig|6666666.640629.peg.46</a>	yes
A	Clustering-based subsystems	Chemotaxis, response regulators	CBSS-323850.3.peg.3142	diguanylate cyclase (GGDEF domain) with PAS/PAC sensor	<a href=&#39;?page=Annotation&feature=fig|59843.19.peg.1848&#39; target=_blank>fig|59843.19.peg.1848</a>	yes	<input type=&#39;button&#39; class=&#39;button&#39; value=&#39;find&#39; onclick=&#39;window.open("?page=SearchGene&fr=diguanylate cyclase (GGDEF domain) with PAS/PAC sensor&organism=6666666.640629&subsystem=CBSS-323850.3.peg.3142&template_gene=fig|59843.19.peg.1848");&#39;>	no
A and B	Clustering-based subsystems	Clustering-based subsystems	Sporulation-related Hypotheticals	MreB-like protein (Mbl protein)	<a href=&#39;?page=Annotation&feature=fig|59843.19.peg.1552&#39; target=_blank>fig|59843.19.peg.1552</a>	yes	<a href=&#39;?page=Annotation&feature=fig|6666666.640629.peg.3042&#39; target=_blank>fig|6666666.640629.peg.3042</a>, <a href=&#39;?page=Annotation&feature=fig|6666666.640629.peg.3231&#39; target=_blank>fig|6666666.640629.peg.3231</a>	yes
A and B	Clustering-based subsystems	Clustering-based subsystems	Sporulation-related Hypotheticals	Stage II sporulation protein D (SpoIID)	<a href=&#39;?page=Annotation&feature=fig|59843.19.peg.1555&#39; target=_blank>fig|59843.19.peg.1555</a>	yes	<a href=&#39;?page=Annotation&feature=fig|6666666.640629.peg.3039&#39; target=_blank>fig|6666666.640629.peg.3039</a>	yes
A and B	Clustering-based subsystems	Clustering-based subsystems	Sporulation-related Hypotheticals	Stage II sporulation protein related to metaloproteases (SpoIIQ)	<a href=&#39;?page=Annotation&feature=fig|59843.19.peg.1554&#39; target=_blank>fig|59843.19.peg.1554</a>	yes	<a href=&#39;?page=Annotation&feature=fig|6666666.640629.peg.3040&#39; target=_blank>fig|6666666.640629.peg.3040</a>	yes
A and B	Clustering-based subsystems	Clustering-based subsystems	Sporulation-related Hypotheticals	Stage III sporulation protein D	<a href=&#39;?page=Annotation&feature=fig|59843.19.peg.1553&#39; target=_blank>fig|59843.19.peg.1553</a>	yes	<a href=&#39;?page=Annotation&feature=fig|6666666.640629.peg.3041&#39; target=_blank>fig|6666666.640629.peg.3041</a>	yes
A and B	Clustering-based subsystems	Clustering-based subsystems	Sporulation-related Hypotheticals	UDP-N-acetylglucosamine 1-carboxyvinyltransferase (EC 2.5.1.7)	<a href=&#39;?page=Annotation&feature=fig|59843.19.peg.1557&#39; target=_blank>fig|59843.19.peg.1557</a>, <a href=&#39;?page=Annotation&feature=fig|59843.19.peg.2108&#39; target=_blank>fig|59843.19.peg.2108</a>, <a href=&#39;?page=Annotation&feature=fig|59843.19.peg.3731&#39; target=_blank>fig|59843.19.peg.3731</a>	yes	<a href=&#39;?page=Annotation&feature=fig|6666666.640629.peg.3005&#39; target=_blank>fig|6666666.640629.peg.3005</a>, <a href=&#39;?page=Annotation&feature=fig|6666666.640629.peg.3038&#39; target=_blank>fig|6666666.640629.peg.3038</a>	yes
A and B	Clustering-based subsystems	Cofactors	Riboflavin synthesis cluster	3,4-dihydroxy-2-butanone 4-phosphate synthase (EC 4.1.99.12)	<a href=&#39;?page=Annotation&feature=fig|59843.19.peg.4086&#39; target=_blank>fig|59843.19.peg.4086</a>	yes	<a href=&#39;?page=Annotation&feature=fig|6666666.640629.peg.4255&#39; target=_blank>fig|6666666.640629.peg.4255</a>	yes
A and B	Clustering-based subsystems	Cofactors	Riboflavin synthesis cluster	5-amino-6-(5-phosphoribosylamino)uracil reductase (EC 1.1.1.193)	<a href=&#39;?page=Annotation&feature=fig|59843.19.peg.4084&#39; target=_blank>fig|59843.19.peg.4084</a>	yes	<a href=&#39;?page=Annotation&feature=fig|6666666.640629.peg.4253&#39; target=_blank>fig|6666666.640629.peg.4253</a>	yes
A and B	Clustering-based subsystems	Cofactors	Riboflavin synthesis cluster	6,7-dimethyl-8-ribityllumazine synthase (EC 2.5.1.78)	<a href=&#39;?page=Annotation&feature=fig|59843.19.peg.4087&#39; target=_blank>fig|59843.19.peg.4087</a>	yes	<a href=&#39;?page=Annotation&feature=fig|6666666.640629.peg.4256&#39; target=_blank>fig|6666666.640629.peg.4256</a>	yes
A and B	Clustering-based subsystems	Cofactors	Riboflavin synthesis cluster	Diacylglycerol kinase (EC 2.7.1.107)	<a href=&#39;?page=Annotation&feature=fig|59843.19.peg.3672&#39; target=_blank>fig|59843.19.peg.3672</a>	yes	<a href=&#39;?page=Annotation&feature=fig|6666666.640629.peg.283&#39; target=_blank>fig|6666666.640629.peg.283</a>	yes
A and B	Clustering-based subsystems	Cofactors	Riboflavin synthesis cluster	Diaminohydroxyphosphoribosylaminopyrimidine deaminase (EC 3.5.4.26)	<a href=&#39;?page=Annotation&feature=fig|59843.19.peg.4084&#39; target=_blank>fig|59843.19.peg.4084</a>	yes	<a href=&#39;?page=Annotation&feature=fig|6666666.640629.peg.4253&#39; target=_blank>fig|6666666.640629.peg.4253</a>	yes
A and B	Clustering-based subsystems	Cofactors	Riboflavin synthesis cluster	GTP cyclohydrolase II (EC 3.5.4.25)	<a href=&#39;?page=Annotation&feature=fig|59843.19.peg.4086&#39; target=_blank>fig|59843.19.peg.4086</a>	yes	<a href=&#39;?page=Annotation&feature=fig|6666666.640629.peg.4255&#39; target=_blank>fig|6666666.640629.peg.4255</a>	yes
A and B	Clustering-based subsystems	Cofactors	Riboflavin synthesis cluster	NADH dehydrogenase (EC 1.6.99.3)	<a href=&#39;?page=Annotation&feature=fig|59843.19.peg.1056&#39; target=_blank>fig|59843.19.peg.1056</a>, <a href=&#39;?page=Annotation&feature=fig|59843.19.peg.1067&#39; target=_blank>fig|59843.19.peg.1067</a>, <a href=&#39;?page=Annotation&feature=fig|59843.19.peg.1625&#39; target=_blank>fig|59843.19.peg.1625</a>, <a href=&#39;?page=Annotation&feature=fig|59843.19.peg.2396&#39; target=_blank>fi…	yes	<a href=&#39;?page=Annotation&feature=fig|6666666.640629.peg.724&#39; target=_blank>fig|6666666.640629.peg.724</a>, <a href=&#39;?page=Annotation&feature=fig|6666666.640629.peg.1859&#39; target=_blank>fig|6666666.640629.peg.1859</a>, <a href=&#39;?page=Annotation&feature=fig|6666666.640629.peg.2861&#39; target=_blank>fig|6666666.640629.peg.2861</a>, <a href=&#39;?page=Annotation&feature=fig|66666…	yes
A and B	Clustering-based subsystems	Cofactors	Riboflavin synthesis cluster	Orotidine 5&#39;-phosphate decarboxylase (EC 4.1.1.23)	<a href=&#39;?page=Annotation&feature=fig|59843.19.peg.3760&#39; target=_blank>fig|59843.19.peg.3760</a>	yes	<a href=&#39;?page=Annotation&feature=fig|6666666.640629.peg.2350&#39; target=_blank>fig|6666666.640629.peg.2350</a>	yes
A and B	Clustering-based subsystems	Cofactors	Riboflavin synthesis cluster	Phosphoribosyl-ATP pyrophosphatase (EC 3.6.1.31)	<a href=&#39;?page=Annotation&feature=fig|59843.19.peg.2132&#39; target=_blank>fig|59843.19.peg.2132</a>	yes	<a href=&#39;?page=Annotation&feature=fig|6666666.640629.peg.864&#39; target=_blank>fig|6666666.640629.peg.864</a>	yes
A and B	Clustering-based subsystems	Cofactors	Riboflavin synthesis cluster	Riboflavin synthase eubacterial/eukaryotic (EC 2.5.1.9)	<a href=&#39;?page=Annotation&feature=fig|59843.19.peg.4085&#39; target=_blank>fig|59843.19.peg.4085</a>	yes	<a href=&#39;?page=Annotation&feature=fig|6666666.640629.peg.4254&#39; target=_blank>fig|6666666.640629.peg.4254</a>	yes
A and B	Clustering-based subsystems	Cofactors	Riboflavin synthesis cluster	Ribulose-phosphate 3-epimerase (EC 5.1.3.1)	<a href=&#39;?page=Annotation&feature=fig|59843.19.peg.3890&#39; target=_blank>fig|59843.19.peg.3890</a>	yes	<a href=&#39;?page=Annotation&feature=fig|6666666.640629.peg.2368&#39; target=_blank>fig|6666666.640629.peg.2368</a>, <a href=&#39;?page=Annotation&feature=fig|6666666.640629.peg.3651&#39; target=_blank>fig|6666666.640629.peg.3651</a>	yes
A and B	Clustering-based subsystems	Cofactors	Riboflavin synthesis cluster	Transcription termination protein NusB	<a href=&#39;?page=Annotation&feature=fig|59843.19.peg.4036&#39; target=_blank>fig|59843.19.peg.4036</a>	yes	<a href=&#39;?page=Annotation&feature=fig|6666666.640629.peg.372&#39; target=_blank>fig|6666666.640629.peg.372</a>	yes
A and B	Clustering-based subsystems	DNA metabolism	Rad50-Mre11 DNA repair cluster	Exonuclease SbcC	<a href=&#39;?page=Annotation&feature=fig|59843.19.peg.3660&#39; target=_blank>fig|59843.19.peg.3660</a>	yes	<a href=&#39;?page=Annotation&feature=fig|6666666.640629.peg.2438&#39; target=_blank>fig|6666666.640629.peg.2438</a>	yes
A and B	Clustering-based subsystems	DNA metabolism	Rad50-Mre11 DNA repair cluster	Exonuclease SbcD	<a href=&#39;?page=Annotation&feature=fig|59843.19.peg.3659&#39; target=_blank>fig|59843.19.peg.3659</a>	yes	<a href=&#39;?page=Annotation&feature=fig|6666666.640629.peg.2439&#39; target=_blank>fig|6666666.640629.peg.2439</a>	yes
A	Clustering-based subsystems	DNA metabolism	Rad50-Mre11 DNA repair cluster	3&#39;->5&#39; exoribonuclease Bsu YhaM	<a href=&#39;?page=Annotation&feature=fig|59843.19.peg.407&#39; target=_blank>fig|59843.19.peg.407</a>	yes	<input type=&#39;button&#39; class=&#39;button&#39; value=&#39;find&#39; onclick=&#39;window.open("?page=SearchGene&fr=3%27->5%27 exoribonuclease Bsu YhaM&organism=6666666.640629&subsystem=Rad50-Mre11_DNA_repair_cluster&template_gene=fig|59843.19.peg.407");&#39;>	no
B	Clustering-based subsystems	DNA metabolism	Rad50-Mre11 DNA repair cluster	DNA double-strand break repair protein Mre11	<input type=&#39;button&#39; value=&#39;find&#39; onclick=&#39;window.open("?page=SearchGene&fr=DNA double-strand break repair protein Mre11&organism=59843.19&subsystem=Rad50-Mre11_DNA_repair_cluster&template_gene=fig|6666666.640629.peg.1384");&#39;>	no	<a href=&#39;?page=Annotation&feature=fig|6666666.640629.peg.1384&#39; target=_blank>fig|6666666.640629.peg.1384</a>	yes
A and B	Clustering-based subsystems	Isoprenoid/cell wall biosynthesis: PREDICTED UNDECAPRENYL DIPHOSPHATE PHOSPHATASE	CBSS-83331.1.peg.3039	1-deoxy-D-xylulose 5-phosphate reductoisomerase (EC 1.1.1.267)	<a href=&#39;?page=Annotation&feature=fig|59843.19.peg.5423&#39; target=_blank>fig|59843.19.peg.5423</a>	yes	<a href=&#39;?page=Annotation&feature=fig|6666666.640629.peg.3457&#39; target=_blank>fig|6666666.640629.peg.3457</a>	yes
A and B	Clustering-based subsystems	Isoprenoid/cell wall biosynthesis: PREDICTED UNDECAPRENYL DIPHOSPHATE PHOSPHATASE	CBSS-83331.1.peg.3039	Cell division protein FtsI [Peptidoglycan synthetase] (EC 2.4.1.129)	<a href=&#39;?page=Annotation&feature=fig|59843.19.peg.3722&#39; target=_blank>fig|59843.19.peg.3722</a>, <a href=&#39;?page=Annotation&feature=fig|59843.19.peg.3723&#39; target=_blank>fig|59843.19.peg.3723</a>	yes	<a href=&#39;?page=Annotation&feature=fig|6666666.640629.peg.1884&#39; target=_blank>fig|6666666.640629.peg.1884</a>, <a href=&#39;?page=Annotation&feature=fig|6666666.640629.peg.2315&#39; target=_blank>fig|6666666.640629.peg.2315</a>, <a href=&#39;?page=Annotation&feature=fig|6666666.640629.peg.2316&#39; target=_blank>fig|6666666.640629.peg.2316</a>	yes
A and B	Clustering-based subsystems	Isoprenoid/cell wall biosynthesis: PREDICTED UNDECAPRENYL DIPHOSPHATE PHOSPHATASE	CBSS-83331.1.peg.3039	Undecaprenyl diphosphate synthase (EC 2.5.1.31)	<a href=&#39;?page=Annotation&feature=fig|59843.19.peg.5425&#39; target=_blank>fig|59843.19.peg.5425</a>	yes	<a href=&#39;?page=Annotation&feature=fig|6666666.640629.peg.3455&#39; target=_blank>fig|6666666.640629.peg.3455</a>	yes
B	Clustering-based subsystems	Isoprenoid/cell wall biosynthesis: PREDICTED UNDECAPRENYL DIPHOSPHATE PHOSPHATASE	CBSS-83331.1.peg.3039	Penicillin-binding protein 3	<input type=&#39;button&#39; value=&#39;find&#39; onclick=&#39;window.open("?page=SearchGene&fr=Penicillin-binding protein 3&organism=59843.19&subsystem=CBSS-83331.1.peg.3039&template_gene=fig|6666666.640629.peg.1846");&#39;>	no	<a href=&#39;?page=Annotation&feature=fig|6666666.640629.peg.1846&#39; target=_blank>fig|6666666.640629.peg.1846</a>	yes
A and B	Clustering-based subsystems	Lysine, threonine, methionine, and cysteine	CBSS-84588.1.peg.1247	Cysteine desulfurase (EC 2.8.1.7)	<a href=&#39;?page=Annotation&feature=fig|59843.19.peg.1966&#39; target=_blank>fig|59843.19.peg.1966</a>, <a href=&#39;?page=Annotation&feature=fig|59843.19.peg.3501&#39; target=_blank>fig|59843.19.peg.3501</a>	yes	<a href=&#39;?page=Annotation&feature=fig|6666666.640629.peg.220&#39; target=_blank>fig|6666666.640629.peg.220</a>, <a href=&#39;?page=Annotation&feature=fig|6666666.640629.peg.3992&#39; target=_blank>fig|6666666.640629.peg.3992</a>	yes
A and B	Clustering-based subsystems	Lysine, threonine, methionine, and cysteine	CBSS-84588.1.peg.1247	D-alanyl-D-alanine carboxypeptidase (EC 3.4.16.4)	<a href=&#39;?page=Annotation&feature=fig|59843.19.peg.1645&#39; target=_blank>fig|59843.19.peg.1645</a>, <a href=&#39;?page=Annotation&feature=fig|59843.19.peg.1927&#39; target=_blank>fig|59843.19.peg.1927</a>, <a href=&#39;?page=Annotation&feature=fig|59843.19.peg.2063&#39; target=_blank>fig|59843.19.peg.2063</a>, <a href=&#39;?page=Annotation&feature=fig|59843.19.peg.2706&#39; target=_blank>fi…	yes	<a href=&#39;?page=Annotation&feature=fig|6666666.640629.peg.1364&#39; target=_blank>fig|6666666.640629.peg.1364</a>, <a href=&#39;?page=Annotation&feature=fig|6666666.640629.peg.1548&#39; target=_blank>fig|6666666.640629.peg.1548</a>, <a href=&#39;?page=Annotation&feature=fig|6666666.640629.peg.2558&#39; target=_blank>fig|6666666.640629.peg.2558</a>, <a href=&#39;?page=Annotation&feature=fig|666…	yes
A and B	Clustering-based subsystems	Lysine, threonine, methionine, and cysteine	CBSS-84588.1.peg.1247	Diaminopimelate epimerase (EC 5.1.1.7)	<a href=&#39;?page=Annotation&feature=fig|59843.19.peg.3875&#39; target=_blank>fig|59843.19.peg.3875</a>	yes	<a href=&#39;?page=Annotation&feature=fig|6666666.640629.peg.2075&#39; target=_blank>fig|6666666.640629.peg.2075</a>	yes
A and B	Clustering-based subsystems	May be related to ADP-phosphoribose and NAD-dependent acetylation	CBSS-216591.1.peg.168	ADP-ribose pyrophosphatase (EC 3.6.1.13)	<a href=&#39;?page=Annotation&feature=fig|59843.19.peg.3864&#39; target=_blank>fig|59843.19.peg.3864</a>, <a href=&#39;?page=Annotation&feature=fig|59843.19.peg.4066&#39; target=_blank>fig|59843.19.peg.4066</a>, <a href=&#39;?page=Annotation&feature=fig|59843.19.peg.5369&#39; target=_blank>fig|59843.19.peg.5369</a>	yes	<a href=&#39;?page=Annotation&feature=fig|6666666.640629.peg.2588&#39; target=_blank>fig|6666666.640629.peg.2588</a>	yes
A and B	Clustering-based subsystems	May be related to ADP-phosphoribose and NAD-dependent acetylation	CBSS-216591.1.peg.168	Aspartate aminotransferase (EC 2.6.1.1)	<a href=&#39;?page=Annotation&feature=fig|59843.19.peg.306&#39; target=_blank>fig|59843.19.peg.306</a>, <a href=&#39;?page=Annotation&feature=fig|59843.19.peg.308&#39; target=_blank>fig|59843.19.peg.308</a>, <a href=&#39;?page=Annotation&feature=fig|59843.19.peg.422&#39; target=_blank>fig|59843.19.peg.422</a>, <a href=&#39;?page=Annotation&feature=fig|59843.19.peg.640&#39; target=_blank>fig|59843…	yes	<a href=&#39;?page=Annotation&feature=fig|6666666.640629.peg.518&#39; target=_blank>fig|6666666.640629.peg.518</a>, <a href=&#39;?page=Annotation&feature=fig|6666666.640629.peg.1220&#39; target=_blank>fig|6666666.640629.peg.1220</a>, <a href=&#39;?page=Annotation&feature=fig|6666666.640629.peg.2473&#39; target=_blank>fig|6666666.640629.peg.2473</a>	yes
A and B	Clustering-based subsystems	May be related to ADP-phosphoribose and NAD-dependent acetylation	CBSS-216591.1.peg.168	Aspartokinase (EC 2.7.2.4)	<a href=&#39;?page=Annotation&feature=fig|59843.19.peg.4021&#39; target=_blank>fig|59843.19.peg.4021</a>, <a href=&#39;?page=Annotation&feature=fig|59843.19.peg.5402&#39; target=_blank>fig|59843.19.peg.5402</a>	yes	<a href=&#39;?page=Annotation&feature=fig|6666666.640629.peg.385&#39; target=_blank>fig|6666666.640629.peg.385</a>, <a href=&#39;?page=Annotation&feature=fig|6666666.640629.peg.2843&#39; target=_blank>fig|6666666.640629.peg.2843</a>, <a href=&#39;?page=Annotation&feature=fig|6666666.640629.peg.3478&#39; target=_blank>fig|6666666.640629.peg.3478</a>	yes
A and B	Clustering-based subsystems	May be related to ADP-phosphoribose and NAD-dependent acetylation	CBSS-216591.1.peg.168	Competence protein F homolog, phosphoribosyltransferase domain	<a href=&#39;?page=Annotation&feature=fig|59843.19.peg.1529&#39; target=_blank>fig|59843.19.peg.1529</a>	yes	<a href=&#39;?page=Annotation&feature=fig|6666666.640629.peg.937&#39; target=_blank>fig|6666666.640629.peg.937</a>	yes
A	Clustering-based subsystems	May be related to ADP-phosphoribose and NAD-dependent acetylation	CBSS-216591.1.peg.168	Alpha-ribazole-5&#39;-phosphate phosphatase (EC 3.1.3.73)	<a href=&#39;?page=Annotation&feature=fig|59843.19.peg.776&#39; target=_blank>fig|59843.19.peg.776</a>	yes	<input type=&#39;button&#39; class=&#39;button&#39; value=&#39;find&#39; onclick=&#39;window.open("?page=SearchGene&fr=Alpha-ribazole-5%27-phosphate phosphatase (EC 3.1.3.73)&organism=6666666.640629&subsystem=CBSS-216591.1.peg.168&template_gene=fig|59843.19.peg.776");&#39;>	no
A	Clustering-based subsystems	May be related to ADP-phosphoribose and NAD-dependent acetylation	CBSS-216591.1.peg.168	Histone acetyltransferase HPA2 and related acetyltransferases	<a href=&#39;?page=Annotation&feature=fig|59843.19.peg.4852&#39; target=_blank>fig|59843.19.peg.4852</a>	yes	<input type=&#39;button&#39; class=&#39;button&#39; value=&#39;find&#39; onclick=&#39;window.open("?page=SearchGene&fr=Histone acetyltransferase HPA2 and related acetyltransferases&organism=6666666.640629&subsystem=CBSS-216591.1.peg.168&template_gene=fig|59843.19.peg.4852");&#39;>	no
A and B	Clustering-based subsystems	Phosphate metabolism	PhoR-PhoB two-component regulatory system	Phosphate regulon sensor protein PhoR (SphS) (EC 2.7.13.3)	<a href=&#39;?page=Annotation&feature=fig|59843.19.peg.495&#39; target=_blank>fig|59843.19.peg.495</a>, <a href=&#39;?page=Annotation&feature=fig|59843.19.peg.4588&#39; target=_blank>fig|59843.19.peg.4588</a>	yes	<a href=&#39;?page=Annotation&feature=fig|6666666.640629.peg.89&#39; target=_blank>fig|6666666.640629.peg.89</a>	yes
A and B	Clustering-based subsystems	Phosphate metabolism	PhoR-PhoB two-component regulatory system	Phosphate regulon transcriptional regulatory protein PhoB (SphR)	<a href=&#39;?page=Annotation&feature=fig|59843.19.peg.4352&#39; target=_blank>fig|59843.19.peg.4352</a>, <a href=&#39;?page=Annotation&feature=fig|59843.19.peg.4490&#39; target=_blank>fig|59843.19.peg.4490</a>, <a href=&#39;?page=Annotation&feature=fig|59843.19.peg.4587&#39; target=_blank>fig|59843.19.peg.4587</a>, <a href=&#39;?page=Annotation&feature=fig|59843.19.peg.4618&#39; target=_blank>fi…	yes	<a href=&#39;?page=Annotation&feature=fig|6666666.640629.peg.3002&#39; target=_blank>fig|6666666.640629.peg.3002</a>, <a href=&#39;?page=Annotation&feature=fig|6666666.640629.peg.4354&#39; target=_blank>fig|6666666.640629.peg.4354</a>	yes
A and B	Clustering-based subsystems	Probably GTP or GMP signaling related	CBSS-176299.4.peg.1292	DNA recombination and repair protein RecO	<a href=&#39;?page=Annotation&feature=fig|59843.19.peg.3676&#39; target=_blank>fig|59843.19.peg.3676</a>	yes	<a href=&#39;?page=Annotation&feature=fig|6666666.640629.peg.286&#39; target=_blank>fig|6666666.640629.peg.286</a>	yes
A and B	Clustering-based subsystems	Probably GTP or GMP signaling related	CBSS-176299.4.peg.1292	DNA-directed RNA polymerase omega subunit (EC 2.7.7.6)	<a href=&#39;?page=Annotation&feature=fig|59843.19.peg.3880&#39; target=_blank>fig|59843.19.peg.3880</a>	yes	<a href=&#39;?page=Annotation&feature=fig|6666666.640629.peg.2359&#39; target=_blank>fig|6666666.640629.peg.2359</a>	yes
A and B	Clustering-based subsystems	Probably GTP or GMP signaling related	CBSS-176299.4.peg.1292	GTP pyrophosphokinase (EC 2.7.6.5), (p)ppGpp synthetase II	<a href=&#39;?page=Annotation&feature=fig|59843.19.peg.3480&#39; target=_blank>fig|59843.19.peg.3480</a>	yes	<a href=&#39;?page=Annotation&feature=fig|6666666.640629.peg.209&#39; target=_blank>fig|6666666.640629.peg.209</a>, <a href=&#39;?page=Annotation&feature=fig|6666666.640629.peg.3950&#39; target=_blank>fig|6666666.640629.peg.3950</a>	yes
A and B	Clustering-based subsystems	Probably GTP or GMP signaling related	CBSS-176299.4.peg.1292	GTP-binding protein Era	<a href=&#39;?page=Annotation&feature=fig|59843.19.peg.3674&#39; target=_blank>fig|59843.19.peg.3674</a>	yes	<a href=&#39;?page=Annotation&feature=fig|6666666.640629.peg.284&#39; target=_blank>fig|6666666.640629.peg.284</a>	yes
A and B	Clustering-based subsystems	Probably GTP or GMP signaling related	CBSS-176299.4.peg.1292	Guanosine-3&#39;,5&#39;-bis(diphosphate) 3&#39;-pyrophosphohydrolase (EC 3.1.7.2)	<a href=&#39;?page=Annotation&feature=fig|59843.19.peg.3480&#39; target=_blank>fig|59843.19.peg.3480</a>	yes	<a href=&#39;?page=Annotation&feature=fig|6666666.640629.peg.209&#39; target=_blank>fig|6666666.640629.peg.209</a>, <a href=&#39;?page=Annotation&feature=fig|6666666.640629.peg.3950&#39; target=_blank>fig|6666666.640629.peg.3950</a>	yes
A and B	Clustering-based subsystems	Probably GTP or GMP signaling related	CBSS-176299.4.peg.1292	Ribonuclease III (EC 3.1.26.3)	<a href=&#39;?page=Annotation&feature=fig|59843.19.peg.5505&#39; target=_blank>fig|59843.19.peg.5505</a>	yes	<a href=&#39;?page=Annotation&feature=fig|6666666.640629.peg.3387&#39; target=_blank>fig|6666666.640629.peg.3387</a>	yes
A and B	Clustering-based subsystems	Probably GTP or GMP signaling related	CBSS-176299.4.peg.1292	Signal peptidase I (EC 3.4.21.89)	<a href=&#39;?page=Annotation&feature=fig|59843.19.peg.2826&#39; target=_blank>fig|59843.19.peg.2826</a>, <a href=&#39;?page=Annotation&feature=fig|59843.19.peg.5486&#39; target=_blank>fig|59843.19.peg.5486</a>	yes	<a href=&#39;?page=Annotation&feature=fig|6666666.640629.peg.1428&#39; target=_blank>fig|6666666.640629.peg.1428</a>, <a href=&#39;?page=Annotation&feature=fig|6666666.640629.peg.2204&#39; target=_blank>fig|6666666.640629.peg.2204</a>, <a href=&#39;?page=Annotation&feature=fig|6666666.640629.peg.3400&#39; target=_blank>fig|6666666.640629.peg.3400</a>	yes
B	Clustering-based subsystems	Probably GTP or GMP signaling related	CBSS-176299.4.peg.1292	Signal peptidase SipW (EC 3.4.21.89), required for TasA secretion	<input type=&#39;button&#39; value=&#39;find&#39; onclick=&#39;window.open("?page=SearchGene&fr=Signal peptidase SipW (EC 3.4.21.89), required for TasA secretion&organism=59843.19&subsystem=CBSS-176299.4.peg.1292&template_gene=fig|6666666.640629.peg.1003");&#39;>	no	<a href=&#39;?page=Annotation&feature=fig|6666666.640629.peg.1003&#39; target=_blank>fig|6666666.640629.peg.1003</a>	yes
A and B	Clustering-based subsystems	Probably organic hydroperoxide resistance related hypothetical protein	CBSS-269482.1.peg.1294	Homoserine kinase (EC 2.7.1.39)	<a href=&#39;?page=Annotation&feature=fig|59843.19.peg.2342&#39; target=_blank>fig|59843.19.peg.2342</a>, <a href=&#39;?page=Annotation&feature=fig|59843.19.peg.3458&#39; target=_blank>fig|59843.19.peg.3458</a>, <a href=&#39;?page=Annotation&feature=fig|59843.19.peg.4190&#39; target=_blank>fig|59843.19.peg.4190</a>, <a href=&#39;?page=Annotation&feature=fig|59843.19.peg.4654&#39; target=_blank>fi…	yes	<a href=&#39;?page=Annotation&feature=fig|6666666.640629.peg.3117&#39; target=_blank>fig|6666666.640629.peg.3117</a>	yes
A and B	Clustering-based subsystems	Probably organic hydroperoxide resistance related hypothetical protein	CBSS-269482.1.peg.1294	Organic hydroperoxide resistance protein	<a href=&#39;?page=Annotation&feature=fig|59843.19.peg.835&#39; target=_blank>fig|59843.19.peg.835</a>	yes	<a href=&#39;?page=Annotation&feature=fig|6666666.640629.peg.3741&#39; target=_blank>fig|6666666.640629.peg.3741</a>	yes
B	Clustering-based subsystems	Recombination related cluster	CBSS-198094.1.peg.4426	DNA polymerase X family	<input type=&#39;button&#39; value=&#39;find&#39; onclick=&#39;window.open("?page=SearchGene&fr=DNA polymerase X family&organism=59843.19&subsystem=CBSS-198094.1.peg.4426&template_gene=fig|6666666.640629.peg.120");&#39;>	no	<a href=&#39;?page=Annotation&feature=fig|6666666.640629.peg.120&#39; target=_blank>fig|6666666.640629.peg.120</a>	yes
B	Clustering-based subsystems	Recombination related cluster	CBSS-198094.1.peg.4426	Possible colicin V production protein	<input type=&#39;button&#39; value=&#39;find&#39; onclick=&#39;window.open("?page=SearchGene&fr=Possible colicin V production protein&organism=59843.19&subsystem=CBSS-198094.1.peg.4426&template_gene=fig|6666666.640629.peg.118");&#39;>	no	<a href=&#39;?page=Annotation&feature=fig|6666666.640629.peg.118&#39; target=_blank>fig|6666666.640629.peg.118</a>	yes
B	Clustering-based subsystems	Recombination related cluster	CBSS-198094.1.peg.4426	Ribonuclease HIII (EC 3.1.26.4)	<input type=&#39;button&#39; value=&#39;find&#39; onclick=&#39;window.open("?page=SearchGene&fr=Ribonuclease HIII (EC 3.1.26.4)&organism=59843.19&subsystem=CBSS-198094.1.peg.4426&template_gene=fig|6666666.640629.peg.116");&#39;>	no	<a href=&#39;?page=Annotation&feature=fig|6666666.640629.peg.116&#39; target=_blank>fig|6666666.640629.peg.116</a>	yes
A and B	Clustering-based subsystems	Sulfatases and sulfatase modifying factor 1 (and a hypothetical)	Sulfatases and sulfatase modifying factor 1	Sulfatase modifying factor 1 precursor (C-alpha-formyglycine- generating enzyme 1)	<a href=&#39;?page=Annotation&feature=fig|59843.19.peg.2735&#39; target=_blank>fig|59843.19.peg.2735</a>, <a href=&#39;?page=Annotation&feature=fig|59843.19.peg.4261&#39; target=_blank>fig|59843.19.peg.4261</a>	yes	<a href=&#39;?page=Annotation&feature=fig|6666666.640629.peg.1136&#39; target=_blank>fig|6666666.640629.peg.1136</a>	yes
A	Clustering-based subsystems	Sulfatases and sulfatase modifying factor 1 (and a hypothetical)	Sulfatases and sulfatase modifying factor 1	Sulfatase	<a href=&#39;?page=Annotation&feature=fig|59843.19.peg.2738&#39; target=_blank>fig|59843.19.peg.2738</a>, <a href=&#39;?page=Annotation&feature=fig|59843.19.peg.4260&#39; target=_blank>fig|59843.19.peg.4260</a>	yes	<input type=&#39;button&#39; class=&#39;button&#39; value=&#39;find&#39; onclick=&#39;window.open("?page=SearchGene&fr=Sulfatase&organism=6666666.640629&subsystem=Sulfatases_and_sulfatase_modifying_factor_1&template_gene=fig|59843.19.peg.2738");&#39;>	no
A and B	Clustering-based subsystems	no subcategory	A DNA integrity scanning protein that co-occurs with RadA	DNA integrity scanning protein DisA	<a href=&#39;?page=Annotation&feature=fig|59843.19.peg.1418&#39; target=_blank>fig|59843.19.peg.1418</a>	yes	<a href=&#39;?page=Annotation&feature=fig|6666666.640629.peg.4168&#39; target=_blank>fig|6666666.640629.peg.4168</a>	yes
A and B	Clustering-based subsystems	no subcategory	A DNA integrity scanning protein that co-occurs with RadA	DNA repair protein RadA	<a href=&#39;?page=Annotation&feature=fig|59843.19.peg.1419&#39; target=_blank>fig|59843.19.peg.1419</a>	yes	<a href=&#39;?page=Annotation&feature=fig|6666666.640629.peg.4169&#39; target=_blank>fig|6666666.640629.peg.4169</a>	yes
A and B	Clustering-based subsystems	no subcategory	CBSS-1352.1.peg.856	Transcriptional regulator, PadR family	<a href=&#39;?page=Annotation&feature=fig|59843.19.peg.270&#39; target=_blank>fig|59843.19.peg.270</a>, <a href=&#39;?page=Annotation&feature=fig|59843.19.peg.607&#39; target=_blank>fig|59843.19.peg.607</a>, <a href=&#39;?page=Annotation&feature=fig|59843.19.peg.2401&#39; target=_blank>fig|59843.19.peg.2401</a>, <a href=&#39;?page=Annotation&feature=fig|59843.19.peg.2566&#39; target=_blank>fig|59…	yes	<a href=&#39;?page=Annotation&feature=fig|6666666.640629.peg.543&#39; target=_blank>fig|6666666.640629.peg.543</a>, <a href=&#39;?page=Annotation&feature=fig|6666666.640629.peg.571&#39; target=_blank>fig|6666666.640629.peg.571</a>, <a href=&#39;?page=Annotation&feature=fig|6666666.640629.peg.1204&#39; target=_blank>fig|6666666.640629.peg.1204</a>, <a href=&#39;?page=Annotation&feature=fig|6666666…	yes
A and B	Clustering-based subsystems	no subcategory	CBSS-138119.3.peg.2719	Ribosome-binding factor A	<a href=&#39;?page=Annotation&feature=fig|59843.19.peg.5414&#39; target=_blank>fig|59843.19.peg.5414</a>	yes	<a href=&#39;?page=Annotation&feature=fig|6666666.640629.peg.3469&#39; target=_blank>fig|6666666.640629.peg.3469</a>	yes
A and B	Clustering-based subsystems	no subcategory	CBSS-138119.3.peg.2719	Translation initiation factor 2	<a href=&#39;?page=Annotation&feature=fig|59843.19.peg.5415&#39; target=_blank>fig|59843.19.peg.5415</a>	yes	<a href=&#39;?page=Annotation&feature=fig|6666666.640629.peg.3467&#39; target=_blank>fig|6666666.640629.peg.3467</a>	yes
A and B	Clustering-based subsystems	no subcategory	CBSS-176279.3.peg.868	GTP-binding protein Obg	<a href=&#39;?page=Annotation&feature=fig|59843.19.peg.3448&#39; target=_blank>fig|59843.19.peg.3448</a>	yes	<a href=&#39;?page=Annotation&feature=fig|6666666.640629.peg.185&#39; target=_blank>fig|6666666.640629.peg.185</a>	yes
A and B	Clustering-based subsystems	no subcategory	CBSS-176279.3.peg.868	LSU ribosomal protein L21p	<a href=&#39;?page=Annotation&feature=fig|59843.19.peg.3444&#39; target=_blank>fig|59843.19.peg.3444</a>	yes	<a href=&#39;?page=Annotation&feature=fig|6666666.640629.peg.181&#39; target=_blank>fig|6666666.640629.peg.181</a>	yes
A and B	Clustering-based subsystems	no subcategory	CBSS-176279.3.peg.868	LSU ribosomal protein L27p	<a href=&#39;?page=Annotation&feature=fig|59843.19.peg.3446&#39; target=_blank>fig|59843.19.peg.3446</a>	yes	<a href=&#39;?page=Annotation&feature=fig|6666666.640629.peg.183&#39; target=_blank>fig|6666666.640629.peg.183</a>	yes
A and B	Clustering-based subsystems	no subcategory	CBSS-176299.4.peg.1996A	Bis(5&#39;-nucleosyl)-tetraphosphatase (asymmetrical) (EC 3.6.1.17)	<a href=&#39;?page=Annotation&feature=fig|59843.19.peg.3661&#39; target=_blank>fig|59843.19.peg.3661</a>	yes	<a href=&#39;?page=Annotation&feature=fig|6666666.640629.peg.1491&#39; target=_blank>fig|6666666.640629.peg.1491</a>	yes
A and B	Clustering-based subsystems	no subcategory	CBSS-176299.4.peg.1996A	Glycerophosphoryl diester phosphodiesterase (EC 3.1.4.46)	<a href=&#39;?page=Annotation&feature=fig|59843.19.peg.259&#39; target=_blank>fig|59843.19.peg.259</a>, <a href=&#39;?page=Annotation&feature=fig|59843.19.peg.1836&#39; target=_blank>fig|59843.19.peg.1836</a>, <a href=&#39;?page=Annotation&feature=fig|59843.19.peg.2496&#39; target=_blank>fig|59843.19.peg.2496</a>, <a href=&#39;?page=Annotation&feature=fig|59843.19.peg.2768&#39; target=_blank>fig|…	yes	<a href=&#39;?page=Annotation&feature=fig|6666666.640629.peg.415&#39; target=_blank>fig|6666666.640629.peg.415</a>, <a href=&#39;?page=Annotation&feature=fig|6666666.640629.peg.3562&#39; target=_blank>fig|6666666.640629.peg.3562</a>	yes
A and B	Clustering-based subsystems	no subcategory	CBSS-188.1.peg.6720	Serine protein kinase (prkA protein), P-loop containing	<a href=&#39;?page=Annotation&feature=fig|59843.19.peg.638&#39; target=_blank>fig|59843.19.peg.638</a>	yes	<a href=&#39;?page=Annotation&feature=fig|6666666.640629.peg.1289&#39; target=_blank>fig|6666666.640629.peg.1289</a>	yes
A and B	Clustering-based subsystems	no subcategory	CBSS-188.1.peg.6720	UPF0229 protein YeaH	<a href=&#39;?page=Annotation&feature=fig|59843.19.peg.553&#39; target=_blank>fig|59843.19.peg.553</a>	yes	<a href=&#39;?page=Annotation&feature=fig|6666666.640629.peg.1293&#39; target=_blank>fig|6666666.640629.peg.1293</a>	yes
A and B	Clustering-based subsystems	no subcategory	CBSS-266117.6.peg.1260	16S rRNA (guanine(966)-N(2))-methyltransferase (EC 2.1.1.171)	<a href=&#39;?page=Annotation&feature=fig|59843.19.peg.5519&#39; target=_blank>fig|59843.19.peg.5519</a>	yes	<a href=&#39;?page=Annotation&feature=fig|6666666.640629.peg.2296&#39; target=_blank>fig|6666666.640629.peg.2296</a>	yes
A and B	Clustering-based subsystems	no subcategory	CBSS-266117.6.peg.1260	Phosphopantetheine adenylyltransferase (EC 2.7.7.3)	<a href=&#39;?page=Annotation&feature=fig|59843.19.peg.5518&#39; target=_blank>fig|59843.19.peg.5518</a>	yes	<a href=&#39;?page=Annotation&feature=fig|6666666.640629.peg.2297&#39; target=_blank>fig|6666666.640629.peg.2297</a>	yes
A and B	Clustering-based subsystems	no subcategory	CBSS-269801.1.peg.1715	16S rRNA (guanine(966)-N(2))-methyltransferase (EC 2.1.1.171)	<a href=&#39;?page=Annotation&feature=fig|59843.19.peg.5519&#39; target=_blank>fig|59843.19.peg.5519</a>	yes	<a href=&#39;?page=Annotation&feature=fig|6666666.640629.peg.2296&#39; target=_blank>fig|6666666.640629.peg.2296</a>	yes
A and B	Clustering-based subsystems	no subcategory	CBSS-269801.1.peg.1715	Lon-like protease with PDZ domain	<a href=&#39;?page=Annotation&feature=fig|59843.19.peg.5516&#39; target=_blank>fig|59843.19.peg.5516</a>	yes	<a href=&#39;?page=Annotation&feature=fig|6666666.640629.peg.2300&#39; target=_blank>fig|6666666.640629.peg.2300</a>	yes
A and B	Clustering-based subsystems	no subcategory	CBSS-269801.1.peg.1715	Phosphopantetheine adenylyltransferase (EC 2.7.7.3)	<a href=&#39;?page=Annotation&feature=fig|59843.19.peg.5518&#39; target=_blank>fig|59843.19.peg.5518</a>	yes	<a href=&#39;?page=Annotation&feature=fig|6666666.640629.peg.2297&#39; target=_blank>fig|6666666.640629.peg.2297</a>	yes
A and B	Clustering-based subsystems	no subcategory	CBSS-272943.3.peg.1367	DNA topoisomerase I (EC 5.99.1.2)	<a href=&#39;?page=Annotation&feature=fig|59843.19.peg.1001&#39; target=_blank>fig|59843.19.peg.1001</a>, <a href=&#39;?page=Annotation&feature=fig|59843.19.peg.5470&#39; target=_blank>fig|59843.19.peg.5470</a>	yes	<a href=&#39;?page=Annotation&feature=fig|6666666.640629.peg.3409&#39; target=_blank>fig|6666666.640629.peg.3409</a>	yes
A and B	Clustering-based subsystems	no subcategory	CBSS-272943.3.peg.1367	Rossmann fold nucleotide-binding protein Smf possibly involved in DNA uptake	<a href=&#39;?page=Annotation&feature=fig|59843.19.peg.5471&#39; target=_blank>fig|59843.19.peg.5471</a>	yes	<a href=&#39;?page=Annotation&feature=fig|6666666.640629.peg.3408&#39; target=_blank>fig|6666666.640629.peg.3408</a>	yes
A and B	Clustering-based subsystems	no subcategory	CBSS-312309.3.peg.1965	Methionine aminopeptidase (EC 3.4.11.18)	<a href=&#39;?page=Annotation&feature=fig|59843.19.peg.1248&#39; target=_blank>fig|59843.19.peg.1248</a>, <a href=&#39;?page=Annotation&feature=fig|59843.19.peg.1365&#39; target=_blank>fig|59843.19.peg.1365</a>, <a href=&#39;?page=Annotation&feature=fig|59843.19.peg.2721&#39; target=_blank>fig|59843.19.peg.2721</a>, <a href=&#39;?page=Annotation&feature=fig|59843.19.peg.2852&#39; target=_blank>fi…	yes	<a href=&#39;?page=Annotation&feature=fig|6666666.640629.peg.1348&#39; target=_blank>fig|6666666.640629.peg.1348</a>, <a href=&#39;?page=Annotation&feature=fig|6666666.640629.peg.4120&#39; target=_blank>fig|6666666.640629.peg.4120</a>	yes
A and B	Clustering-based subsystems	no subcategory	CBSS-312309.3.peg.1965	SSU ribosomal protein S2p (SAe)	<a href=&#39;?page=Annotation&feature=fig|59843.19.peg.5429&#39; target=_blank>fig|59843.19.peg.5429</a>	yes	<a href=&#39;?page=Annotation&feature=fig|6666666.640629.peg.3450&#39; target=_blank>fig|6666666.640629.peg.3450</a>	yes
A and B	Clustering-based subsystems	no subcategory	CBSS-312309.3.peg.1965	Translation elongation factor Ts	<a href=&#39;?page=Annotation&feature=fig|59843.19.peg.5428&#39; target=_blank>fig|59843.19.peg.5428</a>	yes	<a href=&#39;?page=Annotation&feature=fig|6666666.640629.peg.3452&#39; target=_blank>fig|6666666.640629.peg.3452</a>	yes
A and B	Clustering-based subsystems	no subcategory	CBSS-315749.4.peg.3658	Glycine cleavage system H protein	<a href=&#39;?page=Annotation&feature=fig|59843.19.peg.4806&#39; target=_blank>fig|59843.19.peg.4806</a>	yes	<a href=&#39;?page=Annotation&feature=fig|6666666.640629.peg.759&#39; target=_blank>fig|6666666.640629.peg.759</a>	yes
A and B	Clustering-based subsystems	no subcategory	CBSS-315749.4.peg.3658	Thioredoxin	<a href=&#39;?page=Annotation&feature=fig|59843.19.peg.218&#39; target=_blank>fig|59843.19.peg.218</a>, <a href=&#39;?page=Annotation&feature=fig|59843.19.peg.1049&#39; target=_blank>fig|59843.19.peg.1049</a>, <a href=&#39;?page=Annotation&feature=fig|59843.19.peg.3227&#39; target=_blank>fig|59843.19.peg.3227</a>, <a href=&#39;?page=Annotation&feature=fig|59843.19.peg.4315&#39; target=_blank>fig|…	yes	<a href=&#39;?page=Annotation&feature=fig|6666666.640629.peg.128&#39; target=_blank>fig|6666666.640629.peg.128</a>, <a href=&#39;?page=Annotation&feature=fig|6666666.640629.peg.757&#39; target=_blank>fig|6666666.640629.peg.757</a>, <a href=&#39;?page=Annotation&feature=fig|6666666.640629.peg.1235&#39; target=_blank>fig|6666666.640629.peg.1235</a>, <a href=&#39;?page=Annotation&feature=fig|6666666…	yes
A and B	Clustering-based subsystems	no subcategory	CBSS-315749.4.peg.3658	Toprim domain protein	<a href=&#39;?page=Annotation&feature=fig|59843.19.peg.1087&#39; target=_blank>fig|59843.19.peg.1087</a>	yes	<a href=&#39;?page=Annotation&feature=fig|6666666.640629.peg.758&#39; target=_blank>fig|6666666.640629.peg.758</a>	yes
A and B	Clustering-based subsystems	no subcategory	CBSS-316057.3.peg.563	Cytochrome c oxidase polypeptide II (EC 1.9.3.1)	<a href=&#39;?page=Annotation&feature=fig|59843.19.peg.2722&#39; target=_blank>fig|59843.19.peg.2722</a>	yes	<a href=&#39;?page=Annotation&feature=fig|6666666.640629.peg.1778&#39; target=_blank>fig|6666666.640629.peg.1778</a>, <a href=&#39;?page=Annotation&feature=fig|6666666.640629.peg.2277&#39; target=_blank>fig|6666666.640629.peg.2277</a>	yes
A and B	Clustering-based subsystems	no subcategory	CBSS-316057.3.peg.563	Cytochrome c oxidase polypeptide III (EC 1.9.3.1)	<a href=&#39;?page=Annotation&feature=fig|59843.19.peg.2724&#39; target=_blank>fig|59843.19.peg.2724</a>	yes	<a href=&#39;?page=Annotation&feature=fig|6666666.640629.peg.2279&#39; target=_blank>fig|6666666.640629.peg.2279</a>	yes
A and B	Clustering-based subsystems	no subcategory	CBSS-393131.3.peg.612	Putative metallopeptidase (Zinc) SprT family	<a href=&#39;?page=Annotation&feature=fig|59843.19.peg.845&#39; target=_blank>fig|59843.19.peg.845</a>	yes	<a href=&#39;?page=Annotation&feature=fig|6666666.640629.peg.3679&#39; target=_blank>fig|6666666.640629.peg.3679</a>	yes
A and B	Clustering-based subsystems	no subcategory	CBSS-393131.3.peg.612	Transcription accessory protein (S1 RNA-binding domain)	<a href=&#39;?page=Annotation&feature=fig|59843.19.peg.851&#39; target=_blank>fig|59843.19.peg.851</a>	yes	<a href=&#39;?page=Annotation&feature=fig|6666666.640629.peg.3681&#39; target=_blank>fig|6666666.640629.peg.3681</a>	yes
A and B	Clustering-based subsystems	no subcategory	CBSS-393133.3.peg.2787	Thymidylate kinase (EC 2.7.4.9)	<a href=&#39;?page=Annotation&feature=fig|59843.19.peg.1997&#39; target=_blank>fig|59843.19.peg.1997</a>	yes	<a href=&#39;?page=Annotation&feature=fig|6666666.640629.peg.4304&#39; target=_blank>fig|6666666.640629.peg.4304</a>	yes
A and B	Clustering-based subsystems	no subcategory	CBSS-393133.3.peg.2787	protein from nitrogen regulatory protein P-II (GLNB) family, ortholog YAAQ B. subtilis	<a href=&#39;?page=Annotation&feature=fig|59843.19.peg.1998&#39; target=_blank>fig|59843.19.peg.1998</a>	yes	<a href=&#39;?page=Annotation&feature=fig|6666666.640629.peg.4303&#39; target=_blank>fig|6666666.640629.peg.4303</a>	yes
A and B	Clustering-based subsystems	no subcategory	CBSS-56780.10.peg.1536	Metal-dependent hydrolase YbeY, involved in rRNA and/or ribosome maturation and assembly	<a href=&#39;?page=Annotation&feature=fig|59843.19.peg.3671&#39; target=_blank>fig|59843.19.peg.3671</a>	yes	<a href=&#39;?page=Annotation&feature=fig|6666666.640629.peg.282&#39; target=_blank>fig|6666666.640629.peg.282</a>	yes
A and B	Clustering-based subsystems	no subcategory	CBSS-56780.10.peg.1536	Phosphate starvation-inducible protein PhoH, predicted ATPase	<a href=&#39;?page=Annotation&feature=fig|59843.19.peg.3669&#39; target=_blank>fig|59843.19.peg.3669</a>, <a href=&#39;?page=Annotation&feature=fig|59843.19.peg.3669&#39; target=_blank>fig|59843.19.peg.3669</a>	yes	<a href=&#39;?page=Annotation&feature=fig|6666666.640629.peg.281&#39; target=_blank>fig|6666666.640629.peg.281</a>, <a href=&#39;?page=Annotation&feature=fig|6666666.640629.peg.281&#39; target=_blank>fig|6666666.640629.peg.281</a>	yes
A and B	Clustering-based subsystems	no subcategory	DNA gyrase subunits	DNA gyrase subunit A (EC 5.99.1.3)	<a href=&#39;?page=Annotation&feature=fig|59843.19.peg.1990&#39; target=_blank>fig|59843.19.peg.1990</a>	yes	<a href=&#39;?page=Annotation&feature=fig|6666666.640629.peg.2932&#39; target=_blank>fig|6666666.640629.peg.2932</a>	yes
A and B	Clustering-based subsystems	no subcategory	DNA gyrase subunits	DNA gyrase subunit B (EC 5.99.1.3)	<a href=&#39;?page=Annotation&feature=fig|59843.19.peg.1988&#39; target=_blank>fig|59843.19.peg.1988</a>, <a href=&#39;?page=Annotation&feature=fig|59843.19.peg.2224&#39; target=_blank>fig|59843.19.peg.2224</a>	yes	<a href=&#39;?page=Annotation&feature=fig|6666666.640629.peg.2931&#39; target=_blank>fig|6666666.640629.peg.2931</a>	yes
A and B	Clustering-based subsystems	no subcategory	DNA replication cluster 1	Chromosomal replication initiator protein DnaA	<a href=&#39;?page=Annotation&feature=fig|59843.19.peg.1983&#39; target=_blank>fig|59843.19.peg.1983</a>	yes	<a href=&#39;?page=Annotation&feature=fig|6666666.640629.peg.2926&#39; target=_blank>fig|6666666.640629.peg.2926</a>	yes
A and B	Clustering-based subsystems	no subcategory	DNA replication cluster 1	DNA gyrase subunit A (EC 5.99.1.3)	<a href=&#39;?page=Annotation&feature=fig|59843.19.peg.1990&#39; target=_blank>fig|59843.19.peg.1990</a>	yes	<a href=&#39;?page=Annotation&feature=fig|6666666.640629.peg.2932&#39; target=_blank>fig|6666666.640629.peg.2932</a>	yes
A and B	Clustering-based subsystems	no subcategory	DNA replication cluster 1	DNA gyrase subunit B (EC 5.99.1.3)	<a href=&#39;?page=Annotation&feature=fig|59843.19.peg.1988&#39; target=_blank>fig|59843.19.peg.1988</a>, <a href=&#39;?page=Annotation&feature=fig|59843.19.peg.2224&#39; target=_blank>fig|59843.19.peg.2224</a>	yes	<a href=&#39;?page=Annotation&feature=fig|6666666.640629.peg.2931&#39; target=_blank>fig|6666666.640629.peg.2931</a>	yes
A and B	Clustering-based subsystems	no subcategory	DNA replication cluster 1	DNA polymerase III beta subunit (EC 2.7.7.7)	<a href=&#39;?page=Annotation&feature=fig|59843.19.peg.1984&#39; target=_blank>fig|59843.19.peg.1984</a>	yes	<a href=&#39;?page=Annotation&feature=fig|6666666.640629.peg.2927&#39; target=_blank>fig|6666666.640629.peg.2927</a>	yes
A and B	Clustering-based subsystems	no subcategory	DNA replication cluster 1	DNA recombination and repair protein RecF	<a href=&#39;?page=Annotation&feature=fig|59843.19.peg.1986&#39; target=_blank>fig|59843.19.peg.1986</a>	yes	<a href=&#39;?page=Annotation&feature=fig|6666666.640629.peg.2929&#39; target=_blank>fig|6666666.640629.peg.2929</a>	yes
A and B	Clustering-based subsystems	no subcategory	DNA replication cluster 1	OrfX	<a href=&#39;?page=Annotation&feature=fig|59843.19.peg.4216&#39; target=_blank>fig|59843.19.peg.4216</a>	yes	<a href=&#39;?page=Annotation&feature=fig|6666666.640629.peg.2930&#39; target=_blank>fig|6666666.640629.peg.2930</a>	yes
A and B	Clustering-based subsystems	no subcategory	DNA replication cluster 1	Ribosome-associated heat shock protein implicated in the recycling of the 50S subunit (S4 paralog)	<a href=&#39;?page=Annotation&feature=fig|59843.19.peg.2030&#39; target=_blank>fig|59843.19.peg.2030</a>	yes	<a href=&#39;?page=Annotation&feature=fig|6666666.640629.peg.4272&#39; target=_blank>fig|6666666.640629.peg.4272</a>	yes
A and B	Clustering-based subsystems	no subcategory	EC699-706	Allophanate hydrolase 2 subunit 1 (EC 3.5.1.54)	<a href=&#39;?page=Annotation&feature=fig|59843.19.peg.5051&#39; target=_blank>fig|59843.19.peg.5051</a>	yes	<a href=&#39;?page=Annotation&feature=fig|6666666.640629.peg.3220&#39; target=_blank>fig|6666666.640629.peg.3220</a>	yes
A and B	Clustering-based subsystems	no subcategory	EC699-706	Allophanate hydrolase 2 subunit 2 (EC 3.5.1.54)	<a href=&#39;?page=Annotation&feature=fig|59843.19.peg.5050&#39; target=_blank>fig|59843.19.peg.5050</a>	yes	<a href=&#39;?page=Annotation&feature=fig|6666666.640629.peg.3219&#39; target=_blank>fig|6666666.640629.peg.3219</a>	yes
A and B	Clustering-based subsystems	no subcategory	EC699-706	Lactam utilization protein LamB	<a href=&#39;?page=Annotation&feature=fig|59843.19.peg.5049&#39; target=_blank>fig|59843.19.peg.5049</a>	yes	<a href=&#39;?page=Annotation&feature=fig|6666666.640629.peg.3218&#39; target=_blank>fig|6666666.640629.peg.3218</a>	yes
A and B	Clustering-based subsystems	no subcategory	Glycyl-tRNA synthetase containing cluster	DNA recombination and repair protein RecO	<a href=&#39;?page=Annotation&feature=fig|59843.19.peg.3676&#39; target=_blank>fig|59843.19.peg.3676</a>	yes	<a href=&#39;?page=Annotation&feature=fig|6666666.640629.peg.286&#39; target=_blank>fig|6666666.640629.peg.286</a>	yes
A and B	Clustering-based subsystems	no subcategory	Glycyl-tRNA synthetase containing cluster	GTP-binding protein Era	<a href=&#39;?page=Annotation&feature=fig|59843.19.peg.3674&#39; target=_blank>fig|59843.19.peg.3674</a>	yes	<a href=&#39;?page=Annotation&feature=fig|6666666.640629.peg.284&#39; target=_blank>fig|6666666.640629.peg.284</a>	yes
A and B	Clustering-based subsystems	no subcategory	Glycyl-tRNA synthetase containing cluster	Glycyl-tRNA synthetase alpha chain (EC 6.1.1.14)	<a href=&#39;?page=Annotation&feature=fig|59843.19.peg.3677&#39; target=_blank>fig|59843.19.peg.3677</a>	yes	<a href=&#39;?page=Annotation&feature=fig|6666666.640629.peg.287&#39; target=_blank>fig|6666666.640629.peg.287</a>	yes
A and B	Clustering-based subsystems	no subcategory	Glycyl-tRNA synthetase containing cluster	Glycyl-tRNA synthetase beta chain (EC 6.1.1.14)	<a href=&#39;?page=Annotation&feature=fig|59843.19.peg.3678&#39; target=_blank>fig|59843.19.peg.3678</a>	yes	<a href=&#39;?page=Annotation&feature=fig|6666666.640629.peg.288&#39; target=_blank>fig|6666666.640629.peg.288</a>	yes
A and B	Clustering-based subsystems	no subcategory	Glycyl-tRNA synthetase containing cluster	Metal-dependent hydrolase YbeY, involved in rRNA and/or ribosome maturation and assembly	<a href=&#39;?page=Annotation&feature=fig|59843.19.peg.3671&#39; target=_blank>fig|59843.19.peg.3671</a>	yes	<a href=&#39;?page=Annotation&feature=fig|6666666.640629.peg.282&#39; target=_blank>fig|6666666.640629.peg.282</a>	yes
A and B	Clustering-based subsystems	no subcategory	Glycyl-tRNA synthetase containing cluster	Phosphate starvation-inducible protein PhoH, predicted ATPase	<a href=&#39;?page=Annotation&feature=fig|59843.19.peg.3669&#39; target=_blank>fig|59843.19.peg.3669</a>	yes	<a href=&#39;?page=Annotation&feature=fig|6666666.640629.peg.281&#39; target=_blank>fig|6666666.640629.peg.281</a>	yes
A and B	Clustering-based subsystems	no subcategory	KH domain RNA binding protein YlqC	16S rRNA processing protein RimM	<a href=&#39;?page=Annotation&feature=fig|59843.19.peg.5491&#39; target=_blank>fig|59843.19.peg.5491</a>	yes	<a href=&#39;?page=Annotation&feature=fig|6666666.640629.peg.3397&#39; target=_blank>fig|6666666.640629.peg.3397</a>	yes
A and B	Clustering-based subsystems	no subcategory	KH domain RNA binding protein YlqC	KH domain RNA binding protein YlqC	<a href=&#39;?page=Annotation&feature=fig|59843.19.peg.5492&#39; target=_blank>fig|59843.19.peg.5492</a>	yes	<a href=&#39;?page=Annotation&feature=fig|6666666.640629.peg.3395&#39; target=_blank>fig|6666666.640629.peg.3395</a>	yes
A and B	Clustering-based subsystems	no subcategory	KH domain RNA binding protein YlqC	SSU ribosomal protein S16p	<a href=&#39;?page=Annotation&feature=fig|59843.19.peg.5493&#39; target=_blank>fig|59843.19.peg.5493</a>	yes	<a href=&#39;?page=Annotation&feature=fig|6666666.640629.peg.3394&#39; target=_blank>fig|6666666.640629.peg.3394</a>	yes
A and B	Clustering-based subsystems	no subcategory	LMPTP YfkJ cluster	Low molecular weight protein tyrosine phosphatase (EC 3.1.3.48)	<a href=&#39;?page=Annotation&feature=fig|59843.19.peg.1576&#39; target=_blank>fig|59843.19.peg.1576</a>, <a href=&#39;?page=Annotation&feature=fig|59843.19.peg.4337&#39; target=_blank>fig|59843.19.peg.4337</a>	yes	<a href=&#39;?page=Annotation&feature=fig|6666666.640629.peg.3018&#39; target=_blank>fig|6666666.640629.peg.3018</a>, <a href=&#39;?page=Annotation&feature=fig|6666666.640629.peg.3238&#39; target=_blank>fig|6666666.640629.peg.3238</a>	yes
A and B	Clustering-based subsystems	no subcategory	NusA-TFII Cluster	COG2740: Predicted nucleic-acid-binding protein implicated in transcription termination	<a href=&#39;?page=Annotation&feature=fig|59843.19.peg.5417&#39; target=_blank>fig|59843.19.peg.5417</a>	yes	<a href=&#39;?page=Annotation&feature=fig|6666666.640629.peg.3465&#39; target=_blank>fig|6666666.640629.peg.3465</a>	yes
A and B	Clustering-based subsystems	no subcategory	NusA-TFII Cluster	Ribosome-binding factor A	<a href=&#39;?page=Annotation&feature=fig|59843.19.peg.5414&#39; target=_blank>fig|59843.19.peg.5414</a>	yes	<a href=&#39;?page=Annotation&feature=fig|6666666.640629.peg.3469&#39; target=_blank>fig|6666666.640629.peg.3469</a>	yes
A and B	Clustering-based subsystems	no subcategory	NusA-TFII Cluster	Transcription termination protein NusA	<a href=&#39;?page=Annotation&feature=fig|59843.19.peg.5418&#39; target=_blank>fig|59843.19.peg.5418</a>	yes	<a href=&#39;?page=Annotation&feature=fig|6666666.640629.peg.3464&#39; target=_blank>fig|6666666.640629.peg.3464</a>	yes
A and B	Clustering-based subsystems	no subcategory	NusA-TFII Cluster	Translation initiation factor 2	<a href=&#39;?page=Annotation&feature=fig|59843.19.peg.5415&#39; target=_blank>fig|59843.19.peg.5415</a>	yes	<a href=&#39;?page=Annotation&feature=fig|6666666.640629.peg.3467&#39; target=_blank>fig|6666666.640629.peg.3467</a>	yes
A and B	Clustering-based subsystems	no subcategory	Purine salvage cluster	Exodeoxyribonuclease VII large subunit (EC 3.1.11.6)	<a href=&#39;?page=Annotation&feature=fig|59843.19.peg.4038&#39; target=_blank>fig|59843.19.peg.4038</a>	yes	<a href=&#39;?page=Annotation&feature=fig|6666666.640629.peg.374&#39; target=_blank>fig|6666666.640629.peg.374</a>	yes
A and B	Clustering-based subsystems	no subcategory	Purine salvage cluster	Exodeoxyribonuclease VII small subunit (EC 3.1.11.6)	<a href=&#39;?page=Annotation&feature=fig|59843.19.peg.4039&#39; target=_blank>fig|59843.19.peg.4039</a>	yes	<a href=&#39;?page=Annotation&feature=fig|6666666.640629.peg.375&#39; target=_blank>fig|6666666.640629.peg.375</a>	yes
A and B	Clustering-based subsystems	no subcategory	Purine salvage cluster	GMP synthase [glutamine-hydrolyzing], ATP pyrophosphatase subunit (EC 6.3.5.2)	<a href=&#39;?page=Annotation&feature=fig|59843.19.peg.2880&#39; target=_blank>fig|59843.19.peg.2880</a>	yes	<a href=&#39;?page=Annotation&feature=fig|6666666.640629.peg.1820&#39; target=_blank>fig|6666666.640629.peg.1820</a>	yes
A and B	Clustering-based subsystems	no subcategory	Purine salvage cluster	GMP synthase [glutamine-hydrolyzing], amidotransferase subunit (EC 6.3.5.2)	<a href=&#39;?page=Annotation&feature=fig|59843.19.peg.2880&#39; target=_blank>fig|59843.19.peg.2880</a>	yes	<a href=&#39;?page=Annotation&feature=fig|6666666.640629.peg.1820&#39; target=_blank>fig|6666666.640629.peg.1820</a>	yes
A and B	Clustering-based subsystems	no subcategory	Purine salvage cluster	Inosine-5&#39;-monophosphate dehydrogenase (EC 1.1.1.205)	<a href=&#39;?page=Annotation&feature=fig|59843.19.peg.2062&#39; target=_blank>fig|59843.19.peg.2062</a>	yes	<a href=&#39;?page=Annotation&feature=fig|6666666.640629.peg.2287&#39; target=_blank>fig|6666666.640629.peg.2287</a>, <a href=&#39;?page=Annotation&feature=fig|6666666.640629.peg.2935&#39; target=_blank>fig|6666666.640629.peg.2935</a>	yes
A and B	Clustering-based subsystems	no subcategory	Ribosome recycling related cluster	Ribosome recycling factor	<a href=&#39;?page=Annotation&feature=fig|59843.19.peg.5426&#39; target=_blank>fig|59843.19.peg.5426</a>	yes	<a href=&#39;?page=Annotation&feature=fig|6666666.640629.peg.3454&#39; target=_blank>fig|6666666.640629.peg.3454</a>	yes
A and B	Clustering-based subsystems	no subcategory	Ribosome recycling related cluster	SSU ribosomal protein S2p (SAe)	<a href=&#39;?page=Annotation&feature=fig|59843.19.peg.5429&#39; target=_blank>fig|59843.19.peg.5429</a>	yes	<a href=&#39;?page=Annotation&feature=fig|6666666.640629.peg.3450&#39; target=_blank>fig|6666666.640629.peg.3450</a>	yes
A and B	Clustering-based subsystems	no subcategory	Ribosome recycling related cluster	Translation elongation factor Ts	<a href=&#39;?page=Annotation&feature=fig|59843.19.peg.5428&#39; target=_blank>fig|59843.19.peg.5428</a>	yes	<a href=&#39;?page=Annotation&feature=fig|6666666.640629.peg.3452&#39; target=_blank>fig|6666666.640629.peg.3452</a>	yes
A	Clustering-based subsystems	no subcategory	CBSS-1806.1.peg.3045	FIG007959: peptidase, M16 family	<a href=&#39;?page=Annotation&feature=fig|59843.19.peg.5407&#39; target=_blank>fig|59843.19.peg.5407</a>	yes	<input type=&#39;button&#39; class=&#39;button&#39; value=&#39;find&#39; onclick=&#39;window.open("?page=SearchGene&fr=FIG007959: peptidase, M16 family&organism=6666666.640629&subsystem=CBSS-1806.1.peg.3045&template_gene=fig|59843.19.peg.5407");&#39;>	no
A	Clustering-based subsystems	no subcategory	CBSS-228410.1.peg.134	DNA polymerase III epsilon subunit (EC 2.7.7.7)	<a href=&#39;?page=Annotation&feature=fig|59843.19.peg.231&#39; target=_blank>fig|59843.19.peg.231</a>	yes	<input type=&#39;button&#39; class=&#39;button&#39; value=&#39;find&#39; onclick=&#39;window.open("?page=SearchGene&fr=DNA polymerase III epsilon subunit (EC 2.7.7.7)&organism=6666666.640629&subsystem=CBSS-228410.1.peg.134&template_gene=fig|59843.19.peg.231");&#39;>	no
A	Clustering-based subsystems	no subcategory	CBSS-228410.1.peg.134	Hydroxyacylglutathione hydrolase (EC 3.1.2.6)	<a href=&#39;?page=Annotation&feature=fig|59843.19.peg.3052&#39; target=_blank>fig|59843.19.peg.3052</a>	yes	<input type=&#39;button&#39; class=&#39;button&#39; value=&#39;find&#39; onclick=&#39;window.open("?page=SearchGene&fr=Hydroxyacylglutathione hydrolase (EC 3.1.2.6)&organism=6666666.640629&subsystem=CBSS-228410.1.peg.134&template_gene=fig|59843.19.peg.3052");&#39;>	no
A	Clustering-based subsystems	no subcategory	CBSS-228410.1.peg.134	Membrane-bound lytic murein transglycosylase D precursor (EC 3.2.1.-)	<a href=&#39;?page=Annotation&feature=fig|59843.19.peg.3690&#39; target=_blank>fig|59843.19.peg.3690</a>	yes	<input type=&#39;button&#39; class=&#39;button&#39; value=&#39;find&#39; onclick=&#39;window.open("?page=SearchGene&fr=Membrane-bound lytic murein transglycosylase D precursor (EC 3.2.1.-)&organism=6666666.640629&subsystem=CBSS-228410.1.peg.134&template_gene=fig|59843.19.peg.3690");&#39;>	no
A	Clustering-based subsystems	no subcategory	CBSS-269801.1.peg.1715	FIGfam003972: membrane protein	<a href=&#39;?page=Annotation&feature=fig|59843.19.peg.5517&#39; target=_blank>fig|59843.19.peg.5517</a>	yes	<input type=&#39;button&#39; class=&#39;button&#39; value=&#39;find&#39; onclick=&#39;window.open("?page=SearchGene&fr=FIGfam003972: membrane protein&organism=6666666.640629&subsystem=CBSS-269801.1.peg.1715&template_gene=fig|59843.19.peg.5517");&#39;>	no
A	Clustering-based subsystems	no subcategory	CBSS-56780.10.peg.1536	Membrane protein containing HD superfamily hydrolase domain, YQFF ortholog	<a href=&#39;?page=Annotation&feature=fig|59843.19.peg.3670&#39; target=_blank>fig|59843.19.peg.3670</a>	yes	<input type=&#39;button&#39; class=&#39;button&#39; value=&#39;find&#39; onclick=&#39;window.open("?page=SearchGene&fr=Membrane protein containing HD superfamily hydrolase domain, YQFF ortholog&organism=6666666.640629&subsystem=CBSS-56780.10.peg.1536&template_gene=fig|59843.19.peg.3670");&#39;>	no
A	Clustering-based subsystems	no subcategory	LMPTP YfkJ cluster	Hypothetical protein YfkK	<a href=&#39;?page=Annotation&feature=fig|59843.19.peg.1153&#39; target=_blank>fig|59843.19.peg.1153</a>	yes	<input type=&#39;button&#39; class=&#39;button&#39; value=&#39;find&#39; onclick=&#39;window.open("?page=SearchGene&fr=Hypothetical protein YfkK&organism=6666666.640629&subsystem=LMPTP_YfkJ_cluster&template_gene=fig|59843.19.peg.1153");&#39;>	no
A	Clustering-based subsystems	no subcategory	Stationary phase repair cluster	FIG139438: lipoprotein B	<a href=&#39;?page=Annotation&feature=fig|59843.19.peg.5100&#39; target=_blank>fig|59843.19.peg.5100</a>	yes	<input type=&#39;button&#39; class=&#39;button&#39; value=&#39;find&#39; onclick=&#39;window.open("?page=SearchGene&fr=FIG139438: lipoprotein B&organism=6666666.640629&subsystem=Stationary_phase_repair_cluster&template_gene=fig|59843.19.peg.5100");&#39;>	no
B	Clustering-based subsystems	no subcategory	CBSS-101031.3.peg.1876	NifU-like domain protein	<input type=&#39;button&#39; value=&#39;find&#39; onclick=&#39;window.open("?page=SearchGene&fr=NifU-like domain protein&organism=59843.19&subsystem=CBSS-101031.3.peg.1876&template_gene=fig|6666666.640629.peg.729");&#39;>	no	<a href=&#39;?page=Annotation&feature=fig|6666666.640629.peg.729&#39; target=_blank>fig|6666666.640629.peg.729</a>	yes
B	Clustering-based subsystems	no subcategory	CBSS-101031.3.peg.1876	YuzD-like protein	<input type=&#39;button&#39; value=&#39;find&#39; onclick=&#39;window.open("?page=SearchGene&fr=YuzD-like protein&organism=59843.19&subsystem=CBSS-101031.3.peg.1876&template_gene=fig|6666666.640629.peg.728");&#39;>	no	<a href=&#39;?page=Annotation&feature=fig|6666666.640629.peg.728&#39; target=_blank>fig|6666666.640629.peg.728</a>	yes
B	Clustering-based subsystems	no subcategory	CBSS-176279.3.peg.868	FIG139598: Potential ribosomal protein	<input type=&#39;button&#39; value=&#39;find&#39; onclick=&#39;window.open("?page=SearchGene&fr=FIG139598: Potential ribosomal protein&organism=59843.19&subsystem=CBSS-176279.3.peg.868&template_gene=fig|6666666.640629.peg.182");&#39;>	no	<a href=&#39;?page=Annotation&feature=fig|6666666.640629.peg.182&#39; target=_blank>fig|6666666.640629.peg.182</a>	yes
B	Clustering-based subsystems	no subcategory	CBSS-211586.9.peg.2560	Acetate permease ActP (cation/acetate symporter)	<input type=&#39;button&#39; value=&#39;find&#39; onclick=&#39;window.open("?page=SearchGene&fr=Acetate permease ActP (cation/acetate symporter)&organism=59843.19&subsystem=CBSS-211586.9.peg.2560&template_gene=fig|6666666.640629.peg.3101");&#39;>	no	<a href=&#39;?page=Annotation&feature=fig|6666666.640629.peg.3101&#39; target=_blank>fig|6666666.640629.peg.3101</a>	yes
B	Clustering-based subsystems	no subcategory	CBSS-211586.9.peg.2560	FIG152265: Sodium:solute symporter associated protein	<input type=&#39;button&#39; value=&#39;find&#39; onclick=&#39;window.open("?page=SearchGene&fr=FIG152265: Sodium:solute symporter associated protein&organism=59843.19&subsystem=CBSS-211586.9.peg.2560&template_gene=fig|6666666.640629.peg.3100");&#39;>	no	<a href=&#39;?page=Annotation&feature=fig|6666666.640629.peg.3100&#39; target=_blank>fig|6666666.640629.peg.3100</a>	yes
B	Clustering-based subsystems	no subcategory	CBSS-257314.1.peg.752	Adenine-specific methyltransferase (EC 2.1.1.72)	<input type=&#39;button&#39; value=&#39;find&#39; onclick=&#39;window.open("?page=SearchGene&fr=Adenine-specific methyltransferase (EC 2.1.1.72)&organism=59843.19&subsystem=CBSS-257314.1.peg.752&template_gene=fig|6666666.640629.peg.52");&#39;>	no	<a href=&#39;?page=Annotation&feature=fig|6666666.640629.peg.52&#39; target=_blank>fig|6666666.640629.peg.52</a>	yes
B	Clustering-based subsystems	no subcategory	CBSS-279010.5.peg.1697	FIG011856: hypothetical protein	<input type=&#39;button&#39; value=&#39;find&#39; onclick=&#39;window.open("?page=SearchGene&fr=FIG011856: hypothetical protein&organism=59843.19&subsystem=CBSS-279010.5.peg.1697&template_gene=fig|6666666.640629.peg.2333");&#39;>	no	<a href=&#39;?page=Annotation&feature=fig|6666666.640629.peg.2333&#39; target=_blank>fig|6666666.640629.peg.2333</a>	yes
B	Clustering-based subsystems	no subcategory	CBSS-288681.3.peg.1039	Conserved protein YqhG	<input type=&#39;button&#39; value=&#39;find&#39; onclick=&#39;window.open("?page=SearchGene&fr=Conserved protein YqhG&organism=59843.19&subsystem=CBSS-288681.3.peg.1039&template_gene=fig|6666666.640629.peg.344");&#39;>	no	<a href=&#39;?page=Annotation&feature=fig|6666666.640629.peg.344&#39; target=_blank>fig|6666666.640629.peg.344</a>	yes
B	Clustering-based subsystems	no subcategory	CBSS-349161.4.peg.2427	Pyruvate,phosphate dikinase (EC 2.7.9.1)	<input type=&#39;button&#39; value=&#39;find&#39; onclick=&#39;window.open("?page=SearchGene&fr=Pyruvate,phosphate dikinase (EC 2.7.9.1)&organism=59843.19&subsystem=CBSS-349161.4.peg.2427&template_gene=fig|6666666.640629.peg.1983");&#39;>	no	<a href=&#39;?page=Annotation&feature=fig|6666666.640629.peg.1983&#39; target=_blank>fig|6666666.640629.peg.1983</a>	yes
B	Clustering-based subsystems	no subcategory	Choline uptake and conversion to betaine clusters	FIG009707: Betaine operon transcriptional regulator	<input type=&#39;button&#39; value=&#39;find&#39; onclick=&#39;window.open("?page=SearchGene&fr=FIG009707: Betaine operon transcriptional regulator&organism=59843.19&subsystem=Choline_uptake_and_conversion_to_betaine_clusters&template_gene=fig|6666666.640629.peg.1938");&#39;>	no	<a href=&#39;?page=Annotation&feature=fig|6666666.640629.peg.1938&#39; target=_blank>fig|6666666.640629.peg.1938</a>, <a href=&#39;?page=Annotation&feature=fig|6666666.640629.peg.2721&#39; target=_blank>fig|6666666.640629.peg.2721</a>	yes
B	Clustering-based subsystems	no subcategory	EC699-706	FIG143828: Hypothetical protein YbgA	<input type=&#39;button&#39; value=&#39;find&#39; onclick=&#39;window.open("?page=SearchGene&fr=FIG143828: Hypothetical protein YbgA&organism=59843.19&subsystem=EC699-706&template_gene=fig|6666666.640629.peg.4262");&#39;>	no	<a href=&#39;?page=Annotation&feature=fig|6666666.640629.peg.4262&#39; target=_blank>fig|6666666.640629.peg.4262</a>	yes
B	Clustering-based subsystems	no subcategory	LMPTP YfkJ cluster	Inner membrane protein YihY, formerly thought to be RNase BN	<input type=&#39;button&#39; value=&#39;find&#39; onclick=&#39;window.open("?page=SearchGene&fr=Inner membrane protein YihY, formerly thought to be RNase BN&organism=59843.19&subsystem=LMPTP_YfkJ_cluster&template_gene=fig|6666666.640629.peg.3240");&#39;>	no	<a href=&#39;?page=Annotation&feature=fig|6666666.640629.peg.3240&#39; target=_blank>fig|6666666.640629.peg.3240</a>	yes
B	Clustering-based subsystems	no subcategory	NusA-TFII Cluster	YlxP-like protein	<input type=&#39;button&#39; value=&#39;find&#39; onclick=&#39;window.open("?page=SearchGene&fr=YlxP-like protein&organism=59843.19&subsystem=NusA-TFII_Cluster&template_gene=fig|6666666.640629.peg.3468");&#39;>	no	<a href=&#39;?page=Annotation&feature=fig|6666666.640629.peg.3468&#39; target=_blank>fig|6666666.640629.peg.3468</a>	yes
B	Clustering-based subsystems	no subcategory	Sigma-B stress response cluster 1	Anti-sigma B factor RsbT	<input type=&#39;button&#39; value=&#39;find&#39; onclick=&#39;window.open("?page=SearchGene&fr=Anti-sigma B factor RsbT&organism=59843.19&subsystem=Sigma-B_stress_response_cluster_1&template_gene=fig|6666666.640629.peg.3687");&#39;>	no	<a href=&#39;?page=Annotation&feature=fig|6666666.640629.peg.3687&#39; target=_blank>fig|6666666.640629.peg.3687</a>	yes
B	Clustering-based subsystems	no subcategory	Sigma-B stress response cluster 1	Anti-sigma B factor antagonist RsbV	<input type=&#39;button&#39; value=&#39;find&#39; onclick=&#39;window.open("?page=SearchGene&fr=Anti-sigma B factor antagonist RsbV&organism=59843.19&subsystem=Sigma-B_stress_response_cluster_1&template_gene=fig|6666666.640629.peg.3685");&#39;>	no	<a href=&#39;?page=Annotation&feature=fig|6666666.640629.peg.3685&#39; target=_blank>fig|6666666.640629.peg.3685</a>	yes
B	Clustering-based subsystems	no subcategory	Sigma-B stress response cluster 1	Phosphoserine phosphatase RsbX (EC 3.1.3.3)	<input type=&#39;button&#39; value=&#39;find&#39; onclick=&#39;window.open("?page=SearchGene&fr=Phosphoserine phosphatase RsbX (EC 3.1.3.3)&organism=59843.19&subsystem=Sigma-B_stress_response_cluster_1&template_gene=fig|6666666.640629.peg.3682");&#39;>	no	<a href=&#39;?page=Annotation&feature=fig|6666666.640629.peg.3682&#39; target=_blank>fig|6666666.640629.peg.3682</a>	yes
B	Clustering-based subsystems	no subcategory	Sigma-B stress response cluster 1	RsbR, positive regulator of sigma-B	<input type=&#39;button&#39; value=&#39;find&#39; onclick=&#39;window.open("?page=SearchGene&fr=RsbR, positive regulator of sigma-B&organism=59843.19&subsystem=Sigma-B_stress_response_cluster_1&template_gene=fig|6666666.640629.peg.1689");&#39;>	no	<a href=&#39;?page=Annotation&feature=fig|6666666.640629.peg.1689&#39; target=_blank>fig|6666666.640629.peg.1689</a>, <a href=&#39;?page=Annotation&feature=fig|6666666.640629.peg.3596&#39; target=_blank>fig|6666666.640629.peg.3596</a>, <a href=&#39;?page=Annotation&feature=fig|6666666.640629.peg.3890&#39; target=_blank>fig|6666666.640629.peg.3890</a>	yes
B	Clustering-based subsystems	no subcategory	Sigma-B stress response cluster 1	RsbS, negative regulator of sigma-B	<input type=&#39;button&#39; value=&#39;find&#39; onclick=&#39;window.open("?page=SearchGene&fr=RsbS, negative regulator of sigma-B&organism=59843.19&subsystem=Sigma-B_stress_response_cluster_1&template_gene=fig|6666666.640629.peg.3688");&#39;>	no	<a href=&#39;?page=Annotation&feature=fig|6666666.640629.peg.3688&#39; target=_blank>fig|6666666.640629.peg.3688</a>	yes
A	Clustering-based subsystems	proteosome related	Cluster-based Subsystem Grouping Hypotheticals - perhaps Proteosome Related	Twin-arginine translocation protein TatA	<a href=&#39;?page=Annotation&feature=fig|59843.19.peg.907&#39; target=_blank>fig|59843.19.peg.907</a>, <a href=&#39;?page=Annotation&feature=fig|59843.19.peg.1703&#39; target=_blank>fig|59843.19.peg.1703</a>, <a href=&#39;?page=Annotation&feature=fig|59843.19.peg.2690&#39; target=_blank>fig|59843.19.peg.2690</a>, <a href=&#39;?page=Annotation&feature=fig|59843.19.peg.5290&#39; target=_blank>fig|…	yes	<input type=&#39;button&#39; class=&#39;button&#39; value=&#39;find&#39; onclick=&#39;window.open("?page=SearchGene&fr=Twin-arginine translocation protein TatA&organism=6666666.640629&subsystem=Cluster-based_Subsystem_Grouping_Hypotheticals_-_perhaps_Proteosome_Related&template_gene=fig|59843.19.peg.907");&#39;>	no
A	Clustering-based subsystems	proteosome related	Cluster-based Subsystem Grouping Hypotheticals - perhaps Proteosome Related	Twin-arginine translocation protein TatC	<a href=&#39;?page=Annotation&feature=fig|59843.19.peg.2686&#39; target=_blank>fig|59843.19.peg.2686</a>, <a href=&#39;?page=Annotation&feature=fig|59843.19.peg.5291&#39; target=_blank>fig|59843.19.peg.5291</a>	yes	<input type=&#39;button&#39; class=&#39;button&#39; value=&#39;find&#39; onclick=&#39;window.open("?page=SearchGene&fr=Twin-arginine translocation protein TatC&organism=6666666.640629&subsystem=Cluster-based_Subsystem_Grouping_Hypotheticals_-_perhaps_Proteosome_Related&template_gene=fig|59843.19.peg.2686");&#39;>	no
A and B	Cofactors, Vitamins, Prosthetic Groups, Pigments	Biotin	Biotin biosynthesis Experimental	Biotin synthase (EC 2.8.1.6)	<a href=&#39;?page=Annotation&feature=fig|59843.19.peg.4421&#39; target=_blank>fig|59843.19.peg.4421</a>	yes	<a href=&#39;?page=Annotation&feature=fig|6666666.640629.peg.436&#39; target=_blank>fig|6666666.640629.peg.436</a>	yes
A and B	Cofactors, Vitamins, Prosthetic Groups, Pigments	Biotin	Biotin biosynthesis Experimental	Competence protein F homolog, phosphoribosyltransferase domain	<a href=&#39;?page=Annotation&feature=fig|59843.19.peg.1529&#39; target=_blank>fig|59843.19.peg.1529</a>	yes	<a href=&#39;?page=Annotation&feature=fig|6666666.640629.peg.937&#39; target=_blank>fig|6666666.640629.peg.937</a>	yes
B	Cofactors, Vitamins, Prosthetic Groups, Pigments	Biotin	Biotin biosynthesis	3-ketoacyl-CoA thiolase (EC 2.3.1.16)	<input type=&#39;button&#39; value=&#39;find&#39; onclick=&#39;window.open("?page=SearchGene&fr=3-ketoacyl-CoA thiolase (EC 2.3.1.16)&organism=59843.19&subsystem=Biotin_biosynthesis&template_gene=fig|6666666.640629.peg.1067");&#39;>	no	<a href=&#39;?page=Annotation&feature=fig|6666666.640629.peg.1067&#39; target=_blank>fig|6666666.640629.peg.1067</a>, <a href=&#39;?page=Annotation&feature=fig|6666666.640629.peg.1090&#39; target=_blank>fig|6666666.640629.peg.1090</a>, <a href=&#39;?page=Annotation&feature=fig|6666666.640629.peg.1104&#39; target=_blank>fig|6666666.640629.peg.1104</a>, <a href=&#39;?page=Annotation&feature=fig|666…	yes
B	Cofactors, Vitamins, Prosthetic Groups, Pigments	Biotin	Biotin biosynthesis	Substrate-specific component BioY of biotin ECF transporter	<input type=&#39;button&#39; value=&#39;find&#39; onclick=&#39;window.open("?page=SearchGene&fr=Substrate-specific component BioY of biotin ECF transporter&organism=59843.19&subsystem=Biotin_biosynthesis&template_gene=fig|6666666.640629.peg.3856");&#39;>	no	<a href=&#39;?page=Annotation&feature=fig|6666666.640629.peg.3856&#39; target=_blank>fig|6666666.640629.peg.3856</a>, <a href=&#39;?page=Annotation&feature=fig|6666666.640629.peg.4209&#39; target=_blank>fig|6666666.640629.peg.4209</a>	yes
A and B	Cofactors, Vitamins, Prosthetic Groups, Pigments	Coenzyme A	Coenzyme A Biosynthesis	2-dehydropantoate 2-reductase (EC 1.1.1.169)	<a href=&#39;?page=Annotation&feature=fig|59843.19.peg.3709&#39; target=_blank>fig|59843.19.peg.3709</a>	yes	<a href=&#39;?page=Annotation&feature=fig|6666666.640629.peg.1077&#39; target=_blank>fig|6666666.640629.peg.1077</a>, <a href=&#39;?page=Annotation&feature=fig|6666666.640629.peg.2308&#39; target=_blank>fig|6666666.640629.peg.2308</a>, <a href=&#39;?page=Annotation&feature=fig|6666666.640629.peg.3228&#39; target=_blank>fig|6666666.640629.peg.3228</a>	yes
A and B	Cofactors, Vitamins, Prosthetic Groups, Pigments	Coenzyme A	Coenzyme A Biosynthesis	3-methyl-2-oxobutanoate hydroxymethyltransferase (EC 2.1.2.11)	<a href=&#39;?page=Annotation&feature=fig|59843.19.peg.4172&#39; target=_blank>fig|59843.19.peg.4172</a>	yes	<a href=&#39;?page=Annotation&feature=fig|6666666.640629.peg.2479&#39; target=_blank>fig|6666666.640629.peg.2479</a>	yes
A and B	Cofactors, Vitamins, Prosthetic Groups, Pigments	Coenzyme A	Coenzyme A Biosynthesis	Aspartate 1-decarboxylase (EC 4.1.1.11)	<a href=&#39;?page=Annotation&feature=fig|59843.19.peg.4174&#39; target=_blank>fig|59843.19.peg.4174</a>	yes	<a href=&#39;?page=Annotation&feature=fig|6666666.640629.peg.2477&#39; target=_blank>fig|6666666.640629.peg.2477</a>	yes
A and B	Cofactors, Vitamins, Prosthetic Groups, Pigments	Coenzyme A	Coenzyme A Biosynthesis	Dephospho-CoA kinase (EC 2.7.1.24)	<a href=&#39;?page=Annotation&feature=fig|59843.19.peg.484&#39; target=_blank>fig|59843.19.peg.484</a>	yes	<a href=&#39;?page=Annotation&feature=fig|6666666.640629.peg.95&#39; target=_blank>fig|6666666.640629.peg.95</a>	yes
A and B	Cofactors, Vitamins, Prosthetic Groups, Pigments	Coenzyme A	Coenzyme A Biosynthesis	Pantoate--beta-alanine ligase (EC 6.3.2.1)	<a href=&#39;?page=Annotation&feature=fig|59843.19.peg.4173&#39; target=_blank>fig|59843.19.peg.4173</a>	yes	<a href=&#39;?page=Annotation&feature=fig|6666666.640629.peg.2478&#39; target=_blank>fig|6666666.640629.peg.2478</a>	yes
A and B	Cofactors, Vitamins, Prosthetic Groups, Pigments	Coenzyme A	Coenzyme A Biosynthesis	Pantothenate kinase type III, CoaX-like (EC 2.7.1.33)	<a href=&#39;?page=Annotation&feature=fig|59843.19.peg.2044&#39; target=_blank>fig|59843.19.peg.2044</a>	yes	<a href=&#39;?page=Annotation&feature=fig|6666666.640629.peg.3820&#39; target=_blank>fig|6666666.640629.peg.3820</a>	yes
A and B	Cofactors, Vitamins, Prosthetic Groups, Pigments	Coenzyme A	Coenzyme A Biosynthesis	Phosphopantetheine adenylyltransferase (EC 2.7.7.3)	<a href=&#39;?page=Annotation&feature=fig|59843.19.peg.5518&#39; target=_blank>fig|59843.19.peg.5518</a>	yes	<a href=&#39;?page=Annotation&feature=fig|6666666.640629.peg.2297&#39; target=_blank>fig|6666666.640629.peg.2297</a>	yes
A and B	Cofactors, Vitamins, Prosthetic Groups, Pigments	Coenzyme A	Coenzyme A Biosynthesis	Phosphopantothenoylcysteine decarboxylase (EC 4.1.1.36)	<a href=&#39;?page=Annotation&feature=fig|59843.19.peg.3881&#39; target=_blank>fig|59843.19.peg.3881</a>	yes	<a href=&#39;?page=Annotation&feature=fig|6666666.640629.peg.2360&#39; target=_blank>fig|6666666.640629.peg.2360</a>	yes
A and B	Cofactors, Vitamins, Prosthetic Groups, Pigments	Coenzyme A	Coenzyme A Biosynthesis	Phosphopantothenoylcysteine synthetase (EC 6.3.2.5)	<a href=&#39;?page=Annotation&feature=fig|59843.19.peg.3881&#39; target=_blank>fig|59843.19.peg.3881</a>	yes	<a href=&#39;?page=Annotation&feature=fig|6666666.640629.peg.2360&#39; target=_blank>fig|6666666.640629.peg.2360</a>	yes
A and B	Cofactors, Vitamins, Prosthetic Groups, Pigments	Coenzyme A	Coenzyme A Biosynthesis cluster	3-methyl-2-oxobutanoate hydroxymethyltransferase (EC 2.1.2.11)	<a href=&#39;?page=Annotation&feature=fig|59843.19.peg.4172&#39; target=_blank>fig|59843.19.peg.4172</a>	yes	<a href=&#39;?page=Annotation&feature=fig|6666666.640629.peg.2479&#39; target=_blank>fig|6666666.640629.peg.2479</a>	yes
A and B	Cofactors, Vitamins, Prosthetic Groups, Pigments	Coenzyme A	Coenzyme A Biosynthesis cluster	Aspartate 1-decarboxylase (EC 4.1.1.11)	<a href=&#39;?page=Annotation&feature=fig|59843.19.peg.4174&#39; target=_blank>fig|59843.19.peg.4174</a>	yes	<a href=&#39;?page=Annotation&feature=fig|6666666.640629.peg.2477&#39; target=_blank>fig|6666666.640629.peg.2477</a>	yes
A and B	Cofactors, Vitamins, Prosthetic Groups, Pigments	Coenzyme A	Coenzyme A Biosynthesis cluster	Pantoate--beta-alanine ligase (EC 6.3.2.1)	<a href=&#39;?page=Annotation&feature=fig|59843.19.peg.4173&#39; target=_blank>fig|59843.19.peg.4173</a>	yes	<a href=&#39;?page=Annotation&feature=fig|6666666.640629.peg.2478&#39; target=_blank>fig|6666666.640629.peg.2478</a>	yes
A and B	Cofactors, Vitamins, Prosthetic Groups, Pigments	Coenzyme A	Coenzyme A Biosynthesis cluster	Pantothenate kinase type III, CoaX-like (EC 2.7.1.33)	<a href=&#39;?page=Annotation&feature=fig|59843.19.peg.2044&#39; target=_blank>fig|59843.19.peg.2044</a>	yes	<a href=&#39;?page=Annotation&feature=fig|6666666.640629.peg.3820&#39; target=_blank>fig|6666666.640629.peg.3820</a>	yes
B	Cofactors, Vitamins, Prosthetic Groups, Pigments	Coenzyme A	Coenzyme A Biosynthesis	Pantothenate:Na+ symporter (TC 2.A.21.1.1)	<input type=&#39;button&#39; value=&#39;find&#39; onclick=&#39;window.open("?page=SearchGene&fr=Pantothenate:Na+ symporter (TC 2.A.21.1.1)&organism=59843.19&subsystem=Coenzyme_A_Biosynthesis&template_gene=fig|6666666.640629.peg.1045");&#39;>	no	<a href=&#39;?page=Annotation&feature=fig|6666666.640629.peg.1045&#39; target=_blank>fig|6666666.640629.peg.1045</a>, <a href=&#39;?page=Annotation&feature=fig|6666666.640629.peg.1046&#39; target=_blank>fig|6666666.640629.peg.1046</a>, <a href=&#39;?page=Annotation&feature=fig|6666666.640629.peg.1553&#39; target=_blank>fig|6666666.640629.peg.1553</a>, <a href=&#39;?page=Annotation&feature=fig|666…	yes
A and B	Cofactors, Vitamins, Prosthetic Groups, Pigments	Folate and pterines	5-FCL-like protein	5,10-methylenetetrahydrofolate reductase (EC 1.5.1.20)	<a href=&#39;?page=Annotation&feature=fig|59843.19.peg.3876&#39; target=_blank>fig|59843.19.peg.3876</a>	yes	<a href=&#39;?page=Annotation&feature=fig|6666666.640629.peg.3974&#39; target=_blank>fig|6666666.640629.peg.3974</a>	yes
A and B	Cofactors, Vitamins, Prosthetic Groups, Pigments	Folate and pterines	5-FCL-like protein	5-formyltetrahydrofolate cyclo-ligase (EC 6.3.3.2)	<a href=&#39;?page=Annotation&feature=fig|59843.19.peg.910&#39; target=_blank>fig|59843.19.peg.910</a>	yes	<a href=&#39;?page=Annotation&feature=fig|6666666.640629.peg.320&#39; target=_blank>fig|6666666.640629.peg.320</a>	yes
A and B	Cofactors, Vitamins, Prosthetic Groups, Pigments	Folate and pterines	5-FCL-like protein	Alcohol dehydrogenase (EC 1.1.1.1)	<a href=&#39;?page=Annotation&feature=fig|59843.19.peg.2521&#39; target=_blank>fig|59843.19.peg.2521</a>, <a href=&#39;?page=Annotation&feature=fig|59843.19.peg.3994&#39; target=_blank>fig|59843.19.peg.3994</a>	yes	<a href=&#39;?page=Annotation&feature=fig|6666666.640629.peg.2416&#39; target=_blank>fig|6666666.640629.peg.2416</a>, <a href=&#39;?page=Annotation&feature=fig|6666666.640629.peg.2734&#39; target=_blank>fig|6666666.640629.peg.2734</a>	yes
A and B	Cofactors, Vitamins, Prosthetic Groups, Pigments	Folate and pterines	5-FCL-like protein	Dihydrofolate reductase (EC 1.5.1.3)	<a href=&#39;?page=Annotation&feature=fig|59843.19.peg.1228&#39; target=_blank>fig|59843.19.peg.1228</a>, <a href=&#39;?page=Annotation&feature=fig|59843.19.peg.4344&#39; target=_blank>fig|59843.19.peg.4344</a>	yes	<a href=&#39;?page=Annotation&feature=fig|6666666.640629.peg.1990&#39; target=_blank>fig|6666666.640629.peg.1990</a>, <a href=&#39;?page=Annotation&feature=fig|6666666.640629.peg.2444&#39; target=_blank>fig|6666666.640629.peg.2444</a>	yes
A and B	Cofactors, Vitamins, Prosthetic Groups, Pigments	Folate and pterines	5-FCL-like protein	Dihydrolipoamide acetyltransferase component of pyruvate dehydrogenase complex (EC 2.3.1.12)	<a href=&#39;?page=Annotation&feature=fig|59843.19.peg.4341&#39; target=_blank>fig|59843.19.peg.4341</a>	yes	<a href=&#39;?page=Annotation&feature=fig|6666666.640629.peg.2252&#39; target=_blank>fig|6666666.640629.peg.2252</a>	yes
A and B	Cofactors, Vitamins, Prosthetic Groups, Pigments	Folate and pterines	5-FCL-like protein	Formyltetrahydrofolate deformylase (EC 3.5.1.10)	<a href=&#39;?page=Annotation&feature=fig|59843.19.peg.811&#39; target=_blank>fig|59843.19.peg.811</a>	yes	<a href=&#39;?page=Annotation&feature=fig|6666666.640629.peg.3266&#39; target=_blank>fig|6666666.640629.peg.3266</a>	yes
A and B	Cofactors, Vitamins, Prosthetic Groups, Pigments	Folate and pterines	5-FCL-like protein	Hydroxyethylthiazole kinase (EC 2.7.1.50)	<a href=&#39;?page=Annotation&feature=fig|59843.19.peg.3061&#39; target=_blank>fig|59843.19.peg.3061</a>	yes	<a href=&#39;?page=Annotation&feature=fig|6666666.640629.peg.4316&#39; target=_blank>fig|6666666.640629.peg.4316</a>	yes
A and B	Cofactors, Vitamins, Prosthetic Groups, Pigments	Folate and pterines	5-FCL-like protein	Isocitrate dehydrogenase [NADP] (EC 1.1.1.42)	<a href=&#39;?page=Annotation&feature=fig|59843.19.peg.501&#39; target=_blank>fig|59843.19.peg.501</a>	yes	<a href=&#39;?page=Annotation&feature=fig|6666666.640629.peg.84&#39; target=_blank>fig|6666666.640629.peg.84</a>	yes
A and B	Cofactors, Vitamins, Prosthetic Groups, Pigments	Folate and pterines	5-FCL-like protein	Methylenetetrahydrofolate dehydrogenase (NADP+) (EC 1.5.1.5)	<a href=&#39;?page=Annotation&feature=fig|59843.19.peg.4037&#39; target=_blank>fig|59843.19.peg.4037</a>, <a href=&#39;?page=Annotation&feature=fig|59843.19.peg.5114&#39; target=_blank>fig|59843.19.peg.5114</a>	yes	<a href=&#39;?page=Annotation&feature=fig|6666666.640629.peg.373&#39; target=_blank>fig|6666666.640629.peg.373</a>	yes
A and B	Cofactors, Vitamins, Prosthetic Groups, Pigments	Folate and pterines	5-FCL-like protein	Phosphoribosylaminoimidazolecarboxamide formyltransferase (EC 2.1.2.3)	<a href=&#39;?page=Annotation&feature=fig|59843.19.peg.2926&#39; target=_blank>fig|59843.19.peg.2926</a>	yes	<a href=&#39;?page=Annotation&feature=fig|6666666.640629.peg.1805&#39; target=_blank>fig|6666666.640629.peg.1805</a>	yes
A and B	Cofactors, Vitamins, Prosthetic Groups, Pigments	Folate and pterines	5-FCL-like protein	Phosphoribosylglycinamide formyltransferase (EC 2.1.2.2)	<a href=&#39;?page=Annotation&feature=fig|59843.19.peg.2925&#39; target=_blank>fig|59843.19.peg.2925</a>	yes	<a href=&#39;?page=Annotation&feature=fig|6666666.640629.peg.1806&#39; target=_blank>fig|6666666.640629.peg.1806</a>	yes
A and B	Cofactors, Vitamins, Prosthetic Groups, Pigments	Folate and pterines	5-FCL-like protein	Serine hydroxymethyltransferase (EC 2.1.2.1)	<a href=&#39;?page=Annotation&feature=fig|59843.19.peg.1572&#39; target=_blank>fig|59843.19.peg.1572</a>	yes	<a href=&#39;?page=Annotation&feature=fig|6666666.640629.peg.3021&#39; target=_blank>fig|6666666.640629.peg.3021</a>	yes
A and B	Cofactors, Vitamins, Prosthetic Groups, Pigments	Folate and pterines	5-FCL-like protein	Thiamin-phosphate pyrophosphorylase (EC 2.5.1.3)	<a href=&#39;?page=Annotation&feature=fig|59843.19.peg.3063&#39; target=_blank>fig|59843.19.peg.3063</a>, <a href=&#39;?page=Annotation&feature=fig|59843.19.peg.3255&#39; target=_blank>fig|59843.19.peg.3255</a>	yes	<a href=&#39;?page=Annotation&feature=fig|6666666.640629.peg.2651&#39; target=_blank>fig|6666666.640629.peg.2651</a>, <a href=&#39;?page=Annotation&feature=fig|6666666.640629.peg.4317&#39; target=_blank>fig|6666666.640629.peg.4317</a>	yes
A and B	Cofactors, Vitamins, Prosthetic Groups, Pigments	Folate and pterines	Folate Biosynthesis	2-amino-4-hydroxy-6-hydroxymethyldihydropteridine pyrophosphokinase (EC 2.7.6.3)	<a href=&#39;?page=Annotation&feature=fig|59843.19.peg.2054&#39; target=_blank>fig|59843.19.peg.2054</a>	yes	<a href=&#39;?page=Annotation&feature=fig|6666666.640629.peg.3826&#39; target=_blank>fig|6666666.640629.peg.3826</a>	yes
A and B	Cofactors, Vitamins, Prosthetic Groups, Pigments	Folate and pterines	Folate Biosynthesis	5-formyltetrahydrofolate cyclo-ligase (EC 6.3.3.2)	<a href=&#39;?page=Annotation&feature=fig|59843.19.peg.910&#39; target=_blank>fig|59843.19.peg.910</a>	yes	<a href=&#39;?page=Annotation&feature=fig|6666666.640629.peg.320&#39; target=_blank>fig|6666666.640629.peg.320</a>	yes
A and B	Cofactors, Vitamins, Prosthetic Groups, Pigments	Folate and pterines	Folate Biosynthesis	Aminodeoxychorismate lyase (EC 4.1.3.38)	<a href=&#39;?page=Annotation&feature=fig|59843.19.peg.2051&#39; target=_blank>fig|59843.19.peg.2051</a>	yes	<a href=&#39;?page=Annotation&feature=fig|6666666.640629.peg.3892&#39; target=_blank>fig|6666666.640629.peg.3892</a>	yes
A and B	Cofactors, Vitamins, Prosthetic Groups, Pigments	Folate and pterines	Folate Biosynthesis	Dihydrofolate reductase (EC 1.5.1.3)	<a href=&#39;?page=Annotation&feature=fig|59843.19.peg.1228&#39; target=_blank>fig|59843.19.peg.1228</a>, <a href=&#39;?page=Annotation&feature=fig|59843.19.peg.4344&#39; target=_blank>fig|59843.19.peg.4344</a>	yes	<a href=&#39;?page=Annotation&feature=fig|6666666.640629.peg.1990&#39; target=_blank>fig|6666666.640629.peg.1990</a>, <a href=&#39;?page=Annotation&feature=fig|6666666.640629.peg.2444&#39; target=_blank>fig|6666666.640629.peg.2444</a>	yes
A and B	Cofactors, Vitamins, Prosthetic Groups, Pigments	Folate and pterines	Folate Biosynthesis	Dihydrofolate synthase (EC 6.3.2.12)	<a href=&#39;?page=Annotation&feature=fig|59843.19.peg.3430&#39; target=_blank>fig|59843.19.peg.3430</a>	yes	<a href=&#39;?page=Annotation&feature=fig|6666666.640629.peg.166&#39; target=_blank>fig|6666666.640629.peg.166</a>	yes
A and B	Cofactors, Vitamins, Prosthetic Groups, Pigments	Folate and pterines	Folate Biosynthesis	Dihydroneopterin aldolase (EC 4.1.2.25)	<a href=&#39;?page=Annotation&feature=fig|59843.19.peg.2053&#39; target=_blank>fig|59843.19.peg.2053</a>	yes	<a href=&#39;?page=Annotation&feature=fig|6666666.640629.peg.3825&#39; target=_blank>fig|6666666.640629.peg.3825</a>	yes
A and B	Cofactors, Vitamins, Prosthetic Groups, Pigments	Folate and pterines	Folate Biosynthesis	Dihydropteroate synthase (EC 2.5.1.15)	<a href=&#39;?page=Annotation&feature=fig|59843.19.peg.2052&#39; target=_blank>fig|59843.19.peg.2052</a>	yes	<a href=&#39;?page=Annotation&feature=fig|6666666.640629.peg.3824&#39; target=_blank>fig|6666666.640629.peg.3824</a>	yes
A and B	Cofactors, Vitamins, Prosthetic Groups, Pigments	Folate and pterines	Folate Biosynthesis	Folylpolyglutamate synthase (EC 6.3.2.17)	<a href=&#39;?page=Annotation&feature=fig|59843.19.peg.3430&#39; target=_blank>fig|59843.19.peg.3430</a>	yes	<a href=&#39;?page=Annotation&feature=fig|6666666.640629.peg.166&#39; target=_blank>fig|6666666.640629.peg.166</a>	yes
A and B	Cofactors, Vitamins, Prosthetic Groups, Pigments	Folate and pterines	Folate Biosynthesis	Para-aminobenzoate synthase, amidotransferase component (EC 2.6.1.85)	<a href=&#39;?page=Annotation&feature=fig|59843.19.peg.2050&#39; target=_blank>fig|59843.19.peg.2050</a>	yes	<a href=&#39;?page=Annotation&feature=fig|6666666.640629.peg.3307&#39; target=_blank>fig|6666666.640629.peg.3307</a>	yes
A and B	Cofactors, Vitamins, Prosthetic Groups, Pigments	Folate and pterines	Folate Biosynthesis	Para-aminobenzoate synthase, aminase component (EC 2.6.1.85)	<a href=&#39;?page=Annotation&feature=fig|59843.19.peg.2049&#39; target=_blank>fig|59843.19.peg.2049</a>	yes	<a href=&#39;?page=Annotation&feature=fig|6666666.640629.peg.3892&#39; target=_blank>fig|6666666.640629.peg.3892</a>	yes
A and B	Cofactors, Vitamins, Prosthetic Groups, Pigments	Folate and pterines	Folate Biosynthesis	Thymidylate synthase (EC 2.1.1.45)	<a href=&#39;?page=Annotation&feature=fig|59843.19.peg.4343&#39; target=_blank>fig|59843.19.peg.4343</a>	yes	<a href=&#39;?page=Annotation&feature=fig|6666666.640629.peg.2445&#39; target=_blank>fig|6666666.640629.peg.2445</a>	yes
A and B	Cofactors, Vitamins, Prosthetic Groups, Pigments	Folate and pterines	Folate biosynthesis cluster	2-amino-4-hydroxy-6-hydroxymethyldihydropteridine pyrophosphokinase (EC 2.7.6.3)	<a href=&#39;?page=Annotation&feature=fig|59843.19.peg.2054&#39; target=_blank>fig|59843.19.peg.2054</a>	yes	<a href=&#39;?page=Annotation&feature=fig|6666666.640629.peg.3826&#39; target=_blank>fig|6666666.640629.peg.3826</a>	yes
A and B	Cofactors, Vitamins, Prosthetic Groups, Pigments	Folate and pterines	Folate biosynthesis cluster	Aspartate 1-decarboxylase (EC 4.1.1.11)	<a href=&#39;?page=Annotation&feature=fig|59843.19.peg.4174&#39; target=_blank>fig|59843.19.peg.4174</a>	yes	<a href=&#39;?page=Annotation&feature=fig|6666666.640629.peg.2477&#39; target=_blank>fig|6666666.640629.peg.2477</a>	yes
A and B	Cofactors, Vitamins, Prosthetic Groups, Pigments	Folate and pterines	Folate biosynthesis cluster	Dihydroneopterin aldolase (EC 4.1.2.25)	<a href=&#39;?page=Annotation&feature=fig|59843.19.peg.2053&#39; target=_blank>fig|59843.19.peg.2053</a>	yes	<a href=&#39;?page=Annotation&feature=fig|6666666.640629.peg.3825&#39; target=_blank>fig|6666666.640629.peg.3825</a>	yes
A and B	Cofactors, Vitamins, Prosthetic Groups, Pigments	Folate and pterines	Folate biosynthesis cluster	Dihydropteroate synthase (EC 2.5.1.15)	<a href=&#39;?page=Annotation&feature=fig|59843.19.peg.2052&#39; target=_blank>fig|59843.19.peg.2052</a>	yes	<a href=&#39;?page=Annotation&feature=fig|6666666.640629.peg.3824&#39; target=_blank>fig|6666666.640629.peg.3824</a>	yes
A and B	Cofactors, Vitamins, Prosthetic Groups, Pigments	Folate and pterines	Folate biosynthesis cluster	Hypoxanthine-guanine phosphoribosyltransferase (EC 2.4.2.8)	<a href=&#39;?page=Annotation&feature=fig|59843.19.peg.2039&#39; target=_blank>fig|59843.19.peg.2039</a>	yes	<a href=&#39;?page=Annotation&feature=fig|6666666.640629.peg.3818&#39; target=_blank>fig|6666666.640629.peg.3818</a>	yes
A and B	Cofactors, Vitamins, Prosthetic Groups, Pigments	Folate and pterines	Folate biosynthesis cluster	Pantoate--beta-alanine ligase (EC 6.3.2.1)	<a href=&#39;?page=Annotation&feature=fig|59843.19.peg.4173&#39; target=_blank>fig|59843.19.peg.4173</a>	yes	<a href=&#39;?page=Annotation&feature=fig|6666666.640629.peg.2478&#39; target=_blank>fig|6666666.640629.peg.2478</a>	yes
A and B	Cofactors, Vitamins, Prosthetic Groups, Pigments	Folate and pterines	Folate biosynthesis cluster	tRNA(Ile)-lysidine synthetase (EC 6.3.4.19)	<a href=&#39;?page=Annotation&feature=fig|59843.19.peg.2038&#39; target=_blank>fig|59843.19.peg.2038</a>	yes	<a href=&#39;?page=Annotation&feature=fig|6666666.640629.peg.3817&#39; target=_blank>fig|6666666.640629.peg.3817</a>	yes
A and B	Cofactors, Vitamins, Prosthetic Groups, Pigments	Folate and pterines	Pterin carbinolamine dehydratase	Fumarylacetoacetate hydrolase family protein	<a href=&#39;?page=Annotation&feature=fig|59843.19.peg.258&#39; target=_blank>fig|59843.19.peg.258</a>	yes	<a href=&#39;?page=Annotation&feature=fig|6666666.640629.peg.1016&#39; target=_blank>fig|6666666.640629.peg.1016</a>, <a href=&#39;?page=Annotation&feature=fig|6666666.640629.peg.1197&#39; target=_blank>fig|6666666.640629.peg.1197</a>, <a href=&#39;?page=Annotation&feature=fig|6666666.640629.peg.1875&#39; target=_blank>fig|6666666.640629.peg.1875</a>	yes
A and B	Cofactors, Vitamins, Prosthetic Groups, Pigments	Folate and pterines	Pterin carbinolamine dehydratase	Pterin-4-alpha-carbinolamine dehydratase (EC 4.2.1.96)	<a href=&#39;?page=Annotation&feature=fig|59843.19.peg.2077&#39; target=_blank>fig|59843.19.peg.2077</a>	yes	<a href=&#39;?page=Annotation&feature=fig|6666666.640629.peg.3274&#39; target=_blank>fig|6666666.640629.peg.3274</a>	yes
A	Cofactors, Vitamins, Prosthetic Groups, Pigments	Folate and pterines	Folate Biosynthesis	GTP cyclohydrolase I (EC 3.5.4.16) type 1	<a href=&#39;?page=Annotation&feature=fig|59843.19.peg.2829&#39; target=_blank>fig|59843.19.peg.2829</a>	yes	<input type=&#39;button&#39; class=&#39;button&#39; value=&#39;find&#39; onclick=&#39;window.open("?page=SearchGene&fr=GTP cyclohydrolase I (EC 3.5.4.16) type 1&organism=6666666.640629&subsystem=Folate_Biosynthesis&template_gene=fig|59843.19.peg.2829");&#39;>	no
B	Cofactors, Vitamins, Prosthetic Groups, Pigments	Folate and pterines	5-FCL-like protein	Substrate-specific component ThiW of predicted thiazole ECF transporter	<input type=&#39;button&#39; value=&#39;find&#39; onclick=&#39;window.open("?page=SearchGene&fr=Substrate-specific component ThiW of predicted thiazole ECF transporter&organism=59843.19&subsystem=5-FCL-like_protein&template_gene=fig|6666666.640629.peg.4313");&#39;>	no	<a href=&#39;?page=Annotation&feature=fig|6666666.640629.peg.4313&#39; target=_blank>fig|6666666.640629.peg.4313</a>	yes
B	Cofactors, Vitamins, Prosthetic Groups, Pigments	Folate and pterines	5-FCL-like protein	Thiamine-monophosphate kinase (EC 2.7.4.16)	<input type=&#39;button&#39; value=&#39;find&#39; onclick=&#39;window.open("?page=SearchGene&fr=Thiamine-monophosphate kinase (EC 2.7.4.16)&organism=59843.19&subsystem=5-FCL-like_protein&template_gene=fig|6666666.640629.peg.4015");&#39;>	no	<a href=&#39;?page=Annotation&feature=fig|6666666.640629.peg.4015&#39; target=_blank>fig|6666666.640629.peg.4015</a>	yes
B	Cofactors, Vitamins, Prosthetic Groups, Pigments	Folate and pterines	Folate Biosynthesis	GTP cyclohydrolase I (EC 3.5.4.16) type 2	<input type=&#39;button&#39; value=&#39;find&#39; onclick=&#39;window.open("?page=SearchGene&fr=GTP cyclohydrolase I (EC 3.5.4.16) type 2&organism=59843.19&subsystem=Folate_Biosynthesis&template_gene=fig|6666666.640629.peg.3536");&#39;>	no	<a href=&#39;?page=Annotation&feature=fig|6666666.640629.peg.3536&#39; target=_blank>fig|6666666.640629.peg.3536</a>	yes
B	Cofactors, Vitamins, Prosthetic Groups, Pigments	Folate and pterines	Folate biosynthesis cluster	transmembrane protein, distant homology with ydbS	<input type=&#39;button&#39; value=&#39;find&#39; onclick=&#39;window.open("?page=SearchGene&fr=transmembrane protein, distant homology with ydbS&organism=59843.19&subsystem=Folate_biosynthesis_cluster&template_gene=fig|6666666.640629.peg.1296");&#39;>	no	<a href=&#39;?page=Annotation&feature=fig|6666666.640629.peg.1296&#39; target=_blank>fig|6666666.640629.peg.1296</a>	yes
A and B	Cofactors, Vitamins, Prosthetic Groups, Pigments	Lipoic acid	Lipoic acid metabolism	Lipoate-protein ligase A	<a href=&#39;?page=Annotation&feature=fig|59843.19.peg.780&#39; target=_blank>fig|59843.19.peg.780</a>	yes	<a href=&#39;?page=Annotation&feature=fig|6666666.640629.peg.1287&#39; target=_blank>fig|6666666.640629.peg.1287</a>, <a href=&#39;?page=Annotation&feature=fig|6666666.640629.peg.1421&#39; target=_blank>fig|6666666.640629.peg.1421</a>	yes
A and B	Cofactors, Vitamins, Prosthetic Groups, Pigments	NAD and NADP	NAD and NADP cofactor biosynthesis global	ADP-ribose pyrophosphatase (EC 3.6.1.13)	<a href=&#39;?page=Annotation&feature=fig|59843.19.peg.3864&#39; target=_blank>fig|59843.19.peg.3864</a>, <a href=&#39;?page=Annotation&feature=fig|59843.19.peg.4066&#39; target=_blank>fig|59843.19.peg.4066</a>, <a href=&#39;?page=Annotation&feature=fig|59843.19.peg.5369&#39; target=_blank>fig|59843.19.peg.5369</a>	yes	<a href=&#39;?page=Annotation&feature=fig|6666666.640629.peg.2588&#39; target=_blank>fig|6666666.640629.peg.2588</a>	yes
A and B	Cofactors, Vitamins, Prosthetic Groups, Pigments	NAD and NADP	NAD and NADP cofactor biosynthesis global	L-aspartate oxidase (EC 1.4.3.16)	<a href=&#39;?page=Annotation&feature=fig|59843.19.peg.2042&#39; target=_blank>fig|59843.19.peg.2042</a>	yes	<a href=&#39;?page=Annotation&feature=fig|6666666.640629.peg.3991&#39; target=_blank>fig|6666666.640629.peg.3991</a>	yes
A and B	Cofactors, Vitamins, Prosthetic Groups, Pigments	NAD and NADP	NAD and NADP cofactor biosynthesis global	N-Ribosylnicotinamide phosphorylase (EC 2.4.2.1)	<a href=&#39;?page=Annotation&feature=fig|59843.19.peg.4072&#39; target=_blank>fig|59843.19.peg.4072</a>	yes	<a href=&#39;?page=Annotation&feature=fig|6666666.640629.peg.2581&#39; target=_blank>fig|6666666.640629.peg.2581</a>	yes
A and B	Cofactors, Vitamins, Prosthetic Groups, Pigments	NAD and NADP	NAD and NADP cofactor biosynthesis global	NAD kinase (EC 2.7.1.23)	<a href=&#39;?page=Annotation&feature=fig|59843.19.peg.1103&#39; target=_blank>fig|59843.19.peg.1103</a>	yes	<a href=&#39;?page=Annotation&feature=fig|6666666.640629.peg.51&#39; target=_blank>fig|6666666.640629.peg.51</a>, <a href=&#39;?page=Annotation&feature=fig|6666666.640629.peg.1489&#39; target=_blank>fig|6666666.640629.peg.1489</a>	yes
A and B	Cofactors, Vitamins, Prosthetic Groups, Pigments	NAD and NADP	NAD and NADP cofactor biosynthesis global	NAD synthetase (EC 6.3.1.5)	<a href=&#39;?page=Annotation&feature=fig|59843.19.peg.2816&#39; target=_blank>fig|59843.19.peg.2816</a>	yes	<a href=&#39;?page=Annotation&feature=fig|6666666.640629.peg.190&#39; target=_blank>fig|6666666.640629.peg.190</a>, <a href=&#39;?page=Annotation&feature=fig|6666666.640629.peg.3279&#39; target=_blank>fig|6666666.640629.peg.3279</a>	yes
A and B	Cofactors, Vitamins, Prosthetic Groups, Pigments	NAD and NADP	NAD and NADP cofactor biosynthesis global	Nicotinamidase (EC 3.5.1.19)	<a href=&#39;?page=Annotation&feature=fig|59843.19.peg.5368&#39; target=_blank>fig|59843.19.peg.5368</a>	yes	<a href=&#39;?page=Annotation&feature=fig|6666666.640629.peg.3877&#39; target=_blank>fig|6666666.640629.peg.3877</a>	yes
A and B	Cofactors, Vitamins, Prosthetic Groups, Pigments	NAD and NADP	NAD and NADP cofactor biosynthesis global	Nicotinate-nucleotide adenylyltransferase (EC 2.7.7.18)	<a href=&#39;?page=Annotation&feature=fig|59843.19.peg.3617&#39; target=_blank>fig|59843.19.peg.3617</a>	yes	<a href=&#39;?page=Annotation&feature=fig|6666666.640629.peg.250&#39; target=_blank>fig|6666666.640629.peg.250</a>	yes
A and B	Cofactors, Vitamins, Prosthetic Groups, Pigments	NAD and NADP	NAD and NADP cofactor biosynthesis global	Predicted N-ribosylNicotinamide CRP-like regulator	<a href=&#39;?page=Annotation&feature=fig|59843.19.peg.1817&#39; target=_blank>fig|59843.19.peg.1817</a>, <a href=&#39;?page=Annotation&feature=fig|59843.19.peg.4522&#39; target=_blank>fig|59843.19.peg.4522</a>	yes	<a href=&#39;?page=Annotation&feature=fig|6666666.640629.peg.487&#39; target=_blank>fig|6666666.640629.peg.487</a>	yes
A and B	Cofactors, Vitamins, Prosthetic Groups, Pigments	NAD and NADP	NAD and NADP cofactor biosynthesis global	Quinolinate phosphoribosyltransferase [decarboxylating] (EC 2.4.2.19)	<a href=&#39;?page=Annotation&feature=fig|59843.19.peg.2043&#39; target=_blank>fig|59843.19.peg.2043</a>	yes	<a href=&#39;?page=Annotation&feature=fig|6666666.640629.peg.3990&#39; target=_blank>fig|6666666.640629.peg.3990</a>	yes
A and B	Cofactors, Vitamins, Prosthetic Groups, Pigments	NAD and NADP	NAD and NADP cofactor biosynthesis global	Quinolinate synthetase (EC 2.5.1.72)	<a href=&#39;?page=Annotation&feature=fig|59843.19.peg.2041&#39; target=_blank>fig|59843.19.peg.2041</a>	yes	<a href=&#39;?page=Annotation&feature=fig|6666666.640629.peg.3989&#39; target=_blank>fig|6666666.640629.peg.3989</a>	yes
A	Cofactors, Vitamins, Prosthetic Groups, Pigments	NAD and NADP	NAD and NADP cofactor biosynthesis global	Niacin transporter NiaP	<a href=&#39;?page=Annotation&feature=fig|59843.19.peg.1243&#39; target=_blank>fig|59843.19.peg.1243</a>	yes	<input type=&#39;button&#39; class=&#39;button&#39; value=&#39;find&#39; onclick=&#39;window.open("?page=SearchGene&fr=Niacin transporter NiaP&organism=6666666.640629&subsystem=NAD_and_NADP_cofactor_biosynthesis_global&template_gene=fig|59843.19.peg.1243");&#39;>	no
A	Cofactors, Vitamins, Prosthetic Groups, Pigments	NAD and NADP	NAD and NADP cofactor biosynthesis global	Nicotinamidase/isochorismatase family protein	<a href=&#39;?page=Annotation&feature=fig|59843.19.peg.3602&#39; target=_blank>fig|59843.19.peg.3602</a>	yes	<input type=&#39;button&#39; class=&#39;button&#39; value=&#39;find&#39; onclick=&#39;window.open("?page=SearchGene&fr=Nicotinamidase/isochorismatase family protein&organism=6666666.640629&subsystem=NAD_and_NADP_cofactor_biosynthesis_global&template_gene=fig|59843.19.peg.3602");&#39;>	no
B	Cofactors, Vitamins, Prosthetic Groups, Pigments	NAD and NADP	NAD and NADP cofactor biosynthesis global	Kynureninase (EC 3.7.1.3)	<input type=&#39;button&#39; value=&#39;find&#39; onclick=&#39;window.open("?page=SearchGene&fr=Kynureninase (EC 3.7.1.3)&organism=59843.19&subsystem=NAD_and_NADP_cofactor_biosynthesis_global&template_gene=fig|6666666.640629.peg.4341");&#39;>	no	<a href=&#39;?page=Annotation&feature=fig|6666666.640629.peg.4341&#39; target=_blank>fig|6666666.640629.peg.4341</a>	yes
B	Cofactors, Vitamins, Prosthetic Groups, Pigments	NAD and NADP	NAD and NADP cofactor biosynthesis global	Transcriptional repressor for NAD biosynthesis in gram-positives	<input type=&#39;button&#39; value=&#39;find&#39; onclick=&#39;window.open("?page=SearchGene&fr=Transcriptional repressor for NAD biosynthesis in gram-positives&organism=59843.19&subsystem=NAD_and_NADP_cofactor_biosynthesis_global&template_gene=fig|6666666.640629.peg.4358");&#39;>	no	<a href=&#39;?page=Annotation&feature=fig|6666666.640629.peg.4358&#39; target=_blank>fig|6666666.640629.peg.4358</a>	yes
A and B	Cofactors, Vitamins, Prosthetic Groups, Pigments	Pyridoxine	Pyridoxin(Vitamin B6) Degradation Pathway	Hypothetical NagD-like phosphatase	<a href=&#39;?page=Annotation&feature=fig|59843.19.peg.4311&#39; target=_blank>fig|59843.19.peg.4311</a>	yes	<a href=&#39;?page=Annotation&feature=fig|6666666.640629.peg.733&#39; target=_blank>fig|6666666.640629.peg.733</a>	yes
A	Cofactors, Vitamins, Prosthetic Groups, Pigments	Pyridoxine	Pyridoxin (Vitamin B6) Biosynthesis	4-hydroxythreonine-4-phosphate dehydrogenase (EC 1.1.1.262)	<a href=&#39;?page=Annotation&feature=fig|59843.19.peg.2287&#39; target=_blank>fig|59843.19.peg.2287</a>	yes	<input type=&#39;button&#39; class=&#39;button&#39; value=&#39;find&#39; onclick=&#39;window.open("?page=SearchGene&fr=4-hydroxythreonine-4-phosphate dehydrogenase (EC 1.1.1.262)&organism=6666666.640629&subsystem=Pyridoxin_(Vitamin_B6)_Biosynthesis&template_gene=fig|59843.19.peg.2287");&#39;>	no
A	Cofactors, Vitamins, Prosthetic Groups, Pigments	Quinone cofactors	Menaquinone and Phylloquinone Biosynthesis	Ubiquinone/menaquinone biosynthesis methyltransferase UbiE (EC 2.1.1.-)	<a href=&#39;?page=Annotation&feature=fig|59843.19.peg.1448&#39; target=_blank>fig|59843.19.peg.1448</a>	yes	<input type=&#39;button&#39; class=&#39;button&#39; value=&#39;find&#39; onclick=&#39;window.open("?page=SearchGene&fr=Ubiquinone/menaquinone biosynthesis methyltransferase UbiE (EC 2.1.1.-)&organism=6666666.640629&subsystem=Menaquinone_and_Phylloquinone_Biosynthesis&template_gene=fig|59843.19.peg.1448");&#39;>	no
B	Cofactors, Vitamins, Prosthetic Groups, Pigments	Quinone cofactors	Menaquinone and Phylloquinone Biosynthesis	1,4-dihydroxy-2-naphthoate polyprenyltransferase (EC 2.5.1.74)	<input type=&#39;button&#39; value=&#39;find&#39; onclick=&#39;window.open("?page=SearchGene&fr=1,4-dihydroxy-2-naphthoate polyprenyltransferase (EC 2.5.1.74)&organism=59843.19&subsystem=Menaquinone_and_Phylloquinone_Biosynthesis&template_gene=fig|6666666.640629.peg.694");&#39;>	no	<a href=&#39;?page=Annotation&feature=fig|6666666.640629.peg.694&#39; target=_blank>fig|6666666.640629.peg.694</a>	yes
B	Cofactors, Vitamins, Prosthetic Groups, Pigments	Quinone cofactors	Menaquinone and Phylloquinone Biosynthesis	2-succinyl-5-enolpyruvyl-6-hydroxy-3-cyclohexene-1-carboxylic-acid synthase (EC 2.2.1.9)	<input type=&#39;button&#39; value=&#39;find&#39; onclick=&#39;window.open("?page=SearchGene&fr=2-succinyl-5-enolpyruvyl-6-hydroxy-3-cyclohexene-1-carboxylic-acid synthase (EC 2.2.1.9)&organism=59843.19&subsystem=Menaquinone_and_Phylloquinone_Biosynthesis&template_gene=fig|6666666.640629.peg.692");&#39;>	no	<a href=&#39;?page=Annotation&feature=fig|6666666.640629.peg.692&#39; target=_blank>fig|6666666.640629.peg.692</a>	yes
B	Cofactors, Vitamins, Prosthetic Groups, Pigments	Quinone cofactors	Menaquinone and Phylloquinone Biosynthesis	2-succinyl-6-hydroxy-2,4-cyclohexadiene-1-carboxylate synthase (EC 4.2.99.20)	<input type=&#39;button&#39; value=&#39;find&#39; onclick=&#39;window.open("?page=SearchGene&fr=2-succinyl-6-hydroxy-2,4-cyclohexadiene-1-carboxylate synthase (EC 4.2.99.20)&organism=59843.19&subsystem=Menaquinone_and_Phylloquinone_Biosynthesis&template_gene=fig|6666666.640629.peg.691");&#39;>	no	<a href=&#39;?page=Annotation&feature=fig|6666666.640629.peg.691&#39; target=_blank>fig|6666666.640629.peg.691</a>	yes
B	Cofactors, Vitamins, Prosthetic Groups, Pigments	Quinone cofactors	Menaquinone and Phylloquinone Biosynthesis	Menaquinone-specific isochorismate synthase (EC 5.4.4.2)	<input type=&#39;button&#39; value=&#39;find&#39; onclick=&#39;window.open("?page=SearchGene&fr=Menaquinone-specific isochorismate synthase (EC 5.4.4.2)&organism=59843.19&subsystem=Menaquinone_and_Phylloquinone_Biosynthesis&template_gene=fig|6666666.640629.peg.693");&#39;>	no	<a href=&#39;?page=Annotation&feature=fig|6666666.640629.peg.693&#39; target=_blank>fig|6666666.640629.peg.693</a>	yes
B	Cofactors, Vitamins, Prosthetic Groups, Pigments	Quinone cofactors	Menaquinone and Phylloquinone Biosynthesis	Naphthoate synthase (EC 4.1.3.36)	<input type=&#39;button&#39; value=&#39;find&#39; onclick=&#39;window.open("?page=SearchGene&fr=Naphthoate synthase (EC 4.1.3.36)&organism=59843.19&subsystem=Menaquinone_and_Phylloquinone_Biosynthesis&template_gene=fig|6666666.640629.peg.690");&#39;>	no	<a href=&#39;?page=Annotation&feature=fig|6666666.640629.peg.690&#39; target=_blank>fig|6666666.640629.peg.690</a>	yes
B	Cofactors, Vitamins, Prosthetic Groups, Pigments	Quinone cofactors	Menaquinone and Phylloquinone Biosynthesis	O-succinylbenzoate synthase (EC 4.2.1.113)	<input type=&#39;button&#39; value=&#39;find&#39; onclick=&#39;window.open("?page=SearchGene&fr=O-succinylbenzoate synthase (EC 4.2.1.113)&organism=59843.19&subsystem=Menaquinone_and_Phylloquinone_Biosynthesis&template_gene=fig|6666666.640629.peg.688");&#39;>	no	<a href=&#39;?page=Annotation&feature=fig|6666666.640629.peg.688&#39; target=_blank>fig|6666666.640629.peg.688</a>	yes
B	Cofactors, Vitamins, Prosthetic Groups, Pigments	Quinone cofactors	Menaquinone and Phylloquinone Biosynthesis	O-succinylbenzoic acid--CoA ligase (EC 6.2.1.26)	<input type=&#39;button&#39; value=&#39;find&#39; onclick=&#39;window.open("?page=SearchGene&fr=O-succinylbenzoic acid--CoA ligase (EC 6.2.1.26)&organism=59843.19&subsystem=Menaquinone_and_Phylloquinone_Biosynthesis&template_gene=fig|6666666.640629.peg.689");&#39;>	no	<a href=&#39;?page=Annotation&feature=fig|6666666.640629.peg.689&#39; target=_blank>fig|6666666.640629.peg.689</a>	yes
A and B	Cofactors, Vitamins, Prosthetic Groups, Pigments	Riboflavin, FMN, FAD	Riboflavin, FMN and FAD metabolism	3,4-dihydroxy-2-butanone 4-phosphate synthase (EC 4.1.99.12)	<a href=&#39;?page=Annotation&feature=fig|59843.19.peg.4086&#39; target=_blank>fig|59843.19.peg.4086</a>	yes	<a href=&#39;?page=Annotation&feature=fig|6666666.640629.peg.4255&#39; target=_blank>fig|6666666.640629.peg.4255</a>	yes
A and B	Cofactors, Vitamins, Prosthetic Groups, Pigments	Riboflavin, FMN, FAD	Riboflavin, FMN and FAD metabolism	5-amino-6-(5-phosphoribosylamino)uracil reductase (EC 1.1.1.193)	<a href=&#39;?page=Annotation&feature=fig|59843.19.peg.4084&#39; target=_blank>fig|59843.19.peg.4084</a>	yes	<a href=&#39;?page=Annotation&feature=fig|6666666.640629.peg.4253&#39; target=_blank>fig|6666666.640629.peg.4253</a>	yes
A and B	Cofactors, Vitamins, Prosthetic Groups, Pigments	Riboflavin, FMN, FAD	Riboflavin, FMN and FAD metabolism	6,7-dimethyl-8-ribityllumazine synthase (EC 2.5.1.78)	<a href=&#39;?page=Annotation&feature=fig|59843.19.peg.4087&#39; target=_blank>fig|59843.19.peg.4087</a>	yes	<a href=&#39;?page=Annotation&feature=fig|6666666.640629.peg.4256&#39; target=_blank>fig|6666666.640629.peg.4256</a>	yes
A and B	Cofactors, Vitamins, Prosthetic Groups, Pigments	Riboflavin, FMN, FAD	Riboflavin, FMN and FAD metabolism	Diaminohydroxyphosphoribosylaminopyrimidine deaminase (EC 3.5.4.26)	<a href=&#39;?page=Annotation&feature=fig|59843.19.peg.4084&#39; target=_blank>fig|59843.19.peg.4084</a>	yes	<a href=&#39;?page=Annotation&feature=fig|6666666.640629.peg.4253&#39; target=_blank>fig|6666666.640629.peg.4253</a>	yes
A and B	Cofactors, Vitamins, Prosthetic Groups, Pigments	Riboflavin, FMN, FAD	Riboflavin, FMN and FAD metabolism	FMN adenylyltransferase (EC 2.7.7.2)	<a href=&#39;?page=Annotation&feature=fig|59843.19.peg.5411&#39; target=_blank>fig|59843.19.peg.5411</a>	yes	<a href=&#39;?page=Annotation&feature=fig|6666666.640629.peg.3951&#39; target=_blank>fig|6666666.640629.peg.3951</a>	yes
A and B	Cofactors, Vitamins, Prosthetic Groups, Pigments	Riboflavin, FMN, FAD	Riboflavin, FMN and FAD metabolism	GTP cyclohydrolase II (EC 3.5.4.25)	<a href=&#39;?page=Annotation&feature=fig|59843.19.peg.4086&#39; target=_blank>fig|59843.19.peg.4086</a>	yes	<a href=&#39;?page=Annotation&feature=fig|6666666.640629.peg.4255&#39; target=_blank>fig|6666666.640629.peg.4255</a>	yes
A and B	Cofactors, Vitamins, Prosthetic Groups, Pigments	Riboflavin, FMN, FAD	Riboflavin, FMN and FAD metabolism	Riboflavin kinase (EC 2.7.1.26)	<a href=&#39;?page=Annotation&feature=fig|59843.19.peg.5411&#39; target=_blank>fig|59843.19.peg.5411</a>	yes	<a href=&#39;?page=Annotation&feature=fig|6666666.640629.peg.3951&#39; target=_blank>fig|6666666.640629.peg.3951</a>	yes
A and B	Cofactors, Vitamins, Prosthetic Groups, Pigments	Riboflavin, FMN, FAD	Riboflavin, FMN and FAD metabolism	Riboflavin synthase eubacterial/eukaryotic (EC 2.5.1.9)	<a href=&#39;?page=Annotation&feature=fig|59843.19.peg.4085&#39; target=_blank>fig|59843.19.peg.4085</a>	yes	<a href=&#39;?page=Annotation&feature=fig|6666666.640629.peg.4254&#39; target=_blank>fig|6666666.640629.peg.4254</a>	yes
A and B	Cofactors, Vitamins, Prosthetic Groups, Pigments	Riboflavin, FMN, FAD	riboflavin to FAD	3,4-dihydroxy-2-butanone 4-phosphate synthase (EC 4.1.99.12)	<a href=&#39;?page=Annotation&feature=fig|59843.19.peg.4086&#39; target=_blank>fig|59843.19.peg.4086</a>	yes	<a href=&#39;?page=Annotation&feature=fig|6666666.640629.peg.4255&#39; target=_blank>fig|6666666.640629.peg.4255</a>	yes
A and B	Cofactors, Vitamins, Prosthetic Groups, Pigments	Riboflavin, FMN, FAD	riboflavin to FAD	FMN adenylyltransferase (EC 2.7.7.2)	<a href=&#39;?page=Annotation&feature=fig|59843.19.peg.5411&#39; target=_blank>fig|59843.19.peg.5411</a>	yes	<a href=&#39;?page=Annotation&feature=fig|6666666.640629.peg.3951&#39; target=_blank>fig|6666666.640629.peg.3951</a>	yes
A and B	Cofactors, Vitamins, Prosthetic Groups, Pigments	Riboflavin, FMN, FAD	riboflavin to FAD	Riboflavin kinase (EC 2.7.1.26)	<a href=&#39;?page=Annotation&feature=fig|59843.19.peg.5411&#39; target=_blank>fig|59843.19.peg.5411</a>	yes	<a href=&#39;?page=Annotation&feature=fig|6666666.640629.peg.3951&#39; target=_blank>fig|6666666.640629.peg.3951</a>	yes
A and B	Cofactors, Vitamins, Prosthetic Groups, Pigments	Riboflavin, FMN, FAD	riboflavin to FAD	Riboflavin synthase eubacterial/eukaryotic (EC 2.5.1.9)	<a href=&#39;?page=Annotation&feature=fig|59843.19.peg.4085&#39; target=_blank>fig|59843.19.peg.4085</a>	yes	<a href=&#39;?page=Annotation&feature=fig|6666666.640629.peg.4254&#39; target=_blank>fig|6666666.640629.peg.4254</a>	yes
A	Cofactors, Vitamins, Prosthetic Groups, Pigments	Riboflavin, FMN, FAD	Flavodoxin	Flavodoxin 2	<a href=&#39;?page=Annotation&feature=fig|59843.19.peg.2345&#39; target=_blank>fig|59843.19.peg.2345</a>	yes	<input type=&#39;button&#39; class=&#39;button&#39; value=&#39;find&#39; onclick=&#39;window.open("?page=SearchGene&fr=Flavodoxin 2&organism=6666666.640629&subsystem=Flavodoxin&template_gene=fig|59843.19.peg.2345");&#39;>	no
A	Cofactors, Vitamins, Prosthetic Groups, Pigments	Riboflavin, FMN, FAD	Flavodoxin	NAD(P)H oxidoreductase YRKL (EC 1.6.99.-)	<a href=&#39;?page=Annotation&feature=fig|59843.19.peg.2345&#39; target=_blank>fig|59843.19.peg.2345</a>	yes	<input type=&#39;button&#39; class=&#39;button&#39; value=&#39;find&#39; onclick=&#39;window.open("?page=SearchGene&fr=NAD(P)H oxidoreductase YRKL (EC 1.6.99.-)&organism=6666666.640629&subsystem=Flavodoxin&template_gene=fig|59843.19.peg.2345");&#39;>	no
A	Cofactors, Vitamins, Prosthetic Groups, Pigments	Tetrapyrroles	Cobalamin synthesis	Adenosylcobinamide kinase (EC 2.7.1.156)	<a href=&#39;?page=Annotation&feature=fig|59843.19.peg.771&#39; target=_blank>fig|59843.19.peg.771</a>	yes	<input type=&#39;button&#39; class=&#39;button&#39; value=&#39;find&#39; onclick=&#39;window.open("?page=SearchGene&fr=Adenosylcobinamide kinase (EC 2.7.1.156)&organism=6666666.640629&subsystem=Cobalamin_synthesis&template_gene=fig|59843.19.peg.771");&#39;>	no
A	Cofactors, Vitamins, Prosthetic Groups, Pigments	Tetrapyrroles	Cobalamin synthesis	Adenosylcobinamide-phosphate guanylyltransferase (EC 2.7.7.62)	<a href=&#39;?page=Annotation&feature=fig|59843.19.peg.771&#39; target=_blank>fig|59843.19.peg.771</a>	yes	<input type=&#39;button&#39; class=&#39;button&#39; value=&#39;find&#39; onclick=&#39;window.open("?page=SearchGene&fr=Adenosylcobinamide-phosphate guanylyltransferase (EC 2.7.7.62)&organism=6666666.640629&subsystem=Cobalamin_synthesis&template_gene=fig|59843.19.peg.771");&#39;>	no
A	Cofactors, Vitamins, Prosthetic Groups, Pigments	Tetrapyrroles	Cobalamin synthesis	Adenosylcobinamide-phosphate synthase (EC 6.3.1.10)	<a href=&#39;?page=Annotation&feature=fig|59843.19.peg.777&#39; target=_blank>fig|59843.19.peg.777</a>	yes	<input type=&#39;button&#39; class=&#39;button&#39; value=&#39;find&#39; onclick=&#39;window.open("?page=SearchGene&fr=Adenosylcobinamide-phosphate synthase (EC 6.3.1.10)&organism=6666666.640629&subsystem=Cobalamin_synthesis&template_gene=fig|59843.19.peg.777");&#39;>	no
A	Cofactors, Vitamins, Prosthetic Groups, Pigments	Tetrapyrroles	Cobalamin synthesis	Cobalamin synthase (EC 2.7.8.26)	<a href=&#39;?page=Annotation&feature=fig|59843.19.peg.770&#39; target=_blank>fig|59843.19.peg.770</a>	yes	<input type=&#39;button&#39; class=&#39;button&#39; value=&#39;find&#39; onclick=&#39;window.open("?page=SearchGene&fr=Cobalamin synthase (EC 2.7.8.26)&organism=6666666.640629&subsystem=Cobalamin_synthesis&template_gene=fig|59843.19.peg.770");&#39;>	no
A	Cofactors, Vitamins, Prosthetic Groups, Pigments	Tetrapyrroles	Cobalamin synthesis	Cobalt-precorrin-3b C17-methyltransferase	<a href=&#39;?page=Annotation&feature=fig|59843.19.peg.1747&#39; target=_blank>fig|59843.19.peg.1747</a>	yes	<input type=&#39;button&#39; class=&#39;button&#39; value=&#39;find&#39; onclick=&#39;window.open("?page=SearchGene&fr=Cobalt-precorrin-3b C17-methyltransferase&organism=6666666.640629&subsystem=Cobalamin_synthesis&template_gene=fig|59843.19.peg.1747");&#39;>	no
A	Cofactors, Vitamins, Prosthetic Groups, Pigments	Tetrapyrroles	Cobalamin synthesis	Cobyric acid synthase (EC 6.3.5.10)	<a href=&#39;?page=Annotation&feature=fig|59843.19.peg.3953&#39; target=_blank>fig|59843.19.peg.3953</a>	yes	<input type=&#39;button&#39; class=&#39;button&#39; value=&#39;find&#39; onclick=&#39;window.open("?page=SearchGene&fr=Cobyric acid synthase (EC 6.3.5.10)&organism=6666666.640629&subsystem=Cobalamin_synthesis&template_gene=fig|59843.19.peg.3953");&#39;>	no
A	Cofactors, Vitamins, Prosthetic Groups, Pigments	Tetrapyrroles	Cobalamin synthesis	L-threonine 3-O-phosphate decarboxylase (EC 4.1.1.81)	<a href=&#39;?page=Annotation&feature=fig|59843.19.peg.779&#39; target=_blank>fig|59843.19.peg.779</a>	yes	<input type=&#39;button&#39; class=&#39;button&#39; value=&#39;find&#39; onclick=&#39;window.open("?page=SearchGene&fr=L-threonine 3-O-phosphate decarboxylase (EC 4.1.1.81)&organism=6666666.640629&subsystem=Cobalamin_synthesis&template_gene=fig|59843.19.peg.779");&#39;>	no
A	Cofactors, Vitamins, Prosthetic Groups, Pigments	Tetrapyrroles	Cobalamin synthesis	Nicotinate-nucleotide--dimethylbenzimidazole phosphoribosyltransferase (EC 2.4.2.21)	<a href=&#39;?page=Annotation&feature=fig|59843.19.peg.772&#39; target=_blank>fig|59843.19.peg.772</a>	yes	<input type=&#39;button&#39; class=&#39;button&#39; value=&#39;find&#39; onclick=&#39;window.open("?page=SearchGene&fr=Nicotinate-nucleotide--dimethylbenzimidazole phosphoribosyltransferase (EC 2.4.2.21)&organism=6666666.640629&subsystem=Cobalamin_synthesis&template_gene=fig|59843.19.peg.772");&#39;>	no
A and B	Cofactors, Vitamins, Prosthetic Groups, Pigments	no subcategory	Thiamin biosynthesis	1-deoxy-D-xylulose 5-phosphate synthase (EC 2.2.1.7)	<a href=&#39;?page=Annotation&feature=fig|59843.19.peg.4041&#39; target=_blank>fig|59843.19.peg.4041</a>	yes	<a href=&#39;?page=Annotation&feature=fig|6666666.640629.peg.378&#39; target=_blank>fig|6666666.640629.peg.378</a>	yes
A and B	Cofactors, Vitamins, Prosthetic Groups, Pigments	no subcategory	Thiamin biosynthesis	Glycine oxidase ThiO (EC 1.4.3.19)	<a href=&#39;?page=Annotation&feature=fig|59843.19.peg.3258&#39; target=_blank>fig|59843.19.peg.3258</a>	yes	<a href=&#39;?page=Annotation&feature=fig|6666666.640629.peg.2650&#39; target=_blank>fig|6666666.640629.peg.2650</a>	yes
A and B	Cofactors, Vitamins, Prosthetic Groups, Pigments	no subcategory	Thiamin biosynthesis	Hydroxyethylthiazole kinase (EC 2.7.1.50)	<a href=&#39;?page=Annotation&feature=fig|59843.19.peg.3061&#39; target=_blank>fig|59843.19.peg.3061</a>	yes	<a href=&#39;?page=Annotation&feature=fig|6666666.640629.peg.4316&#39; target=_blank>fig|6666666.640629.peg.4316</a>	yes
A and B	Cofactors, Vitamins, Prosthetic Groups, Pigments	no subcategory	Thiamin biosynthesis	Substrate-specific component YkoE of thiamin-regulated ECF transporter for HydroxyMethylPyrimidine	<a href=&#39;?page=Annotation&feature=fig|59843.19.peg.1013&#39; target=_blank>fig|59843.19.peg.1013</a>, <a href=&#39;?page=Annotation&feature=fig|59843.19.peg.2798&#39; target=_blank>fig|59843.19.peg.2798</a>	yes	<a href=&#39;?page=Annotation&feature=fig|6666666.640629.peg.1032&#39; target=_blank>fig|6666666.640629.peg.1032</a>, <a href=&#39;?page=Annotation&feature=fig|6666666.640629.peg.2601&#39; target=_blank>fig|6666666.640629.peg.2601</a>	yes
A and B	Cofactors, Vitamins, Prosthetic Groups, Pigments	no subcategory	Thiamin biosynthesis	Thiamin pyrophosphokinase (EC 2.7.6.2)	<a href=&#39;?page=Annotation&feature=fig|59843.19.peg.4335&#39; target=_blank>fig|59843.19.peg.4335</a>	yes	<a href=&#39;?page=Annotation&feature=fig|6666666.640629.peg.2370&#39; target=_blank>fig|6666666.640629.peg.2370</a>	yes
A and B	Cofactors, Vitamins, Prosthetic Groups, Pigments	no subcategory	Thiamin biosynthesis	Thiamin-phosphate pyrophosphorylase (EC 2.5.1.3)	<a href=&#39;?page=Annotation&feature=fig|59843.19.peg.3063&#39; target=_blank>fig|59843.19.peg.3063</a>, <a href=&#39;?page=Annotation&feature=fig|59843.19.peg.3255&#39; target=_blank>fig|59843.19.peg.3255</a>	yes	<a href=&#39;?page=Annotation&feature=fig|6666666.640629.peg.2651&#39; target=_blank>fig|6666666.640629.peg.2651</a>, <a href=&#39;?page=Annotation&feature=fig|6666666.640629.peg.4317&#39; target=_blank>fig|6666666.640629.peg.4317</a>	yes
A and B	Cofactors, Vitamins, Prosthetic Groups, Pigments	no subcategory	Thiamin biosynthesis	Transmembrane component YkoC of energizing module of thiamin-regulated ECF transporter for HydroxyMethylPyrimidine	<a href=&#39;?page=Annotation&feature=fig|59843.19.peg.1011&#39; target=_blank>fig|59843.19.peg.1011</a>	yes	<a href=&#39;?page=Annotation&feature=fig|6666666.640629.peg.1034&#39; target=_blank>fig|6666666.640629.peg.1034</a>, <a href=&#39;?page=Annotation&feature=fig|6666666.640629.peg.2599&#39; target=_blank>fig|6666666.640629.peg.2599</a>	yes
A	Cofactors, Vitamins, Prosthetic Groups, Pigments	no subcategory	Thiamin biosynthesis	Additional substrate-binding component of thiamin-regulated ECF transporter for HydroxyMethylPyrimidine	<a href=&#39;?page=Annotation&feature=fig|59843.19.peg.5579&#39; target=_blank>fig|59843.19.peg.5579</a>	yes	<input type=&#39;button&#39; class=&#39;button&#39; value=&#39;find&#39; onclick=&#39;window.open("?page=SearchGene&fr=Additional substrate-binding component of thiamin-regulated ECF transporter for HydroxyMethylPyrimidine&organism=6666666.640629&subsystem=Thiamin_biosynthesis&template_gene=fig|59843.19.peg.5579");&#39;>	no
A	Cofactors, Vitamins, Prosthetic Groups, Pigments	no subcategory	Thiamin biosynthesis	Hydroxymethylpyrimidine ABC transporter, ATPase component	<a href=&#39;?page=Annotation&feature=fig|59843.19.peg.3599&#39; target=_blank>fig|59843.19.peg.3599</a>, <a href=&#39;?page=Annotation&feature=fig|59843.19.peg.4281&#39; target=_blank>fig|59843.19.peg.4281</a>	yes	<input type=&#39;button&#39; class=&#39;button&#39; value=&#39;find&#39; onclick=&#39;window.open("?page=SearchGene&fr=Hydroxymethylpyrimidine ABC transporter, ATPase component&organism=6666666.640629&subsystem=Thiamin_biosynthesis&template_gene=fig|59843.19.peg.3599");&#39;>	no
A	Cofactors, Vitamins, Prosthetic Groups, Pigments	no subcategory	Thiamin biosynthesis	Hydroxymethylpyrimidine ABC transporter, transmembrane component	<a href=&#39;?page=Annotation&feature=fig|59843.19.peg.2600&#39; target=_blank>fig|59843.19.peg.2600</a>, <a href=&#39;?page=Annotation&feature=fig|59843.19.peg.3600&#39; target=_blank>fig|59843.19.peg.3600</a>, <a href=&#39;?page=Annotation&feature=fig|59843.19.peg.4282&#39; target=_blank>fig|59843.19.peg.4282</a>	yes	<input type=&#39;button&#39; class=&#39;button&#39; value=&#39;find&#39; onclick=&#39;window.open("?page=SearchGene&fr=Hydroxymethylpyrimidine ABC transporter, transmembrane component&organism=6666666.640629&subsystem=Thiamin_biosynthesis&template_gene=fig|59843.19.peg.2600");&#39;>	no
A and B	DNA Metabolism	DNA repair	DNA repair, UvrABC system	Excinuclease ABC subunit A	<a href=&#39;?page=Annotation&feature=fig|59843.19.peg.324&#39; target=_blank>fig|59843.19.peg.324</a>, <a href=&#39;?page=Annotation&feature=fig|59843.19.peg.1477&#39; target=_blank>fig|59843.19.peg.1477</a>	yes	<a href=&#39;?page=Annotation&feature=fig|6666666.640629.peg.897&#39; target=_blank>fig|6666666.640629.peg.897</a>	yes
A and B	DNA Metabolism	DNA repair	DNA repair, UvrABC system	Excinuclease ABC subunit B	<a href=&#39;?page=Annotation&feature=fig|59843.19.peg.1478&#39; target=_blank>fig|59843.19.peg.1478</a>	yes	<a href=&#39;?page=Annotation&feature=fig|6666666.640629.peg.898&#39; target=_blank>fig|6666666.640629.peg.898</a>, <a href=&#39;?page=Annotation&feature=fig|6666666.640629.peg.899&#39; target=_blank>fig|6666666.640629.peg.899</a>	yes
A and B	DNA Metabolism	DNA repair	DNA repair, UvrABC system	Excinuclease ABC subunit C	<a href=&#39;?page=Annotation&feature=fig|59843.19.peg.1048&#39; target=_blank>fig|59843.19.peg.1048</a>	yes	<a href=&#39;?page=Annotation&feature=fig|6666666.640629.peg.129&#39; target=_blank>fig|6666666.640629.peg.129</a>	yes
A and B	DNA Metabolism	DNA repair	DNA repair, bacterial	A/G-specific adenine glycosylase (EC 3.2.2.-)	<a href=&#39;?page=Annotation&feature=fig|59843.19.peg.2818&#39; target=_blank>fig|59843.19.peg.2818</a>	yes	<a href=&#39;?page=Annotation&feature=fig|6666666.640629.peg.3364&#39; target=_blank>fig|6666666.640629.peg.3364</a>	yes
A and B	DNA Metabolism	DNA repair	DNA repair, bacterial	DNA polymerase IV (EC 2.7.7.7)	<a href=&#39;?page=Annotation&feature=fig|59843.19.peg.226&#39; target=_blank>fig|59843.19.peg.226</a>, <a href=&#39;?page=Annotation&feature=fig|59843.19.peg.882&#39; target=_blank>fig|59843.19.peg.882</a>	yes	<a href=&#39;?page=Annotation&feature=fig|6666666.640629.peg.405&#39; target=_blank>fig|6666666.640629.peg.405</a>	yes
A and B	DNA Metabolism	DNA repair	DNA repair, bacterial	DNA repair protein RadA	<a href=&#39;?page=Annotation&feature=fig|59843.19.peg.1419&#39; target=_blank>fig|59843.19.peg.1419</a>	yes	<a href=&#39;?page=Annotation&feature=fig|6666666.640629.peg.4169&#39; target=_blank>fig|6666666.640629.peg.4169</a>	yes
A and B	DNA Metabolism	DNA repair	DNA repair, bacterial	DNA repair protein RecN	<a href=&#39;?page=Annotation&feature=fig|59843.19.peg.4045&#39; target=_blank>fig|59843.19.peg.4045</a>	yes	<a href=&#39;?page=Annotation&feature=fig|6666666.640629.peg.381&#39; target=_blank>fig|6666666.640629.peg.381</a>	yes
A and B	DNA Metabolism	DNA repair	DNA repair, bacterial	Endonuclease IV (EC 3.1.21.2)	<a href=&#39;?page=Annotation&feature=fig|59843.19.peg.812&#39; target=_blank>fig|59843.19.peg.812</a>, <a href=&#39;?page=Annotation&feature=fig|59843.19.peg.4313&#39; target=_blank>fig|59843.19.peg.4313</a>	yes	<a href=&#39;?page=Annotation&feature=fig|6666666.640629.peg.301&#39; target=_blank>fig|6666666.640629.peg.301</a>	yes
A and B	DNA Metabolism	DNA repair	DNA repair, bacterial	Exodeoxyribonuclease VII large subunit (EC 3.1.11.6)	<a href=&#39;?page=Annotation&feature=fig|59843.19.peg.4038&#39; target=_blank>fig|59843.19.peg.4038</a>	yes	<a href=&#39;?page=Annotation&feature=fig|6666666.640629.peg.374&#39; target=_blank>fig|6666666.640629.peg.374</a>	yes
A and B	DNA Metabolism	DNA repair	DNA repair, bacterial	Exodeoxyribonuclease VII small subunit (EC 3.1.11.6)	<a href=&#39;?page=Annotation&feature=fig|59843.19.peg.4039&#39; target=_blank>fig|59843.19.peg.4039</a>	yes	<a href=&#39;?page=Annotation&feature=fig|6666666.640629.peg.375&#39; target=_blank>fig|6666666.640629.peg.375</a>	yes
A and B	DNA Metabolism	DNA repair	DNA repair, bacterial	Exonuclease SbcC	<a href=&#39;?page=Annotation&feature=fig|59843.19.peg.3660&#39; target=_blank>fig|59843.19.peg.3660</a>	yes	<a href=&#39;?page=Annotation&feature=fig|6666666.640629.peg.2438&#39; target=_blank>fig|6666666.640629.peg.2438</a>	yes
A and B	DNA Metabolism	DNA repair	DNA repair, bacterial	Exonuclease SbcD	<a href=&#39;?page=Annotation&feature=fig|59843.19.peg.3659&#39; target=_blank>fig|59843.19.peg.3659</a>	yes	<a href=&#39;?page=Annotation&feature=fig|6666666.640629.peg.2439&#39; target=_blank>fig|6666666.640629.peg.2439</a>	yes
A and B	DNA Metabolism	DNA repair	DNA repair, bacterial	Methylated-DNA--protein-cysteine methyltransferase (EC 2.1.1.63)	<a href=&#39;?page=Annotation&feature=fig|59843.19.peg.2457&#39; target=_blank>fig|59843.19.peg.2457</a>, <a href=&#39;?page=Annotation&feature=fig|59843.19.peg.5006&#39; target=_blank>fig|59843.19.peg.5006</a>	yes	<a href=&#39;?page=Annotation&feature=fig|6666666.640629.peg.1276&#39; target=_blank>fig|6666666.640629.peg.1276</a>	yes
A and B	DNA Metabolism	DNA repair	DNA repair, bacterial	RecA protein	<a href=&#39;?page=Annotation&feature=fig|59843.19.peg.5378&#39; target=_blank>fig|59843.19.peg.5378</a>	yes	<a href=&#39;?page=Annotation&feature=fig|6666666.640629.peg.3496&#39; target=_blank>fig|6666666.640629.peg.3496</a>	yes
A and B	DNA Metabolism	DNA repair	DNA repair, bacterial	SOS-response repressor and protease LexA (EC 3.4.21.88)	<a href=&#39;?page=Annotation&feature=fig|59843.19.peg.4302&#39; target=_blank>fig|59843.19.peg.4302</a>	yes	<a href=&#39;?page=Annotation&feature=fig|6666666.640629.peg.3516&#39; target=_blank>fig|6666666.640629.peg.3516</a>	yes
A and B	DNA Metabolism	DNA repair	DNA repair, bacterial	Single-stranded DNA-binding protein	<a href=&#39;?page=Annotation&feature=fig|59843.19.peg.1936&#39; target=_blank>fig|59843.19.peg.1936</a>	yes	<a href=&#39;?page=Annotation&feature=fig|6666666.640629.peg.2891&#39; target=_blank>fig|6666666.640629.peg.2891</a>	yes
A and B	DNA Metabolism	DNA repair	DNA repair, bacterial DinG and relatives	DinG family ATP-dependent helicase CPE1197	<a href=&#39;?page=Annotation&feature=fig|59843.19.peg.1661&#39; target=_blank>fig|59843.19.peg.1661</a>	yes	<a href=&#39;?page=Annotation&feature=fig|6666666.640629.peg.3857&#39; target=_blank>fig|6666666.640629.peg.3857</a>	yes
A and B	DNA Metabolism	DNA repair	DNA repair, bacterial DinG and relatives	DinG family ATP-dependent helicase YoaA	<a href=&#39;?page=Annotation&feature=fig|59843.19.peg.4176&#39; target=_blank>fig|59843.19.peg.4176</a>	yes	<a href=&#39;?page=Annotation&feature=fig|6666666.640629.peg.2476&#39; target=_blank>fig|6666666.640629.peg.2476</a>	yes
A and B	DNA Metabolism	DNA repair	DNA repair, bacterial MutL-MutS system	DNA mismatch repair protein MutL	<a href=&#39;?page=Annotation&feature=fig|59843.19.peg.4287&#39; target=_blank>fig|59843.19.peg.4287</a>	yes	<a href=&#39;?page=Annotation&feature=fig|6666666.640629.peg.3506&#39; target=_blank>fig|6666666.640629.peg.3506</a>	yes
A and B	DNA Metabolism	DNA repair	DNA repair, bacterial MutL-MutS system	DNA mismatch repair protein MutS	<a href=&#39;?page=Annotation&feature=fig|59843.19.peg.4286&#39; target=_blank>fig|59843.19.peg.4286</a>	yes	<a href=&#39;?page=Annotation&feature=fig|6666666.640629.peg.3505&#39; target=_blank>fig|6666666.640629.peg.3505</a>	yes
A and B	DNA Metabolism	DNA repair	DNA repair, bacterial MutL-MutS system	Recombination inhibitory protein MutS2	<a href=&#39;?page=Annotation&feature=fig|59843.19.peg.697&#39; target=_blank>fig|59843.19.peg.697</a>, <a href=&#39;?page=Annotation&feature=fig|59843.19.peg.4233&#39; target=_blank>fig|59843.19.peg.4233</a>	yes	<a href=&#39;?page=Annotation&feature=fig|6666666.640629.peg.121&#39; target=_blank>fig|6666666.640629.peg.121</a>	yes
A and B	DNA Metabolism	DNA repair	DNA repair, bacterial RecFOR pathway	ATP-dependent DNA helicase RecQ	<a href=&#39;?page=Annotation&feature=fig|59843.19.peg.739&#39; target=_blank>fig|59843.19.peg.739</a>, <a href=&#39;?page=Annotation&feature=fig|59843.19.peg.2988&#39; target=_blank>fig|59843.19.peg.2988</a>	yes	<a href=&#39;?page=Annotation&feature=fig|6666666.640629.peg.2541&#39; target=_blank>fig|6666666.640629.peg.2541</a>, <a href=&#39;?page=Annotation&feature=fig|6666666.640629.peg.4340&#39; target=_blank>fig|6666666.640629.peg.4340</a>	yes
A and B	DNA Metabolism	DNA repair	DNA repair, bacterial RecFOR pathway	DNA recombination and repair protein RecF	<a href=&#39;?page=Annotation&feature=fig|59843.19.peg.1986&#39; target=_blank>fig|59843.19.peg.1986</a>	yes	<a href=&#39;?page=Annotation&feature=fig|6666666.640629.peg.2929&#39; target=_blank>fig|6666666.640629.peg.2929</a>	yes
A and B	DNA Metabolism	DNA repair	DNA repair, bacterial RecFOR pathway	DNA recombination and repair protein RecO	<a href=&#39;?page=Annotation&feature=fig|59843.19.peg.3676&#39; target=_blank>fig|59843.19.peg.3676</a>	yes	<a href=&#39;?page=Annotation&feature=fig|6666666.640629.peg.286&#39; target=_blank>fig|6666666.640629.peg.286</a>	yes
A and B	DNA Metabolism	DNA repair	DNA repair, bacterial RecFOR pathway	RecA protein	<a href=&#39;?page=Annotation&feature=fig|59843.19.peg.5378&#39; target=_blank>fig|59843.19.peg.5378</a>	yes	<a href=&#39;?page=Annotation&feature=fig|6666666.640629.peg.3496&#39; target=_blank>fig|6666666.640629.peg.3496</a>	yes
A and B	DNA Metabolism	DNA repair	DNA repair, bacterial RecFOR pathway	Recombination protein RecR	<a href=&#39;?page=Annotation&feature=fig|59843.19.peg.2114&#39; target=_blank>fig|59843.19.peg.2114</a>	yes	<a href=&#39;?page=Annotation&feature=fig|6666666.640629.peg.2981&#39; target=_blank>fig|6666666.640629.peg.2981</a>	yes
A and B	DNA Metabolism	DNA repair	DNA repair, bacterial RecFOR pathway	Single-stranded DNA-binding protein	<a href=&#39;?page=Annotation&feature=fig|59843.19.peg.1936&#39; target=_blank>fig|59843.19.peg.1936</a>	yes	<a href=&#39;?page=Annotation&feature=fig|6666666.640629.peg.2891&#39; target=_blank>fig|6666666.640629.peg.2891</a>	yes
A and B	DNA Metabolism	DNA repair	DNA repair system including RecA, MutS and a hypothetical protein	DNA mismatch repair protein MutS	<a href=&#39;?page=Annotation&feature=fig|59843.19.peg.4286&#39; target=_blank>fig|59843.19.peg.4286</a>	yes	<a href=&#39;?page=Annotation&feature=fig|6666666.640629.peg.3505&#39; target=_blank>fig|6666666.640629.peg.3505</a>	yes
A and B	DNA Metabolism	DNA repair	DNA repair system including RecA, MutS and a hypothetical protein	RecA protein	<a href=&#39;?page=Annotation&feature=fig|59843.19.peg.5378&#39; target=_blank>fig|59843.19.peg.5378</a>	yes	<a href=&#39;?page=Annotation&feature=fig|6666666.640629.peg.3496&#39; target=_blank>fig|6666666.640629.peg.3496</a>	yes
A and B	DNA Metabolism	DNA repair	DNA repair system including RecA, MutS and a hypothetical protein	Regulatory protein RecX	<a href=&#39;?page=Annotation&feature=fig|59843.19.peg.5377&#39; target=_blank>fig|59843.19.peg.5377</a>	yes	<a href=&#39;?page=Annotation&feature=fig|6666666.640629.peg.3353&#39; target=_blank>fig|6666666.640629.peg.3353</a>	yes
A and B	DNA Metabolism	DNA repair	Nonhomologous End-Joining in Bacteria	ATP-dependent DNA ligase (EC 6.5.1.1) clustered with Ku protein, LigD	<a href=&#39;?page=Annotation&feature=fig|59843.19.peg.923&#39; target=_blank>fig|59843.19.peg.923</a>, <a href=&#39;?page=Annotation&feature=fig|59843.19.peg.924&#39; target=_blank>fig|59843.19.peg.924</a>	yes	<a href=&#39;?page=Annotation&feature=fig|6666666.640629.peg.4307&#39; target=_blank>fig|6666666.640629.peg.4307</a>	yes
A and B	DNA Metabolism	DNA repair	Nonhomologous End-Joining in Bacteria	Ku domain protein	<a href=&#39;?page=Annotation&feature=fig|59843.19.peg.922&#39; target=_blank>fig|59843.19.peg.922</a>	yes	<a href=&#39;?page=Annotation&feature=fig|6666666.640629.peg.4308&#39; target=_blank>fig|6666666.640629.peg.4308</a>	yes
A and B	DNA Metabolism	DNA repair	RecA and RecX	RecA protein	<a href=&#39;?page=Annotation&feature=fig|59843.19.peg.5378&#39; target=_blank>fig|59843.19.peg.5378</a>	yes	<a href=&#39;?page=Annotation&feature=fig|6666666.640629.peg.3496&#39; target=_blank>fig|6666666.640629.peg.3496</a>	yes
A and B	DNA Metabolism	DNA repair	RecA and RecX	Regulatory protein RecX	<a href=&#39;?page=Annotation&feature=fig|59843.19.peg.5377&#39; target=_blank>fig|59843.19.peg.5377</a>	yes	<a href=&#39;?page=Annotation&feature=fig|6666666.640629.peg.3353&#39; target=_blank>fig|6666666.640629.peg.3353</a>	yes
A	DNA Metabolism	DNA repair	2-phosphoglycolate salvage	Phosphoglycolate phosphatase (EC 3.1.3.18)	<a href=&#39;?page=Annotation&feature=fig|59843.19.peg.525&#39; target=_blank>fig|59843.19.peg.525</a>, <a href=&#39;?page=Annotation&feature=fig|59843.19.peg.3518&#39; target=_blank>fig|59843.19.peg.3518</a>, <a href=&#39;?page=Annotation&feature=fig|59843.19.peg.4187&#39; target=_blank>fig|59843.19.peg.4187</a>	yes	<input type=&#39;button&#39; class=&#39;button&#39; value=&#39;find&#39; onclick=&#39;window.open("?page=SearchGene&fr=Phosphoglycolate phosphatase (EC 3.1.3.18)&organism=6666666.640629&subsystem=2-phosphoglycolate_salvage&template_gene=fig|59843.19.peg.525");&#39;>	no
A	DNA Metabolism	DNA repair	DNA repair, UvrABC system	Excinuclease ABC subunit A paralog of unknown function	<a href=&#39;?page=Annotation&feature=fig|59843.19.peg.2677&#39; target=_blank>fig|59843.19.peg.2677</a>	yes	<input type=&#39;button&#39; class=&#39;button&#39; value=&#39;find&#39; onclick=&#39;window.open("?page=SearchGene&fr=Excinuclease ABC subunit A paralog of unknown function&organism=6666666.640629&subsystem=DNA_repair,_UvrABC_system&template_gene=fig|59843.19.peg.2677");&#39;>	no
A	DNA Metabolism	DNA repair	DNA repair, bacterial	ADA regulatory protein	<a href=&#39;?page=Annotation&feature=fig|59843.19.peg.2457&#39; target=_blank>fig|59843.19.peg.2457</a>, <a href=&#39;?page=Annotation&feature=fig|59843.19.peg.5007&#39; target=_blank>fig|59843.19.peg.5007</a>	yes	<input type=&#39;button&#39; class=&#39;button&#39; value=&#39;find&#39; onclick=&#39;window.open("?page=SearchGene&fr=ADA regulatory protein&organism=6666666.640629&subsystem=DNA_repair,_bacterial&template_gene=fig|59843.19.peg.2457");&#39;>	no
A	DNA Metabolism	DNA repair	DNA repair, bacterial	DNA repair exonuclease family protein YhaO	<a href=&#39;?page=Annotation&feature=fig|59843.19.peg.197&#39; target=_blank>fig|59843.19.peg.197</a>	yes	<input type=&#39;button&#39; class=&#39;button&#39; value=&#39;find&#39; onclick=&#39;window.open("?page=SearchGene&fr=DNA repair exonuclease family protein YhaO&organism=6666666.640629&subsystem=DNA_repair,_bacterial&template_gene=fig|59843.19.peg.197");&#39;>	no
A	DNA Metabolism	DNA repair	DNA repair, bacterial	Exodeoxyribonuclease III (EC 3.1.11.2)	<a href=&#39;?page=Annotation&feature=fig|59843.19.peg.584&#39; target=_blank>fig|59843.19.peg.584</a>	yes	<input type=&#39;button&#39; class=&#39;button&#39; value=&#39;find&#39; onclick=&#39;window.open("?page=SearchGene&fr=Exodeoxyribonuclease III (EC 3.1.11.2)&organism=6666666.640629&subsystem=DNA_repair,_bacterial&template_gene=fig|59843.19.peg.584");&#39;>	no
A	DNA Metabolism	DNA repair	DNA repair, bacterial UvrD and related helicases	ATP-dependent DNA helicase UvrD/PcrA	<a href=&#39;?page=Annotation&feature=fig|59843.19.peg.2578&#39; target=_blank>fig|59843.19.peg.2578</a>	yes	<input type=&#39;button&#39; class=&#39;button&#39; value=&#39;find&#39; onclick=&#39;window.open("?page=SearchGene&fr=ATP-dependent DNA helicase UvrD/PcrA&organism=6666666.640629&subsystem=DNA_repair,_bacterial_UvrD_and_related_helicases&template_gene=fig|59843.19.peg.2578");&#39;>	no
B	DNA Metabolism	DNA repair	DNA repair, bacterial RecBCD pathway	RecD-like DNA helicase YrrC	<input type=&#39;button&#39; value=&#39;find&#39; onclick=&#39;window.open("?page=SearchGene&fr=RecD-like DNA helicase YrrC&organism=59843.19&subsystem=DNA_repair,_bacterial_RecBCD_pathway&template_gene=fig|6666666.640629.peg.223");&#39;>	no	<a href=&#39;?page=Annotation&feature=fig|6666666.640629.peg.223&#39; target=_blank>fig|6666666.640629.peg.223</a>	yes
B	DNA Metabolism	DNA repair	DNA repair, bacterial RecFOR pathway	RecU Holliday junction resolvase	<input type=&#39;button&#39; value=&#39;find&#39; onclick=&#39;window.open("?page=SearchGene&fr=RecU Holliday junction resolvase&organism=59843.19&subsystem=DNA_repair,_bacterial_RecFOR_pathway&template_gene=fig|6666666.640629.peg.2468");&#39;>	no	<a href=&#39;?page=Annotation&feature=fig|6666666.640629.peg.2468&#39; target=_blank>fig|6666666.640629.peg.2468</a>	yes
A and B	DNA Metabolism	DNA replication	DNA replication strays	DNA polymerase III polC-type (EC 2.7.7.7)	<a href=&#39;?page=Annotation&feature=fig|59843.19.peg.5420&#39; target=_blank>fig|59843.19.peg.5420</a>	yes	<a href=&#39;?page=Annotation&feature=fig|6666666.640629.peg.3461&#39; target=_blank>fig|6666666.640629.peg.3461</a>	yes
A and B	DNA Metabolism	DNA replication	DNA topoisomerases, Type I, ATP-independent	DNA topoisomerase I (EC 5.99.1.2)	<a href=&#39;?page=Annotation&feature=fig|59843.19.peg.1001&#39; target=_blank>fig|59843.19.peg.1001</a>, <a href=&#39;?page=Annotation&feature=fig|59843.19.peg.5470&#39; target=_blank>fig|59843.19.peg.5470</a>	yes	<a href=&#39;?page=Annotation&feature=fig|6666666.640629.peg.3409&#39; target=_blank>fig|6666666.640629.peg.3409</a>	yes
A and B	DNA Metabolism	DNA replication	DNA topoisomerases, Type I, ATP-independent	DNA topoisomerase III (EC 5.99.1.2)	<a href=&#39;?page=Annotation&feature=fig|59843.19.peg.2911&#39; target=_blank>fig|59843.19.peg.2911</a>, <a href=&#39;?page=Annotation&feature=fig|59843.19.peg.4346&#39; target=_blank>fig|59843.19.peg.4346</a>	yes	<a href=&#39;?page=Annotation&feature=fig|6666666.640629.peg.1909&#39; target=_blank>fig|6666666.640629.peg.1909</a>	yes
A and B	DNA Metabolism	DNA replication	DNA topoisomerases, Type II, ATP-dependent	DNA gyrase subunit A (EC 5.99.1.3)	<a href=&#39;?page=Annotation&feature=fig|59843.19.peg.1990&#39; target=_blank>fig|59843.19.peg.1990</a>	yes	<a href=&#39;?page=Annotation&feature=fig|6666666.640629.peg.2932&#39; target=_blank>fig|6666666.640629.peg.2932</a>	yes
A and B	DNA Metabolism	DNA replication	DNA topoisomerases, Type II, ATP-dependent	DNA gyrase subunit B (EC 5.99.1.3)	<a href=&#39;?page=Annotation&feature=fig|59843.19.peg.1988&#39; target=_blank>fig|59843.19.peg.1988</a>, <a href=&#39;?page=Annotation&feature=fig|59843.19.peg.2224&#39; target=_blank>fig|59843.19.peg.2224</a>	yes	<a href=&#39;?page=Annotation&feature=fig|6666666.640629.peg.2931&#39; target=_blank>fig|6666666.640629.peg.2931</a>	yes
A and B	DNA Metabolism	DNA uptake, competence	DNA processing cluster	DNA polymerase III subunits gamma and tau (EC 2.7.7.7)	<a href=&#39;?page=Annotation&feature=fig|59843.19.peg.2112&#39; target=_blank>fig|59843.19.peg.2112</a>	yes	<a href=&#39;?page=Annotation&feature=fig|6666666.640629.peg.2979&#39; target=_blank>fig|6666666.640629.peg.2979</a>	yes
A and B	DNA Metabolism	DNA uptake, competence	DNA processing cluster	DNA topoisomerase III (EC 5.99.1.2)	<a href=&#39;?page=Annotation&feature=fig|59843.19.peg.2911&#39; target=_blank>fig|59843.19.peg.2911</a>, <a href=&#39;?page=Annotation&feature=fig|59843.19.peg.4346&#39; target=_blank>fig|59843.19.peg.4346</a>	yes	<a href=&#39;?page=Annotation&feature=fig|6666666.640629.peg.1909&#39; target=_blank>fig|6666666.640629.peg.1909</a>	yes
A and B	DNA Metabolism	DNA uptake, competence	DNA processing cluster	Recombination protein RecR	<a href=&#39;?page=Annotation&feature=fig|59843.19.peg.2114&#39; target=_blank>fig|59843.19.peg.2114</a>	yes	<a href=&#39;?page=Annotation&feature=fig|6666666.640629.peg.2981&#39; target=_blank>fig|6666666.640629.peg.2981</a>	yes
B	DNA Metabolism	DNA uptake, competence	DNA processing cluster	Inhibitor of pro-sigmaK processing BofA	<input type=&#39;button&#39; value=&#39;find&#39; onclick=&#39;window.open("?page=SearchGene&fr=Inhibitor of pro-sigmaK processing BofA&organism=59843.19&subsystem=DNA_processing_cluster&template_gene=fig|6666666.640629.peg.2983");&#39;>	no	<a href=&#39;?page=Annotation&feature=fig|6666666.640629.peg.2983&#39; target=_blank>fig|6666666.640629.peg.2983</a>	yes
A and B	DNA Metabolism	no subcategory	DNA ligases	ATP-dependent DNA ligase (EC 6.5.1.1) clustered with Ku protein, LigD	<a href=&#39;?page=Annotation&feature=fig|59843.19.peg.923&#39; target=_blank>fig|59843.19.peg.923</a>, <a href=&#39;?page=Annotation&feature=fig|59843.19.peg.924&#39; target=_blank>fig|59843.19.peg.924</a>	yes	<a href=&#39;?page=Annotation&feature=fig|6666666.640629.peg.4307&#39; target=_blank>fig|6666666.640629.peg.4307</a>	yes
A and B	DNA Metabolism	no subcategory	DNA ligases	Ku domain protein	<a href=&#39;?page=Annotation&feature=fig|59843.19.peg.922&#39; target=_blank>fig|59843.19.peg.922</a>	yes	<a href=&#39;?page=Annotation&feature=fig|6666666.640629.peg.4308&#39; target=_blank>fig|6666666.640629.peg.4308</a>	yes
A and B	DNA Metabolism	no subcategory	DNA structural proteins, bacterial	Chromosome partition protein smc	<a href=&#39;?page=Annotation&feature=fig|59843.19.peg.5504&#39; target=_blank>fig|59843.19.peg.5504</a>	yes	<a href=&#39;?page=Annotation&feature=fig|6666666.640629.peg.3390&#39; target=_blank>fig|6666666.640629.peg.3390</a>	yes
A and B	DNA Metabolism	no subcategory	DNA structural proteins, bacterial	DNA-binding protein HBsu	<a href=&#39;?page=Annotation&feature=fig|59843.19.peg.2029&#39; target=_blank>fig|59843.19.peg.2029</a>, <a href=&#39;?page=Annotation&feature=fig|59843.19.peg.4126&#39; target=_blank>fig|59843.19.peg.4126</a>	yes	<a href=&#39;?page=Annotation&feature=fig|6666666.640629.peg.2510&#39; target=_blank>fig|6666666.640629.peg.2510</a>	yes
A	DNA Metabolism	no subcategory	DNA ligases	ATP-dependent DNA ligase (EC 6.5.1.1)	<a href=&#39;?page=Annotation&feature=fig|59843.19.peg.893&#39; target=_blank>fig|59843.19.peg.893</a>	yes	<input type=&#39;button&#39; class=&#39;button&#39; value=&#39;find&#39; onclick=&#39;window.open("?page=SearchGene&fr=ATP-dependent DNA ligase (EC 6.5.1.1)&organism=6666666.640629&subsystem=DNA_ligases&template_gene=fig|59843.19.peg.893");&#39;>	no
A	DNA Metabolism	no subcategory	YcfH	Putative deoxyribonuclease similar to YcfH, type 3	<a href=&#39;?page=Annotation&feature=fig|59843.19.peg.2598&#39; target=_blank>fig|59843.19.peg.2598</a>	yes	<input type=&#39;button&#39; class=&#39;button&#39; value=&#39;find&#39; onclick=&#39;window.open("?page=SearchGene&fr=Putative deoxyribonuclease similar to YcfH, type 3&organism=6666666.640629&subsystem=YcfH&template_gene=fig|59843.19.peg.2598");&#39;>	no
B	DNA Metabolism	no subcategory	Restriction-Modification System	Type III restriction-modification system methylation subunit (EC 2.1.1.72)	<input type=&#39;button&#39; value=&#39;find&#39; onclick=&#39;window.open("?page=SearchGene&fr=Type III restriction-modification system methylation subunit (EC 2.1.1.72)&organism=59843.19&subsystem=Restriction-Modification_System&template_gene=fig|6666666.640629.peg.4059");&#39;>	no	<a href=&#39;?page=Annotation&feature=fig|6666666.640629.peg.4059&#39; target=_blank>fig|6666666.640629.peg.4059</a>	yes
A and B	Dormancy and Sporulation	no subcategory	SpoVS protein family	Stage III sporulation protein AE	<a href=&#39;?page=Annotation&feature=fig|59843.19.peg.4027&#39; target=_blank>fig|59843.19.peg.4027</a>	yes	<a href=&#39;?page=Annotation&feature=fig|6666666.640629.peg.365&#39; target=_blank>fig|6666666.640629.peg.365</a>	yes
A and B	Dormancy and Sporulation	no subcategory	Spore Core Dehydration	Spore maturation protein A	<a href=&#39;?page=Annotation&feature=fig|59843.19.peg.4093&#39; target=_blank>fig|59843.19.peg.4093</a>	yes	<a href=&#39;?page=Annotation&feature=fig|6666666.640629.peg.2557&#39; target=_blank>fig|6666666.640629.peg.2557</a>	yes
A and B	Dormancy and Sporulation	no subcategory	Spore Core Dehydration	Spore maturation protein B	<a href=&#39;?page=Annotation&feature=fig|59843.19.peg.4094&#39; target=_blank>fig|59843.19.peg.4094</a>	yes	<a href=&#39;?page=Annotation&feature=fig|6666666.640629.peg.2556&#39; target=_blank>fig|6666666.640629.peg.2556</a>	yes
A and B	Dormancy and Sporulation	no subcategory	Spore germination	Spore cortex-lytic enzyme CwlJ	<a href=&#39;?page=Annotation&feature=fig|59843.19.peg.4399&#39; target=_blank>fig|59843.19.peg.4399</a>	yes	<a href=&#39;?page=Annotation&feature=fig|6666666.640629.peg.1758&#39; target=_blank>fig|6666666.640629.peg.1758</a>, <a href=&#39;?page=Annotation&feature=fig|6666666.640629.peg.3614&#39; target=_blank>fig|6666666.640629.peg.3614</a>	yes
A and B	Dormancy and Sporulation	no subcategory	Spore germination	Spore cortex-lytic enzyme, lytic transglycosylase SleB	<a href=&#39;?page=Annotation&feature=fig|59843.19.peg.2639&#39; target=_blank>fig|59843.19.peg.2639</a>, <a href=&#39;?page=Annotation&feature=fig|59843.19.peg.5390&#39; target=_blank>fig|59843.19.peg.5390</a>	yes	<a href=&#39;?page=Annotation&feature=fig|6666666.640629.peg.2526&#39; target=_blank>fig|6666666.640629.peg.2526</a>	yes
A and B	Dormancy and Sporulation	no subcategory	Spore germination	Spore germination protein GerD	<a href=&#39;?page=Annotation&feature=fig|59843.19.peg.1348&#39; target=_blank>fig|59843.19.peg.1348</a>	yes	<a href=&#39;?page=Annotation&feature=fig|6666666.640629.peg.4103&#39; target=_blank>fig|6666666.640629.peg.4103</a>	yes
A and B	Dormancy and Sporulation	no subcategory	Spore germination	Spore germination protein YpeB	<a href=&#39;?page=Annotation&feature=fig|59843.19.peg.4111&#39; target=_blank>fig|59843.19.peg.4111</a>	yes	<a href=&#39;?page=Annotation&feature=fig|6666666.640629.peg.2525&#39; target=_blank>fig|6666666.640629.peg.2525</a>	yes
A and B	Dormancy and Sporulation	no subcategory	Sporulation-associated proteins with broader functions	Peptidyl-tRNA hydrolase (EC 3.1.1.29)	<a href=&#39;?page=Annotation&feature=fig|59843.19.peg.2021&#39; target=_blank>fig|59843.19.peg.2021</a>	yes	<a href=&#39;?page=Annotation&feature=fig|6666666.640629.peg.4278&#39; target=_blank>fig|6666666.640629.peg.4278</a>	yes
A and B	Dormancy and Sporulation	no subcategory	Sporulation-associated proteins with broader functions	RNA polymerase sporulation specific sigma factor SigH	<a href=&#39;?page=Annotation&feature=fig|59843.19.peg.1404&#39; target=_blank>fig|59843.19.peg.1404</a>	yes	<a href=&#39;?page=Annotation&feature=fig|6666666.640629.peg.4159&#39; target=_blank>fig|6666666.640629.peg.4159</a>	yes
A and B	Dormancy and Sporulation	no subcategory	Sporulation-associated proteins with broader functions	Stage III sporulation protein AE	<a href=&#39;?page=Annotation&feature=fig|59843.19.peg.4027&#39; target=_blank>fig|59843.19.peg.4027</a>	yes	<a href=&#39;?page=Annotation&feature=fig|6666666.640629.peg.365&#39; target=_blank>fig|6666666.640629.peg.365</a>	yes
A and B	Dormancy and Sporulation	no subcategory	Sporulation Cluster	FIG006789: Stage V sporulation protein	<a href=&#39;?page=Annotation&feature=fig|59843.19.peg.1080&#39; target=_blank>fig|59843.19.peg.1080</a>	yes	<a href=&#39;?page=Annotation&feature=fig|6666666.640629.peg.4274&#39; target=_blank>fig|6666666.640629.peg.4274</a>	yes
A and B	Dormancy and Sporulation	no subcategory	Sporulation Cluster	FIG007421: forespore shell protein	<a href=&#39;?page=Annotation&feature=fig|59843.19.peg.2031&#39; target=_blank>fig|59843.19.peg.2031</a>	yes	<a href=&#39;?page=Annotation&feature=fig|6666666.640629.peg.4271&#39; target=_blank>fig|6666666.640629.peg.4271</a>	yes
A and B	Dormancy and Sporulation	no subcategory	Sporulation Cluster	Nucleoside triphosphate pyrophosphohydrolase MazG (EC 3.6.1.8)	<a href=&#39;?page=Annotation&feature=fig|59843.19.peg.2028&#39; target=_blank>fig|59843.19.peg.2028</a>	yes	<a href=&#39;?page=Annotation&feature=fig|6666666.640629.peg.4273&#39; target=_blank>fig|6666666.640629.peg.4273</a>	yes
A and B	Dormancy and Sporulation	no subcategory	Sporulation Cluster	RNA binding protein, contains ribosomal protein S1 domain	<a href=&#39;?page=Annotation&feature=fig|59843.19.peg.2034&#39; target=_blank>fig|59843.19.peg.2034</a>	yes	<a href=&#39;?page=Annotation&feature=fig|6666666.640629.peg.4268&#39; target=_blank>fig|6666666.640629.peg.4268</a>	yes
A and B	Dormancy and Sporulation	no subcategory	Sporulation Cluster	Ribosome-associated heat shock protein implicated in the recycling of the 50S subunit (S4 paralog)	<a href=&#39;?page=Annotation&feature=fig|59843.19.peg.2030&#39; target=_blank>fig|59843.19.peg.2030</a>	yes	<a href=&#39;?page=Annotation&feature=fig|6666666.640629.peg.4272&#39; target=_blank>fig|6666666.640629.peg.4272</a>	yes
A and B	Dormancy and Sporulation	no subcategory	Sporulation Cluster	Spore cortex biosynthesis protein	<a href=&#39;?page=Annotation&feature=fig|59843.19.peg.2032&#39; target=_blank>fig|59843.19.peg.2032</a>	yes	<a href=&#39;?page=Annotation&feature=fig|6666666.640629.peg.4270&#39; target=_blank>fig|6666666.640629.peg.4270</a>	yes
A and B	Dormancy and Sporulation	no subcategory	Sporulation Cluster	Stage II sporulation protein D (SpoIID)	<a href=&#39;?page=Annotation&feature=fig|59843.19.peg.1555&#39; target=_blank>fig|59843.19.peg.1555</a>	yes	<a href=&#39;?page=Annotation&feature=fig|6666666.640629.peg.3039&#39; target=_blank>fig|6666666.640629.peg.3039</a>	yes
A and B	Dormancy and Sporulation	no subcategory	Sporulation Cluster	Stage II sporulation serine phosphatase for sigma-F activation (SpoIIE)	<a href=&#39;?page=Annotation&feature=fig|59843.19.peg.2035&#39; target=_blank>fig|59843.19.peg.2035</a>	yes	<a href=&#39;?page=Annotation&feature=fig|6666666.640629.peg.3814&#39; target=_blank>fig|6666666.640629.peg.3814</a>	yes
A and B	Dormancy and Sporulation	no subcategory	Sporulation Cluster	Stage V sporulation protein T, AbrB family transcriptional regulator (SpoVT)	<a href=&#39;?page=Annotation&feature=fig|59843.19.peg.2026&#39; target=_blank>fig|59843.19.peg.2026</a>	yes	<a href=&#39;?page=Annotation&feature=fig|6666666.640629.peg.4275&#39; target=_blank>fig|6666666.640629.peg.4275</a>	yes
A and B	Dormancy and Sporulation	no subcategory	Sporulation Cluster	Transcription-repair coupling factor	<a href=&#39;?page=Annotation&feature=fig|59843.19.peg.2024&#39; target=_blank>fig|59843.19.peg.2024</a>	yes	<a href=&#39;?page=Annotation&feature=fig|6666666.640629.peg.4276&#39; target=_blank>fig|6666666.640629.peg.4276</a>	yes
A and B	Dormancy and Sporulation	no subcategory	Sporulation Cluster	possible tetrapyrrole methyltransferase domain	<a href=&#39;?page=Annotation&feature=fig|59843.19.peg.2028&#39; target=_blank>fig|59843.19.peg.2028</a>	yes	<a href=&#39;?page=Annotation&feature=fig|6666666.640629.peg.4273&#39; target=_blank>fig|6666666.640629.peg.4273</a>	yes
A and B	Dormancy and Sporulation	no subcategory	Sporulation Cluster III A	Stage III sporulation protein AA	<a href=&#39;?page=Annotation&feature=fig|59843.19.peg.4023&#39; target=_blank>fig|59843.19.peg.4023</a>	yes	<a href=&#39;?page=Annotation&feature=fig|6666666.640629.peg.361&#39; target=_blank>fig|6666666.640629.peg.361</a>	yes
A and B	Dormancy and Sporulation	no subcategory	Sporulation Cluster III A	Stage III sporulation protein AB	<a href=&#39;?page=Annotation&feature=fig|59843.19.peg.4024&#39; target=_blank>fig|59843.19.peg.4024</a>	yes	<a href=&#39;?page=Annotation&feature=fig|6666666.640629.peg.362&#39; target=_blank>fig|6666666.640629.peg.362</a>	yes
A and B	Dormancy and Sporulation	no subcategory	Sporulation Cluster III A	Stage III sporulation protein AC	<a href=&#39;?page=Annotation&feature=fig|59843.19.peg.4025&#39; target=_blank>fig|59843.19.peg.4025</a>	yes	<a href=&#39;?page=Annotation&feature=fig|6666666.640629.peg.363&#39; target=_blank>fig|6666666.640629.peg.363</a>	yes
A and B	Dormancy and Sporulation	no subcategory	Sporulation Cluster III A	Stage III sporulation protein AD	<a href=&#39;?page=Annotation&feature=fig|59843.19.peg.4026&#39; target=_blank>fig|59843.19.peg.4026</a>	yes	<a href=&#39;?page=Annotation&feature=fig|6666666.640629.peg.364&#39; target=_blank>fig|6666666.640629.peg.364</a>	yes
A and B	Dormancy and Sporulation	no subcategory	Sporulation Cluster III A	Stage III sporulation protein AE	<a href=&#39;?page=Annotation&feature=fig|59843.19.peg.4027&#39; target=_blank>fig|59843.19.peg.4027</a>	yes	<a href=&#39;?page=Annotation&feature=fig|6666666.640629.peg.365&#39; target=_blank>fig|6666666.640629.peg.365</a>	yes
A and B	Dormancy and Sporulation	no subcategory	Sporulation Cluster III A	Stage III sporulation protein AF	<a href=&#39;?page=Annotation&feature=fig|59843.19.peg.4028&#39; target=_blank>fig|59843.19.peg.4028</a>	yes	<a href=&#39;?page=Annotation&feature=fig|6666666.640629.peg.366&#39; target=_blank>fig|6666666.640629.peg.366</a>	yes
A and B	Dormancy and Sporulation	no subcategory	Sporulation Cluster III A	Stage III sporulation protein AG	<a href=&#39;?page=Annotation&feature=fig|59843.19.peg.4029&#39; target=_blank>fig|59843.19.peg.4029</a>	yes	<a href=&#39;?page=Annotation&feature=fig|6666666.640629.peg.367&#39; target=_blank>fig|6666666.640629.peg.367</a>	yes
A and B	Dormancy and Sporulation	no subcategory	Sporulation Cluster III A	Stage III sporulation protein AH	<a href=&#39;?page=Annotation&feature=fig|59843.19.peg.4030&#39; target=_blank>fig|59843.19.peg.4030</a>	yes	<a href=&#39;?page=Annotation&feature=fig|6666666.640629.peg.368&#39; target=_blank>fig|6666666.640629.peg.368</a>	yes
A and B	Dormancy and Sporulation	no subcategory	Sporulation draft	FIG006789: Stage V sporulation protein	<a href=&#39;?page=Annotation&feature=fig|59843.19.peg.1080&#39; target=_blank>fig|59843.19.peg.1080</a>	yes	<a href=&#39;?page=Annotation&feature=fig|6666666.640629.peg.4274&#39; target=_blank>fig|6666666.640629.peg.4274</a>	yes
A and B	Dormancy and Sporulation	no subcategory	Sporulation draft	KinB signaling pathway activation protein	<a href=&#39;?page=Annotation&feature=fig|59843.19.peg.1347&#39; target=_blank>fig|59843.19.peg.1347</a>	yes	<a href=&#39;?page=Annotation&feature=fig|6666666.640629.peg.4102&#39; target=_blank>fig|6666666.640629.peg.4102</a>	yes
A and B	Dormancy and Sporulation	no subcategory	Sporulation draft	Spore germination protein GerD	<a href=&#39;?page=Annotation&feature=fig|59843.19.peg.1348&#39; target=_blank>fig|59843.19.peg.1348</a>	yes	<a href=&#39;?page=Annotation&feature=fig|6666666.640629.peg.4103&#39; target=_blank>fig|6666666.640629.peg.4103</a>	yes
A and B	Dormancy and Sporulation	no subcategory	Sporulation draft	Stage 0 sporulation protein YaaT	<a href=&#39;?page=Annotation&feature=fig|59843.19.peg.2001&#39; target=_blank>fig|59843.19.peg.2001</a>	yes	<a href=&#39;?page=Annotation&feature=fig|6666666.640629.peg.4300&#39; target=_blank>fig|6666666.640629.peg.4300</a>	yes
A and B	Dormancy and Sporulation	no subcategory	Sporulation draft	Stage 0 sporulation two-component response regulator (Spo0A)	<a href=&#39;?page=Annotation&feature=fig|59843.19.peg.4047&#39; target=_blank>fig|59843.19.peg.4047</a>	yes	<a href=&#39;?page=Annotation&feature=fig|6666666.640629.peg.383&#39; target=_blank>fig|6666666.640629.peg.383</a>	yes
A and B	Dormancy and Sporulation	no subcategory	Sporulation draft	Stage V sporulation protein B	<a href=&#39;?page=Annotation&feature=fig|59843.19.peg.3472&#39; target=_blank>fig|59843.19.peg.3472</a>	yes	<a href=&#39;?page=Annotation&feature=fig|6666666.640629.peg.203&#39; target=_blank>fig|6666666.640629.peg.203</a>	yes
A and B	Dormancy and Sporulation	no subcategory	Sporulation gene orphans	RNA polymerase sporulation specific sigma factor SigE	<a href=&#39;?page=Annotation&feature=fig|59843.19.peg.3736&#39; target=_blank>fig|59843.19.peg.3736</a>	yes	<a href=&#39;?page=Annotation&feature=fig|6666666.640629.peg.2331&#39; target=_blank>fig|6666666.640629.peg.2331</a>	yes
A and B	Dormancy and Sporulation	no subcategory	Sporulation gene orphans	RNA polymerase sporulation specific sigma factor SigF	<a href=&#39;?page=Annotation&feature=fig|59843.19.peg.4076&#39; target=_blank>fig|59843.19.peg.4076</a>	yes	<a href=&#39;?page=Annotation&feature=fig|6666666.640629.peg.2574&#39; target=_blank>fig|6666666.640629.peg.2574</a>	yes
A and B	Dormancy and Sporulation	no subcategory	Sporulation gene orphans	RNA polymerase sporulation specific sigma factor SigG	<a href=&#39;?page=Annotation&feature=fig|59843.19.peg.3737&#39; target=_blank>fig|59843.19.peg.3737</a>	yes	<a href=&#39;?page=Annotation&feature=fig|6666666.640629.peg.2332&#39; target=_blank>fig|6666666.640629.peg.2332</a>	yes
A and B	Dormancy and Sporulation	no subcategory	Sporulation gene orphans	RNA polymerase sporulation specific sigma factor SigK	<a href=&#39;?page=Annotation&feature=fig|59843.19.peg.3589&#39; target=_blank>fig|59843.19.peg.3589</a>	yes	<a href=&#39;?page=Annotation&feature=fig|6666666.640629.peg.238&#39; target=_blank>fig|6666666.640629.peg.238</a>	yes
A and B	Dormancy and Sporulation	no subcategory	Sporulation gene orphans	Sporulation sigma-E factor processing peptidase (SpoIIGA)	<a href=&#39;?page=Annotation&feature=fig|59843.19.peg.3735&#39; target=_blank>fig|59843.19.peg.3735</a>	yes	<a href=&#39;?page=Annotation&feature=fig|6666666.640629.peg.2330&#39; target=_blank>fig|6666666.640629.peg.2330</a>	yes
A and B	Dormancy and Sporulation	no subcategory	Sporulation gene orphans	Stage 0 sporulation two-component response regulator (Spo0A)	<a href=&#39;?page=Annotation&feature=fig|59843.19.peg.4047&#39; target=_blank>fig|59843.19.peg.4047</a>	yes	<a href=&#39;?page=Annotation&feature=fig|6666666.640629.peg.383&#39; target=_blank>fig|6666666.640629.peg.383</a>	yes
A and B	Dormancy and Sporulation	no subcategory	Sporulation gene orphans	Stage II sporulation protein D (SpoIID)	<a href=&#39;?page=Annotation&feature=fig|59843.19.peg.1555&#39; target=_blank>fig|59843.19.peg.1555</a>	yes	<a href=&#39;?page=Annotation&feature=fig|6666666.640629.peg.3039&#39; target=_blank>fig|6666666.640629.peg.3039</a>	yes
A and B	Dormancy and Sporulation	no subcategory	Sporulation gene orphans	Stage II sporulation protein M (SpoIIM)	<a href=&#39;?page=Annotation&feature=fig|59843.19.peg.4068&#39; target=_blank>fig|59843.19.peg.4068</a>	yes	<a href=&#39;?page=Annotation&feature=fig|6666666.640629.peg.2586&#39; target=_blank>fig|6666666.640629.peg.2586</a>	yes
A and B	Dormancy and Sporulation	no subcategory	Sporulation gene orphans	Stage II sporulation protein P	<a href=&#39;?page=Annotation&feature=fig|59843.19.peg.3637&#39; target=_blank>fig|59843.19.peg.3637</a>	yes	<a href=&#39;?page=Annotation&feature=fig|6666666.640629.peg.262&#39; target=_blank>fig|6666666.640629.peg.262</a>	yes
A and B	Dormancy and Sporulation	no subcategory	Sporulation gene orphans	Stage II sporulation protein related to metaloproteases (SpoIIQ)	<a href=&#39;?page=Annotation&feature=fig|59843.19.peg.1554&#39; target=_blank>fig|59843.19.peg.1554</a>	yes	<a href=&#39;?page=Annotation&feature=fig|6666666.640629.peg.3040&#39; target=_blank>fig|6666666.640629.peg.3040</a>	yes
A and B	Dormancy and Sporulation	no subcategory	Sporulation gene orphans	Stage II sporulation protein required for processing of pro-sigma-E (SpoIIR)	<a href=&#39;?page=Annotation&feature=fig|59843.19.peg.1580&#39; target=_blank>fig|59843.19.peg.1580</a>	yes	<a href=&#39;?page=Annotation&feature=fig|6666666.640629.peg.3014&#39; target=_blank>fig|6666666.640629.peg.3014</a>	yes
A and B	Dormancy and Sporulation	no subcategory	Sporulation gene orphans	Stage II sporulation serine phosphatase for sigma-F activation (SpoIIE)	<a href=&#39;?page=Annotation&feature=fig|59843.19.peg.2035&#39; target=_blank>fig|59843.19.peg.2035</a>	yes	<a href=&#39;?page=Annotation&feature=fig|6666666.640629.peg.3814&#39; target=_blank>fig|6666666.640629.peg.3814</a>	yes
A and B	Dormancy and Sporulation	no subcategory	Sporulation gene orphans	Stage III sporulation protein AA	<a href=&#39;?page=Annotation&feature=fig|59843.19.peg.4023&#39; target=_blank>fig|59843.19.peg.4023</a>	yes	<a href=&#39;?page=Annotation&feature=fig|6666666.640629.peg.361&#39; target=_blank>fig|6666666.640629.peg.361</a>	yes
A and B	Dormancy and Sporulation	no subcategory	Sporulation gene orphans	Stage III sporulation protein AB	<a href=&#39;?page=Annotation&feature=fig|59843.19.peg.4024&#39; target=_blank>fig|59843.19.peg.4024</a>	yes	<a href=&#39;?page=Annotation&feature=fig|6666666.640629.peg.362&#39; target=_blank>fig|6666666.640629.peg.362</a>	yes
A and B	Dormancy and Sporulation	no subcategory	Sporulation gene orphans	Stage III sporulation protein AC	<a href=&#39;?page=Annotation&feature=fig|59843.19.peg.4025&#39; target=_blank>fig|59843.19.peg.4025</a>	yes	<a href=&#39;?page=Annotation&feature=fig|6666666.640629.peg.363&#39; target=_blank>fig|6666666.640629.peg.363</a>	yes
[truncated: 652 more rows]

## Sheet: Feuil1
orgn A	P. glucanolyticus
[truncated: 1 more rows]
